# Supplementary material
Source: PubMed Central journal article supplement (PMC2593858)

**An Artificial  $\beta$ -Sheet that Dimerizes Through Parallel  $\beta$ -Sheet Interactions**

Sergiy Levin and James S. Nowick\*

*Department of Chemistry, University of California, Irvine, California,  
92697-2025*

**Supporting Information Table of Contents**

|                                                                                                                                   |      |
|-----------------------------------------------------------------------------------------------------------------------------------|------|
| General Procedures                                                                                                                | S4   |
| Synthetic Scheme                                                                                                                  | S5   |
| Representative synthetic procedures for the synthesis of the compound <b>1a</b> – <b>1f</b> : Artificial $\beta$ -sheet <b>1d</b> |      |
| Amide <b>4d</b>                                                                                                                   | S7   |
| <sup>1</sup> H NMR spectrum (CDCl <sub>3</sub> , 298 K)                                                                           | S8   |
| <sup>13</sup> C NMR spectrum (CDCl <sub>3</sub> , 298 K)                                                                          | S9   |
| Amine <b>5d</b> .                                                                                                                 | S10  |
| <sup>1</sup> H NMR spectrum (CDCl <sub>3</sub> , 298 K)                                                                           | S11  |
| <sup>13</sup> C NMR spectrum (CDCl <sub>3</sub> , 298 K)                                                                          | S12  |
| Ester <b>6d</b>                                                                                                                   | S13  |
| <sup>1</sup> H NMR spectrum (CDCl <sub>3</sub> , 298 K)                                                                           | S14  |
| <sup>13</sup> C NMR spectrum (CDCl <sub>3</sub> , 298 K)                                                                          | S15  |
| Amide <b>7d</b>                                                                                                                   | S16  |
| <sup>1</sup> H NMR spectrum (CDCl <sub>3</sub> , 298 K)                                                                           | S17  |
| <sup>13</sup> C NMR spectrum (CDCl <sub>3</sub> , 298 K)                                                                          | S18  |
| Salt <b>8d</b>                                                                                                                    | S19  |
| <sup>1</sup> H NMR spectrum (CD <sub>3</sub> SOCD <sub>3</sub> , 298 K)                                                           | S20  |
| <sup>13</sup> C NMR spectrum (CD <sub>3</sub> SOCD <sub>3</sub> , 298 K)                                                          | S21  |
| Oxazolidinone <b>9d</b> .                                                                                                         | S22  |
| <sup>1</sup> H NMR spectrum (CDCl <sub>3</sub> , 298 K)                                                                           | S23  |
| <sup>13</sup> C NMR spectrum (CDCl <sub>3</sub> , 298 K)                                                                          | S24  |
| Salt <b>10d</b>                                                                                                                   | S25  |
| <sup>1</sup> H NMR spectrum (CD <sub>3</sub> SOCD <sub>3</sub> , 298 K)                                                           | S26  |
| <sup>13</sup> C NMR spectrum (CD <sub>3</sub> SOCD <sub>3</sub> , 298 K)                                                          | S27  |
| Salt <b>12d</b>                                                                                                                   | S28  |
| <sup>1</sup> H NMR spectrum (CD <sub>3</sub> SOCD <sub>3</sub> , 298 K)                                                           | S29  |
| Artificial $\beta$ -sheet <b>1d</b>                                                                                               | S30  |
| <sup>1</sup> H NMR spectrum (CDCl <sub>3</sub> , 268 K)                                                                           | S31  |
| Spectroscopic data for the artificial $\beta$ -sheet <b>1a</b>                                                                    | S32  |
| <sup>1</sup> H NMR spectrum (800 MHz, 10 mM, CDCl <sub>3</sub> , 268 K)                                                           | S33  |
| COSY spectrum (800 MHz, 10 mM, CDCl <sub>3</sub> , 268 K)                                                                         | S35  |
| TOCSY spectrum (800 MHz, 10 mM, CDCl <sub>3</sub> , 268 K)                                                                        | S42  |
| NOESY spectrum (800 MHz, 10 mM, CDCl <sub>3</sub> , 268 K)                                                                        | S49  |
| ROESY spectrum (600 MHz, 10 mM, CDCl <sub>3</sub> , 268 K)                                                                        | S63  |
| Spectroscopic data for the artificial $\beta$ -sheet <b>1b</b>                                                                    | S64  |
| <sup>1</sup> H NMR spectrum (800 MHz, 6 mM, CDCl <sub>3</sub> , 268 K)                                                            | S65  |
| COSY spectrum (800 MHz, 6 mM, CDCl <sub>3</sub> , 268 K)                                                                          | S67  |
| TOCSY spectrum (800 MHz, 6 mM, CDCl <sub>3</sub> , 268 K)                                                                         | S74  |
| NOESY spectrum (800 MHz, 6 mM, CDCl <sub>3</sub> , 268 K)                                                                         | S81  |
| Spectroscopic data for the artificial $\beta$ -sheet <b>1c</b>                                                                    | S92  |
| <sup>1</sup> H NMR spectrum (800 MHz, 8 mM, CDCl <sub>3</sub> , 268 K)                                                            | S93  |
| COSY spectrum (800 MHz, 8 mM, CDCl <sub>3</sub> , 268 K)                                                                          | S95  |
| TOCSY spectrum (800 MHz, 8 mM, CDCl <sub>3</sub> , 268 K)                                                                         | S101 |
| NOESY spectrum (800 MHz, 8 mM, CDCl <sub>3</sub> , 268 K)                                                                         | S107 |
| Spectroscopic data for the artificial $\beta$ -sheet <b>1d</b>                                                                    | S115 |
| <sup>1</sup> H NMR spectrum (800 MHz, 20 mM, CDCl <sub>3</sub> , 268 K)                                                           | S116 |
| COSY spectrum (800 MHz, 20 mM, CDCl <sub>3</sub> , 268 K)                                                                         | S118 |
| TOCSY spectrum (800 MHz, 20 mM, CDCl <sub>3</sub> , 268 K)                                                                        | S124 |

|                                                                                                                   |      |
|-------------------------------------------------------------------------------------------------------------------|------|
| NOESY spectrum (800 MHz, 20 mM, CDCl <sub>3</sub> , 268 K)                                                        | S130 |
| Spectroscopic data for the artificial $\beta$ -sheet <b>1e</b>                                                    | S141 |
| <sup>1</sup> H NMR spectrum (800 MHz, 1 mM, CDCl <sub>3</sub> , 268 K)                                            | S142 |
| COSY spectrum (800 MHz, 1 mM, CDCl <sub>3</sub> , 268 K)                                                          | S144 |
| TOCSY spectrum (800 MHz, 1 mM, CDCl <sub>3</sub> , 268 K)                                                         | S150 |
| NOESY spectrum (800 MHz, 1 mM, CDCl <sub>3</sub> , 268 K)                                                         | S156 |
| Spectroscopic data for the artificial $\beta$ -sheet <b>1f</b>                                                    | S165 |
| <sup>1</sup> H NMR spectrum (800 MHz, 4 mM, CDCl <sub>3</sub> , 268 K)                                            | S166 |
| COSY spectrum (800 MHz, 4 mM, CDCl <sub>3</sub> , 268 K)                                                          | S168 |
| TOCSY spectrum (800 MHz, 4 mM, CDCl <sub>3</sub> , 268 K)                                                         | S176 |
| NOESY spectrum (800 MHz, 4 mM, CDCl <sub>3</sub> , 268 K)                                                         | S183 |
| Spectroscopic data for the artificial $\beta$ -sheet <b>2a</b>                                                    | S190 |
| <sup>1</sup> H NMR spectrum (800 MHz, 3 mM, CDCl <sub>3</sub> , 268 K)                                            | S191 |
| COSY spectrum (600 MHz, 2 mM, CDCl <sub>3</sub> , 268 K)                                                          | S192 |
| TOCSY spectrum (800 MHz, 3 mM, CDCl <sub>3</sub> , 268 K)                                                         | S197 |
| NOESY spectrum (800 MHz, 3 mM, CDCl <sub>3</sub> , 268 K)                                                         | S202 |
| NOESY Spectroscopic data for the artificial $\beta$ -sheet <b>1a</b> (800 MHz, 0.5 mM, CDCl <sub>3</sub> , 268 K) | S209 |
| HMQC Spectroscopic data for the artificial $\beta$ -sheet <b>1a</b> (600 MHz, 5 mM, CDCl <sub>3</sub> , 268 K)    | S214 |

**General Procedures.** Commercial solvents and reagents were used without further purification, with the exception of THF, which was dried by filtration through alumina according to the procedure of Grubbs.<sup>1</sup> Solution-phase reactions were monitored by thin-layer chromatography (TLC) and carried out on 250  $\mu\text{m}$  silica gel polyester plates on fluorescent silica gel with UV visualization. Column chromatography was performed on 40–63  $\mu\text{m}$  silica gel using flash chromatography. Solvents were removed by rotary evaporation. Residual solvents were removed under vacuum ( $< 0.01$  mmHg). Precipitated and recrystallized products were dried either under vacuum ( $< 0.01$  mmHg) or by air suction through a filter funnel. High resolution mass spectra were obtained by electrospray ionization (ESI) on a Waters Micromass LCT Premier (instrument variation  $\sigma < 5$  ppm). NMR spectra were recorded using a 500 MHz Bruker AVANCE<sup>TM</sup>, 600 MHz Bruker AVANCE<sup>TM</sup> spectrometers and Varian 800 MHz Unity Inova<sup>TM</sup> spectrometer. Chemical shifts are reported in parts per million (ppm) on the  $\delta$  scale. <sup>1</sup>H spectra NMR were referenced with TMS ( $\delta = 0.00$  ppm) and <sup>13</sup>C NMR NMR spectra were referenced either with TMS ( $\delta = 0.00$  ppm) or with DMSO-d<sub>6</sub> ( $\delta = 39.53$  ppm).

---

<sup>1</sup> Pangborn, A. B.; Giardello, M. A.; Grubbs, R. H.; Rosen, R. K.; Trimmers, F. J. *Organometallics* **1996**, *15*, 1518-1520.



## Synthetic Scheme (continued)

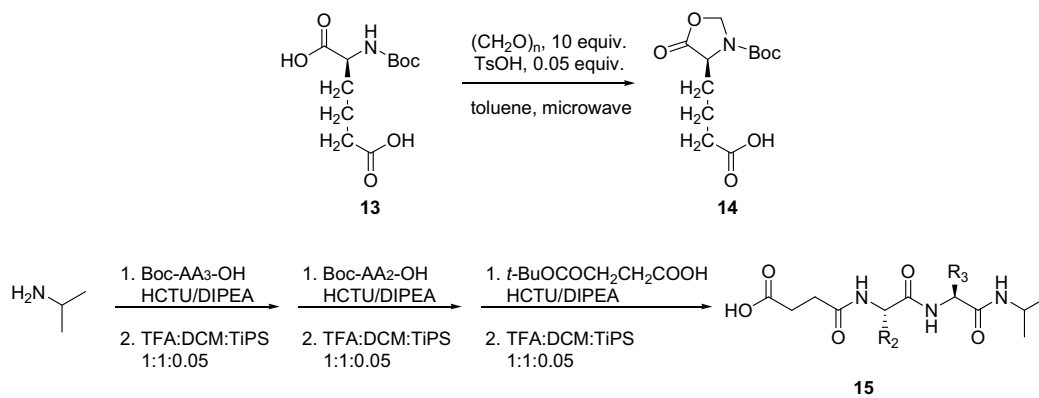

Representative synthetic procedures for the synthesis of the  
compound **1a – 1f**: Artificial  $\beta$ -sheet **1d**.

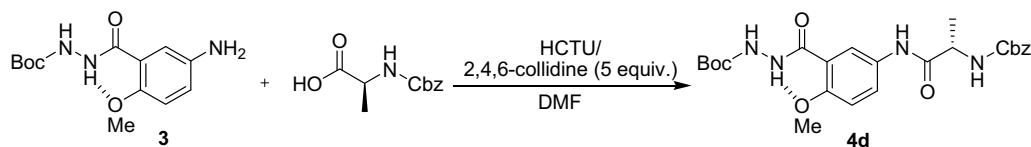

**Amide 4d.** A 500-mL, three-necked, round-bottomed flask equipped with a nitrogen inlet adapter, a glass stopper, a rubber septum, and a magnetic stirring bar was charged with aniline **3**<sup>2</sup> (2.7 g, 9.5 mmol) and DMF (100 mL). The apparatus was evacuated and flushed with nitrogen (3 times). A solution of Cbz-Ala-OH (2.4 g, 10.8 mmol) and HCTU (4.7 g, 11.4 mmol) in DMF (100 mL) was added to the stirred solution through syringe, followed by 2,4,6-collidine (6.3 mL, 48 mmol). The pale yellow solution was left under nitrogen for 24 h, then concentrated under vacuum. The residue was dissolved in dichloromethane (200 mL), and the solution was washed 1 M HCl (3  $\times$  ca. 100 mL), saturated aqueous NaHCO<sub>3</sub> (3  $\times$  ca. 100 mL), water (3  $\times$  ca. 100 mL), dried over MgSO<sub>4</sub>, filtered and concentrated to give 4.8 g (98%) of **4d** as a white solid. The compound was used without further purification.

<sup>2</sup> Tsai, J. H.; Waldman, A-S.; Nowick, J. S. *Bioorg. Med. Chem.*, **1999**, *7*, 29-38.





125 MHz <sup>13</sup>C NMR Spectrum in CDCl<sub>3</sub>

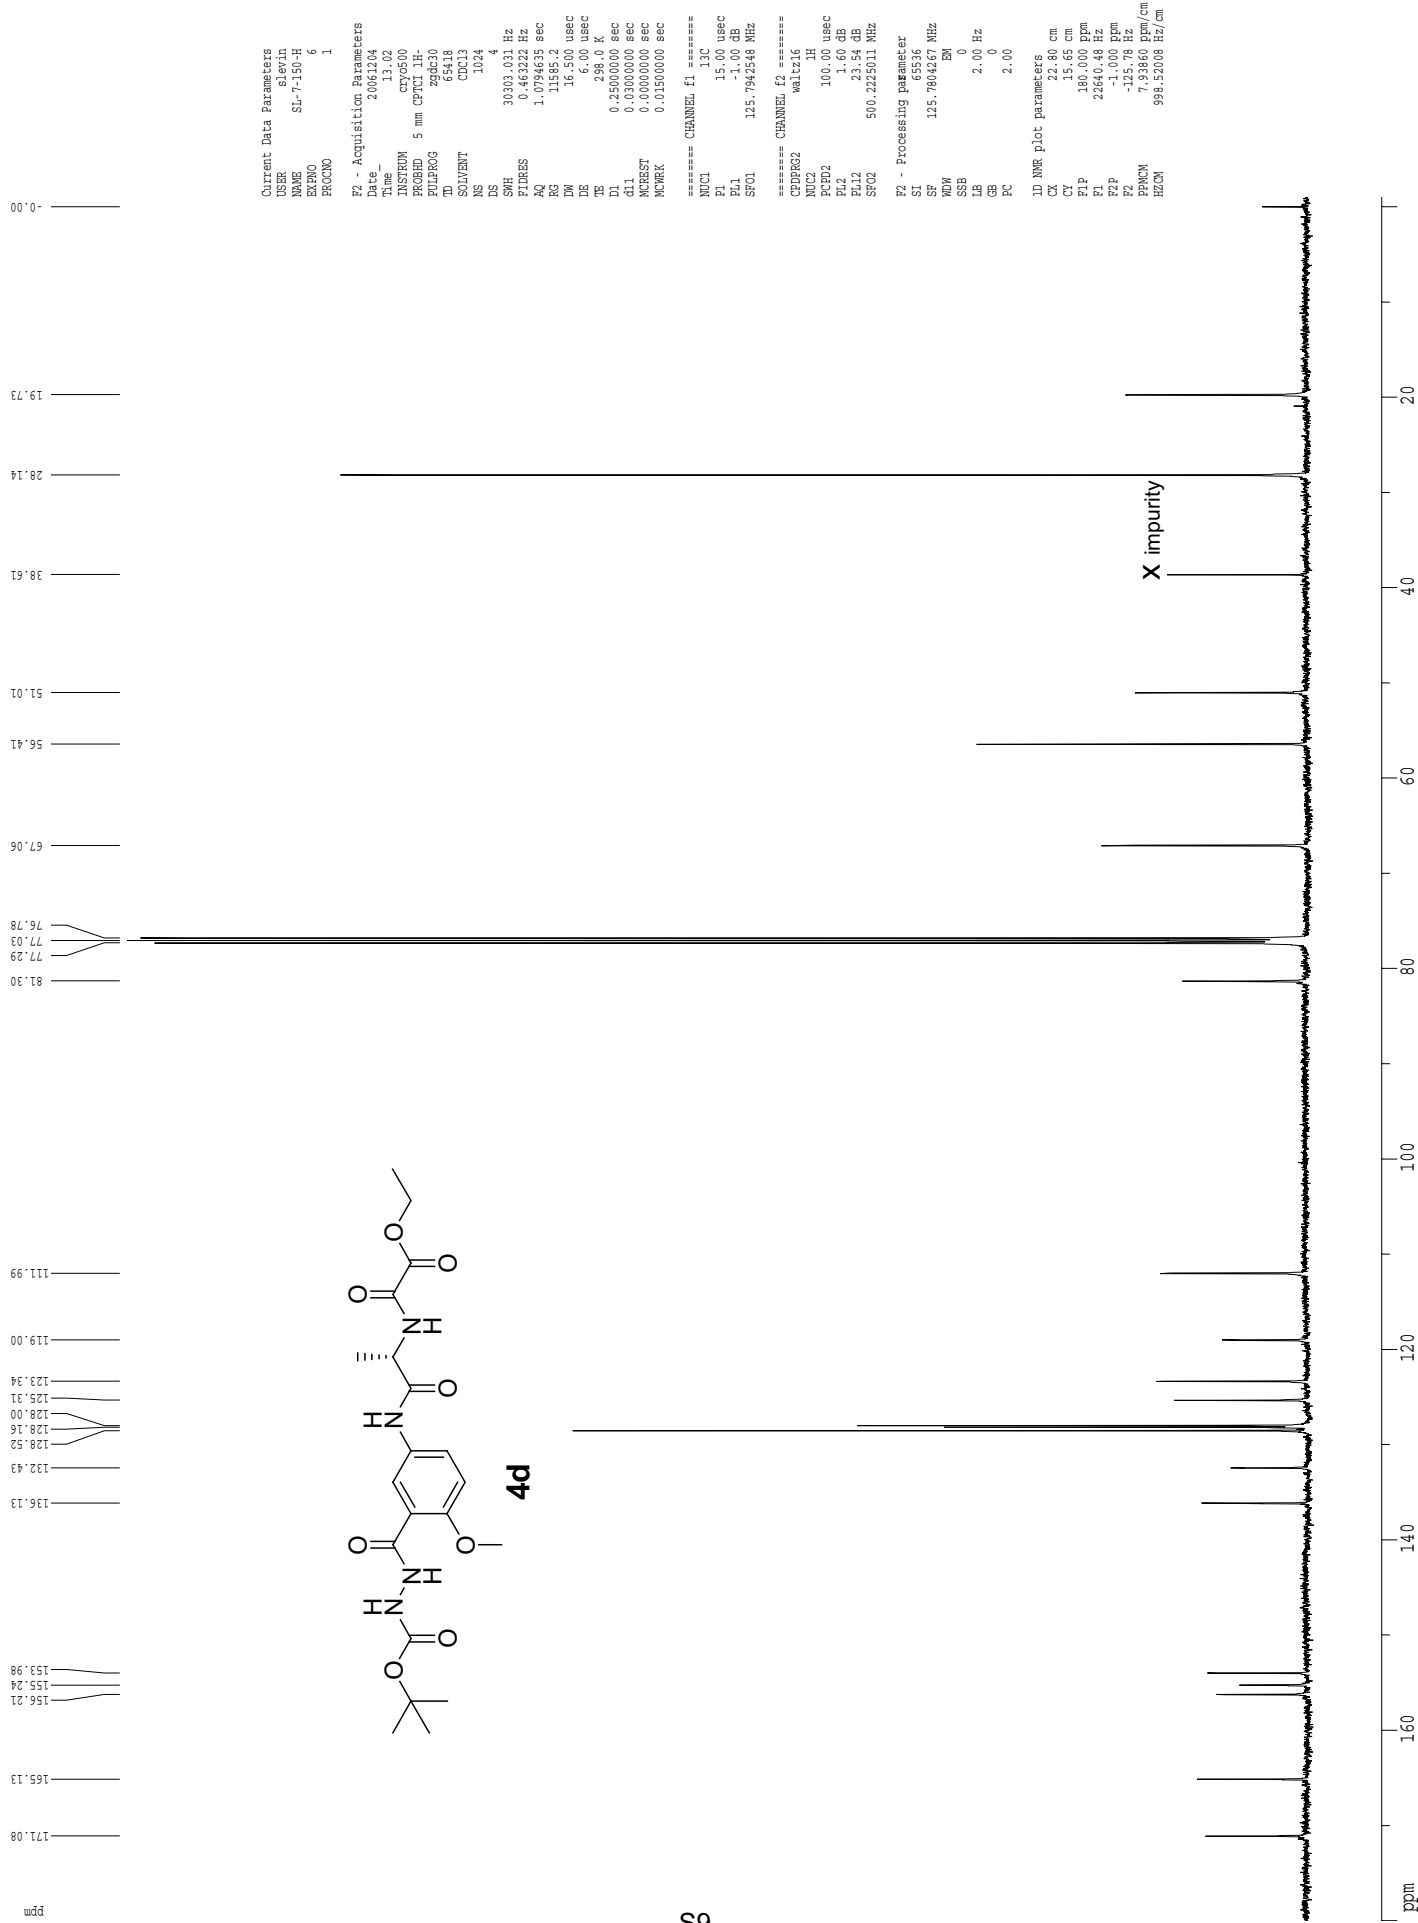

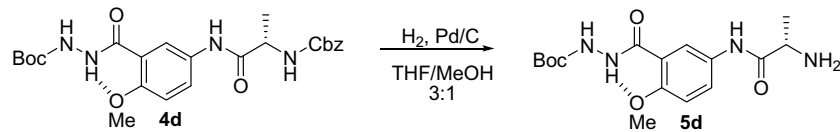

**Amine 5d.** A 500-mL, three-necked, round-bottomed flask equipped with a nitrogen inlet adapter, a glass stopper, a gas stopper, a gas inlet adapter fitted with a hydrogen balloon, and a magnetic stirring bar was charged with 250 mL of tetrahydrofuran, 100 mL of methanol, and amide **4d** (4.6 g, 9.5 mmol). 10% Pd/C (0.5 g) was added to the reaction mixture under the nitrogen flow. The flask was evacuated and filled with hydrogen and then maintained under the hydrogen atmosphere for 4.5 h. The reaction mixture was filtered through celite, the celite was washed with ethyl acetate (100 mL), and the combined solution was concentrated under vacuum yielding 3.6 g (109%) of amine **5d** as a fluffy white solid, which was used without further purification. An analytical sample was further dried under high vacuum.

500 MHz <sup>1</sup>H NMR Spectrum in CDCl<sub>3</sub>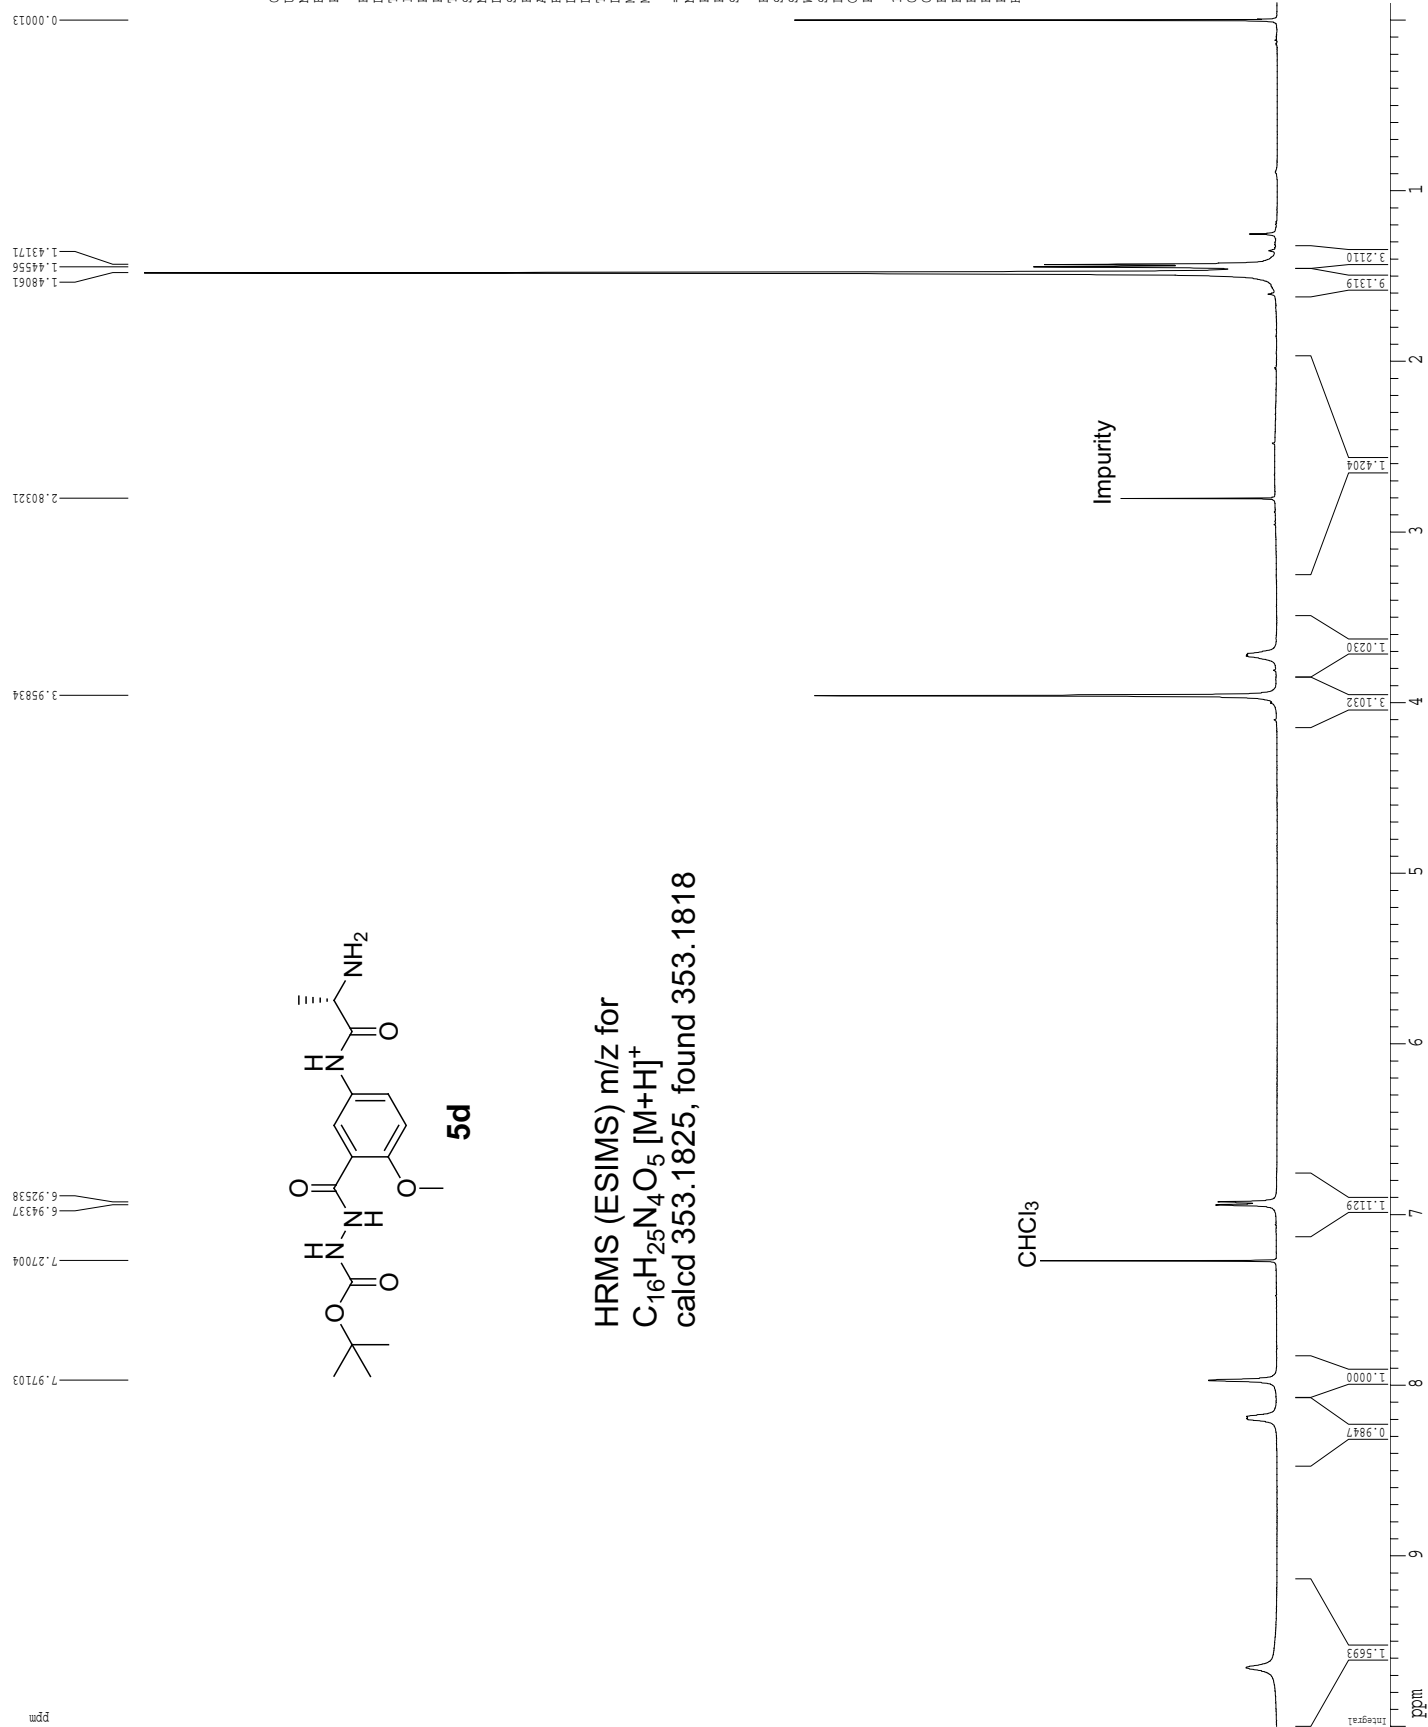

Current Data Parameter  
 USER slewin  
 NAME SL-7-179-H  
 EXNO 1  
 PRGNO 1

F2 - Acquisition Parameters  
 Date\_ 20061219  
 Time\_ 15:02  
 INSTRUM cryo500  
 PROBED 5 mm CPTCI 1H-  
 PULPROG zg30  
 TD 81728  
 SOLVENT CDCl3T  
 NS 8  
 DS 2  
 SFO 801.2520 Hz  
 FIDRES 0.098943 Hz  
 AQ 5.099996 sec  
 SFO 500.136266 MHz  
 DE 6.00 usec  
 TE 298.0 K  
 D1 0.1000000 sec  
 MCHES1 0.0000000 sec  
 MCHES2 0.0150000 sec

\*\*\*\*\* CHANNEL F1 \*\*\*\*\*  
 NUC1 1H  
 P1 8.00 usec  
 PL1 1.60 dB  
 SFO1 500.2235015 MHz

F2 - Processing parameter  
 SI 65536  
 SF 500.220266 MHz  
 WDW EM  
 SSB 0  
 LB 0.30 Hz  
 GB 0  
 PC 4.00

ID NMR plot parameters  
 CX 22.80 cm  
 CT 15.00 cm  
 F1P 10.000 ppm  
 F2P 0.000 Hz  
 F3P 0.000 Hz  
 F2 -50.02 Hz  
 FPMW 0.44498 ppm/cm  
 HZCN 221.58871 Hz/cm

HRMS (ESIMS) m/z for  
 $C_{16}H_{25}N_4O_5 [M+H]^+$   
 calcd 353.1825, found 353.1818

125 MHz C13 NMR Spectrum in CDCl<sub>3</sub>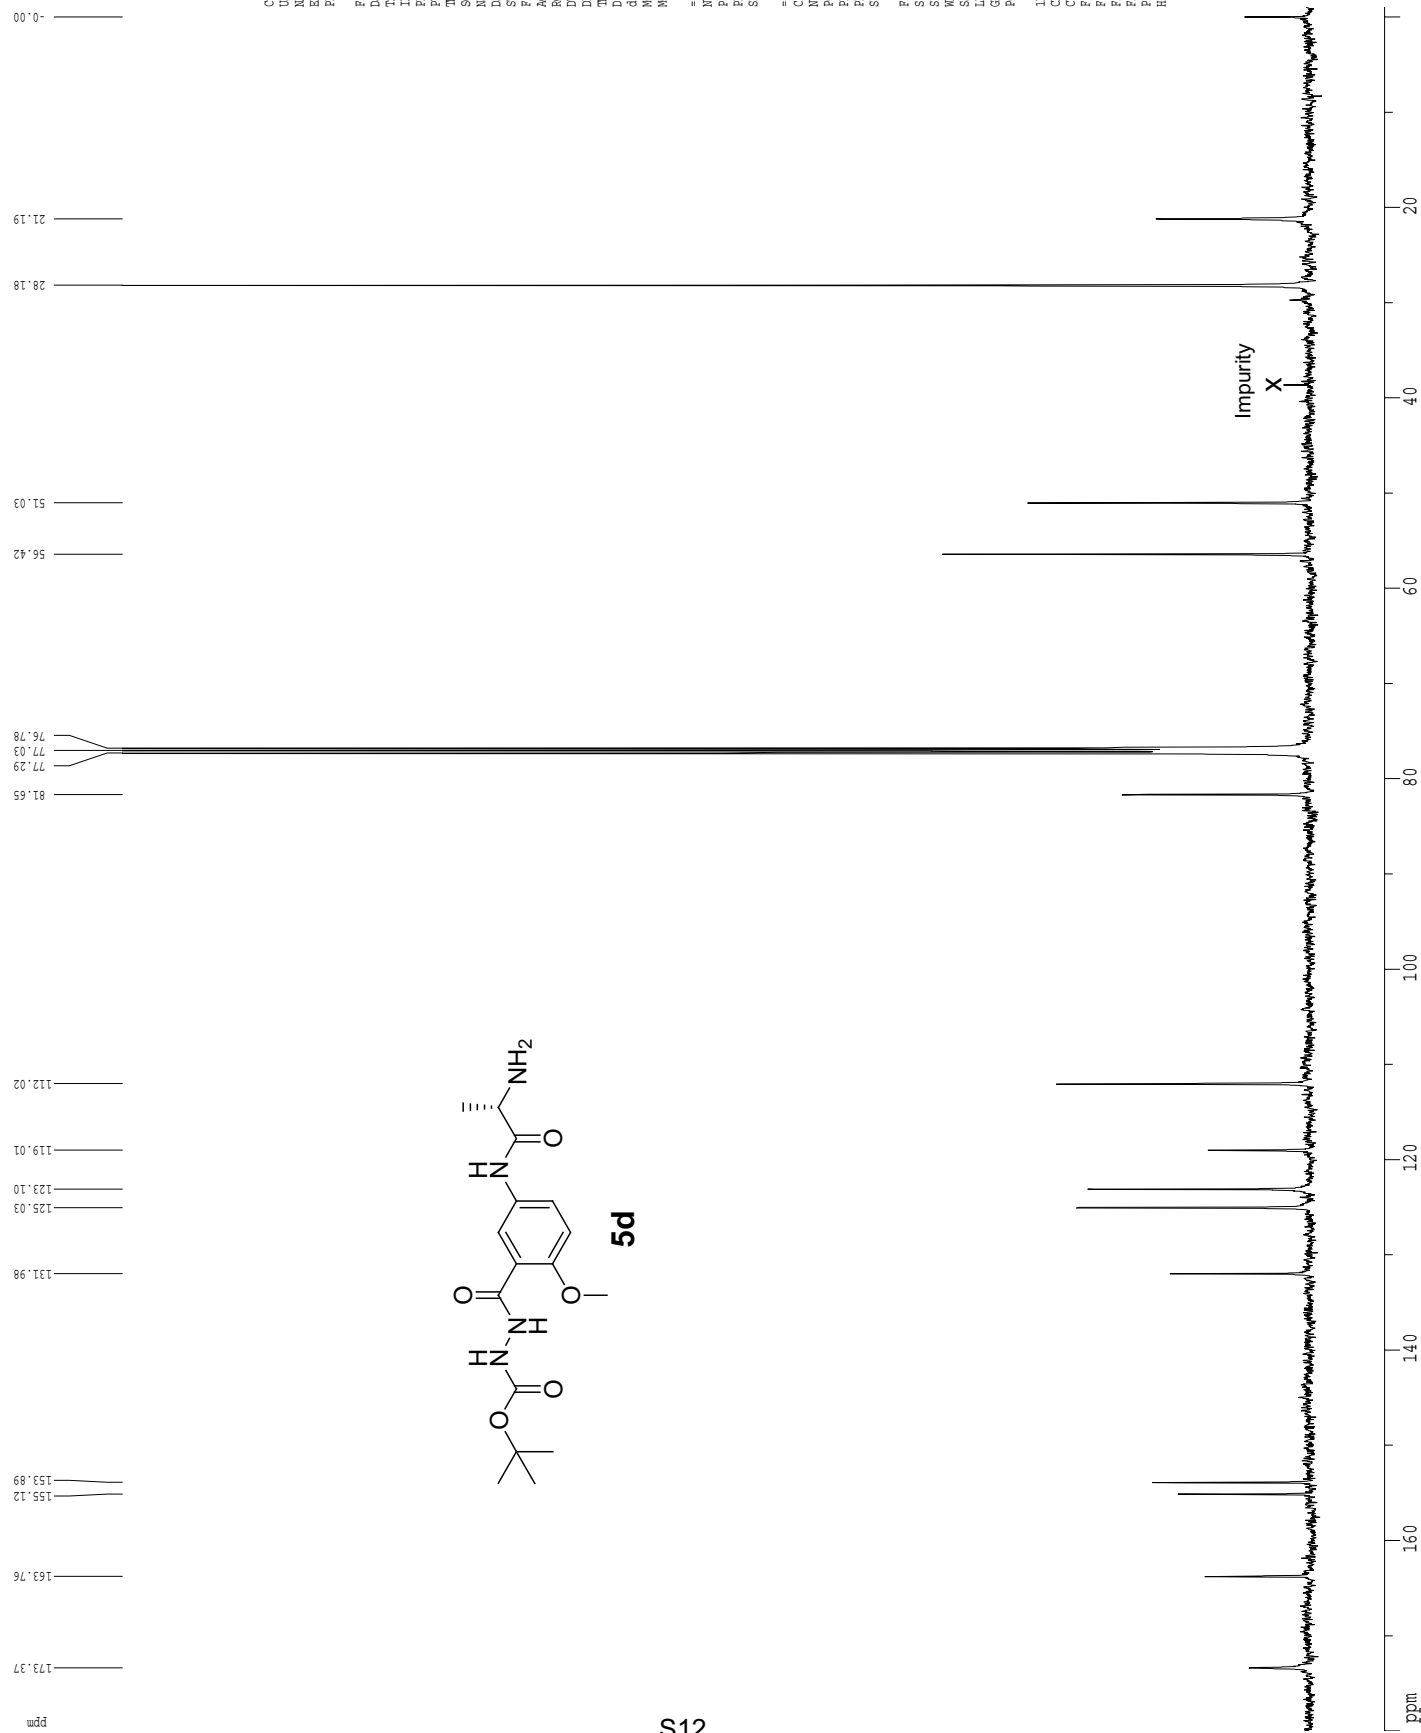

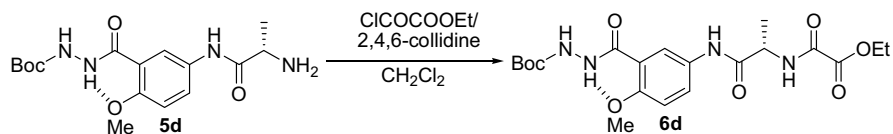

**Ester 6d.** A solution of the amide **5d** (3.30 g, 9.40 mmol) and 2,4,6-collidine (2.50 mL, 19.0 mmol) in dichloromethane (250 mL) was cooled to 0° C with an ice-bath. Ethyl chloroformate (1.05 mL, 9.40 mmol) was slowly added to the stirred solution over 15 min. The solution was left stirred for an extra 15 minutes and washed 1 M HCl (ca. 250 mL), saturated aqueous NaHCO<sub>3</sub> (ca. 250 mL), and water (ca. 250 mL). The solution was dried over MgSO<sub>4</sub>, filtered and concentrated to give 4.07 g (96%) of **6d** as a white solid, which was used without further purification. An analytical sample was recrystallized from the ethanol.

500 MHz <sup>1</sup>H NMR Spectrum in CDCl<sub>3</sub>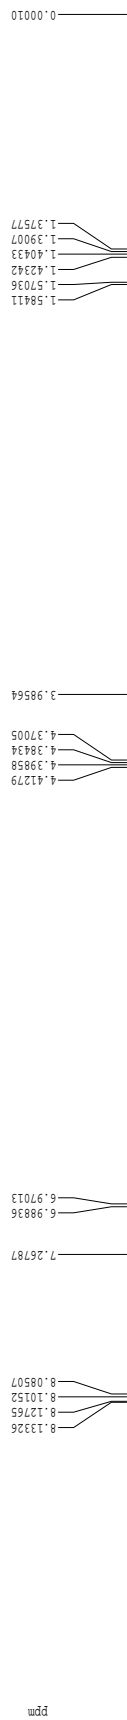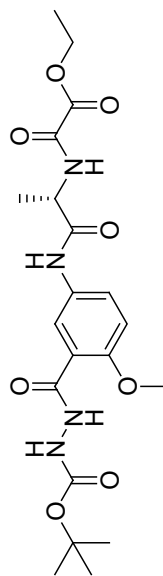**6d**

HRMS (ESIMS) m/z for  
 $C_{20}H_{28}N_4O_8Na [M+Na]^+$   
 calcd 475.1805, found 475.1813

```

Current Data Parameter
=====
Date_ 20061204
Time_ 12.02
NAME_ SL-7-155-H
EXPNO_ 4
PROCNO_ 1
F2 - Acquisition Parameters
=====
Date_ 20061204
Time_ 12.02
INSTRUM_ cryo500
PROBHD_ 5 mm CPTCI IH-
PULPROG_ zg30
AQ_ 81.728
SOLVENT_ CDCl3
NS_ 6
DS_ 2
SWH_ 8012.820 Hz
FIDRES_ 0.098043 Hz
AQ_ 5.099398 sec
RG_ 4.5
DM_ 62.400 usec
DE_ 6.00 usec
TE_ 298.0 K
D1_ 0.1000000 sec
MCREST_ 0.0000000 sec
MCWREK_ 0.0150000 sec
===== CHANNEL f1 =====
NUC1_ 13
P1_ 8.00 usec
PL1_ 1.60 dB
SFO1_ 500.235015 MHz
F2 - Processing parameter
=====
SI_ 65536
SF_ 500.2200276 MHz
WDW_ EM
SSB_ 0
LB_ 0.30 Hz
GB_ 0
PC_ 4.00
ID-NMR Plot Parameters
=====
CX_ 22.80 cm
CY_ 10.00 cm
F1_P_ 10.000 ppm
F1_F_ 5002.26 Hz
F2_P_ -0.100 ppm
F2_F_ -50.02 Hz
PPMCM_ 0.44298 ppm/cm
HZCM_ 221.58877 Hz/cm
  
```

S14

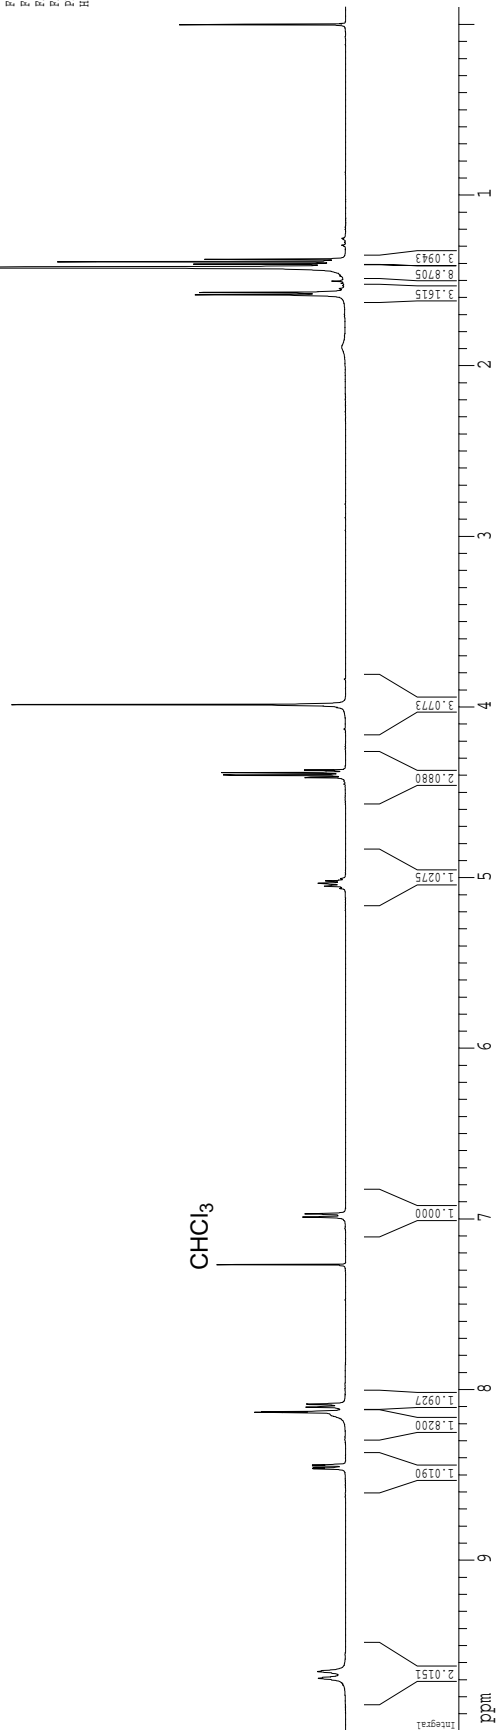

125 MHz <sup>13</sup>C NMR spectrum in CDCl<sub>3</sub>

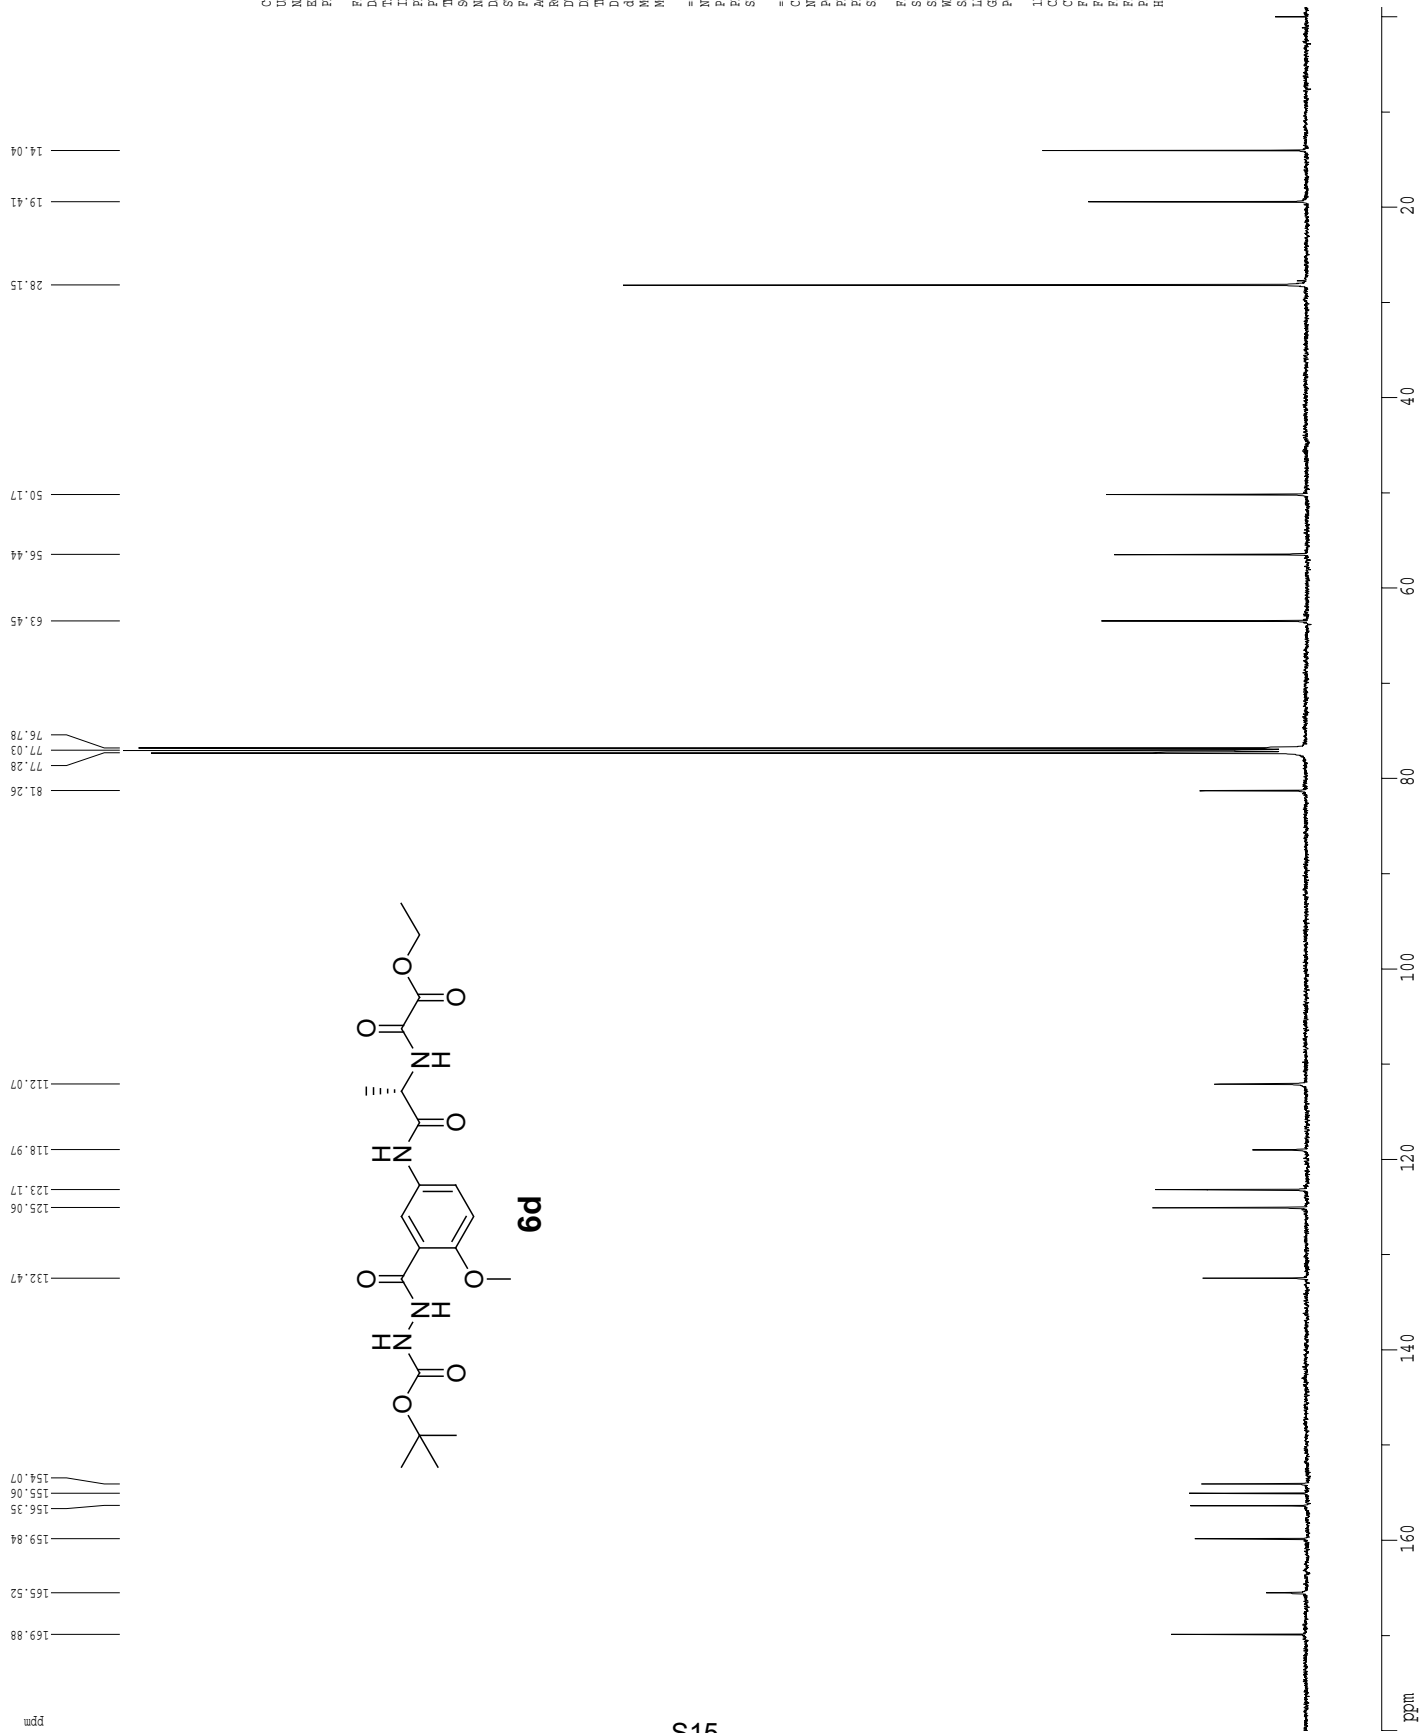

```

Current Data Parameters
USER          6Levin
NAME         SI-7-155-H
EXPNO        6
PROCNO       1

F2 - Acquisition Parameters
Date_        20061204
Time         12.06
INSTRUM     cryo500
PROBHD      5 mm CPYCI 1H-
PULPROG     zgpg30
TD           65418
SOLVENT     CDCl3
NS           2048
DS           4
SFO1         30303.031 Hz
FIDRES       0.463222 Hz
AQ           1.0794635 sec
RG           13004
DM           16.500 usec
DE           6.00 usec
TE           298.2 K
D1           0.2500000 sec
d11          0.0300000 sec
NUC1         13C
NUC2         13C
===== CHANNEL f1 =====
P1           15.00 usec
PL1          -1.00 dB
SFO1         125.7942548 MHz

===== CHANNEL f2 =====
CPDPRG2     waltz16
NUC2         1H
PCPD2       100.00 usec
PL2         1.60 dB
PL12        21.54 dB
SFO2         500.2225011 MHz

F2 - Processing parameters
SI           65536
SF           125.7942548 MHz
EM          0
SSB          0
LB           2.00 Hz
GB           0
PC           2.00

1D NMR plot parameters
CX           22.80 cm
CY           15.65 cm
FIP          180.000 Epm
F1           22640.48 Hz
F2P          -1.000 Epm
F3P          -12.578 Hz
FREQN1       71253.6 Epm/cm
HZCN         998.52008 Hz/cm
    
```

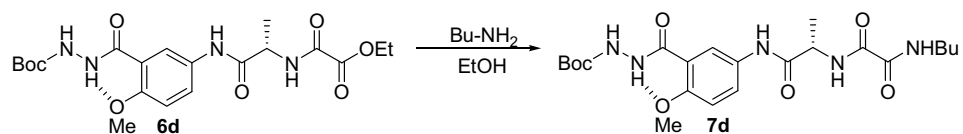

**Amide 7d.** Butylamine (5.0 mL, 54 mmol) was added in one portion to a solution of the ester **6d** (4.07 g, 9.00 mmol) in ethanol (150 mL). After 10 minutes a white precipitate formed. The precipitate was filtered and dried to yield 3.70 g (86%) of amide **7d** as a white solid.



500 MHz <sup>1</sup>H NMR R Spectrum in CDCl<sub>3</sub>

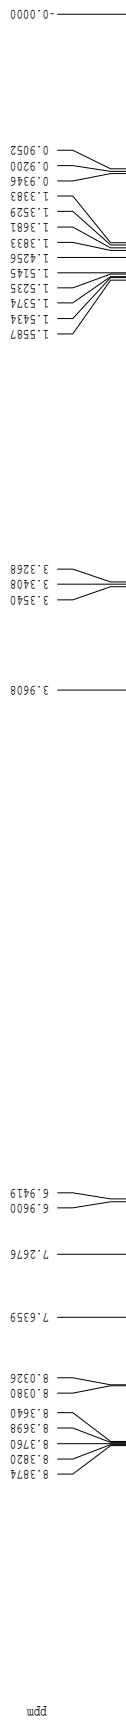

Current Data Parameter  
 USER slewin  
 NAME SL-7-156-cryo-H  
 EXPNO 1  
 PROCNO 1

F2 - Acquisition Parameters  
 Date\_ 20061129  
 Time 19:19  
 System cryo-1  
 PROBRG 5 mm CPYCH-1H  
 PULPROG zg30  
 TD 81728  
 SOLVENT CDCl3T  
 NS 8  
 DS 2  
 SWH 8012.820 Hz  
 FIDRES 0.098043 Hz  
 AQ 5.0989774 sec  
 RG 4.5  
 DW 62.400 usec  
 DE 6.00 usec  
 TE 296.0 K  
 ACFEAT 0.10000000 sec  
 ACRESST 0.00000000 sec  
 ACWRRK 0.01500000 sec

===== CHANNEL f1 =====  
 NUCL1 1H  
 P1 8.00 usec  
 PL1 1.60 dB  
 SFO1 500.2235015 MHz

F2 - Processing parameter  
 SI 65536  
 SF 500.2202278 MHz  
 WWA 0  
 SSB 0  
 LB 0.30 Hz  
 GB 0  
 PC 4.00

1D NMR plot parameters  
 CX 22.80 cm  
 CY 15.00 cm  
 P1P 10.000 ppm  
 F1 5002.20 Hz  
 F2P -0.100 ppm  
 FZ -50.02 Hz  
 FFRANCH 0.44629 ppm/cm  
 HZCN 221.56671 Hz/cm

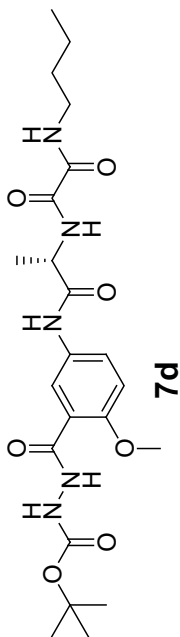

HRMS (ESIMS) m/z for  
 C<sub>22</sub>H<sub>33</sub>N<sub>5</sub>O<sub>7</sub>Na [M+Na]<sup>+</sup>  
 calcd 502.2278, found 502.2291

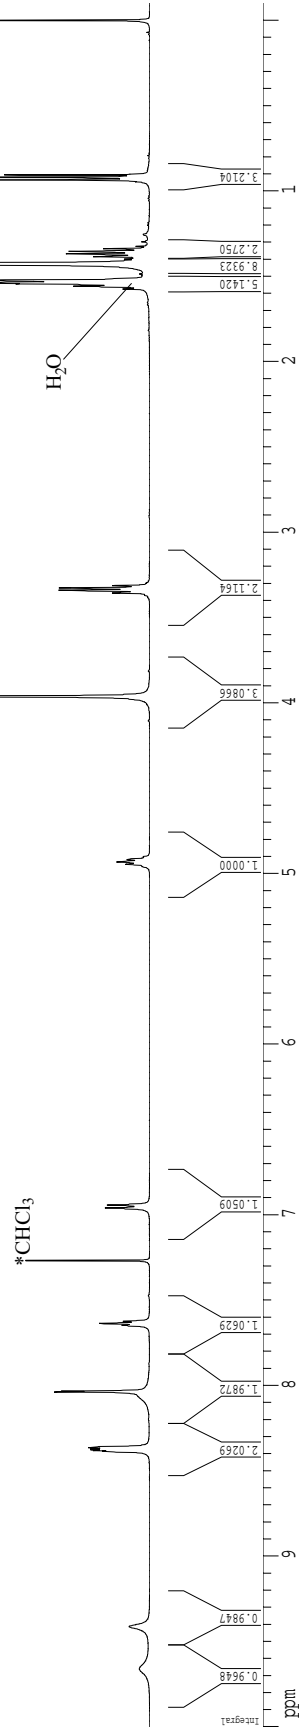

125MHz z13CNM R Spectrum in CDCl<sub>3</sub>

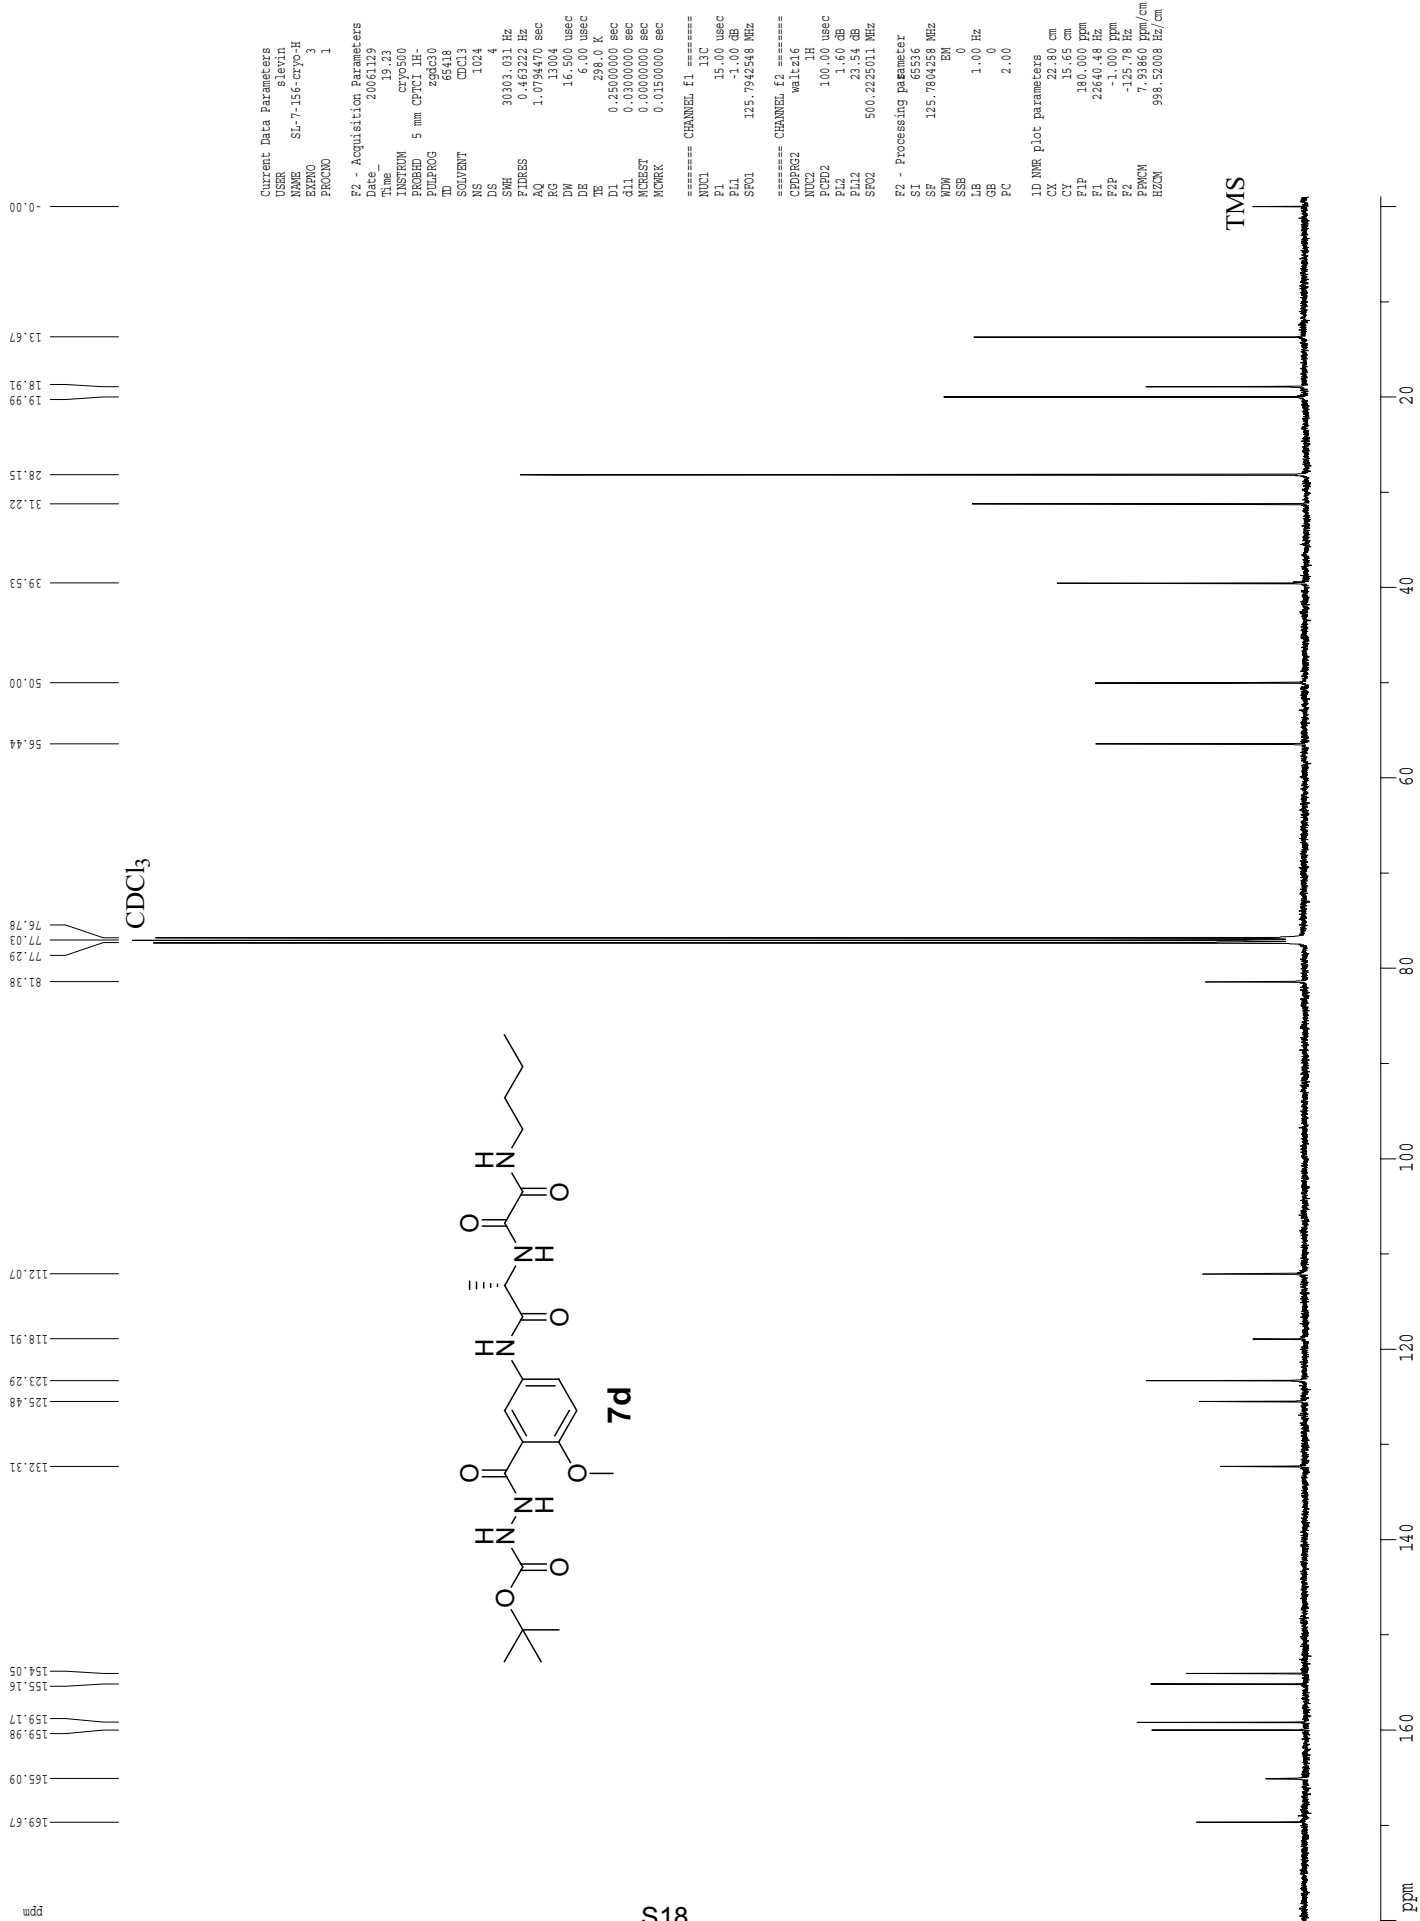

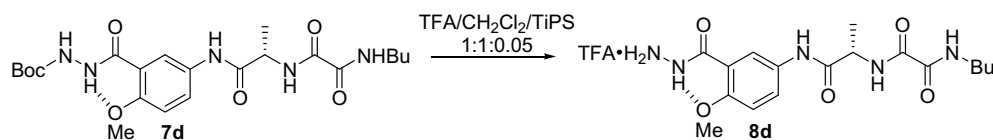

**Salt 8d.** Amide **7d** (3.70 g, 7.37 mmol) was dissolved in a mixture of dichloromethane (100 mL), trifluoroacetic acid (100 mL) and trisopropylsilane (0.5 mL). After 0.5 h, the solution was concentrated and the residue triturated with the diethyl ether to yield 3.55 g (92%) of salt **8d** as a white powder.

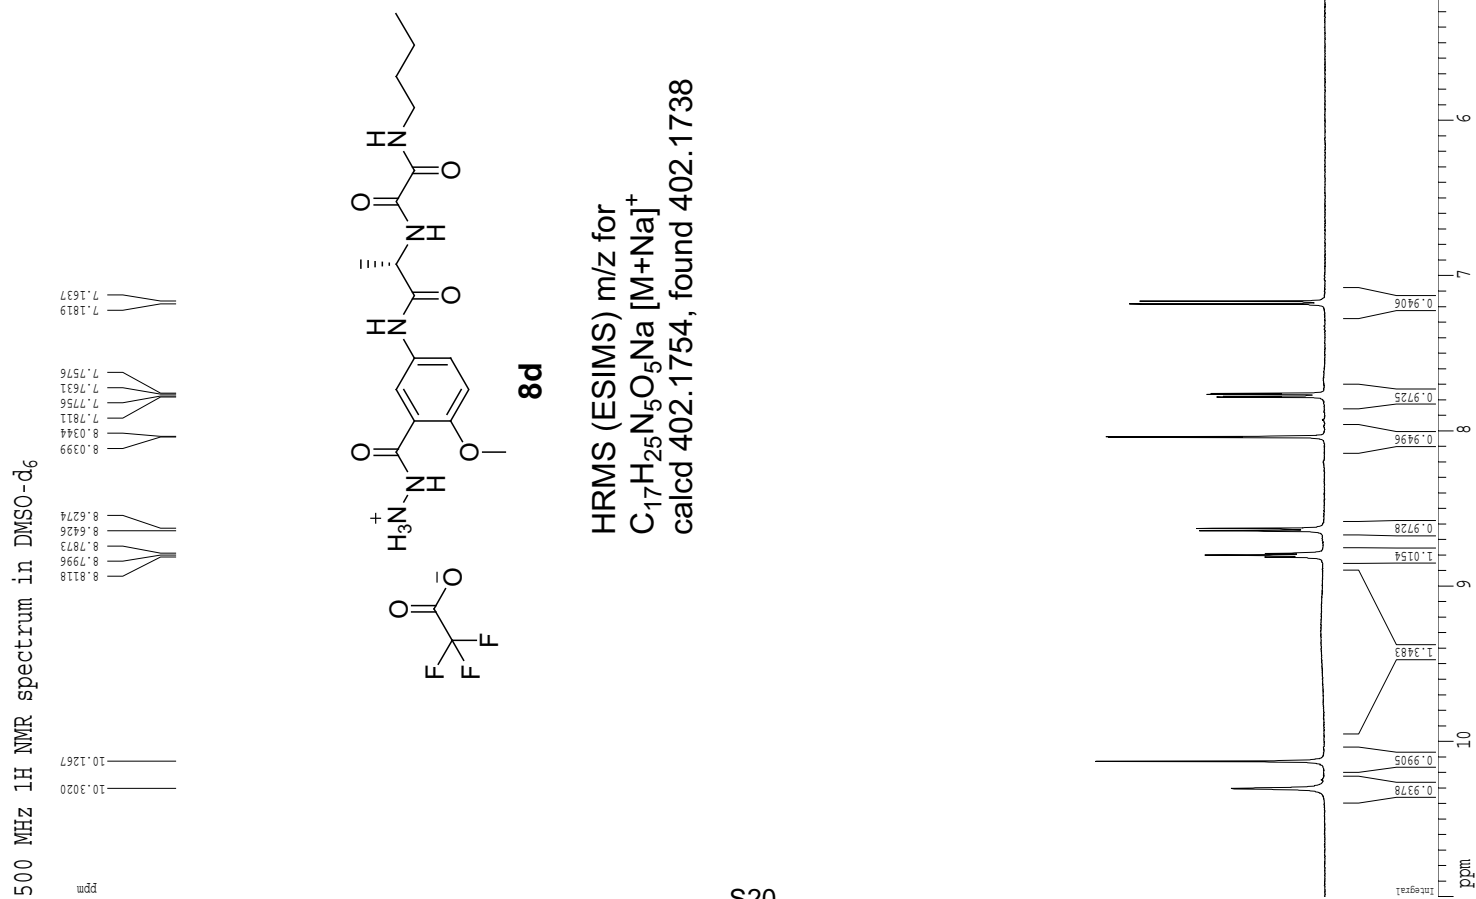

125 MHz <sup>13</sup>C spectrum in DMSO-d<sub>6</sub>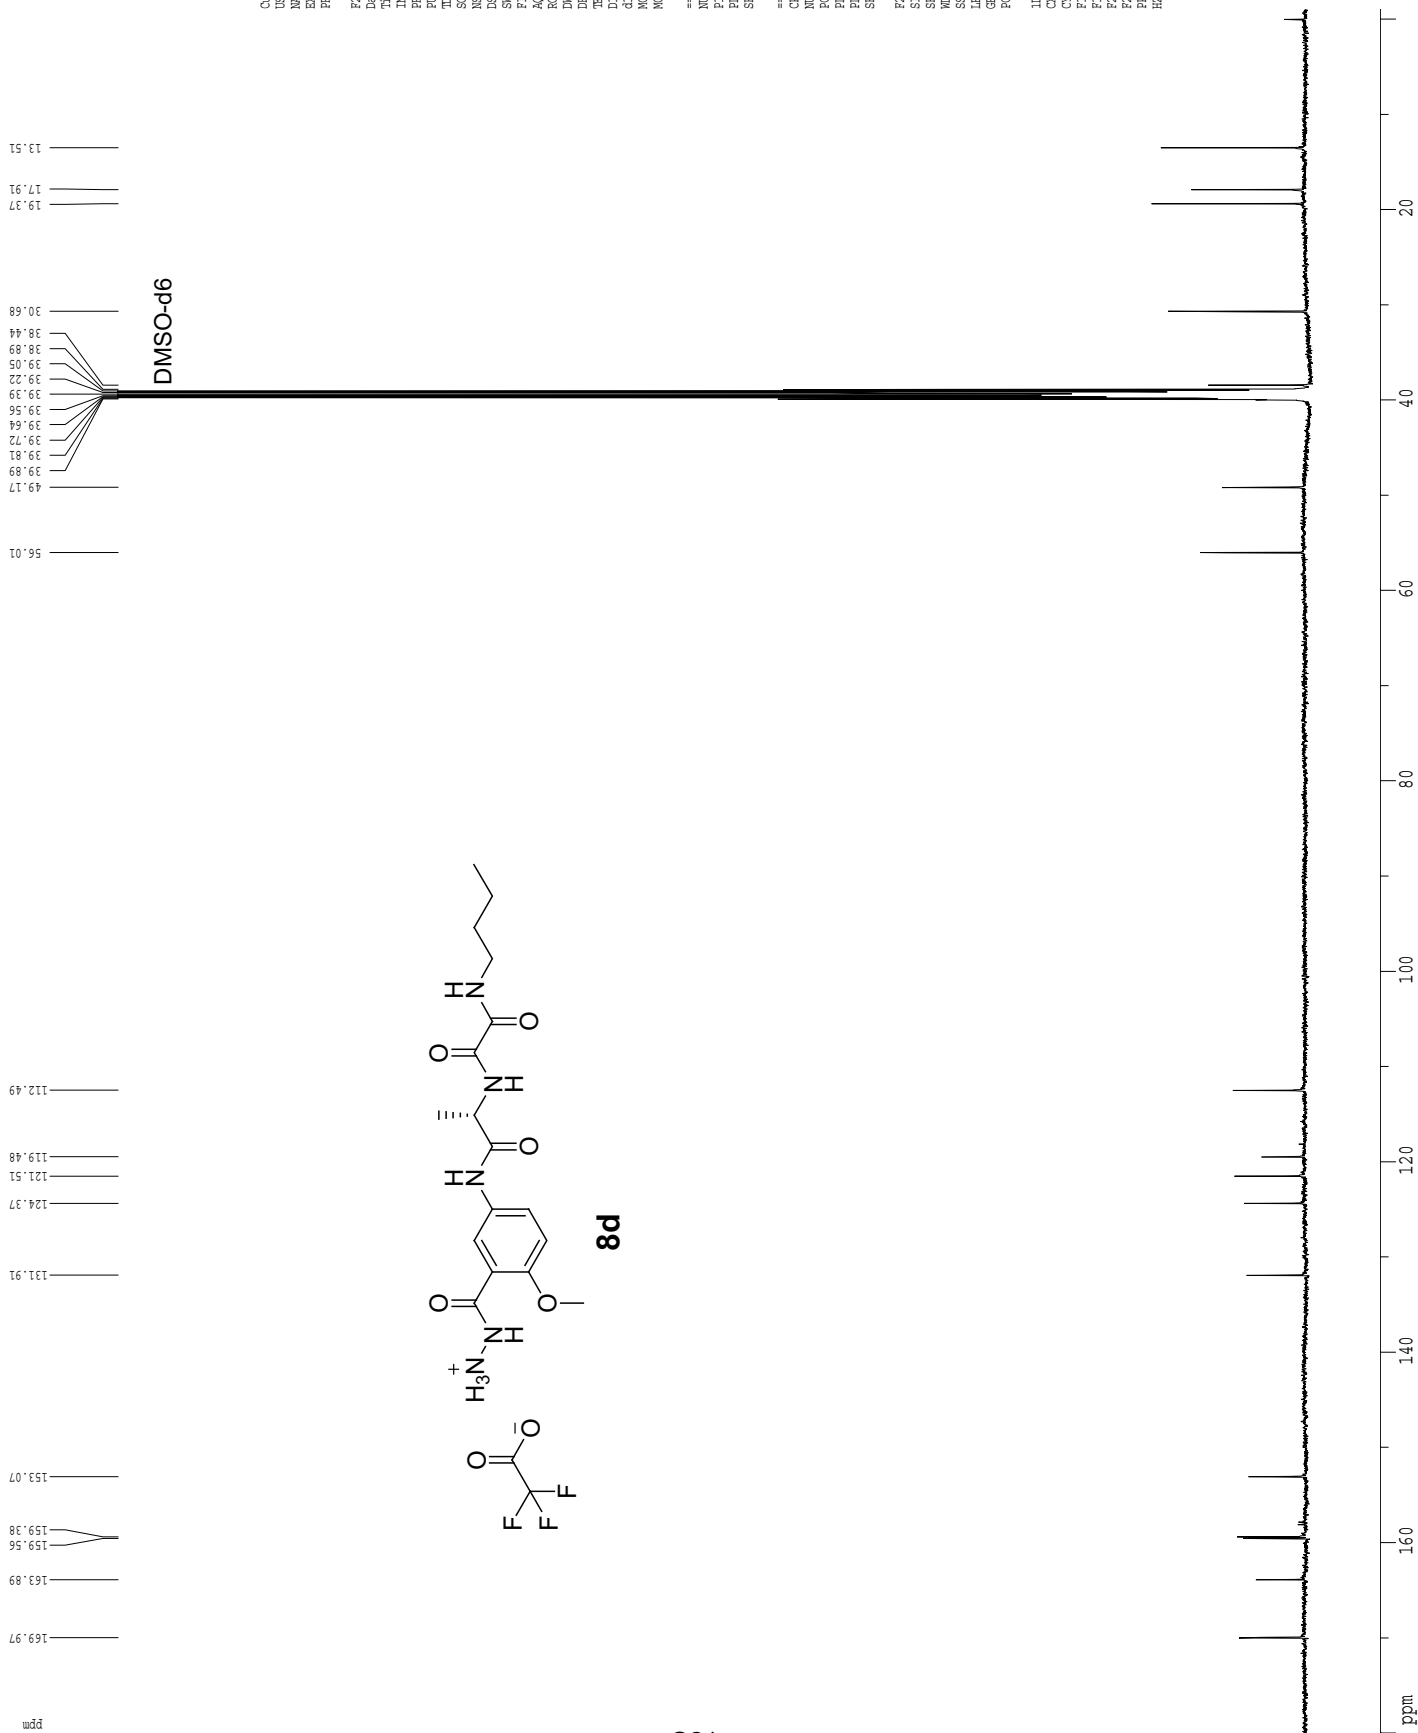

```

Current Data Parameters
  SSR          slevin
  NAME         SL-7-186
  EXPNO        4
  PROCNO       1

F2 - Acquisition Parameters
  Date_        20061223
  Time_        12.28
  INSTRUM      cryo500
  PROBHD       5 mm CPYCI 1H-
  PULPROG      zgpg30
  TD           65418
  SOLVENT      DMSO-d
  NS           3072
  DS           4
  SWH          30303.031 Hz
  FIDRES       0.463222 Hz
  AQ           1.0794635 sec
  RG           6502
  DW          16.500 usec
  DE           1.000 usec
  TE           298.0 K
  DL           0.25000000 sec
  d11          0.03000000 sec
  MCREST       0.00000000 sec
  MCWBK        0.01500000 sec

===== CHANNEL f1 =====
NUC1          13C
P1           15.00 usec
PL1          -1.00 dB
SFO1         125.7942548 MHz

===== CHANNEL f2 =====
CPDPRG2      waltz16
NUC2          1H
P2           100.00 usec
PL2          19.00 dB
PL12         21.54 dB
SFO2         500.2255011 MHz

F2 - Processing parameter
SI           65536
SF          125.7806246 MHz
WDW          EM
SSB          0
LB           2.00 Hz
GB           0
PC           2.00

1D NMR plot parameters
CX           22.80 cm
CY           50.00 cm
F1P         180.000 ppm
F1          22640.51 Hz
F2P         0.000 ppm
F2          -115.79 ppm
P1WDW       7.533860 Hz/cm
P1HZW       998.52167 Hz/cm

```

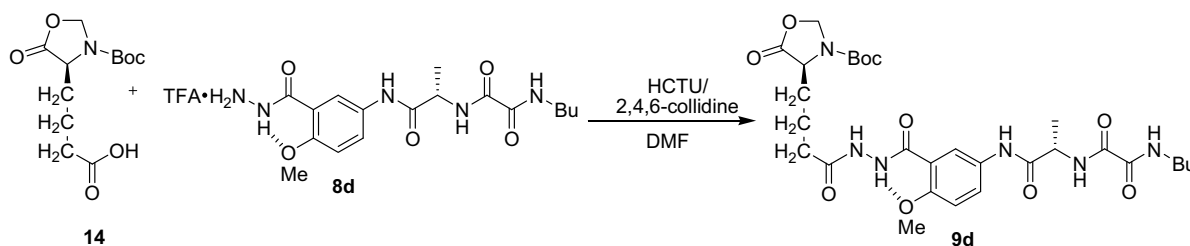

**Oxazolidinone 9d.** A solution of oxazolidinone **14**<sup>3,4</sup> (1.7 g, 6.1 mmol), HCTU (2.8 g, 6.7 mmol), and 2,4,6-collidine (2.0 mL, 15.2 mmol) in dimethylformamide (50 mL) was added to a solution of **8d** (3.0 g, 6.1 mmol) and 2,4,6-collidine (2.0 mL, 15 mmol) in dimethylformamide (50 mL). After 6 h, the reaction mixture, was poured into 700 mL ice-water, and the resulting precipitate was filtered and washed with water (200 mL). Upon drying, 3.20 g (83%) of reasonably pure (90% purity) compound **9d** was isolated. Further purification was achieved using column chromatography (4:1 chloroform:*i*-Pr-OH) yielding 2.1 g (54%)<sup>5</sup> of pure **9d** as a white solid.

<sup>3</sup> Olsen, R. K.; Ramasamy, K. *J. Org. Chem.* **1985**, *50*, 2264-2271.

<sup>4</sup> **14** was synthesized according to the procedure: Tantry, S. J.; Kantaraju.; Suresh Babu, V. V. *Tetrahedron Lett.* **2002**, *43*, 9461-9462.

<sup>5</sup> The low yield is due to compound loss while trying to purify **9d** with different solvent system.

500 MHz <sup>1</sup>H NMR Spectrum in CDCl<sub>3</sub>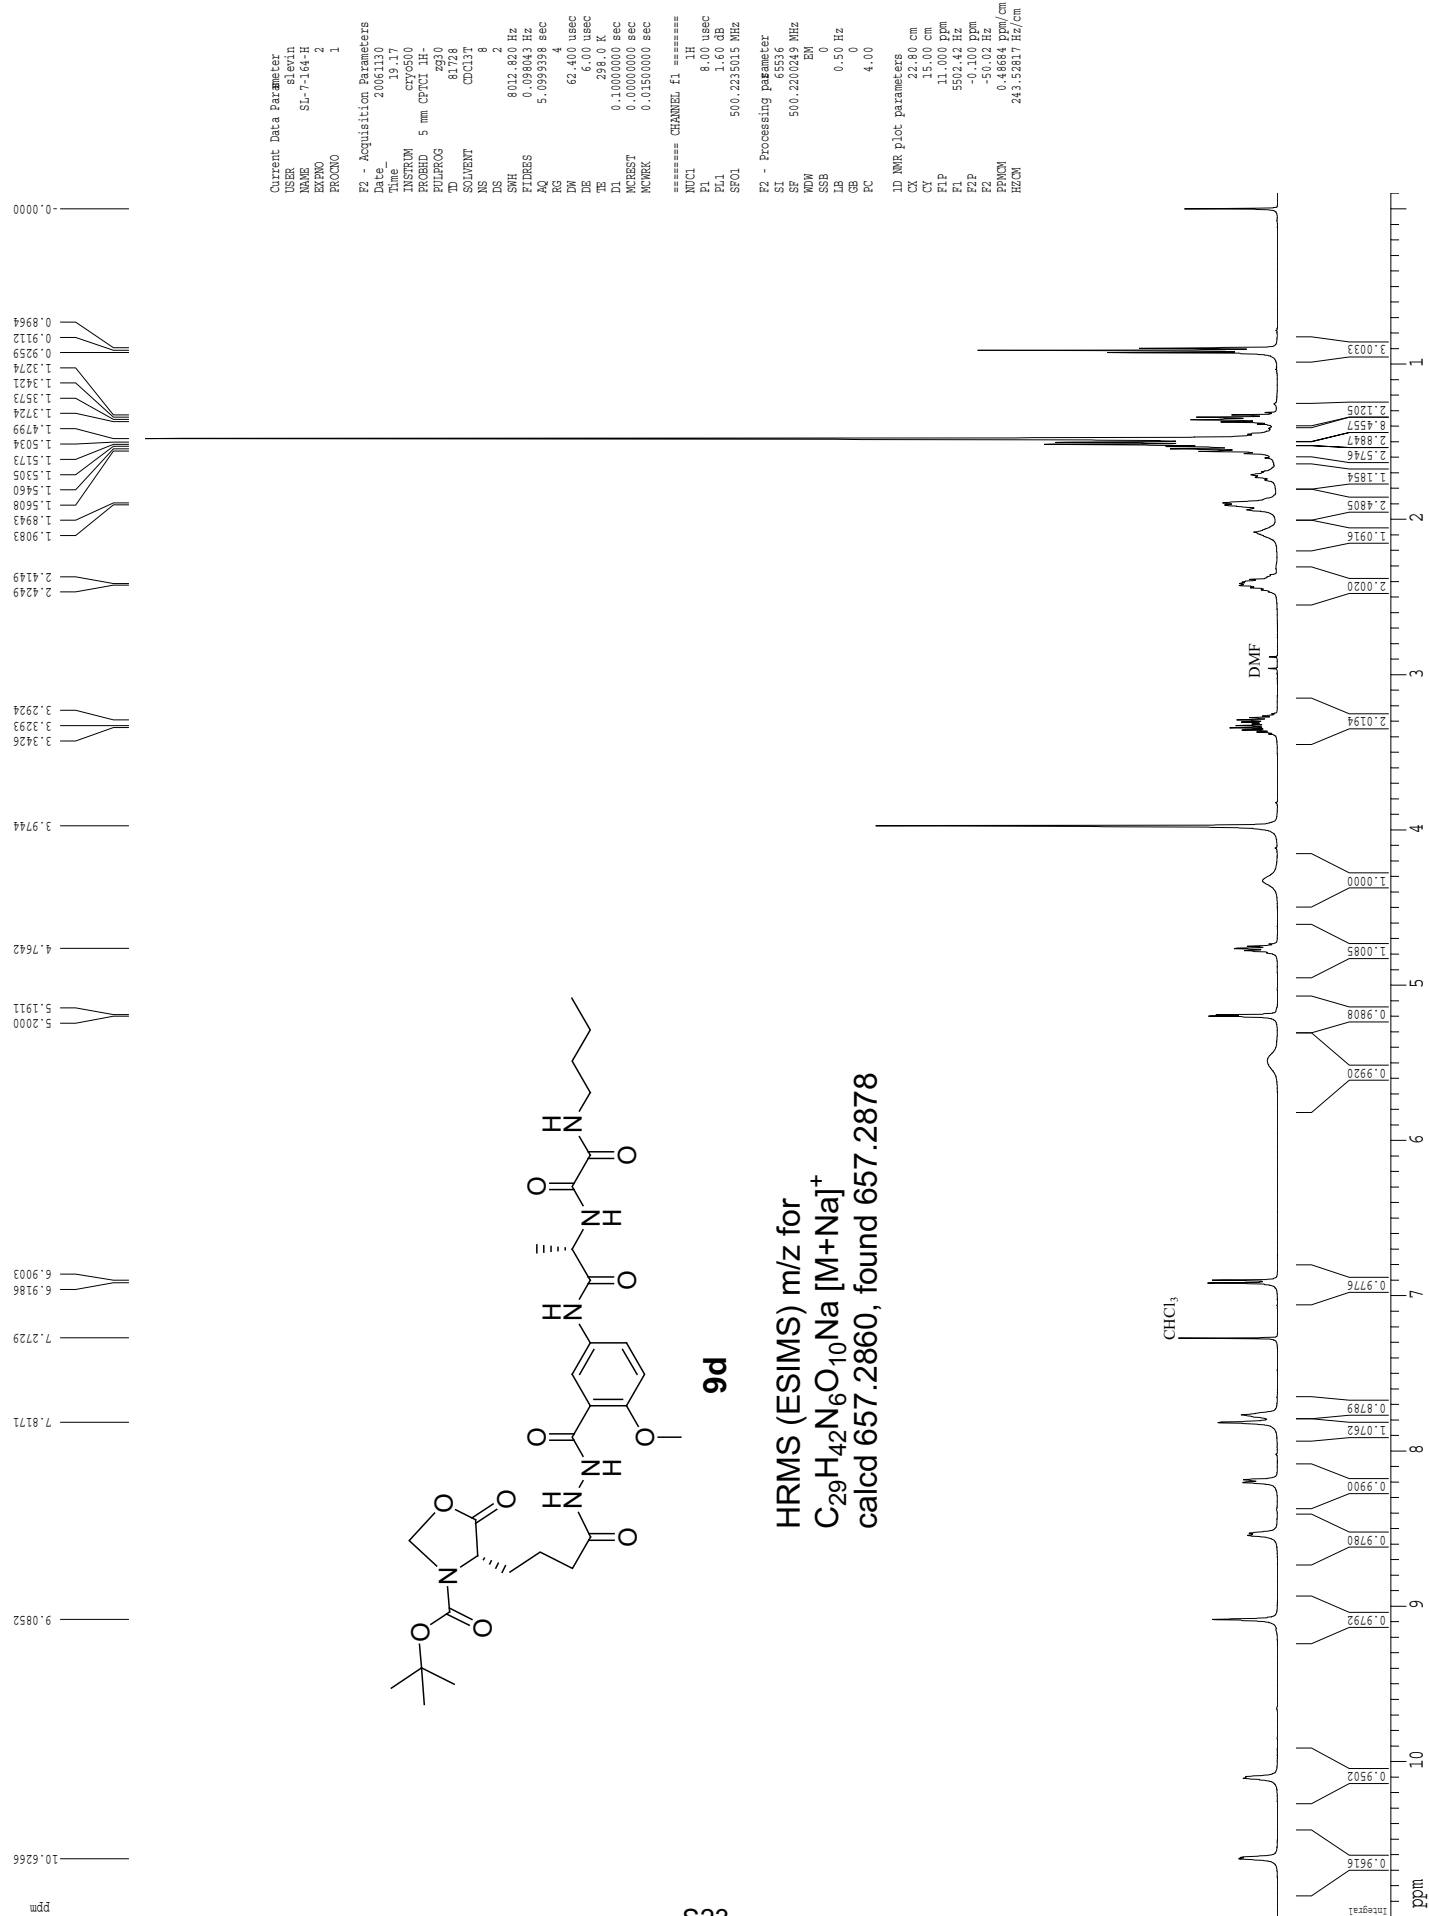

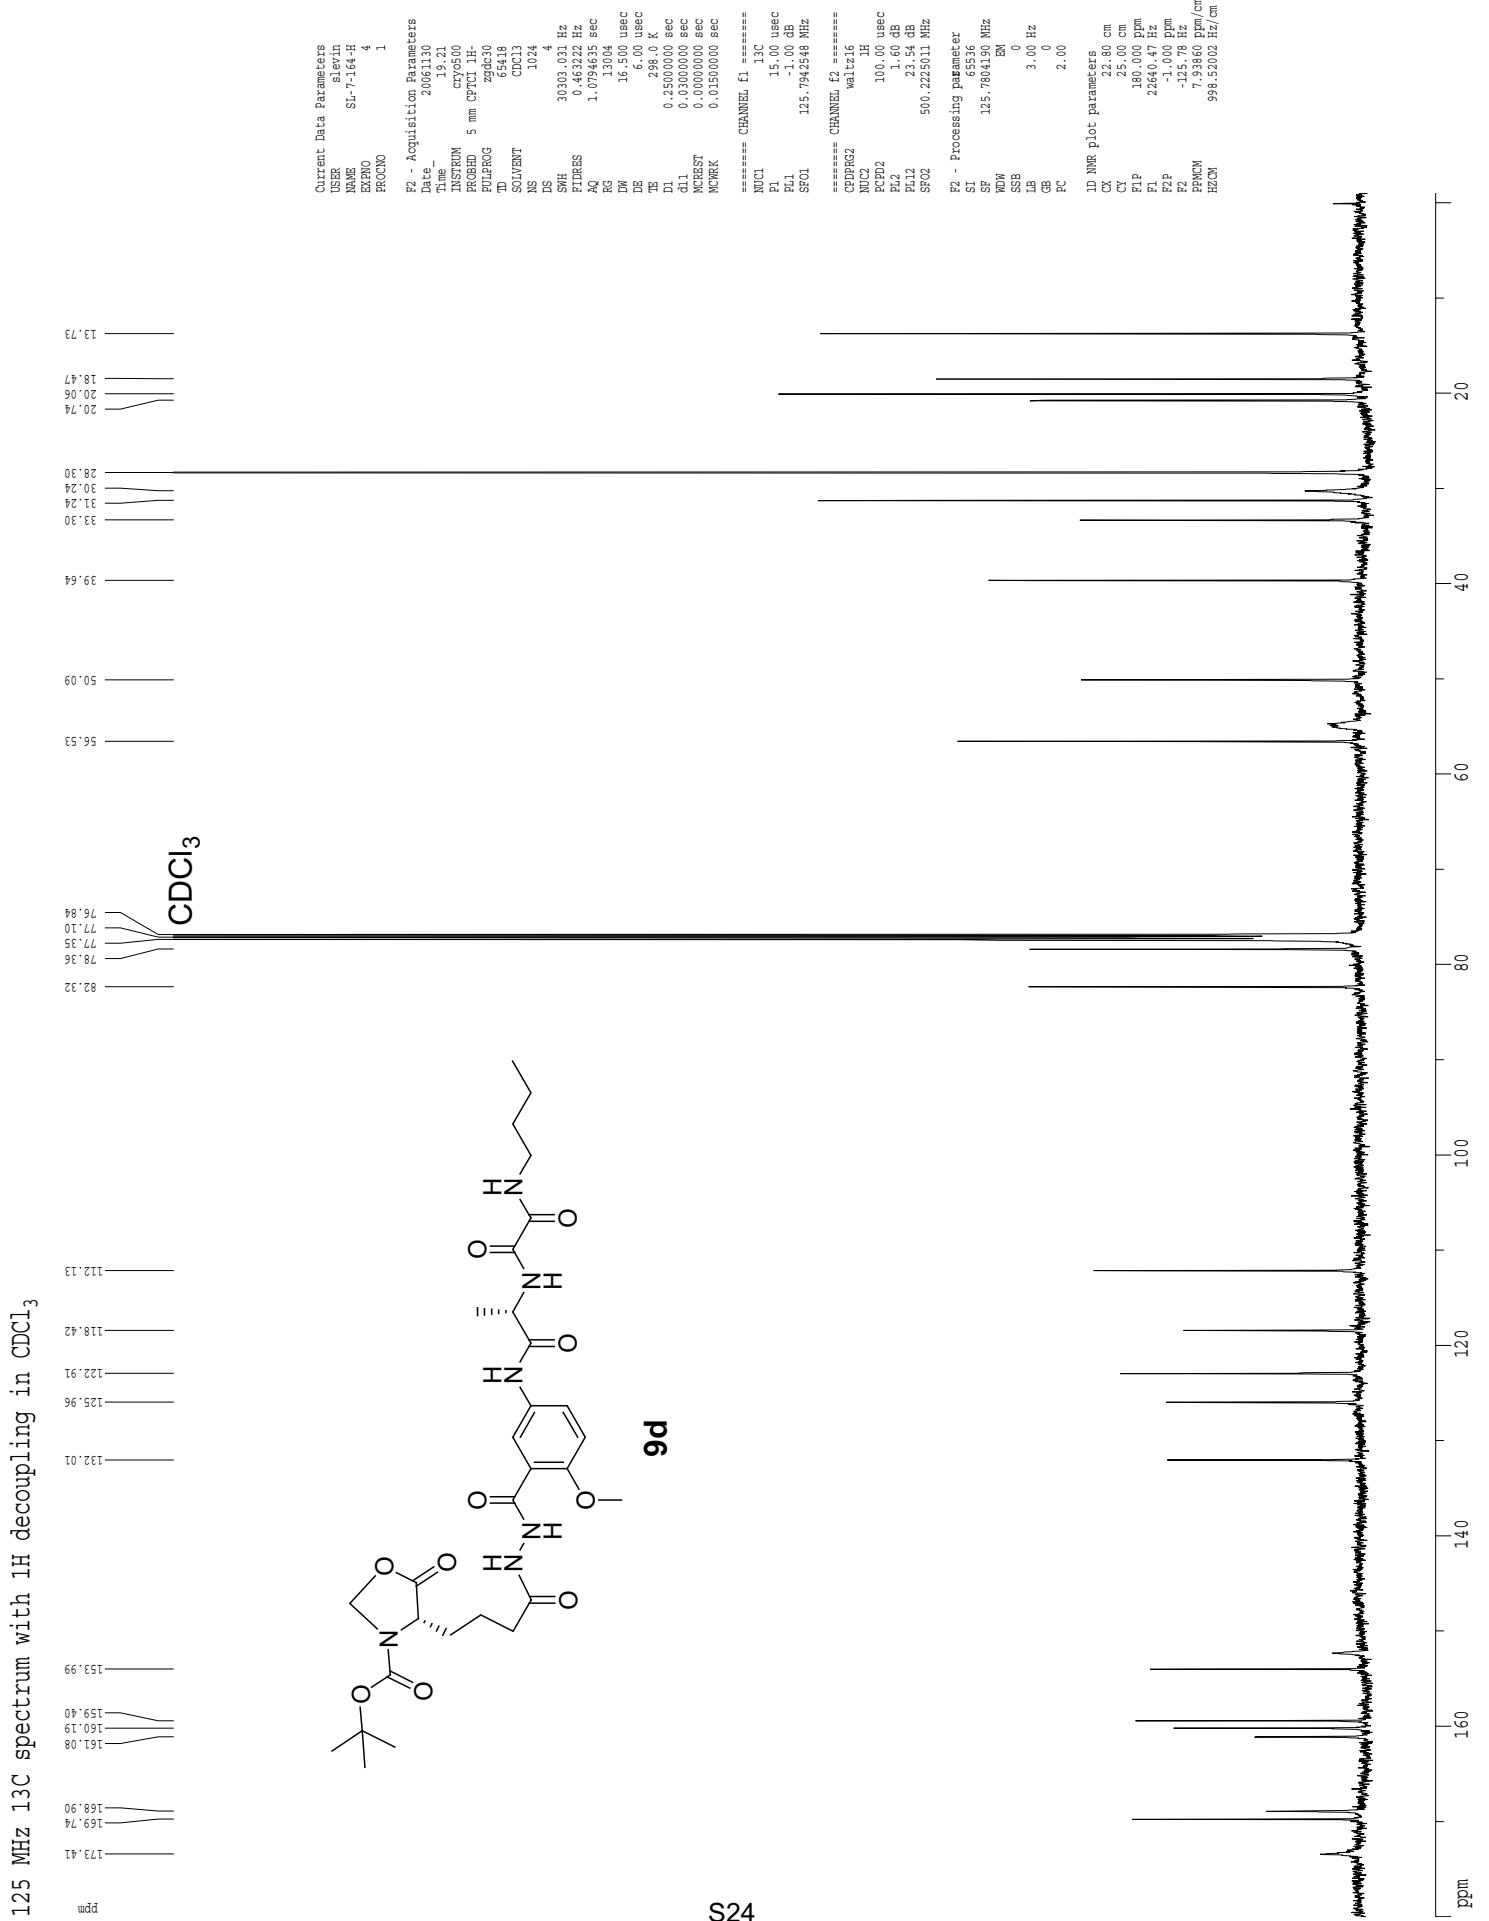



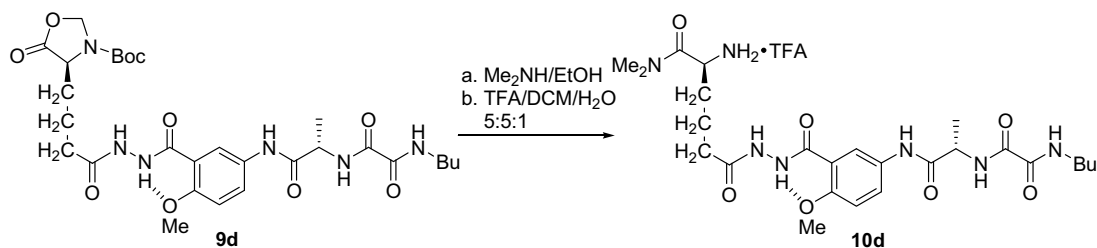

**Salt 10d.** A 5.6 M solution of dimethylamine in ethanol (15 mL, 84 mmol) was added to a stirred mixture of **9d** (1.5 g, 2.2 mmol) and ethanol (100 mL). The mixture was warmed to form a homogeneous solution, and the solution was stirred for 0.5 h and then concentrated under vacuum. The white residue was dissolved in a deprotection cocktail (100 mL, 5:5:1 TFA:DCM:H<sub>2</sub>O) and the resulting solution was left to react for 1 h. The solution was concentrated under vacuum and the residue was triturated with diethyl ether to afford 1.59 g (101%) of **10d** as a white powder, which was used in the next step without purification. An analytical sample was purified by RP-HPLC (C<sub>18</sub> column, gradient 20% CH<sub>3</sub>CN - 90% H<sub>2</sub>O to 90% CH<sub>3</sub>CN - 10% H<sub>2</sub>O).

500 MHz <sup>1</sup>H NMR spectrum in DMSO-d<sub>6</sub>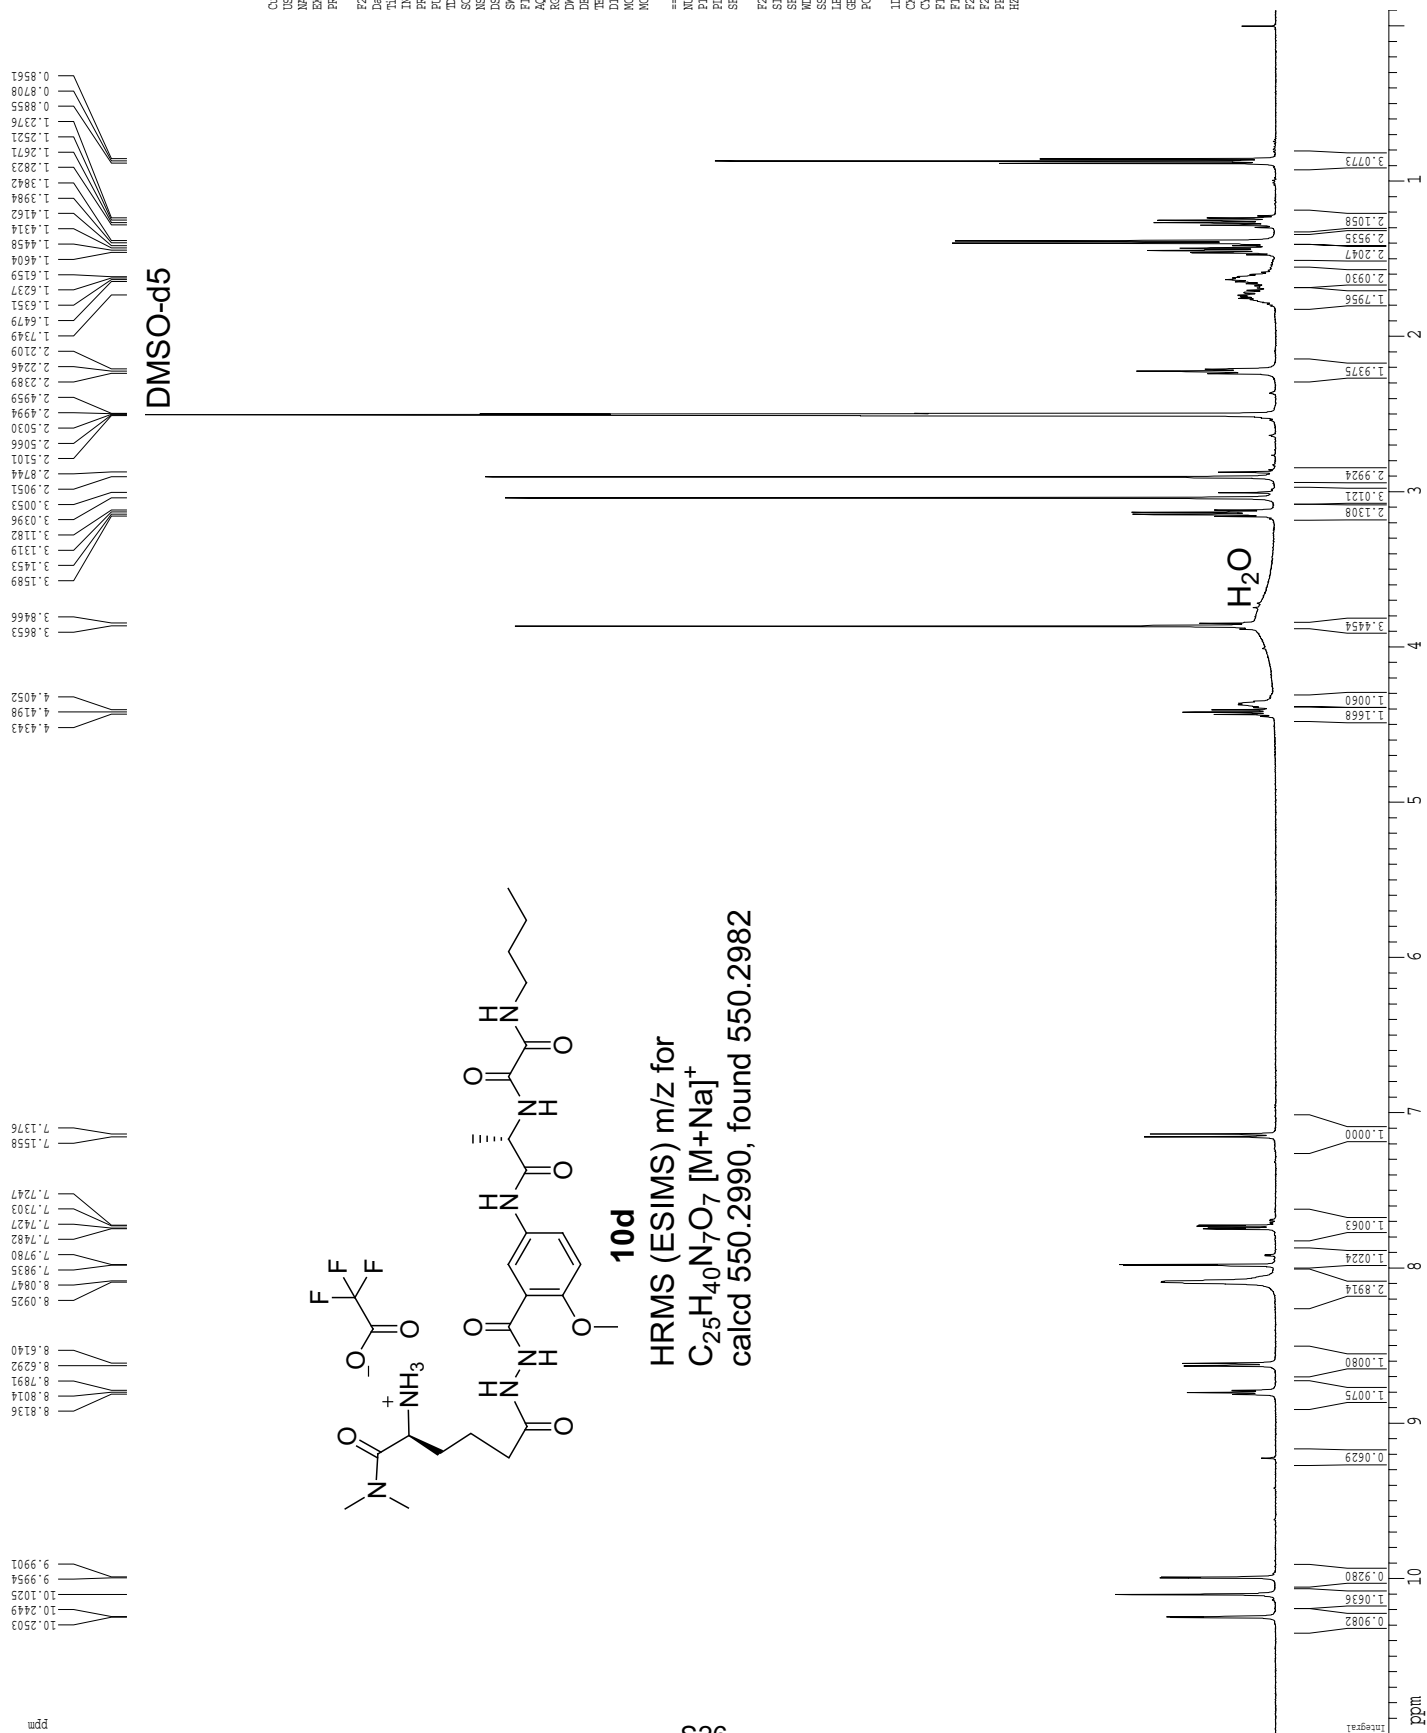

125 MHz <sup>13</sup>C NMR Spectrum in DMSO-d<sub>6</sub>

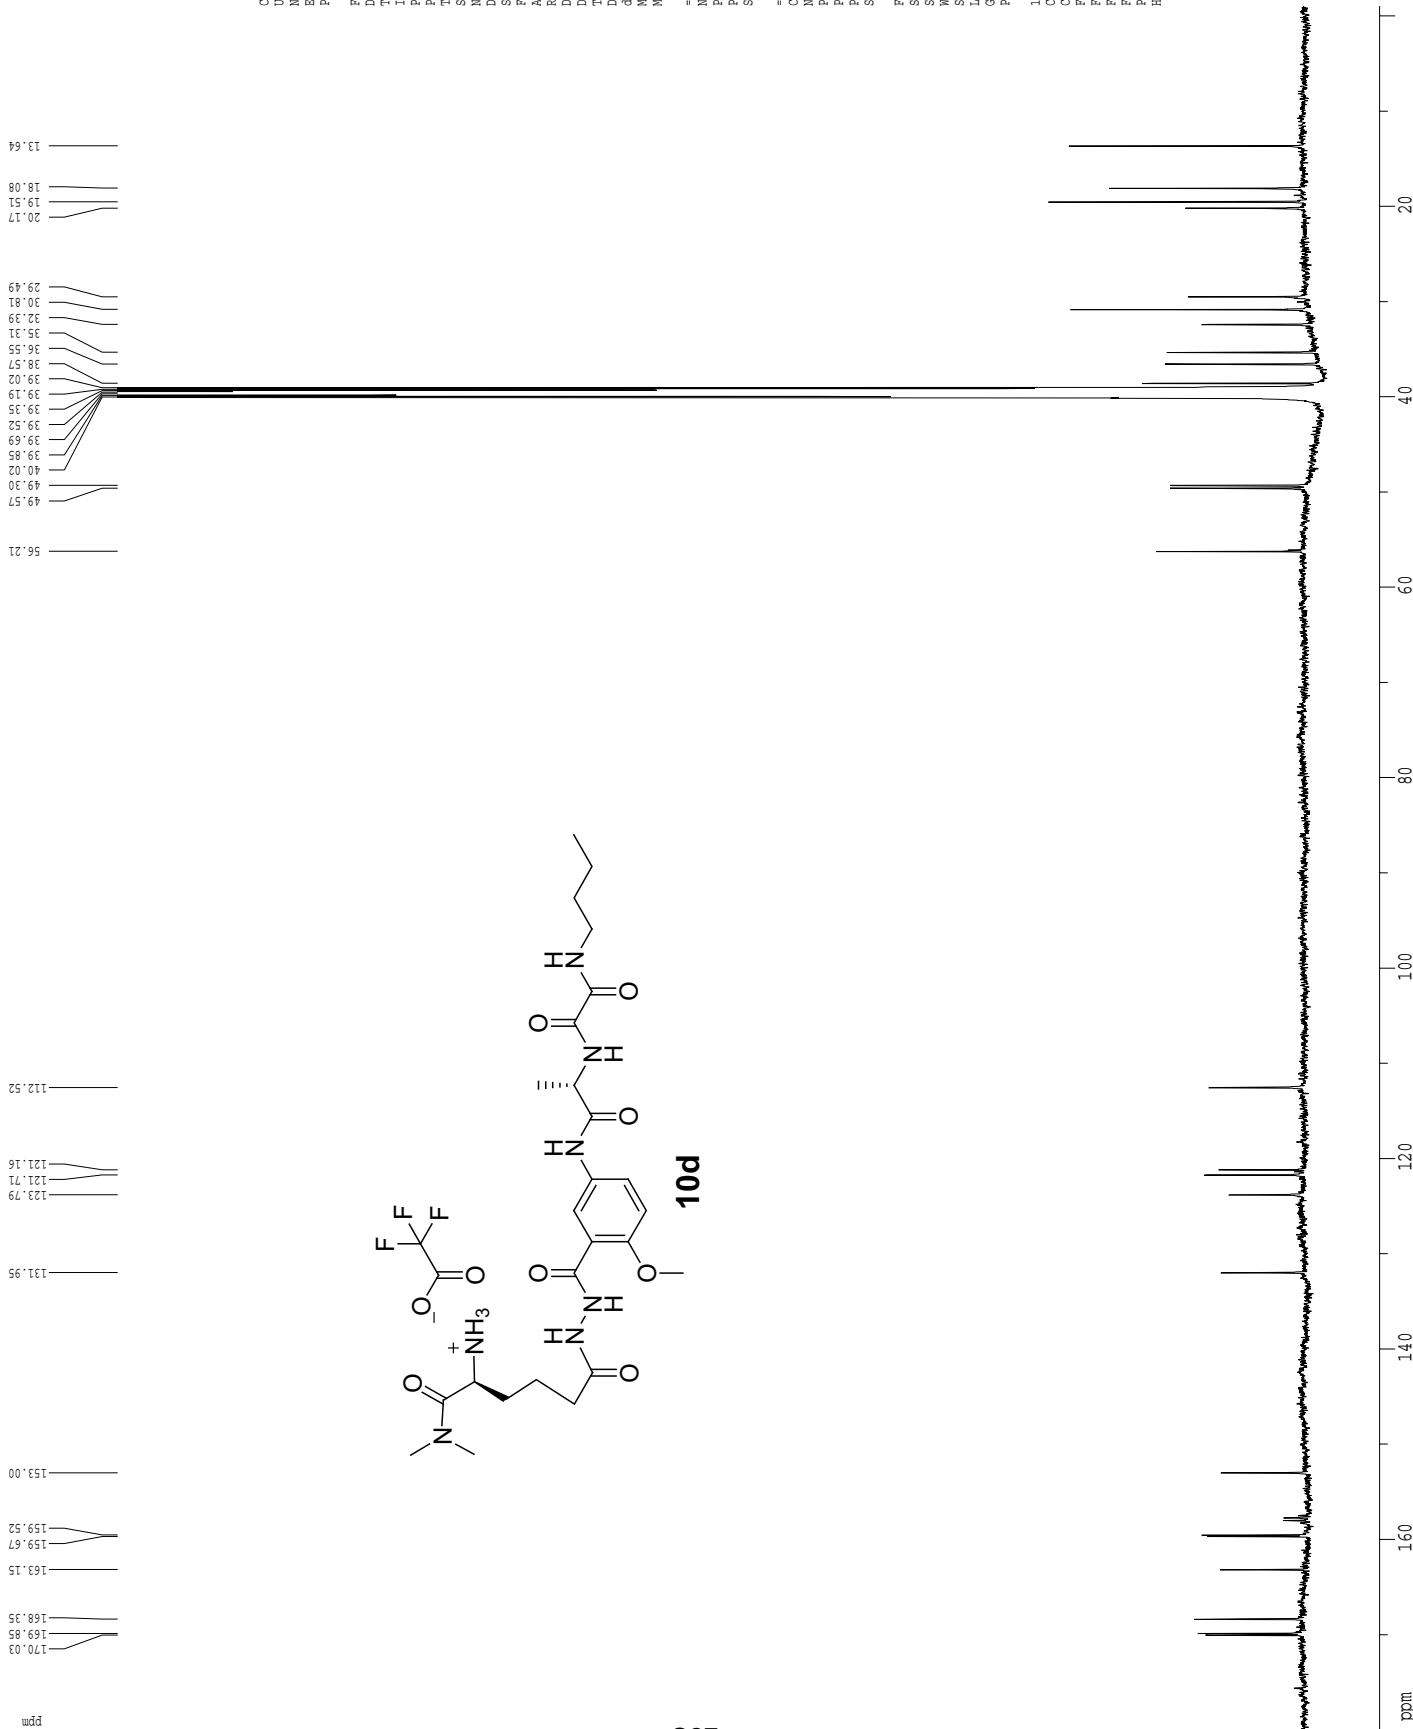

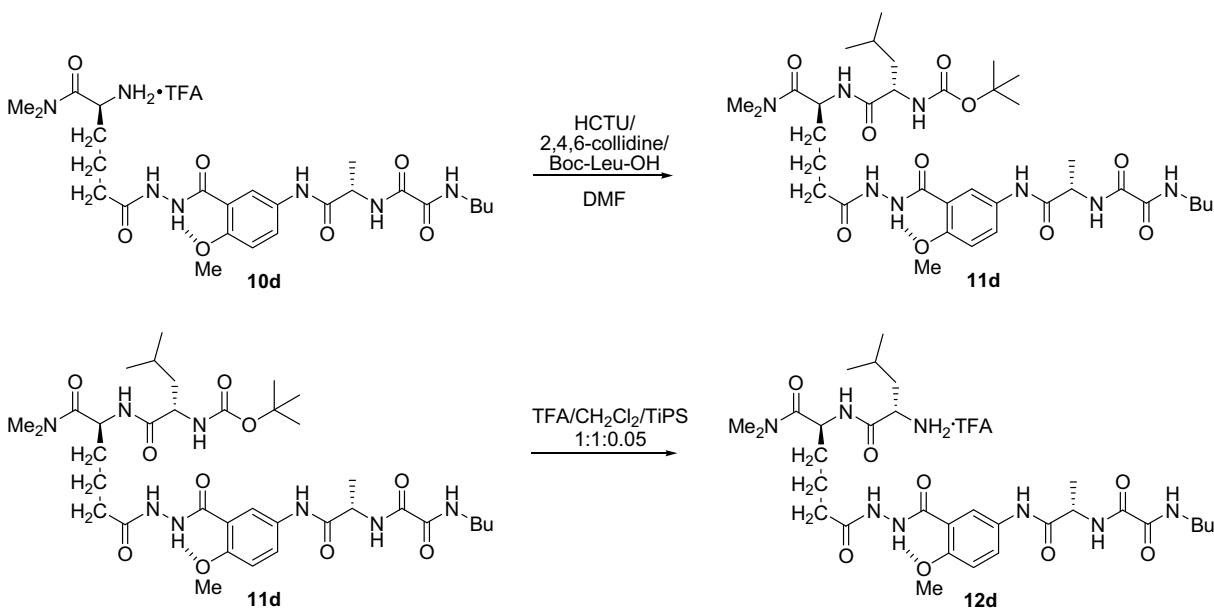

**Salt 12d.** A solution of **10d** (0.52 g, 0.80 mmol), HCTU (0.39 g, 0.94 mmol), and 2,4,6-collidine (1.0 mL, 7.6 mmol) in DMF (50 mL) was stirred at room temperature for 1.5 h and then concentrated under vacuum to form a brown oil. The oil was triturated with water and dried under vacuum. Purification by column chromatography (9:1 chloroform-isopropanol) yielded 0.33 g (55%) of **11d** as a white solid, which was deprotected for 0.5 h with cleavage cocktail (100 mL, 1:1:0.05 TFA-CH<sub>2</sub>Cl<sub>2</sub>-triisopropylsilane). The solution was concentrated under vacuum and the residue triturated with diethyl ether to afford 0.25 g (76%) of **12d** as a white solid. The compound was used in the next step without further purification.

500 MHz 1H Spectrum in DMSO-d6

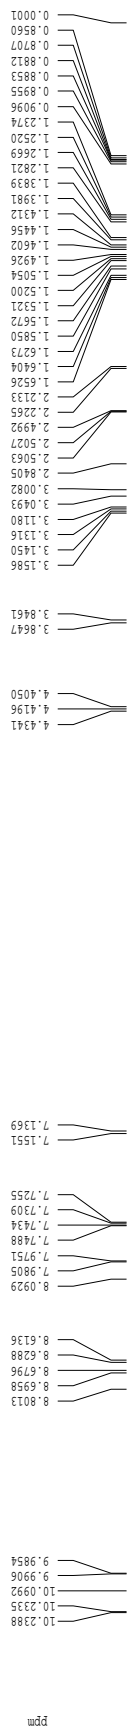

DMSO-d5

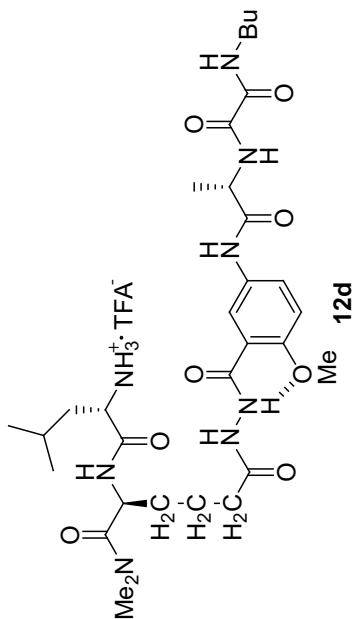

HRMS (ESIMS) m/z for  
 $C_{31}H_{51}N_8O_8 [M+H]^+$   
 calcd 663.3830, found 663.3820

S29

```

Current Data Parameter
USER          sLevin
NAME          SI-7-200-DEBOC-H
EXPNO        1
PROCNO       1

F2 - Acquisition Parameters
Date_         20070106
Time_        17.52
INSTRUM      cryco50
PROBHD       5 mm CPTCI 1H
PULPROG      zg30
TD           81728
SOLVENT      DMSO
NS           8
DS           2
SWH          8012.823 Hz
AQ           0.18883 Hz
RG           5.0990776 sec
FIDRES       62.400 usec
AQRES        298.0 K
DE           6.00 usec
TE           6.00 usec
D1           0.10000000 sec
MCREST       0.00000000 sec
MCWRK       0.01500000 sec

===== CHANNEL f1 =====
NUC1          1H
P1           8.00 usec
PD1          1.60 dB
SFO1         500.2335015 MHz

F2 - Processing parameter
SI           65536
SF          500.2200117 MHz
WDW          EM
SSB          0
LB           0.30 Hz
GB           0
PC           4.00

JD NMR Plot parameters
CT          22.80 cm
SI          1500.00 cm
F1P         5502.43 Hz
F2P         -0.1000 ppm
F2          -50.02 Hz
PPMCH      0.48684 ppm/cm
HZCN       243.52815 Hz/cm
    
```

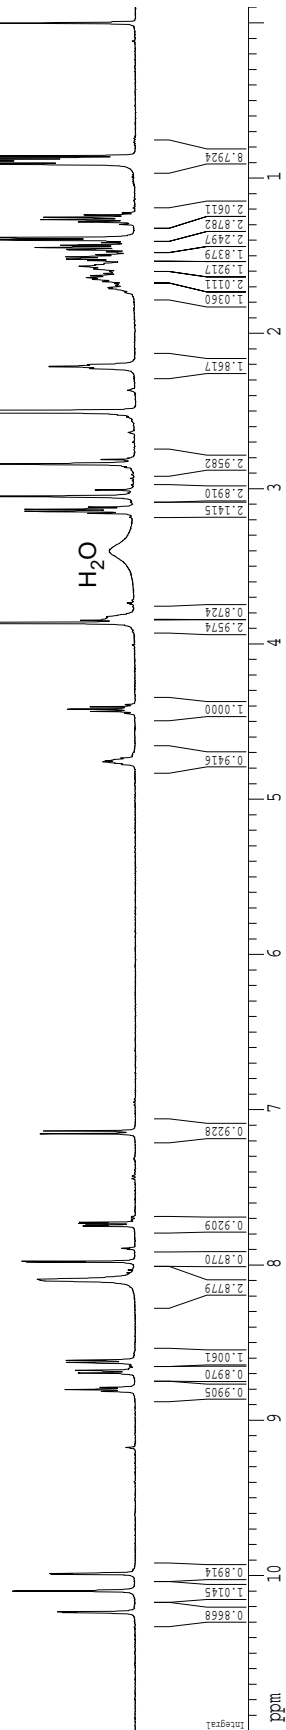

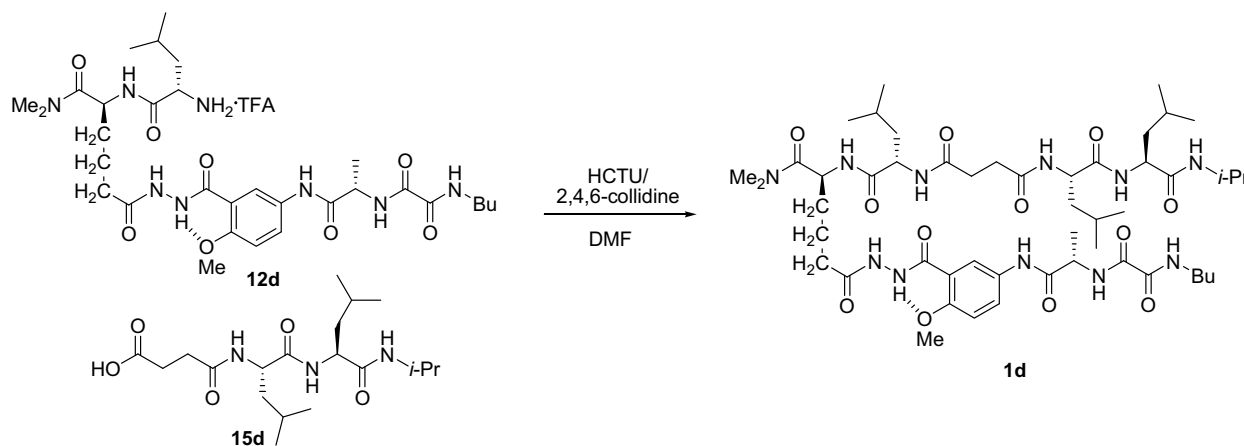

**Artificial  $\beta$ -sheet 1d.** A mixture of **12d** (0.070 g, 0.090 mmol), **15** (0.035 g, 0.091 mmol) and 2,4,6-collidine (0.12 mL, 0.91 mmol) in dimethylformamide (10 mL) was allowed to react for 3.5 h at room temperature. The solution was concentrated under vacuum and residue was partitioned between dichloromethane (50 mL) and water (50 mL). The water layer was washed extra dichloromethane (50 mL). The organic layers were combined and concentrated to give 0.060g (64%) of **1d** as a white powder, which was further purified by the recrystallization from acetonitrile (2 times), to yield 0.030 g (32%) of **1d** as a white powder.

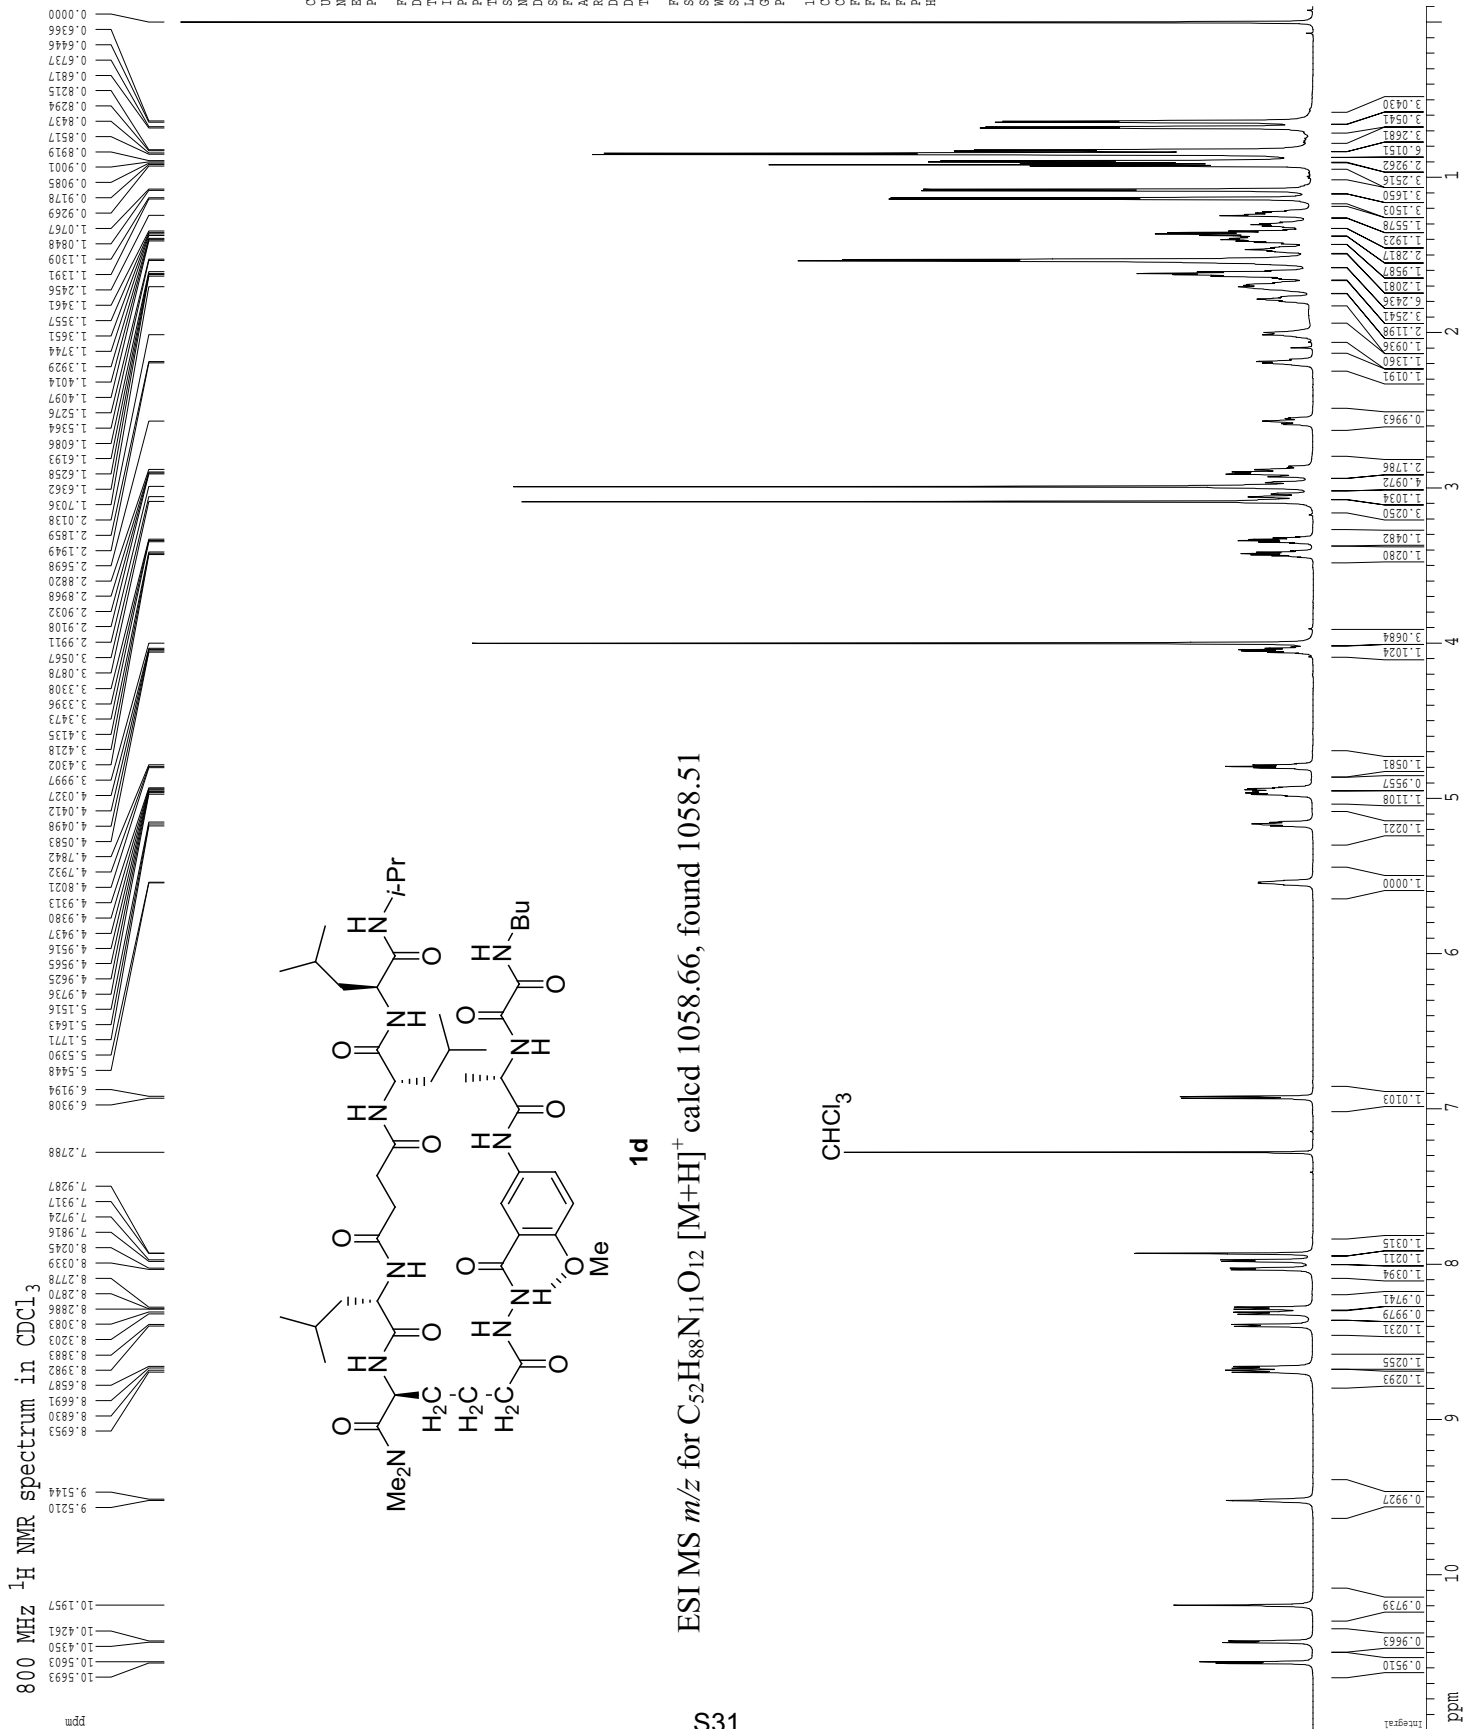

Spectroscopic DATA for the compound **1a**  
(10 mM, CDCl<sub>3</sub> 268K)

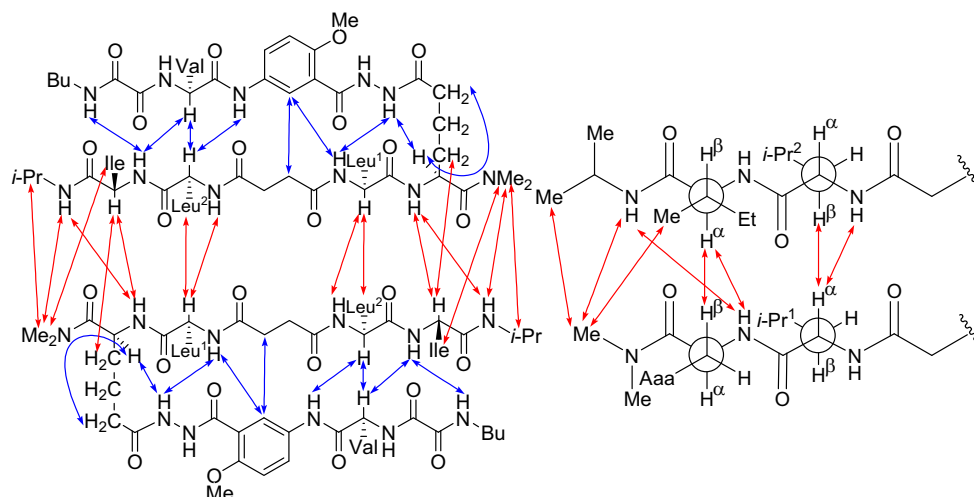

Key NOEs assigned as *intermolecular* are represented with red arrows  
Key NOEs assigned as *intramolecular* are represented with blue arrows

Key data for amino acids.

| Amino acid                        | H <sub>α</sub> Shift ppm | NH Shift ppm | <sup>3</sup> J <sub>NHα</sub> Hz |
|-----------------------------------|--------------------------|--------------|----------------------------------|
| Aaa                               | 5.15                     | 8.57         | 8.4                              |
| R <sub>1</sub> = Leu <sup>1</sup> | 5.51                     | 8.52         | 7.7                              |
| R <sub>2</sub> = Leu <sup>2</sup> | 5.09                     | 8.24         | 9.7                              |
| R <sub>3</sub> = Ile              | 4.73                     | 8.70         | 10.1                             |
| R <sub>4</sub> = Val              | 4.49                     | 8.05         | 9.4                              |

Amino adipic acid (Aaa) δ proton resonances.

*pro-R*: 2.92 ppm, t, (*overlap*)

*pro-S*: 2.18 ppm, td, (*J*<sub>1</sub> = 11.5 Hz; *J*<sub>2</sub> = 7.0 Hz)

anisotropy = 0.74 ppm

Key data for other NH protons.

| Proton          | NH Shift ppm | <i>J</i> Hz |
|-----------------|--------------|-------------|
| Ar-NH           | 10.29        | -           |
| Hydrazide Ar    | 10.67        | 7.7         |
| Hydrazide Aaa   | 10.49        | 7.7         |
| Bu-NH           | 9.62         | 5.5         |
| <i>i</i> -Pr-NH | 8.00         | 8.1         |

ESI MS *m/z* for C<sub>52</sub>H<sub>88</sub>N<sub>11</sub>O<sub>12</sub> [M+H]<sup>+</sup> calcd 1058.66, found 1058.51.



800 MHz <sup>1</sup>H NMR Spectrum of **1a** in CDCl<sub>3</sub>

268 K (-5 °C), 10 mM

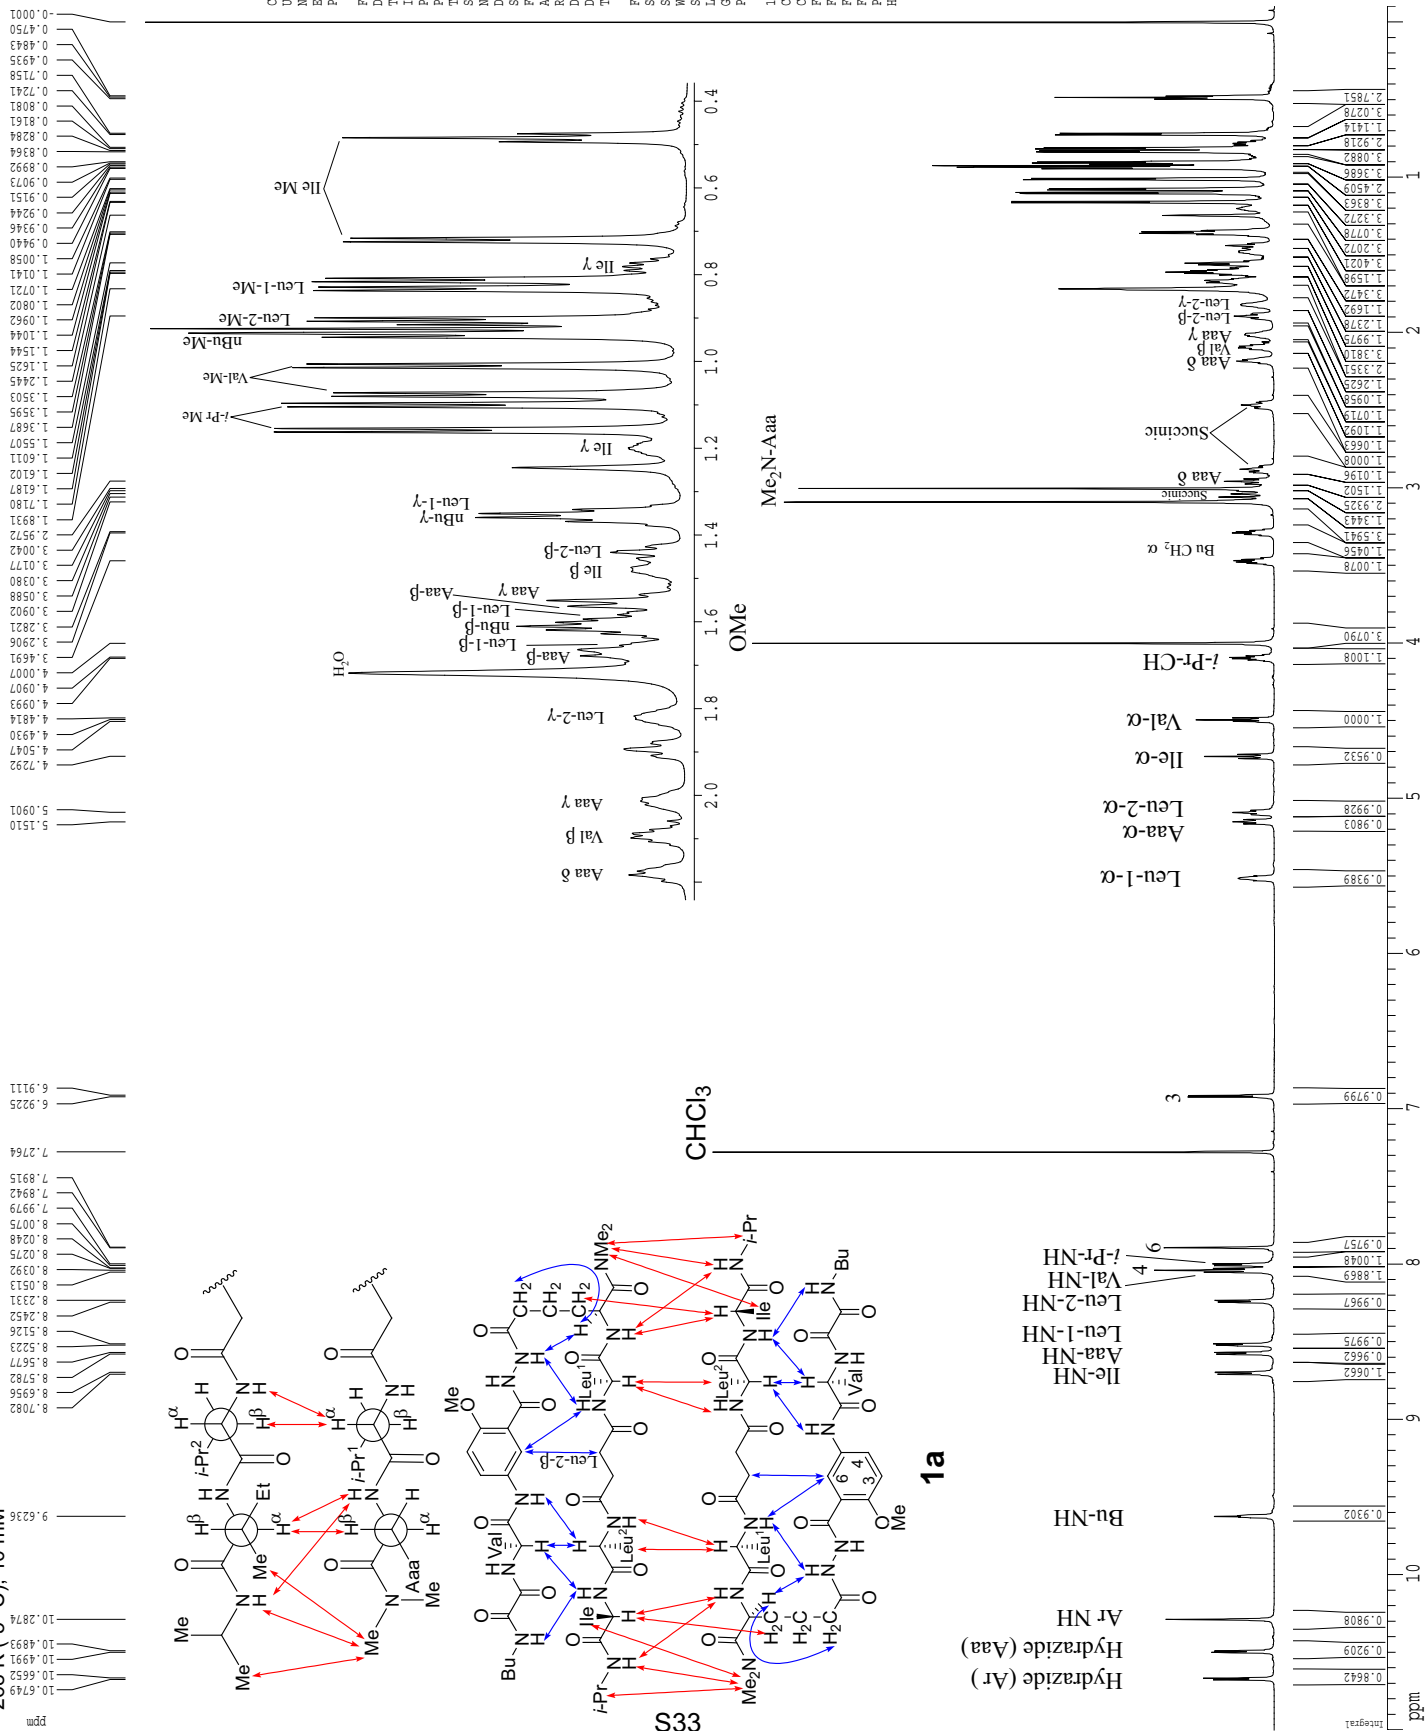

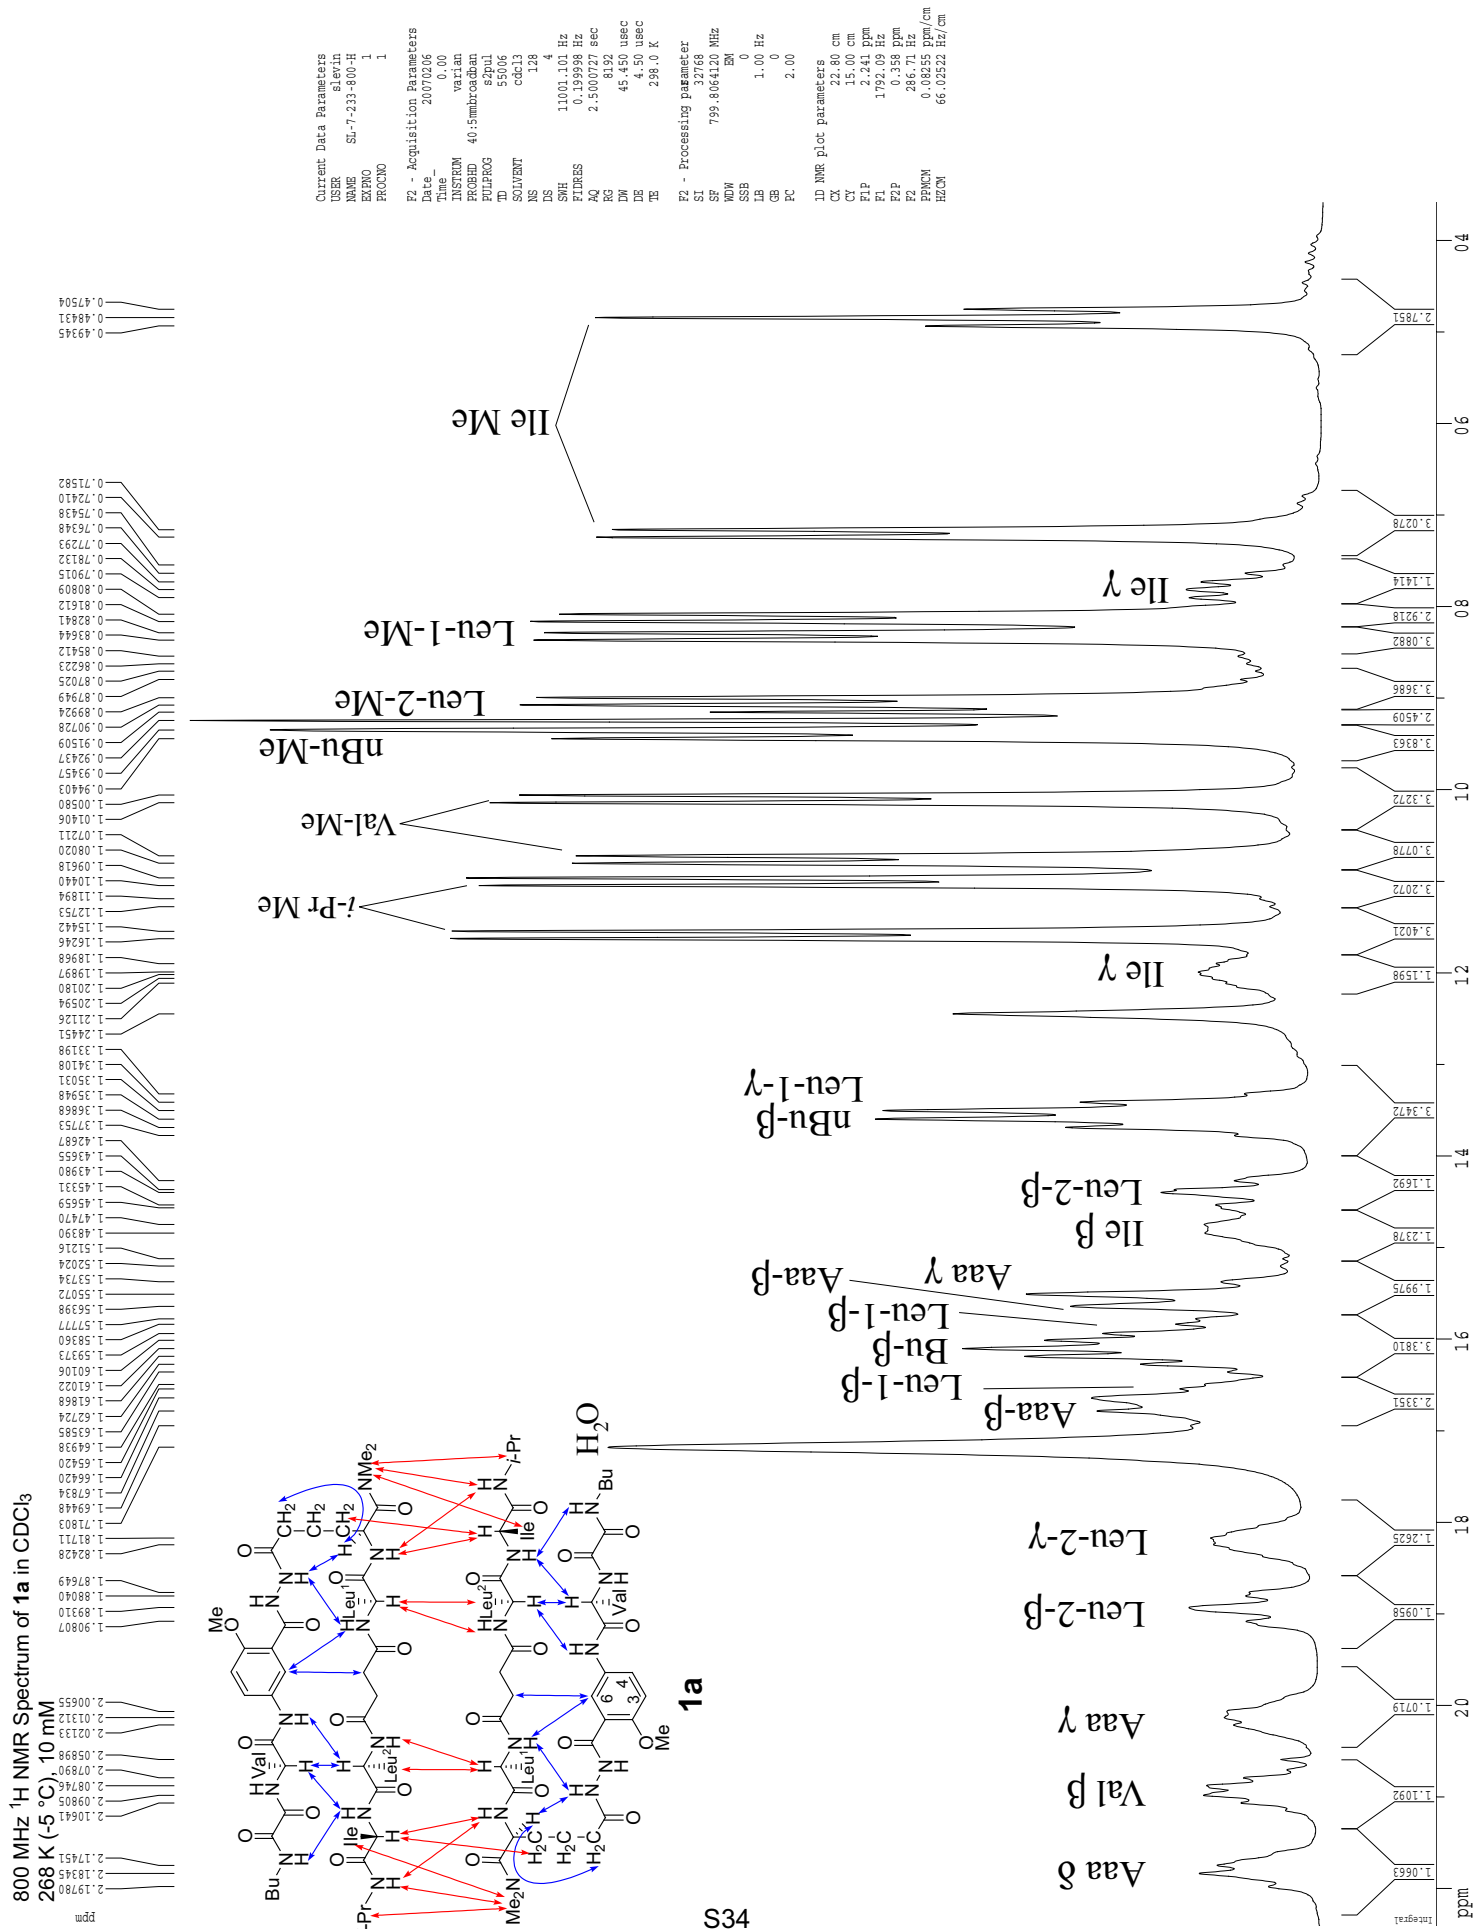

Supporting Information

Current Data Parameters  
 USER slevin  
 NAME SL-7-233-800-H  
 EXPNO 2  
 PROCNO 1

F2 - Acquisition Parameters

Date\_ 20070206  
 Time 0.00  
 INSTRUM varian  
 PROBHD 40:5mmroadban  
 PULPROG zgpg30  
 TD 4096  
 SOLVENT cdcl3  
 NS 8  
 DS 64  
 SWH 11001.101 Hz  
 FIDRES 2.685816 Hz  
 AQ 0.1843700 sec  
 RG 4096  
 DW 45.450 usec  
 DE 231.43 usec  
 TE 268.5 K

F1 - Acquisition Parameters

ND0 1  
 TD 512  
 SFO1 799.8107 MHz  
 FIDRES 21.486525 Hz  
 SW 13.755 ppm  
 FhMODE undefined

F2 - Processing parameters

SI 2048  
 SF 799.8064119 MHz  
 WDW SINE  
 SSB 0  
 LB 0.00 Hz  
 GB 0  
 PC 1.40

F1 - Processing parameters

SI 512  
 MC2 QF  
 SF 799.8064119 MHz  
 WDW SINE  
 SSB 0  
 LB 0.00 Hz  
 GB 0

S. Levin and J. S. Nowick

2D NMR plot parameters

CX2 15.00 cm  
 CX1 15.00 cm  
 F2PLO 11.000 ppm  
 F2LO 8797.87 Hz  
 F2PHI -0.100 ppm  
 F2HI -79.98 Hz  
 F1PLO 11.000 ppm  
 F1LO 8797.87 Hz  
 F1PHI -0.100 ppm  
 F1HI -79.98 Hz  
 F2PPMCM 0.74000 ppm/cm  
 F2HZCM 591.85669 Hz/cm  
 F1PPMCM 0.74000 ppm/cm  
 F1HZCM 591.85669 Hz/cm

800 MHz COSY Spectrum of **1a** in CDCl<sub>3</sub>  
 268 K (-5 °C), 10 mM

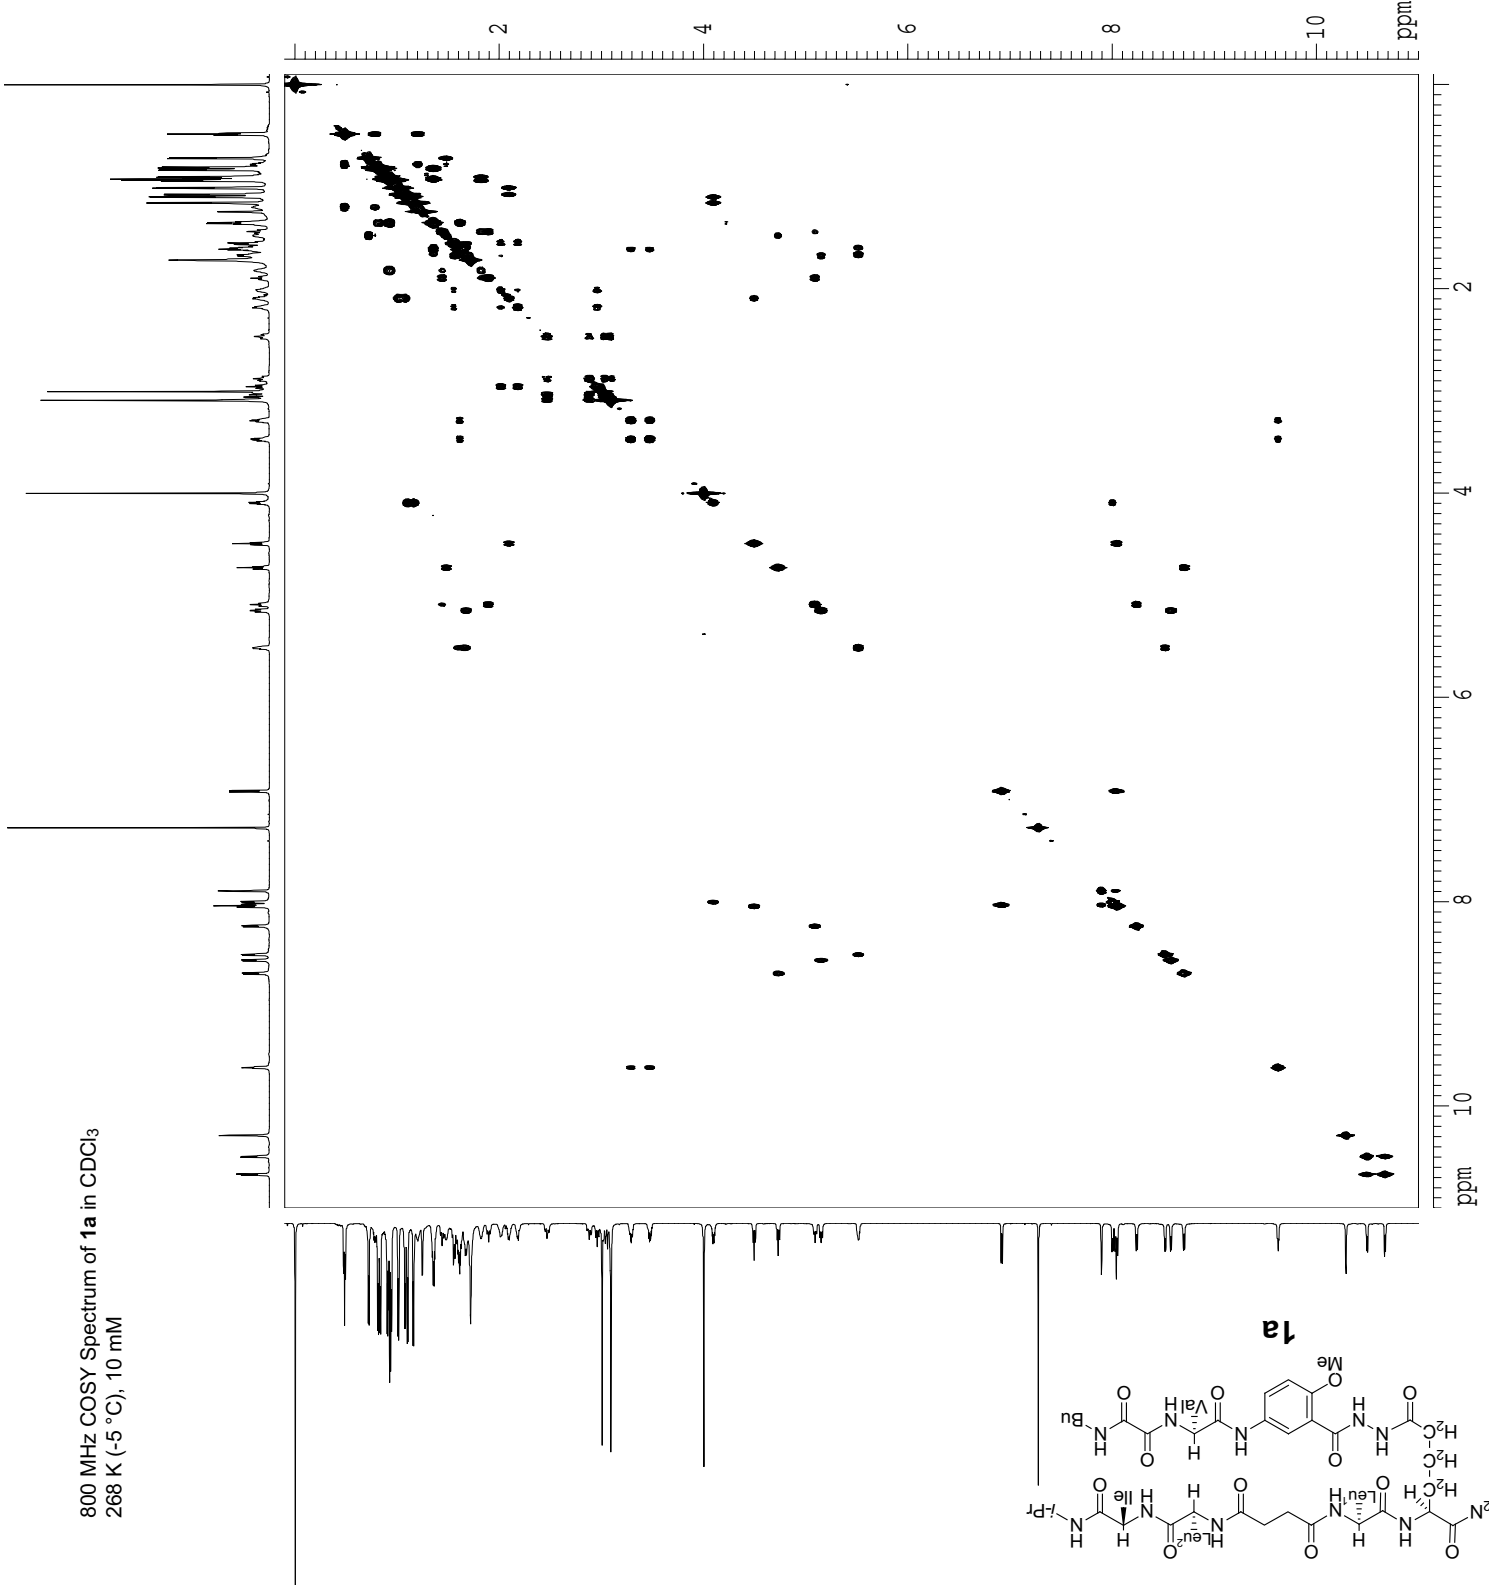

Current Data Parameters  
 USER slevin  
 NAME SL-7-233-800-H  
 EXPNO 2  
 PROCNO 1

F2 - Acquisition Parameters

Date\_ 20070206  
 Time 0.00  
 INSTRUM varian  
 PROBHD 40:5mmroadban  
 PULPROG gcpsy  
 TD 4096  
 SOLVENT cdc13  
 NS 8  
 DS 64  
 SWH 11001.101 Hz  
 FIDRES 2.685816 Hz  
 AQ 0.1843700 sec  
 RG 4096  
 DW 45.450 usec  
 DE 231.43 usec  
 TE 268.5 K

F1 - Acquisition parameters

ND0 1  
 TD 512  
 SF01 799.8107 MHz  
 FIDRES 21.486525 Hz  
 SW 13.755 ppm  
 F1MODE undefined

F2 - Processing parameters

SI 2048  
 SF 799.8064119 MHz  
 WDW SINE  
 SSB 0  
 LB 0.00 Hz  
 GB 0  
 PC 1.40

F1 - Processing parameters

SI 512  
 MC2 QF  
 SF 799.8064119 MHz  
 WDW SINE  
 SSB 0  
 LB 0.00 Hz  
 GB 0

2D NMR plot parameters

CX2 15.00 cm  
 CX1 15.00 cm  
 F2PLO 5.600 ppm  
 F2LO 4478.92 Hz  
 F2PHI -0.100 ppm  
 F2HI -79.98 Hz  
 F1PLO 5.600 ppm  
 F1LO 4478.92 Hz  
 F1PHI -0.100 ppm  
 F1HI -79.98 Hz  
 F2PWC 0.38000 ppm/cm  
 F2ZCM 303.92645 Hz/cm  
 F1PWC 0.38000 ppm/cm  
 F1ZCM 303.92645 Hz/cm

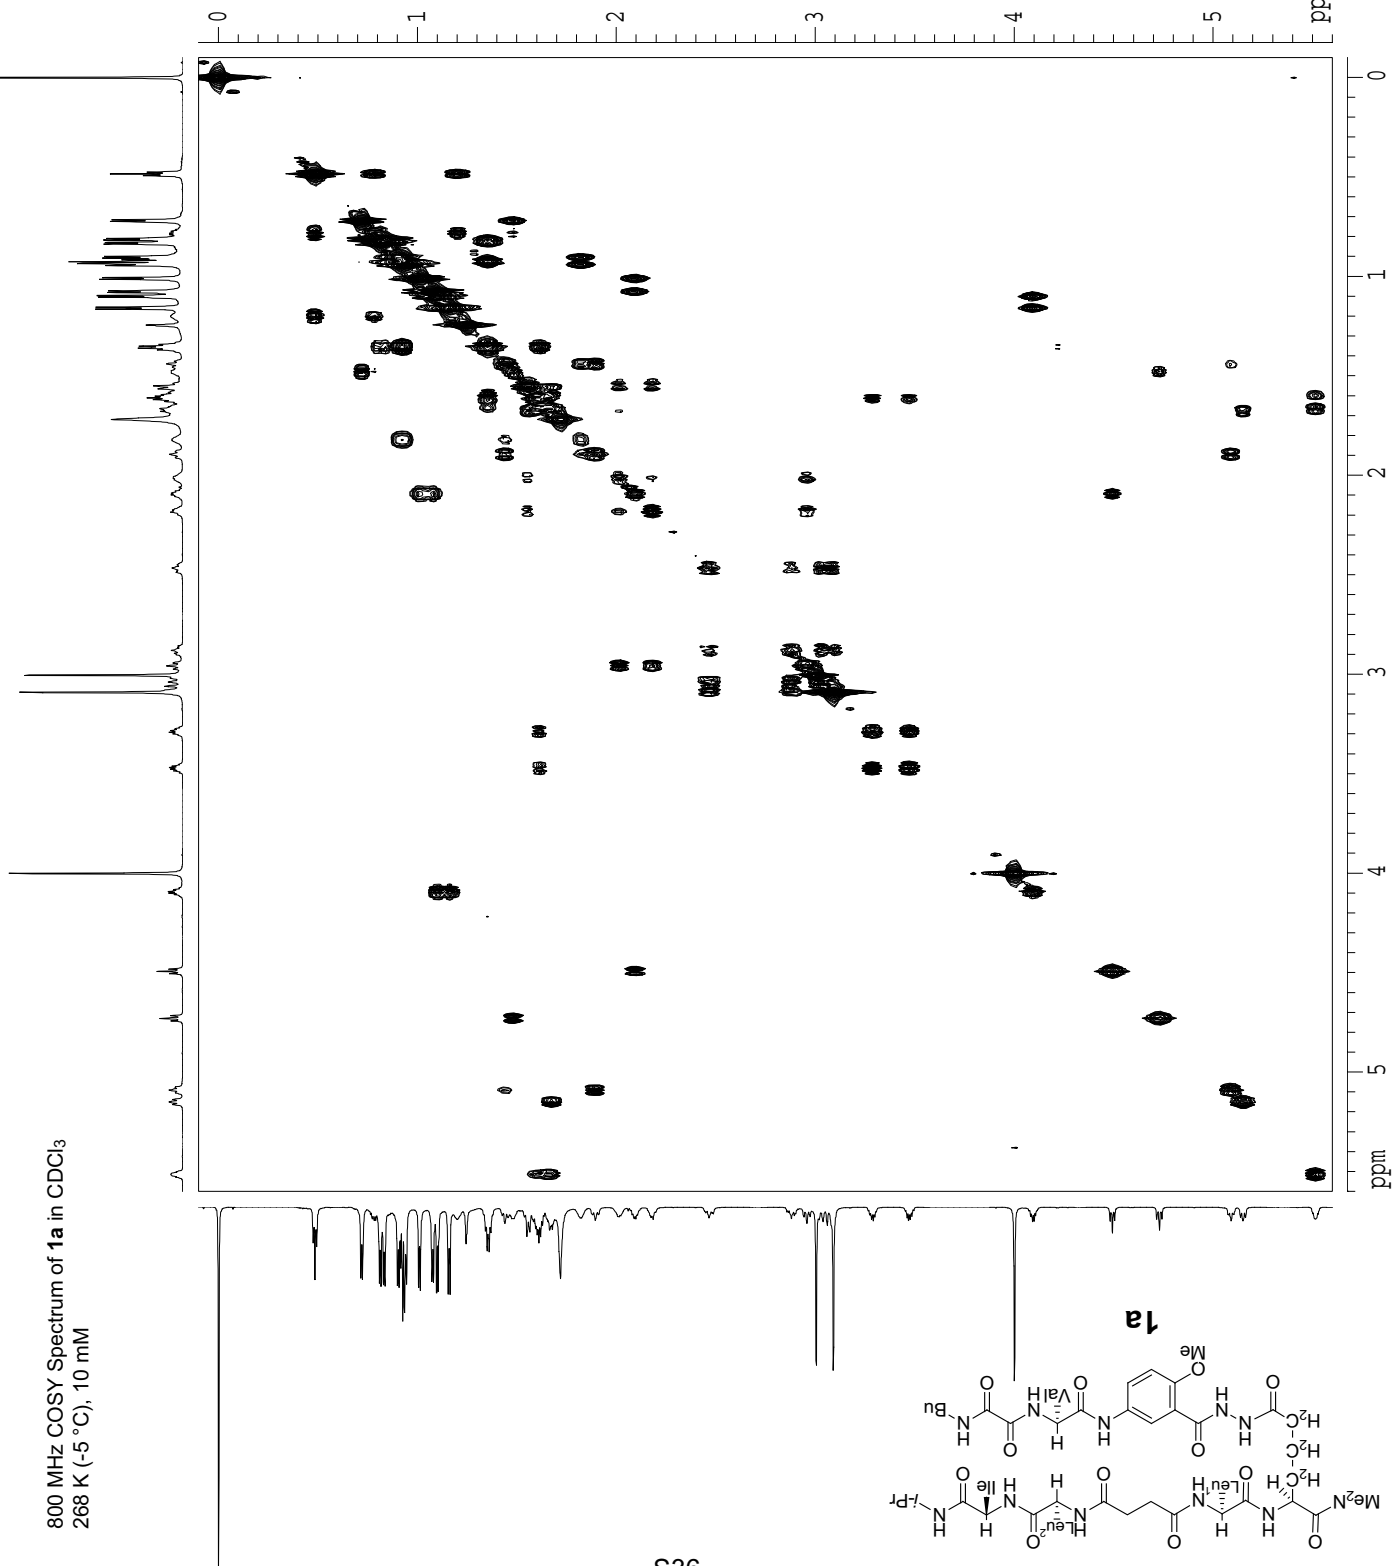

Current Data Parameters  
 USER slevin  
 NAME SL-7-233-800-H  
 EXPNO 2  
 PROCNO 1

## F2 - Acquisition Parameters

Date\_ 20070206  
 Time\_ 0.00  
 INSTRUM varian  
 PROBHD 40:5mm broadband  
 PULPROG gcosy  
 TD 4096  
 SOLVENT cdcl3  
 NS 8  
 DS 64  
 SWH 11001.101 Hz  
 FIDRES 2.685816 Hz  
 AQ 0.1843700 sec  
 RG 4096  
 DW 45.450 usec  
 DE 231.43 usec  
 TE 268.5 K

## F1 - Acquisition parameters

ND0 1  
 TD 512  
 SF01 799.8107 MHz  
 FIDRES 21.486525 Hz  
 SW 13.755 ppm  
 FMODE undefined

## F2 - Processing parameters

SI 2048  
 SF 799.8064119 MHz  
 WDW SINE  
 SSB 0  
 LB 0.00 Hz  
 GB 0  
 PC 1.40

## F1 - Processing parameters

SI 512  
 MC2 QF  
 SF 799.8064119 MHz  
 WDW SINE  
 SSB 0  
 LB 0.00 Hz  
 GB 0

## 2D NMR plot parameters

CX2 15.00 cm  
 CX1 15.00 cm  
 F2PLO 5.602 ppm  
 F2LO 4480.61 Hz  
 F2PHI -0.100 ppm  
 F2HI -79.98 Hz  
 F1PLO 11.000 ppm  
 F1LO 8797.87 Hz  
 F1PHI 5.600 ppm  
 F1HI 4478.92 Hz  
 F2PFCM 0.38014 ppm/cm  
 F2HZCM 304.03955 Hz/cm  
 F1PFCM 0.36000 ppm/cm  
 F1HZCM 287.93030 Hz/cm

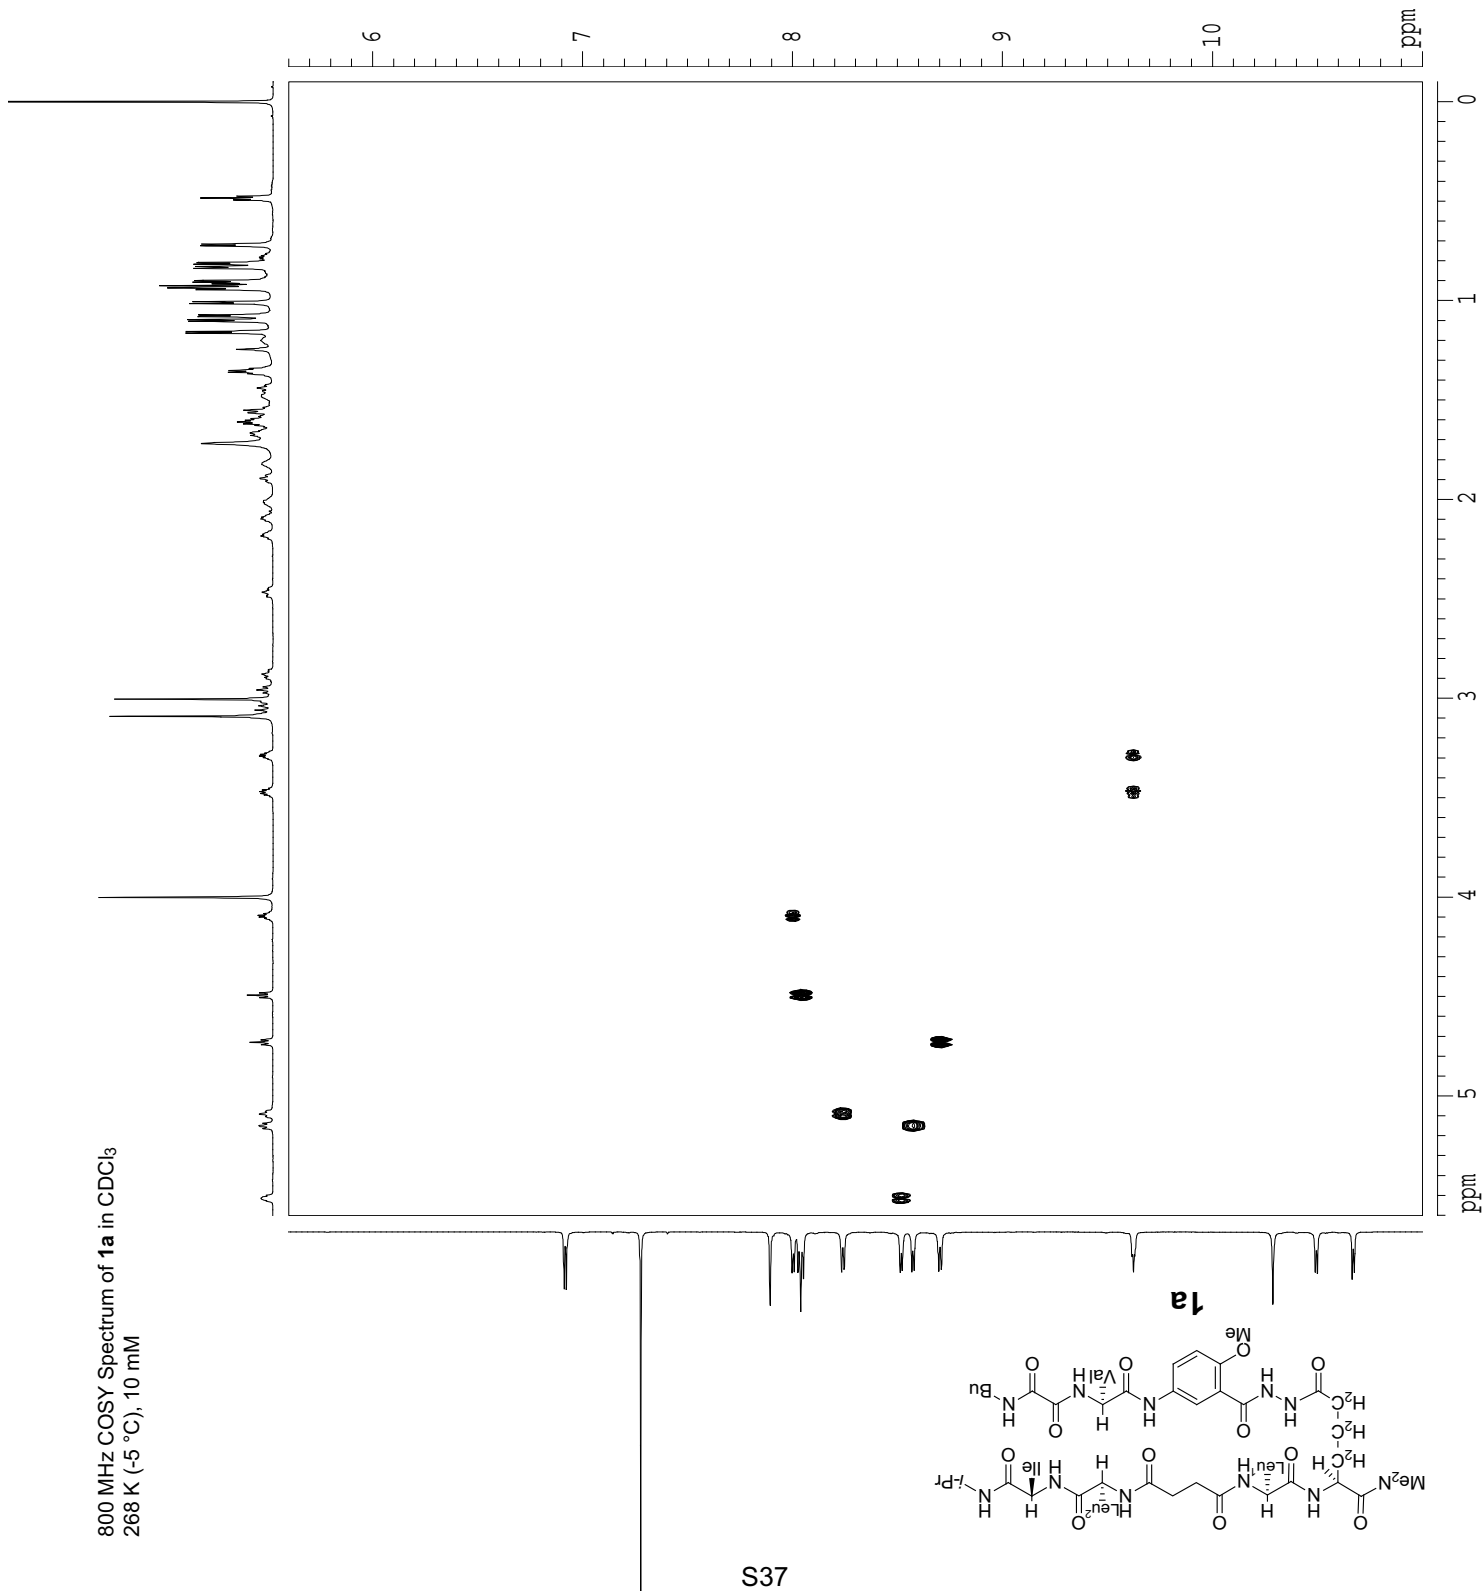

Current Data Parameters  
 USER slevin  
 NAME SL-7-233-800-H  
 EXPNO 2  
 PROCNO 1

## F2 - Acquisition Parameters

Date\_ 20070206  
 Time\_ 0.00  
 INSTRUM varian  
 PROBHD 40:5mmbroadban  
 PULPROG gpcsy  
 TD 4096  
 SOLVENT cdcl3  
 NS 8  
 DS 64  
 SWH 11001.101 Hz  
 FIDRES 2.685816 Hz  
 AQ 0.1843700 sec  
 RG 4096  
 DW 45.450 usec  
 DE 231.43 usec  
 TE 268.5 K

## F1 - Acquisition parameters

ND0 1  
 TD 512  
 SFO1 799.8107 MHz  
 FIDRES 21.486525 Hz  
 SW 13.755 ppm  
 FMODE undefined

## F2 - Processing parameters

SI 2048  
 SF 799.8064119 MHz  
 WDW SINE  
 SSB 0  
 LB 0.00 Hz  
 GB 0  
 PC 1.40

## F1 - Processing parameters

SI 512  
 MC2 QF  
 SF 799.8064119 MHz  
 WDW SINE  
 SSB 0  
 LB 0.00 Hz  
 GB 0

## 2D NMR plot parameters

CX2 15.00 cm  
 CX1 15.00 cm  
 F2PLO 11.000 ppm  
 F2LO 8797.87 Hz  
 F2PHI 5.600 ppm  
 F2HI 4478.92 Hz  
 F1PLO 11.022 ppm  
 F1LO 8815.52 Hz  
 F1PHI 5.595 ppm  
 F1HI 4475.24 Hz  
 F2PWCW 0.36000 ppm/cm  
 F2HZCW 287.93030 Hz/cm  
 F1PWCW 0.36178 ppm/cm  
 F1HZCW 289.35184 Hz/cm

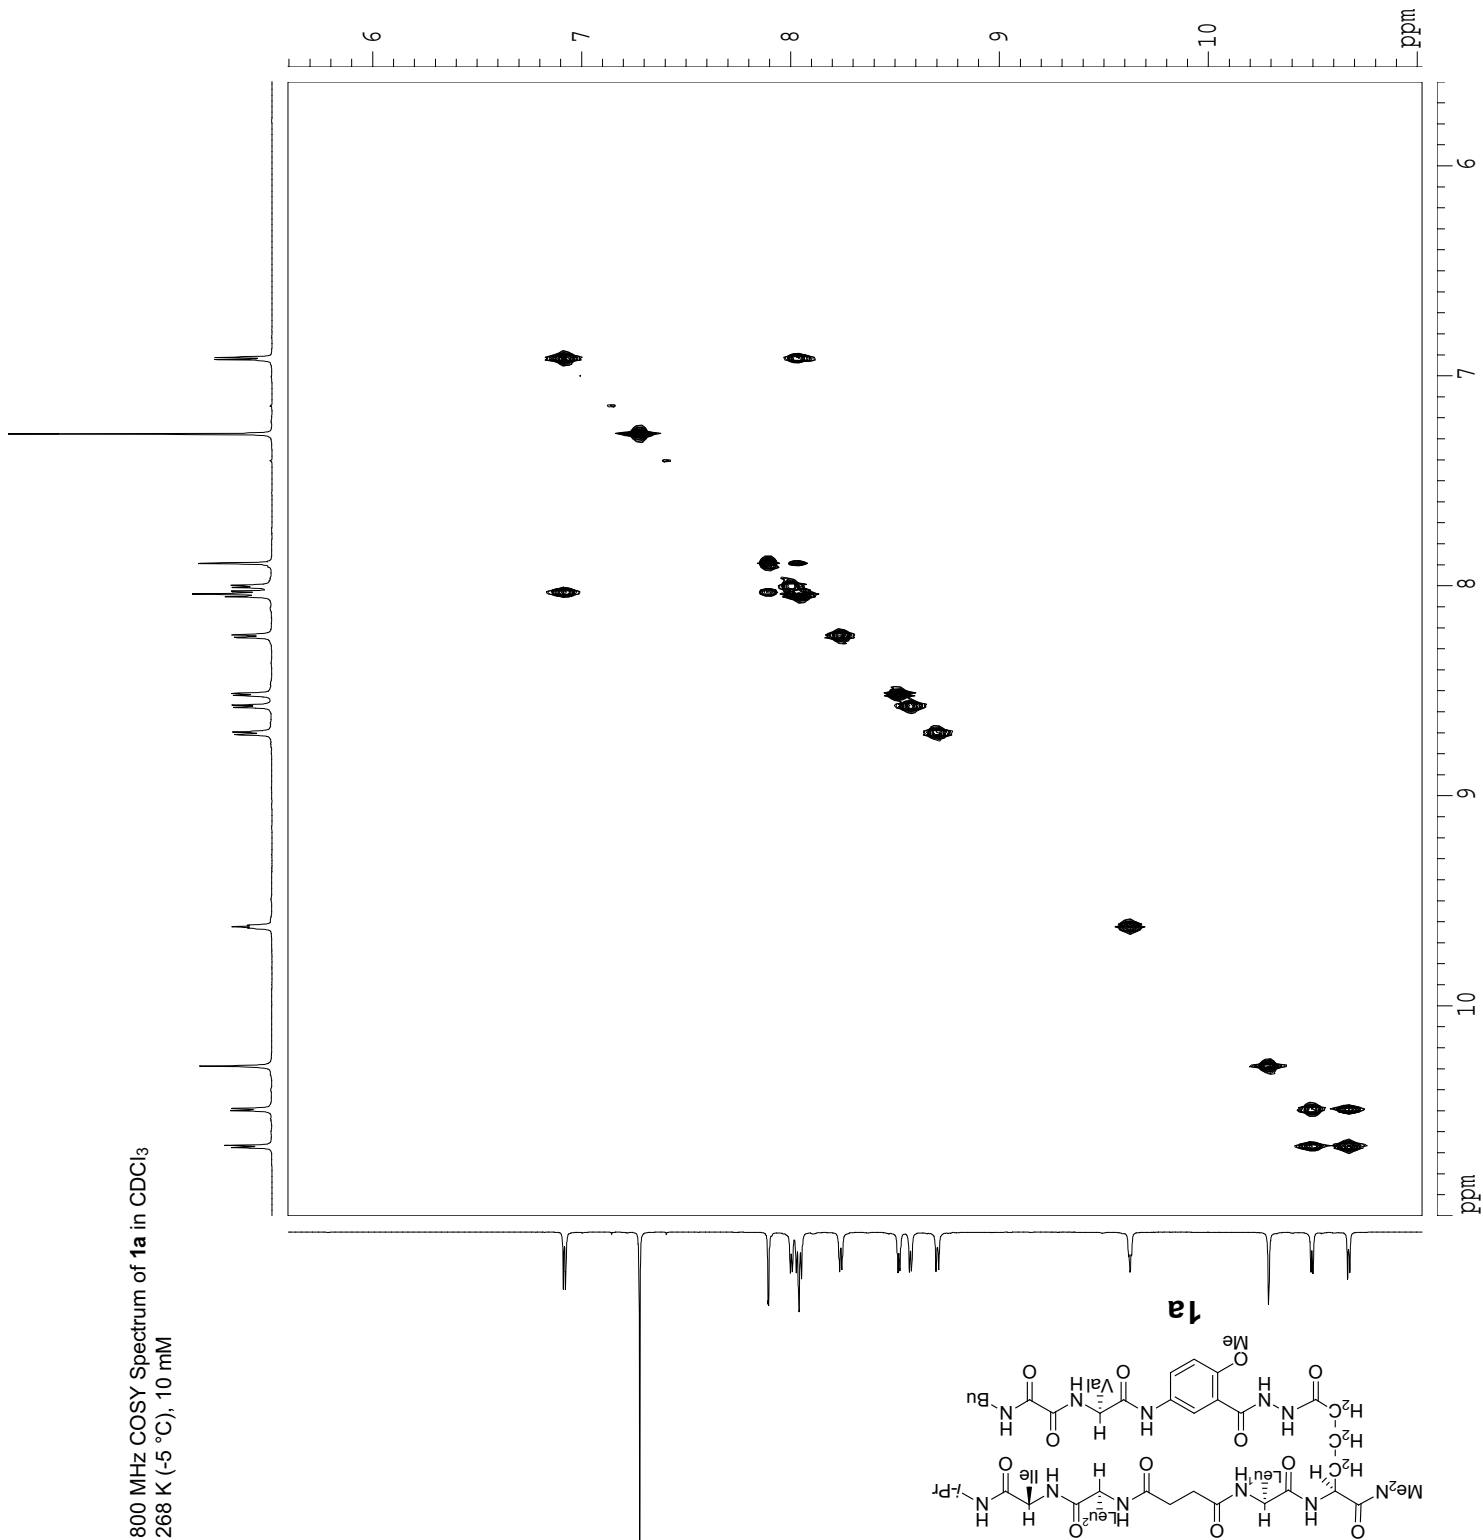

Current Data Parameters  
 USER slewin  
 NAME SL-7-233-800-H  
 EXPNO 2  
 PROCNO 1

F2 - Acquisition Parameters

Date\_ 20070206  
 Time\_ 0:00  
 INSTRUM varian  
 PROBHD 40:5mm broadband  
 PULPROG gcosy  
 TD 4096  
 SOLVENT cdc13  
 NS 8  
 DS 64  
 SWH 11001.101 Hz  
 FIDRES 2.685816 Hz  
 AQ 0.1843700 sec  
 RG 4096  
 DW 45.450 usec  
 DE 231.43 usec  
 TE 268.5 K

F1 - Acquisition parameters

ND0 1  
 TD 512  
 SF01 799.8107 MHz  
 FIDRES 21.486525 Hz  
 SW 13.755 ppm  
 F1MODE undefined

F2 - Processing parameters

SI 2048  
 SF 799.8064119 MHz  
 SINE SINE  
 WDW 0  
 LB 0.00 Hz  
 GB 0  
 PC 1.40

F1 - Processing parameters

SI 512  
 MC2 QF  
 SF 799.8064119 MHz  
 WDW SINE  
 SSB 0  
 LB 0.00 Hz  
 GB 0

2D NMR plot parameters

CX2 15.00 cm  
 CX1 15.00 cm  
 F2PLO 11.002 ppm  
 F2LO 8799.40 Hz  
 F2PHI 5.595 ppm  
 F2HI 4475.24 Hz  
 F1PLO 5.600 ppm  
 F1LO 4478.92 Hz  
 F1PHI -0.100 ppm  
 F1HI -79.98 Hz  
 F2PPMCM 0.36043 ppm/cm  
 F2HZCM 288.27753 Hz/cm  
 F1PPMCM 0.38000 ppm/cm  
 F1HZCM 303.92645 Hz/cm

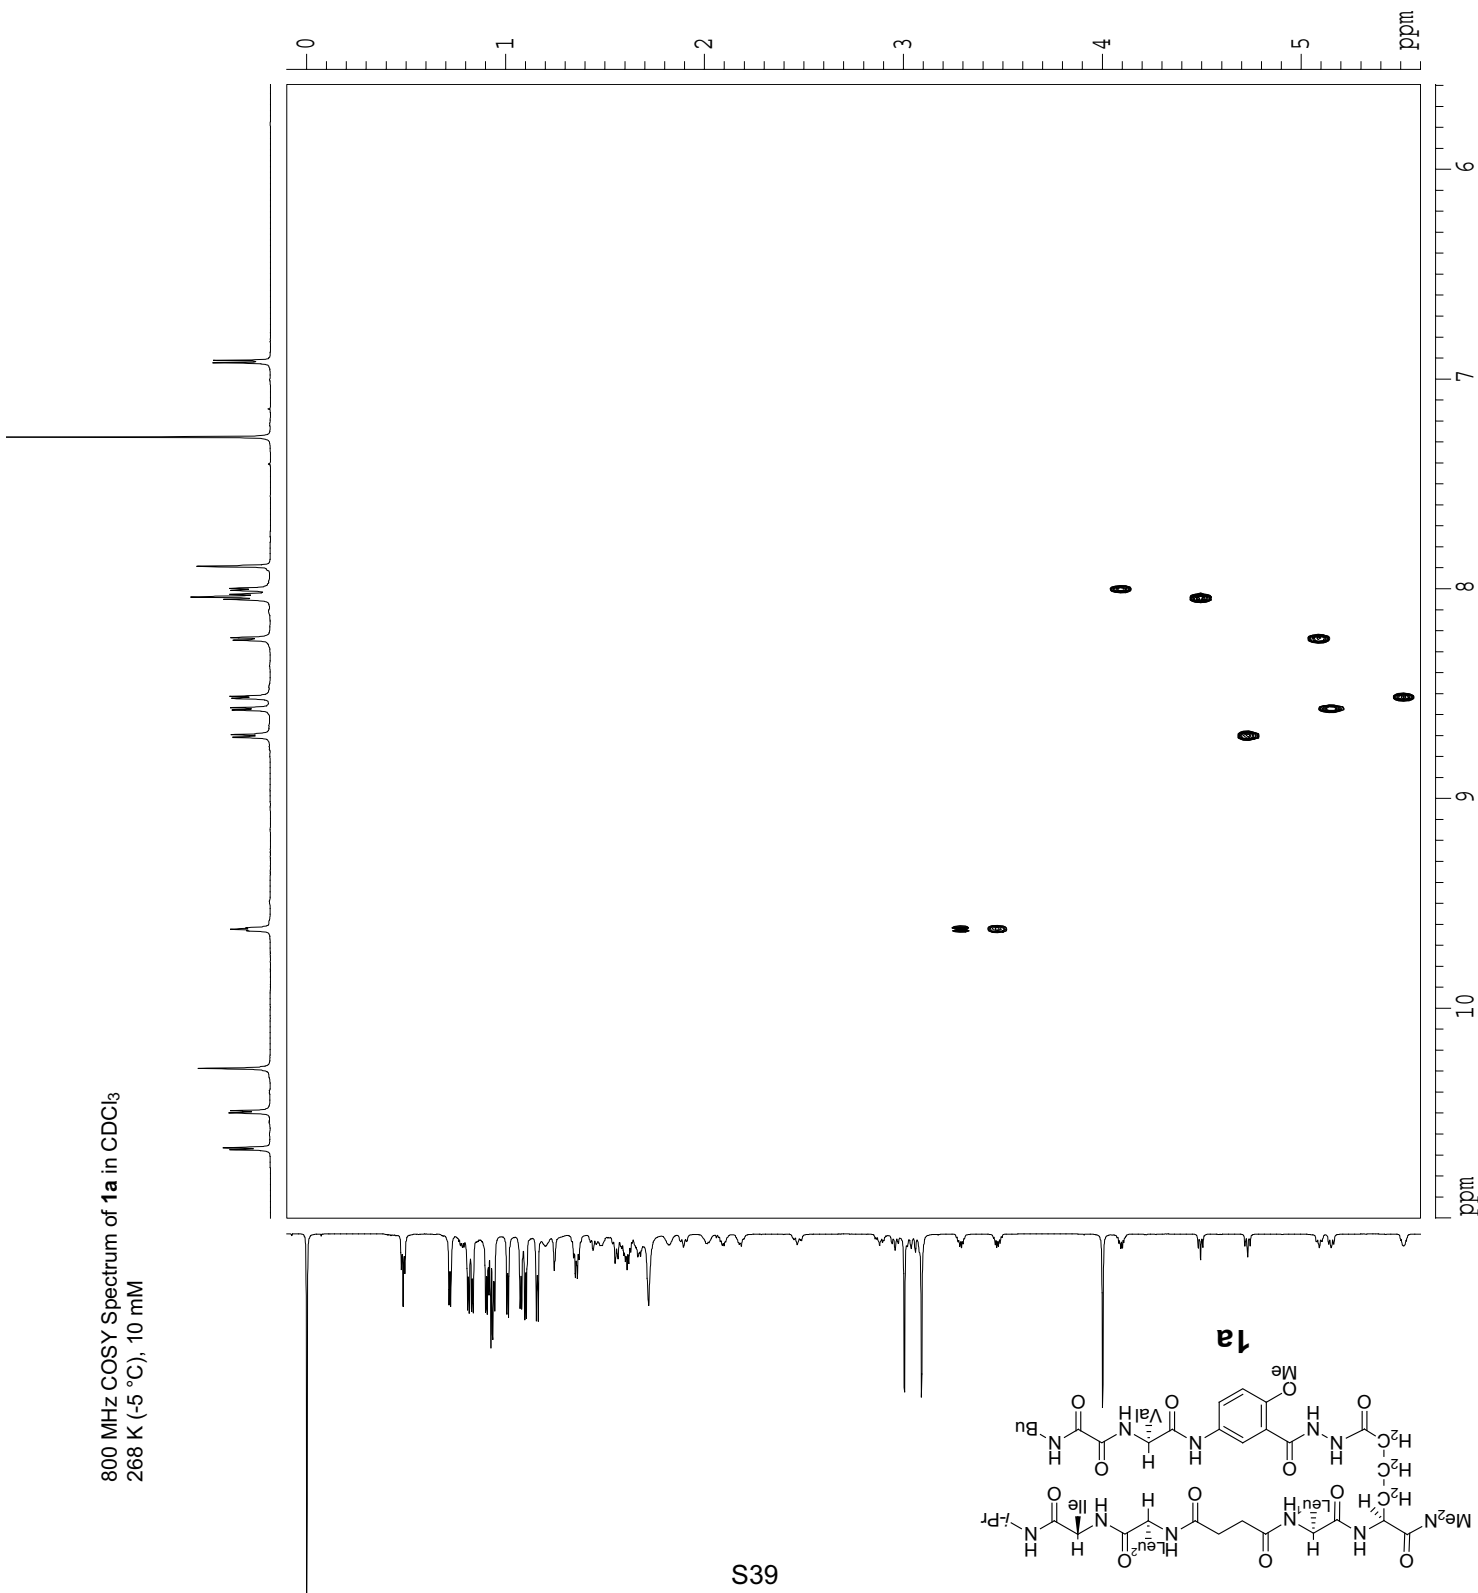

Current Data Parameters  
 USER slevin  
 NAME SL-7-233-800-H  
 EXPNO 2  
 PROCNO 1

F2 - Acquisition Parameters

Date\_ 20070206  
 Time 0.00  
 INSTRUM varian  
 PROBHD 40:5mmBroadban  
 PULPROG gcosy  
 TD 4096  
 SOLVENT cdcl3  
 NS 8  
 DS 64  
 SWH 11001.101 Hz  
 FIDRES 2.685816 Hz  
 AQ 0.1843700 sec  
 RG 4096  
 DW 45.450 usec  
 DE 231.43 usec  
 TE 268.5 K

F1 - Acquisition parameters

ND0 1  
 TD 512  
 SF01 799.8107 MHz  
 FIDRES 21.486525 Hz  
 SW 13.755 ppm  
 F1MODE undefined

F2 - Processing parameters

SI 2048  
 SF 799.8064119 MHz  
 WDW SINE  
 SSB 0  
 LB 0.00 Hz  
 GB 0  
 PC 1.40

F1 - Processing parameters

SI 512  
 MC2 QF  
 SF 799.8064119 MHz  
 WDW SINE  
 SSB 0  
 LB 0.00 Hz  
 GB 0

2D NMR plot parameters

CX2 15.00 cm  
 CX1 15.00 cm  
 F2PLO 5.642 ppm  
 F2LO 4512.84 Hz  
 F2PHI 4.346 ppm  
 F2HI 3476.12 Hz  
 F1PLO 2.237 ppm  
 F1LO 1789.43 Hz  
 F1PHI 1.243 ppm  
 F1HI 994.42 Hz  
 F2PPMCM 0.08641 ppm/cm  
 F2HZCM 69.11499 Hz/cm  
 F1PPMCM 0.06627 ppm/cm  
 F1HZCM 53.00010 Hz/cm

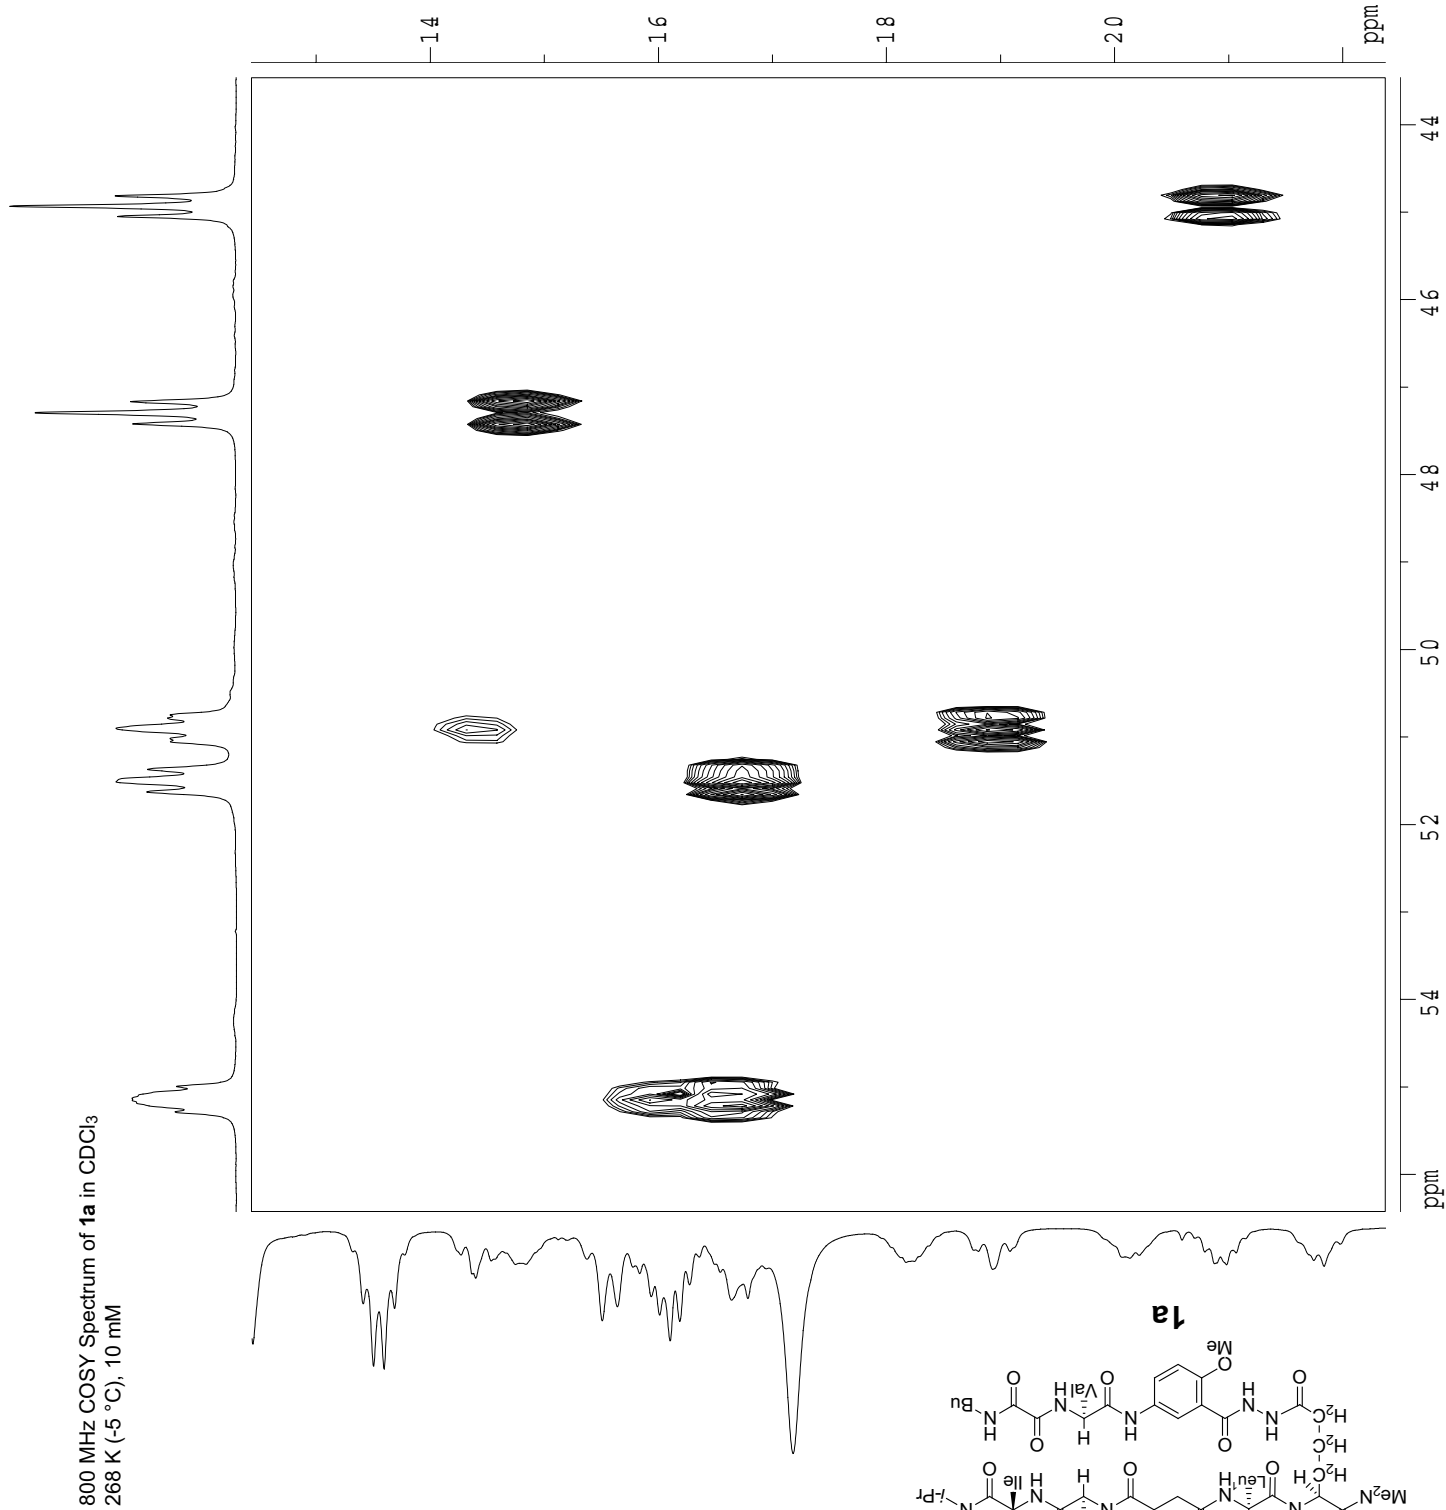





Supporting Information

Current Data Parameters  
 USER slevin  
 NAME SL-7-233-800-H  
 EXPNO 3  
 PROCNO 1

F2 - Acquisition Parameters  
 Date\_ 20070206  
 Time 0.00  
 INSTRUM varian  
 PROBHD 40:5mmrroadbn  
 PULPROG wgtocsy\_bn  
 TD 4096  
 SOLVENT CDCl3  
 NS 16  
 DS 64  
 SWH 11001.101 Hz  
 FIDRES 2.685816 Hz  
 AQ 0.1862132 sec  
 RG 287.4  
 DW 45.450 usec  
 DE 6.00 usec  
 TE 268.5 K

F1 - Acquisition Parameters  
 ND0 1  
 TD 1024  
 SFO1 799.8107 MHz  
 FIDRES 10.743262 Hz  
 SW 13.755 ppm  
 PrMODE undefined

F2 - Processing parameters  
 SI 2048  
 SF 799.8064119 MHz  
 WDW QSINE  
 SSB 2  
 LB 0.00 Hz  
 GB 0  
 PC 1.40

F1 - Processing parameters  
 SI 1024  
 MC2 States  
 SF 799.8064119 MHz  
 WDW QSINE  
 SSB 2  
 LB 0.00 Hz  
 GB 0

S. Levin and J. S. Nowick

2D NMR plot parameters  
 CX2 15.00 cm  
 CX1 15.00 cm  
 F2PLO 11.000 ppm  
 F2LO 8797.87 Hz  
 F2PHI -0.100 ppm  
 F2HI -79.98 Hz  
 F1PLO 11.000 ppm  
 F1LO 8797.87 Hz  
 F1PHI -0.100 ppm  
 F1HI -79.98 Hz  
 F2PPMCM 0.74000 ppm/cm  
 F1PPMCM 591.85669 Hz/cm  
 F1HZCM 0.74000 ppm/cm  
 F1HZCM 591.85669 Hz/cm

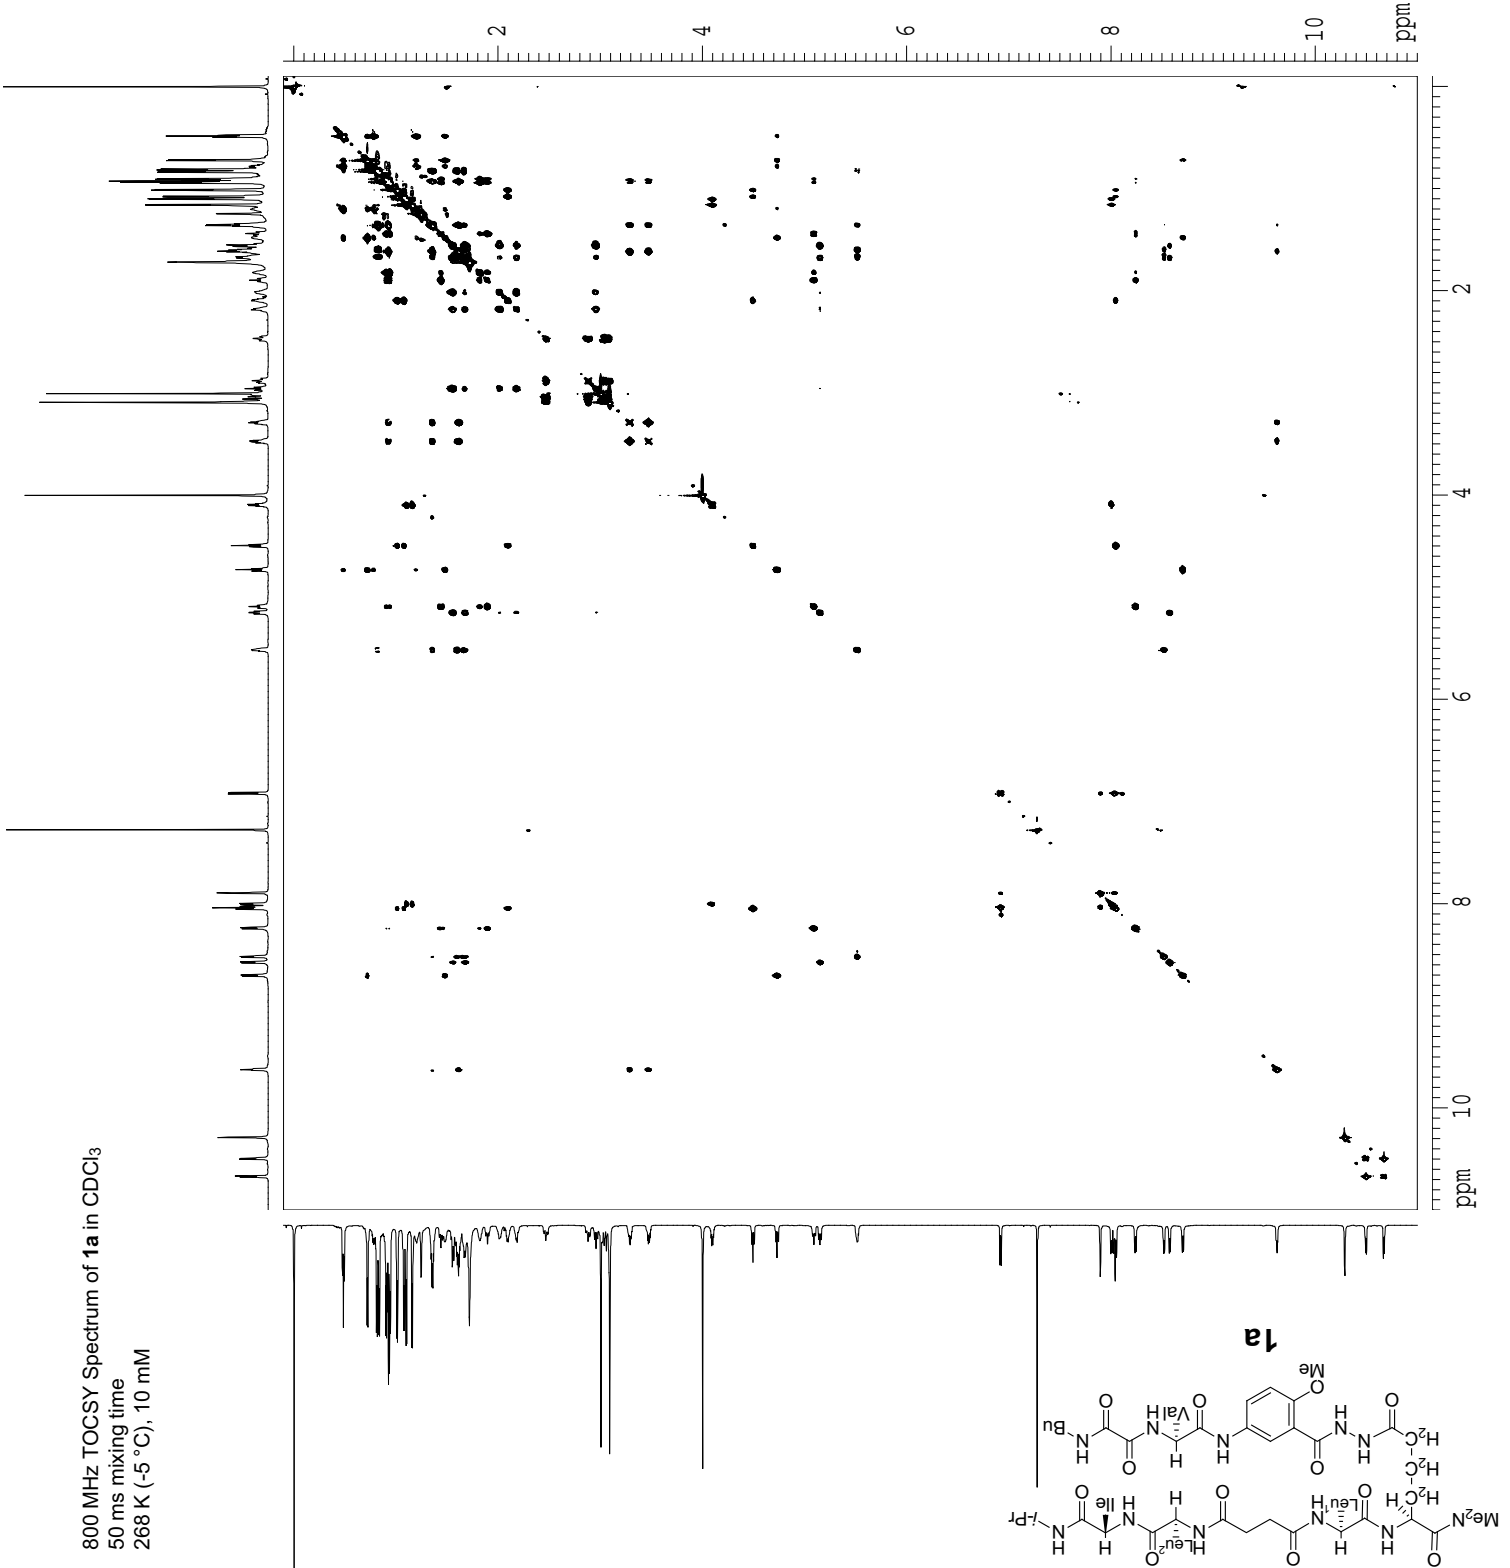

800 MHz TOCSY Spectrum of **1a** in CDCl<sub>3</sub>  
 50 ms mixing time  
 268 K (-5 °C), 10 mM

Supporting Information

S. Levin and J. S. Nowick

Current Data Parameters  
 USER slevin  
 NAME SL-7-233-800-H  
 EXPNO 3  
 PROCNO 1

F2 - Acquisition Parameters

Date\_ 20070206  
 Time\_ 0.00  
 INSTRUM varian  
 PROBHD 40:5mmBroadban  
 PULPROG wgtocsy\_bn  
 TD 4096  
 SOLVENT CDCl3  
 NS 16  
 DS 64  
 SWH 11001.101 Hz  
 FIDRES 2.685816 Hz  
 AQ 0.1862132 sec  
 RG 287.4  
 DW 45.450 usec  
 DE 6.00 usec  
 TE 268.5 K

F1 - Acquisition Parameters

ND0 1  
 TD 1024  
 SFO1 799.8107 MHz  
 FIDRES 10.743262 Hz  
 SW 13.755 ppm  
 FmMODE undefined

F2 - Processing parameters

SI 2048  
 SF 799.8064119 MHz  
 WDW QSI  
 SSB 2  
 LB 0.00 Hz  
 GB 0  
 PC 1.40

F1 - Processing parameters

SI 1024  
 MC2 States  
 SF 799.8064119 MHz  
 WDW QSI  
 SSB 2  
 LB 0.00 Hz  
 GB 0

2D NMR plot parameters

CX2 15.00 cm  
 CX1 15.00 cm  
 F2FLO 5.600 ppm  
 F2LO 4478.92 Hz  
 F2PHI -0.100 ppm  
 F2HI -79.98 Hz  
 F1FLO 5.600 ppm  
 F1LO 4478.92 Hz  
 F1PHI -0.100 ppm  
 F1HI -79.98 Hz  
 F2PPMCM 0.38000 ppm/cm  
 F2HZCM 303.92645 Hz/cm  
 F1PPMCM 0.38000 ppm/cm  
 F1HZCM 303.92645 Hz/cm

800 MHz TOCSY Spectrum of **1a** in CDCl<sub>3</sub>  
 50 ms mixing time  
 268 K (-5 °C), 10 mM

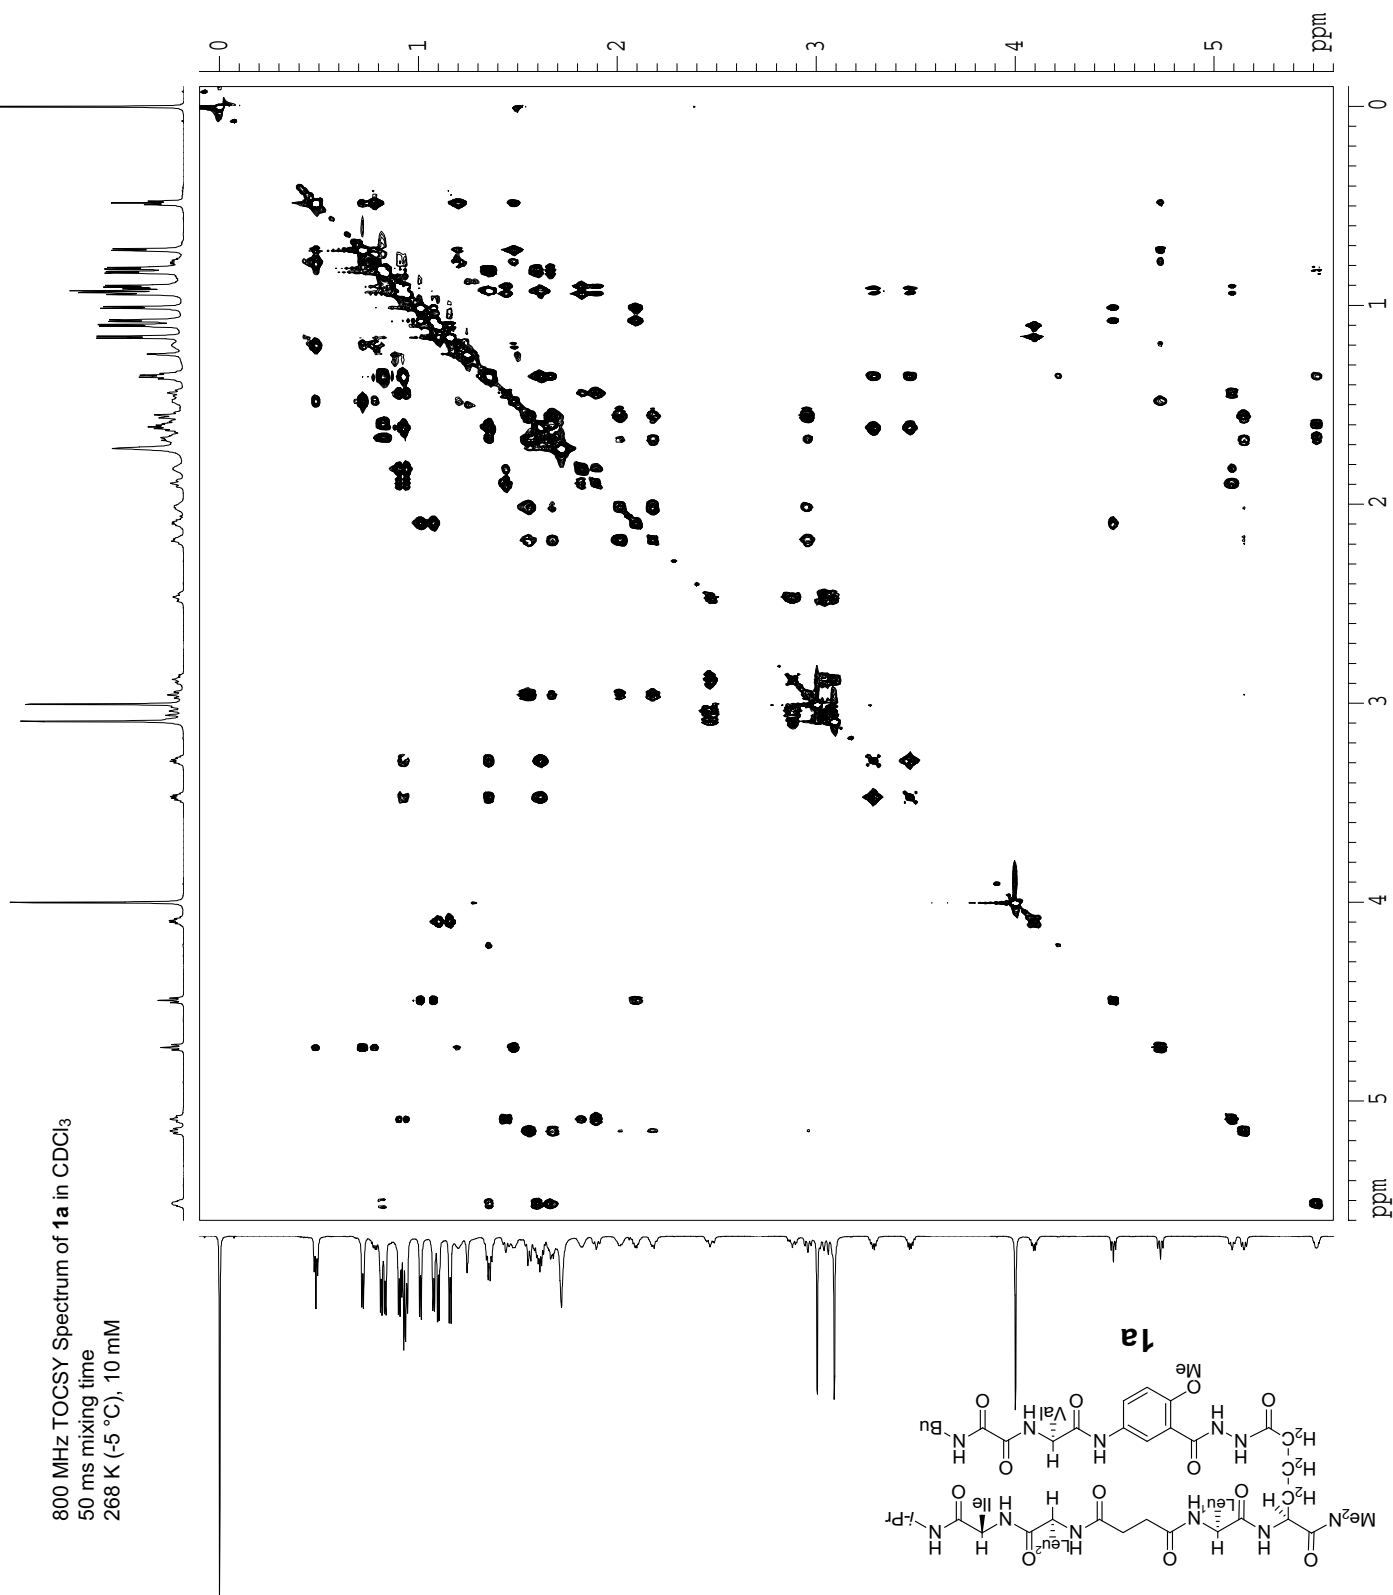

Supporting Information

Current Data Parameters  
 USER slevin  
 NAME SL-7-233-800-H  
 EXPNO 3  
 PROCNO 1

F2 - Acquisition Parameters

Date\_ 20070206  
 Time\_ 0.00  
 INSTRUM varian  
 PROBHD 40:5mm broadband  
 PULPROG wgtocsy\_bn  
 TD 4096  
 SOLVENT CDCl3  
 NS 16  
 DS 64  
 SWH 11001.101 Hz  
 FIDRES 2.685816 Hz  
 AQ 0.1862132 sec  
 RG 287.4  
 DW 45.450 usec  
 DE 6.00 usec  
 TE 268.5 K

F1 - Acquisition Parameters

ND0 1  
 TD 1024  
 SF01 799.8107 MHz  
 FIDRES 10.743262 Hz  
 SW 13.755 ppm  
 F1MODE undefined

F2 - Processing parameters

SI 2048  
 SF 799.8064119 MHz  
 WDW QSI  
 SSB 2  
 LB 0.00 Hz  
 GB 0  
 PC 1.40

F1 - Processing parameters

SI 1024  
 MC2 States  
 SF 799.8064119 MHz  
 WDW QSI  
 SSB 2  
 LB 0.00 Hz  
 GB 0

2D NMR plot parameters

CX2 15.00 cm  
 CX1 15.00 cm  
 F2PLO 11.000 ppm  
 F2LO 8797.87 Hz  
 F2PHI 5.600 ppm  
 F2HI 4478.92 Hz  
 F1PLO 5.609 ppm  
 F1LO 4485.98 Hz  
 F1PHI -0.113 ppm  
 F1HI -90.64 Hz  
 F2PPMCM 0.36000 ppm/cm  
 F2HZCM 287.93030 Hz/cm  
 F1PPMCM 0.38148 ppm/cm  
 F1HZCM 305.10861 Hz/cm

800 MHz TOCSY Spectrum of **1a** in CDCl<sub>3</sub>  
 50 ms mixing time  
 268 K (-5 °C), 10 mM

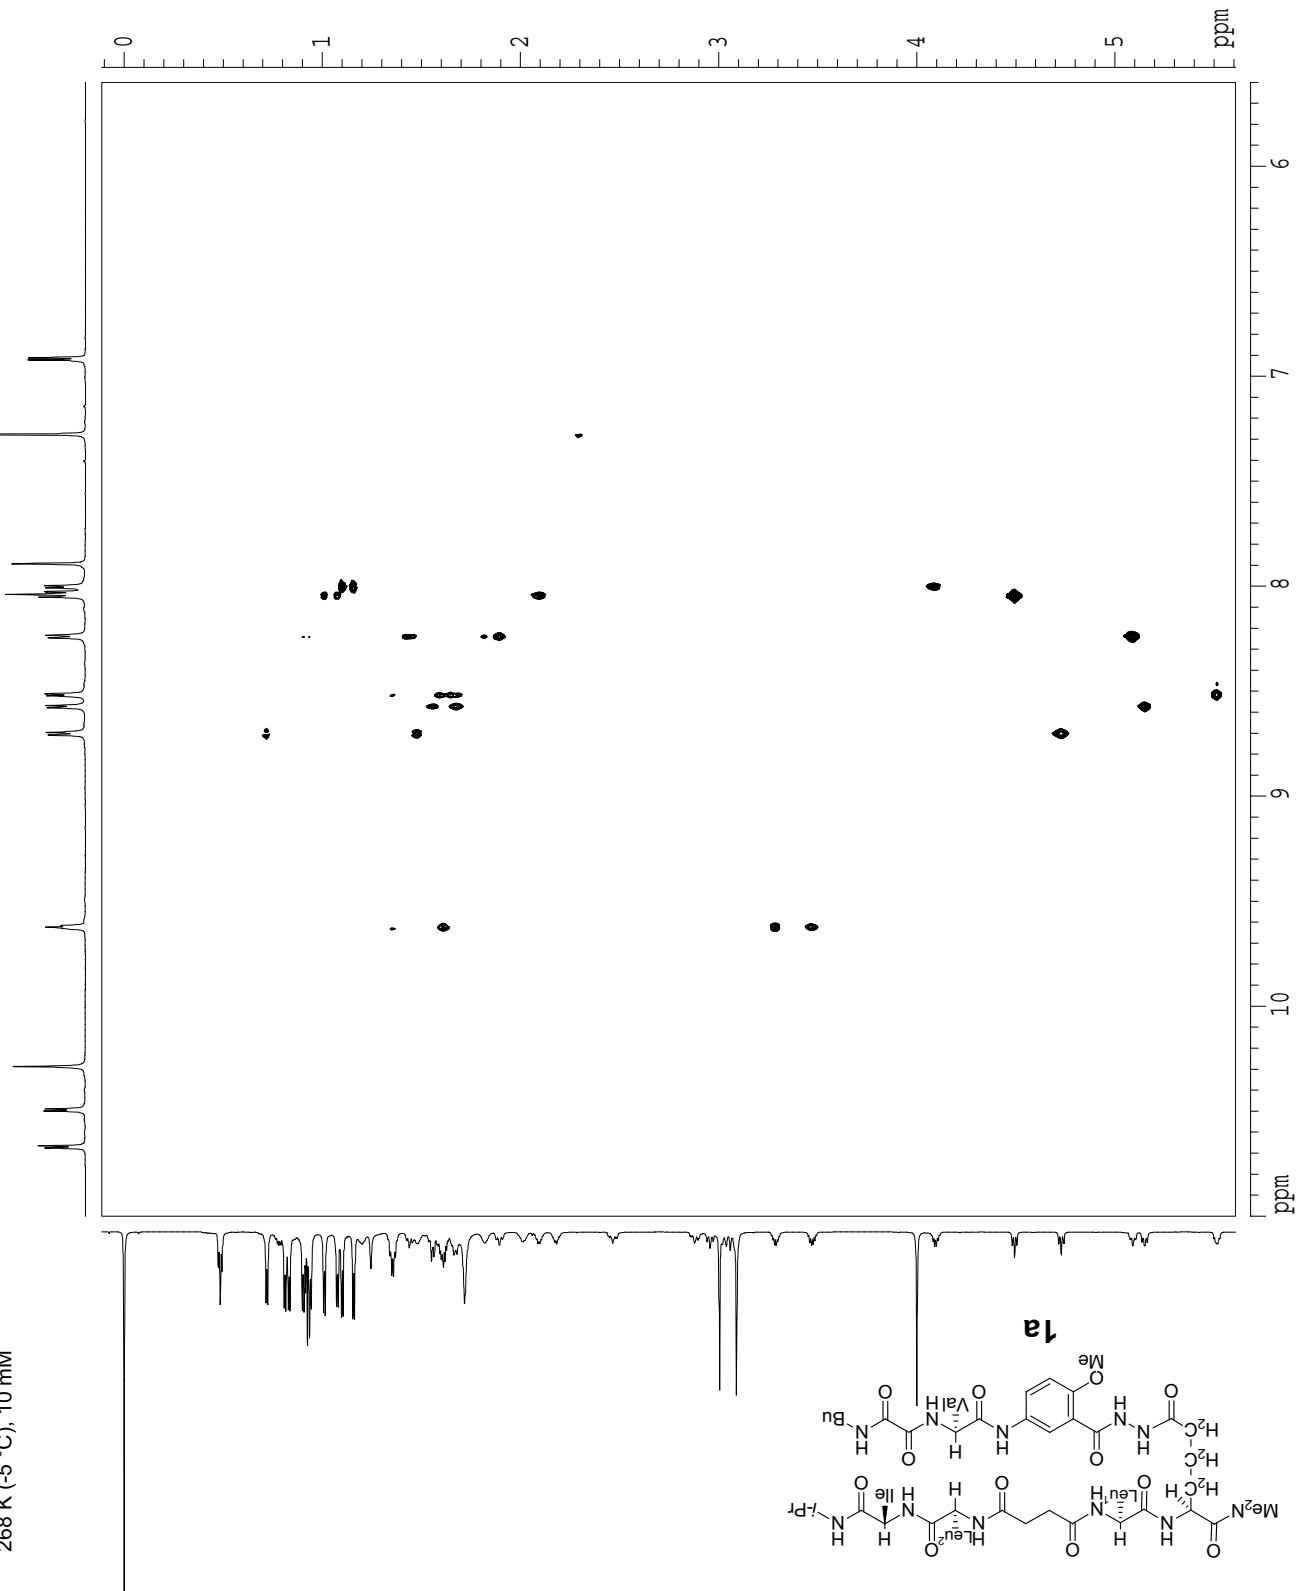

Supporting Information

Current Data Parameters  
 USER slevin  
 NAME SL-7-233-800-H  
 EXPNO 3  
 PROCNO 1

F2 - Acquisition Parameters  
 Date\_ 20070206  
 Time 0:00  
 INSTRUM varian  
 PROBHD 40:5mm broadband  
 PULPROG wgtocsy\_bn  
 TD 4096  
 SOLVENT CDCl3  
 NS 16  
 DS 64  
 SWH 11001.101 Hz  
 FIDRES 2.685816 Hz  
 AQ 0.1862132 sec  
 RG 287.4  
 DW 45.450 usec  
 DE 6.00 usec  
 TE 268.5 K

F1 - Acquisition Parameters  
 ND0 1  
 TD 1024  
 SF01 799.8107 MHz  
 FIDRES 10.743262 Hz  
 SW 13.755 ppm  
 F1MODE undefined

F2 - Processing parameters  
 SI 2048  
 SF 799.8064119 MHz  
 WDW QSI  
 SSB 2  
 LB 0.00 Hz  
 GB 0  
 PC 1.40

F1 - Processing parameters  
 SI 1024  
 MC2 States  
 SF 799.8064119 MHz  
 WDW QSI  
 SSB 2  
 LB 0.00 Hz  
 GB 0

2D NMR plot parameters  
 CX2 15.00 cm  
 CX1 15.00 cm  
 F2PLO 11.002 ppm  
 F2LO 8799.40 Hz  
 F2PHI 5.595 ppm  
 F2HI 4475.24 Hz  
 F1PLO 11.000 ppm  
 F1LO 8797.87 Hz  
 F1PHI 5.600 ppm  
 F1HI 4478.92 Hz  
 F2PDMC 0.36043 ppm/cm  
 F2HZCM 288.27753 Hz/cm  
 F1PDMC 0.36000 ppm/cm  
 F1HZCM 287.93030 Hz/cm

S. Levin and J. S. Nowick

800 MHz TOCSY Spectrum of **1a** in CDCl<sub>3</sub>  
 50 ms mixing time  
 268 K (-5 °C), 10 mM

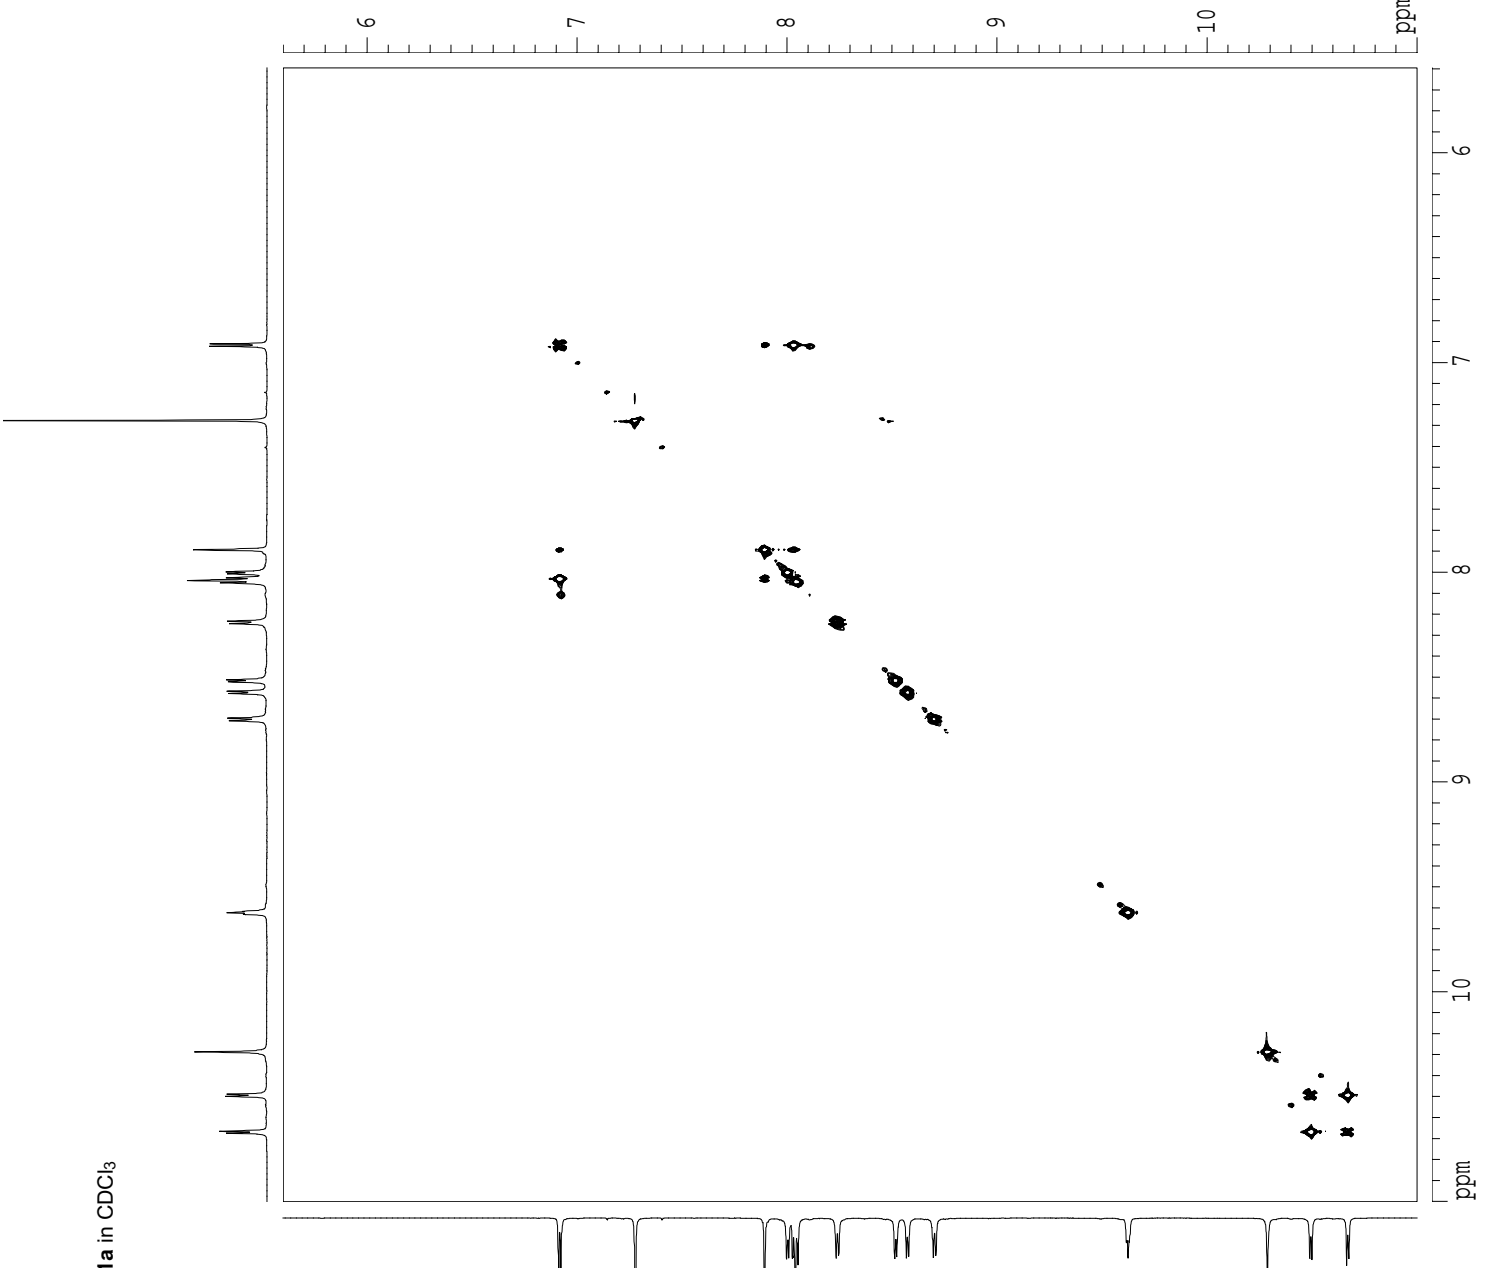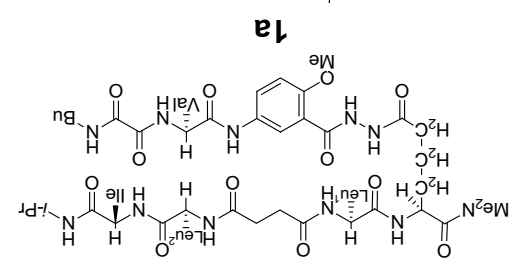

Supporting Information

Current Data Parameters  
 USER sievin  
 NAME SL-7-233-800-H  
 EXPNO 3  
 PROCNO 1

F2 - Acquisition Parameters

Date\_ 20070206  
 Time\_ 0.00  
 INSTRUM varian  
 PROBHD 40:5mmBroadban  
 PULPROG wgtocsy\_bn  
 TD 4096  
 SOLVENT CDCl3  
 NS 16  
 DS 64  
 SWH 11001.101 Hz  
 FIDRES 2.685816 Hz  
 AQC 0.1862132 sec  
 RG 287.4  
 DW 45.450 usec  
 DE 6.00 usec  
 TE 268.5 K

F1 - Acquisition parameters

ND0 1  
 TD 1024  
 SF01 799.8107 MHz  
 FIDRES 10.743262 Hz  
 SW 13.755 ppm  
 FMODE undefined

F2 - Processing parameters

SI 2048  
 SF 799.8064119 MHz  
 WDW QSINE  
 SSB 2  
 LB 0.00 Hz  
 GB 0  
 PC 1.40

F1 - Processing parameters

SI 1024  
 MC2 States  
 SF 799.8064119 MHz  
 WDW QSINE  
 SSB 2  
 LB 0.00 Hz  
 GB 0

S. Levin and J. S. Nowick

2D NMR plot parameters

CX2 15.00 cm  
 CX1 15.00 cm  
 F2PLO 5.600 ppm  
 F2LO 4478.92 Hz  
 F2PHI -0.100 ppm  
 F2HI -79.98 Hz  
 F1PLO 11.009 ppm  
 F1LO 8804.78 Hz  
 F1PHI 5.595 ppm  
 F1HI 4475.24 Hz  
 F2PPCM 0.38000 ppm/cm  
 F2HZCM 303.92645 Hz/cm  
 F1PPCM 0.36088 ppm/cm  
 F1HZCM 288.63562 Hz/cm

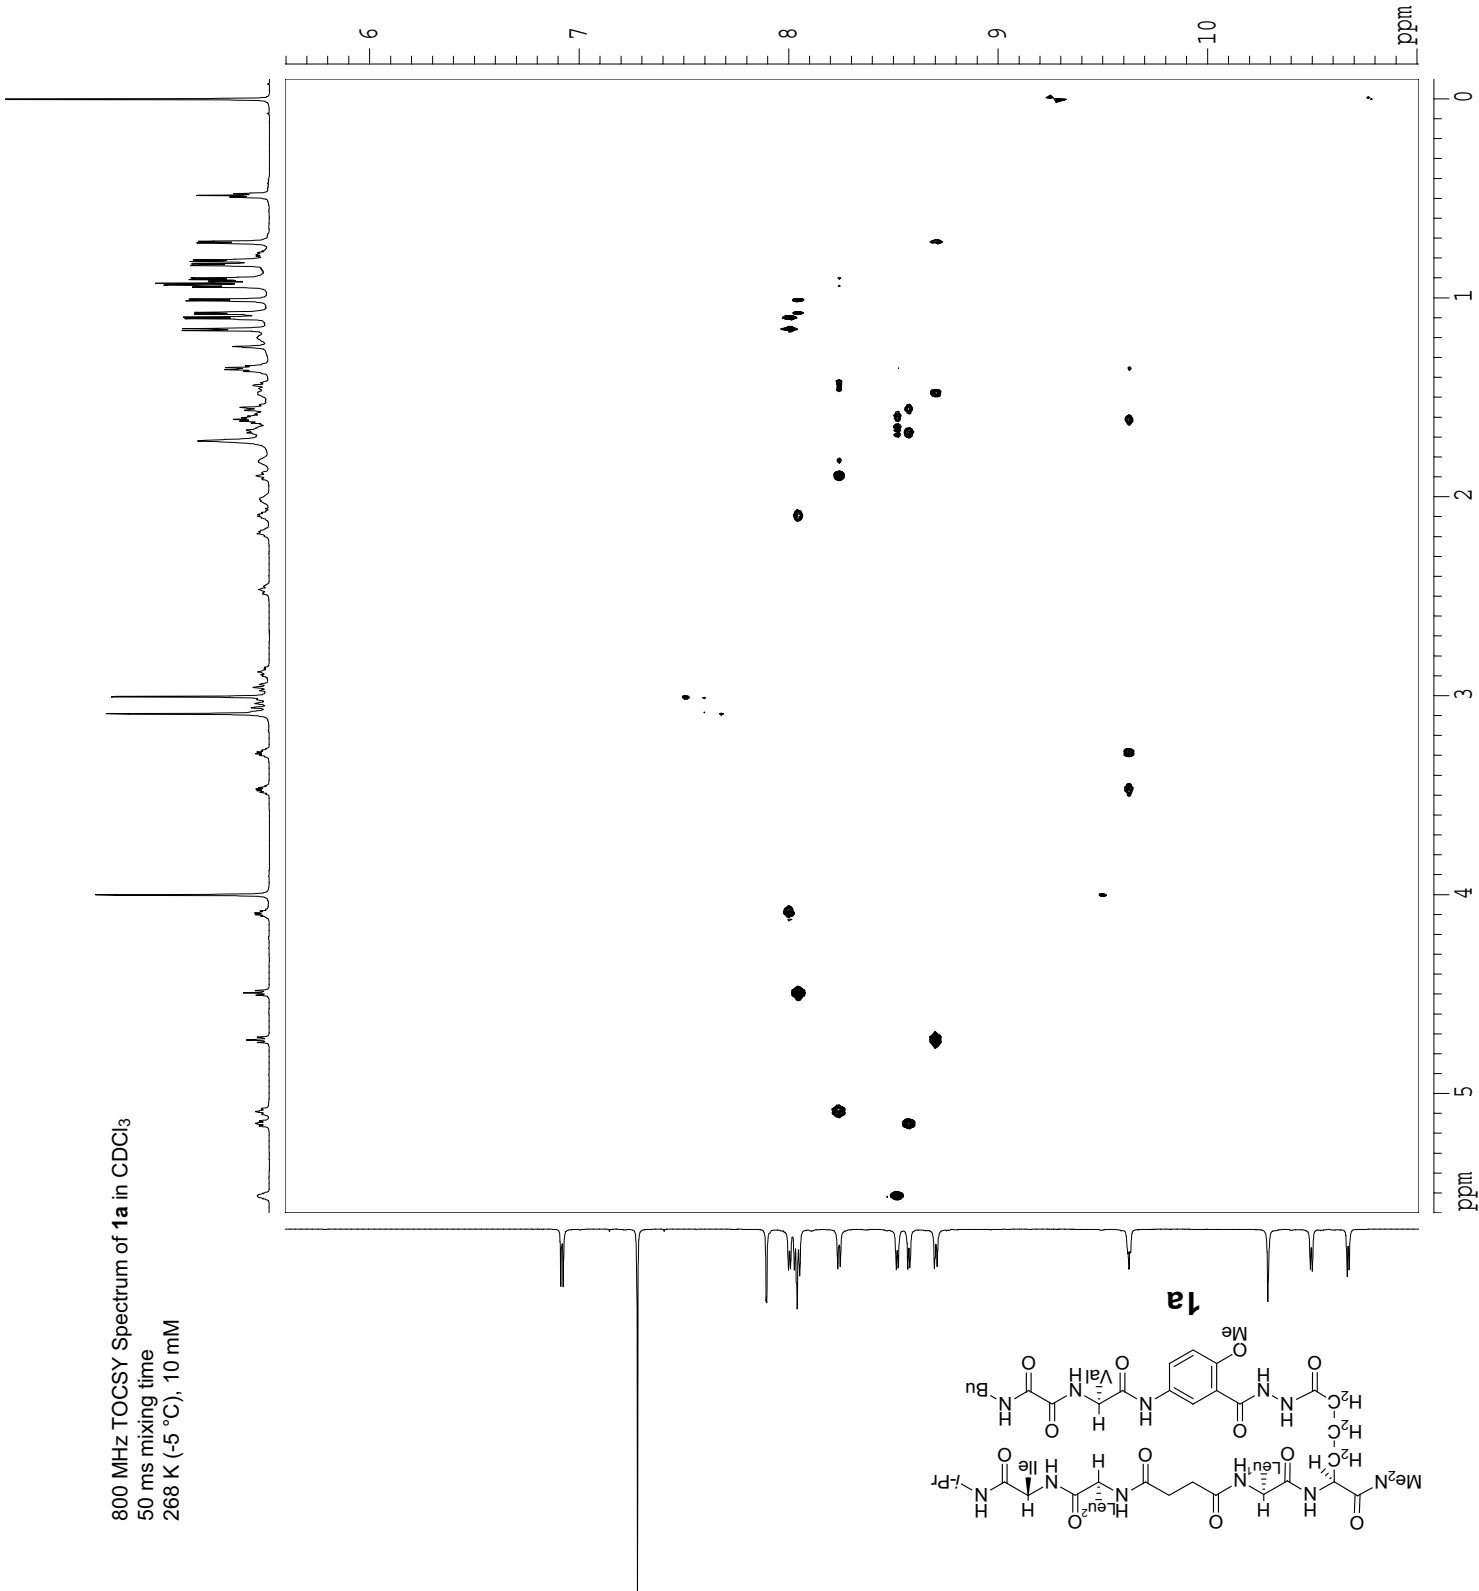

800 MHz TOCSY Spectrum of **1a** in CDCl<sub>3</sub>  
 50 ms mixing time  
 268 K (-5 °C), 10 mM

Supporting Information

Current Data Parameters

USER slevin  
 NAME SL-7-233-800-H  
 EXPNO 3  
 PROCNO 1

F2 - Acquisition Parameters

Date\_ 20070206  
 Time\_ 0.00  
 INSTRUM varian  
 PROBHD 40-5mm broadband  
 PULPROG wgtocsy\_bn  
 TD 4096  
 SOLVENT CDCl3  
 NS 16  
 DS 64  
 SWH 11001.101 Hz  
 FIDRES 2.685816 Hz  
 AQ 0.1862132 sec  
 RG 287.4  
 DW 45.450 usec  
 DE 6.00 usec  
 TE 268.5 K

F1 - Acquisition Parameters

ND0 1  
 TD 1024  
 SFO1 799.8107 MHz  
 FIDRES 10.743262 Hz  
 SW 13.755 ppm  
 FMODE undefined

F2 - Processing parameters

SI 2048  
 SF 799.8064119 MHz  
 WDW QSI  
 SSB 2  
 LB 0.00 Hz  
 GB 0  
 PC 1.40

F1 - Processing parameters

SI 1024  
 MC2 States  
 SF 799.8064119 MHz  
 WDW QSI  
 SSB 2  
 LB 0.00 Hz  
 GB 0

S. Levin and J. S. Nowick

2D NMR plot parameters

CX2 15.00 cm  
 CX1 15.00 cm  
 F2PLO 5.663 ppm  
 F2LO 4528.96 Hz  
 F2PHI 4.366 ppm  
 F2HI 3492.23 Hz  
 F1PLO 2.237 ppm  
 F1LO 1789.43 Hz  
 F1PHI 0.357 ppm  
 F1HI 285.37 Hz  
 F2PFCM 0.08641 ppm/cm  
 F2H2CM 69.11497 Hz/cm  
 F1PFCM 0.12537 ppm/cm  
 F1H2CM 100.27044 Hz/cm

800 MHz TOCSY Spectrum of **1a** in CDCl<sub>3</sub>  
 50 ms mixing time  
 268 K (-5 °C), 10 mM

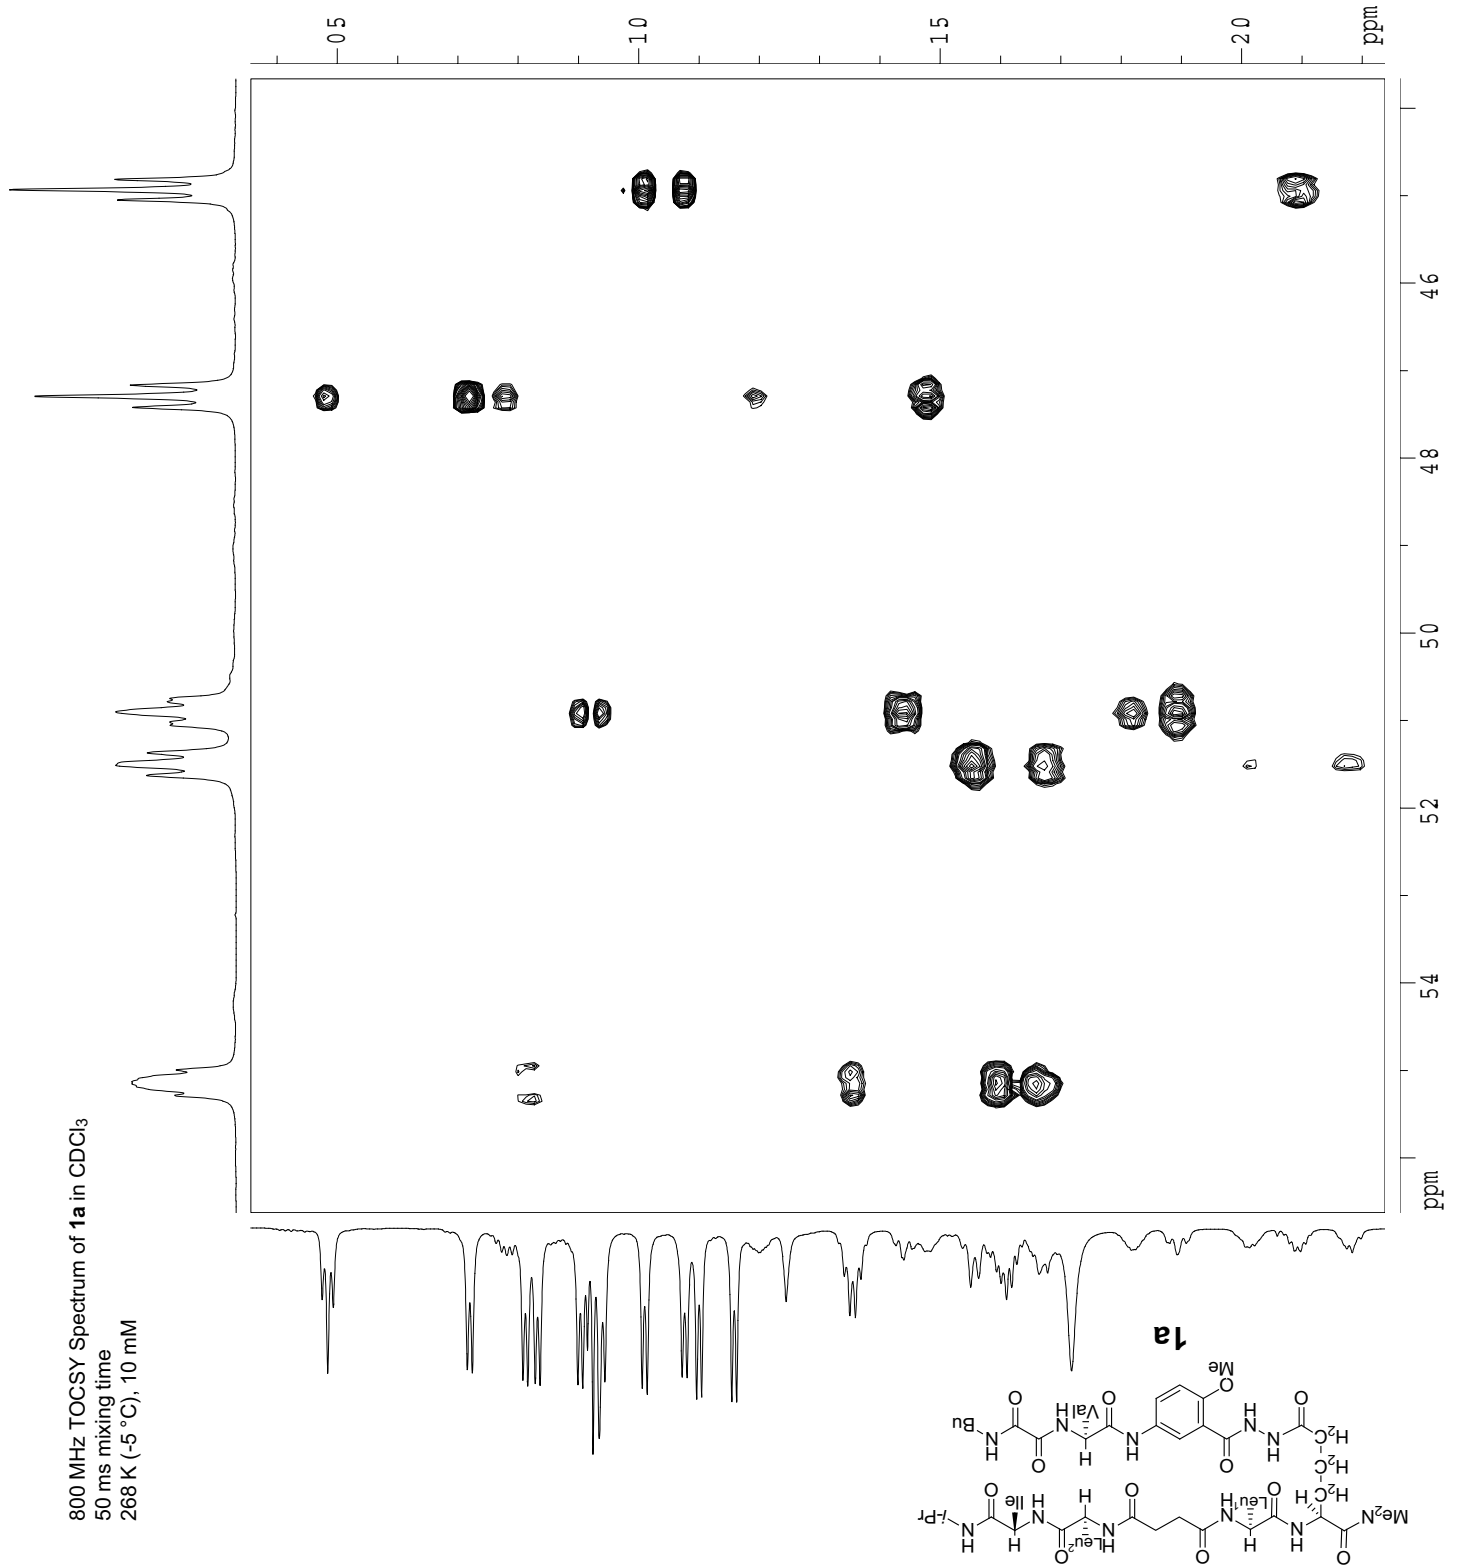





Current Data Parameters  
 USER slevin  
 NAME SL-7-233-800-H  
 EXPNO 4  
 PROCNO 1

## F2 - Acquisition Parameters

Date\_ 20070206  
 Time 0.00  
 INSTRUM varian  
 PROBHD 40:5mmbroadban  
 PULPROG noesyh2o\_pfg\_800\_pln  
 TD 4096  
 SOLVENT CDCl3  
 NS 16  
 DS 64  
 SWH 11001.101 Hz  
 FIDRES 2.685816 Hz  
 AQ 0.1862132 sec  
 RG 128  
 DW 45.450 usec  
 DE 6.00 usec  
 TE 288.5 K

## F1 - Acquisition Parameters

ND0 1  
 TD 1024  
 SF01 799.8107 MHz  
 FIDRES 10.743262 Hz  
 SW 13.755 ppm  
 FhMODE undefined

## F2 - Processing parameters

SI 2048  
 SF 799.8064119 MHz  
 WDW QSI  
 SSB 2  
 LB 0.00 Hz  
 GB 0  
 PC 1.40

## F1 - Processing parameters

SI 1024  
 MC2 States  
 SF 799.8064119 MHz  
 WDW QSI  
 SSB 2  
 LB 0.00 Hz  
 GB 0

## 2D NMR plot parameters

CX2 15.00 cm  
 CX1 15.00 cm  
 F2PLO 11.000 ppm  
 F2LO 8797.87 Hz  
 F2PHI -0.100 ppm  
 F2HI -79.98 Hz  
 F1PLO 11.000 ppm  
 F1LO 8797.87 Hz  
 F1PHI -0.100 ppm  
 F1HI -79.98 Hz  
 F2PPMCM 0.74000 ppm/cm  
 F2HZCM 591.85669 Hz/cm  
 F1PPMCM 0.74000 ppm/cm  
 F1HZCM 591.85669 Hz/cm

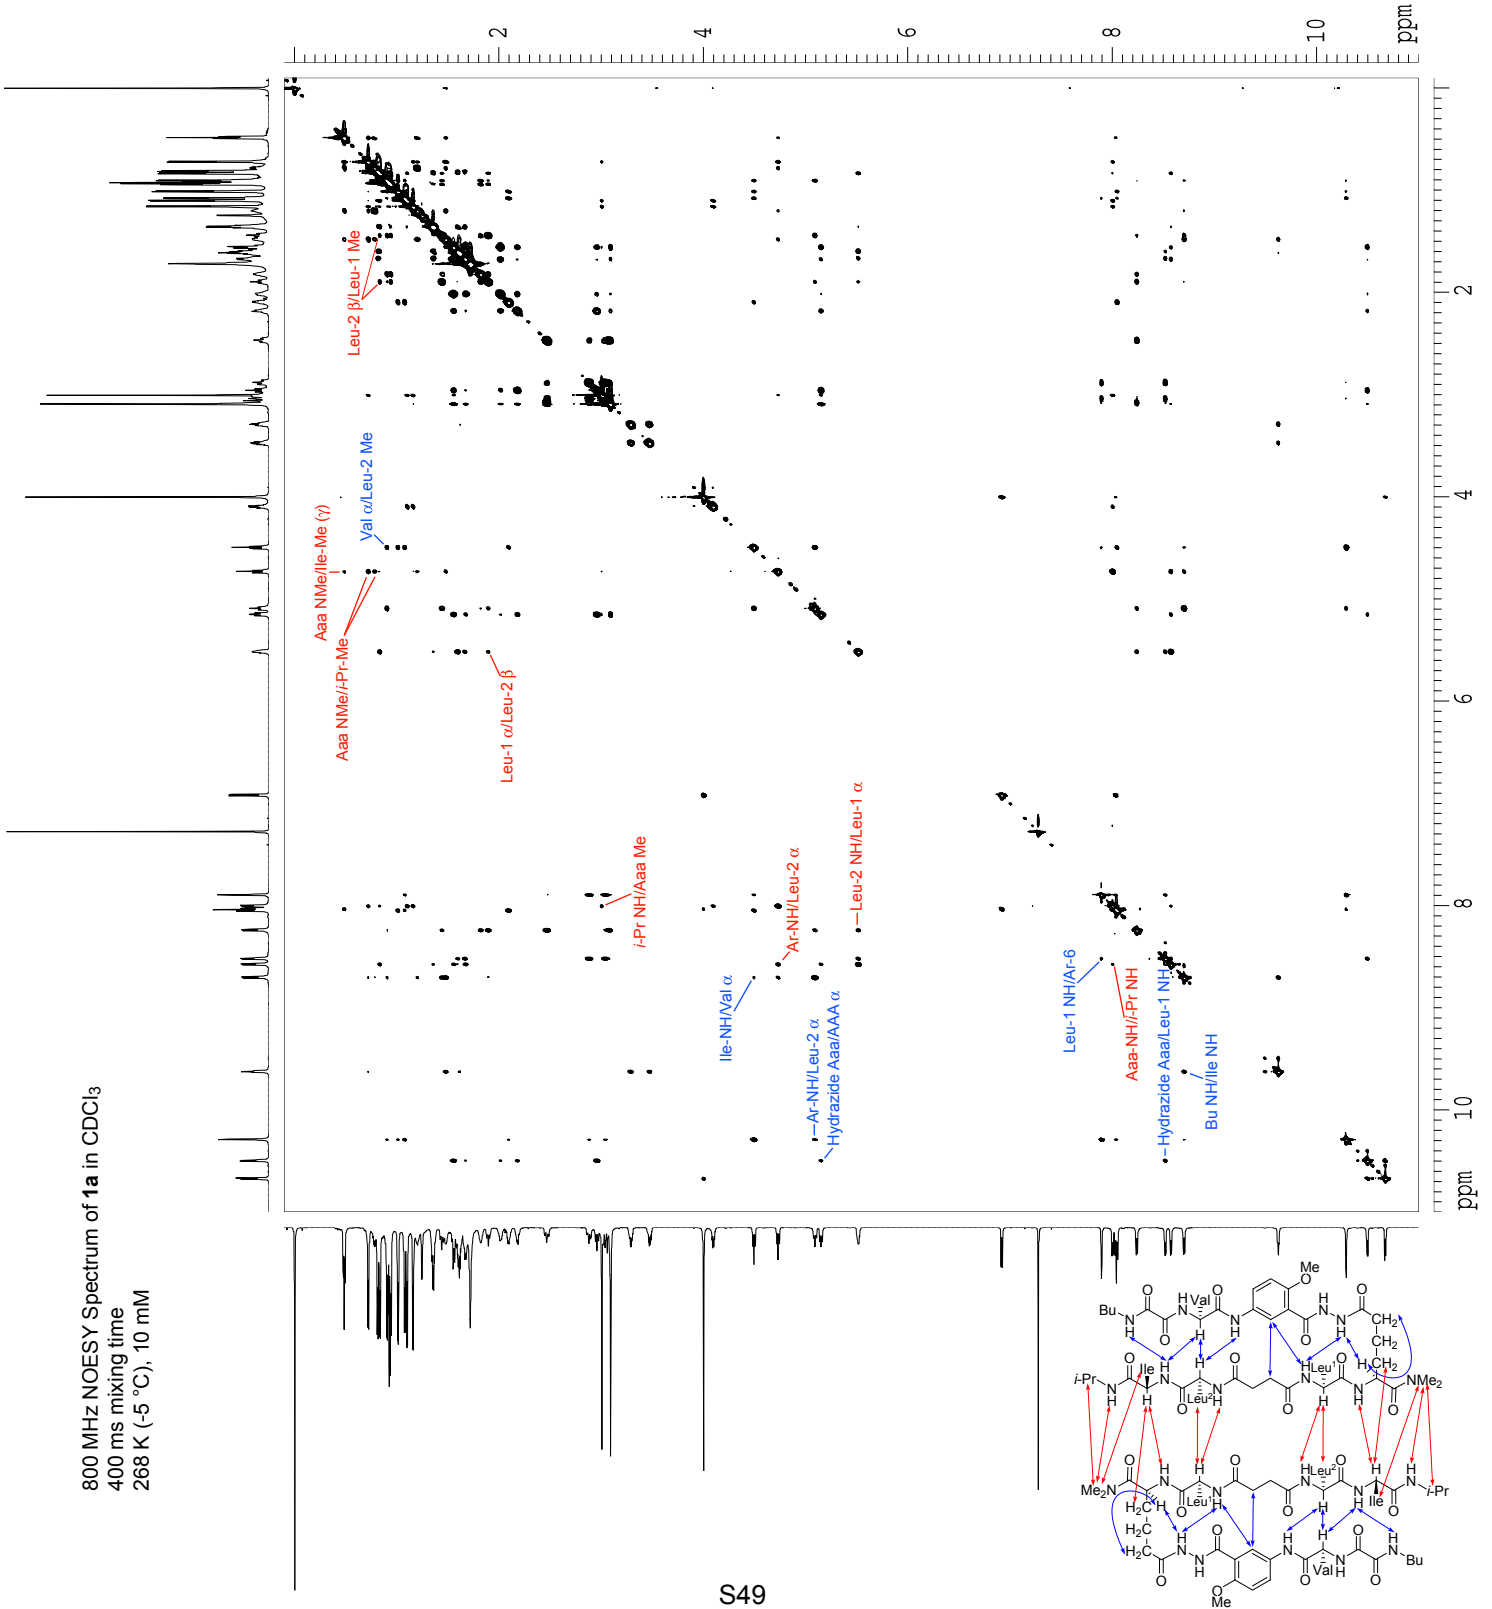

Current Data Parameters  
 USER slevin  
 NAME SL-7-233-800-H  
 EXPNO 4  
 PROCNO 1

## F2 - Acquisition Parameters

Date 20070206  
 Time\_ 0.00  
 INSTRUM varian  
 PROBHD 40:5mm broadband  
 PULPROG noesyh2o\_pfg\_800\_pln  
 TD 4096  
 SOLVENT CDCl<sub>3</sub>  
 NS 16  
 DS 64  
 SWH 11001.101 Hz  
 FIDRES 2.685816 Hz  
 AQ 0.1862132 sec  
 RG 128  
 DW 45.450 usec  
 DE 6.00 usec  
 TE 268.5 K

## F1 - Acquisition Parameters

ND0 1  
 TD 1024  
 SF01 799.8107 MHz  
 FIDRES 10.743262 Hz  
 SW 13.755 ppm  
 FhMODE undefined

## F2 - Processing parameters

SI 2048  
 SF 799.8064119 MHz  
 WDW QSI  
 SSB 2  
 LB 0.00 Hz  
 GB 0  
 PC 1.40

## F1 - Processing parameters

SI 2048  
 MC2 States  
 SF 799.8064119 MHz  
 WDW QSI  
 SSB 2  
 LB 0.00 Hz  
 GB 0

## 2D NMR plot parameters

CX2 15.00 cm  
 CX1 15.00 cm  
 F2PLO 5.600 ppm  
 F2LO 4478.92 Hz  
 F2PHI -0.100 ppm  
 F2HI -79.98 Hz  
 F1PLO 5.600 ppm  
 F1LO 4478.92 Hz  
 F1PHI -0.100 ppm  
 F1HI -79.98 Hz  
 F2PPMCM 0.38000 ppm/cm  
 F2HZCM 303.92645 Hz/cm  
 F1PPMCM 0.38000 ppm/cm  
 F1HZCM 303.92645 Hz/cm

800 MHz NOESY Spectrum of **1a** in CDCl<sub>3</sub>  
 400 ms mixing time  
 268 K (-5 °C), 10 mM

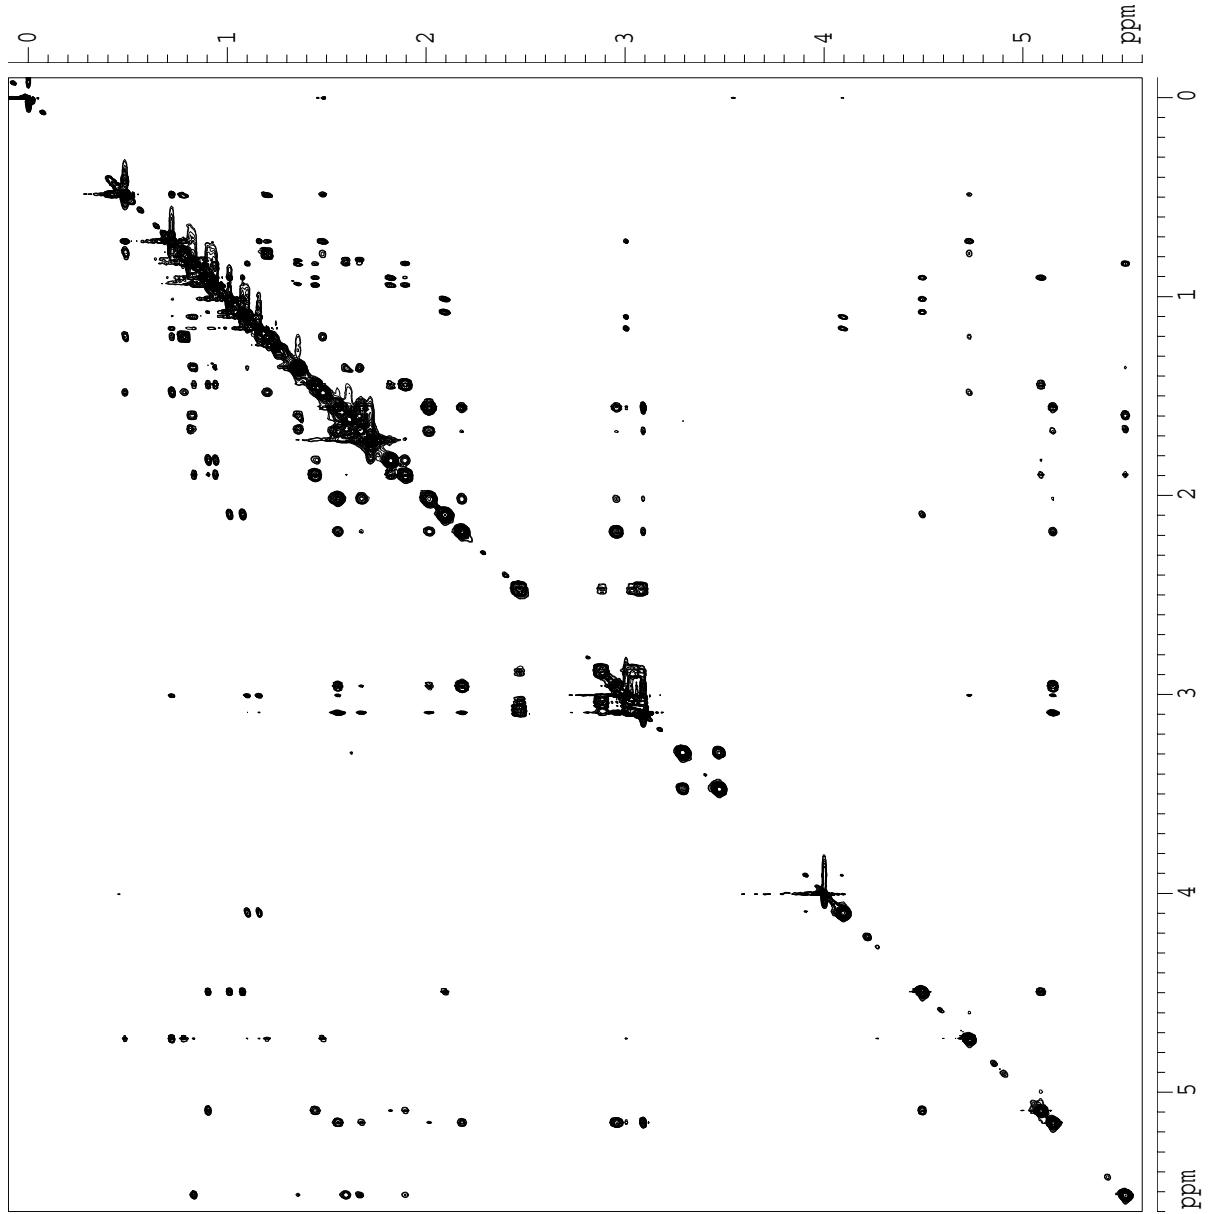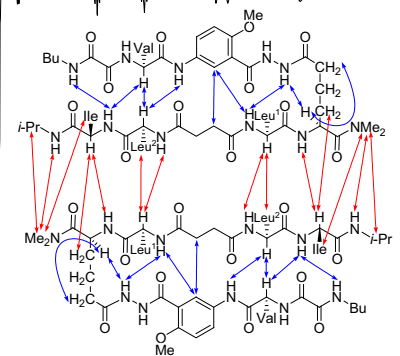

Supporting Information

Current Data Parameters

USER slevin  
 NAME SL-7-233-800-H  
 EXPNO 4  
 PROCNO 1

F2 - Acquisition Parameters

Date\_ 20070206  
 Time 0.00  
 INSTRUM varian  
 PROBDH 40:5mm broadband  
 PULPROG noesyh2o\_pfg\_800\_pln

TD 4096  
 SOLVENT CDCl3  
 NS 16  
 DS 64

SWH 11001.101 Hz  
 FIDRES 2.685816 Hz  
 AQ 0.1862132 sec  
 RG 128  
 DW 45.450 usec  
 DE 6.00 usec  
 TE 268.5 K

F1 - Acquisition Parameters

ND0 1  
 TD 1024  
 SF01 799.8107 MHz  
 FIDRES 10.743262 Hz  
 SW 13.755 ppm  
 F1MODE undefined

F2 - Processing parameters

SI 2048  
 SF 799.8064119 MHz  
 WDW QSI  
 SSB 2  
 LB 0.00 Hz  
 GB 0  
 PC 1.40

F1 - Processing parameters

SI 2048  
 MC2 States  
 SF 799.8064119 MHz  
 WDW QSI  
 SSB 2  
 LB 0.00 Hz  
 GB 0

2D NMR plot parameters

CX2 15.00 cm  
 CX1 15.00 cm  
 F2PLO 11.000 ppm  
 F2LO 8797.87 Hz  
 F2PHI 5.600 ppm  
 F2HI 4478.92 Hz  
 F1PLO 5.602 ppm  
 F1LO 4480.61 Hz  
 F1PHI -0.107 ppm  
 F1HI -85.27 Hz  
 F2PPMCM 0.36000 ppm/cm  
 F2HZCM 287.93030 Hz/cm  
 F1PPMCM 0.38058 ppm/cm  
 F1HZCM 304.39243 Hz/cm

800 MHz NOESY Spectrum of **1a** in CDCl<sub>3</sub>  
 400 ms mixing time  
 268 K (-5 °C), 10 mM

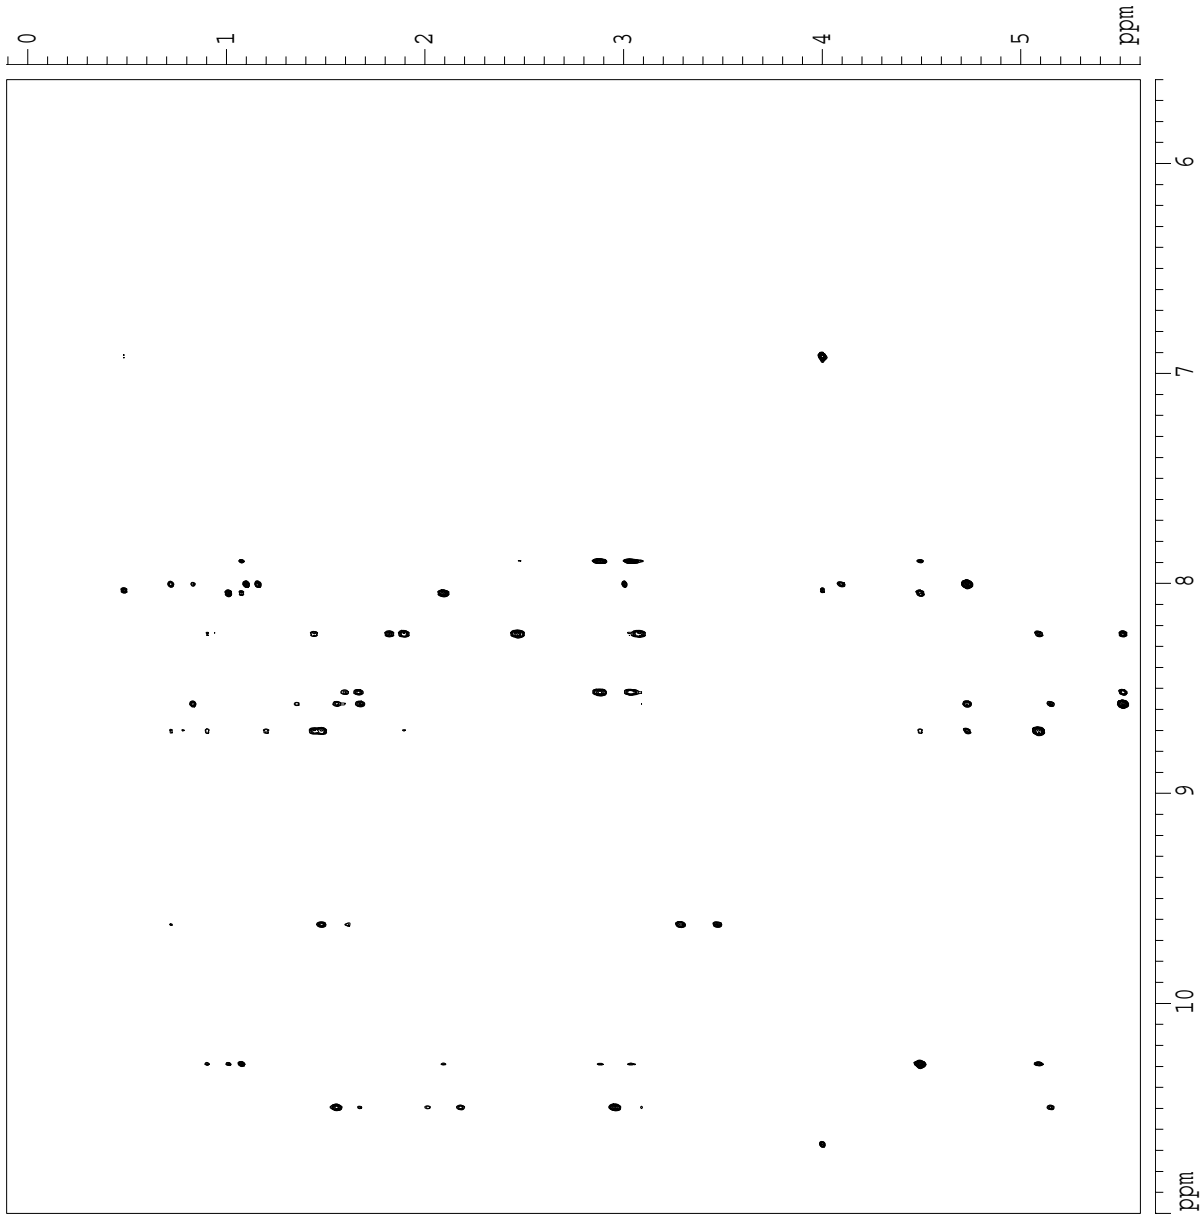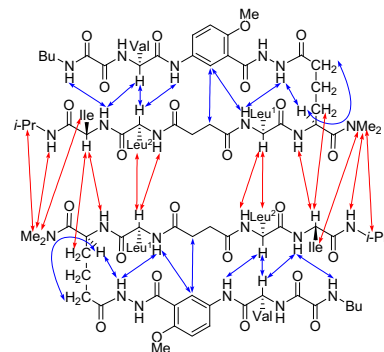

Supporting Information

S. Levin and J. S. Nowick

Current Data Parameters  
 USER slevin  
 NAME SL-7-233-800-H  
 EXPNO 4  
 PROCNO 1

F2 - Acquisition Parameters  
 Date\_ 20070206  
 Time 0.00  
 INSTRUM varian  
 PROBHD 40:5mmBroadban  
 PULPROG noesyh2o\_pfg\_800\_p1n  
 TD 4096  
 SOLVENT CDCl3  
 NS 16  
 DS 64  
 SWH 11001.101 Hz  
 FIDRES 2.685816 Hz  
 AQ 0.1862132 sec  
 RG 128  
 DW 45.450 usec  
 DE 6.00 usec  
 TE 288.5 K

F1 - Acquisition parameters  
 ND0 1  
 TD 1024  
 SF01 799.8107 MHz  
 FIDRES 10.743262 Hz  
 SW 13.755 ppm  
 FMODE undefined

F2 - Processing parameters  
 SI 2048  
 SF 799.8064119 MHz  
 WDW QSI  
 SSB 2  
 LB 0.00 Hz  
 GB 0  
 PC 1.40

F1 - Processing parameters  
 SI 2048  
 MC2 States  
 SF 799.8064119 MHz  
 WDW QSI  
 SSB 2  
 LB 0.00 Hz  
 GB 0

2D NMR plot parameters  
 CX2 15.00 cm  
 CX1 15.00 cm  
 F2PLO 11.009 ppm  
 F2LO 8804.78 Hz  
 F2PHI 5.600 ppm  
 F2HI 4478.92 Hz  
 F1PLO 11.002 ppm  
 F1LO 8799.40 Hz  
 F1PHI 5.600 ppm  
 F1HI 4478.92 Hz  
 F2PPMCM 0.36058 ppm/cm  
 F2HZCM 288.39066 Hz/cm  
 F1PPMCM 0.36013 ppm/cm  
 F1HZCM 288.03253 Hz/cm

800 MHz NOESY Spectrum of **1a** in CDCl<sub>3</sub>  
 400 ms mixing time  
 268 K (-5 °C), 10 mM

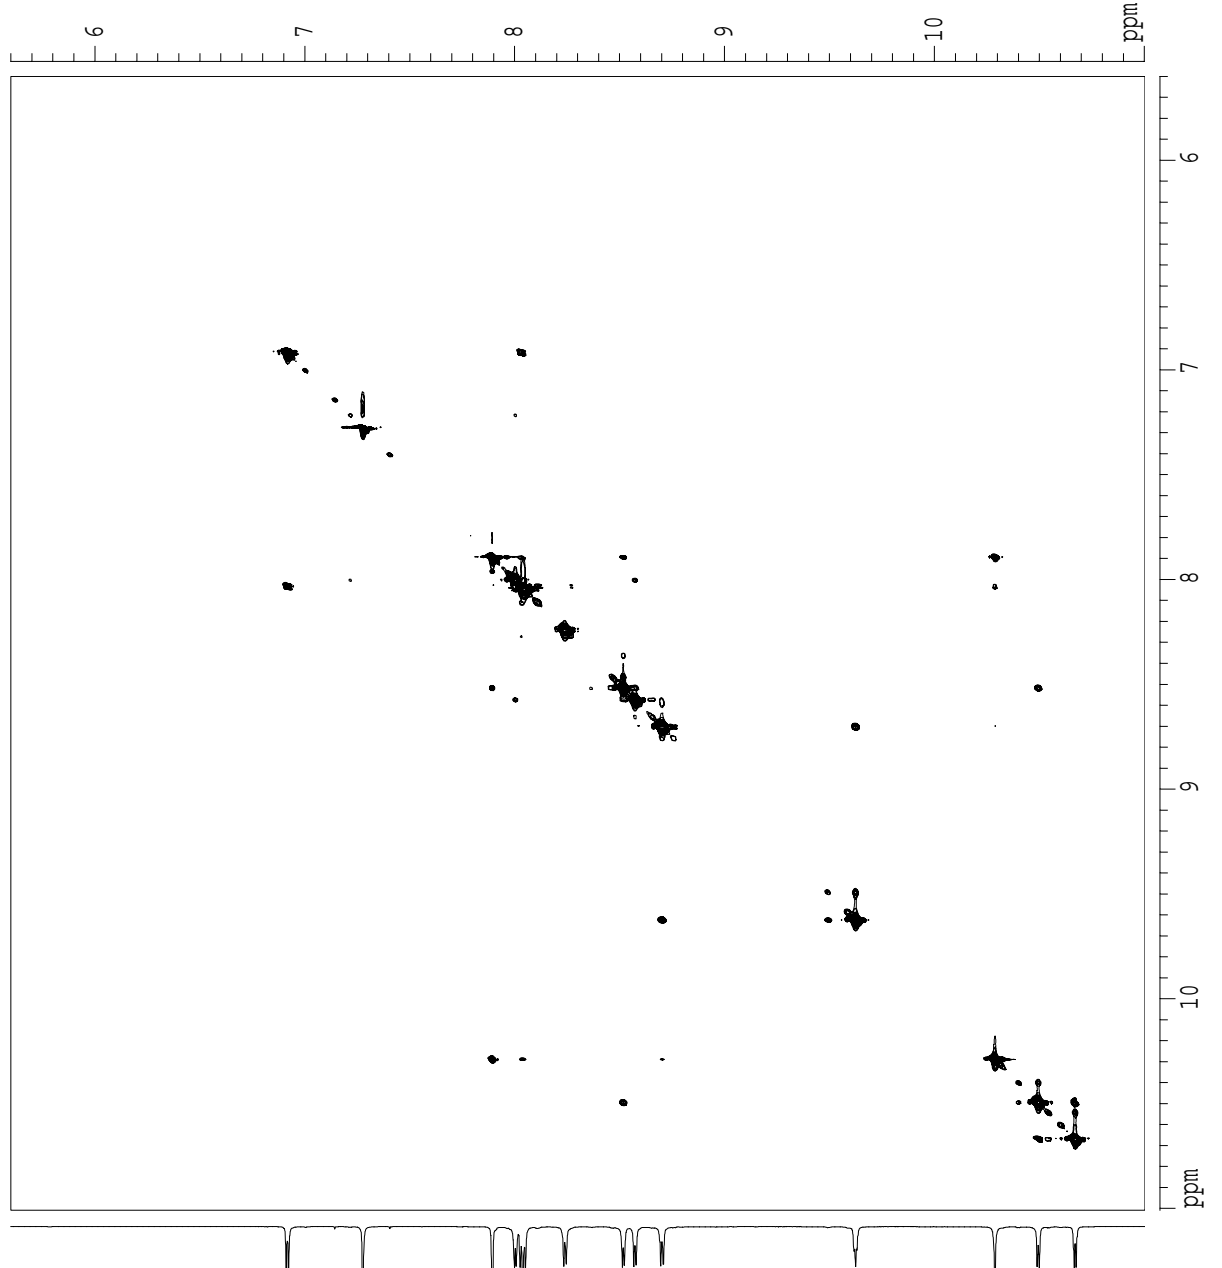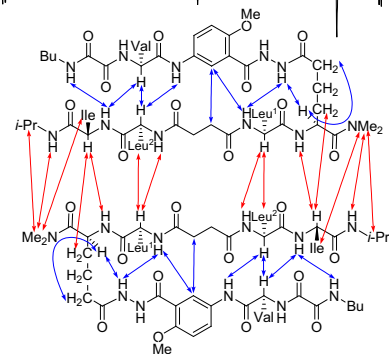

Supporting Information

S. Levin and J. S. Nowick

800 MHz NOESY Spectrum of **1a** in CDCl<sub>3</sub>  
 400 ms mixing time  
 268 K (-5 °C), 10 mM

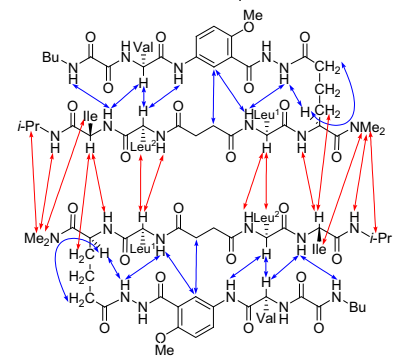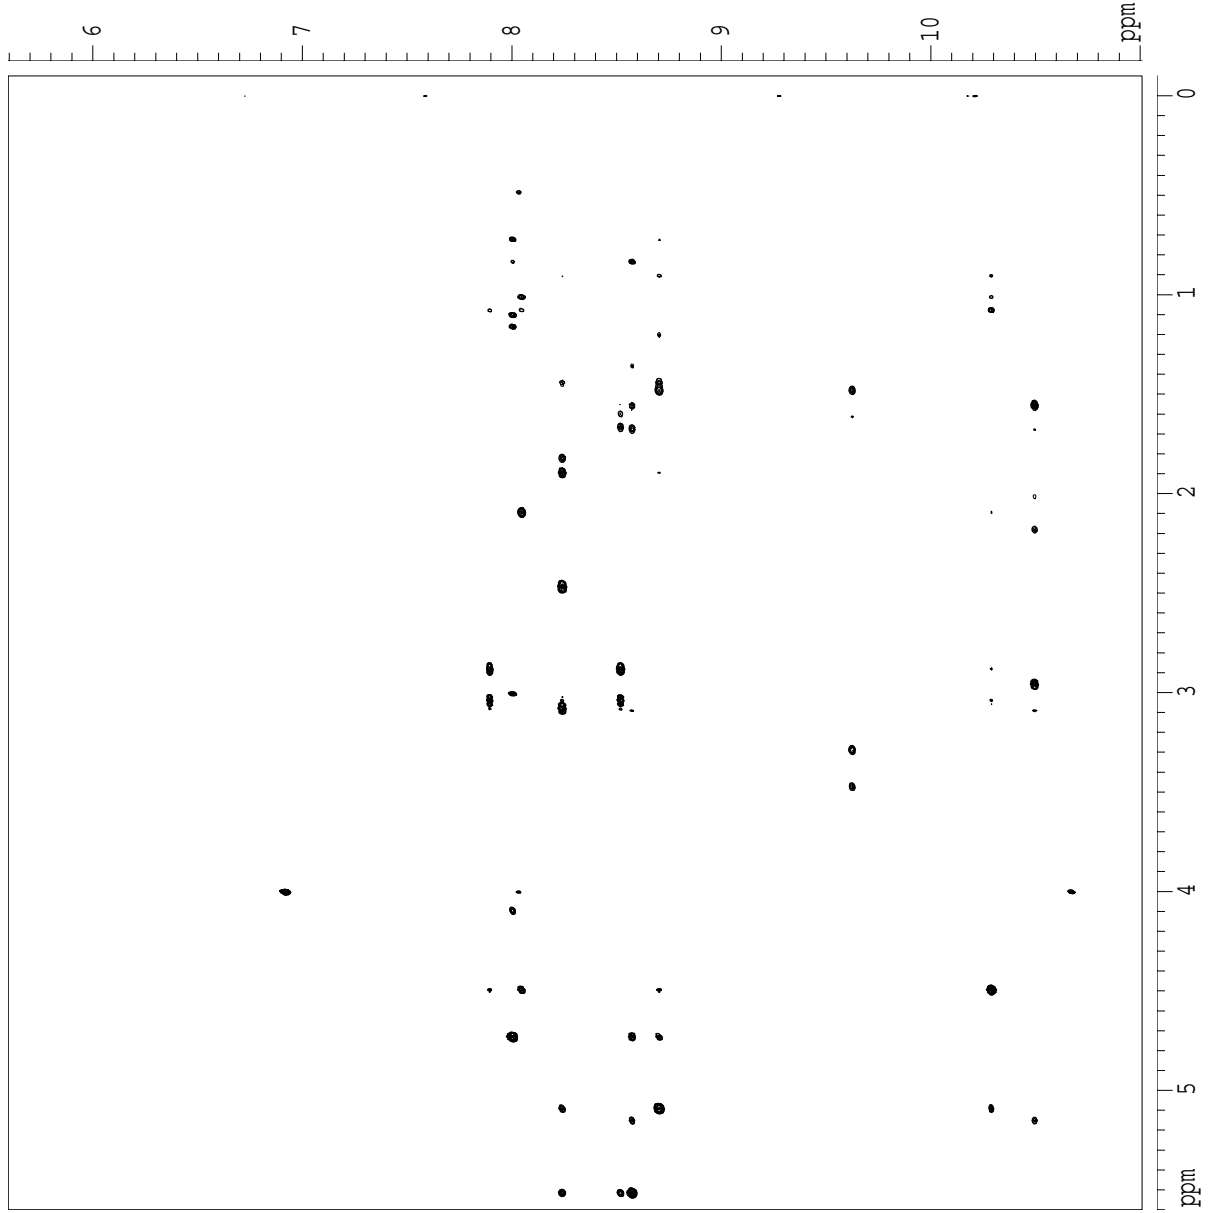

Current Data Parameters  
 USER slevin  
 NAME SL-7-233-800-H  
 EXPNO 4  
 PROCNO 1

F2 - Acquisition Parameters  
 Date\_ 20070206  
 Time 0.00  
 INSTRUM varian  
 PROBHD 40:5mmBroadban  
 PULPROG noesyh2o\_pfg\_800\_p1n  
 TD 4096  
 SOLVENT CDCl3  
 NS 16  
 DS 64  
 SWH 11001.101 Hz  
 FIDRES 2.685816 Hz  
 AQ 0.1862132 sec  
 RG 128  
 DW 45.450 usec  
 DE 6.00 usec  
 TE 268.5 K

F1 - Acquisition Parameters  
 ND0 1  
 TD 1024  
 SF01 799.8107 MHz  
 FIDRES 10.743262 Hz  
 SW 13.755 ppm  
 F1MODE undefined

F2 - Processing parameters  
 SI 2048  
 SF 799.8064119 MHz  
 WDW QSI  
 SSB 2  
 LB 0.00 Hz  
 GB 0  
 PC 1.40

F1 - Processing parameters  
 SI 2048  
 MC2 States  
 SF 799.8064119 MHz  
 WDW QSI  
 SSB 2  
 LB 0.00 Hz  
 GB 0

2D NMR plot parameters  
 CX2 15.00 cm  
 CX1 15.00 cm  
 F2PLO 5.600 ppm  
 F2LO 4478.92 Hz  
 F2PHI -0.100 ppm  
 F2HI -79.98 Hz  
 F1PLO 11.009 ppm  
 F1LO 8804.78 Hz  
 F1PHI 5.595 ppm  
 F1HI 4475.24 Hz  
 F2PPMCM 0.38000 ppm/cm  
 F2HZCM 303.92645 Hz/cm  
 F1PPMCM 0.36088 ppm/cm  
 F1HZCM 288.63562 Hz/cm

Supporting Information

S. Levin and J. S. Nowick

Current Data Parameters  
 USER slevin  
 NAME SL-7-233-800-H  
 EXPNO 4  
 PROCNO 1

F2 - Acquisition Parameters

Date\_ 20070206  
 Time\_ 0.00  
 INSTRUM varian  
 PROBHD 40:5mm broadband  
 PULPROG noesyh2o\_pfg\_800\_pln  
 TD 4096  
 SOLVENT CDCl3  
 NS 16  
 DS 64  
 SMH 11001.101 Hz  
 FIDRES 2.685816 Hz  
 AQ 0.1862132 sec  
 RG 128  
 DW 45.450 usec  
 DE 6.00 usec  
 TE 268.5 K

F1 - Acquisition Parameters

ND0 1  
 TD 1024  
 SFO1 799.8107 MHz  
 FIDRES 10.743262 Hz  
 SW 13.755 ppm  
 F1MODE undefined

F2 - Processing parameters

SI 2048  
 SF 799.8064119 MHz  
 WDW QSI  
 SSB 2  
 LB 0.00 Hz  
 GB 0  
 PC 1.40

F1 - Processing parameters

SI 1024  
 MC2 States  
 SF 799.8064119 MHz  
 WDW QSI  
 SSB 2  
 LB 0.00 Hz  
 GB 0

2D NMR plot parameters

CX2 15.00 cm  
 CX1 15.00 cm  
 F2PLO 5.689 ppm  
 F2LO 4550.44 Hz  
 F2PHI 3.930 ppm  
 F2HI 3143.08 Hz  
 F1PLO 2.318 ppm  
 F1LO 1853.89 Hz  
 F1PHI 0.384 ppm  
 F1HI 306.86 Hz  
 F2P1MCM 0.11731 ppm/cm  
 F2H1MCM 93.82449 Hz/cm  
 F1P1MCM 0.12895 ppm/cm  
 F1H1MCM 103.13531 Hz/cm

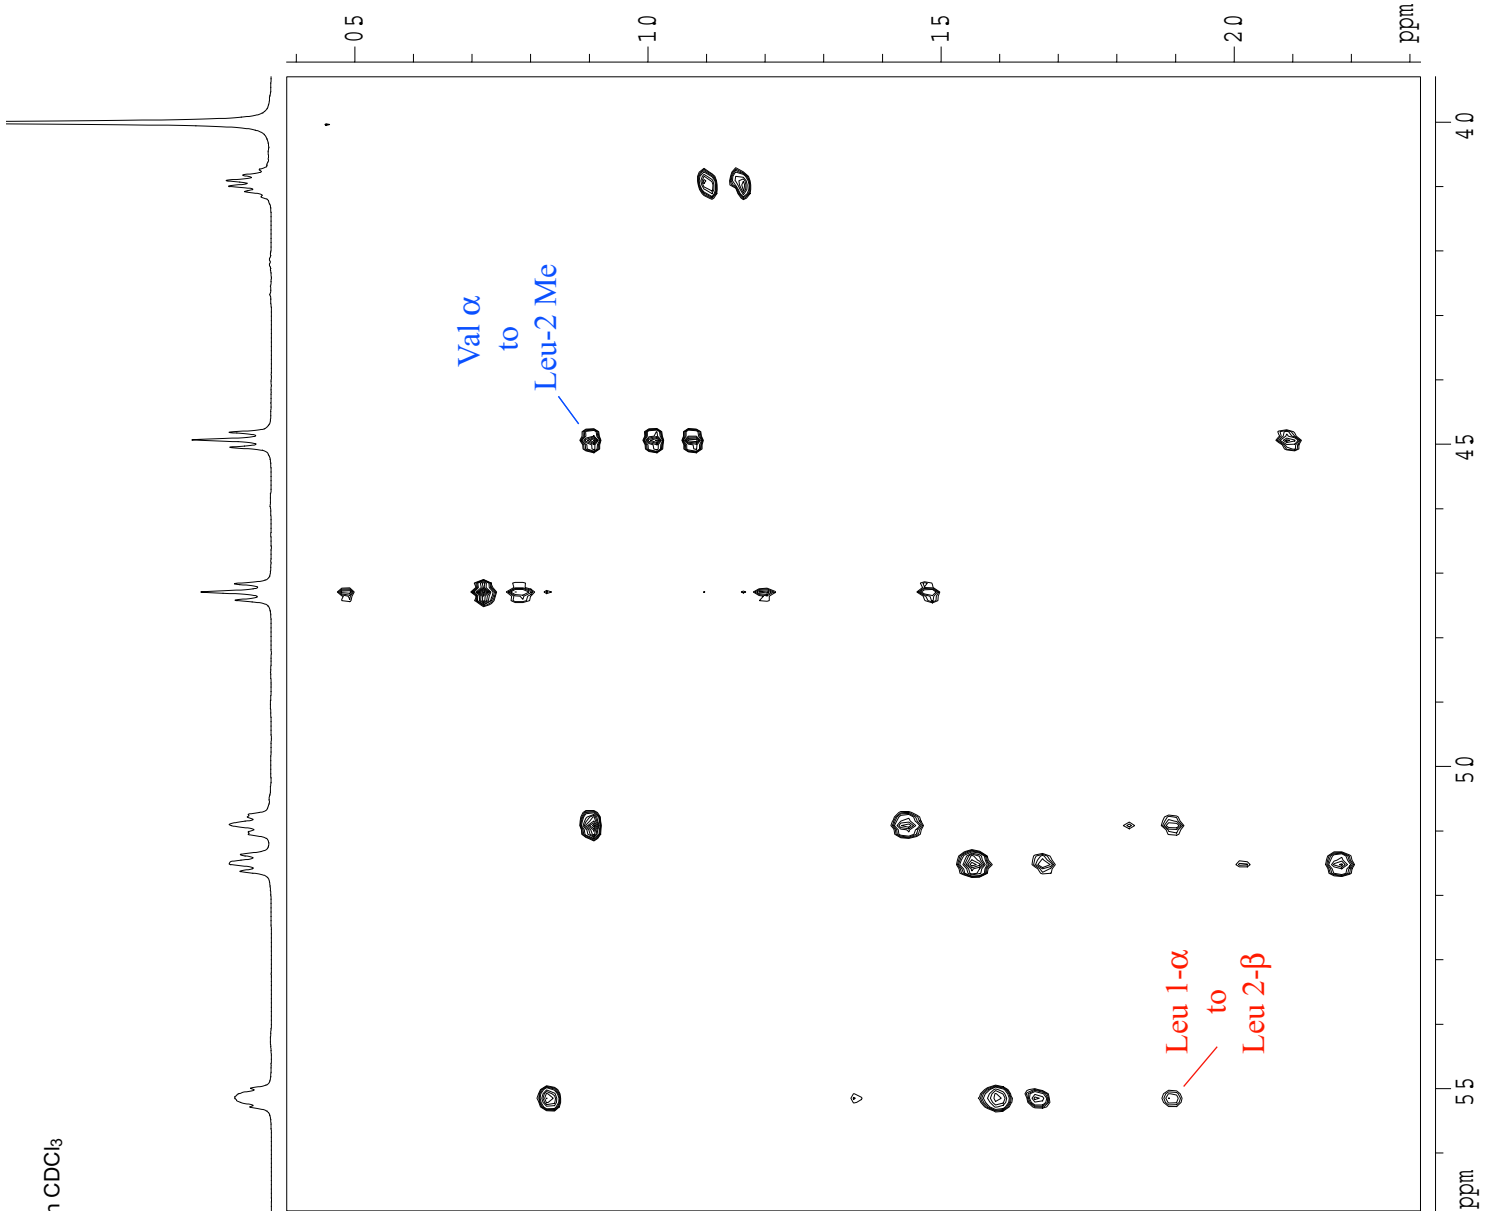

800 MHz NOESY Spectrum of **1a** in CDCl<sub>3</sub>  
 400 ms mixing time  
 268 K (-5 °C), 10 mM

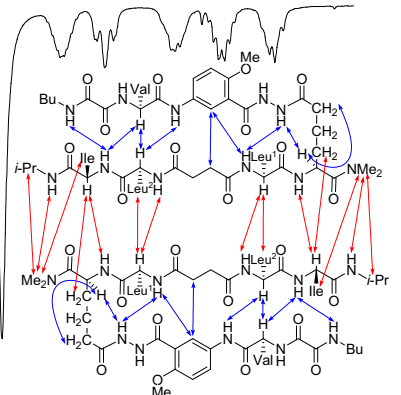

Supporting Information

Current Data Parameters  
 USER slewin  
 NAME SL-7-233-800-H  
 EXPNO 4  
 PROCNO 1

F2 - Acquisition Parameters

Date\_ 20070206  
 Time\_ 0.00  
 INSTRUM varian  
 PROBD 40:5mmbroadban  
 PULPROG noesyh2o\_pfg\_800\_pln  
 TD 4096  
 SOLVENT CDCl3  
 NS 16  
 DS 64  
 SWH 11001.101 Hz  
 FIDRES 2.685816 Hz  
 AQ 0.1862132 sec  
 RG 128  
 DM 45.450 usec  
 DE 6.00 usec  
 TE 268.5 K

F1 - Acquisition parameters

ND0 1  
 TD 1024  
 SF01 799.8107 MHz  
 FIDRES 10.743262 Hz  
 SW 13.755 ppm  
 FMODE undefined

F2 - Processing parameters

SI 2048  
 SF 799.8064119 MHz  
 WDM QSINE  
 SSB 2  
 LB 0.00 Hz  
 GB 0  
 PC 1.40

F1 - Processing parameters

SI 1024  
 MC2 States  
 SF 799.8064119 MHz  
 WDM QSINE  
 SSB 2  
 LB 0.00 Hz  
 GB 0

2D NMR plot parameters

CX2 15.00 cm  
 CX1 15.00 cm  
 F2PLO 3.131 ppm  
 F2LO 2503.85 Hz  
 F2PHI 2.842 ppm  
 F2HI 2272.87 Hz  
 F1PLO 2.640 ppm  
 F1LO 2111.72 Hz  
 F1PHI 0.666 ppm  
 F1HI 532.46 Hz  
 F2PFCM 0.01925 ppm/cm  
 F2HZCM 15.39867 Hz/cm  
 F1PFCM 0.13164 ppm/cm  
 F1HZCM 105.28397 Hz/cm

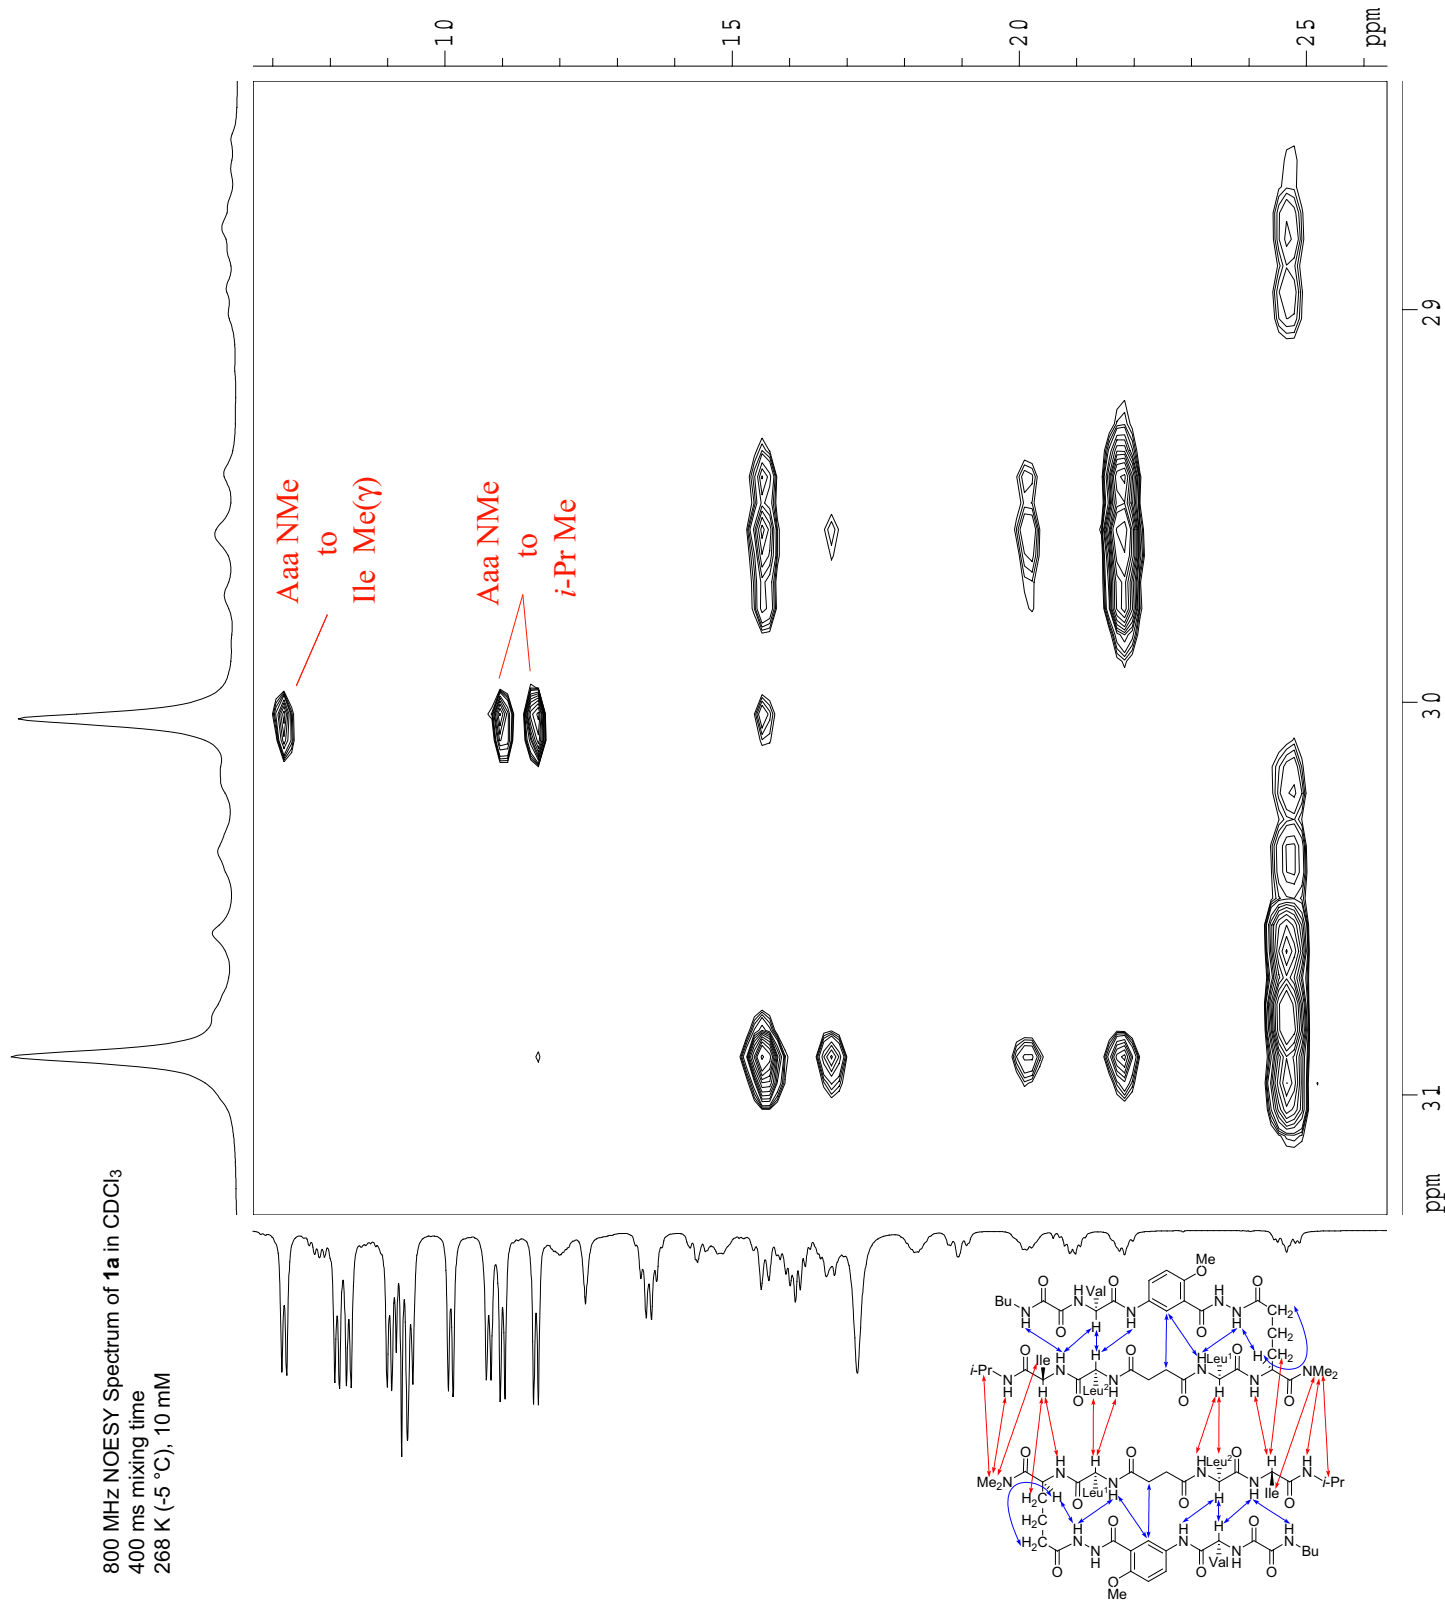

800 MHz NOESY Spectrum of **1a** in CDCl<sub>3</sub>  
 400 ms mixing time  
 268 K (-5 °C), 10 mM

Supporting Information

Current Data Parameters  
 USER slevin  
 NAME SL-7-233-800-H  
 EXNO 4  
 PROCNO 1

F2 - Acquisition Parameters

Date\_ 20070206  
 Time\_ 0.00  
 INSTRUM varian  
 PROBHD 40:5mm broadband  
 PULPROG noesyh2o\_pfg\_800\_pln  
 TD 4096

SOLVENT CDCl3  
 NS 16  
 DS 64  
 SWH 11001.101 Hz  
 FIDRES 2.685816 Hz  
 AQ 0.1862132 sec  
 RG 128  
 DW 45.450 usec  
 DE 6.00 usec  
 TE 268.5 K

F1 - Acquisition parameters

ND0 1  
 TD 1024  
 SF01 799.8107 MHz  
 FIDRES 10.743262 Hz  
 SW 13.755 ppm  
 FwMODE undefined

F2 - Processing parameters

SI 2048  
 SF 799.8064119 MHz  
 WDW QSI  
 SSB 2  
 LB 0.00 Hz  
 GB 0  
 PC 1.40

F1 - Processing parameters

SI 1024  
 MC2 States  
 SF 799.8064119 MHz  
 WDW QSI  
 SSB 2  
 LB 0.00 Hz  
 GB 0

2D NMR plot parameters

CX2 15.00 cm  
 CX1 15.00 cm  
 F2PLO 10.861 ppm  
 F2LO 8686.60 Hz  
 F2PHI 7.785 ppm  
 F2FI 6226.39 Hz  
 F1PLO 5.595 ppm  
 F1LO 4475.24 Hz  
 F1PHI 3.863 ppm  
 F1FI 3089.36 Hz  
 F2PPCM 0.20507 ppm/cm  
 F2HZCM 164.01379 Hz/cm  
 F1PPCM 0.11552 ppm/cm  
 F1HZCM 92.39206 Hz/cm

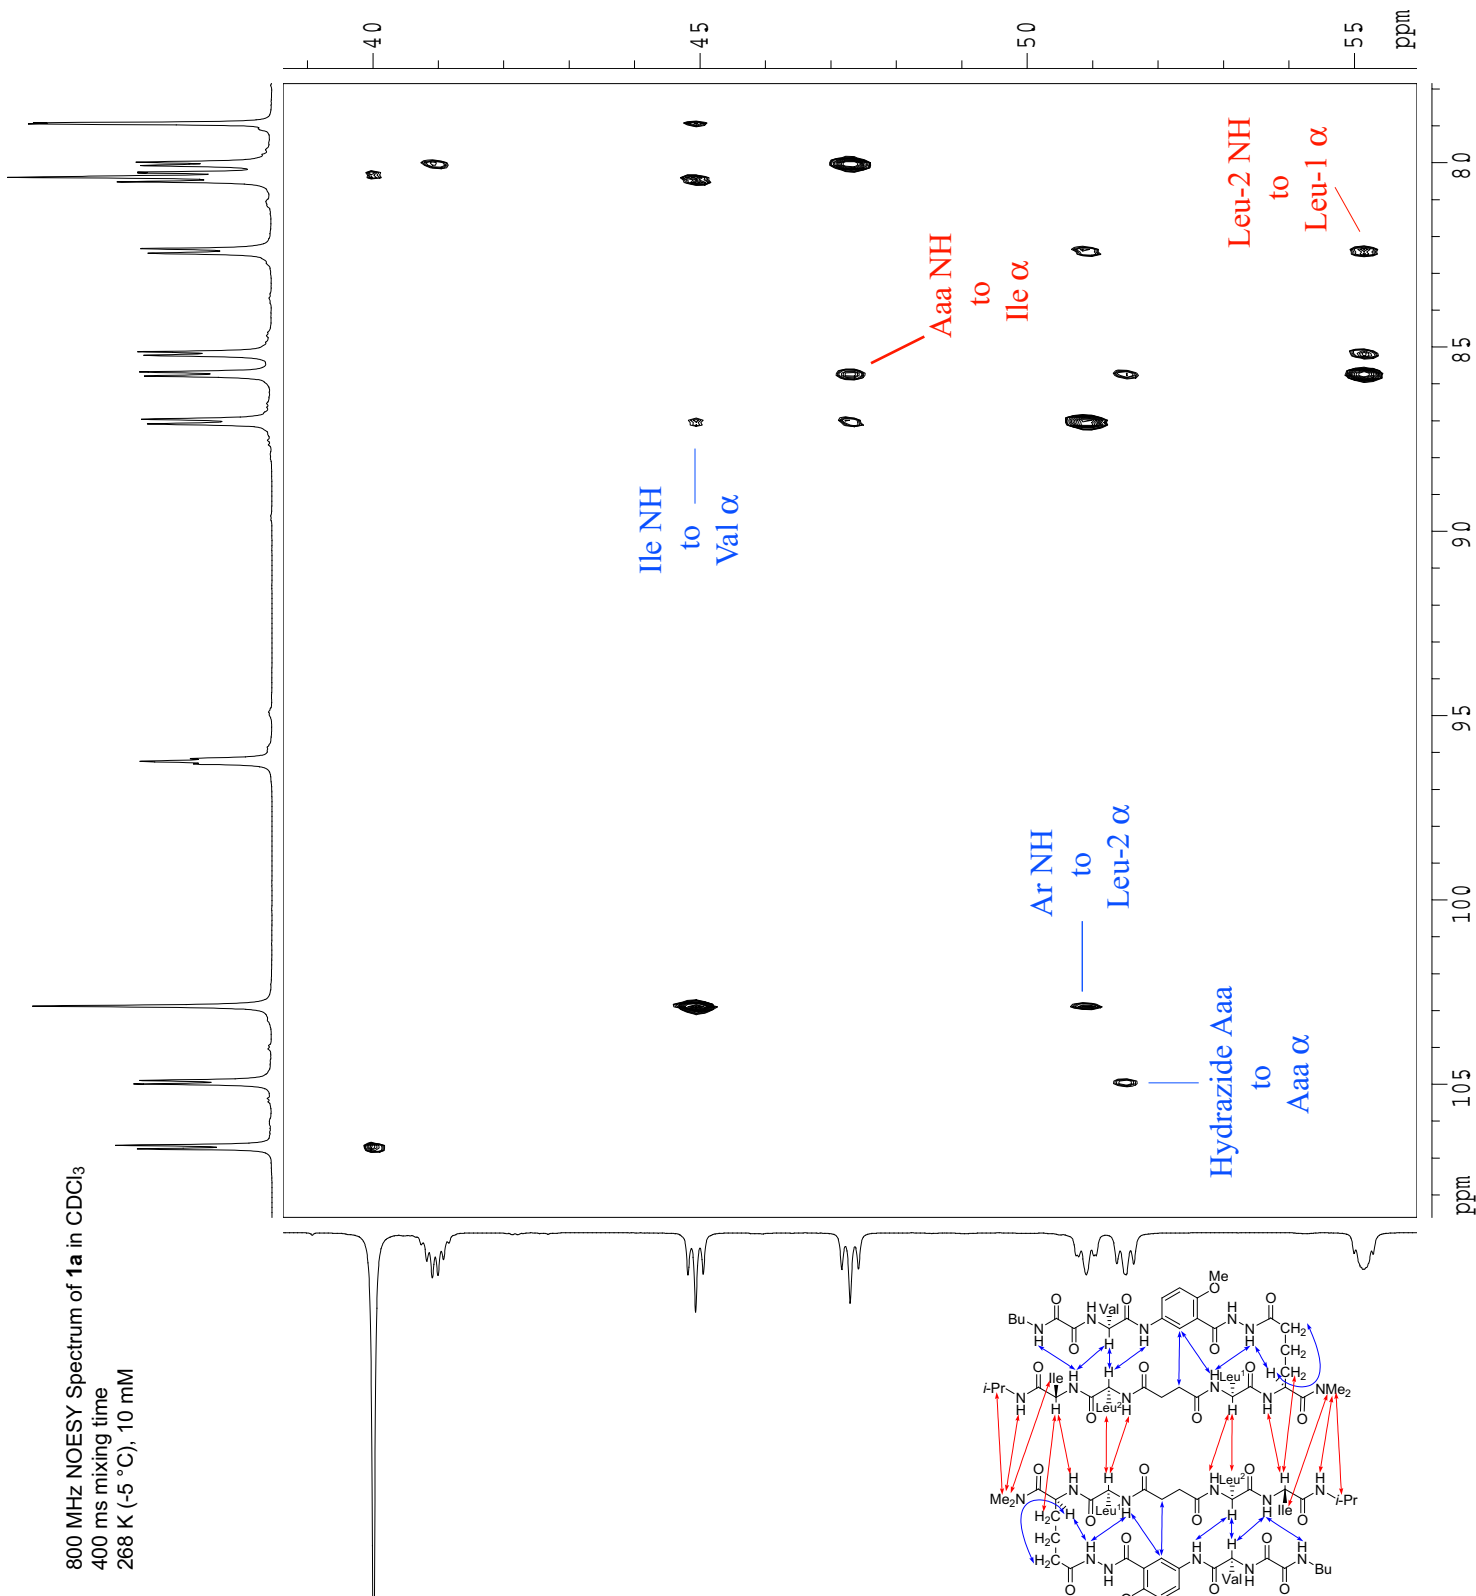



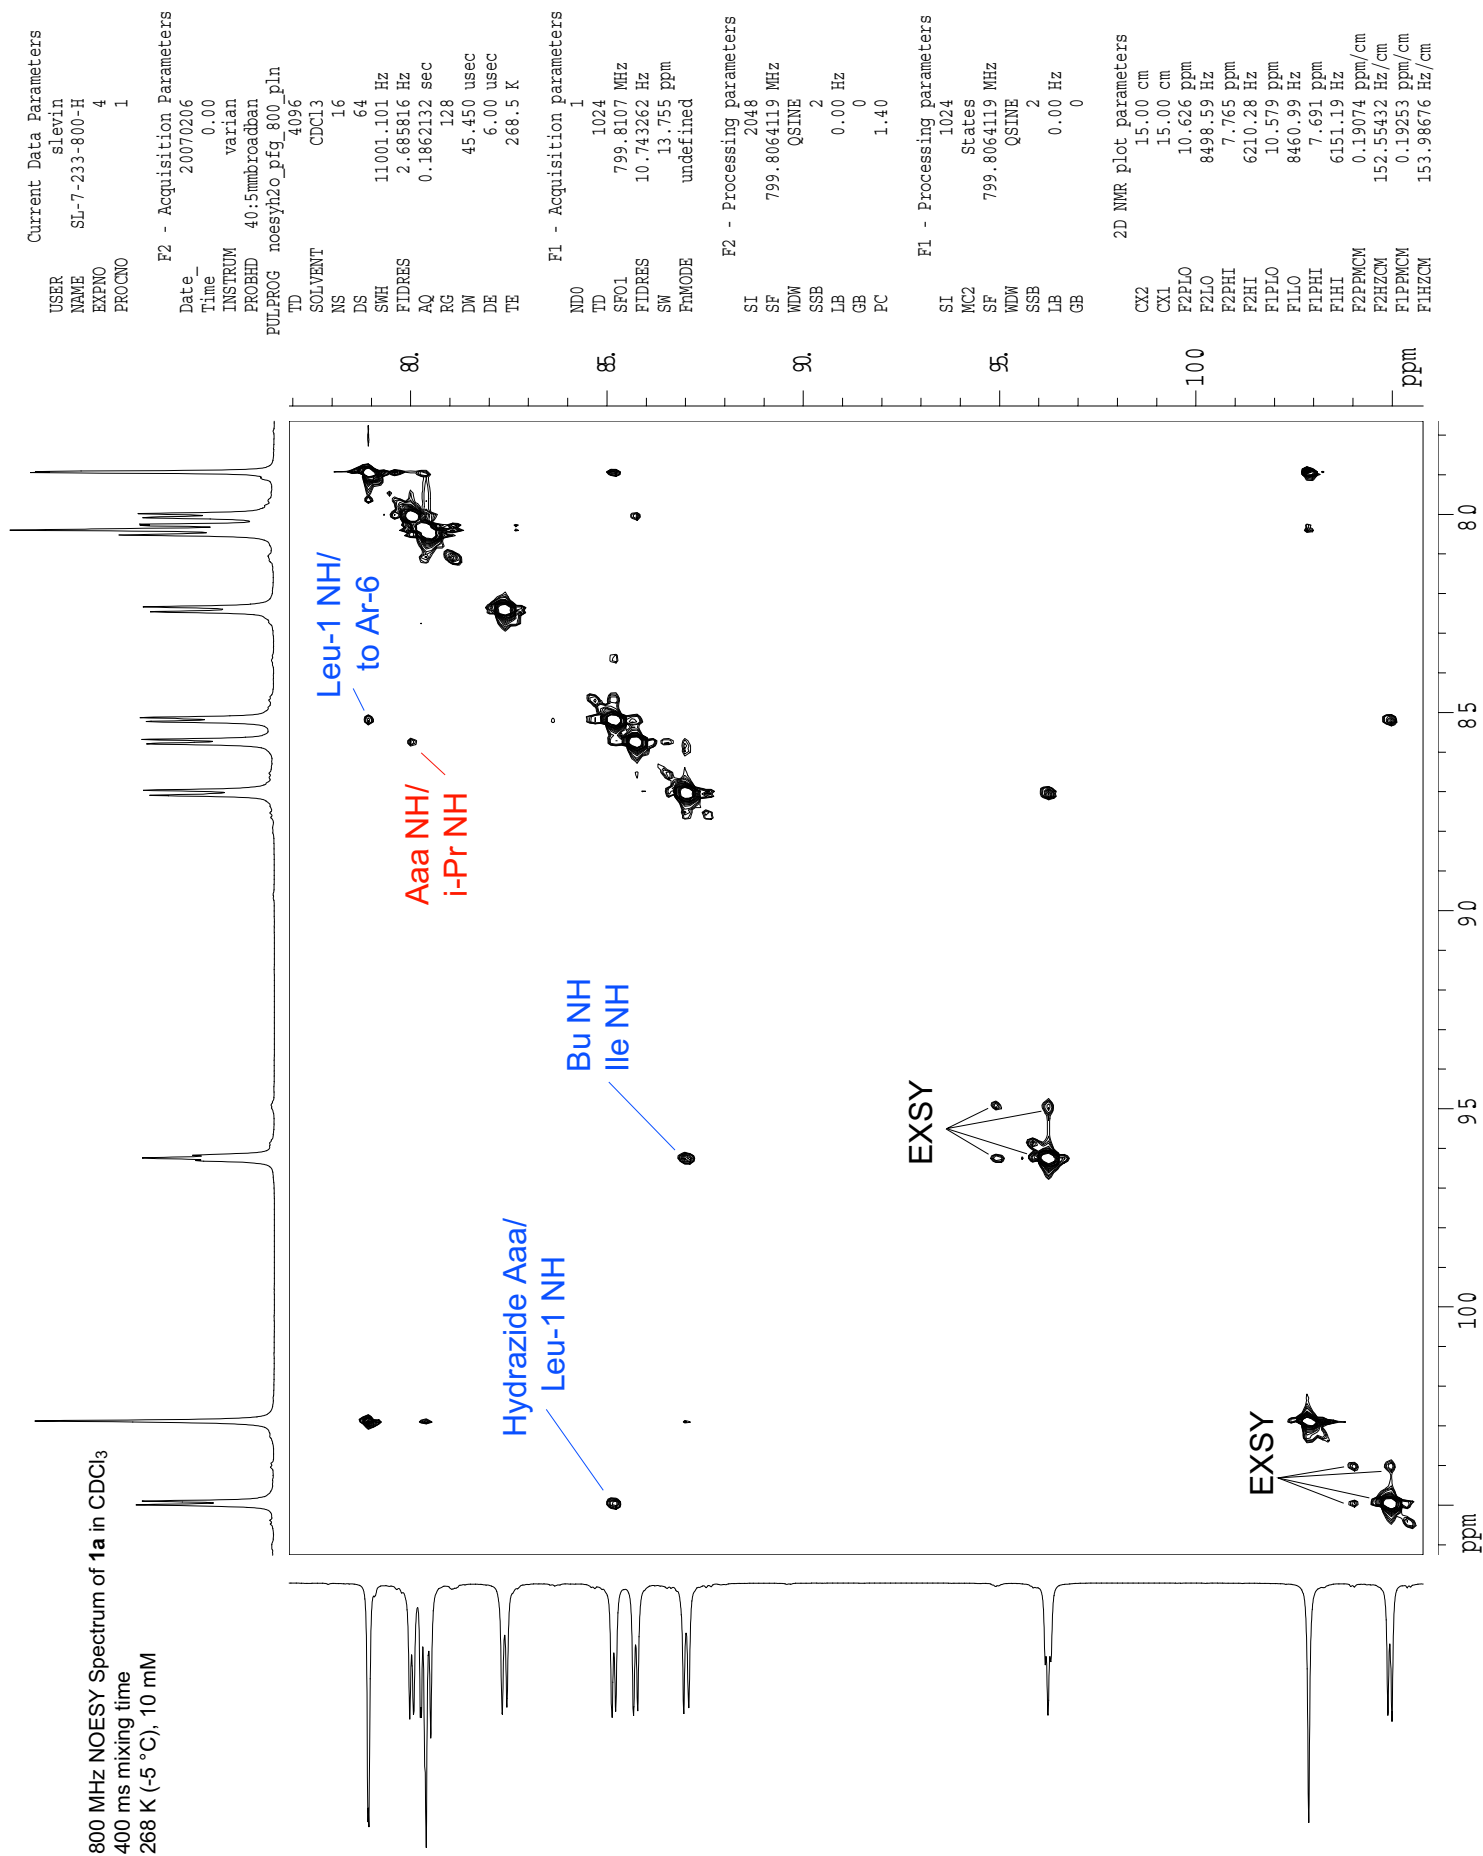

800 MHz NOESY Spectrum of **1a** in CDCl<sub>3</sub>  
 400 ms mixing time  
 268 K (-5 °C), 10 mM

Supporting Information

Current Data Parameters  
 USER slevin  
 NAME SL-7-233-800-H  
 EXPNO 4  
 PROCNO 1

F2 - Acquisition Parameters

Date\_ 20070206  
 Time\_ 0.00  
 INSTRUM varian  
 PROBHD 40:5mm broadband  
 PULPROG noesyh2o\_pfg\_800\_pln  
 TD 4096

SOLVENT CDCl<sub>3</sub>  
 NS 16  
 DS 64  
 SWH 11001.101 Hz  
 FIDRES 2.685816 Hz  
 AQ 0.1862132 sec  
 RG 128  
 DW 45.450 usec  
 DE 6.00 usec  
 TE 268.5 K

F1 - Acquisition parameters

ND0 1  
 TD 1024  
 SFO1 799.8107 MHz  
 FIDRES 10.743262 Hz  
 SW 13.755 ppm  
 FwMODE undefined

F2 - Processing parameters

SI 2048  
 SF 799.8064119 MHz  
 WDW QSINE  
 SSB 2  
 LB 0.00 Hz  
 GB 0  
 PC 1.40

F1 - Processing parameters

SI 1024  
 MC2 States  
 SF 799.8064119 MHz  
 WDW QSINE  
 SSB 2  
 LB 0.00 Hz  
 GB 0

2D NMR plot parameters

CX2 15.00 cm  
 CX1 15.00 cm  
 F2PLO 10.626 ppm  
 F2LO 8498.59 Hz  
 F2PHI 7.785 ppm  
 F2HI 6226.39 Hz  
 F1PLO 3.567 ppm  
 F1LO 2853.01 Hz  
 F1PHI 0.370 ppm  
 F1HI 296.11 Hz  
 F2PPMCM 0.18940 ppm/cm  
 F2HZCM 151.47998 Hz/cm  
 F1PPMCM 0.21313 ppm/cm  
 F1HZCM 170.45975 Hz/cm

S. Levin and J. S. Nowick

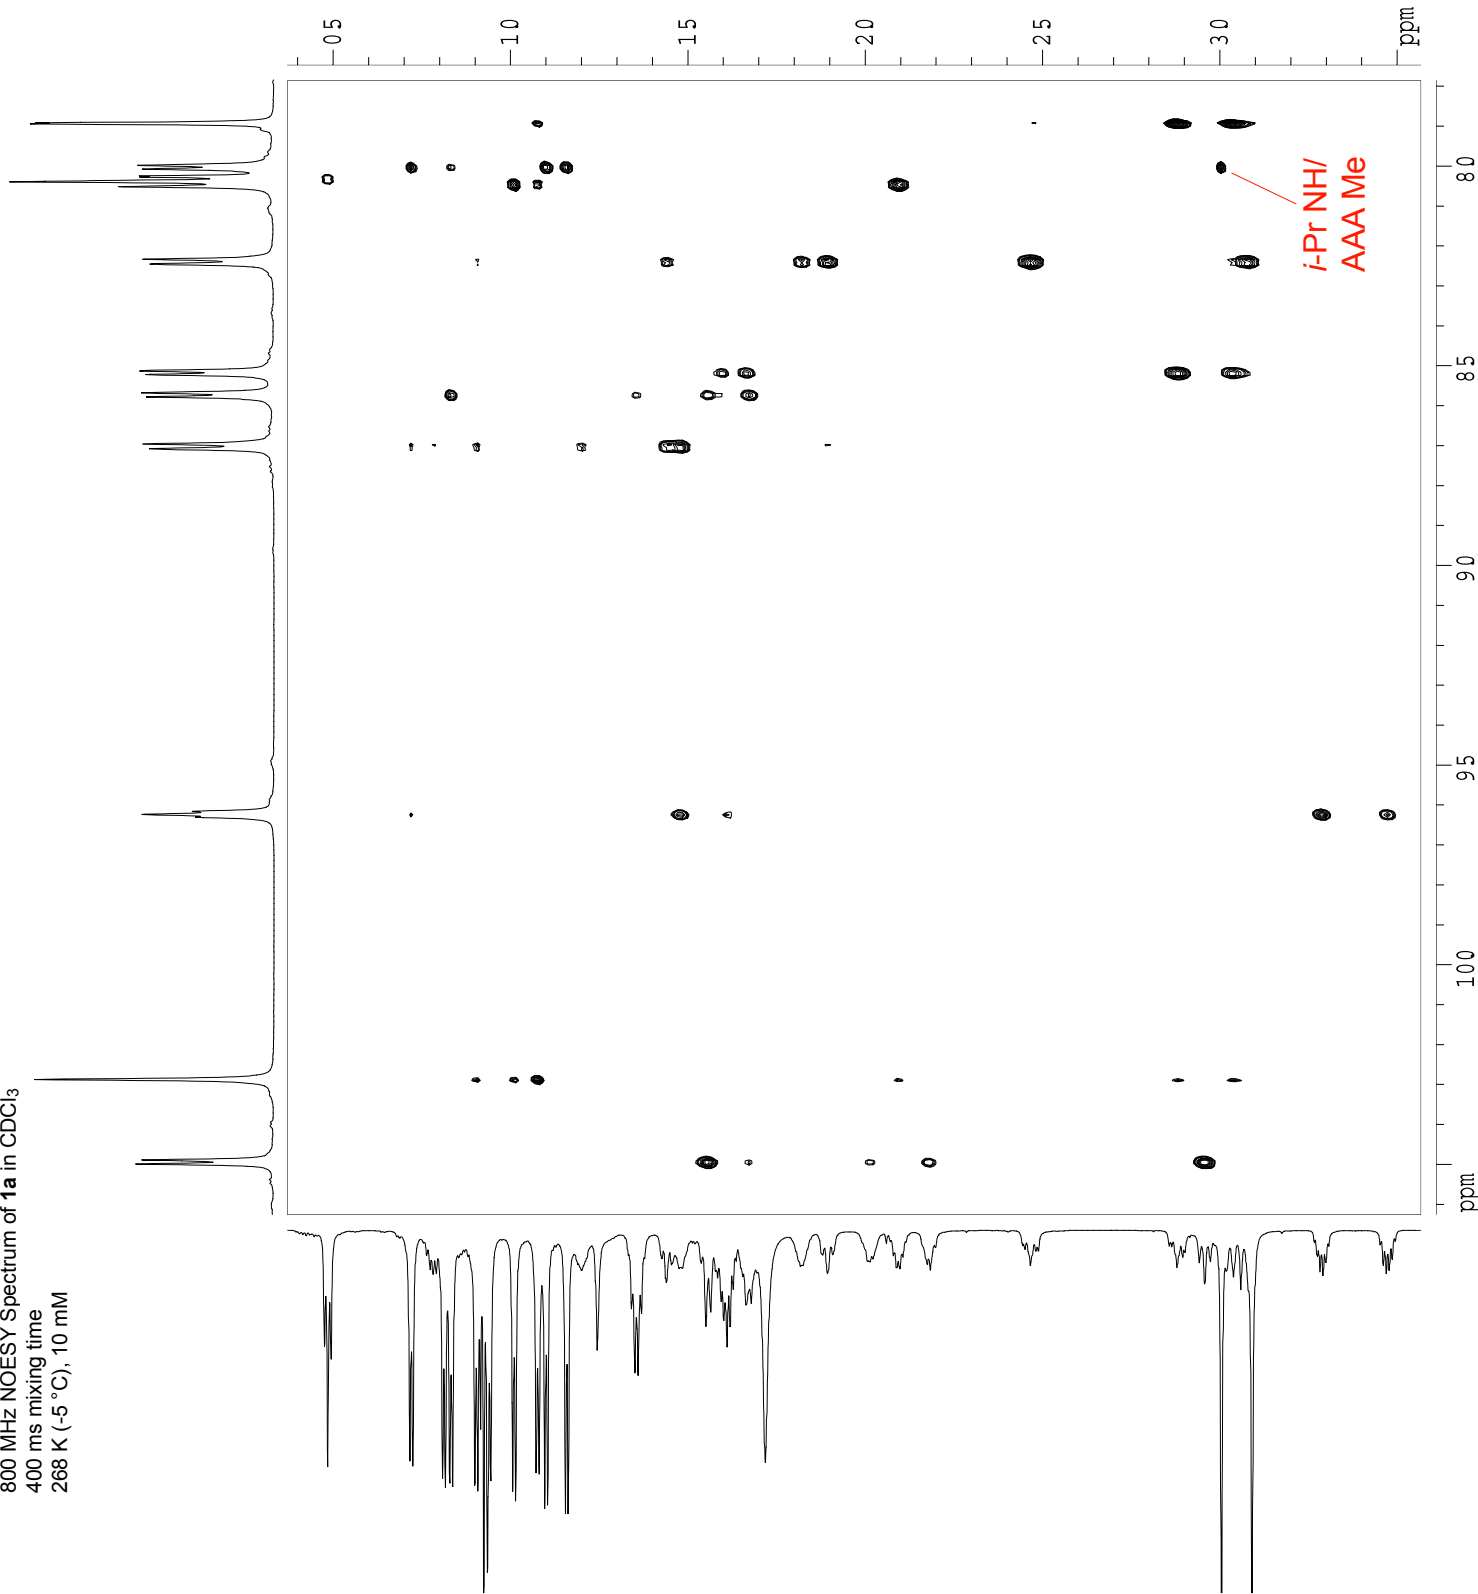

Supporting Information

S. Levin and J. S. Nowick

Current Data Parameters  
 USER slevin  
 NAME SL-7-233-800-H  
 EXPNO 4  
 PROCNO 1

F2 - Acquisition Parameters  
 Date 20070206  
 Time 0.00  
 INSTRUM varian  
 PROBHD 40:5mmrbroadban  
 PULPROG noesyh2o\_pfg\_800\_pln  
 TD 4096

SOLVENT CDCl3  
 NS 16  
 DS 64  
 SWH 11001.101 Hz  
 FIDRES 2.685816 Hz  
 AQ 0.1862132 sec  
 RG 128  
 DW 45.450 usec  
 DE 6.00 usec  
 TE 268.5 K

F1 - Acquisition parameters  
 ND0 1  
 TD 1024  
 SF01 799.8107 MHz  
 FIDRES 10.743262 Hz  
 SW 13.755 ppm  
 FMODE undefined

F2 - Processing parameters  
 SI 2048  
 SF 799.8064119 MHz  
 WDM QSINE  
 SSB 2  
 LB 0.00 Hz  
 GB 0  
 PC 1.40

F1 - Processing parameters  
 SI 1024  
 MC2 States  
 SF 799.8064119 MHz  
 WDM QSINE  
 SSB 2  
 LB 0.00 Hz  
 GB 0

2D NMR plot parameters  
 CX2 15.00 cm  
 CX1 15.00 cm  
 F2PLO 2.300 ppm  
 F2LO 1839.55 Hz  
 F2PHI 0.300 ppm  
 F2HI 239.94 Hz  
 F1PLO 2.300 ppm  
 F1LO 1839.55 Hz  
 F1PHI 0.300 ppm  
 F1HI 239.94 Hz  
 F2PPMCM 0.13333 ppm/cm  
 F2HZCM 106.64085 Hz/cm  
 F1PPMCM 0.13333 ppm/cm  
 F1HZCM 106.64085 Hz/cm

800 MHz NOESY Spectrum of **1a** in CDCl<sub>3</sub>  
 400 ms mixing time  
 268 K (-5 °C), 10 mM

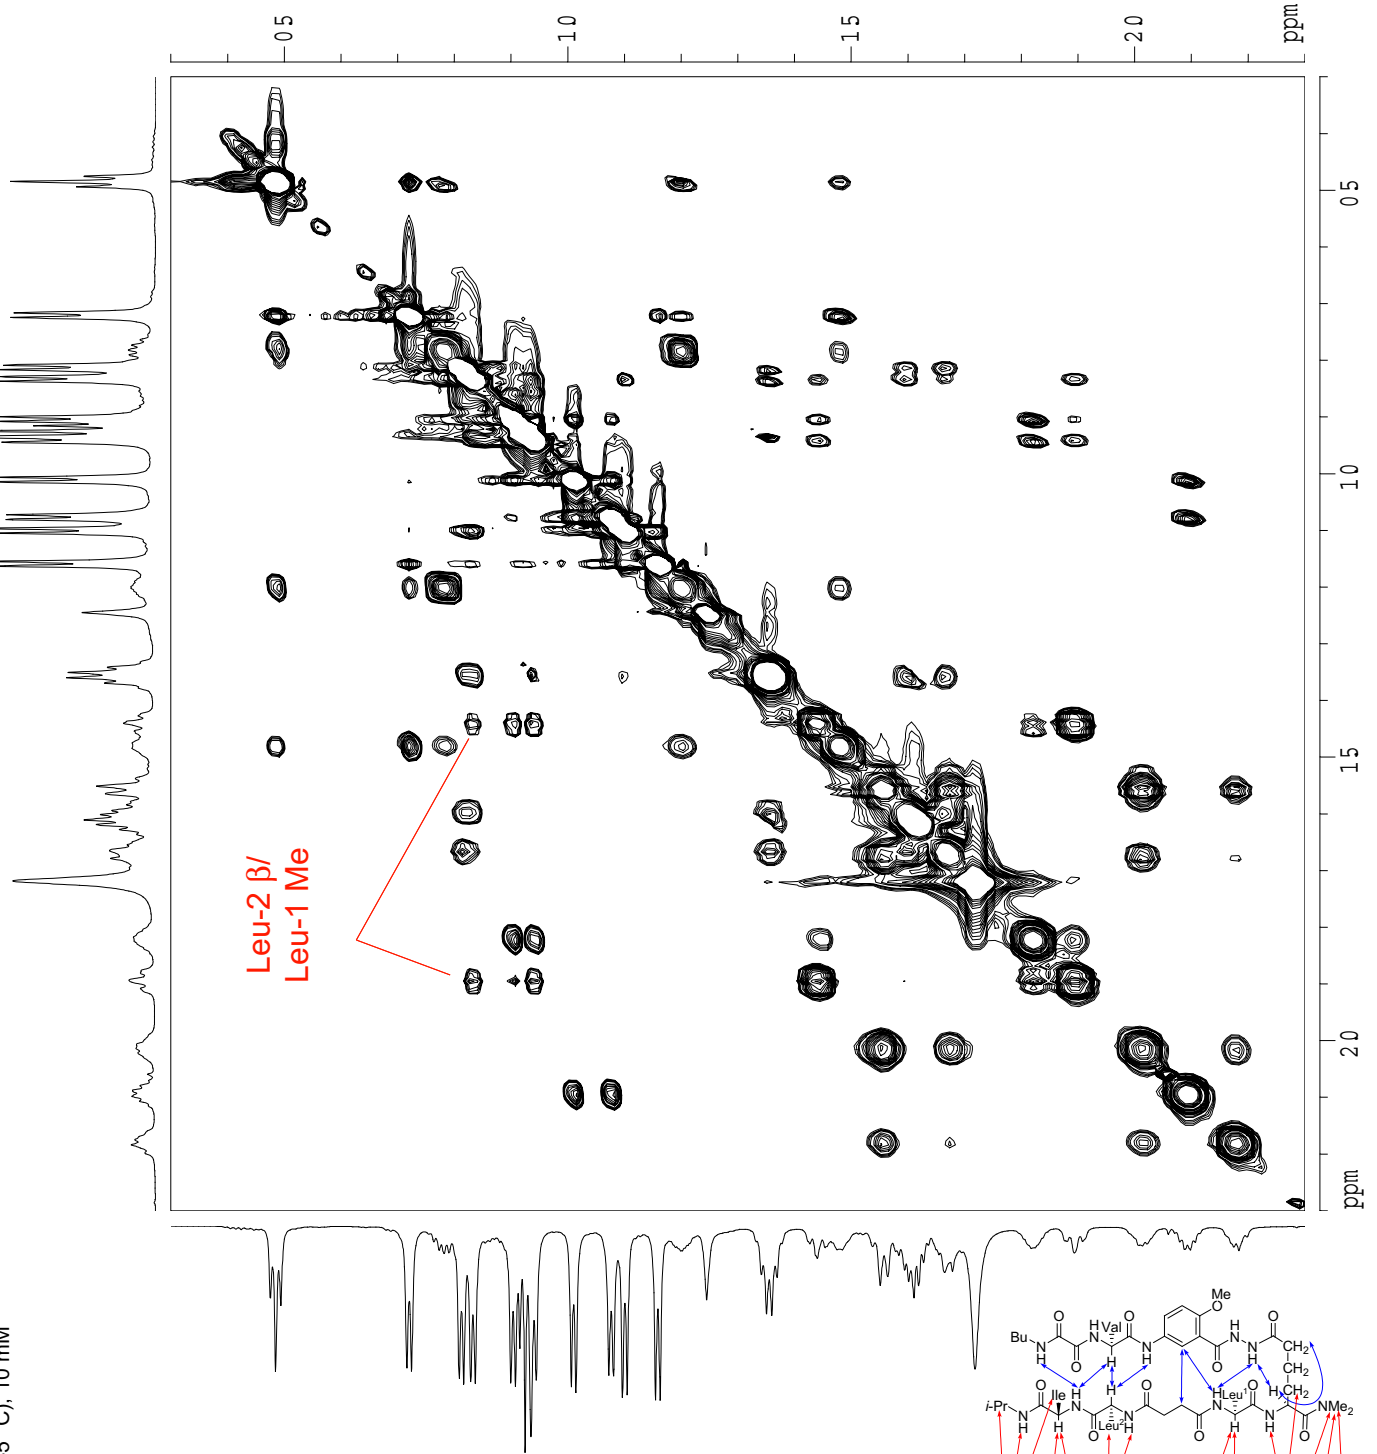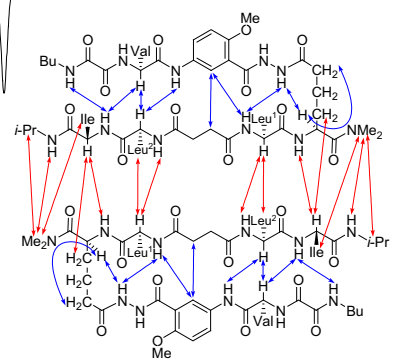

Current Data Parameters

USER slevin  
 NAME SL-7-233-800-H  
 EXPNO 4  
 PROCNO 1

F2 - Acquisition Parameters

Date\_ 20070206  
 Time\_ 0.00  
 INSTRUM varian  
 PROBHD 40:5mm broadband  
 PULPROG noesyh2o\_pfg 800\_pln  
 TD 4096  
 SOLVENT CDCl3  
 NS 16  
 DS 64  
 SWH 11001.101 Hz  
 FIDRES 2.685816 Hz  
 AQ 0.1862132 sec  
 RG 128  
 DW 45.450 usec  
 DE 6.00 usec  
 TE 268.5 K

F1 - Acquisition parameters

ND0 1  
 TD 1024  
 SFO1 799.8107 MHz  
 FIDRES 10.743262 Hz  
 SW 13.755 ppm  
 F1MODE undefined

F2 - Processing parameters

SI 2048  
 SF 799.8064119 MHz  
 WDW QSINE  
 SSB 2  
 LB 0.00 Hz  
 GB 0  
 PC 1.40

F1 - Processing parameters

SI 1024  
 MC2 States  
 SF 799.8064119 MHz  
 WDW QSINE  
 SSB 2  
 LB 0.00 Hz  
 GB 0

2D NMR plot parameters

CX2 15.00 cm  
 CX1 15.00 cm  
 F2PLO 5.528 ppm  
 F2LO 4421.52 Hz  
 F2PHI 4.716 ppm  
 F2HI 3771.56 Hz  
 F1PLO 3.164 ppm  
 F1LO 2530.71 Hz  
 F1PHI 2.063 ppm  
 F1HI 1649.76 Hz  
 F2PNCM 0.05418 ppm/cm  
 F2HZCM 43.33116 Hz/cm  
 F1PNCM 0.07343 ppm/cm  
 F1HZCM 58.72982 Hz/cm

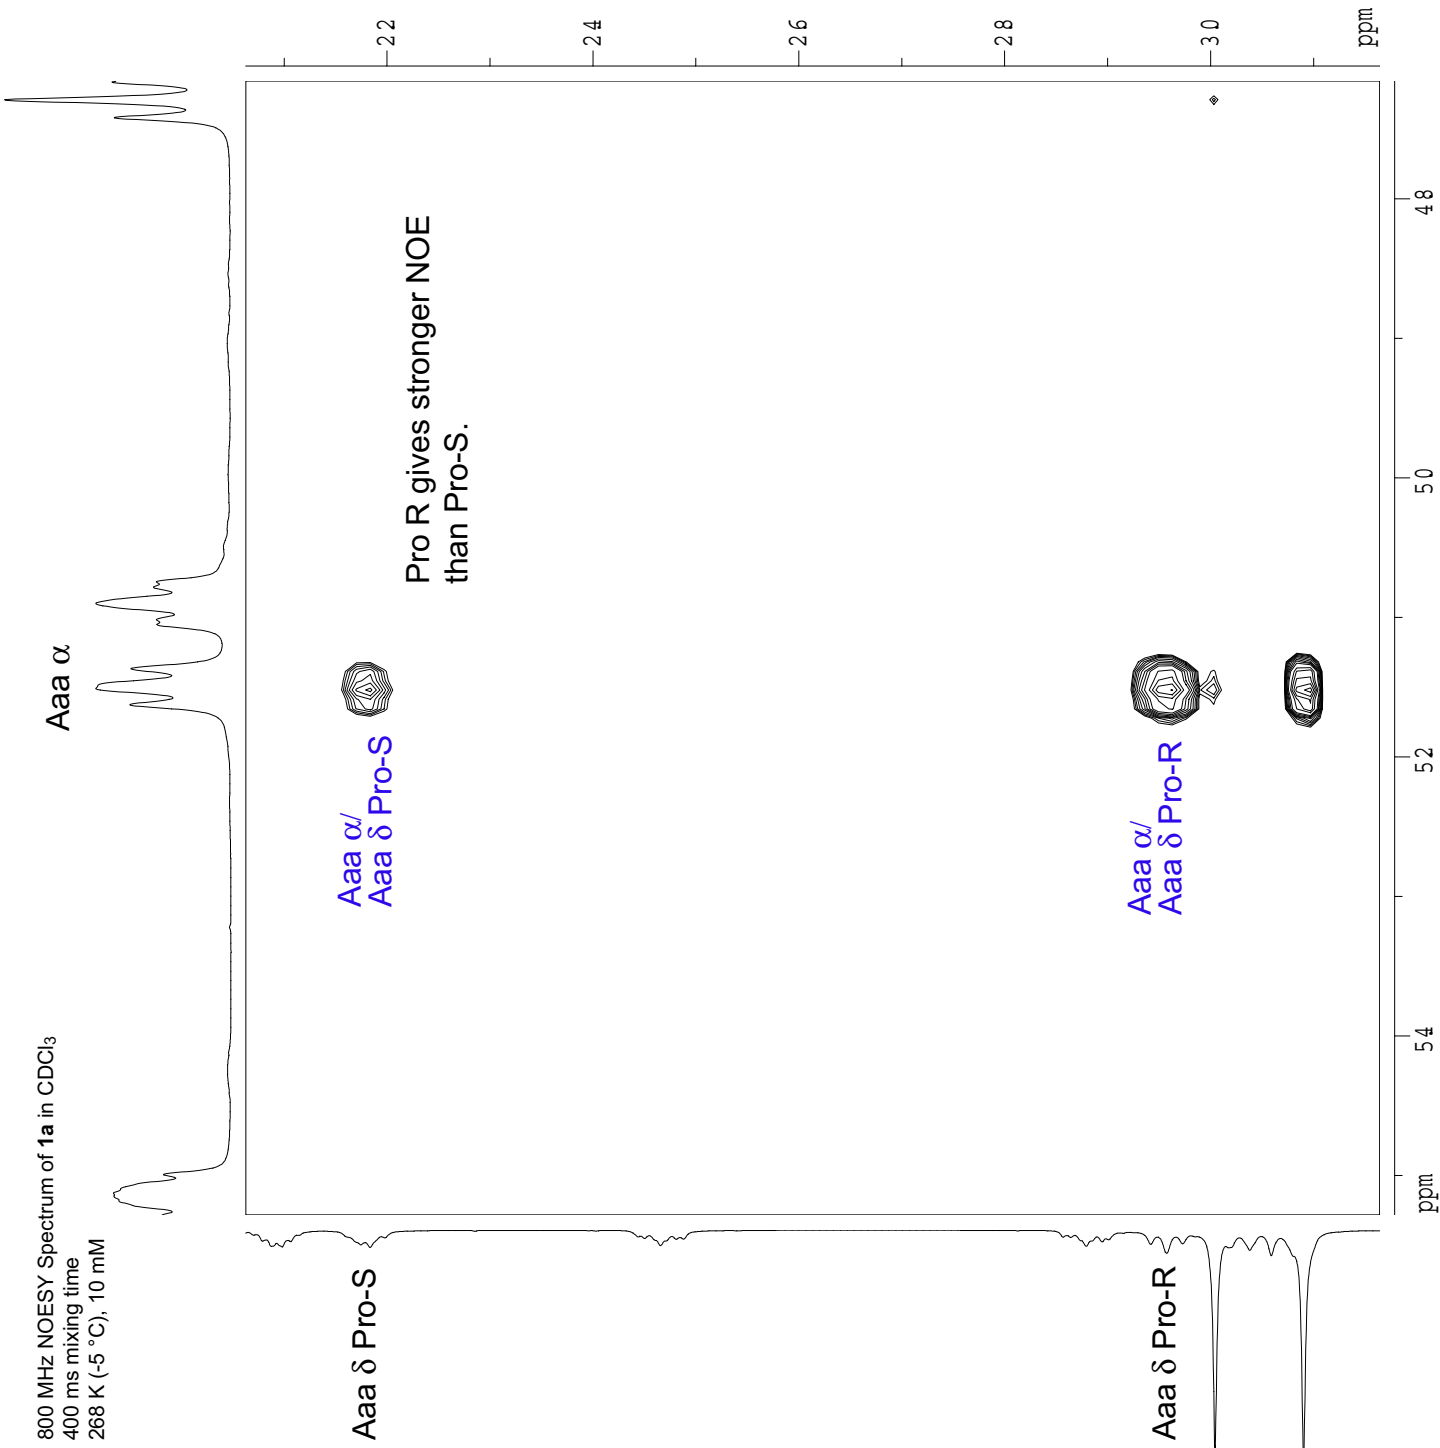

Current Data Parameters  
 USER slevin  
 NAME SL-7-233-800-H  
 EXPNO 4  
 PROCNO 1

F2 - Acquisition Parameters  
 Date\_ 20070206  
 Time\_ 0.00  
 INSTRUM varian  
 PROBHD 40:5mmbroadban  
 PULPROG noesyh2o\_pfg\_800\_pln  
 TD 4096  
 SOLVENT CDCl3  
 NS 16  
 DS 64  
 SWH 11001.101 Hz  
 FIDRES 2.683816 Hz  
 AQ 0.1862132 sec  
 RG 128  
 DW 45.450 usec  
 DE 6.00 usec  
 TE 288.5 K

F1 - Acquisition parameters  
 ND0 1  
 TD 1024  
 SF01 799.8107 MHz  
 FIDRES 10.743262 Hz  
 SW 13.755 ppm  
 FMODE undefined

F2 - Processing parameters  
 SI 2048  
 SF 799.8064119 MHz  
 WDM QSIINE  
 SSB 2  
 LB 0.00 Hz  
 GB 0  
 PC 1.40

F1 - Processing parameters  
 SI 1024  
 MC2 States  
 SF 799.8064119 MHz  
 WDM QSIINE  
 SSB 2  
 LB 0.00 Hz  
 GB 0

2D NMR plot parameters  
 CX2 15.00 cm  
 CX1 15.00 cm  
 F2PLO 5.562 ppm  
 F2LO 4448.38 Hz  
 F2PHI 4.454 ppm  
 F2HI 3562.06 Hz  
 F1PLO 2.237 ppm  
 F1LO 1789.43 Hz  
 F1PHI 0.693 ppm  
 F1HI 553.95 Hz  
 F2PPMCM 0.07388 ppm/cm  
 F2HZCM 59.08795 Hz/cm  
 F1PPMCM 0.10298 ppm/cm  
 F1HZCM 82.36501 Hz/cm

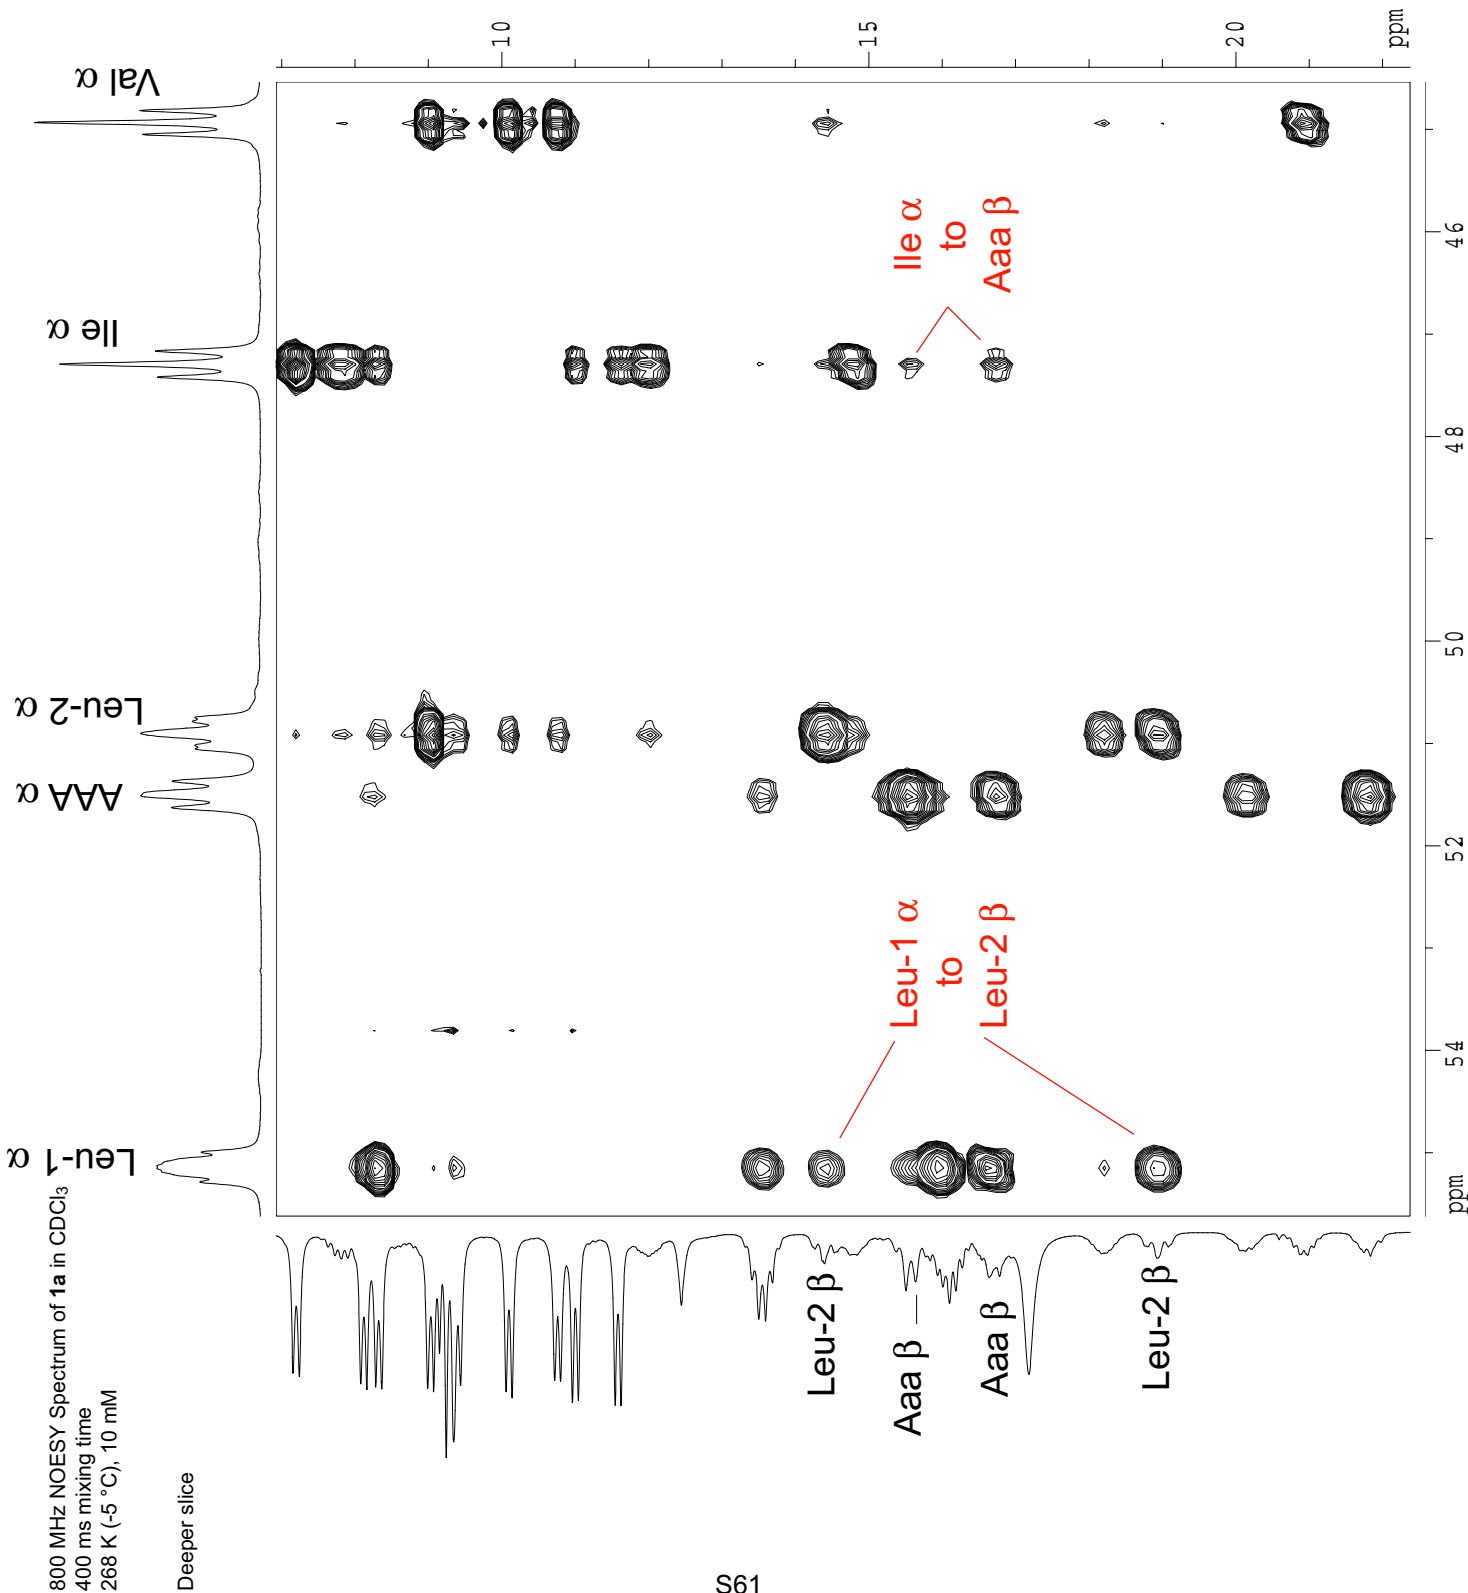

800 MHz NOESY Spectrum of **1a** in CDCl<sub>3</sub>  
 400 ms mixing time  
 268 K (-5 °C), 10 mM

Deeper Slice to show EXSY cross-peaks

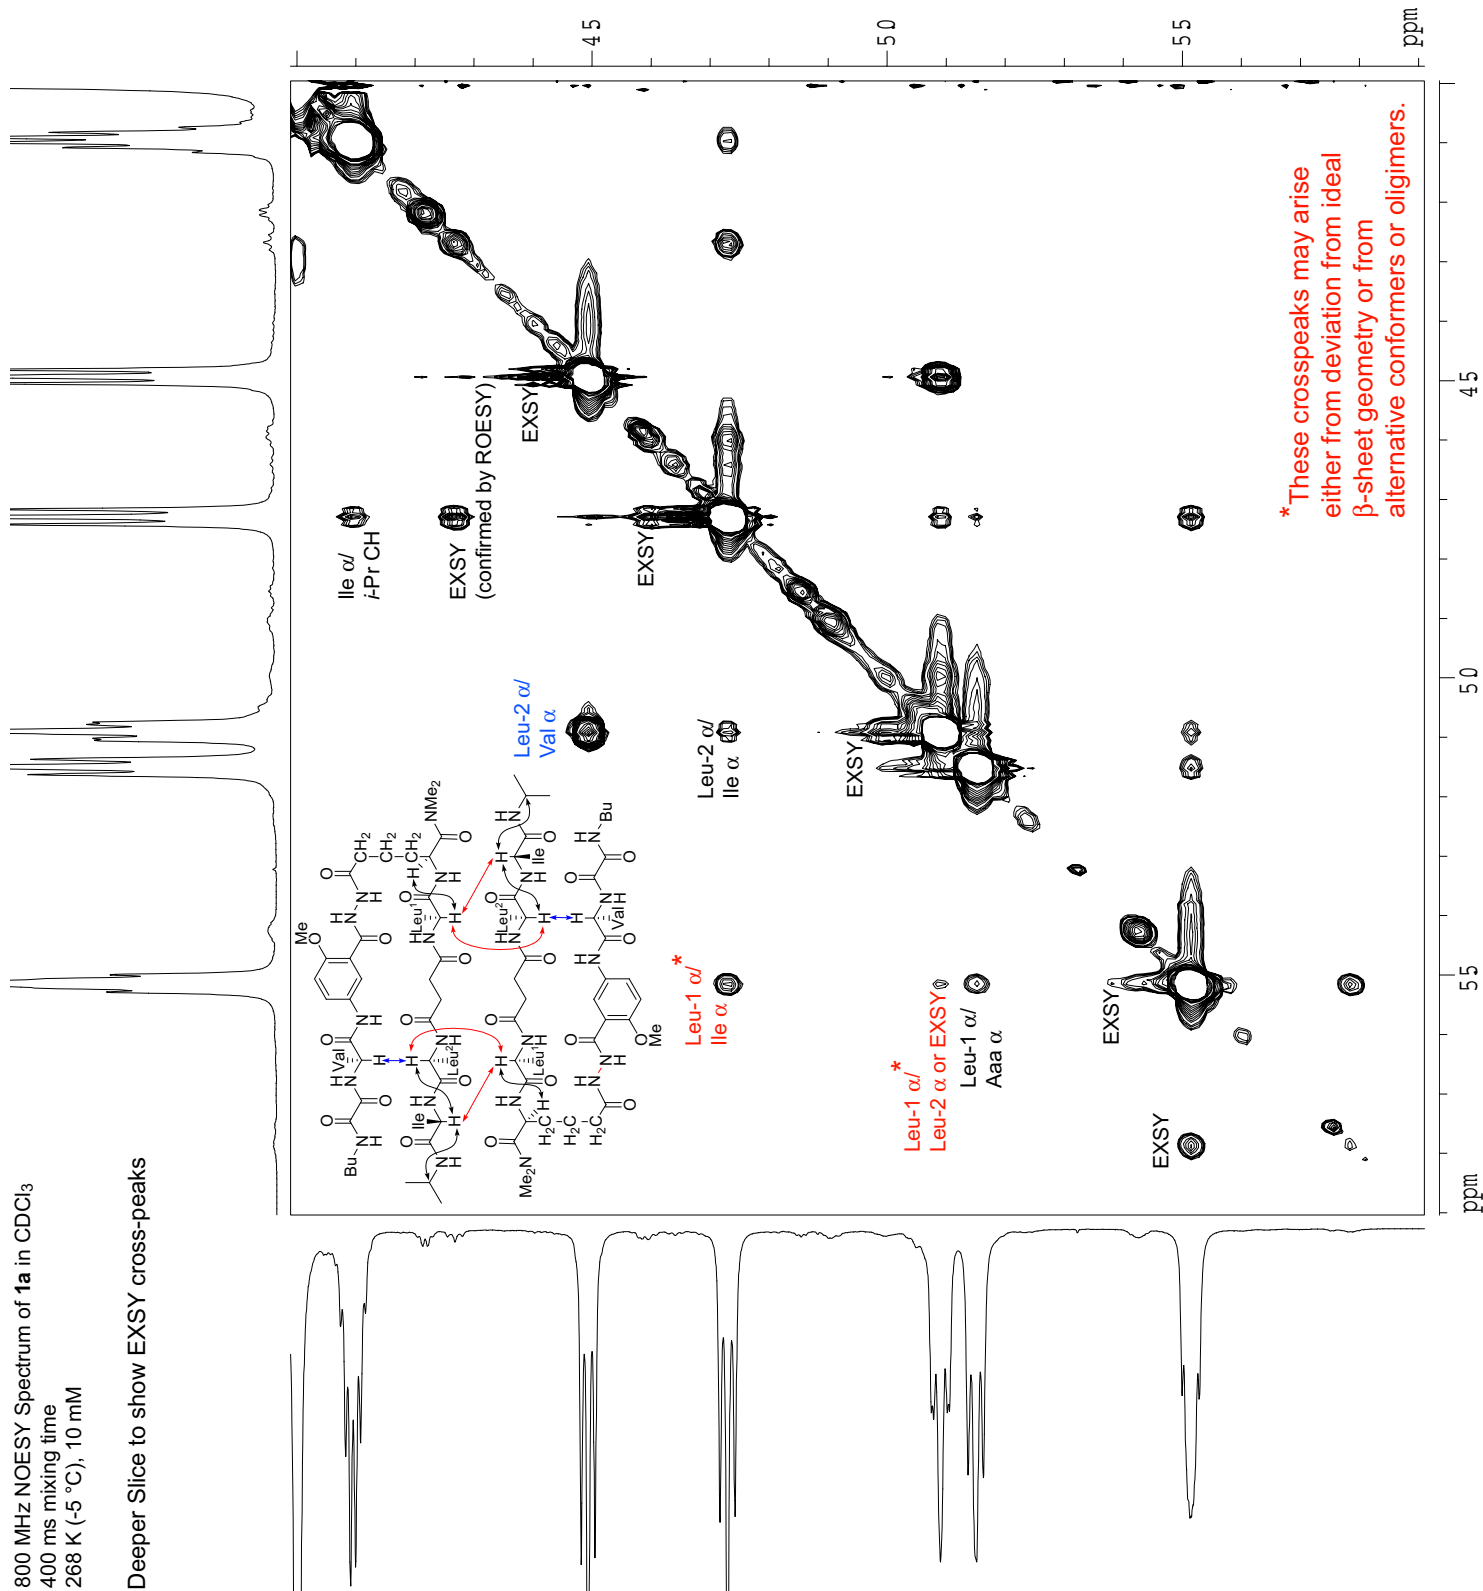

Supporting Information

Current Data Parameters  
 USER slevin  
 NAME SL-7-233-800-H  
 EXPNO 4  
 PROCNO 1

F2 - Acquisition Parameters  
 Date\_ 20070206  
 Time\_ 0.00  
 INSTRUM varian  
 PROBHD 40:5mm broadband  
 PULPROG noesyh2o\_pfg\_800\_pln

TD 4096  
 SOLVENT CDCl3  
 NS 16  
 DS 64  
 SWH 11001.101 Hz  
 FIDRES 2.685816 Hz  
 AQ 0.1862132 sec  
 RG 128  
 DW 45.450 usec  
 DE 6.00 usec  
 TE 268.5 K

F1 - Acquisition parameters  
 NDO 1  
 TD 1024  
 SFO1 799.8107 MHz  
 FIDRES 10.743262 Hz  
 SW 13.755 ppm  
 FreqMODE undefined

F2 - Processing parameters  
 SI 2048  
 SF 799.8064119 MHz  
 WDW QSI  
 SSB 2  
 LB 0.00 Hz  
 GB 0  
 PC 1.40

F1 - Processing parameters  
 SI 1024  
 MC2 States  
 SF 799.8064119 MHz  
 WDW QSI  
 SSB 2  
 LB 0.00 Hz  
 GB 0

2D NMR plot parameters  
 CX2 15.00 cm  
 CX1 15.00 cm  
 F2PLO 5.904 ppm  
 F2LO 4721.66 Hz  
 F2PHI 3.996 ppm  
 F2HI 3196.12 Hz  
 F1PLO 5.910 ppm  
 F1LO 4727.03 Hz  
 F1PHI 3.989 ppm  
 F1HI 3190.74 Hz  
 F2PPMCM 0.12716 ppm/cm  
 F2HZCM 101.70288 Hz/cm  
 F1PPMCM 0.12805 ppm/cm  
 F1HZCM 102.41909 Hz/cm

Supporting Information

S. Levin and J. S. Nowick

Current Data Parameter  
 USER slevin  
 NAME SL-7-233-600N-H  
 EXNO 9  
 PROCNO 1

F2 - Acquisition Parameter

Date 20070201  
 Time 0.54  
 INSTRUM av600  
 PROBHD 5 mm TBI 1H/13  
 PULPROG roesyph.2.prd  
 TD 1912  
 SOLVENT CDCl3  
 NS 32  
 DS 16  
 SWH 7211.539 Hz  
 FIDRES 3.771725 Hz  
 AQ 0.1326153 sec  
 RG 1150  
 DW 69.333 usec  
 DE 6.00 usec  
 TE 268.0 K  
 d0 0.00006033 sec  
 D1 2.00000000 sec  
 d8 0.25000000 sec  
 d12 0.00002000 sec  
 INO 0.00013885 sec  
 L4 500  
 STICNT 128

\*\*\*\*\* CHANNEL f1 \*\*\*\*\*

MUCL 1H  
 P1 8.00 usec  
 P25 250.00 usec  
 PL1 -1.00 dB  
 PL27 22.70 dB  
 SF01 600.1335408 MHz

F1 - Acquisition parameter

ND0 1  
 TD 256  
 SF01 600.1335 MHz  
 FIDRES 28.132877 Hz  
 SW 12.001 ppm  
 FwMODE States-TPII

F2 - Processing parameter

SI 1024  
 SF 600.1300226 MHz  
 WDM QSIINE  
 SSB 2  
 LB 0.00 Hz  
 GB 0  
 PC 1.40

F1 - Processing parameter

SI 1024  
 MC2 States-TPII  
 SF 600.1300226 MHz  
 WDM QSIINE  
 SSB 2  
 LB 0.00 Hz  
 GB 0

2D NMR plot parameter

CX2 15.00 cm  
 CX1 15.00 cm  
 F2PLO 5.909 ppm  
 F2LO 3546.36 Hz  
 F2PHI 3.997 ppm  
 F2HI 2398.43 Hz  
 F1PLO 5.909 ppm  
 F1LO 3546.33 Hz  
 F1PHI 3.999 ppm  
 F1HI 2399.51 Hz  
 F2PMCM 0.12752 ppm/cm  
 F2HCM 76.52869 Hz/cm  
 F1PMCM 0.12735 ppm/cm  
 F1HCM 76.42765 Hz/cm

600 MHz ROESY Spectrum of **1a** in CDCl<sub>3</sub>  
 250 ms spin-locking time  
 268 K (-5 °C), 10 mM

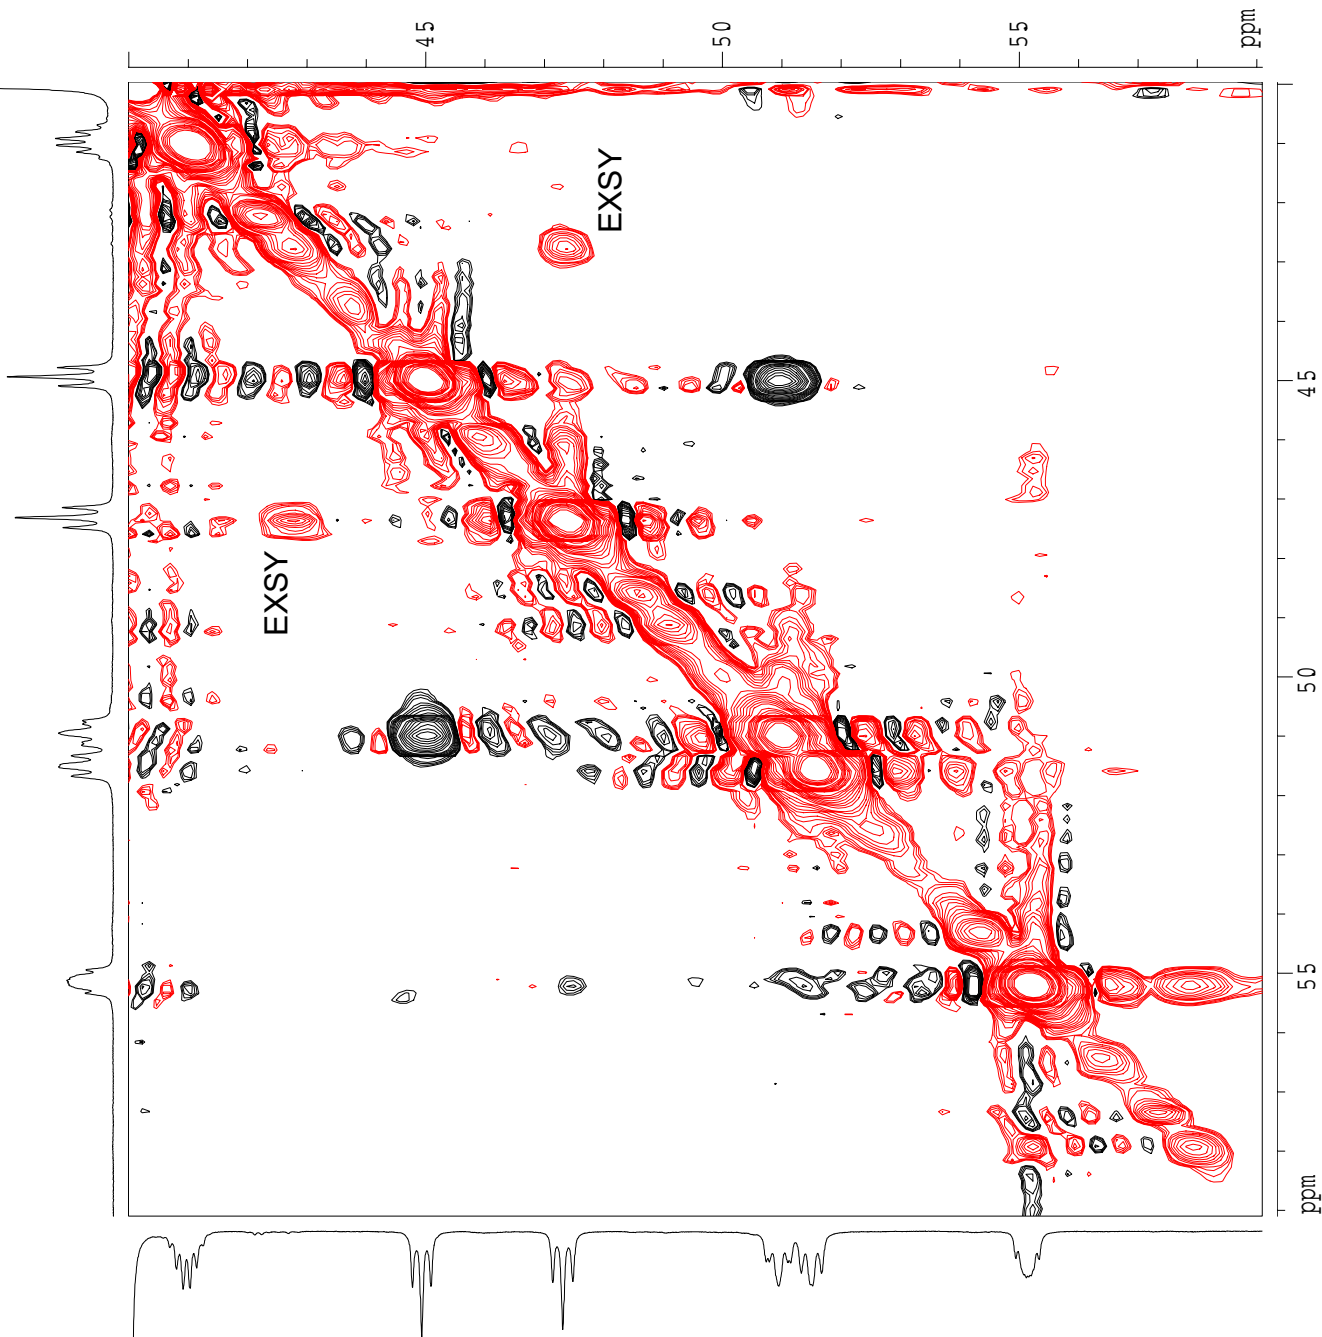

**Spectroscopic DATA for the compound **1b****  
(6 mM, CDCl<sub>3</sub> 268K)

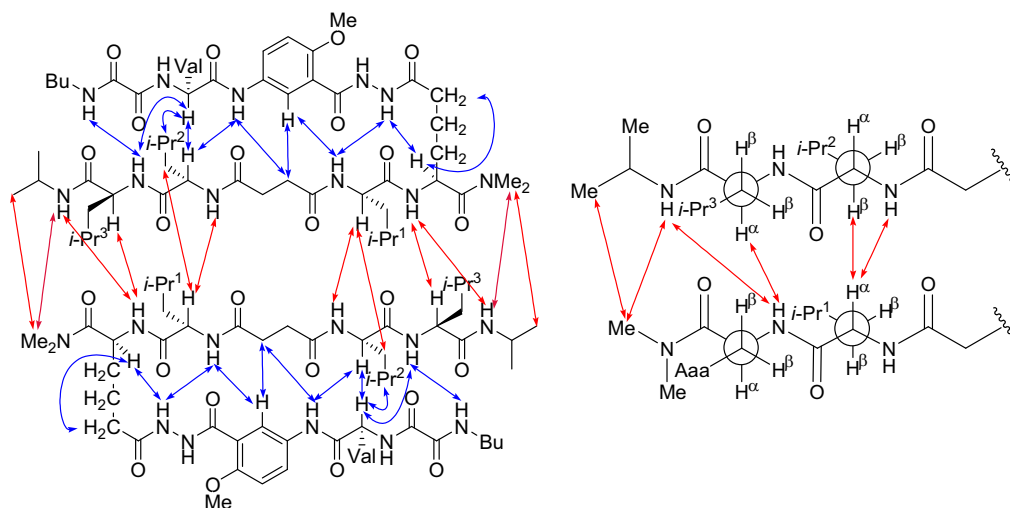

Key NOEs assigned as *intermolecular* are represented with red arrows

Key NOEs assigned as *intramolecular* are represented with blue arrows

Key data for amino acids.

| Amino acid                        | H <sub>α</sub> Shift ppm | NH Shift ppm | <sup>3</sup> J <sub>NHα</sub> Hz |
|-----------------------------------|--------------------------|--------------|----------------------------------|
| Aaa                               | 5.16                     | 8.67         | 9.1                              |
| R <sub>1</sub> = Leu <sup>1</sup> | 5.53                     | 8.47         | 8.0                              |
| R <sub>2</sub> = Leu <sup>2</sup> | 5.02                     | 8.25         | 9.7                              |
| R <sub>3</sub> = Leu <sup>3</sup> | 5.01                     | 8.68         | 10.4                             |
| R <sub>4</sub> = Val              | 4.46                     | 8.04         | 8.7                              |

Amino adipic acid (Aaa) δ proton resonances.

*pro-R*: 2.92 ppm, t, (*overlap*)

*pro-S*: 2.18 ppm, td, (*J*<sub>1</sub> = 11.5 Hz; *J*<sub>2</sub> = 7.0 Hz)

anisotropy = 0.74ppm

Key data for other NH protons.

| Proton          | NH Shift ppm | <i>J</i> Hz |
|-----------------|--------------|-------------|
| Ar-NH           | 10.28        | -           |
| Hydrazide Ar    | 10.59        | 7.4         |
| Hydrazide Aaa   | 10.44        | 7.4         |
| Bu-NH           | 9.54         | 5.9         |
| <i>i</i> -Pr-NH | 8.03         | 7.7         |

ESI MS *m/z* for C<sub>52</sub>H<sub>88</sub>N<sub>11</sub>O<sub>12</sub> [M+H]<sup>+</sup> calcd 1058.66, found 1058.51.



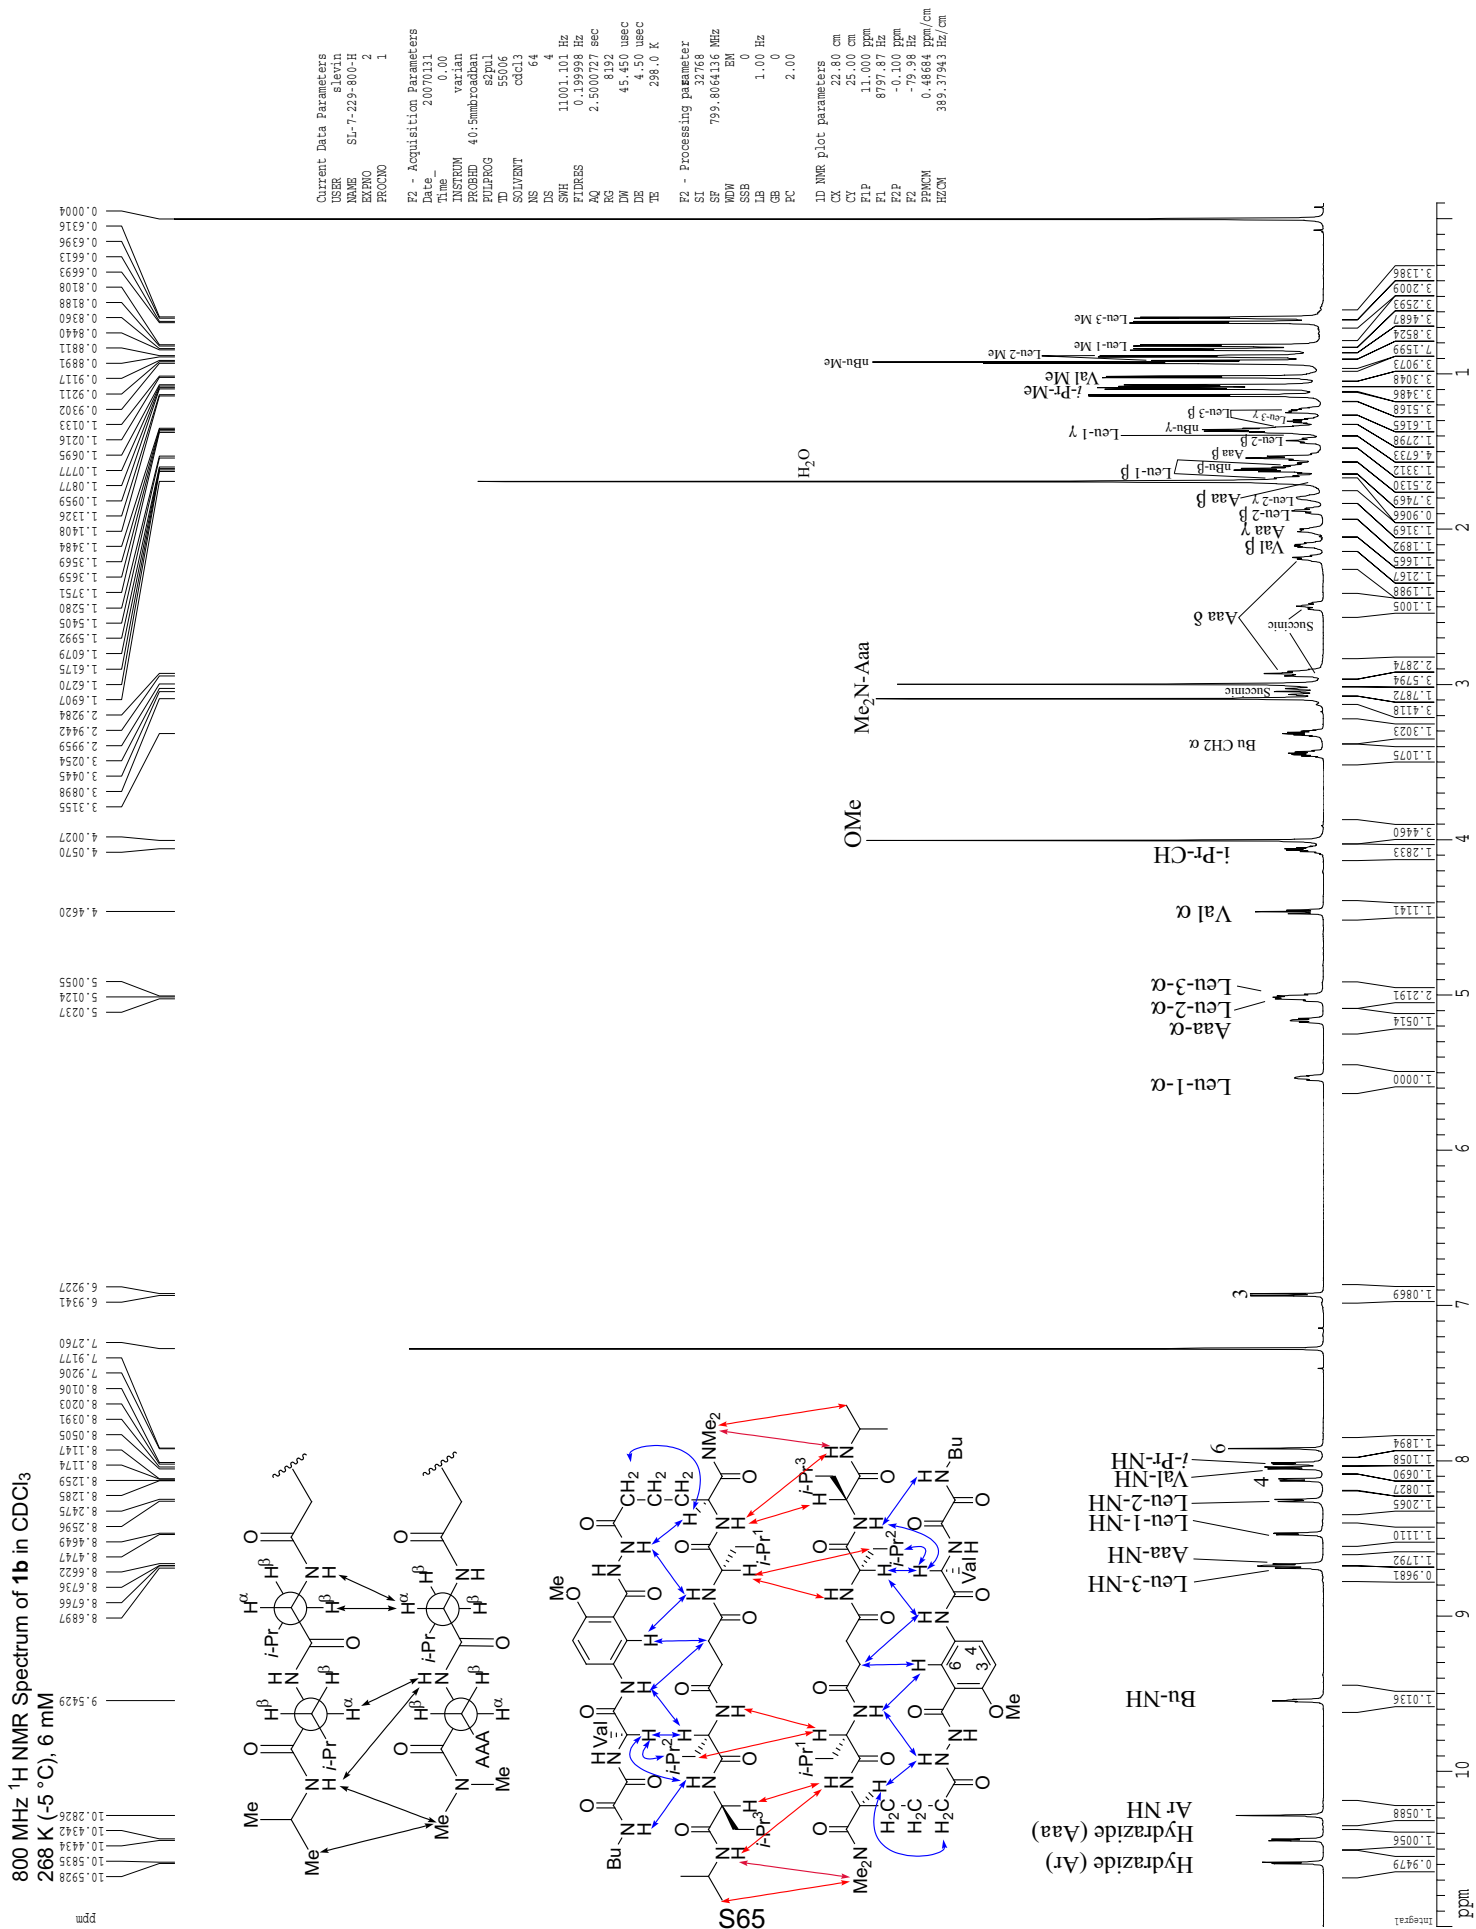

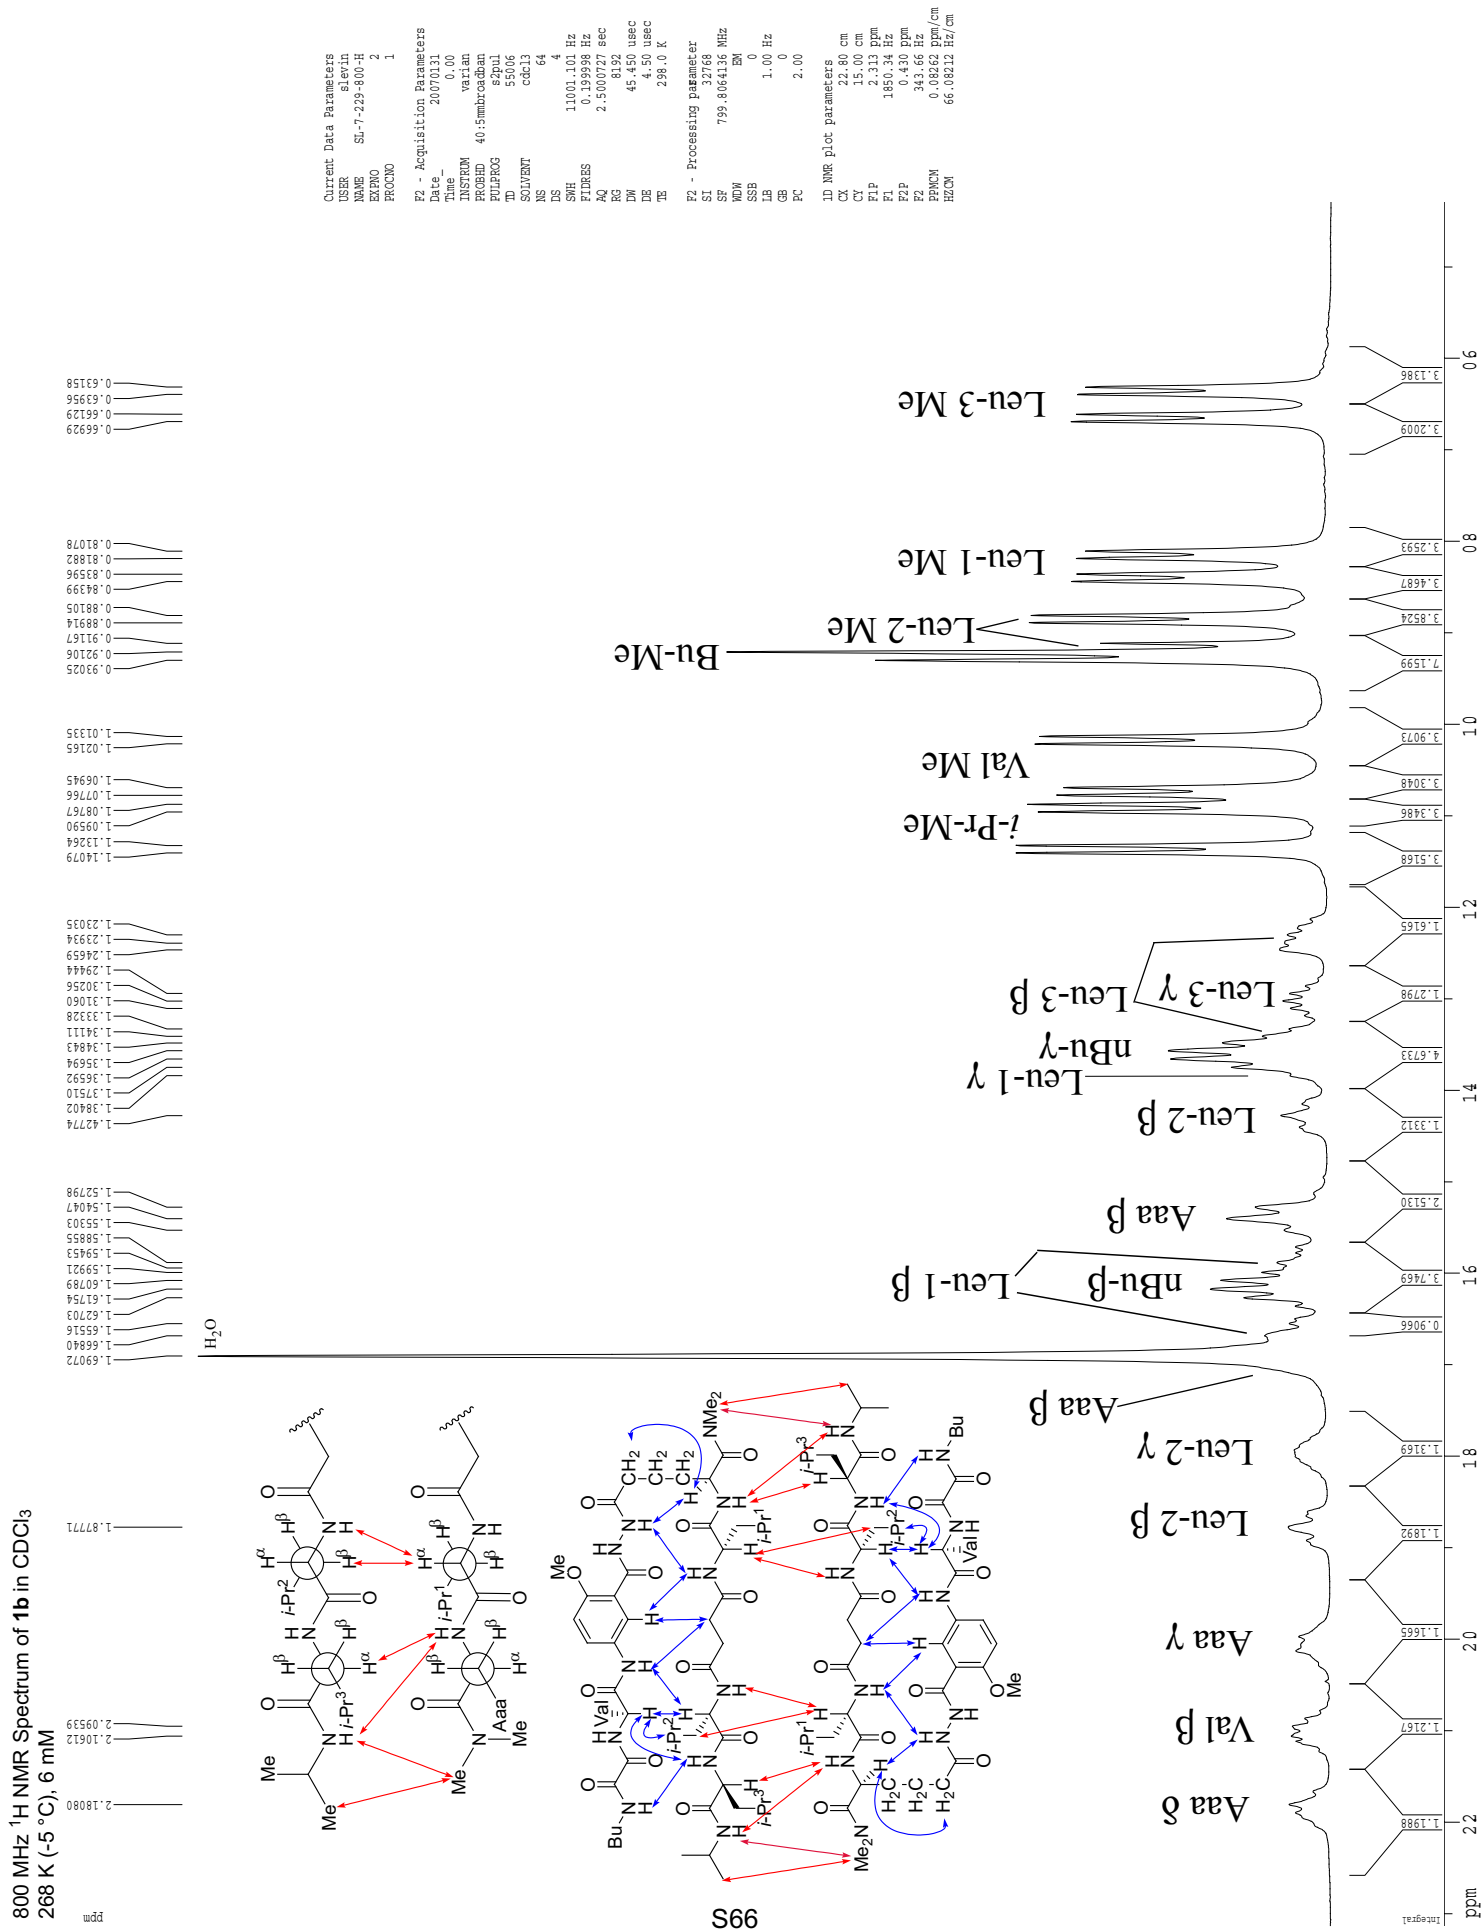

Supporting Information

Current Data Parameters  
 USER slevin  
 NAME SL-7-229-800-H  
 EXPNO 3  
 PROCNO 1

F2 - Acquisition Parameters

Date\_ 20070130  
 Time 0.00  
 INSTRUM varian  
 PROBHD 40:5mm broadband  
 PULPROG gpcsy  
 TD 4096  
 SOLVENT cdcl3  
 NS 8  
 DS 64  
 SWH 11001.101 Hz  
 FIDRES 2.685816 Hz  
 AQ 0.1843700 sec  
 RG 4096  
 DW 45.450 usec  
 DE 231.43 usec  
 TE 288.5 K

F1 - Acquisition Parameters

ND0 1  
 TD 512  
 SFO1 799.8107 MHz  
 FIDRES 21.486525 Hz  
 SW 13.755 ppm  
 FRMODE undefined

F2 - Processing parameters

SI 2048  
 SF 799.8064136 MHz  
 WDW SINE  
 SSB 0  
 LB 0.00 Hz  
 GB 0  
 PC 1.40

F1 - Processing parameters

SI 1024  
 MC2 QF  
 SF 799.8064136 MHz  
 WDW SINE  
 SSB 0  
 LB 0.00 Hz  
 GB 0

2D NMR plot parameters

CX2 15.00 cm  
 CX1 15.00 cm  
 F2PLO 5.500 ppm  
 F2LO 4398.94 Hz  
 F2PHI -0.100 ppm  
 F2HI -79.98 Hz  
 F1PLO 5.500 ppm  
 F1LO 4398.94 Hz  
 F1PHI -0.100 ppm  
 F1HI -79.98 Hz  
 F2PPMCM 0.37333 ppm/cm  
 F2HZCM 298.59439 Hz/cm  
 F1PPMCM 0.37333 ppm/cm  
 F1HZCM 298.59439 Hz/cm

800 MHz COSY Spectrum of **1b** in CDCl<sub>3</sub>  
 288 K (-5 °C), 6 mM

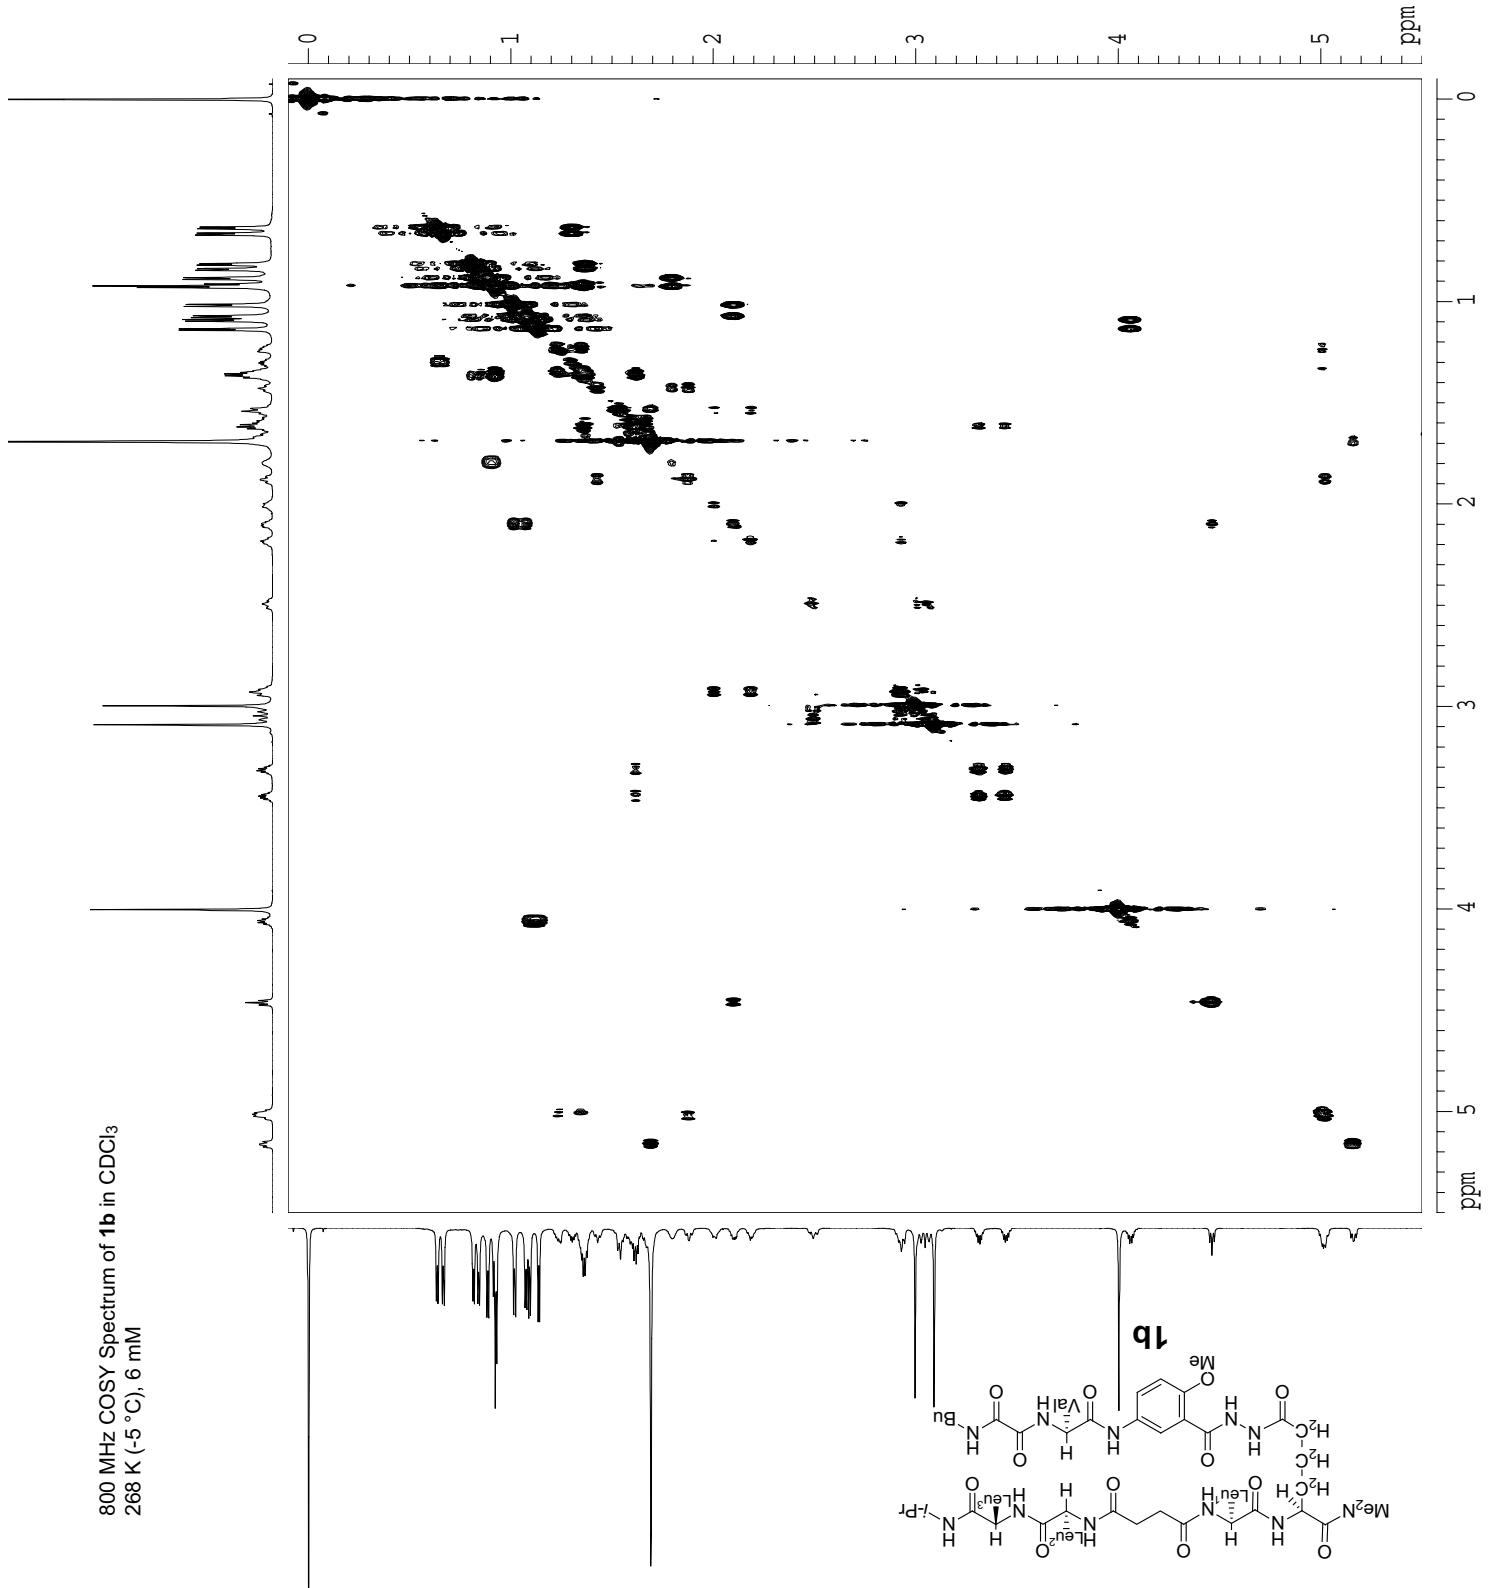

Supporting Information

Current Data Parameters

USER slevin  
 NAME SL-7-229-800-H  
 EXPNO 3  
 PROCNO 1

F2 - Acquisition Parameters

Date\_ 20070130  
 Time\_ 0.00  
 INSTRUM varian  
 PROBHD 40:5mmrbroadban  
 PULPROG gcosy  
 TD 4096  
 SOLVENT cdcl3  
 NS 8  
 DS 64  
 SWH 11001.101 Hz  
 FIDRES 2.685816 Hz  
 AQ 0.1843700 sec  
 RG 4096  
 DW 45.450 usec  
 DE 231.43 usec  
 TE 268.5 K

F1 - Acquisition parameters

ND0 1  
 TD 512  
 SFO1 799.8107 MHz  
 FIDRES 21.486525 Hz  
 SW 13.755 ppm  
 F1MODE undefined

F2 - Processing parameters

SI 2048  
 SF 799.8064136 MHz  
 WDW SINE  
 SSB 0  
 LB 0.00 Hz  
 GB 0  
 PC 1.40

F1 - Processing parameters

SI 1024  
 MC2 QF  
 SF 799.8064136 MHz  
 WDW SINE  
 SSB 0  
 LB 0.00 Hz  
 GB 0

2D NMR plot parameters

CX2 15.00 cm  
 CX1 15.00 cm  
 F2PLO 5.645 ppm  
 F2LO 4514.86 Hz  
 F2PHI 3.926 ppm  
 F2HI 3139.72 Hz  
 F1PLO 2.186 ppm  
 F1LO 1748.47 Hz  
 F1PHI 0.923 ppm  
 F1HI 738.60 Hz  
 F2PPMCM 0.11462 ppm/cm  
 F2HZCM 91.67583 Hz/cm  
 F1PPMCM 0.08418 ppm/cm  
 F1HZCM 67.32444 Hz/cm

800 MHz COSY Spectrum of **1b** in CDCl<sub>3</sub>  
 268 K (-5 °C), 6 mM

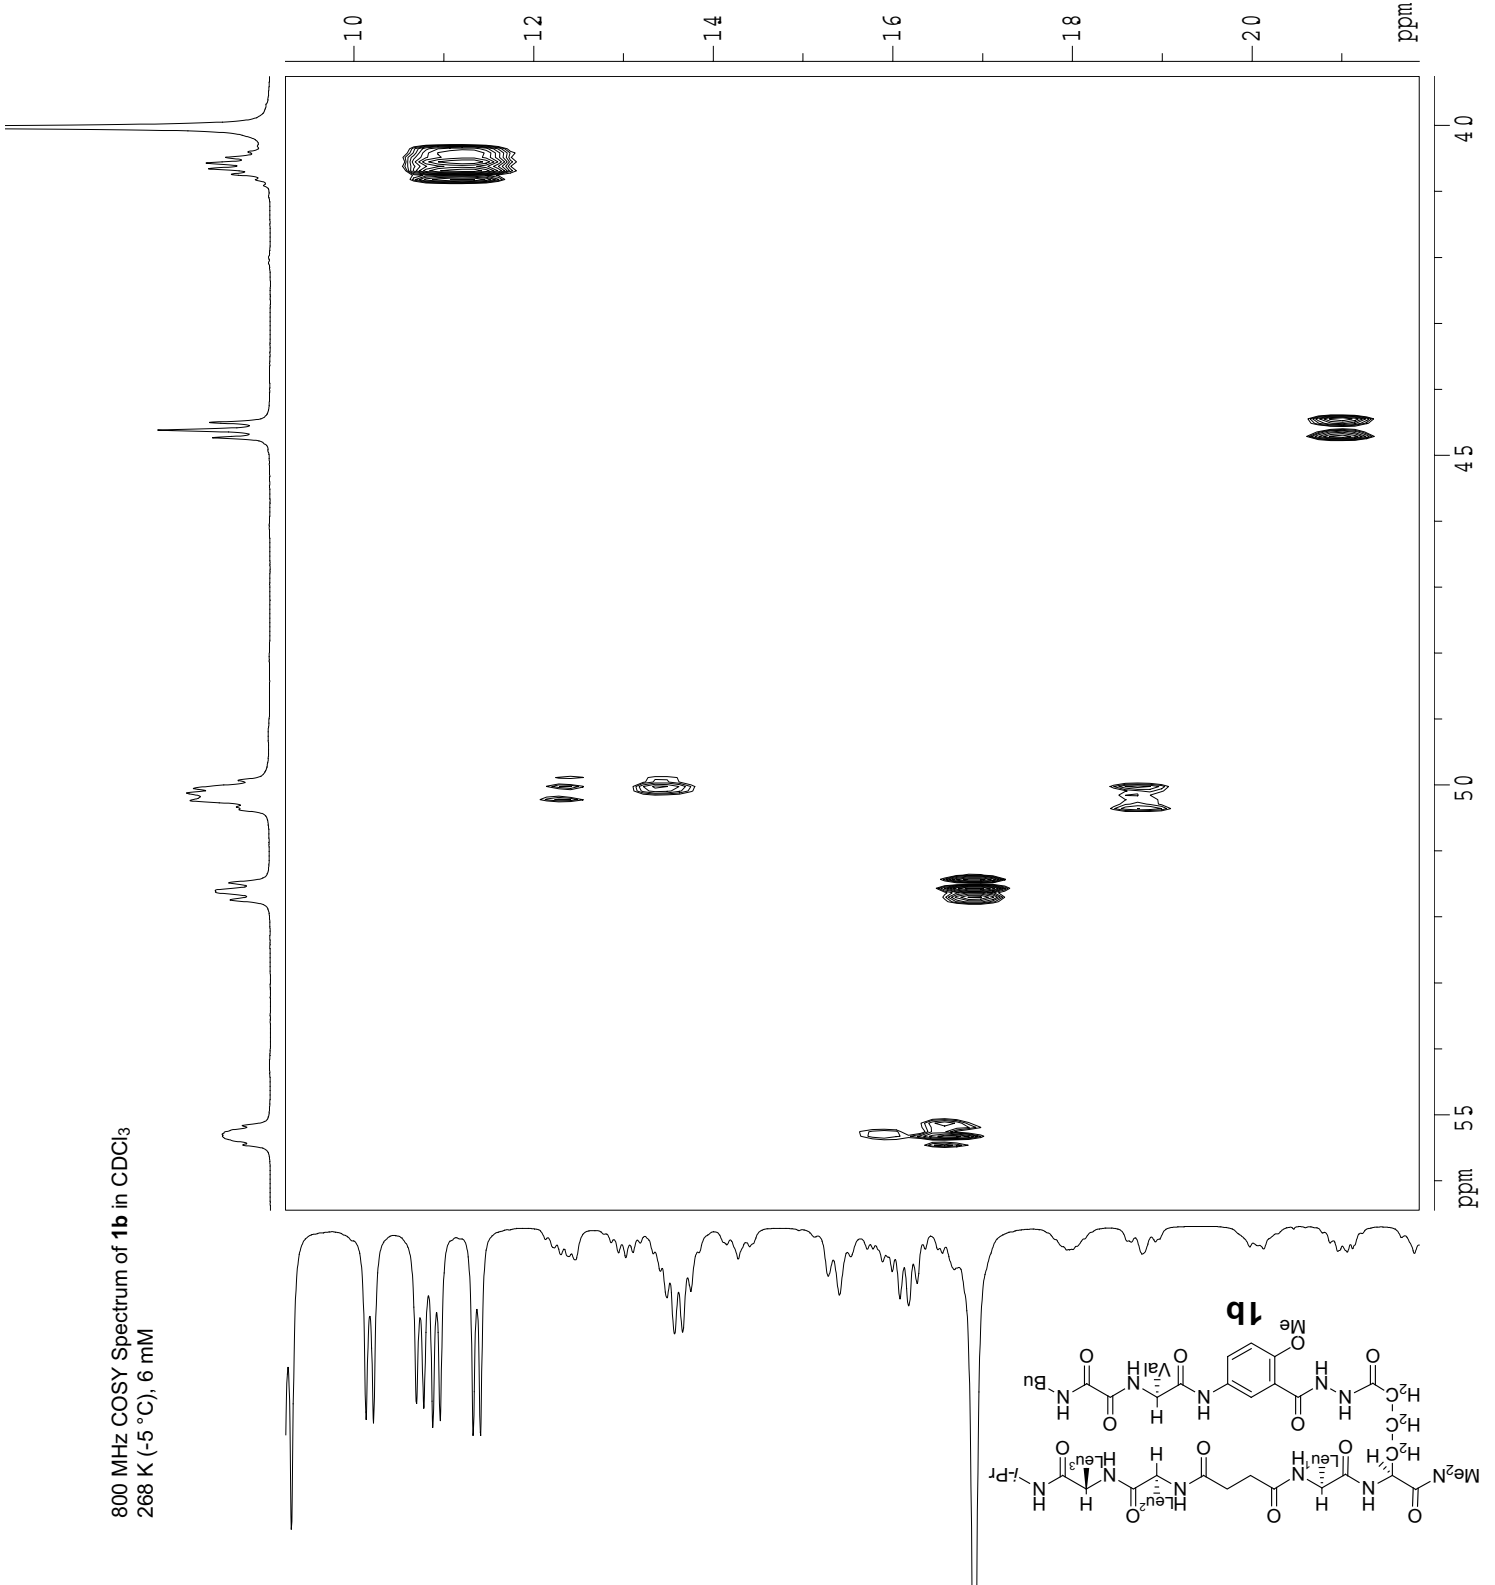

800 MHz COSY Spectrum of **1b** in CDCl<sub>3</sub>  
 268 K (-5 °C), 6 mM

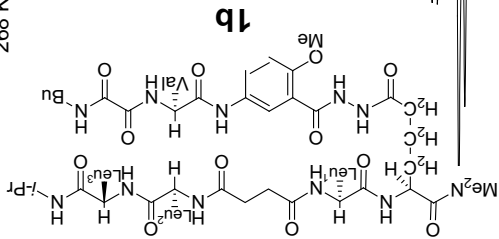

S69

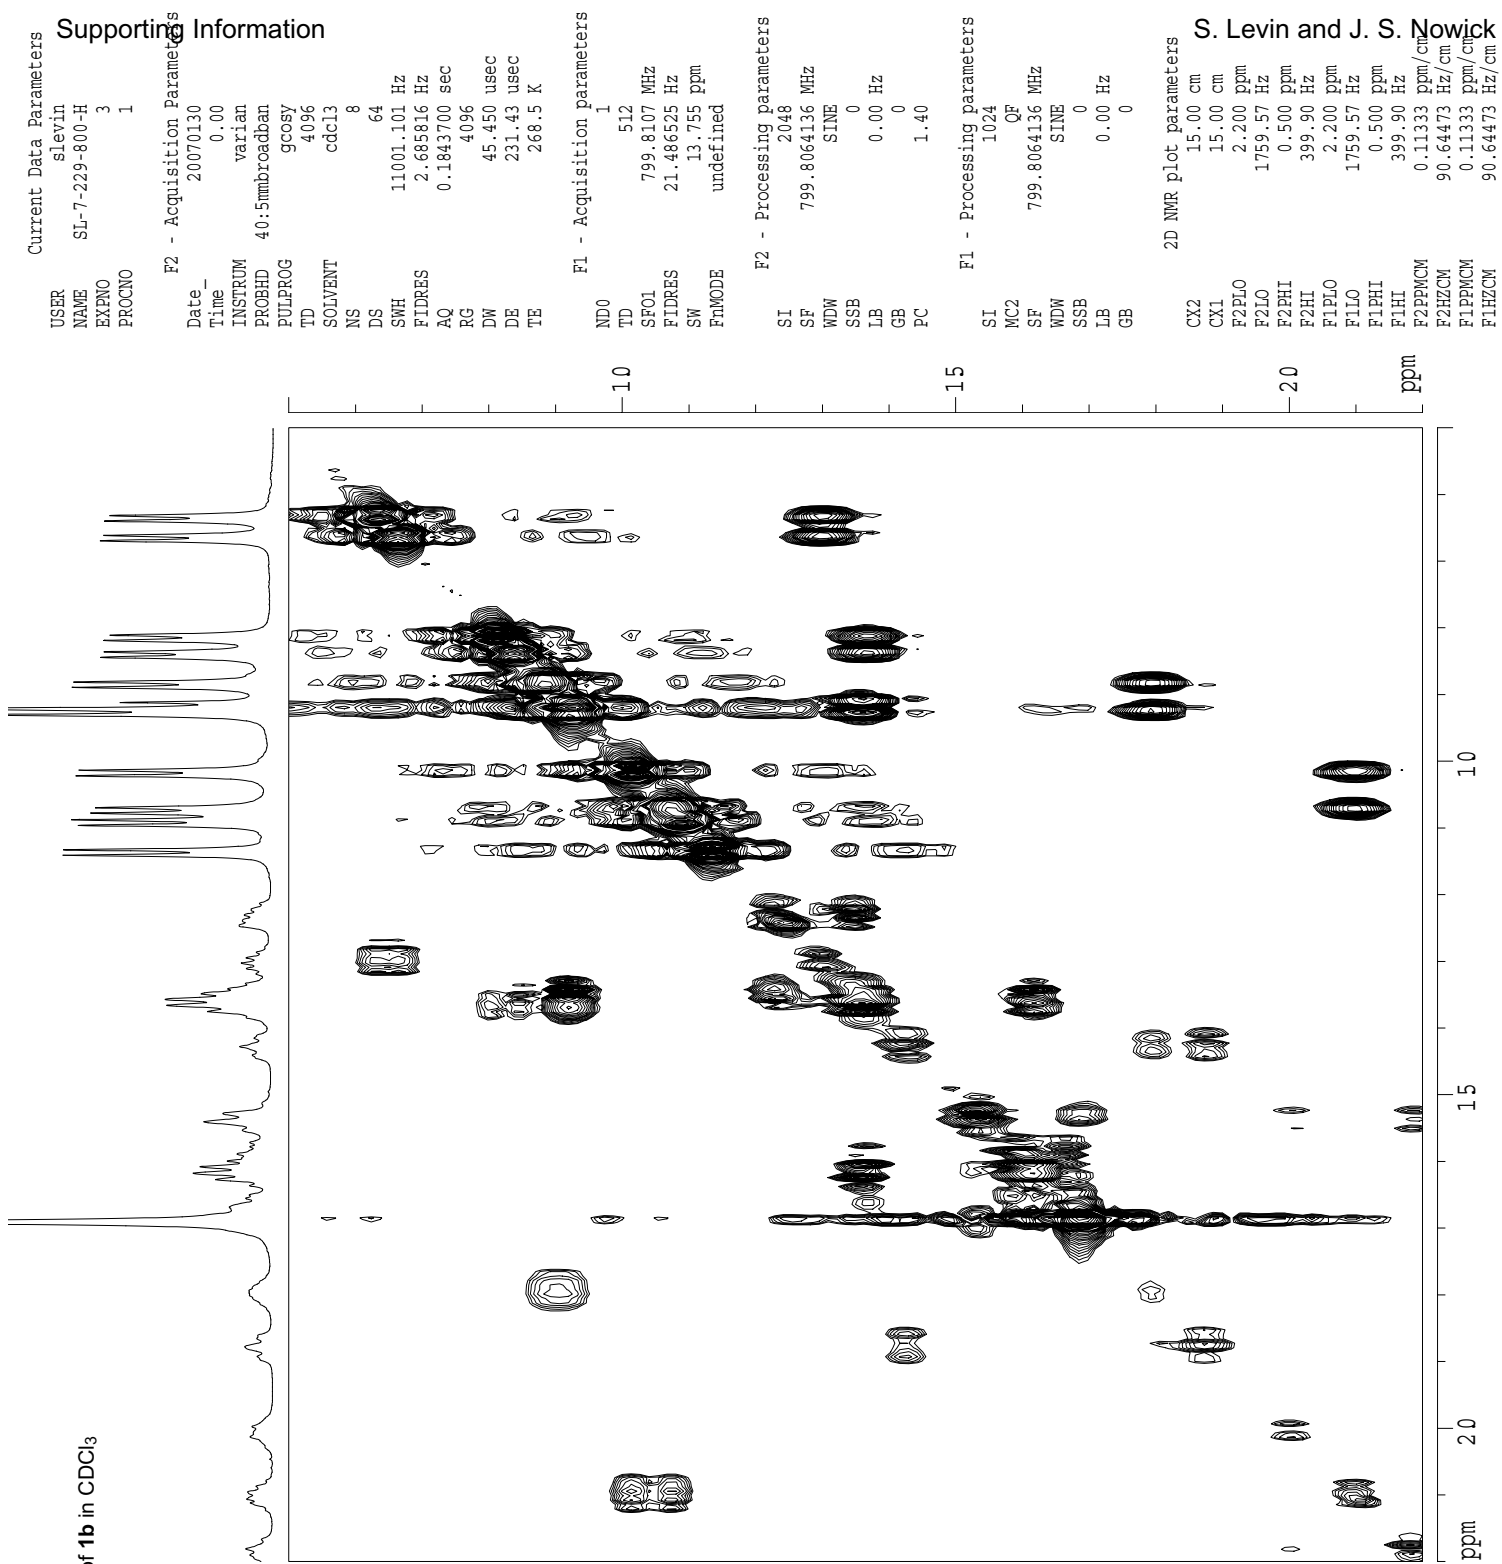

Supporting Information

S. Levin and J. S. Nowick

Current Data Parameters  
 USER slewin  
 NAME SL-7-229-800-H  
 EXPNO 3  
 PROCNO 1

F2 - Acquisition Parameters

Date\_ 20070130  
 Time\_ 0.00  
 INSTRUM varian  
 PROBHD 40:5mm broadband  
 PULPROG gcosy  
 TD 4096  
 SOLVENT cdc13  
 NS 8  
 DS 64  
 SWH 11001.101 Hz  
 FIDRES 2.685816 Hz  
 AQ 0.1843700 sec  
 RG 4096  
 DW 45.450 usec  
 DE 231.43 usec  
 TE 268.5 K

F1 - Acquisition parameters

ND0 1  
 TD 512  
 SFO1 799.8107 MHz  
 FIDRES 21.486525 Hz  
 SW 13.755 ppm  
 FhMODE undefined

F2 - Processing parameters

SI 2048  
 SF 799.8064136 MHz  
 WDW SINE  
 SSB 0  
 LB 0.00 Hz  
 GB 0  
 PC 1.40

F1 - Processing parameters

SI 1024  
 MC2 OF  
 SF 799.8064136 MHz  
 WDW SINE  
 SSB 0  
 LB 0.00 Hz  
 GB 0

2D NMR plot parameters

CX2 15.00 cm  
 CX1 15.00 cm  
 F2FLO 5.500 ppm  
 F2LO 4398.94 Hz  
 F2PHI -0.100 ppm  
 F2HI -79.98 Hz  
 F1FLO 11.007 ppm  
 F1LO 8803.10 Hz  
 F1PHI 5.499 ppm  
 F1HI 4398.36 Hz  
 F2PpMCM 0.37333 ppm/cm  
 F2HzCM 298.59439 Hz/cm  
 F1PpMCM 0.36715 ppm/cm  
 F1HzCM 293.64917 Hz/cm

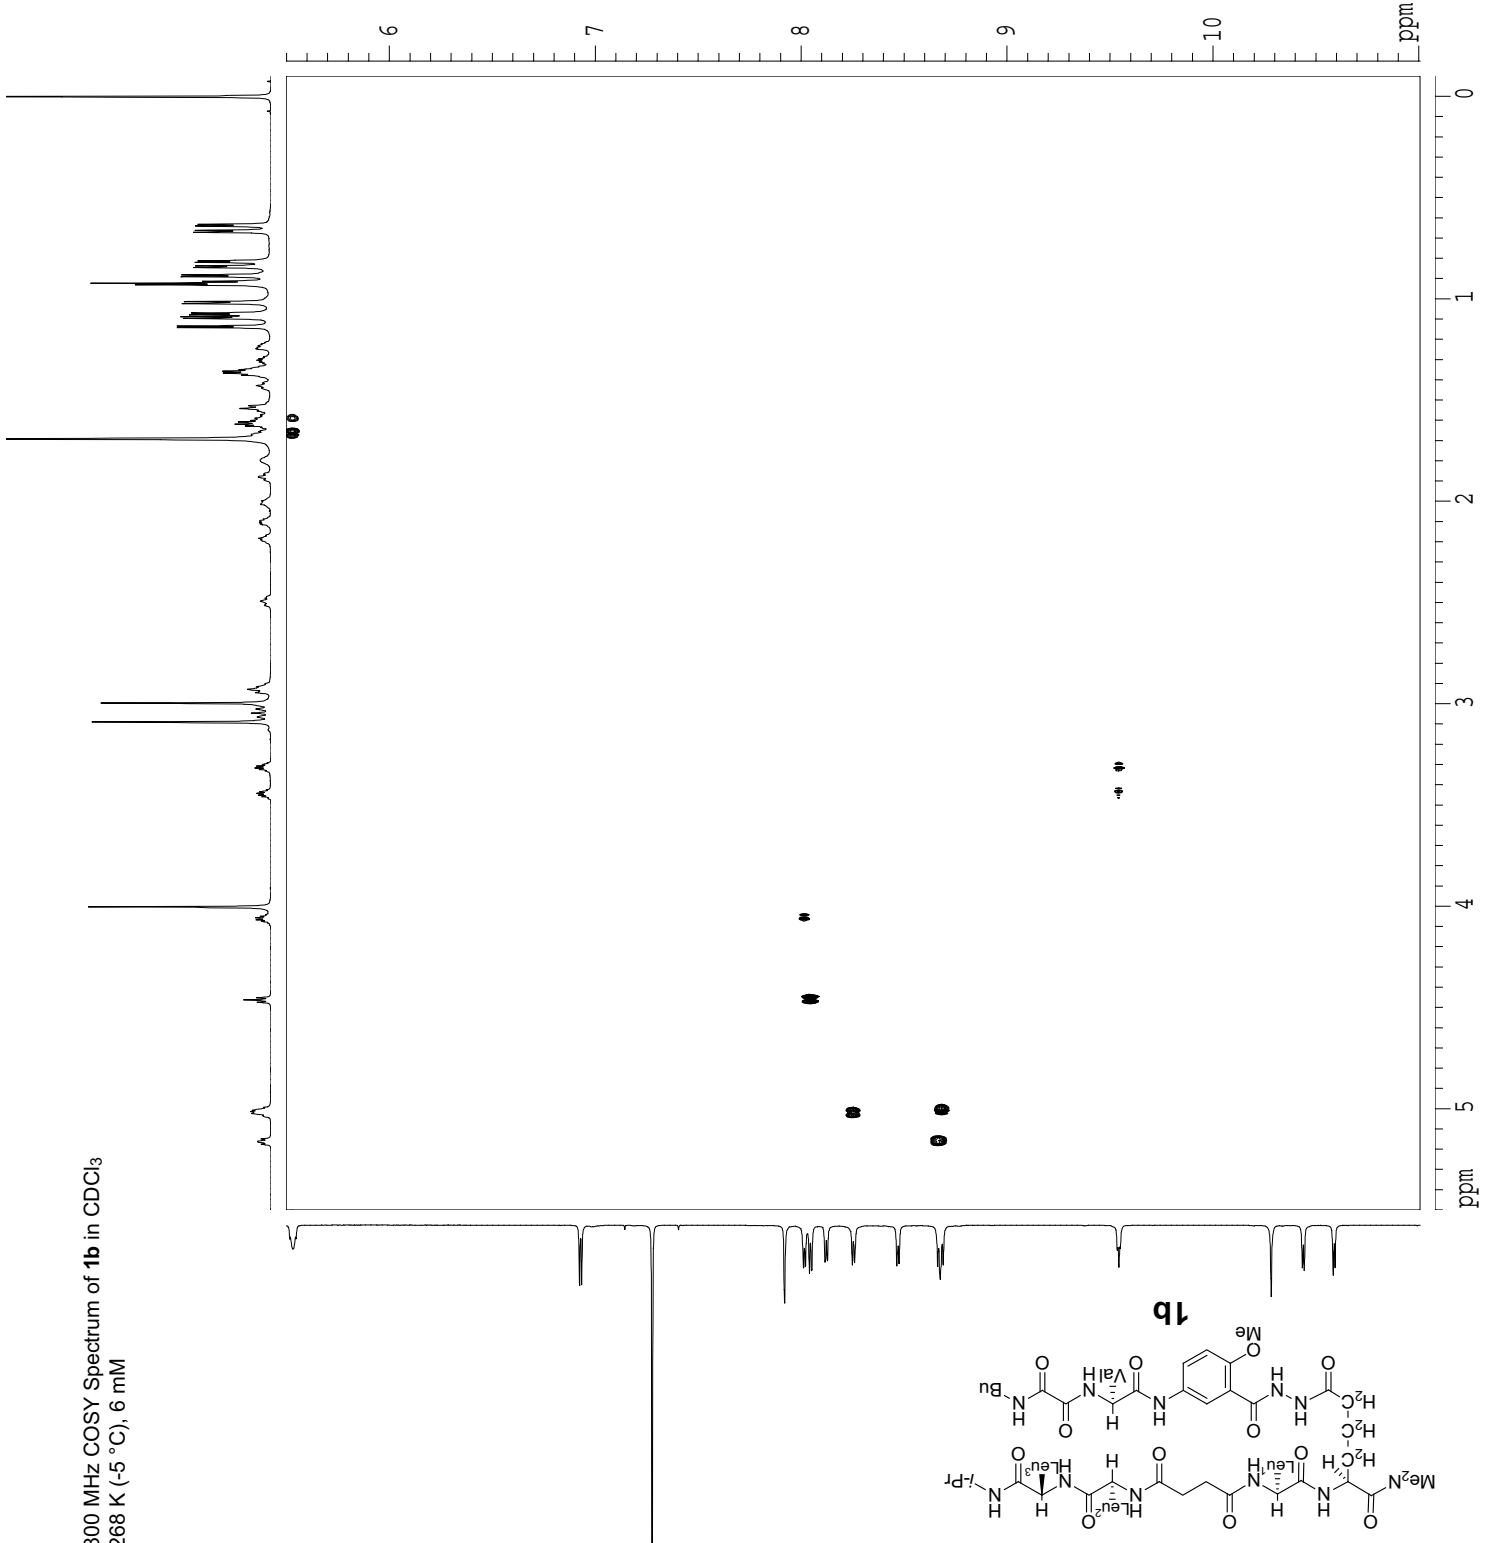

800 MHz COSY Spectrum of **1b** in CDCl<sub>3</sub>  
 268 K (-5 °C), 6 mM

Current Data Parameters  
 USER slevin  
 NAME SL-7-229-800-H  
 EXPNO 3  
 PROCNO 1

## F2 - Acquisition Parameters

Date 20070130  
 Time 0.00  
 INSTRUM varian  
 PROBHD 40:5mm broadband  
 PULPROG gcpsy  
 TD 4096  
 SOLVENT cdcl3  
 NS 8  
 DS 64  
 SWH 11001.101 Hz  
 FIDRES 2.685816 Hz  
 AQ 0.1843700 sec  
 RG 4096  
 DW 45.450 usec  
 DE 231.43 usec  
 TE 268.5 K

## F1 - Acquisition Parameters

ND0 1  
 TD 512  
 SF01 799.8107 MHz  
 FIDRES 21.486525 Hz  
 SW 13.755 ppm  
 F1MODE undefined

## F2 - Processing parameters

SI 2048  
 SF 799.8064136 MHz  
 WDW SINE  
 SSB 0  
 LB 0.00 Hz  
 GB 0  
 PC 1.40

## F1 - Processing parameters

SI 1024  
 MC2 QF  
 SF 799.8064136 MHz  
 WDW SINE  
 SSB 0  
 LB 0.00 Hz  
 GB 0

## 2D NMR plot parameters

CX2 15.00 cm  
 CX1 15.00 cm  
 F2PLO 11.007 ppm  
 F2LO 8803.10 Hz  
 F2PHI 5.493 ppm  
 F2HI 4392.99 Hz  
 F1PLO 11.007 ppm  
 F1LO 8803.10 Hz  
 F1PHI 5.500 ppm  
 F1HI 4398.94 Hz  
 F2PPMCM 0.36760 ppm/cm  
 F2HZCM 294.00726 Hz/cm  
 F1PPMCM 0.36710 ppm/cm  
 F1HZCM 293.61072 Hz/cm

800 MHz COSY Spectrum of **1b** in CDCl<sub>3</sub>  
 268 K (-5 °C), 6 mM

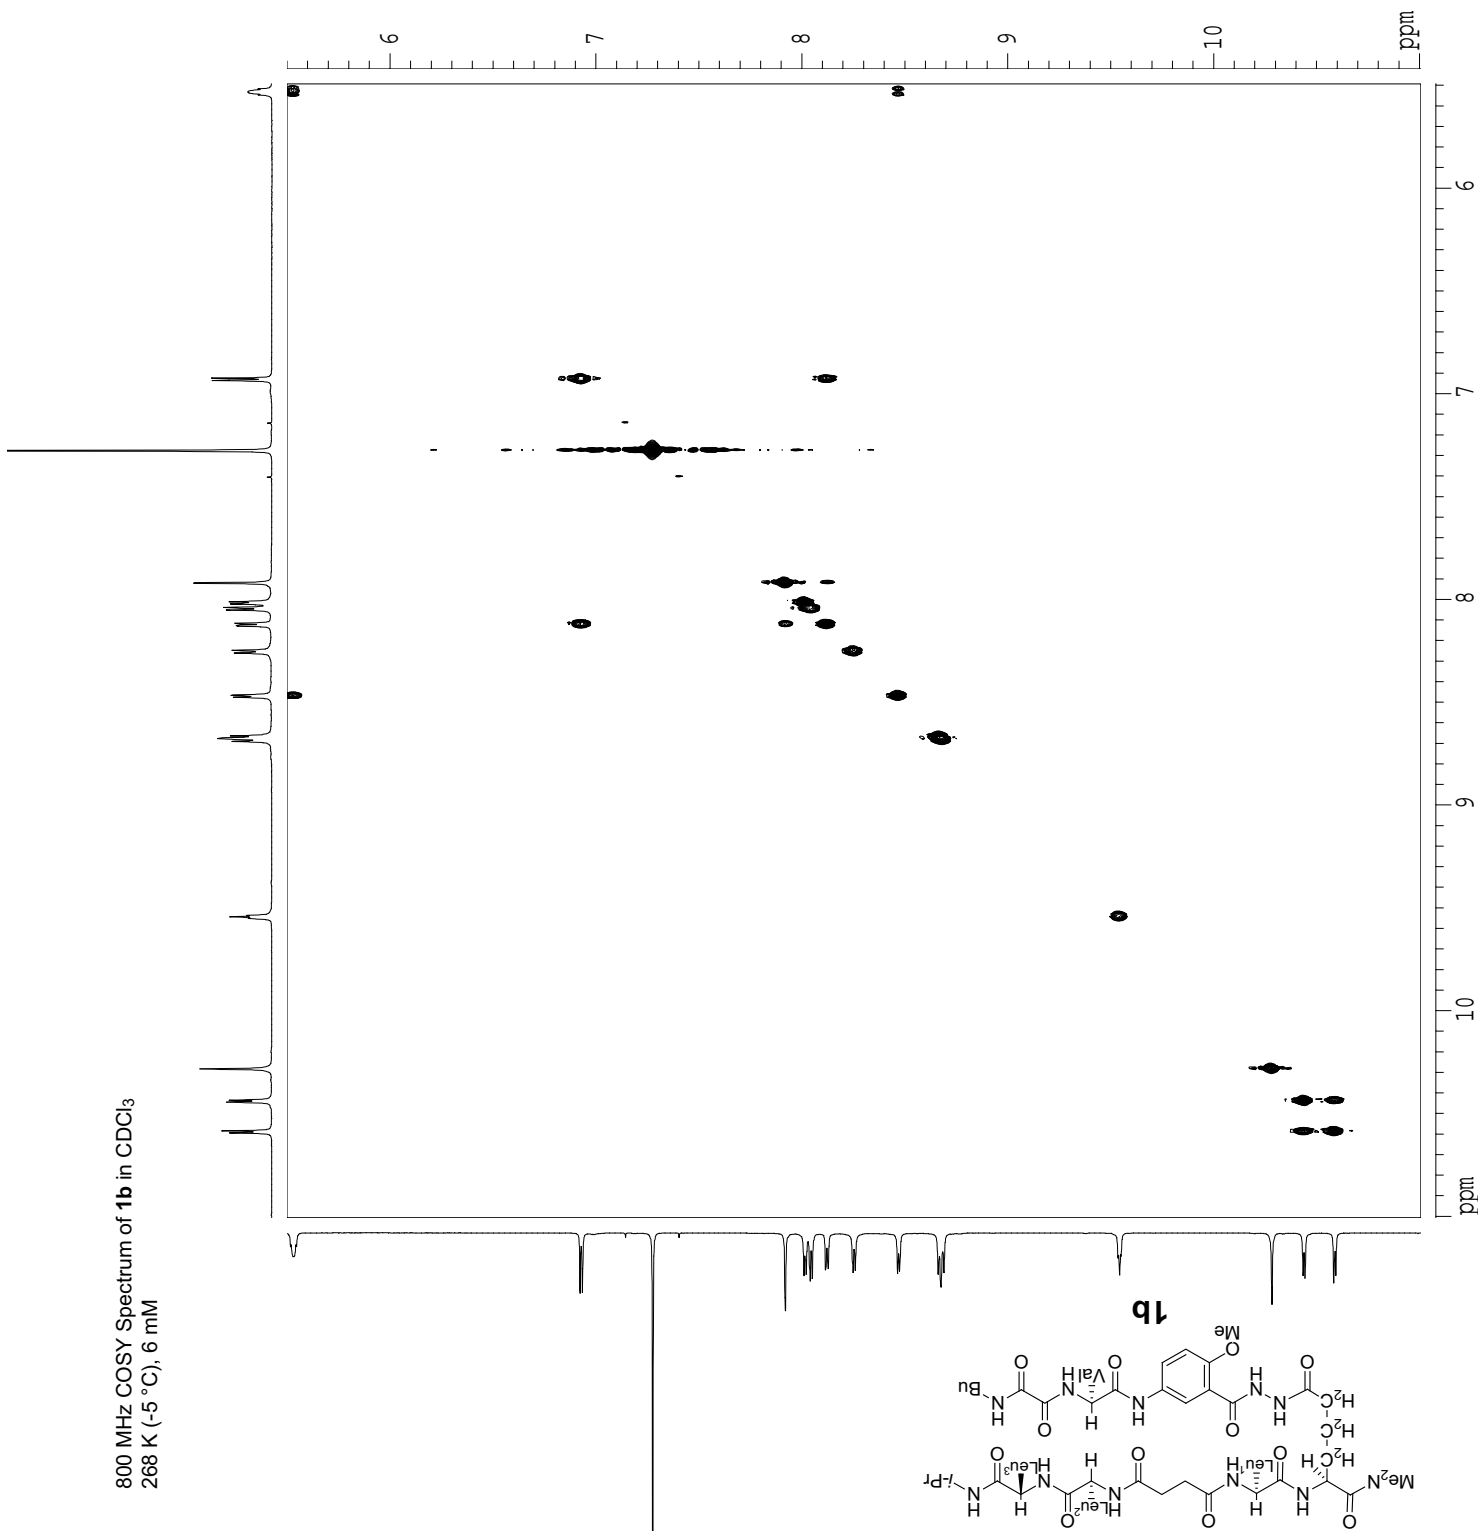

Supporting Information

Current Data Parameters

USER slevin  
 NAME SL-7-229-800-H  
 EXPNO 3  
 PROCNO 1

F2 - Acquisition Parameters

Date\_ 20070130  
 Time\_ 0.00  
 INSTRUM varian  
 PROBHD 40:5mm broadband  
 PULPROG gcosy  
 TD 4096  
 SOLVENT cdcl3  
 NS 8  
 DS 64  
 SWH 11001.101 Hz  
 FIDRES 2.685816 Hz  
 AQ 0.1843700 sec  
 RG 4096  
 DW 45.450 usec  
 DE 231.43 usec  
 TE 268.5 K

F1 - Acquisition parameters

ND0 1  
 TD 512  
 SF01 799.8107 MHz  
 FIDRES 21.486525 Hz  
 SW 13.755 ppm  
 FhMODE undefined

F2 - Processing parameters

SI 2048  
 SF 799.8064136 MHz  
 WDW SINE  
 SSB 0  
 LB 0.00 Hz  
 GB 0  
 PC 1.40

F1 - Processing parameters

SI 1024  
 MC2 OF  
 SF 799.8064136 MHz  
 WDW SINE  
 SSB 0  
 LB 0.00 Hz  
 GB 0

2D NMR plot parameters

CX2 15.00 cm  
 CX1 15.00 cm  
 F2PLO 11.000 ppm  
 F2LO 8797.87 Hz  
 F2PHI 5.500 ppm  
 F2HI 4398.94 Hz  
 F1PLO 5.513 ppm  
 F1LO 4409.10 Hz  
 F1PHI -0.102 ppm  
 F1HI -81.58 Hz  
 F2PPMCM 0.36667 ppm/cm  
 F2HZCM 293.26236 Hz/cm  
 F1PPMCM 0.37431 ppm/cm  
 F1HZCM 299.37891 Hz/cm

800 MHz COSY Spectrum of **1b** in CDCl<sub>3</sub>  
 268 K (-5 °C), 6 mM

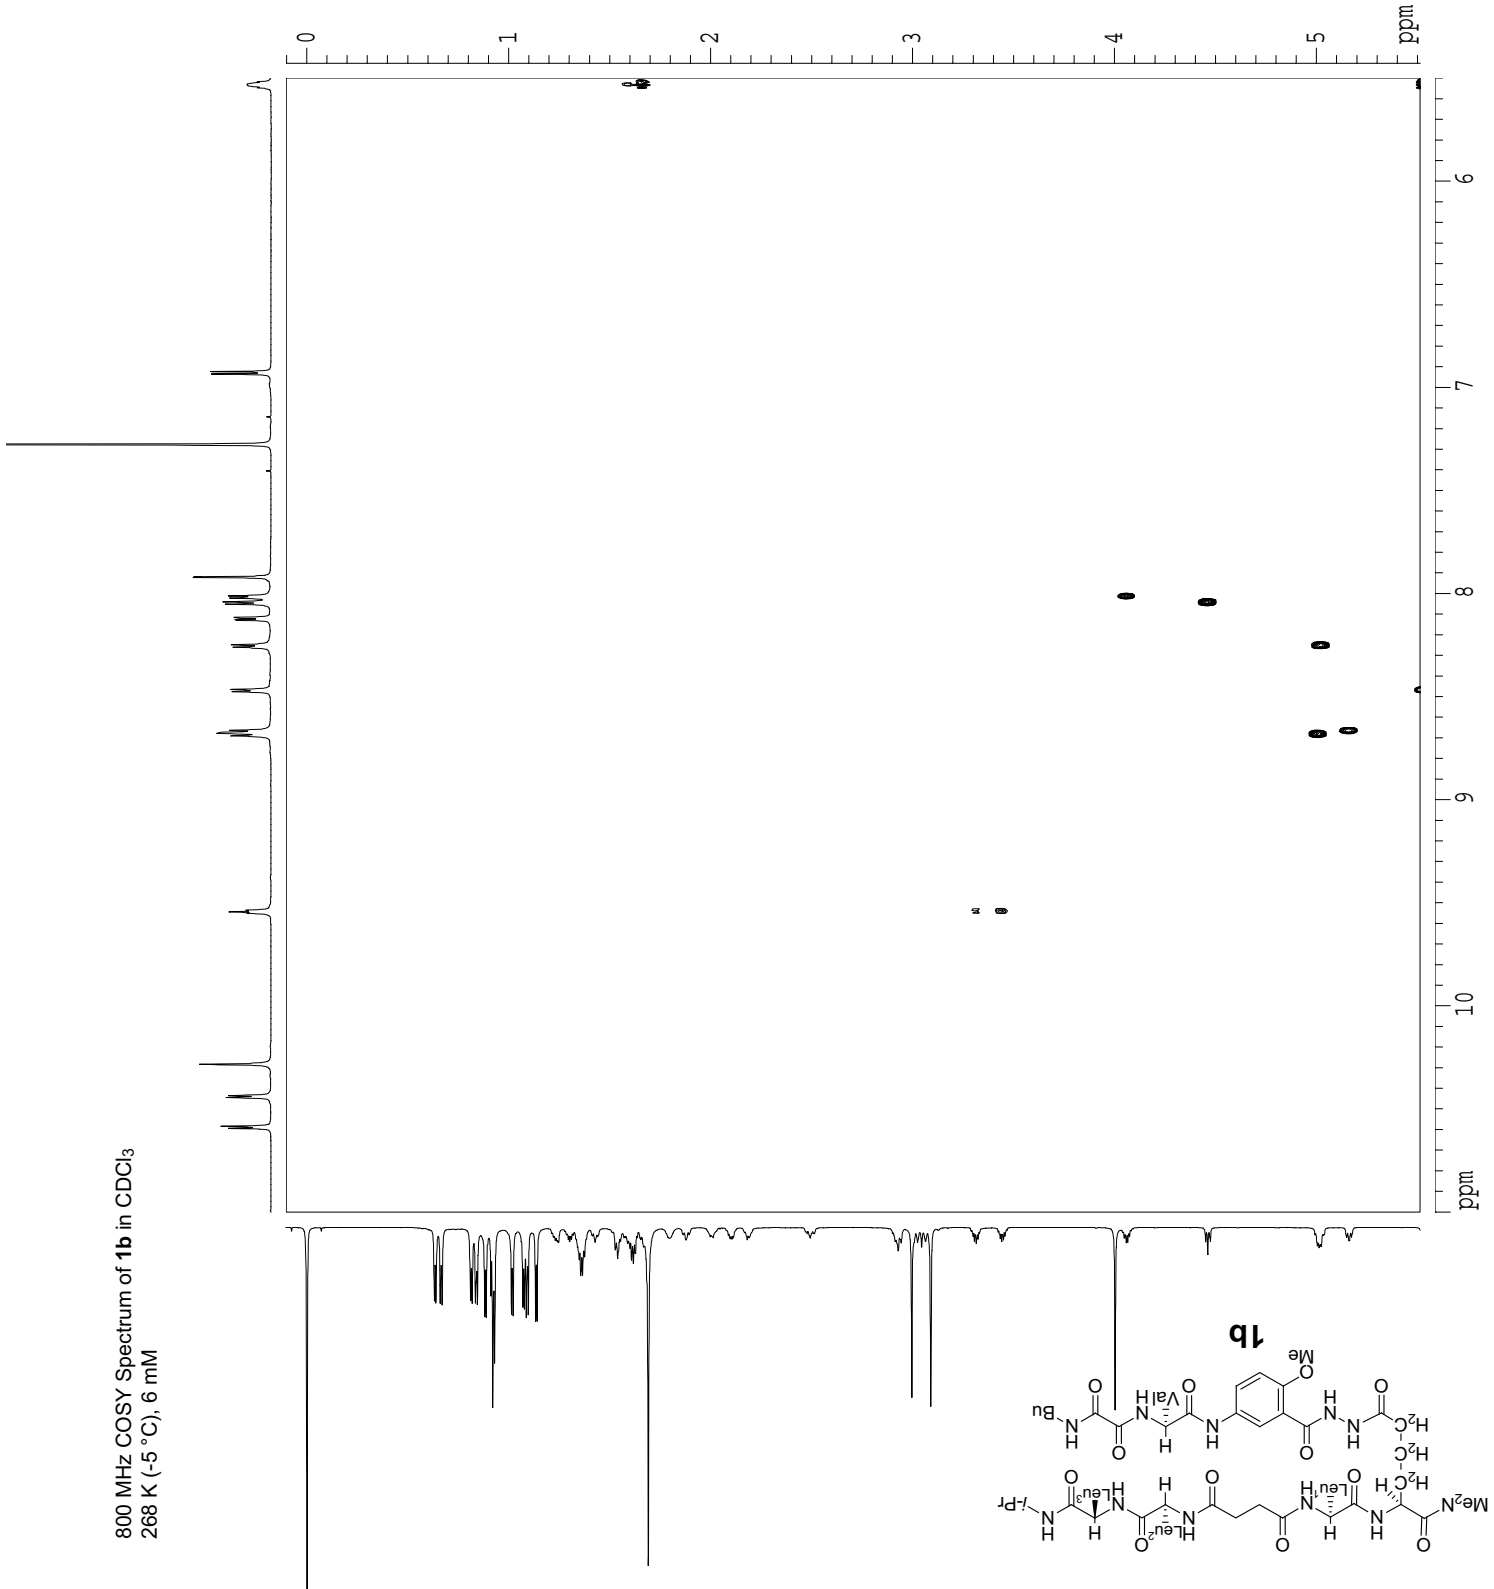



Supporting Information

Current Data Parameters  
 USER slevin  
 NAME SL-7-229-800-H  
 EXPNO 3  
 PROCNO 1

F2 - Acquisition Parameters

Date\_ 20070130  
 Time 0.00  
 INSTRUM varian  
 PROBHD 40:5mmbroadban  
 PULPROG gcpsy  
 TD 4096  
 SOLVENT cdc13  
 NS 8  
 DS 64  
 SWH 11001.101 Hz  
 FIDRES 2.685816 Hz  
 AQ 0.1843700 sec  
 RG 4096  
 DW 45.450 usec  
 DE 231.43 usec  
 TE 268.5 K

F1 - Acquisition Parameters

ND0 1  
 TD 512  
 SF01 799.8107 MHz  
 FIDRES 21.486525 Hz  
 SW 13.755 ppm  
 F1MODE undefined

F2 - Processing Parameters

SI 2048  
 SF 799.8064136 MHz  
 WDW SINE  
 SSB 0  
 LB 0.00 Hz  
 GB 0  
 PC 1.40

F1 - Processing Parameters

SI 1024  
 MC2 QF  
 SF 799.8064136 MHz  
 WDW SINE  
 SSB 0  
 LB 0.00 Hz  
 GB 0

2D NMR plot parameters

CX2 15.00 cm  
 CX1 15.00 cm  
 F2PLO 11.000 ppm  
 F2LO 8797.87 Hz  
 F2PHI -0.100 ppm  
 F2HI -79.98 Hz  
 F1PLO 11.000 ppm  
 F1LO 8797.87 Hz  
 F1PHI -0.100 ppm  
 F1HI -79.98 Hz  
 F2PPMCM 0.74000 ppm/cm  
 F2HZCM 591.85669 Hz/cm  
 F1PPMCM 0.74000 ppm/cm  
 F1HZCM 591.85669 Hz/cm

800 MHz COSY Spectrum of **1b** in CDCl<sub>3</sub>  
 268 K (-5 °C), 6 mM

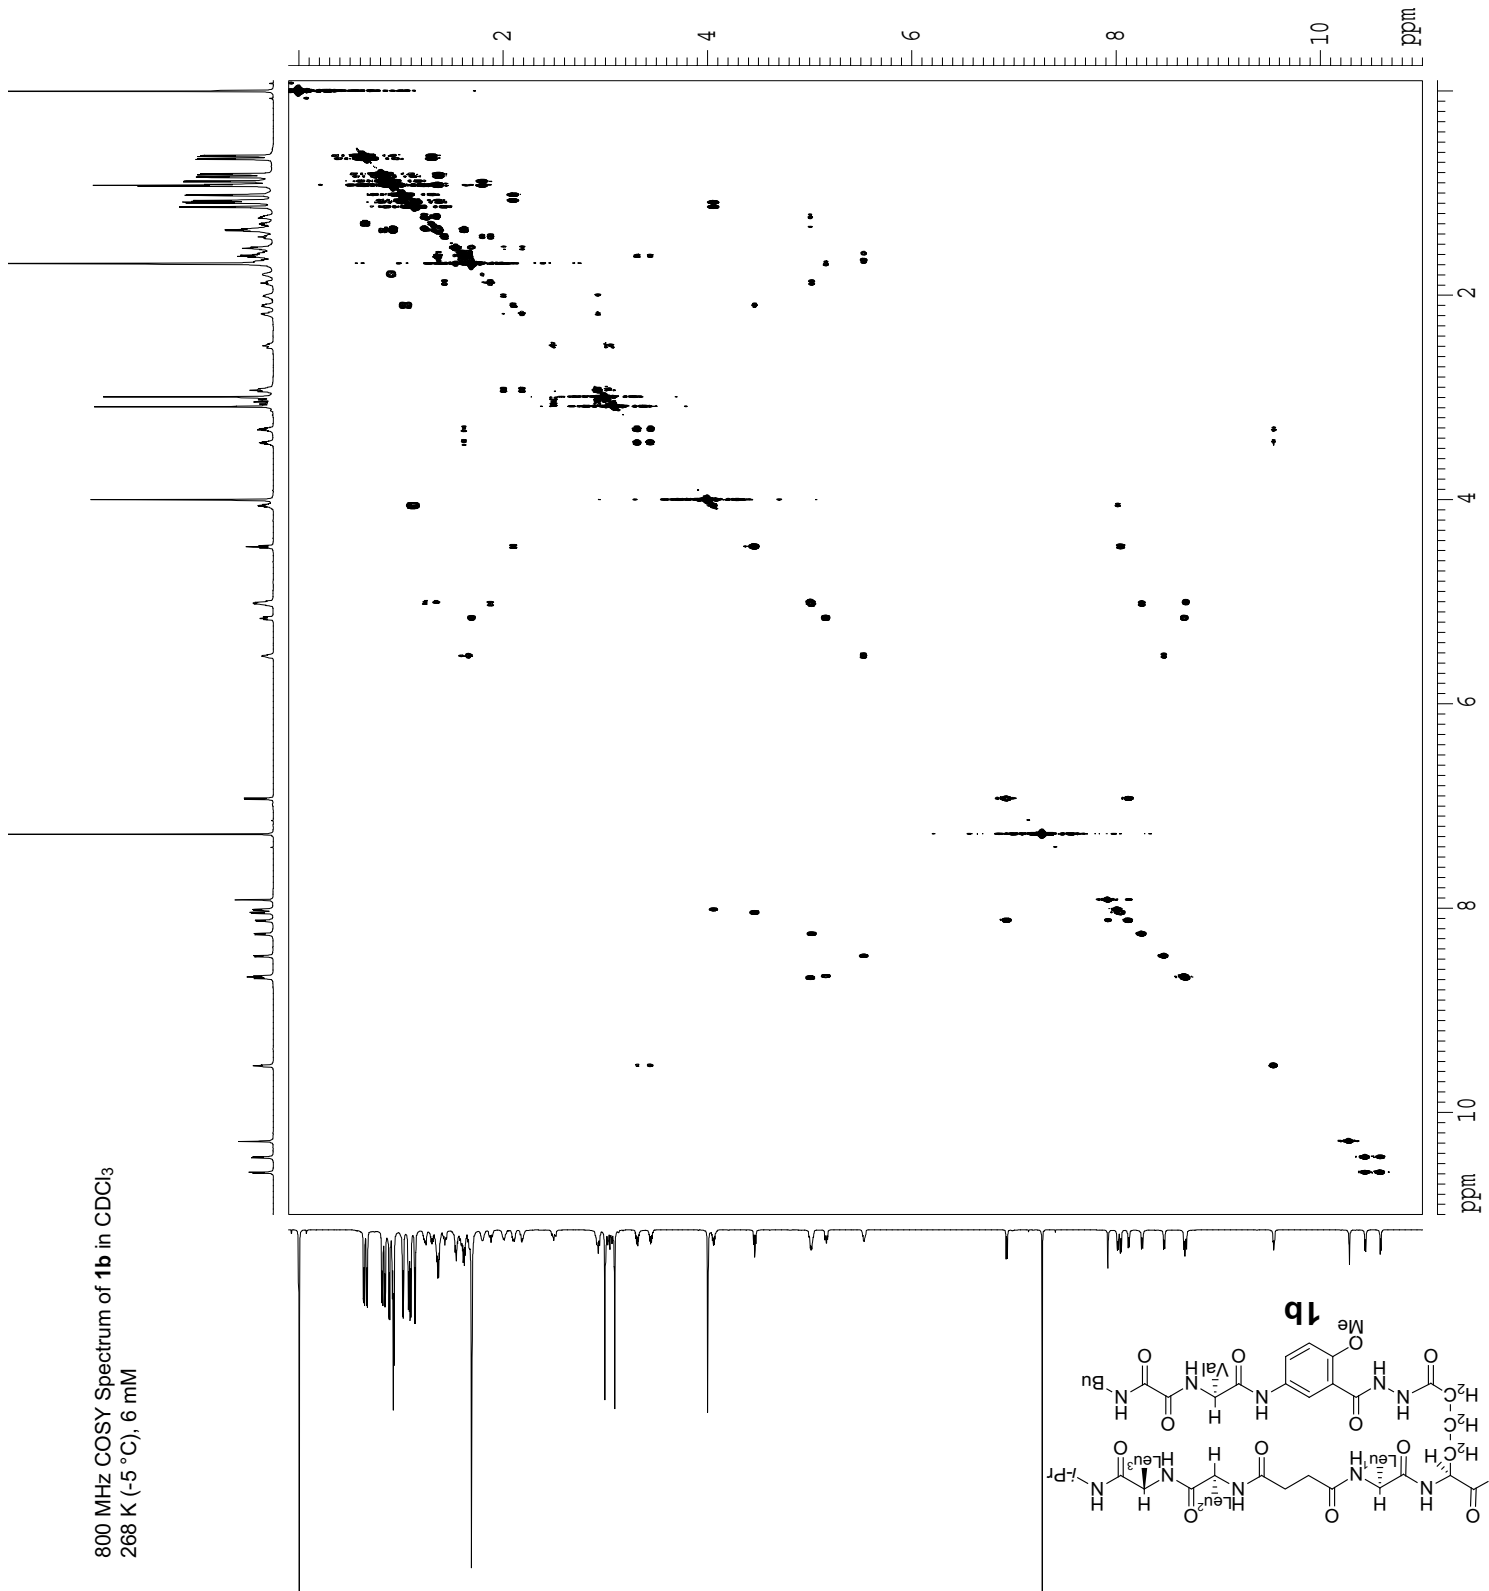

Supporting Information

Current Data Parameters  
 USER slevin  
 NAME SL-7-229-800-H  
 EXPNO 4  
 PROCNO 1

F2 - Acquisition Parameters

Date\_ 20070131  
 Time\_ 0.00  
 INSTRUM varian  
 PROBHD 40:5mmbroadban  
 PULPROG wgtocsy\_bn  
 TD 4096  
 SOLVENT CDCl3  
 NS 16  
 DS 64  
 SWH 11001.101 Hz  
 FIDRES 2.685816 Hz  
 AQ 0.1862132 sec  
 RG 287.4  
 DW 45.450 usec  
 DE 6.00 usec  
 TE 268.5 K

F1 - Acquisition Parameters

ND0 1  
 TD 1024  
 SF01 799.8107 MHz  
 FIDRES 10.743262 Hz  
 SW 13.755 ppm  
 FMODE undefined

F2 - Processing Parameters

SI 2048  
 SF 799.8064136 MHz  
 WDW QSINE  
 SSB 2  
 LB 0.00 Hz  
 GB 0  
 PC 1.40

F1 - Processing Parameters

SI 1024  
 MC2 States  
 SF 799.8064136 MHz  
 WDW QSINE  
 SSB 2  
 LB 0.00 Hz  
 GB 0

2D NMR plot parameters

CX2 15.00 cm  
 CX1 15.00 cm  
 F2PLO 11.000 ppm  
 F2LO 8797.87 Hz  
 F2PHI -0.100 ppm  
 F2HI -79.98 Hz  
 F1PLO 11.000 ppm  
 F1LO 8797.87 Hz  
 F1PHI -0.100 ppm  
 F1HI -79.98 Hz  
 F2PQCM 0.74000 ppm/cm  
 F2HZCM 591.85669 Hz/cm  
 F1PQCM 0.74000 ppm/cm  
 F1HZCM 591.85669 Hz/cm

800 MHz TOCSY Spectrum of **1b** in CDCl<sub>3</sub>  
 50 ms mixing time  
 268 K (-5 °C), 6 mM

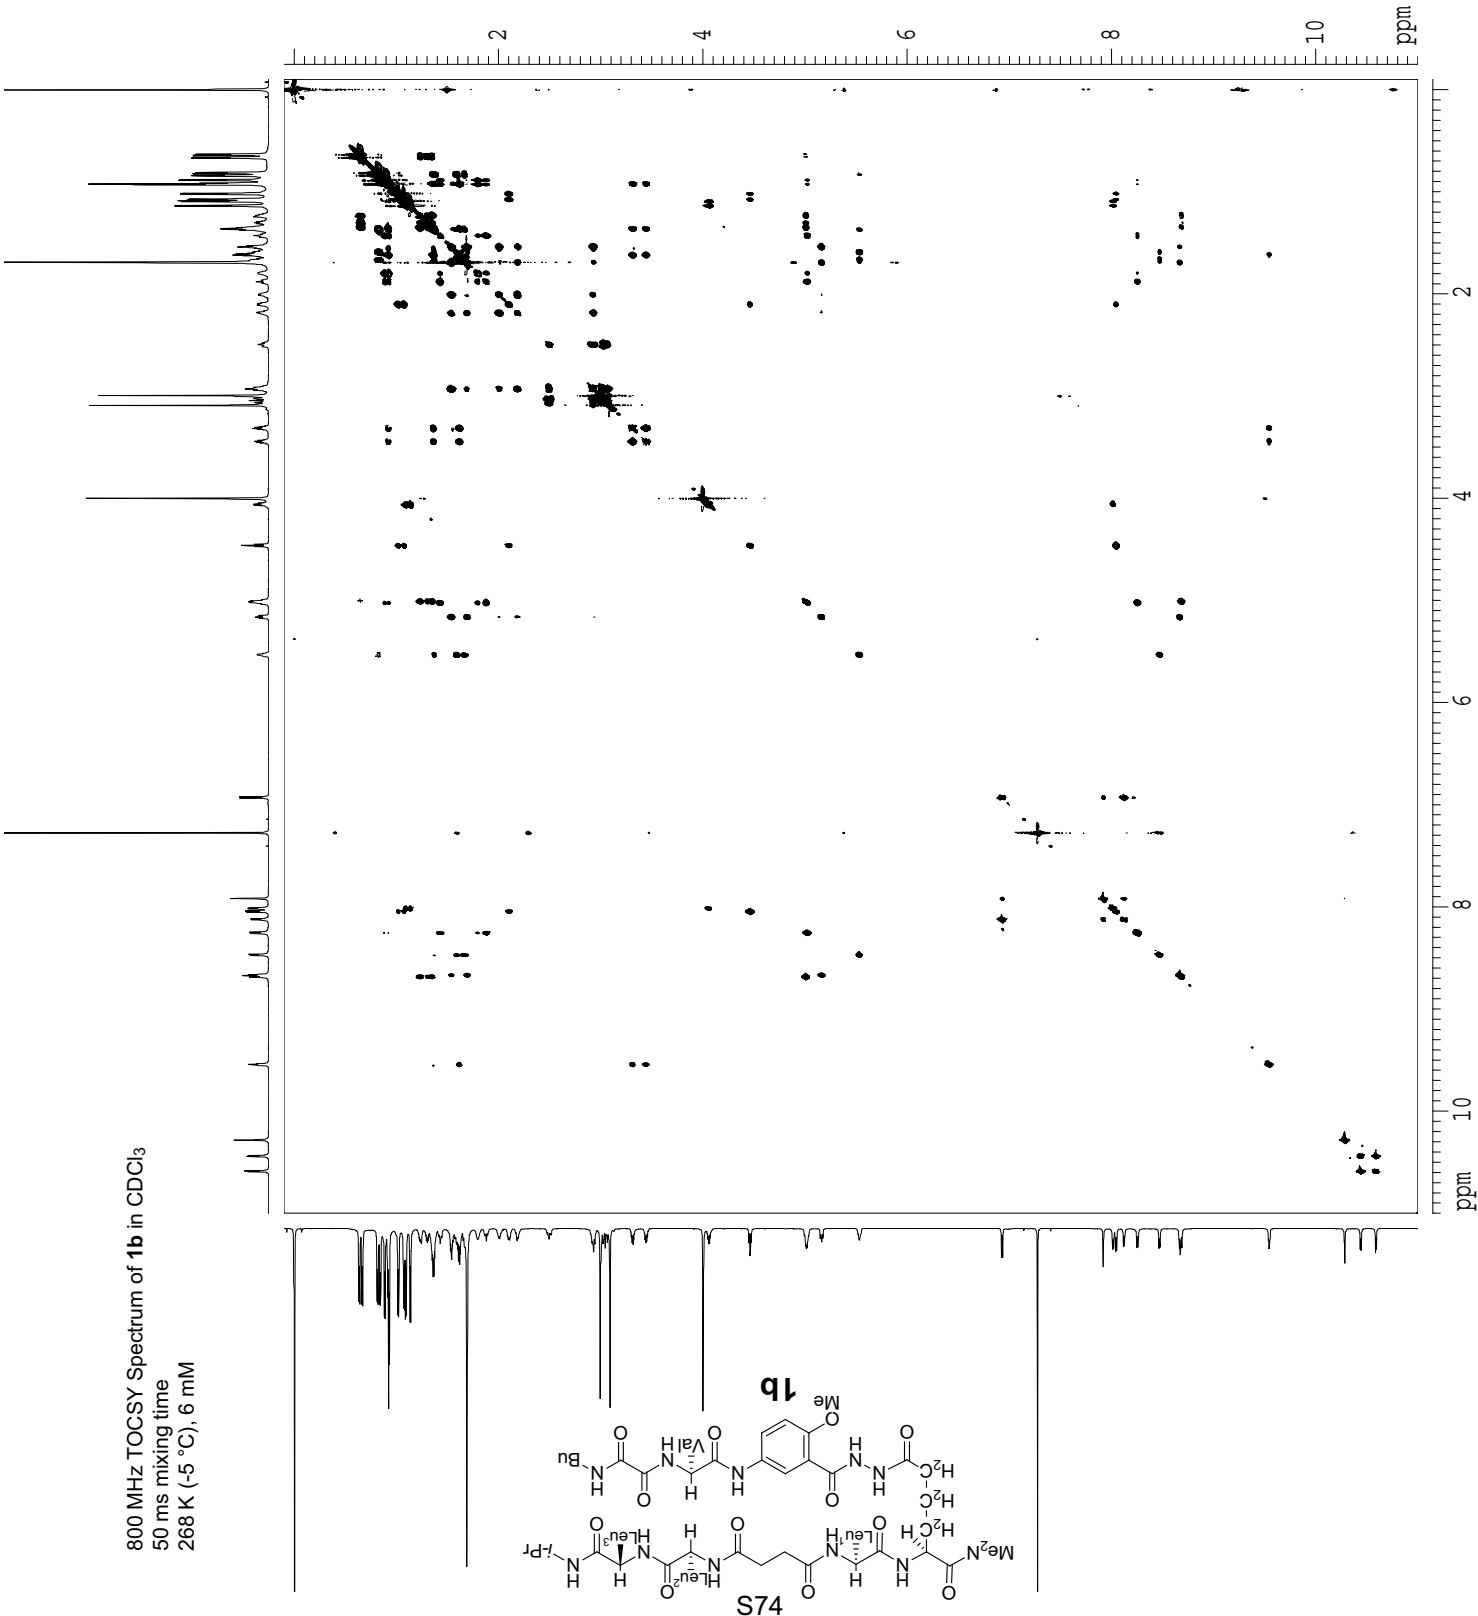

S74



Supporting Information

Current Data Parameters  
 USER slevin  
 NAME SL-7-229-800-H  
 EXPNO 4  
 PROCNO 1

F2 - Acquisition Parameters

Date 20070131  
 Time 0.00  
 INSTRUM varian  
 PROBHD 40:5mmbroadban  
 PULPROG wgtocsy\_bn  
 TD 4096  
 SOLVENT CDCl3  
 NS 16  
 DS 64  
 SWH 11001.101 Hz  
 FIDRES 2.685816 Hz  
 AQ 0.1862132 sec  
 RG 287.4  
 DW 45.450 usec  
 DE 6.00 usec  
 TE 268.5 K

F1 - Acquisition Parameters

ND0 1  
 TD 1024  
 SF01 799.8107 MHz  
 FIDRES 10.743262 Hz  
 SW 13.755 ppm  
 FMODE undefined

F2 - Processing parameters

SI 2048  
 SF 799.8064136 MHz  
 WDW QSI  
 SSB 2  
 LB 0.00 Hz  
 GB 0  
 PC 1.40

F1 - Processing parameters

SI 1024  
 MC2 States  
 SF 799.8064136 MHz  
 WDW QSI  
 SSB 2  
 LB 0.00 Hz  
 GB 0

S. Levin and J. S. Nowick

2D NMR plot parameters

CX2 15.00 cm  
 CX1 15.00 cm  
 F2PLO 5.662 ppm  
 F2LO 4528.29 Hz  
 F2PHI 4.157 ppm  
 F2HI 3325.04 Hz  
 F1PLO 2.371 ppm  
 F1LO 1896.19 Hz  
 F1PHI 0.557 ppm  
 F1HI 445.85 Hz  
 F2PPMCM 0.10029 ppm/cm  
 F2HZCM 80.21635 Hz/cm  
 F1PPMCM 0.12089 ppm/cm  
 F1HZCM 96.68935 Hz/cm

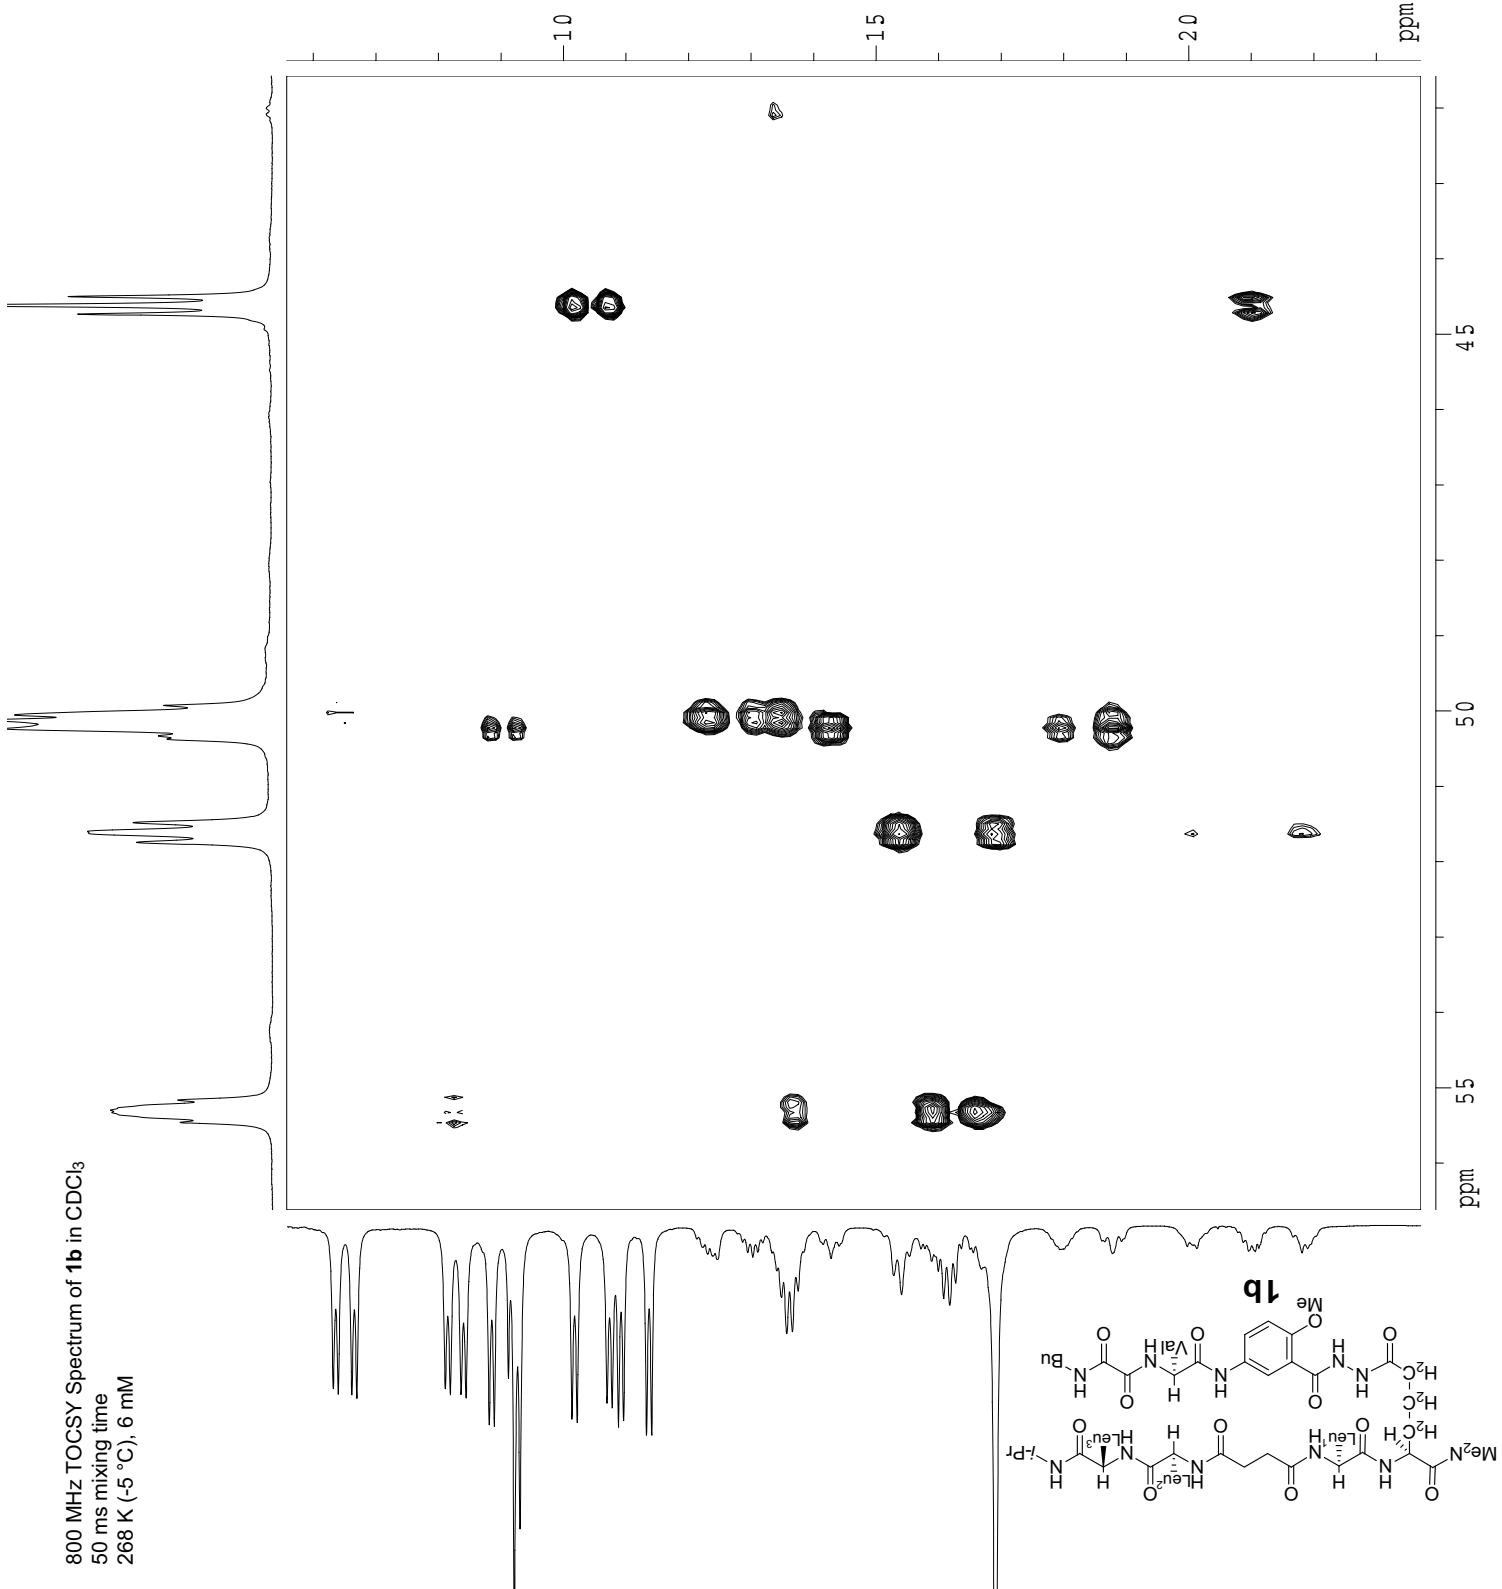



Supporting Information

S. Levin and J. S. Nowick

Current Data Parameters  
 USER sievin  
 NAME SL-7-229-800-H  
 EXPNO 4  
 PROCNO 1

F2 - Acquisition Parameters

Date\_ 20070131  
 Time 0.00  
 INSTRUM varian  
 PROBHD 40:5mm broadband  
 PULPROG wgtocsy bn  
 TD 4096  
 SOLVENT CDCl3  
 NS 16  
 DS 64  
 SWH 11001.101 Hz  
 FIDRES 2.685816 Hz  
 AQ 0.1862132 sec  
 RG 287.4  
 DW 45.450 usec  
 DE 6.00 usec  
 TE 268.5 K

F1 - Acquisition parameters

ND0 1  
 TD 1024  
 SF01 799.8107 MHz  
 FIDRES 10.743262 Hz  
 SW 13.755 ppm  
 F1MODE undefined

F2 - Processing parameters

SI 2048  
 SF 799.8064136 MHz  
 WDW QSINE  
 SSB 2  
 LB 0.00 Hz  
 GB 0  
 PC 1.40

F1 - Processing parameters

SI 1024  
 MC2 States  
 SF 799.8064136 MHz  
 WDW QSINE  
 SSB 2  
 LB 0.00 Hz  
 GB 0

2D NMR plot parameters

CX2 15.00 cm  
 CX1 15.00 cm  
 F2PLO 11.007 ppm  
 F2LO 8803.10 Hz  
 F2PHI 5.499 ppm  
 F2HI 4398.36 Hz  
 F1PLO 11.000 ppm  
 F1LO 8797.87 Hz  
 F1PHI 5.500 ppm  
 F1HI 4398.94 Hz  
 F2PVMCM 0.36715 ppm/cm  
 F2HZCM 293.64917 Hz/cm  
 F1PVMCM 0.36667 ppm/cm  
 F1HZCM 293.26236 Hz/cm

800 MHz TOCSY Spectrum of **1b** in CDCl<sub>3</sub>  
 50 ms mixing time  
 268 K (-5 °C), 6 mM

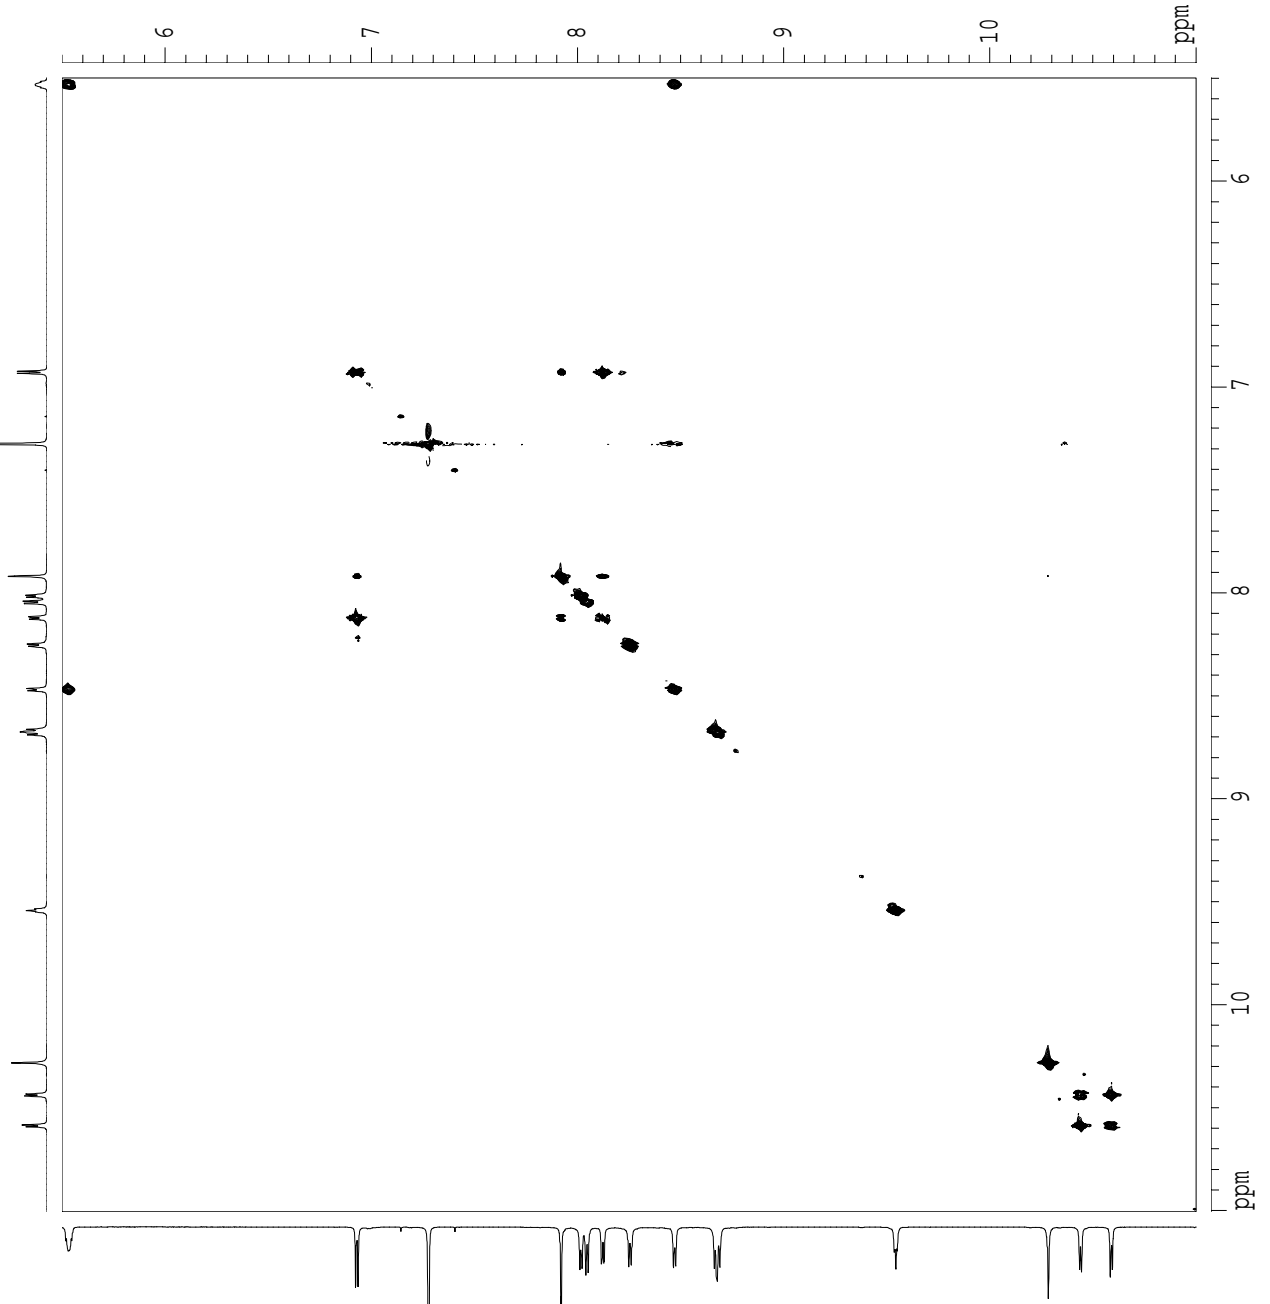

Supporting Information

S. Levin and J. S. Nowick

Current Data Parameters  
 USER slevin  
 NAME SL-7-229-800-H  
 EXPNO 4  
 PROCNO 1

F2 - Acquisition Parameters

Date\_ 20070131  
 Time 0.00  
 INSTRUM varian  
 PROBHD 40:5mm broadband  
 PULPROG wgtocsy\_bn  
 TD 4096  
 SOLVENT CDCl3  
 NS 16  
 DS 64  
 SWH 11001.101 Hz  
 FIDRES 2.685816 Hz  
 AQ 0.1862132 sec  
 RG 287.4  
 DW 45.450 usec  
 DE 6.00 usec  
 TE 268.5 K

F1 - Acquisition Parameters

ND0 1  
 TD 1024  
 SF01 799.8107 MHz  
 FIDRES 10.743262 Hz  
 SW 13.755 ppm  
 F1MODE undefined

F2 - Processing Parameters

SI 2048  
 SF 799.8064136 MHz  
 WDW QSSINE  
 SSB 2  
 LB 0.00 Hz  
 GB 0  
 PC 1.40

F1 - Processing Parameters

SI 1024  
 MC2 States  
 SF 799.8064136 MHz  
 WDW QSSINE  
 SSB 2  
 LB 0.00 Hz  
 GB 0

2D NMR plot parameters

CX2 15.00 cm  
 CX1 15.00 cm  
 F2PLO 11.000 ppm  
 F2LO 8797.87 Hz  
 F2PHI 5.500 ppm  
 F2HI 4398.94 Hz  
 F1PLO 5.513 ppm  
 F1LO 4409.10 Hz  
 F1PHI -0.102 ppm  
 F1HI -81.58 Hz  
 F2PPMCM 0.36667 ppm/cm  
 F2HZCM 293.26236 Hz/cm  
 F1PPMCM 0.37431 ppm/cm  
 F1HZCM 299.37891 Hz/cm

800 MHz TOCSY Spectrum of **1b** in CDCl<sub>3</sub>  
 50 ms mixing time  
 268 K (-5 °C), 6 mM

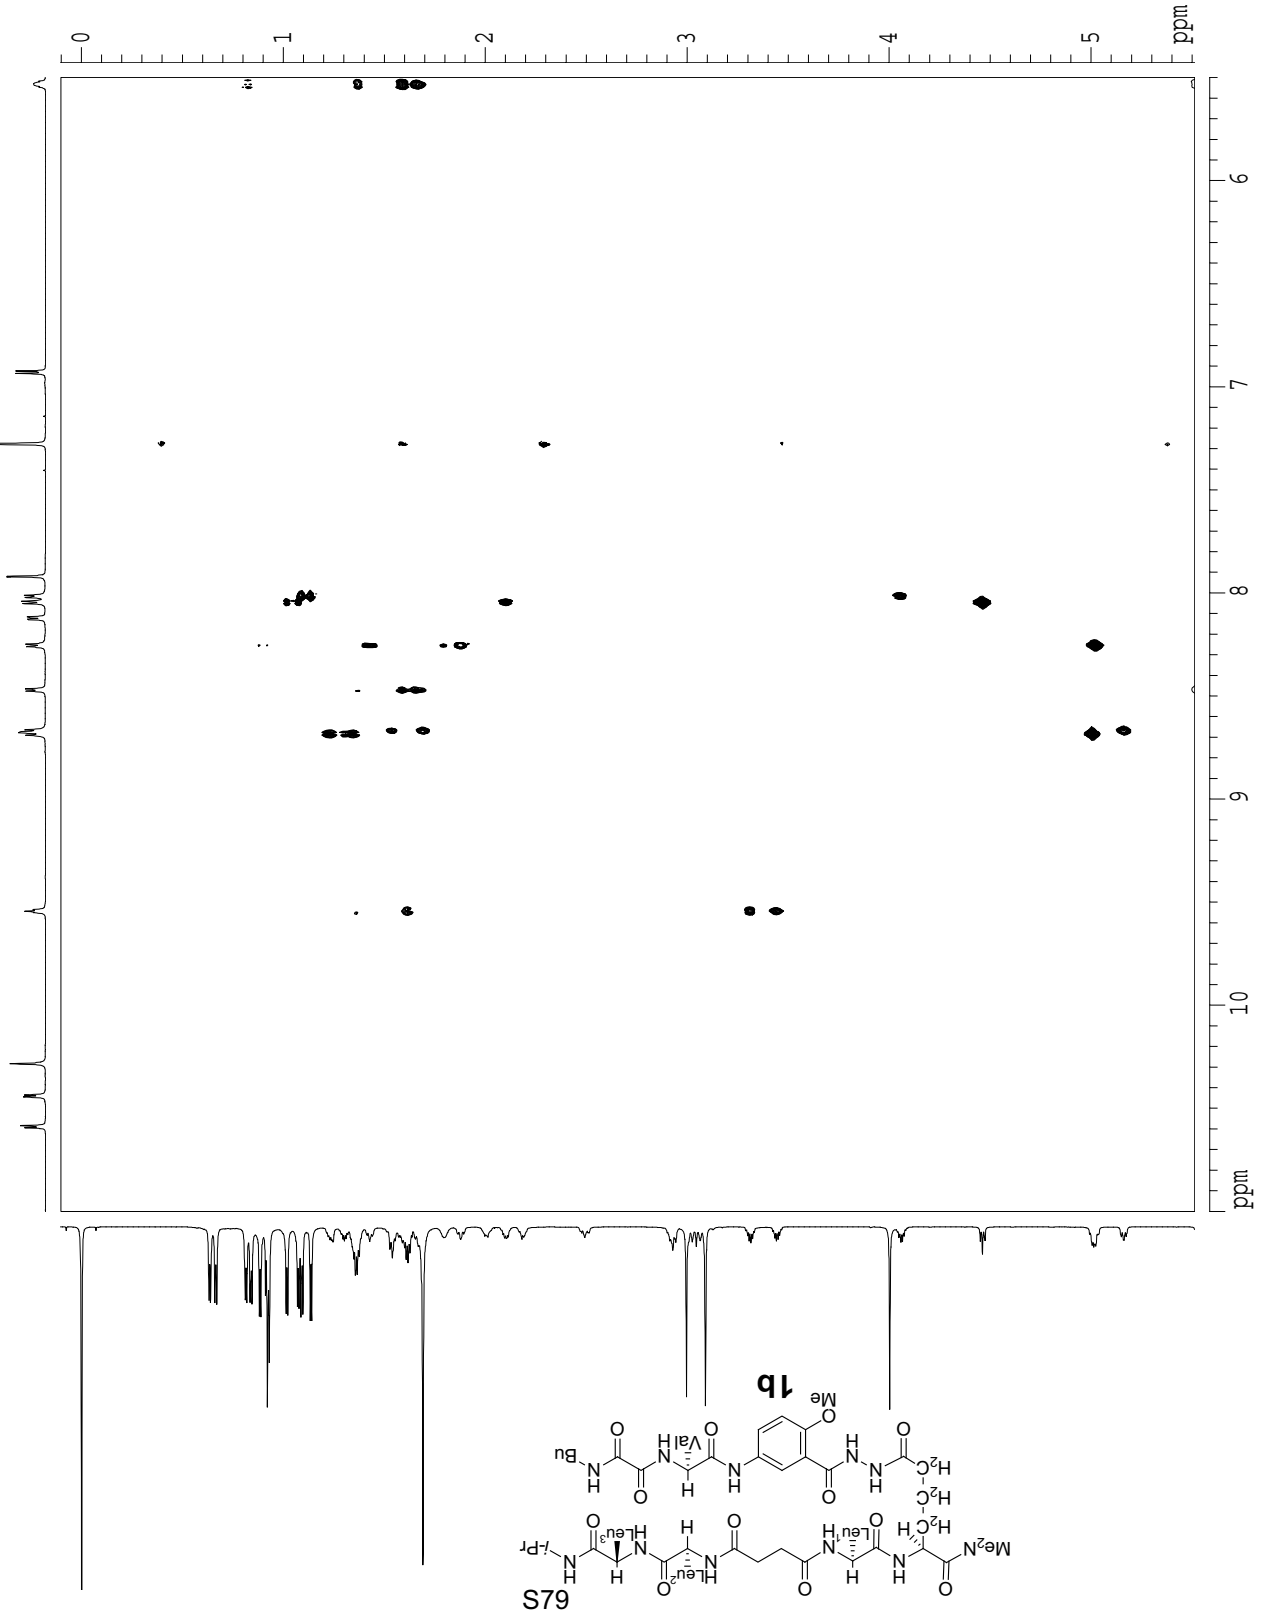

800 MHz TOCSY Spectrum of **1b** in CDCl<sub>3</sub>  
 50 ms mixing time  
 268 K (-5 °C), 6 mM

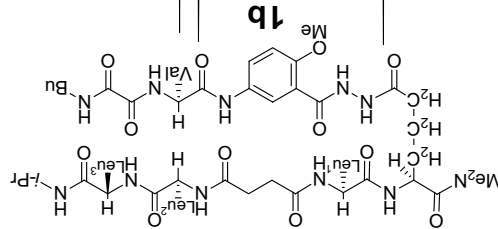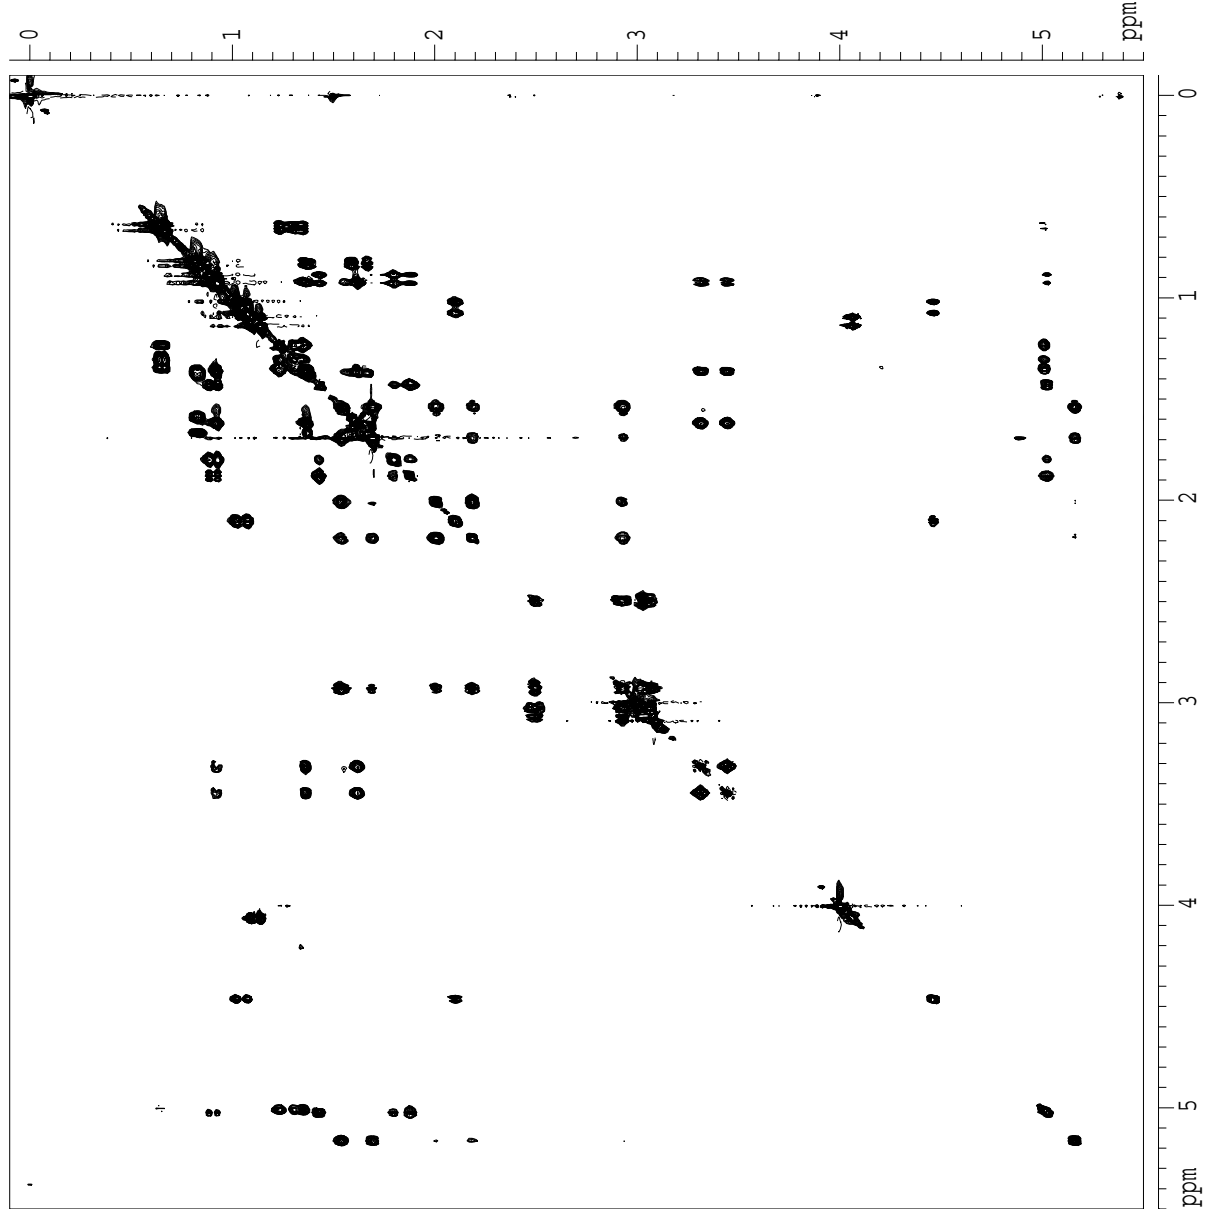

Supporting Information

Current Data Parameters  
 USER slevin  
 NAME SL-7-229-800-H  
 EXPNO 4  
 PROCNO 1

F2 - Acquisition Parameters  
 Date\_ 20070131  
 Time\_ 0.00  
 INSTRUM varian  
 PROBHD 40:5mm broadband  
 PULPROG wgtocpsy\_bn  
 TD 4096  
 SOLVENT CDC13  
 NS 16  
 DS 64  
 SWH 11001.101 Hz  
 FIDRES 2.685816 Hz  
 AQ 0.1862132 sec  
 RG 287.4  
 DW 45.450 usec  
 DE 6.00 usec  
 TE 268.5 K

F1 - Acquisition parameters  
 ND0 1  
 TD 1024  
 SFO1 799.8107 MHz  
 FIDRES 10.743262 Hz  
 SW 13.755 ppm  
 F1MODE undefined

F2 - Processing parameters  
 SI 2048  
 SF 799.8064136 MHz  
 WDW QSI  
 SSB 2  
 LB 0.00 Hz  
 GB 0  
 PC 1.40

F1 - Processing parameters  
 SI 1024  
 MC2 States  
 SF 799.8064136 MHz  
 WDW QSI  
 SSB 2  
 LB 0.00 Hz  
 GB 0

2D NMR plot parameters  
 CX2 15.00 cm  
 CX1 15.00 cm  
 F2PLO 5.500 ppm  
 F2LO 4398.94 Hz  
 F2PHI -0.100 ppm  
 F2HI -79.98 Hz  
 F1PLO 5.500 ppm  
 F1LO 4398.94 Hz  
 F1PHI -0.100 ppm  
 F1HI -79.98 Hz  
 F2PFCM 0.37333 ppm/cm  
 F2HZCM 298.59439 Hz/cm  
 F1PFCM 0.37333 ppm/cm  
 F1HZCM 298.59439 Hz/cm

S. Levin and J. S. Nowick



Supporting Information

Current Data Parameters  
 USER slevin  
 NAME SL-7-229-800-H  
 EXPNO 5  
 PROCNO 1

F2 - Acquisition Parameters  
 Date\_ 20070131  
 Time\_ 0.00  
 INSTRUM varian  
 PROBHD 40:5mm broadband  
 PULPROG noesyh2o\_pfg\_800\_pln  
 TD 4096  
 SOLVENT CDCl3  
 NS 16  
 DS 64  
 SWH 11001.101 Hz  
 FLDRES 2.685816 Hz  
 AQ 0.1862132 sec  
 RG 128  
 DW 45.450 usec  
 DE 6.00 usec  
 TE 268.5 K

F1 - Acquisition parameters  
 ND0 1  
 TD 1024  
 SF01 799.8107 MHz  
 FLDRES 10.743262 Hz  
 SW 13.755 ppm  
 FMODE undefined

F2 - Processing parameters  
 SI 2048  
 SF 799.8064136 MHz  
 MDW QSINE  
 SSB 2  
 LB 0.00 Hz  
 GB 0  
 PC 1.40

F1 - Processing parameters  
 SI 1024  
 MC2 States  
 SF 799.8064136 MHz  
 MDW QSINE  
 SSB 2  
 LB 0.00 Hz  
 GB 0

2D NMR plot parameters  
 CX2 15.00 cm  
 CX1 15.00 cm  
 F2PLO 11.001 ppm  
 F2LO 8798.73 Hz  
 F2PHI -0.101 ppm  
 F2HI -80.58 Hz  
 F1PLO 11.001 ppm  
 F1LO 8798.73 Hz  
 F1PHI -0.107 ppm  
 F1HI -85.95 Hz  
 F2PPMCM 0.74012 ppm/cm  
 F2HZCM 591.95374 Hz/cm  
 F1PPMCM 0.74057 ppm/cm  
 F1HZCM 592.31183 Hz/cm

800 MHz NOESY Spectrum of **1b** in CDCl<sub>3</sub>  
 400 ms mixing time  
 268 K (-5 °C), 6 mM

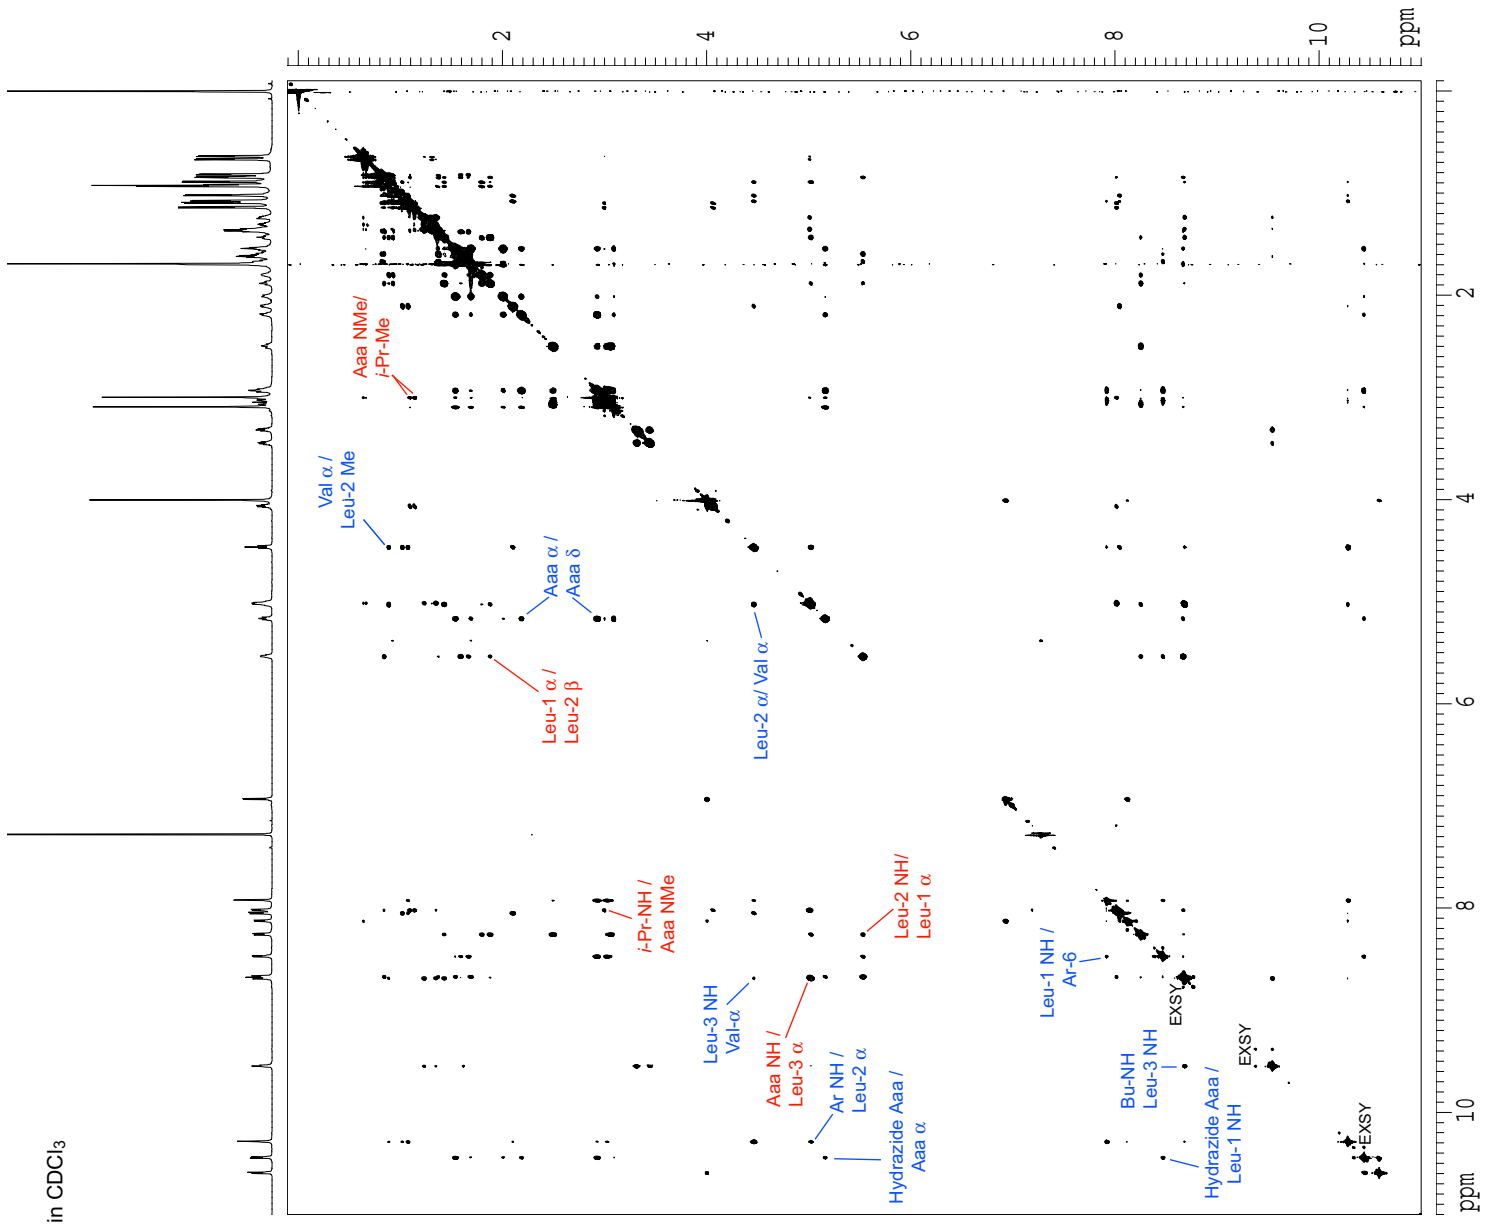

800 MHz NOESY Spectrum of **1b** in CDCl<sub>3</sub>  
 400 ms mixing time  
 268 K (-5 °C), 6 mM

Supporting Information

Current Data Parameters  
 USER slewin  
 NAME SL-7-229-800-H  
 EXPNO 5  
 PROCNO 1

F2 - Acquisition Parameters  
 Date\_ 20070131  
 Time 0.00  
 INSTRUM varian  
 PROBHD 40:5mm broadband  
 PULPROG noesyh2o\_pfg\_800\_pln  
 TD 4096  
 SOLVENT CDCl3  
 NS 16  
 DS 64  
 SWH 11001.101 Hz  
 FIDRES 2.685816 Hz  
 AQ 0.1862132 sec  
 RG 128  
 DW 45.450 usec  
 DE 6.00 usec  
 TE 268.5 K

F1 - Acquisition Parameters  
 ND0 1  
 TD 1024  
 SFO1 799.8107 MHz  
 FIDRES 10.743262 Hz  
 SW 13.755 ppm  
 FmODE undefined

F2 - Processing parameters  
 SI 2048  
 SF 799.8064136 MHz  
 WDW QSIINE  
 SSB 2  
 LB 0.00 Hz  
 GB 0  
 PC 1.40

F1 - Processing parameters  
 SI 1024  
 MC2 States  
 SF 799.8064136 MHz  
 WDW QSIINE  
 SSB 2  
 LB 0.00 Hz  
 GB 0

2D NMR plot parameters  
 CX2 15.00 cm  
 CX1 15.00 cm  
 F2PLO 11.007 ppm  
 F2LO 8803.10 Hz  
 F2PHI 5.499 ppm  
 F2HI 4398.36 Hz  
 F1PLO 11.000 ppm  
 F1LO 8797.87 Hz  
 F1PHI 5.500 ppm  
 F1HI 4398.94 Hz  
 F2PPMCM 0.36715 ppm/cm  
 F2HZCM 293.64917 Hz/cm  
 F1PPMCM 0.36667 ppm/cm  
 F1HZCM 293.26236 Hz/cm

S. Levin and J. S. Nowick

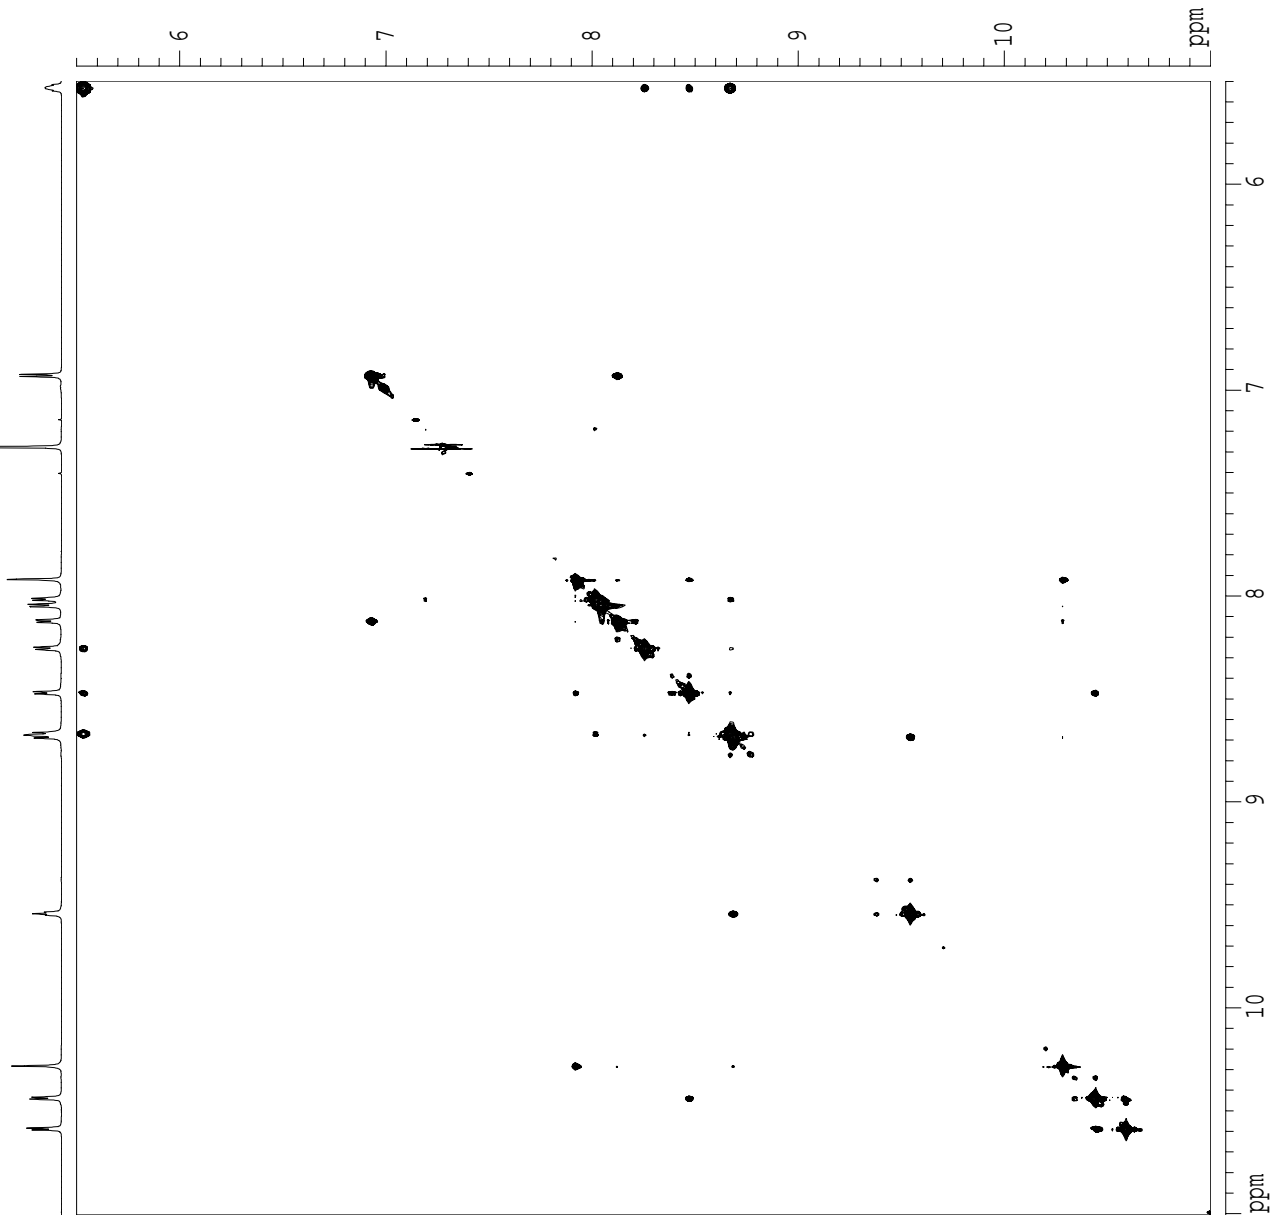

Supporting Information

S. Levin and J. S. Nowick

Current Data Parameters  
 USER slevin  
 NAME SL-7-229-800-H  
 EXENO 5  
 PROCNO 1

F2 - Acquisition Parameters

Date 20070131  
 Time\_ 0.00  
 INSTRUM varian  
 PROBD 40:5mmroadban  
 PULPROG noesyh2o\_pfg\_800\_pln  
 TD 4096  
 SOLVENT CDCl3  
 NS 16  
 DS 64  
 SWH 11001.101 Hz  
 FIDRES 2.685816 Hz  
 AQ 0.1862132 sec  
 RG 128  
 DW 45.450 usec  
 DE 6.00 usec  
 TE 268.5 K

F1 - Acquisition Parameters

ND0 1  
 TD 1024  
 SF01 799.8107 MHz  
 FIDRES 10.743262 Hz  
 SW 13.755 ppm  
 FnmODE undefined

F2 - Processing parameters

SI 2048  
 SF 799.8064136 MHz  
 WDW QSINE  
 SSB 2  
 LB 0.00 Hz  
 GB 0  
 PC 1.40

F1 - Processing parameters

SI 1024  
 MC2 States  
 SF 799.8064136 MHz  
 WDW QSINE  
 SSB 2  
 LB 0.00 Hz  
 GB 0

2D NMR plot parameters

CX2 15.00 cm  
 CX1 15.00 cm  
 F2FLO 11.000 ppm  
 F2LO 8797.87 Hz  
 F2PHI 5.500 ppm  
 F2HI 4398.94 Hz  
 F1FLO 5.513 ppm  
 F1LO 4409.10 Hz  
 F1PHI -0.102 ppm  
 F1HI -81.58 Hz  
 F2PPMCM 0.36667 ppm/cm  
 F2HZCM 293.26236 Hz/cm  
 F1PPMCM 0.37431 ppm/cm  
 F1HZCM 299.37891 Hz/cm

800 MHz NOESY Spectrum of **1b** in CDCl<sub>3</sub>  
 400 ms mixing time  
 268 K (-5 °C), 6 mM

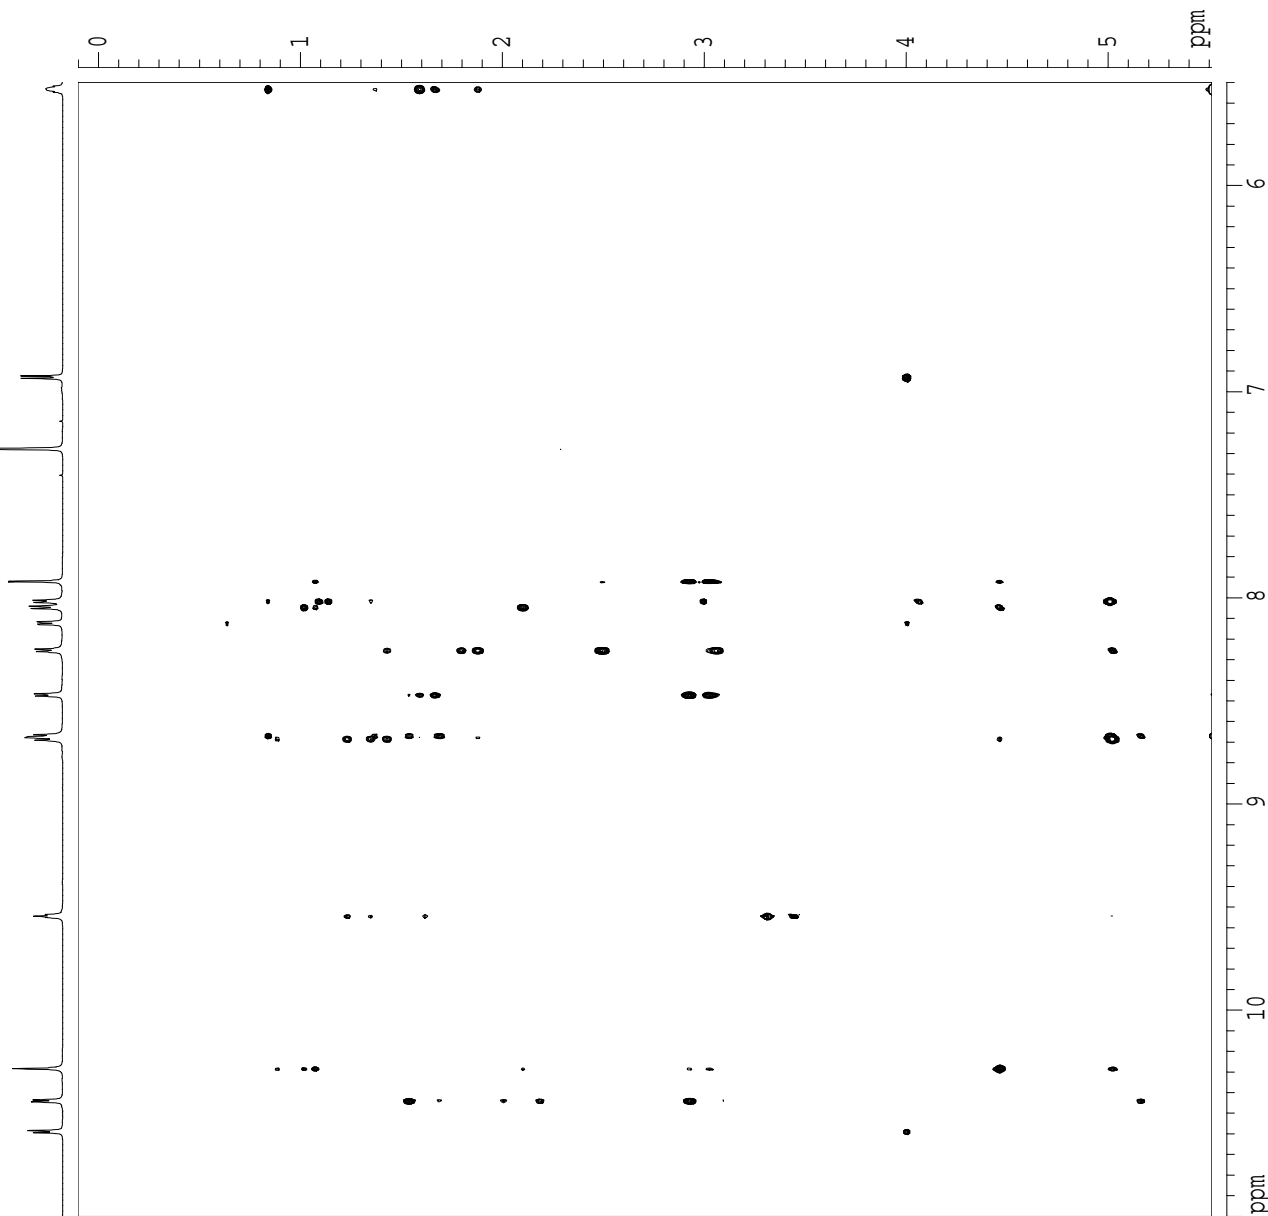

Current Data Parameters  
 USER slevin  
 NAME SL-7-229-800-H  
 EXPNO 5  
 PROCNO 1

F2 - Acquisition Parameters

Date 20070131  
 Time 0.00  
 INSTRUM varian  
 PROBHD 40:5mmbroadban  
 PULPROG noesyh2\_pfg\_800\_pln  
 TD 4096

SOLVENT CDCl3  
 NS 16  
 DS 64

SWH 11001.101 Hz  
 FIDRES 2.685816 Hz  
 AQ 0.1862132 sec

RG 128  
 DW 45.450 usec  
 DE 6.00 usec  
 TE 268.5 K

F1 - Acquisition Parameters

ND0 1  
 TD 1024  
 SF01 799.8107 MHz  
 FIDRES 10.743262 Hz  
 SW 13.755 ppm  
 FhMODE undefined

F2 - Processing parameters

SI 2048  
 SF 799.8064136 MHz  
 WDW QSINE  
 SSB 2  
 LB 0.00 Hz  
 GB 0  
 PC 1.40

F1 - Processing parameters

SI 1024  
 MC2 States  
 SF 799.8064136 MHz  
 WDW QSINE  
 SSB 2  
 LB 0.00 Hz  
 GB 0

2D NMR plot parameters

CX2 15.00 cm  
 CX1 15.00 cm  
 F2PFO 5.500 ppm  
 F2LO 4398.94 Hz  
 F2PHI -0.100 ppm  
 F2HI -79.98 Hz  
 F1PFO 5.500 ppm  
 F1LO 4398.94 Hz  
 F1PHI -0.100 ppm  
 F1HI -79.98 Hz  
 F2PPMCM 0.37333 ppm/cm  
 F2HZCM 298.59439 Hz/cm  
 F1PPMCM 0.37333 ppm/cm  
 F1HZCM 298.59439 Hz/cm

800 MHz NOESY Spectrum of **1b** in CDCl<sub>3</sub>  
 400 ms mixing time  
 268 K (-5 °C), 6 mM

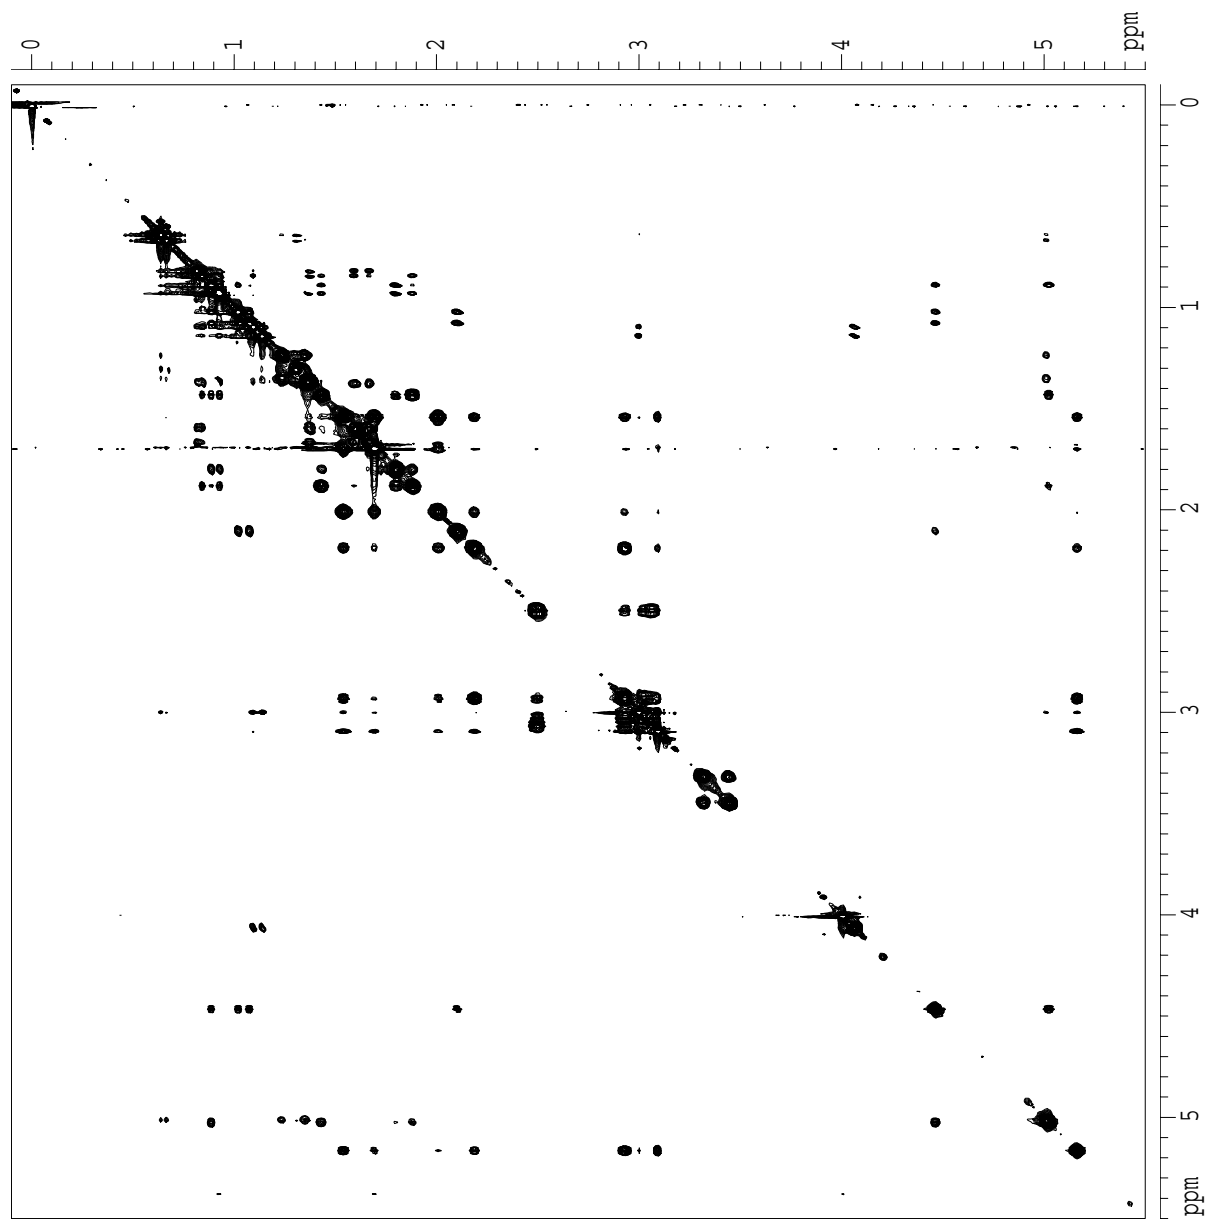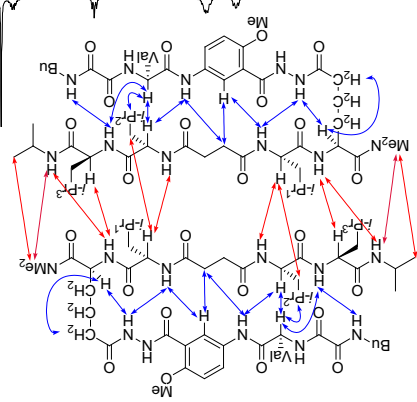

Supporting Information

Current Data Parameters  
 USER slevin  
 NAME SL-7-229-800-H  
 EXPNO 5  
 PROCNO 1

F2 - Acquisition Parameters

Date\_ 20070131  
 Time\_ 0.00  
 INSTRUM varian  
 PROBHD 40:5mm broadband  
 PULPROG noesyhzo\_prg\_800.pln  
 TD 4096  
 SOLVENT CDCl3  
 NS 16  
 DS 64  
 SWH 11001.101 Hz  
 FIDRES 2.685816 Hz  
 AQ 0.1862132 sec  
 RG 128  
 DW 45.450 usec  
 DE 6.00 usec  
 TE 268.5 K

F1 - Acquisition parameters

ND0 1  
 TD 1024  
 SFO1 799.8107 MHz  
 FIDRES 10.743262 Hz  
 SW 13.755 ppm  
 FMODE undefined

F2 - Processing parameters

SI 2048  
 SF 799.8064136 MHz  
 WDW QSINE  
 SSB 2  
 LB 0.00 Hz  
 GB 0  
 PC 1.40

F1 - Processing parameters

SI 1024  
 MC2 States  
 SF 799.8064136 MHz  
 WDW QSINE  
 SSB 2  
 LB 0.00 Hz  
 GB 0

2D NMR plot parameters

CX2 15.00 cm  
 CX1 15.00 cm  
 F2PLO 2.250 ppm  
 F2LO 1799.56 Hz  
 F2PHI 0.500 ppm  
 F2HI 399.90 Hz  
 F1PLO 2.250 ppm  
 F1LO 1799.56 Hz  
 F1PHI 0.500 ppm  
 F1HI 399.90 Hz  
 F2PPMCM 0.11667 ppm/cm  
 F2HZCM 93.31075 Hz/cm  
 F1PPMCM 0.11667 ppm/cm  
 F1HZCM 93.31075 Hz/cm

S. Levin and J. Nowick

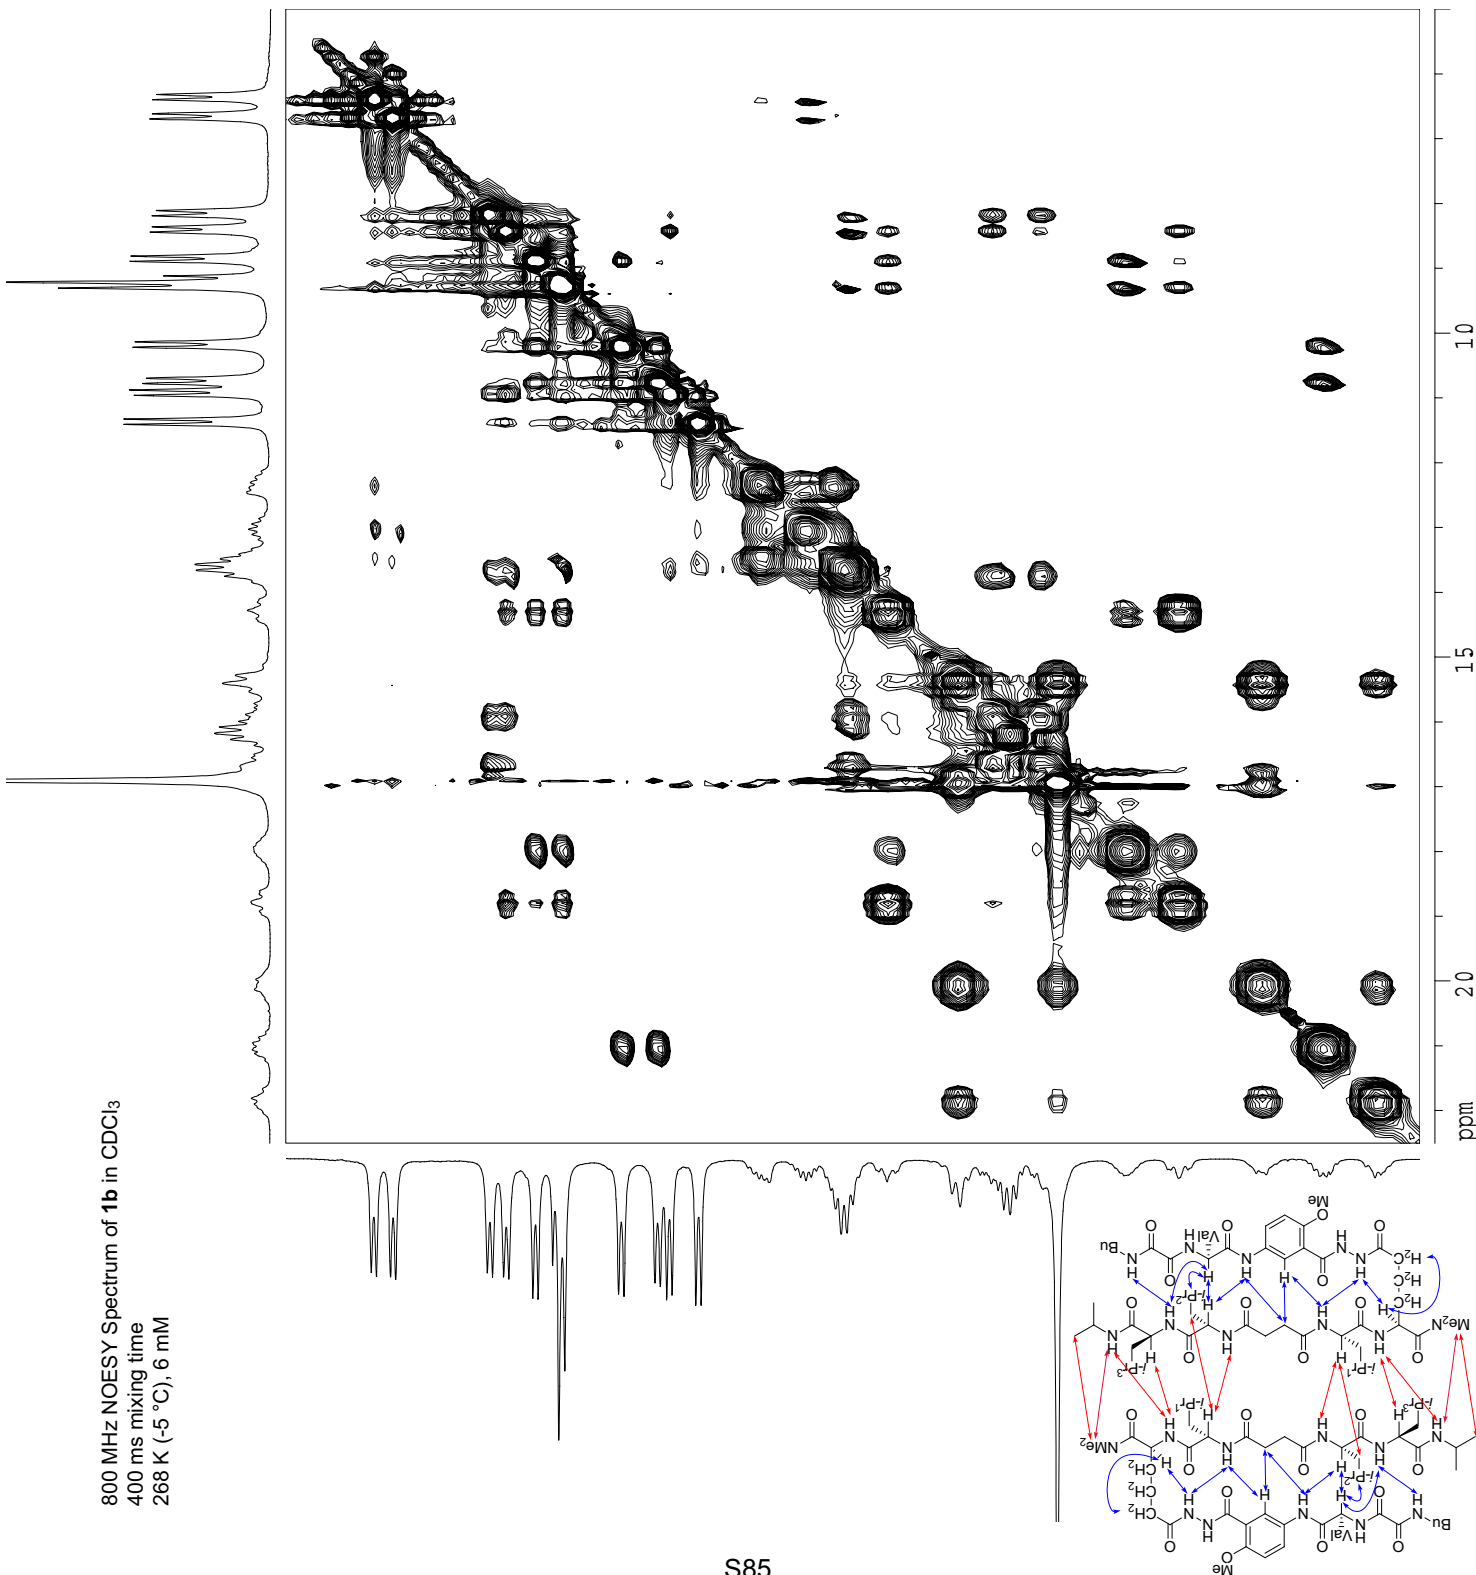

800 MHz NOESY Spectrum of **1b** in CDCl<sub>3</sub>  
 400 ms mixing time  
 268 K (-5 °C), 6 mM

800 MHz NOESY Spectrum of **1b** in CDCl<sub>3</sub>  
 400 ms mixing time  
 268 K (-5 °C), 6 mM

Supporting Information

Current Data Parameters  
 USER sievin  
 NAME SL-7-229-800-H  
 EXPNO 5  
 PROCNO 1

F2 - Acquisition Parameters

Date\_ 20070131  
 Time\_ 0.00  
 INSTRUM varian  
 PROBHD 40:5mm broadband  
 PULPROG noesyh2o\_pfg\_800\_pln  
 TD 4096  
 SOLVENT CDCl<sub>3</sub>  
 NS 16  
 DS 64  
 SWH 11001.101 Hz  
 FIDRES 2.685816 Hz  
 AQ 0.1862132 sec  
 RG 128  
 DW 45.450 usec  
 DE 6.00 usec  
 TE 268.5 K

F1 - Acquisition Parameters

ND0 1  
 TD 1024  
 SFO1 799.8107 MHz  
 FIDRES 10.743262 Hz  
 SW 13.755 ppm  
 FwMODE undefined

F2 - Processing Parameters

SI 2048  
 SF 799.8064136 MHz  
 WDW QSINE  
 SSB 2  
 LB 0.00 Hz  
 GB 0  
 PC 1.40

F1 - Processing Parameters

SI 1024  
 MC2 States  
 SF 799.8064136 MHz  
 WDW QSINE  
 SSB 2  
 LB 0.00 Hz  
 GB 0

2D NMR plot parameters

CX2 15.00 cm  
 CX1 15.00 cm  
 F2PLO 10.591 ppm  
 F2LO 8471.06 Hz  
 F2PHI 7.764 ppm  
 F2HI 6209.60 Hz  
 F1PLO 3.586 ppm  
 F1LO 2868.45 Hz  
 F1PHI 0.578 ppm  
 F1HI 461.96 Hz  
 F2PPMCM 0.18850 ppm/cm  
 F2HZCM 150.76378 Hz/cm  
 F1PPMCM 0.20059 ppm/cm  
 F1HZCM 160.43269 Hz/cm

S. Levin and J. S. Nowick

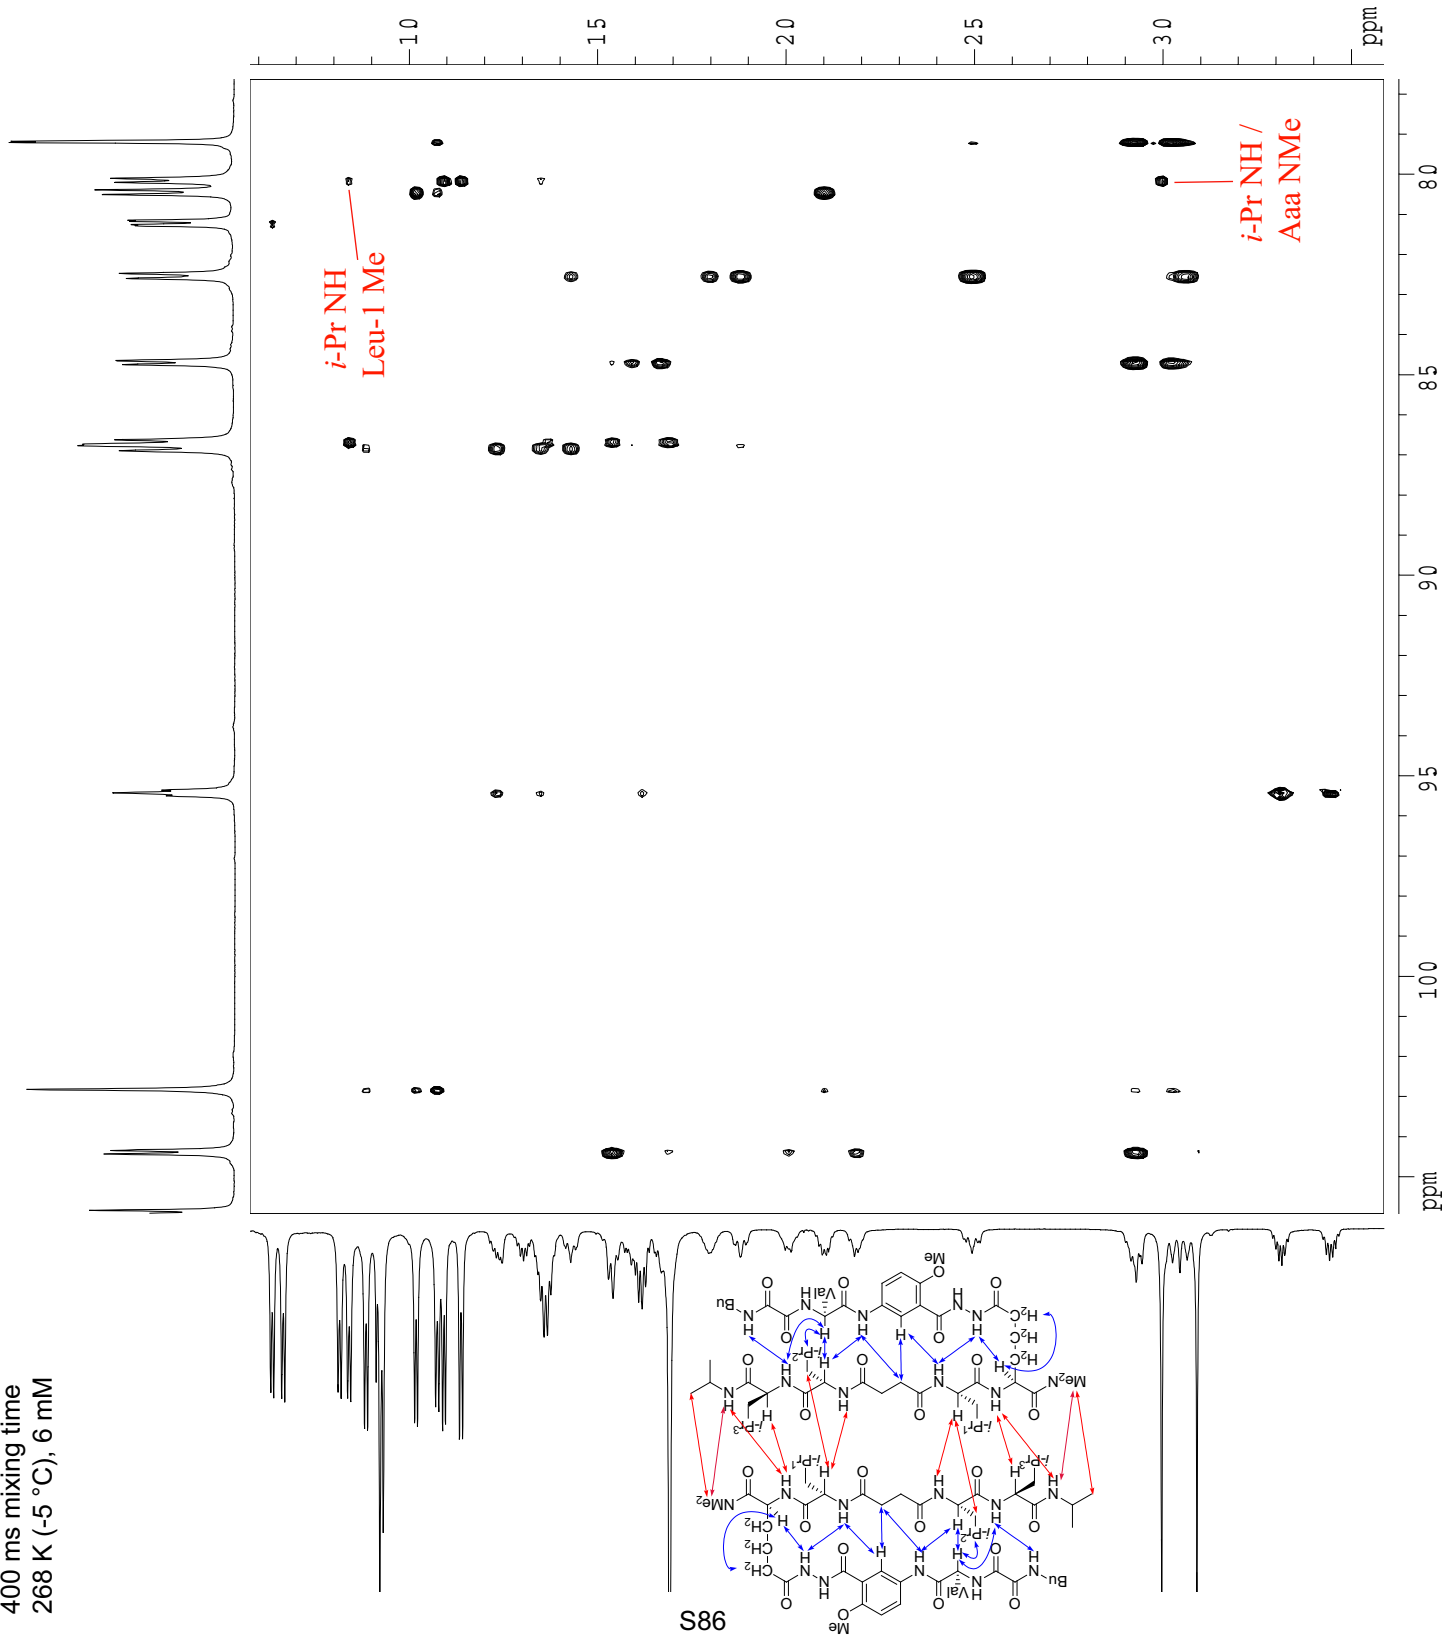

Supporting Information

800 MHz NOESY Spectrum of **1b** in CDCl<sub>3</sub>  
 400 ms mixing time  
 268 K (-5 °C), 6 mM

Current Data Parameters  
 USER slevin  
 NAME SL-7-229-800-H  
 EXPNO 5  
 PROCNO 1

F2 - Acquisition Parameters  
 Date\_ 20070131  
 Time 0.00  
 INSTRUM varian  
 PROBHD 40:5mmroadban  
 PULPROG noesyh2o\_pfg\_800.pln  
 TD 4096

SOLVENT CDCl<sub>3</sub>  
 NS 16  
 DS 64  
 SWH 11001.101 Hz  
 FIDRES 2.685816 Hz  
 AQ 0.1862132 sec  
 RG 128  
 DW 45.450 usec  
 DE 6.00 usec  
 TE 268.5 K

F1 - Acquisition Parameters  
 ND0 1  
 TD 1024  
 SF01 799.8107 MHz  
 FIDRES 10.743262 Hz  
 SW 13.755 ppm  
 F1MODE undefined

F2 - Processing parameters  
 SI 2048  
 SF 799.8064136 MHz  
 WDM QSINE  
 SSB 2  
 LB 0.00 Hz  
 GB 0  
 PC 1.40

F1 - Processing parameters  
 SI 1024  
 MC2 States  
 SF 799.8064136 MHz  
 WDM QSINE  
 SSB 2  
 LB 0.00 Hz  
 GB 0

2D NMR plot parameters  
 CX2 15.00 cm  
 CX1 15.00 cm  
 F2PLO 10.591 ppm  
 F2LO 8471.06 Hz  
 F2PHI 7.643 ppm  
 F2HI 6112.91 Hz  
 F1PLO 8.892 ppm  
 F1LO 7112.04 Hz  
 F1PHI 6.797 ppm  
 F1HI 5436.09 Hz  
 F2PPMCM 0.19656 ppm/cm  
 F2HZCM 157.20972 Hz/cm  
 F1PPMCM 0.13970 ppm/cm  
 F1HZCM 111.72990 Hz/cm

S. Levin and J. S. Nowick

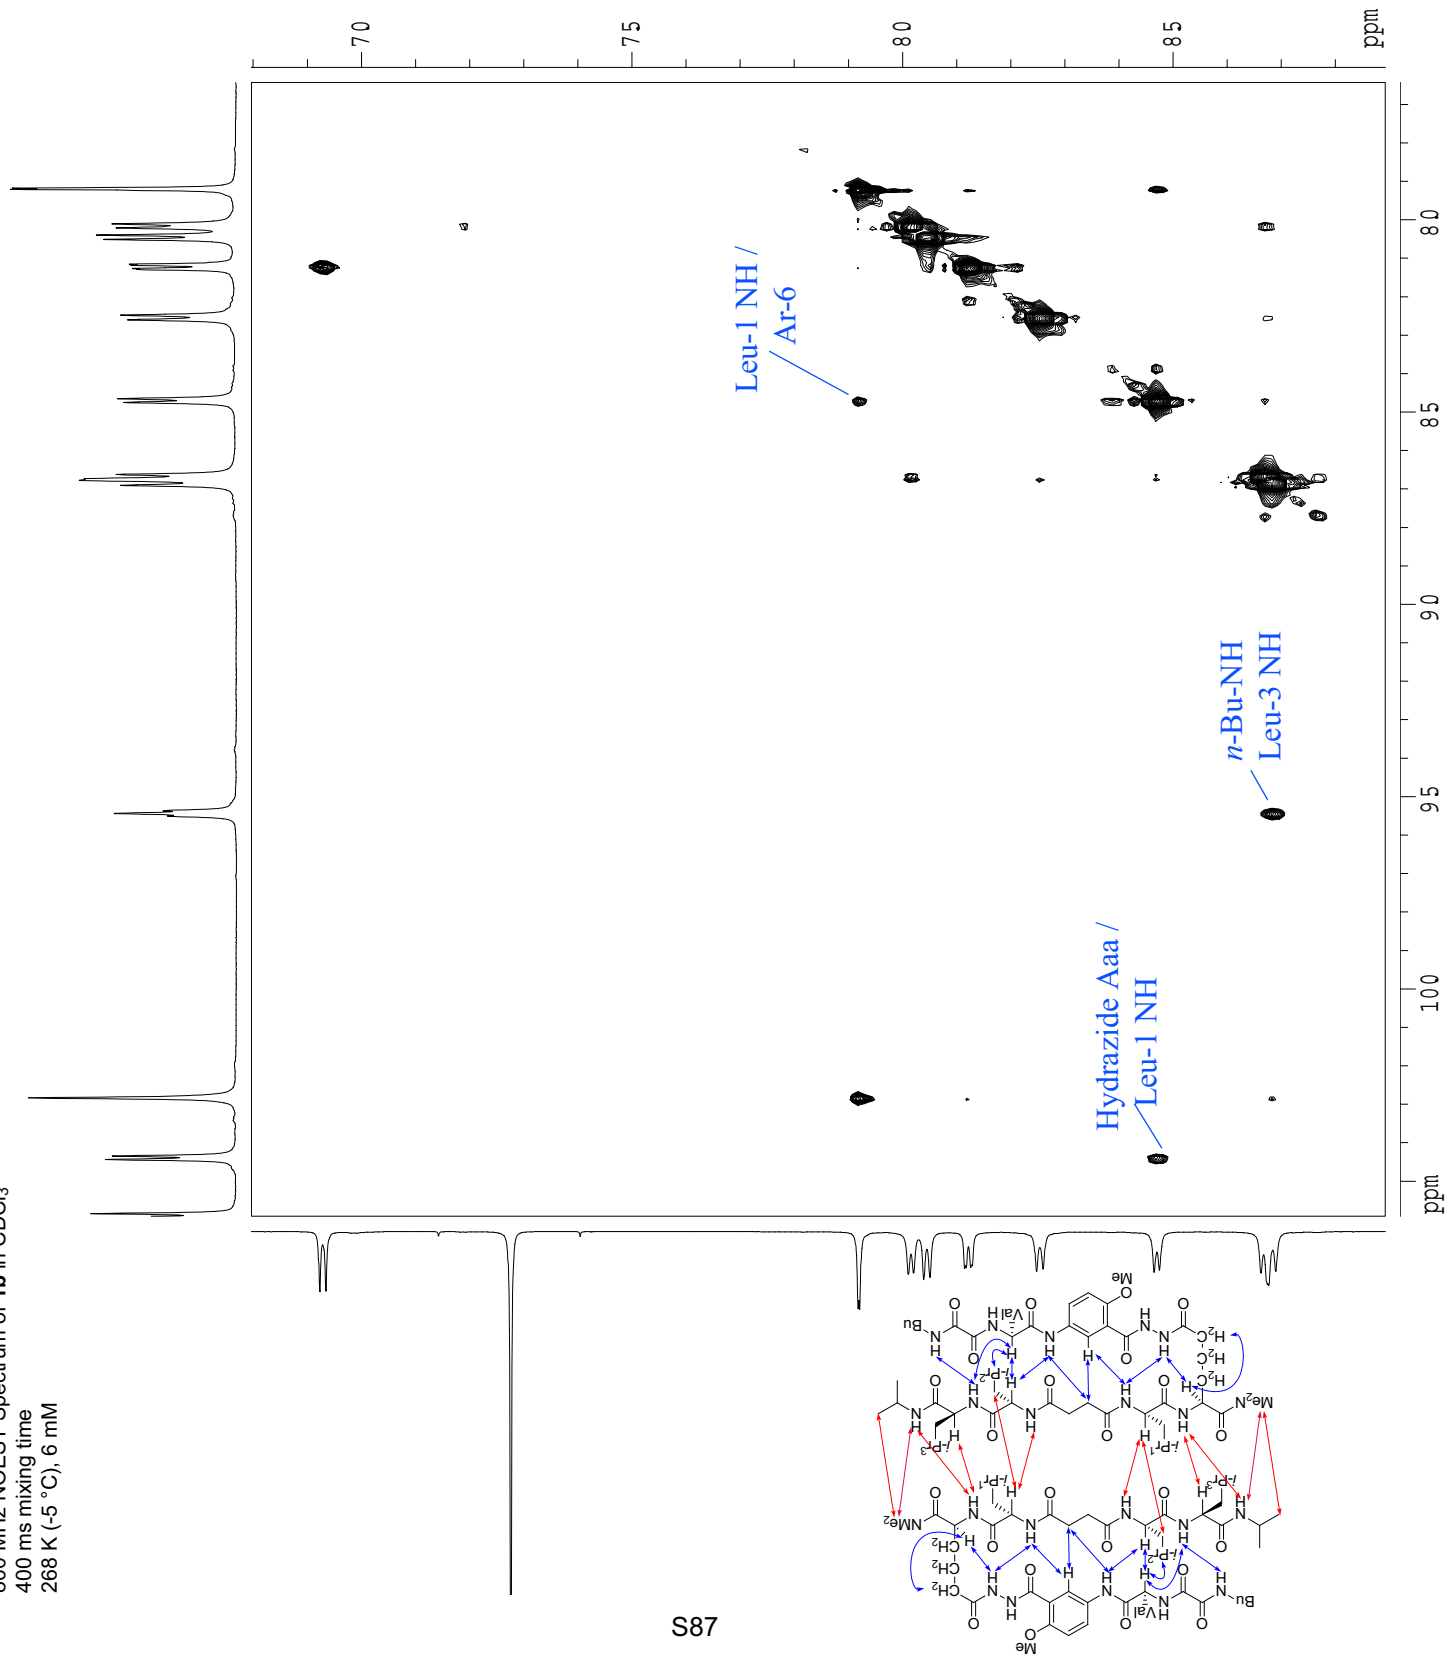

800 MHz NOESY Spectrum of **1b** in CDCl<sub>3</sub>  
 400 ms mixing time  
 268 K (-5 °C), 6 mM

Supporting Information

Current Data Parameters  
 USER sleivin  
 NAME SL-7-229-800-H  
 EXPNO 5  
 PROCNO 1

F2 - Acquisition Parameters  
 Date\_ 20070131  
 Time 0.00  
 INSTRUM varian  
 PROBHD 40:5mmbroacdban  
 PULPROG noesyh2o\_pfg\_800\_pln  
 TD 4096  
 SOLVENT CDCl<sub>3</sub>  
 NS 16  
 DS 64  
 SWH 11001.101 Hz  
 FIDRES 2.685816 Hz  
 AQ 0.1862132 sec  
 RG 128  
 DW 45.450 usec  
 DE 6.00 usec  
 TE 268.5 K

F1 - Acquisition parameters  
 ND0 1  
 TD 1024  
 SF01 799.8107 MHz  
 FIDRES 10.743262 Hz  
 SW 13.755 ppm  
 FMODE undefined

F2 - Processing parameters  
 SI 2048  
 SF 799.8064136 MHz  
 WDW QSI  
 SSB 2  
 LB 0.00 Hz  
 GB 0  
 PC 1.40

F1 - Processing parameters  
 SI 1024  
 MC2 States  
 SF 799.8064136 MHz  
 WDW QSI  
 SSB 2  
 LB 0.00 Hz  
 GB 0

2D NMR plot parameters  
 CX2 15.00 cm  
 CX1 15.00 cm  
 F2PLO 10.665 ppm  
 F2LO 8530.15 Hz  
 F2PHI 7.811 ppm  
 F2HI 6247.20 Hz  
 F1PLO 5.628 ppm  
 F1LO 4501.42 Hz  
 F1PHI 2.767 ppm  
 F1HI 2213.11 Hz  
 F2PPMCM 0.19029 ppm/cm  
 F2HZCM 152.19621 Hz/cm  
 F1PPMCM 0.19074 ppm/cm  
 F1HZCM 152.55431 Hz/cm

S. Levin and J. S. Nowick

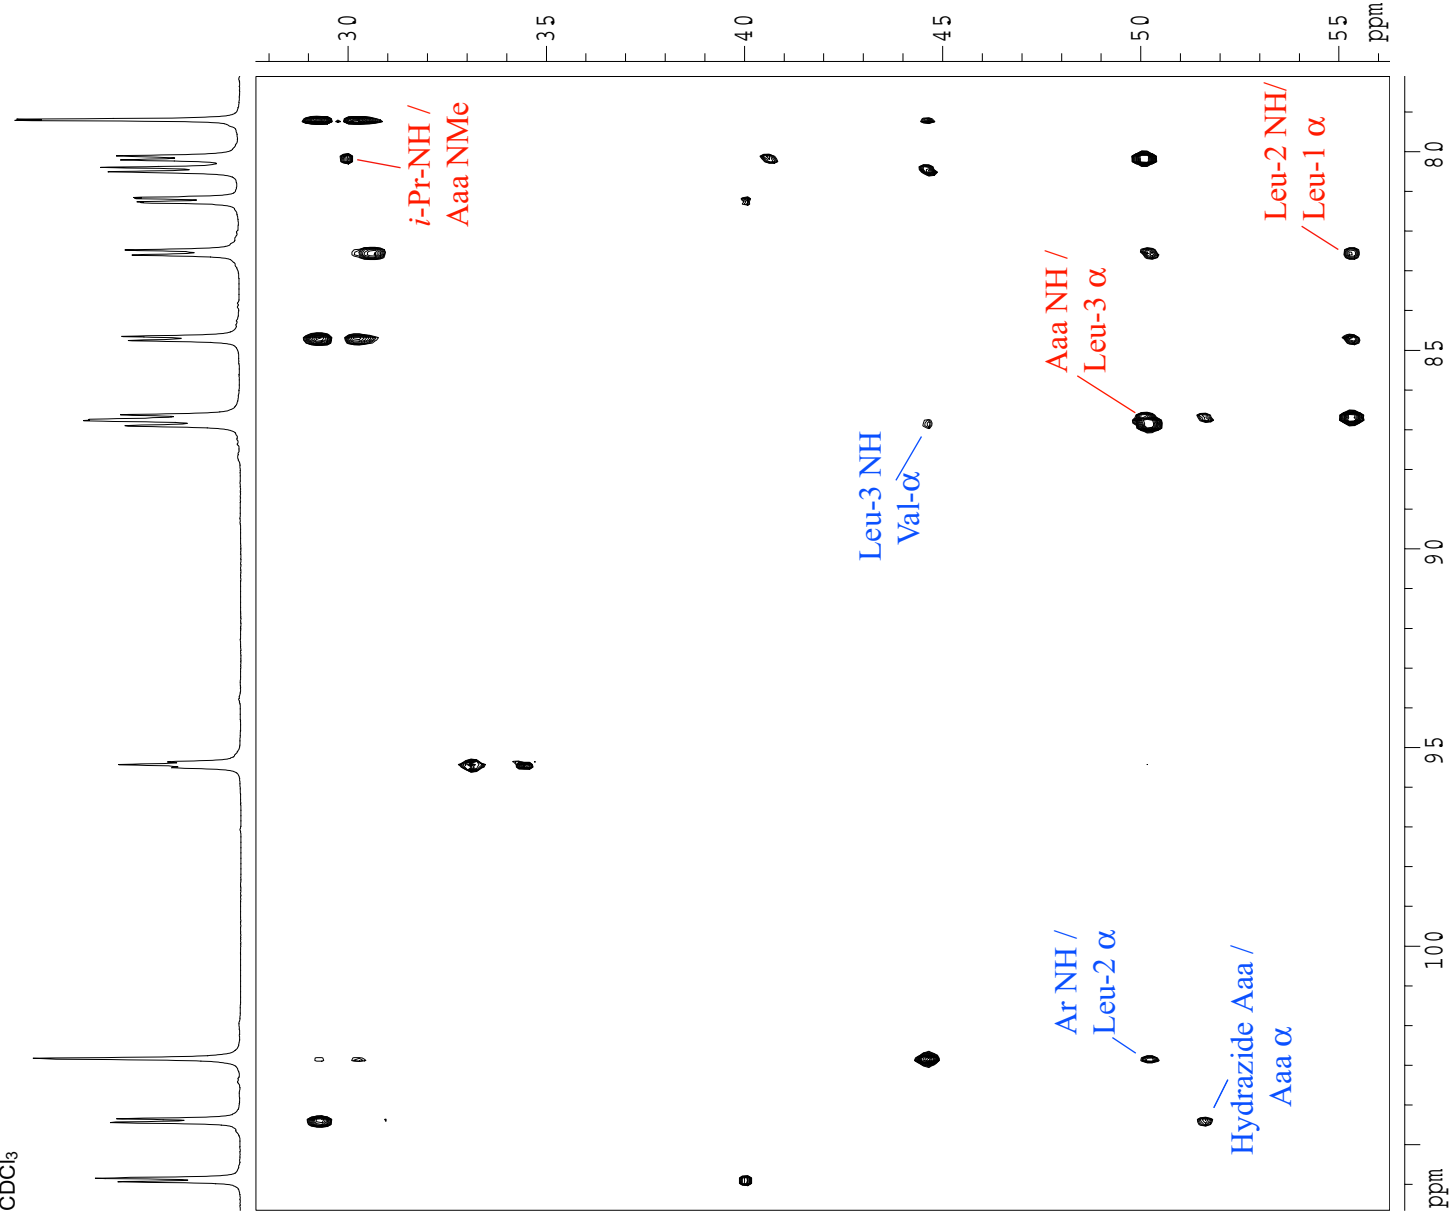



Supporting Information

Current Data Parameters  
 USER slevin  
 NAME SL-7-229-800-H  
 EXPNO 5  
 PROCNO 1

F2 - Acquisition Parameters

Date 20070131  
 Time 0.00  
 INSTRUM varian  
 PROBHD 40:5mm broadband  
 PULPROG noesyh2o\_pfg\_800\_pln  
 TD 4096  
 SOLVENT CDCl3  
 NS 16  
 DS 64  
 SWH 11001.101 Hz  
 FIDRES 2.685816 Hz  
 AQC 0.1862132 sec  
 RG 128  
 DW 45.450 usec  
 DE 6.00 usec  
 TE 268.5 K

F1 - Acquisition parameters

ND0 1  
 TD 1024  
 SF01 799.8107 MHz  
 FIDRES 10.743262 Hz  
 SW 13.755 ppm  
 FwMODE undefined

F2 - Processing parameters

SI 2048  
 SF 799.8064136 MHz  
 WDW QSI  
 SSB 2  
 LB 0.00 Hz  
 GB 0  
 PC 1.40

F1 - Processing parameters

SI 1024  
 MC2 States  
 SF 799.8064136 MHz  
 WDW QSI  
 SSB 2  
 LB 0.00 Hz  
 GB 0

2D NMR plot parameters

CX2 15.00 cm  
 CX1 15.00 cm  
 F2PLO 5.621 ppm  
 F2LO 4496.05 Hz  
 F2PHI 2.881 ppm  
 F2HI 2304.43 Hz  
 F1PLO 3.157 ppm  
 F1LO 2524.66 Hz  
 F1PHI 0.591 ppm  
 F1HI 472.70 Hz  
 F2PPMCM 0.18268 ppm/cm  
 F2HZCM 146.10835 Hz/cm  
 F1PPMCM 0.17104 ppm/cm  
 F1HZCM 136.79753 Hz/cm

800 MHz NOESY Spectrum of **1b** in CDCl<sub>3</sub>  
 400 ms mixing time  
 268 K (-5 °C), 6 mM

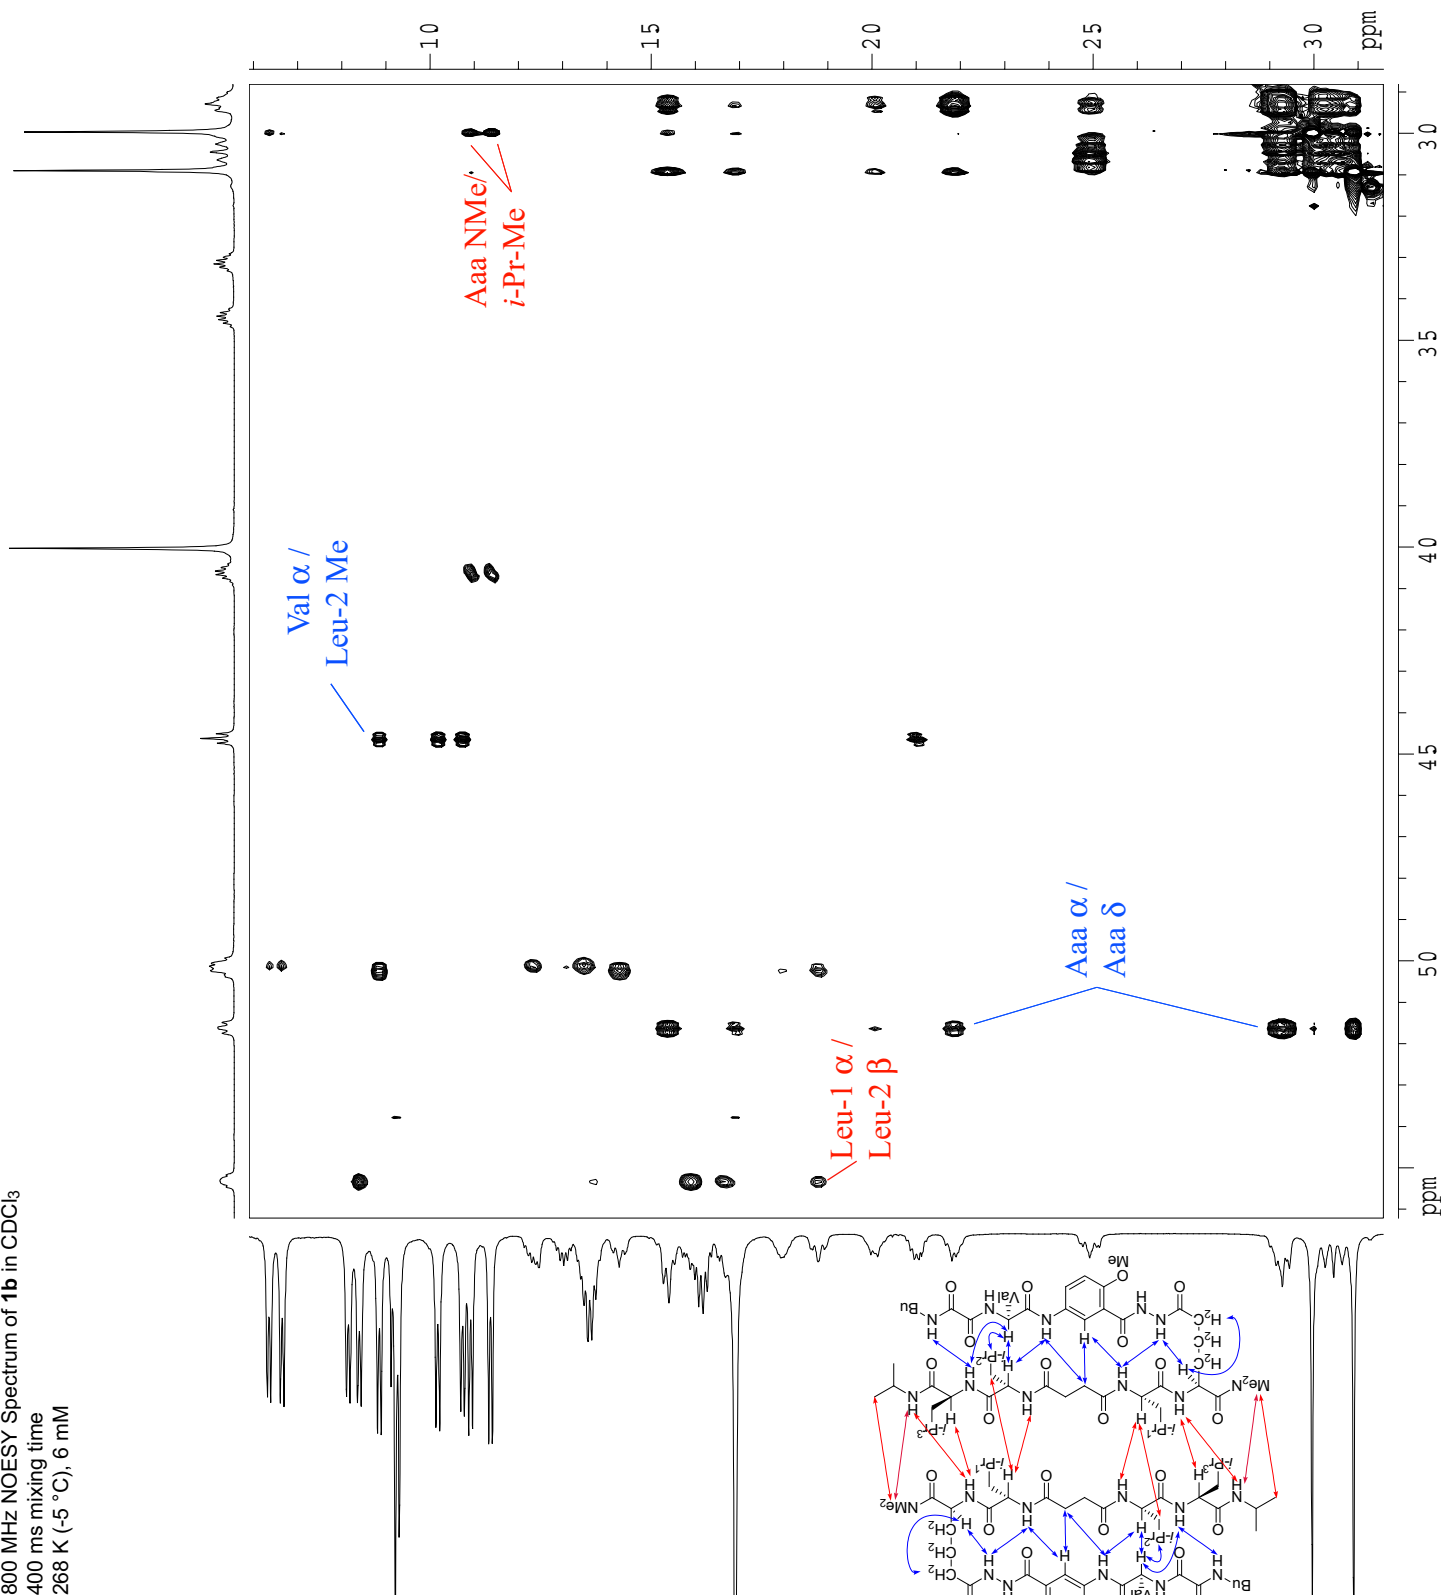

Supporting Information

800 MHz NOESY Spectrum of **1b** in CDCl<sub>3</sub>  
 400 ms mixing time  
 268 K (-5 °C), 6 mM

Current Data Parameters  
 USER slewin  
 NAME SL-7-229-800-H  
 EXPNO 5  
 PROCNO 1

F2 - Acquisition Parameters

Date\_ 20070131  
 Time\_ 0.00  
 INSTRUM varian  
 PROBHD 40:5mm broadband  
 PULPROG noesyh2o\_pig\_800\_pln  
 TD 4096

SOLVENT CDCl<sub>3</sub>

NS 16  
 DS 64  
 SWH 11001.101 Hz  
 FIDRES 2.685816 Hz  
 AQ 0.1862132 sec  
 RG 128  
 DW 45.450 usec  
 DE 6.00 usec  
 TE 288.5 K

F1 - Acquisition Parameters

ND0 1  
 TD 1024  
 SFO1 799.8107 MHz  
 FIDRES 10.743262 Hz  
 SW 13.755 ppm  
 FMODE undefined

F2 - Processing parameters

SI 2048  
 SF 799.8064136 MHz  
 WDW QSI  
 SSB 2  
 LB 0.00 Hz  
 GB 0  
 PC 1.40

F1 - Processing parameters

SI 1024  
 MC2 States  
 SF 799.8064136 MHz  
 WDW QSI  
 SSB 2  
 LB 0.00 Hz  
 GB 0

2D NMR plot parameters

CX2 15.00 cm  
 CX1 15.00 cm  
 F2PLO 5.098 ppm  
 F2LO 4077.06 Hz  
 F2PHI 4.392 ppm  
 F2HI 3513.04 Hz  
 F1PLO 5.104 ppm  
 F1LO 4082.44 Hz  
 F1PHI 4.392 ppm  
 F1HI 3513.04 Hz  
 F2PMCM 0.04701 ppm/cm  
 F2HZCM 37.60142 Hz/cm  
 F1PMCM 0.04746 ppm/cm  
 F1HZCM 37.95954 Hz/cm

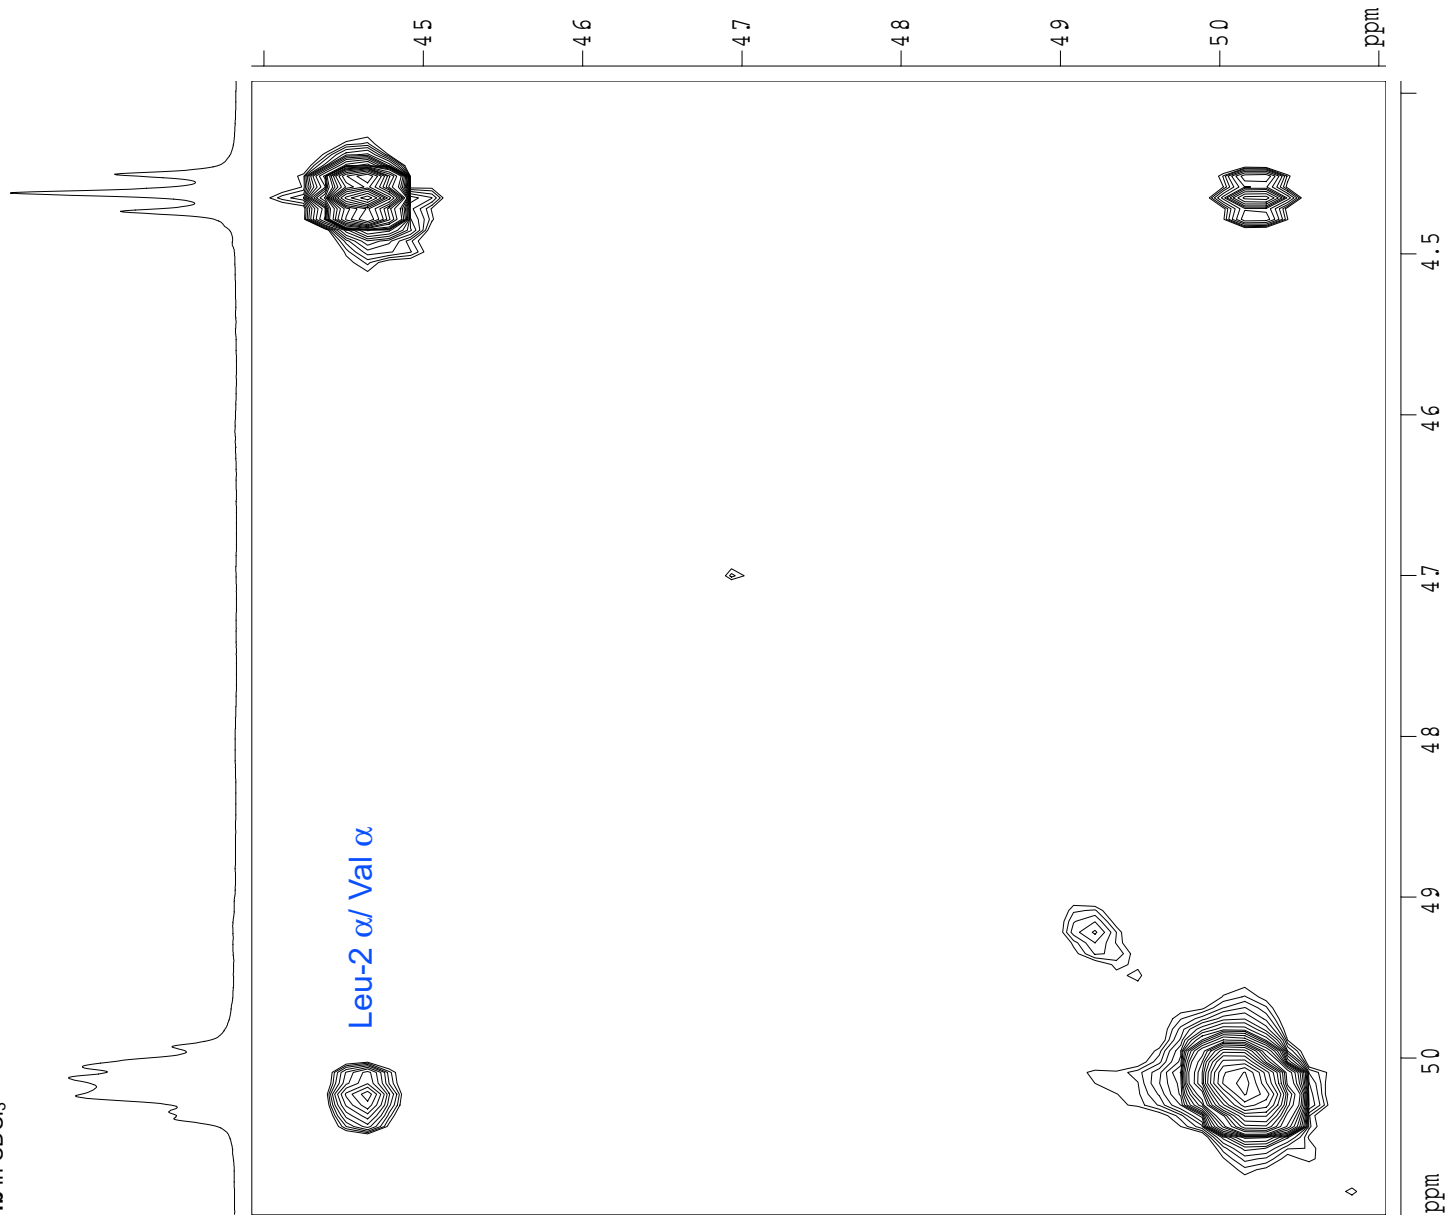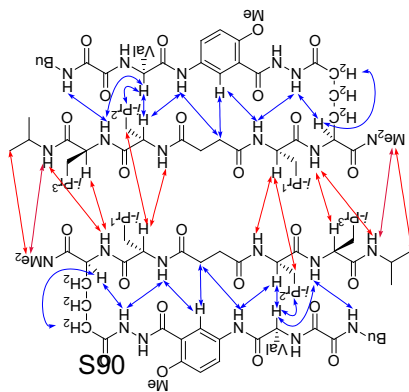

Supporting Information

Current Data Parameters

USER slevin  
 NAME SL-7-229-800-H  
 EXPNO 5  
 PROCNO 1

F2 - Acquisition Parameters  
 Date\_ 20070131  
 Time 0.00  
 INSTRUM varian  
 PROBHD 40:5mmrbroadban  
 PULPROG noesyh2o\_pfg\_800\_p1n  
 TD 4096

SOLVENT CDCl3  
 NS 16  
 DS 64  
 SWH 11001.101 Hz  
 FIDRES 2.685816 Hz  
 AQ 0.1862132 sec  
 RG 128  
 DW 45.450 usec  
 DE 6.00 usec  
 TE 268.5 K

F1 - Acquisition Parameters  
 ND0 1  
 TD 1024  
 SF01 799.8107 MHz  
 FIDRES 10.743262 Hz  
 SW 13.755 ppm  
 PRMODE undefined

F2 - Processing parameters  
 SI 2048  
 SF 799.8064136 MHz  
 WDW QSINE  
 SSB 2  
 LB 0.00 Hz  
 GB 0  
 PC 1.40

F1 - Processing parameters  
 SI 1024  
 MC2 States  
 SF 799.8064136 MHz  
 WDW QSINE  
 SSB 2  
 LB 0.00 Hz  
 GB 0

2D NMR plot parameters  
 CX2 15.00 cm  
 CX1 15.00 cm  
 F2PLO 5.500 ppm  
 F2LO 4398.94 Hz  
 F2PHI -0.100 ppm  
 F2HI -79.98 Hz  
 F1PLO 11.007 ppm  
 F1LO 8803.10 Hz  
 F1PHI 5.499 ppm  
 F1HI 4398.36 Hz  
 F2PPMCM 0.37333 ppm/cm  
 F2HZCM 298.59439 Hz/cm  
 F1PPMCM 0.36715 ppm/cm  
 F1HZCM 293.64917 Hz/cm

S. Levin and J. S. Nowick

800 MHz NOESY Spectrum of **1b** in CDCl<sub>3</sub>  
 400 ms mixing time  
 268 K (-5 °C), 6 mM

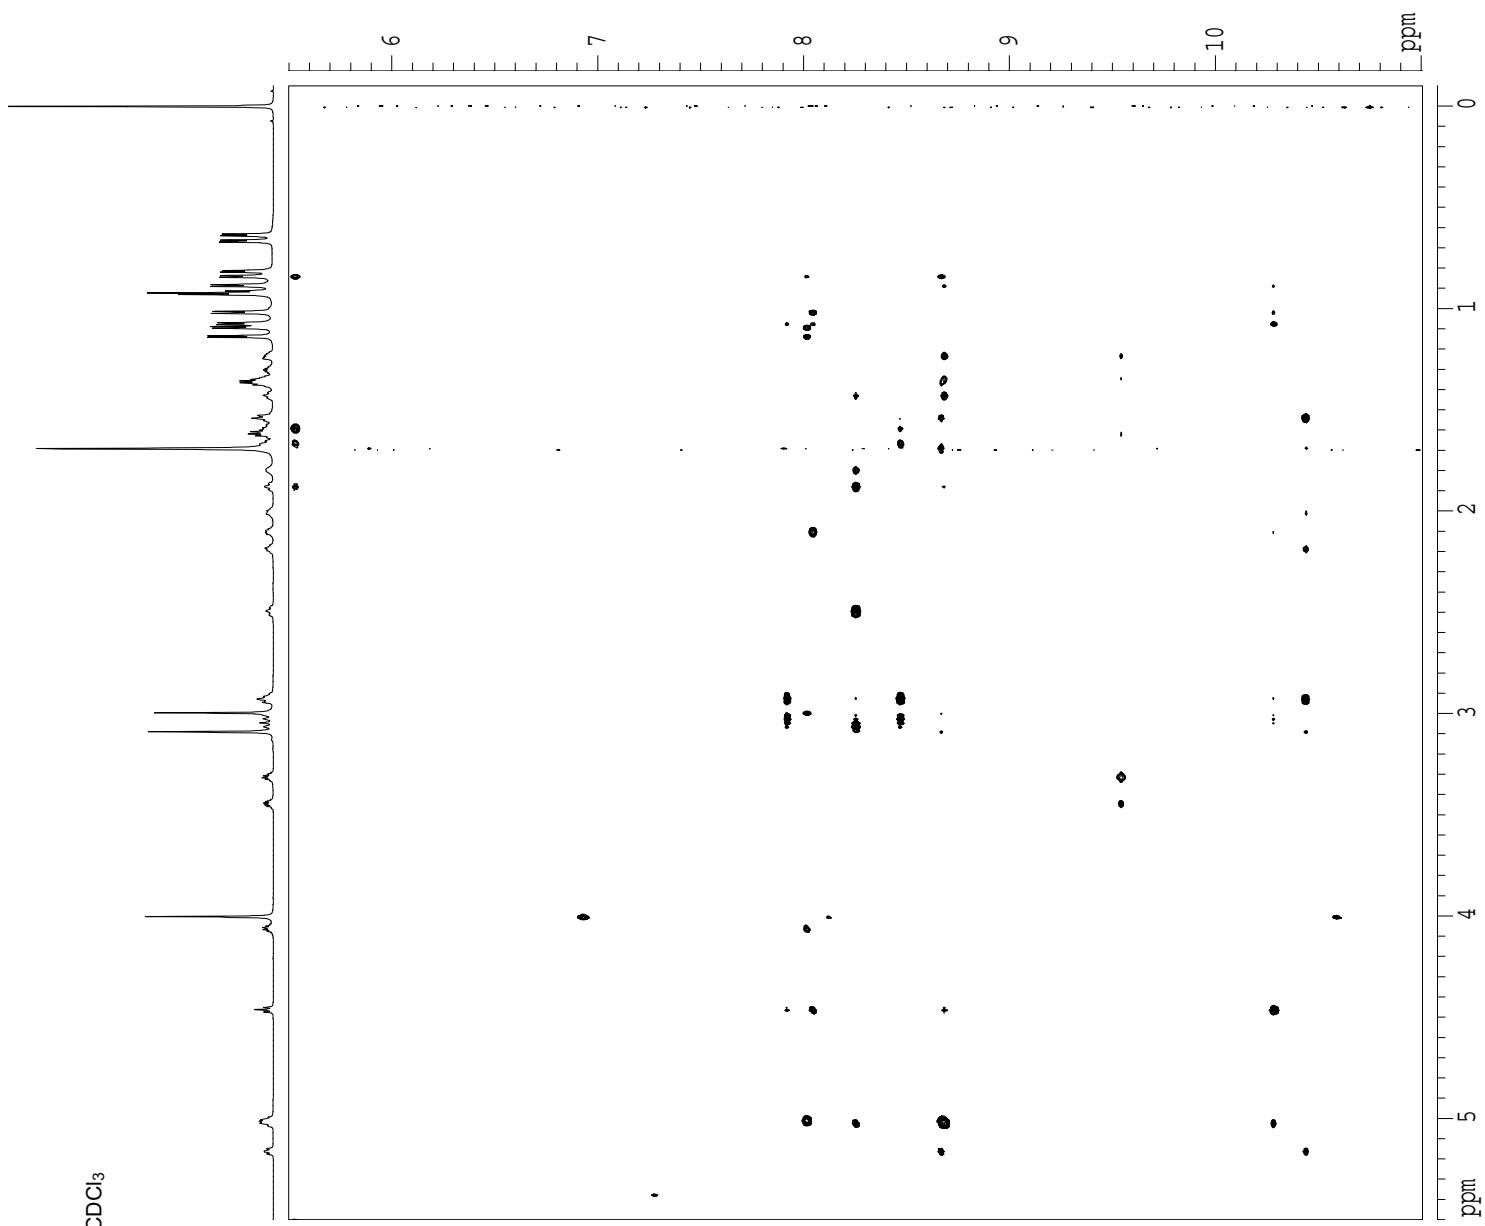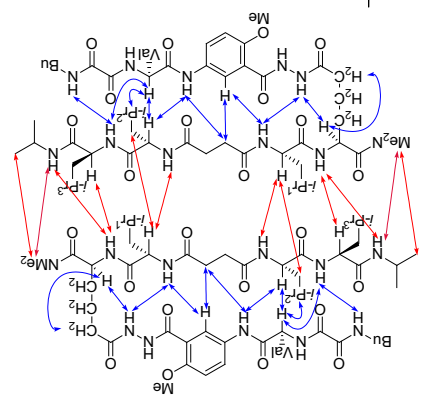

Spectroscopic DATA for the compound **1c**  
(8 mM, CDCl<sub>3</sub> 268K)

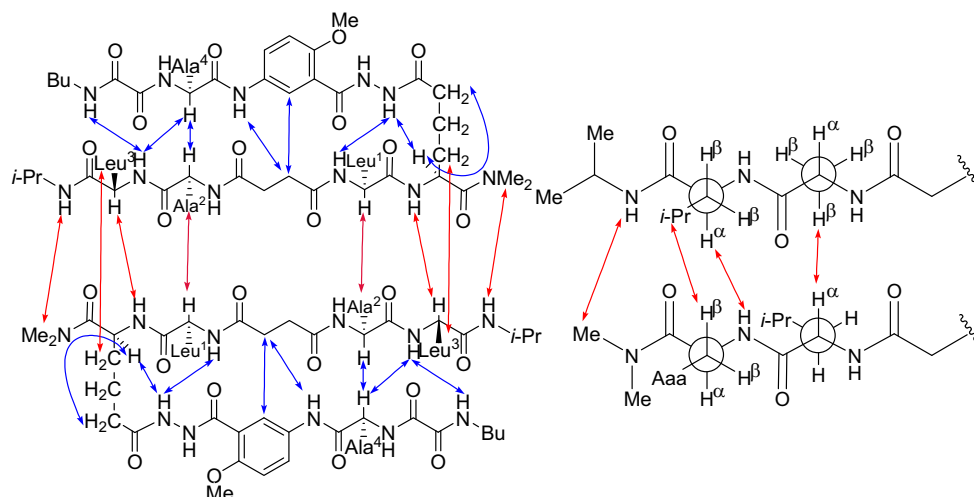

Key NOEs assigned as *intermolecular* are represented with red arrows  
Key NOEs assigned as *intramolecular* are represented with blue arrows

Key data for amino acids.

| Amino acid                        | H <sub>α</sub> Shift ppm | NH Shift ppm | <sup>3</sup> J <sub>NHα</sub> Hz |
|-----------------------------------|--------------------------|--------------|----------------------------------|
| Aaa                               | 5.17                     | 8.37         | broad                            |
| R <sub>1</sub> = Leu <sup>1</sup> | 5.53                     | 8.40         | broad                            |
| R <sub>2</sub> = Ala <sup>2</sup> | 5.06                     | 8.42         | broad                            |
| R <sub>3</sub> = Leu <sup>3</sup> | 5.01                     | 8.60         | 8.4                              |
| R <sub>4</sub> = Ala <sup>4</sup> | 4.68                     | 8.00         | broad                            |

Amino adipic acid (Aaa) δ proton resonances.

*pro*-R: 2.94 ppm, t, (*J* = 12.2 Hz)

*pro*-S: 2.19 ppm, td, (*J*<sub>1</sub> = 11.4 Hz; *J*<sub>2</sub> = 7.0 Hz)

anisotropy = 0.75ppm

Key data for other NH protons.

| Proton          | NH Shift ppm | <i>J</i> Hz |
|-----------------|--------------|-------------|
| Ar-NH           | 10.19        | -           |
| Hydrazide Ar    | 10.71        | broad       |
| Hydrazide Aaa   | 10.50        | broad       |
| Bu-NH           | 9.50         | broad       |
| <i>i</i> -Pr-NH | 8.00         | broad       |

ESI MS *m/z* for C<sub>47</sub>H<sub>78</sub>N<sub>11</sub>O<sub>12</sub> [M+H]<sup>+</sup> calcd 988.58, found 988.45.

800 MHz <sup>1</sup>H NMR Spectrum of **1c** in CDCl<sub>3</sub>  
268 K (-5 °C), 8 mM

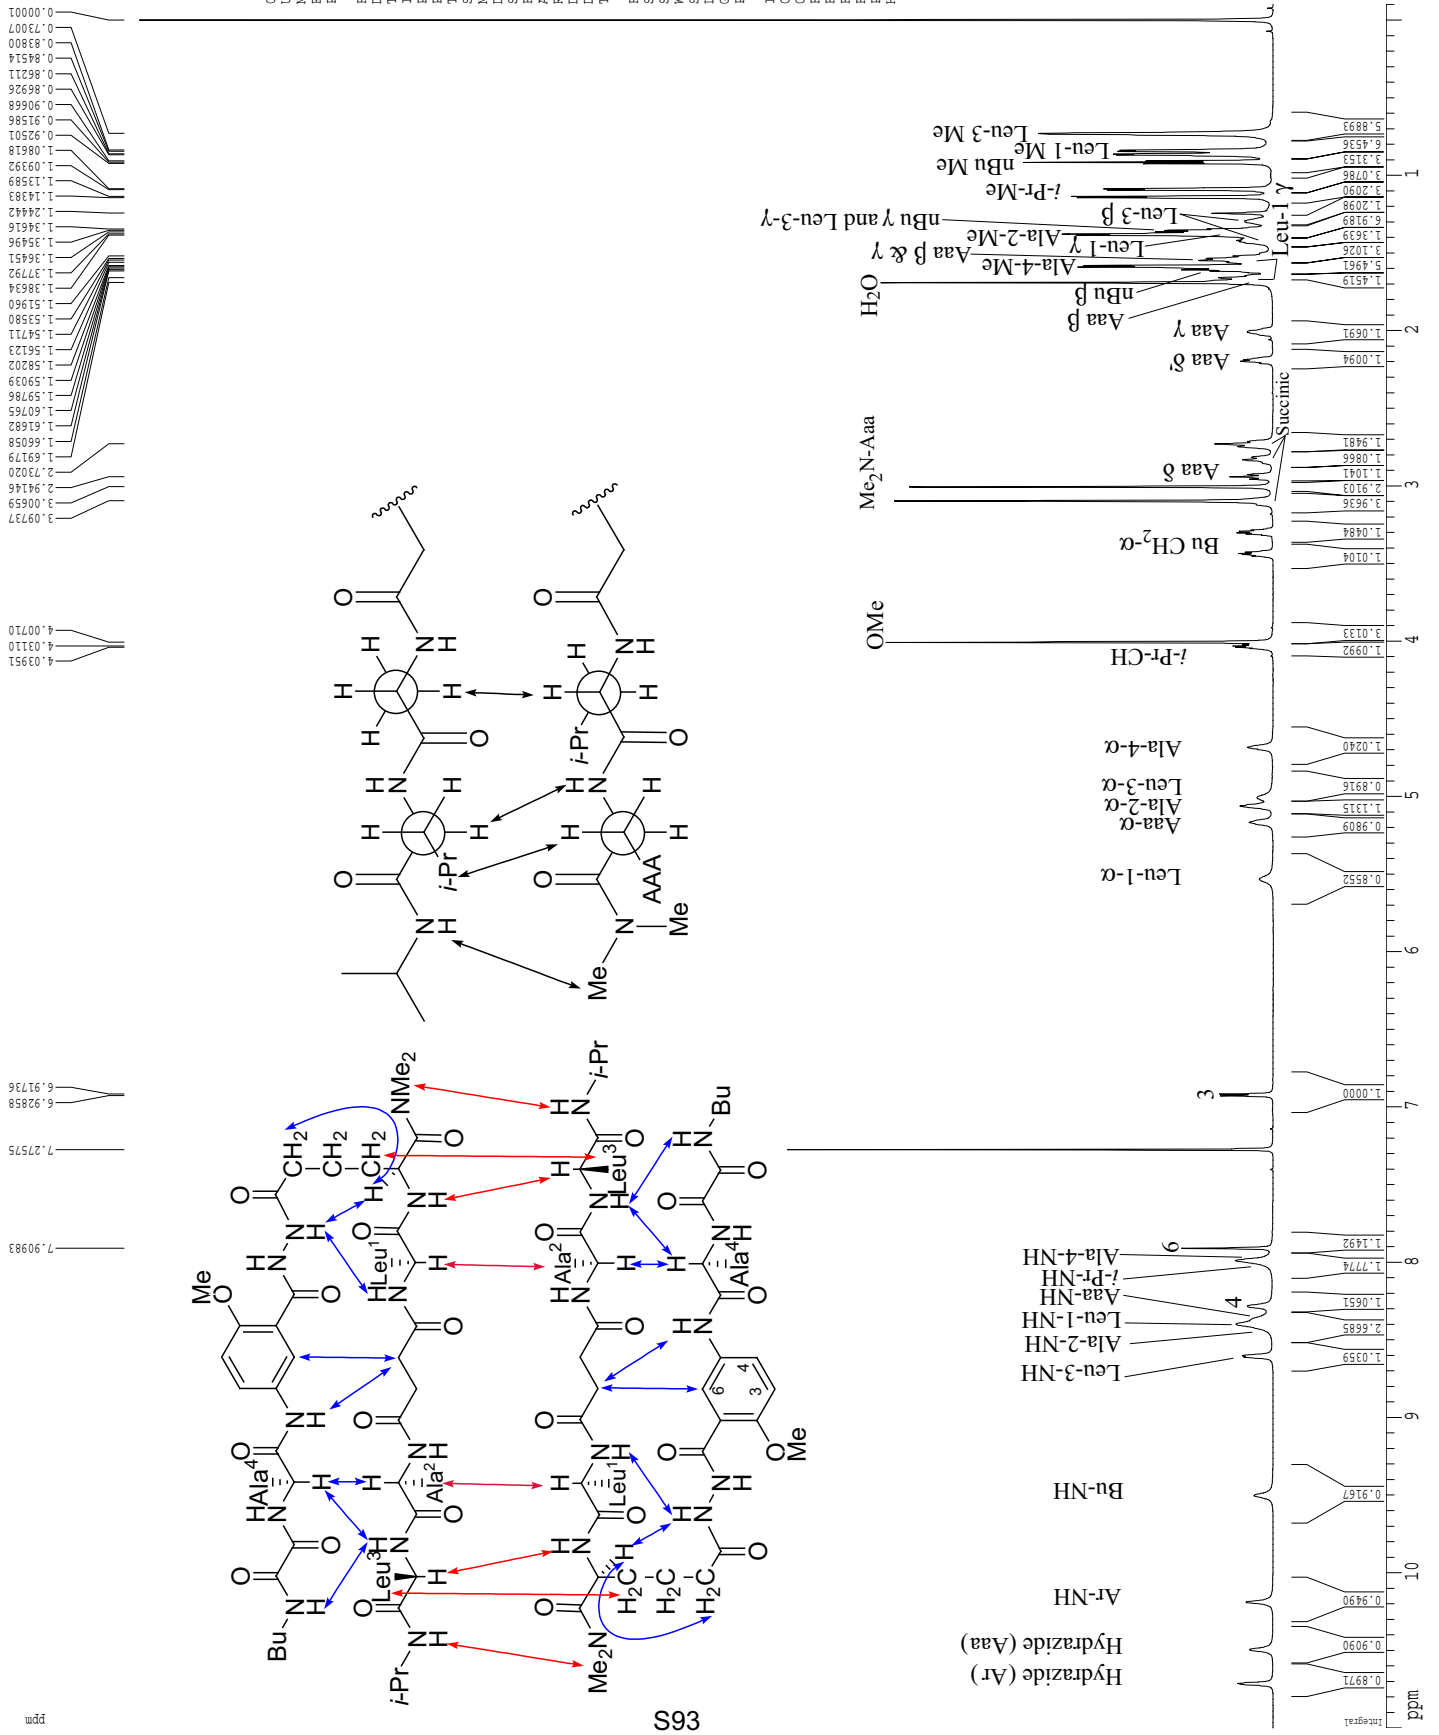





Current Data Parameters  
USER slevin  
NAME SL-7-213-800-H  
EXPNO 2  
PROCNO 1

## F2 - Acquisition Parameters

Date\_ 20070122  
Time\_ 0.00  
INSTRUM varian  
PROBHD 40:5mmrbroadban  
PULPROG gpcosy  
TD 4096  
SOLVENT cdcl3  
NS 8  
DS 64  
SWH 11001.101 Hz  
FIDRES 2.685816 Hz  
AQ 0.1843700 sec  
RG 4096  
DW 45.450 usec  
DE 231.43 usec  
TE 268.5 K

## F1 - Acquisition parameters

ND0 1  
TD 512  
SF01 799.8107 MHz  
FIDRES 21.486525 Hz  
SW 13.755 ppm  
FRMODE undefined

## F2 - Processing parameters

SI 2048  
SF 799.8064140 MHz  
WDW SINE  
SSB 0  
LB 0.00 Hz  
GB 0  
PC 1.40

## F1 - Processing parameters

SI 512  
MC2 OF  
SF 799.8064140 MHz  
WDW SINE  
SSB 0  
LB 0.00 Hz  
GB 0

## 2D NMR plot parameters

CX2 15.00 cm  
CX1 15.00 cm  
F2PLO 5.600 ppm  
F2LO 4478.92 Hz  
F2PHI -0.100 ppm  
F2HI -79.98 Hz  
F1PLO 5.600 ppm  
F1LO 4478.92 Hz  
F1PHI -0.100 ppm  
F1HI -79.98 Hz  
F2PNCM 0.38000 ppm/cm  
F2ZCM 303.92645 Hz/cm  
F1PNCM 0.38000 ppm/cm  
F1ZCM 303.92645 Hz/cm

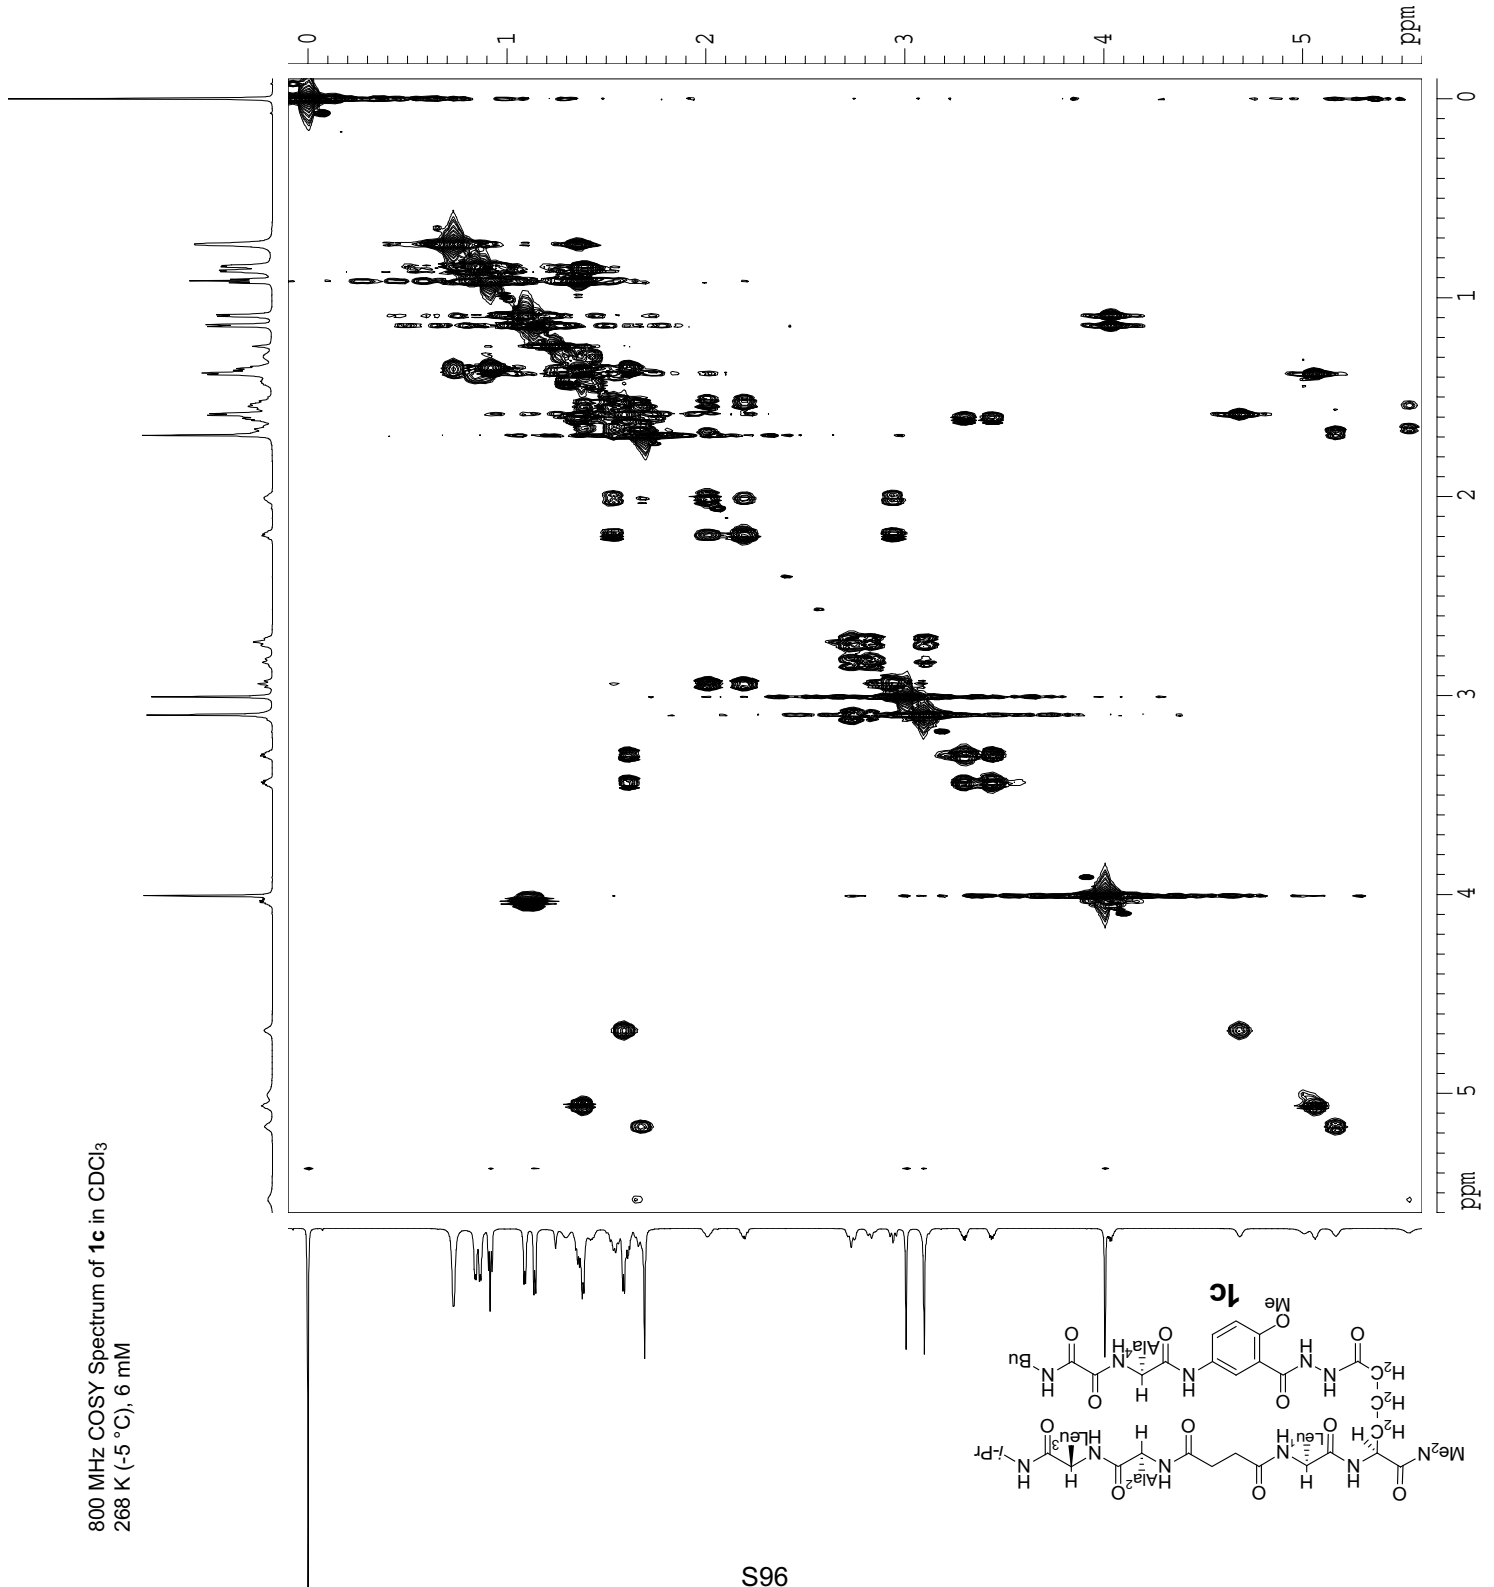



Current Data Parameters  
 USER slevin  
 NAME SL-7-213-800-H  
 EXPNO 2  
 PROCNO 1

F2 - Acquisition Parameters

Date\_ 20070122  
 Time\_ 0.00  
 INSTRUM varian  
 PROBHD 40:5mmrbroadban  
 PULPROG gcosy  
 TD 4096  
 SOLVENT cdcl3  
 NS 8  
 DS 64  
 SWH 11001.101 Hz  
 FIDRES 2.685816 Hz  
 AQ 0.1843700 sec  
 RG 4096  
 DW 45.450 usec  
 DE 231.43 usec  
 TE 268.5 K

F1 - Acquisition parameters

ND0 1  
 TD 512  
 SF01 799.8107 MHz  
 FIDRES 21.486525 Hz  
 SW 13.755 ppm  
 FnmODE undefined

F2 - Processing parameters

SI 2048  
 SF 799.8064140 MHz  
 WDW SINE  
 SSB 0  
 LB 0.00 Hz  
 GB 0  
 PC 1.40

F1 - Processing parameters

SI 512  
 MC2 QF  
 SF 799.8064140 MHz  
 WDW SINE  
 SSB 0  
 LB 0.00 Hz  
 GB 0

2D NMR plot parameters

CX2 15.00 cm  
 CX1 15.00 cm  
 F2PLO 11.000 ppm  
 F2LLO 8797.87 Hz  
 F2PHI 5.600 ppm  
 F2HTI 4478.92 Hz  
 F1PLO 5.620 ppm  
 F1LLO 4494.71 Hz  
 F1PHI -0.102 ppm  
 F1HTI -81.92 Hz  
 F2PPMCM 0.36000 ppm/cm  
 F2HZCM 287.93030 Hz/cm  
 F1PPMCM 0.38148 ppm/cm  
 F1HZCM 305.10861 Hz/cm

800 MHz COSY Spectrum of **1c** in CDCl<sub>3</sub>  
 268 K (-5 °C), 6 mM

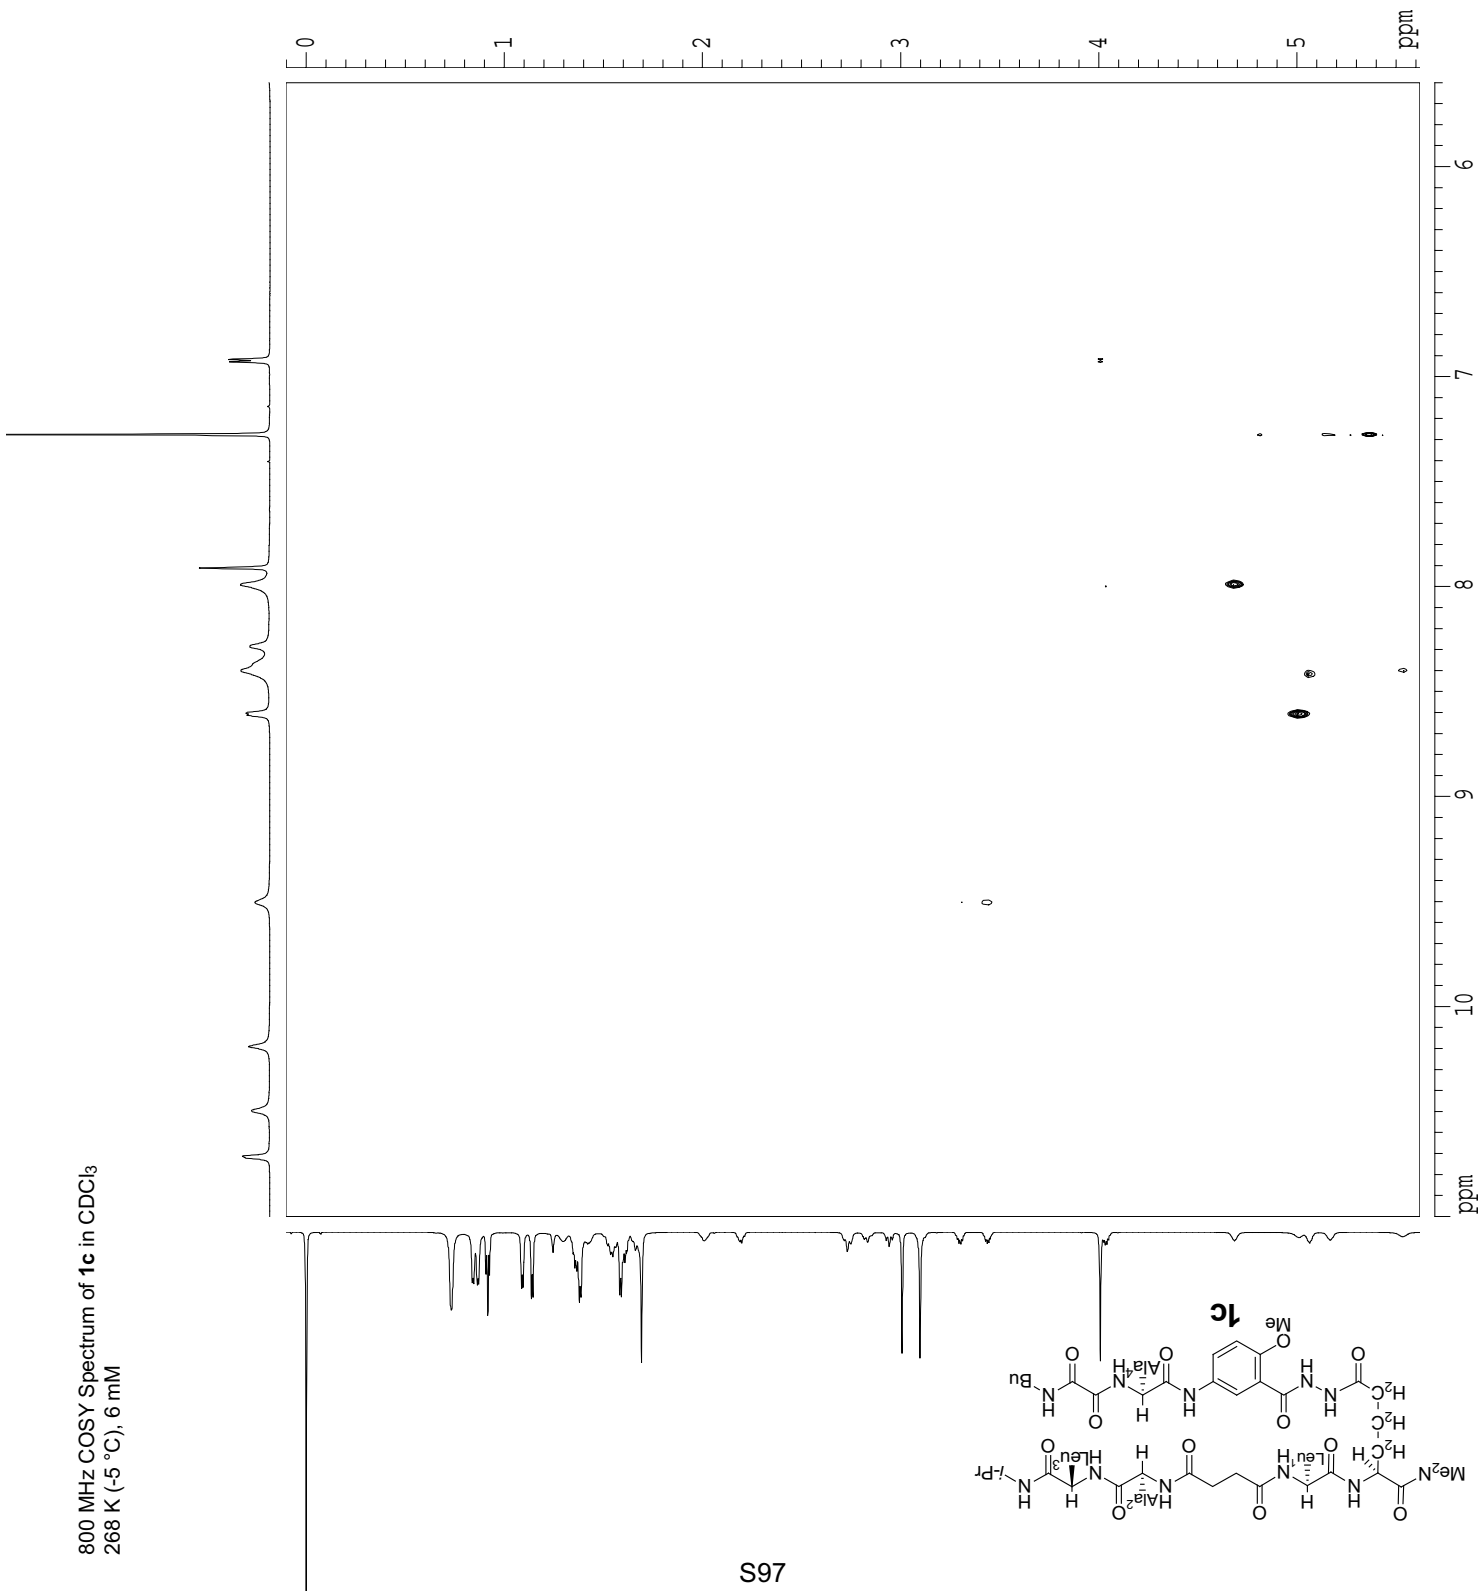

Current Data Parameters  
 USER slewin  
 NAME SL-7-213-800-H  
 EXPNO 2  
 PROCNO 1

## F2 - Acquisition Parameters

Date 20070122  
 Time 0.00  
 INSTRUM varian  
 PROBD 40.5mm broadband  
 PULPROG gcpsy  
 TD 4096  
 SOLVENT cdcl3  
 NS 8  
 DS 64  
 SWH 11001.101 Hz  
 FIDRES 2.685816 Hz  
 AQ 0.1843700 sec  
 RG 4096  
 DW 45.450 usec  
 DE 231.43 usec  
 TE 268.5 K

## F1 - Acquisition parameters

ND0 1  
 TD 512  
 SF01 799.8107 MHz  
 FIDRES 21.486525 Hz  
 SW 13.755 ppm  
 FMODE undefined

## F2 - Processing parameters

SI 2048  
 SF 799.8064140 MHz  
 WDW SINE  
 SSB 0  
 LB 0.00 Hz  
 GB 0  
 PC 1.40

## F1 - Processing parameters

SI 512  
 MC2 QF  
 SF 799.8064140 MHz  
 WDW SINE  
 SSB 0  
 LB 0.00 Hz  
 GB 0

## 2D NMR plot parameters

CX2 15.00 cm  
 CX1 15.00 cm  
 F2PLO 11.000 ppm  
 F2LO 8797.87 Hz  
 F2PHI 5.600 ppm  
 F2HI 4478.92 Hz  
 F1PLO 11.000 ppm  
 F1LO 8797.87 Hz  
 F1PHI 5.600 ppm  
 F1HI 4478.92 Hz  
 F2PPMCW 0.36000 ppm/cm  
 F2HZCM 287.93030 Hz/cm  
 F1PPMCW 0.36000 ppm/cm  
 F1HZCM 287.93030 Hz/cm

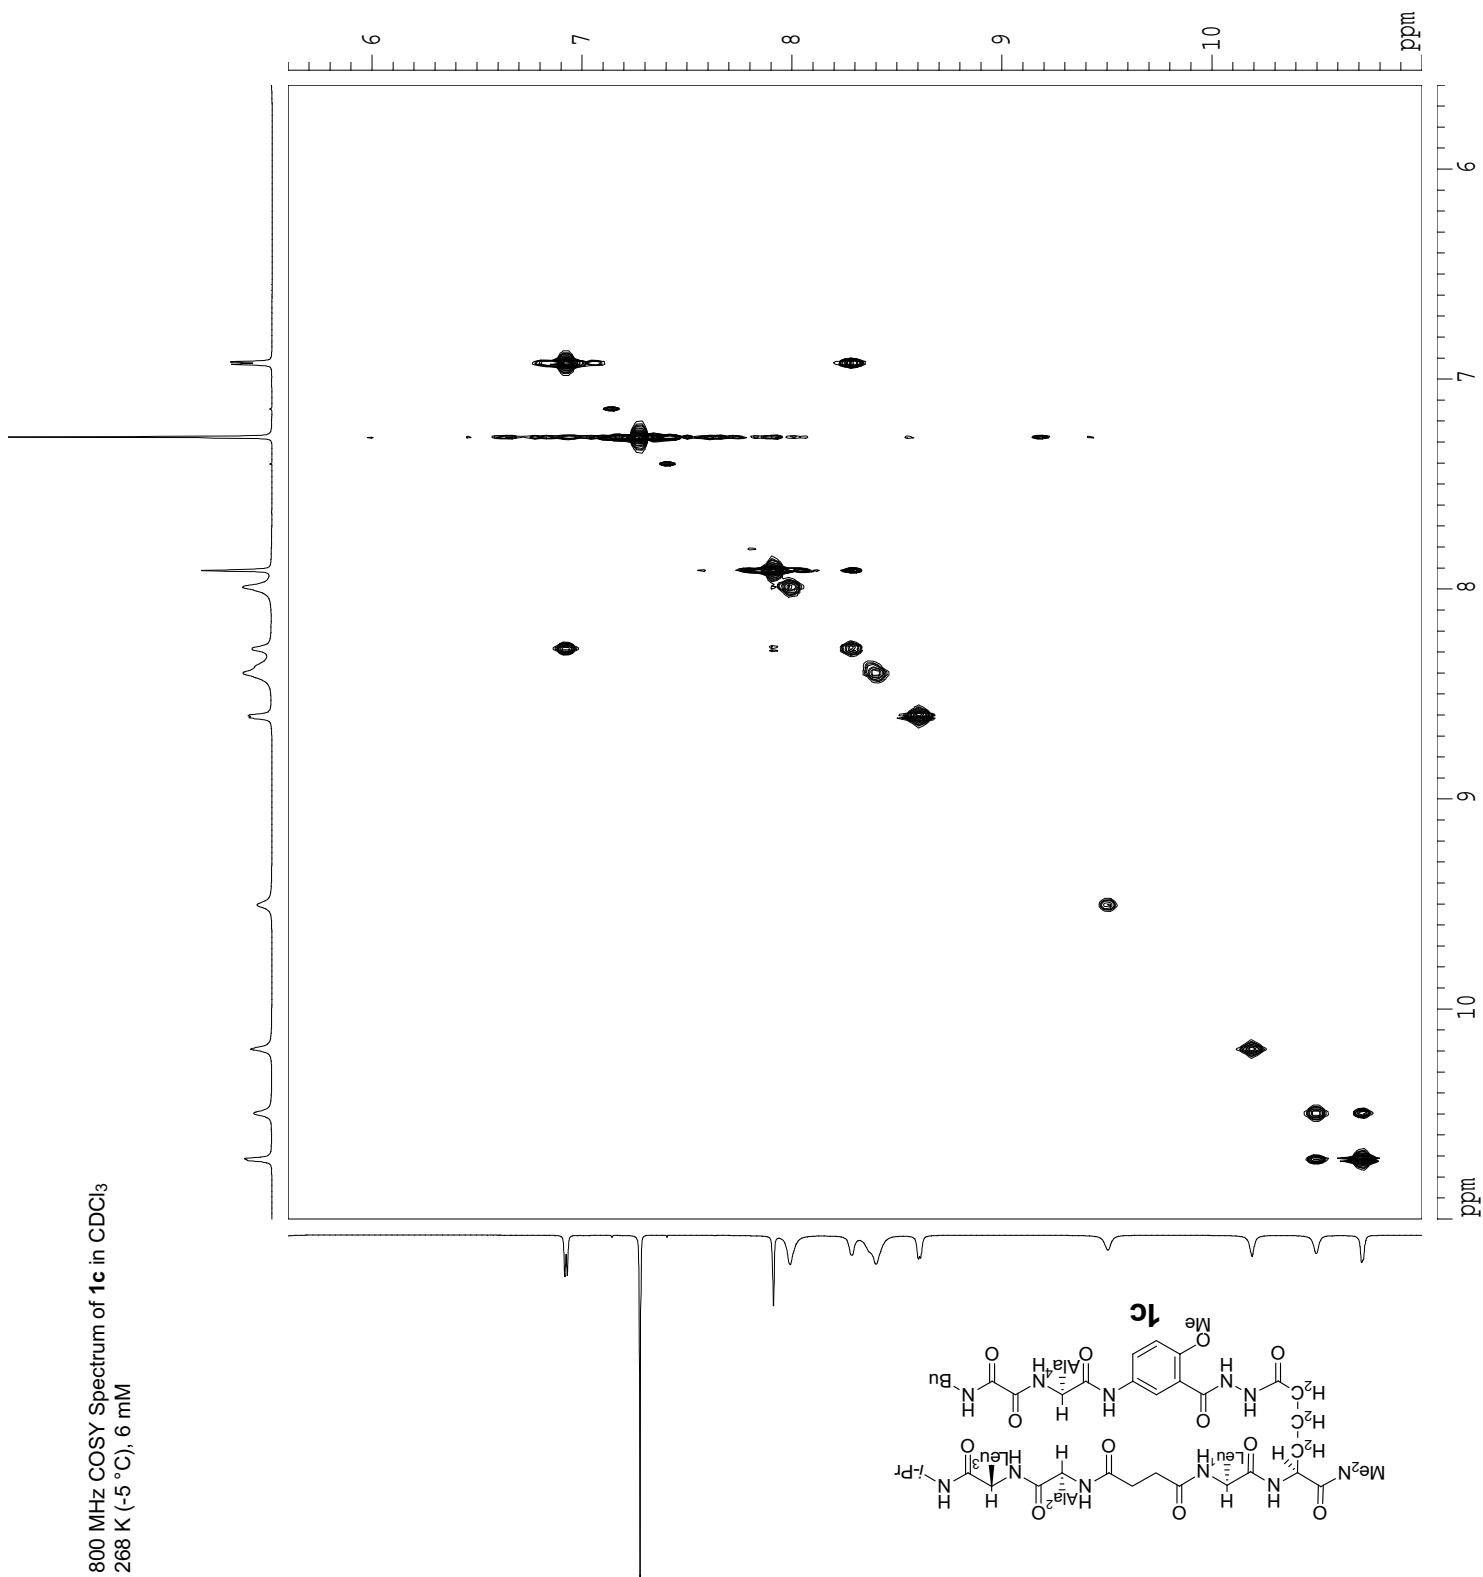

Supporting Information

S. Levin and J. S. Nowick

Current Data Parameters  
 USER slevin  
 NAME SL-7-213-800-H  
 EXPNO 2  
 PROCNO 1

F2 - Acquisition Parameters

Date\_ 20070122  
 Time\_ 0.00  
 INSTRUM varian  
 PROBHD 40:5mmrbroadban  
 PULPROG gcosy  
 TD 4096  
 SOLVENT cdcl3  
 NS 8  
 DS 64  
 SWH 11001.101 Hz  
 FIDRES 2.685816 Hz  
 AQ 0.1843700 sec  
 RG 4096  
 DW 45.450 usec  
 DE 231.43 usec  
 TE 268.5 K

F1 - Acquisition Parameters

ND0 1  
 TD 512  
 SFO1 799.8107 MHz  
 FIDRES 21.486525 Hz  
 SW 13.755 ppm  
 F1MODE undefined

F2 - Processing parameters

SI 2048  
 SF 799.8064140 MHz  
 WDW SINE  
 SSB 0  
 LB 0.00 Hz  
 GB 0  
 PC 1.40

F1 - Processing parameters

SI 512  
 MC2 OF  
 SF 799.8064140 MHz  
 WDW SINE  
 SSB 0  
 LB 0.00 Hz  
 GB 0

2D NMR plot parameters

CX2 15.00 cm  
 CX1 15.00 cm  
 F2PLO 5.600 ppm  
 F2LO 4478.92 Hz  
 F2PHI -0.100 ppm  
 F2HI -79.98 Hz  
 F1PLO 11.020 ppm  
 F1LO 8813.50 Hz  
 F1PHI 5.593 ppm  
 F1HI 4473.23 Hz  
 F2PMCM 0.38000 ppm/cm  
 F2HZCM 303.92645 Hz/cm  
 F1PMCM 0.36178 ppm/cm  
 F1HZCM 289.35184 Hz/cm

800 MHz COSY Spectrum of **1c** in CDCl<sub>3</sub>  
 268 K (-5 °C), 6 mM

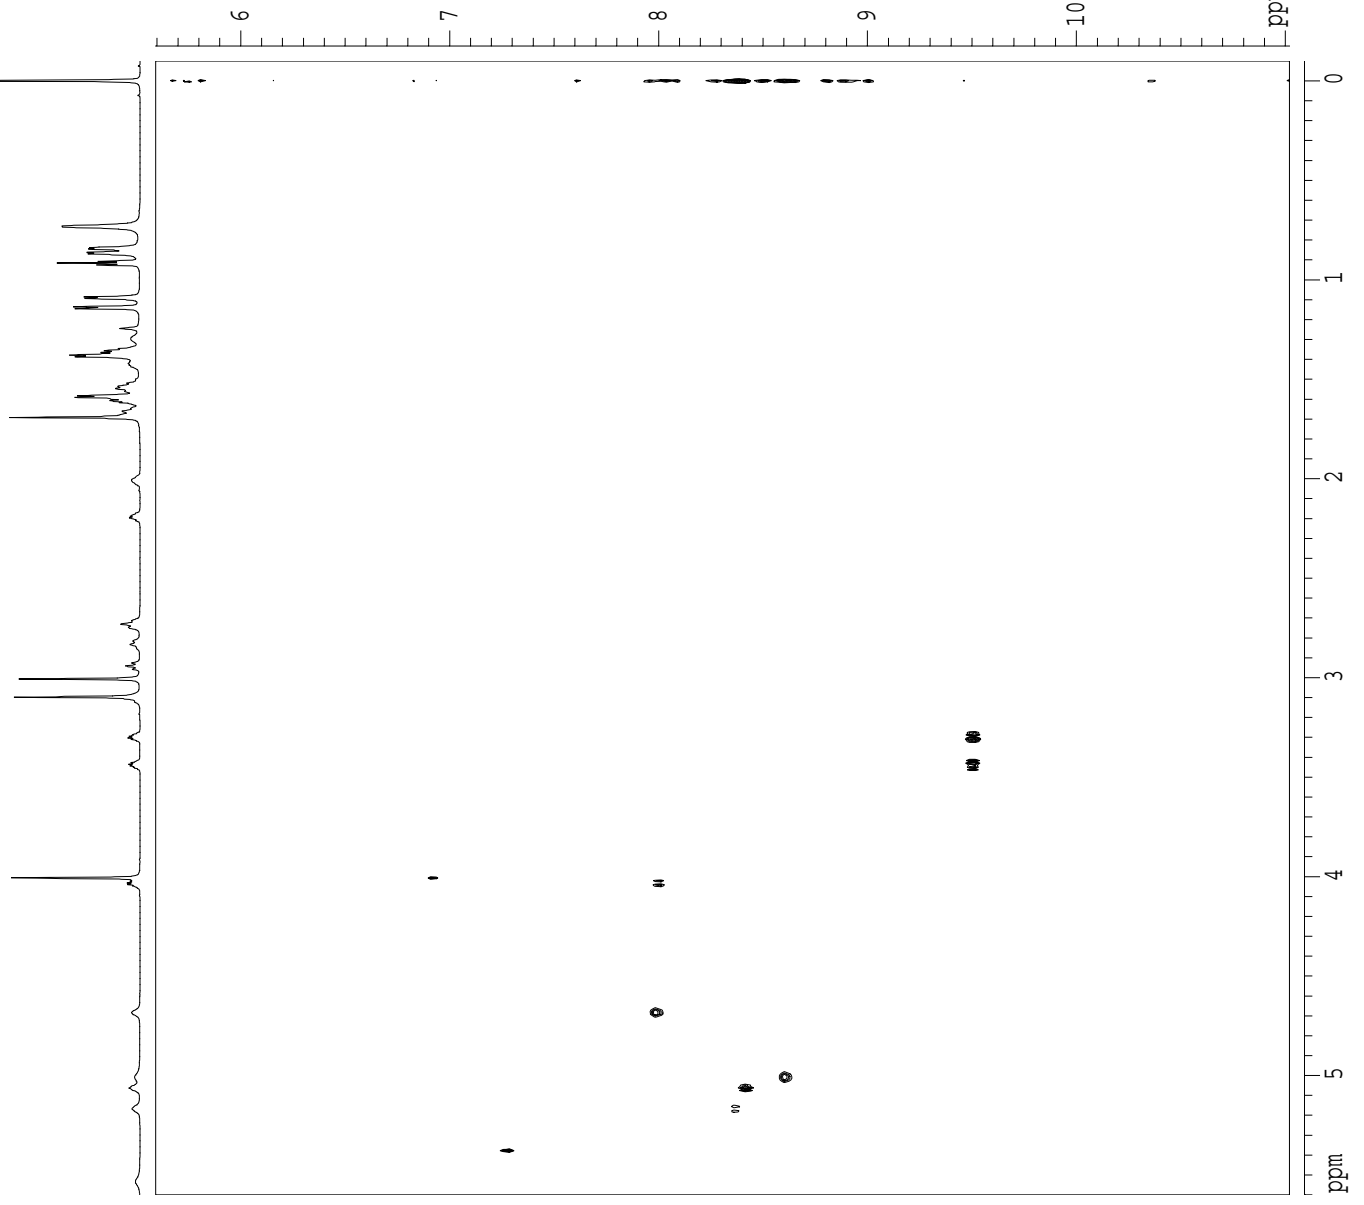

Supporting Information

S. Levin and J. S. Nowick

Current Data Parameters  
 USER slevin  
 NAME SL-7-213-800-H  
 EXPNO 2  
 PROCNO 1

F2 - Acquisition Parameters

Date\_ 20070122  
 Time 0.00  
 INSTRUM varian  
 PROBHD 40:5mm broadband  
 PULPROG gpcsy  
 TD 4096  
 SOLVENT cdc13  
 NS 8  
 DS 64  
 SWH 11001.101 Hz  
 FIDRES 2.685816 Hz  
 AQ 0.1843700 sec  
 RG 4096  
 DW 45.450 usec  
 DE 231.43 usec  
 TE 268.5 K

F1 - Acquisition Parameters

ND0 1  
 TD 512  
 SFO1 799.8107 MHz  
 FIDRES 21.486525 Hz  
 SW 13.755 ppm  
 F1MODE undefined

F2 - Processing parameters

SI 2048  
 SF 799.8064140 MHz  
 WDW SINE  
 SSB 0  
 LB 0.00 Hz  
 GB 0  
 PC 1.40

F1 - Processing parameters

SI 512  
 MC2 QF  
 SF 799.8064140 MHz  
 WDW SINE  
 SSB 0  
 LB 0.00 Hz  
 GB 0

2D NMR plot parameters

CX2 15.00 cm  
 CX1 15.00 cm  
 F2PLO 1.800 ppm  
 F2LO 1439.65 Hz  
 F2PHI 0.600 ppm  
 F2HI 479.88 Hz  
 F1PLO 1.800 ppm  
 F1LO 1439.65 Hz  
 F1PHI 0.600 ppm  
 F1HI 479.88 Hz  
 F2PFCM 0.08000 ppm/cm  
 F2HZCM 63.98452 Hz/cm  
 F1PFCM 0.08000 ppm/cm  
 F1HZCM 63.98452 Hz/cm

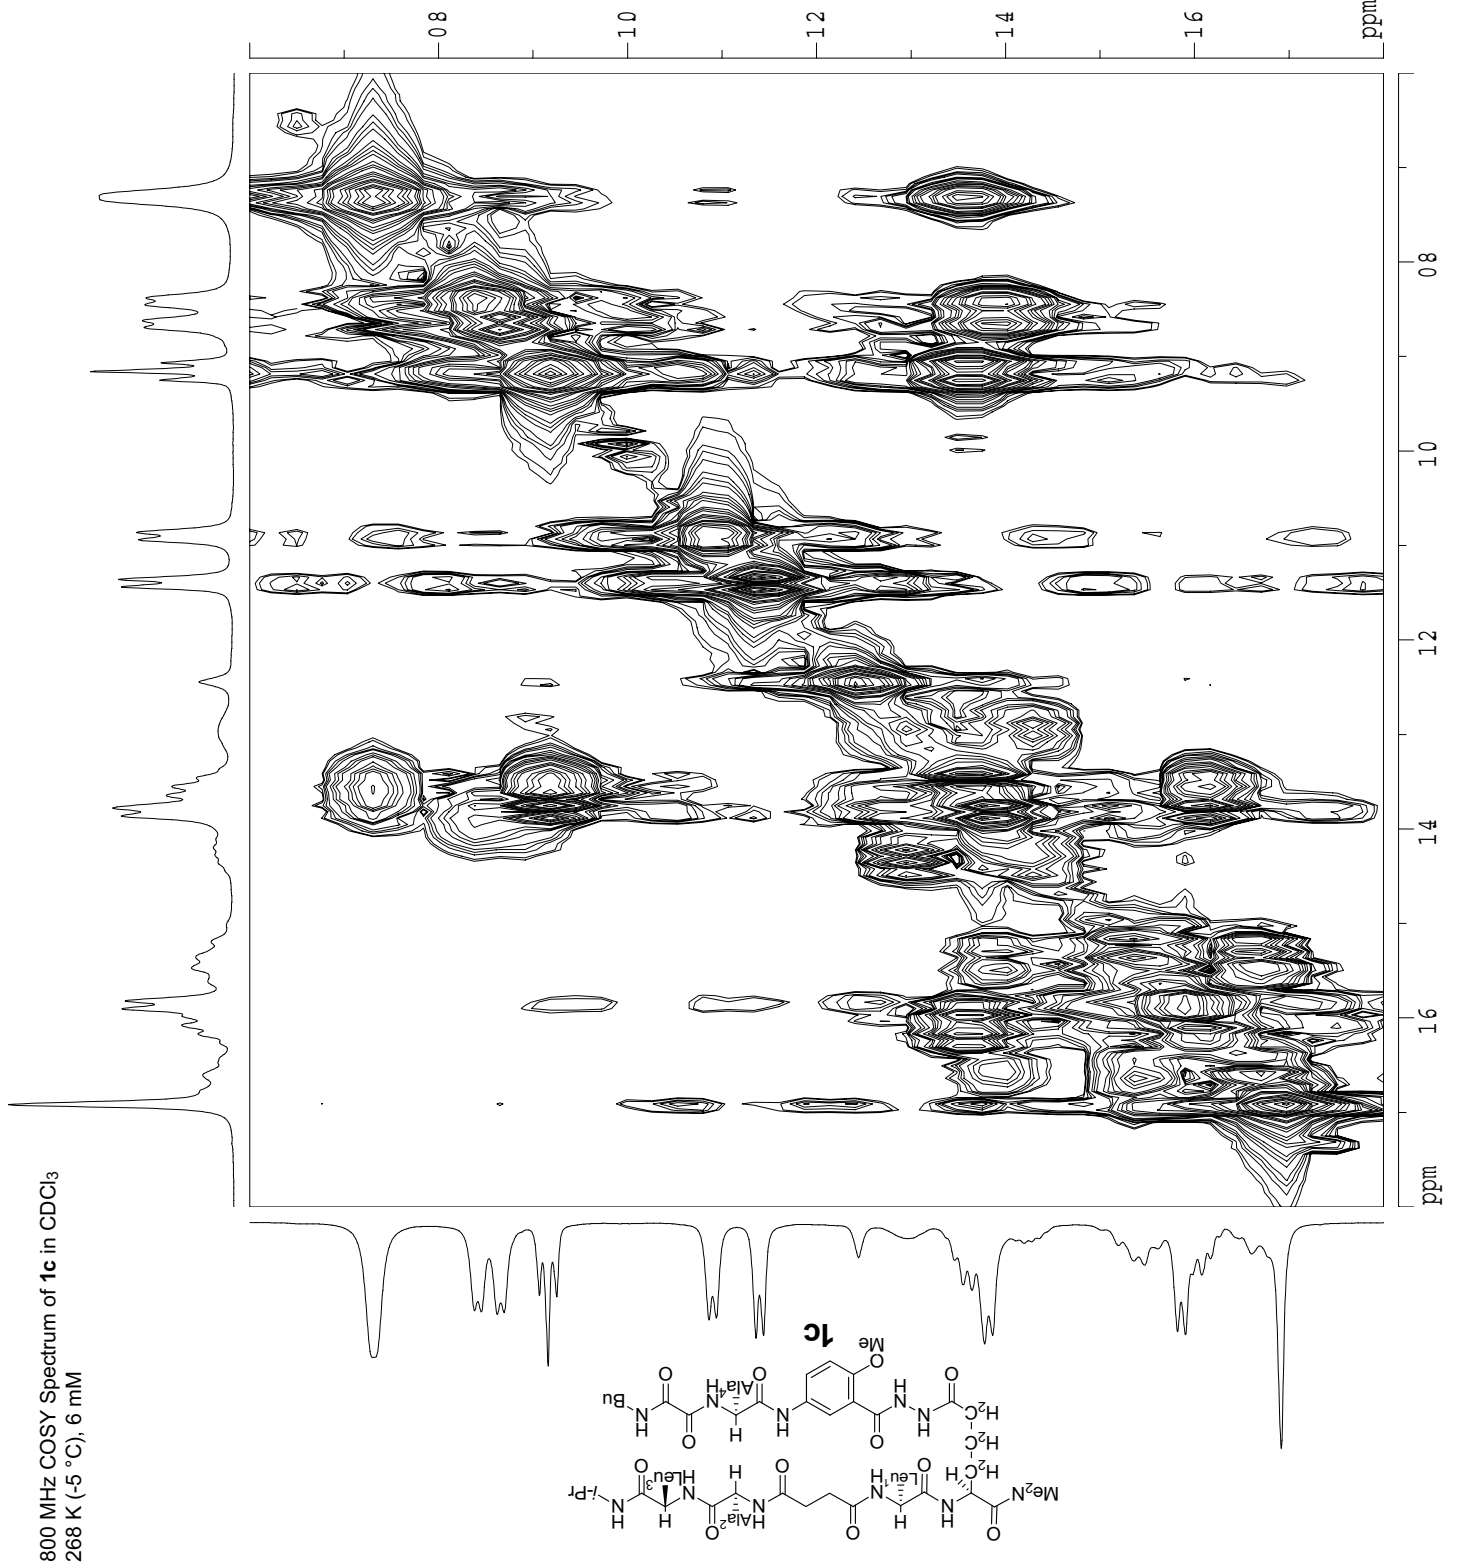

800 MHz COSY Spectrum of **1c** in CDCl<sub>3</sub>  
 268 K (-5 °C), 6 mM

Supporting Information

S. Levin and J. S. Nowick

Current Data Parameters  
 USER slewin  
 NAME SL-7-213-800-H  
 EXPNO 3  
 PROCNO 1

F2 - Acquisition Parameters  
 Date\_ 20070122  
 Time 0.00  
 INSTRUM varian  
 PROBHD 40:5mmBroadban  
 PULPROG wgtocsy.bn  
 TD 4096  
 SOLVENT CDCl3  
 NS 16  
 DS 64  
 SWH 11001.101 Hz  
 FIDRES 2.685816 Hz  
 AQ 0.1862132 sec  
 RG 287.4  
 DW 45.450 usec  
 DE 6.00 usec  
 TE 288.5 K

F1 - Acquisition Parameters  
 ND0 1  
 TD 1024  
 SFO1 799.8107 MHz  
 FIDRES 10.743262 Hz  
 SW 13.755 ppm  
 FwMODE undefined

F2 - Processing parameters  
 SI 2048  
 SF 799.8064126 MHz  
 WDW QSI  
 SSB 2  
 LB 0.00 Hz  
 GB 0  
 PC 1.40

F1 - Processing parameters  
 SI 2048  
 MC2 States  
 SF 799.8064126 MHz  
 WDW QSI  
 SSB 2  
 LB 0.00 Hz  
 GB 0

2D NMR plot parameters  
 CX2 15.00 cm  
 CX1 15.00 cm  
 F2PLO 11.000 ppm  
 F2LO 8797.87 Hz  
 F2PHI -0.100 ppm  
 F2HI -79.98 Hz  
 F1PLO 11.001 ppm  
 F1LO 8798.73 Hz  
 F1PHI -0.101 ppm  
 F1HI -80.57 Hz  
 F2PPMCM 0.74000 ppm/cm  
 F2HZCM 591.85669 Hz/cm  
 F1PPMCM 0.74012 ppm/cm  
 F1HZCM 591.95367 Hz/cm

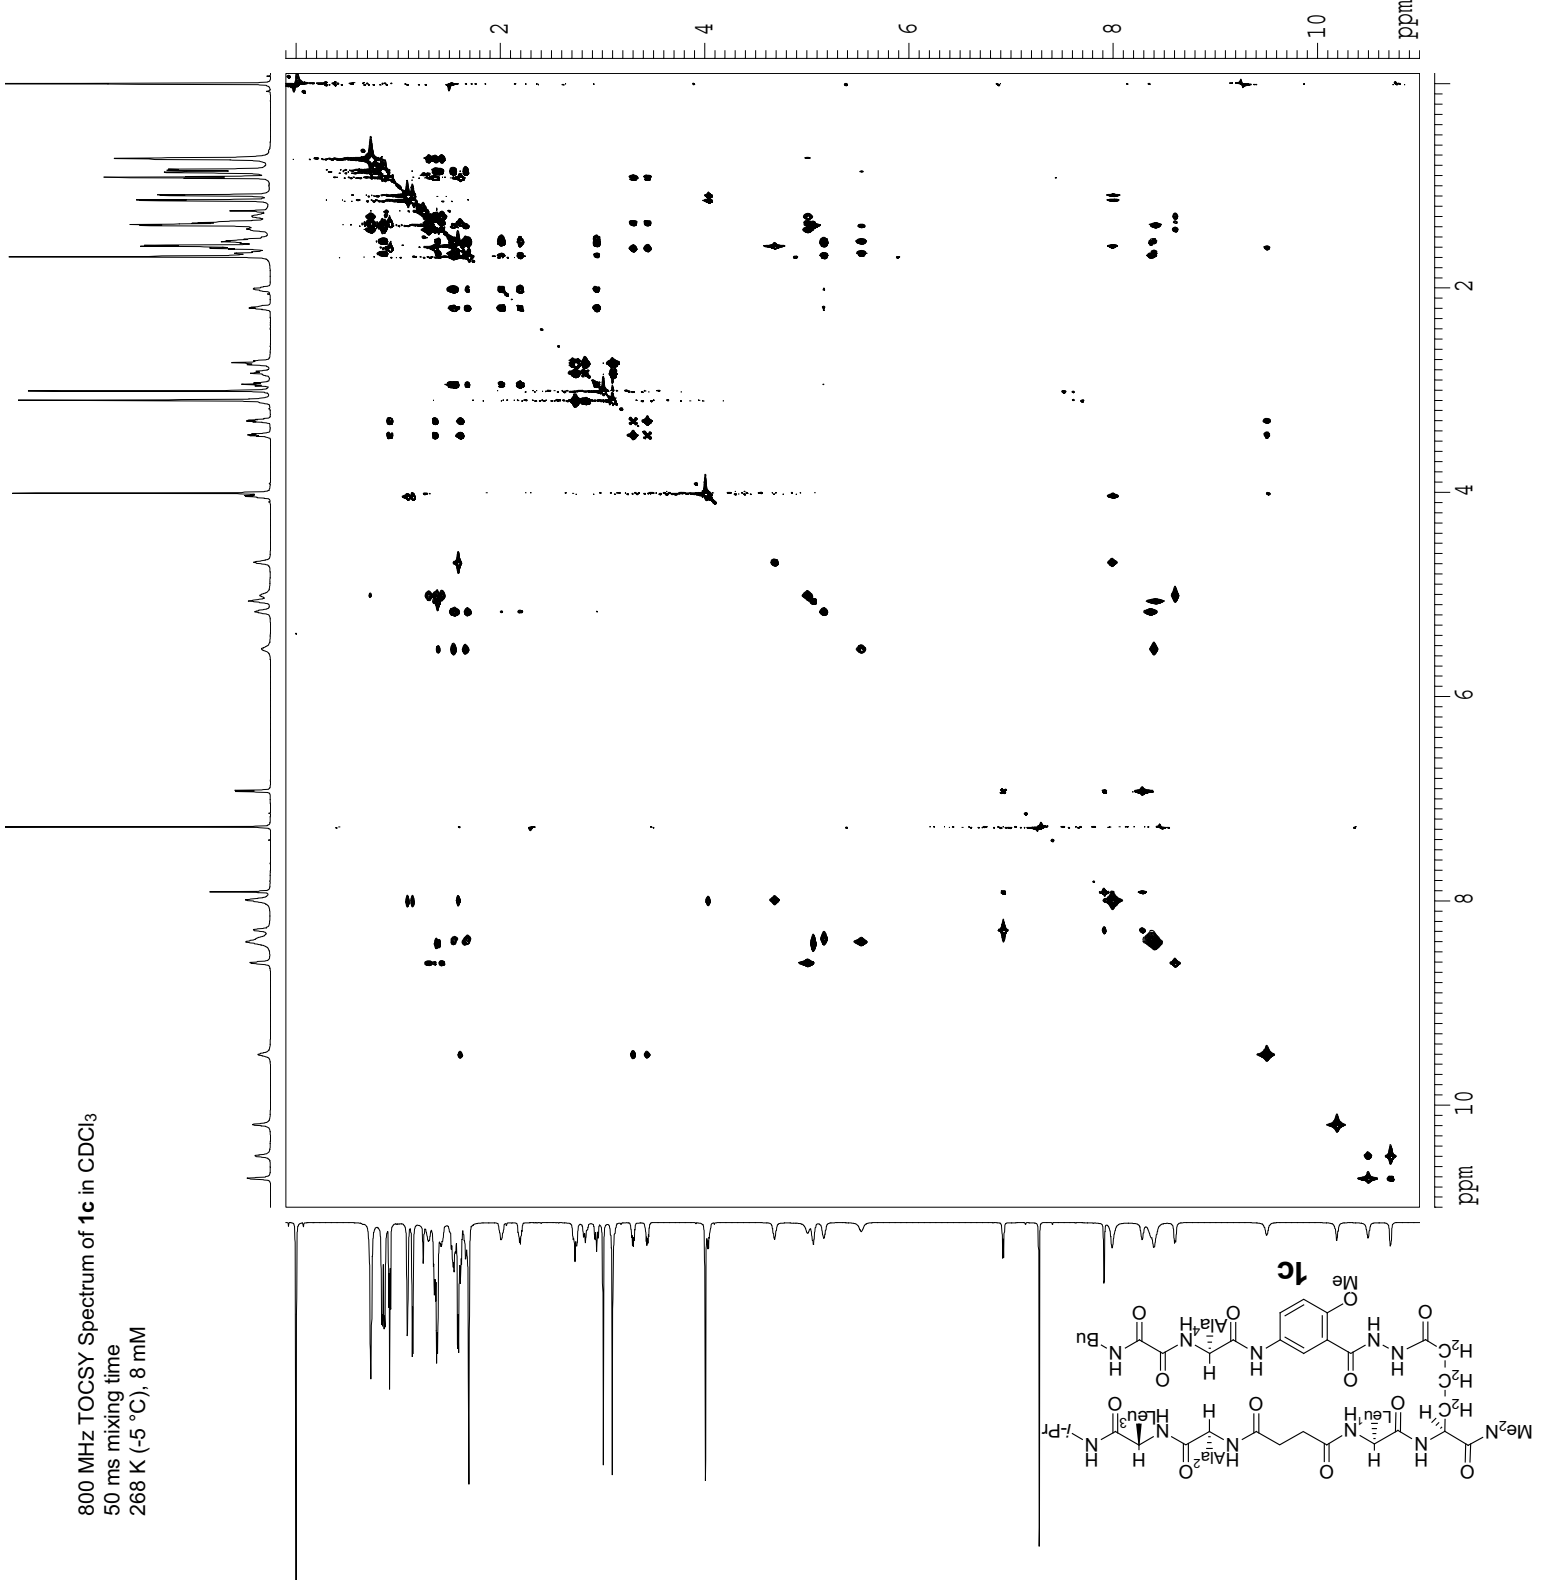

800 MHz TOCSY Spectrum of **1c** in CDCl<sub>3</sub>  
 50 ms mixing time  
 288 K (-5 °C), 8 mM

## Current Data Parameters

USER slevin  
 NAME SL-7-213-800-H  
 EXPNO 3  
 PROCNO 1

## F2 - Acquisition Parameters

Date\_ 20070122  
 Time\_ 0.00  
 INSTRUM varian  
 PROBHD 40:5mmrbroadban  
 PULPROG wgtocpsy bn  
 TD 4096  
 SOLVENT CDCl3  
 NS 16  
 DS 64  
 SWH 11001.101 Hz  
 FIDRES 2.685816 Hz  
 AQ 0.1862132 sec  
 RG 287.4  
 DW 45.450 usec  
 DE 6.00 usec  
 TE 268.5 K

## F1 - Acquisition parameters

ND0 1  
 TD 1024  
 SF01 799.8107 MHz  
 FIDRES 10.743262 Hz  
 SW 13.755 ppm  
 F1MODE undefined

## F2 - Processing parameters

SI 2048  
 SF 799.8064126 MHz  
 WDW QSI  
 SSB 2  
 LB 0.00 Hz  
 GB 0  
 PC 1.40

## F1 - Processing parameters

SI 2048  
 MC2 States  
 SF 799.8064126 MHz  
 WDW QSI  
 SSB 2  
 LB 0.00 Hz  
 GB 0

## 2D NMR plot parameters

CX2 15.00 cm  
 CX1 15.00 cm  
 F2PLO 5.600 ppm  
 F2LO 4478.92 Hz  
 F2PHI -0.100 ppm  
 F2HI -79.98 Hz  
 F1PLO 5.600 ppm  
 F1LO 4478.92 Hz  
 F1PHI -0.100 ppm  
 F1HI -79.98 Hz  
 F2PVMCM 0.38000 ppm/cm  
 F2HZCM 303.92645 Hz/cm  
 F1PVMCM 0.38000 ppm/cm  
 F1HZCM 303.92645 Hz/cm

800 MHz TOCSY Spectrum of **1c** in CDCl<sub>3</sub>

50 ms mixing time  
 268 K (-5 °C), 8 mM

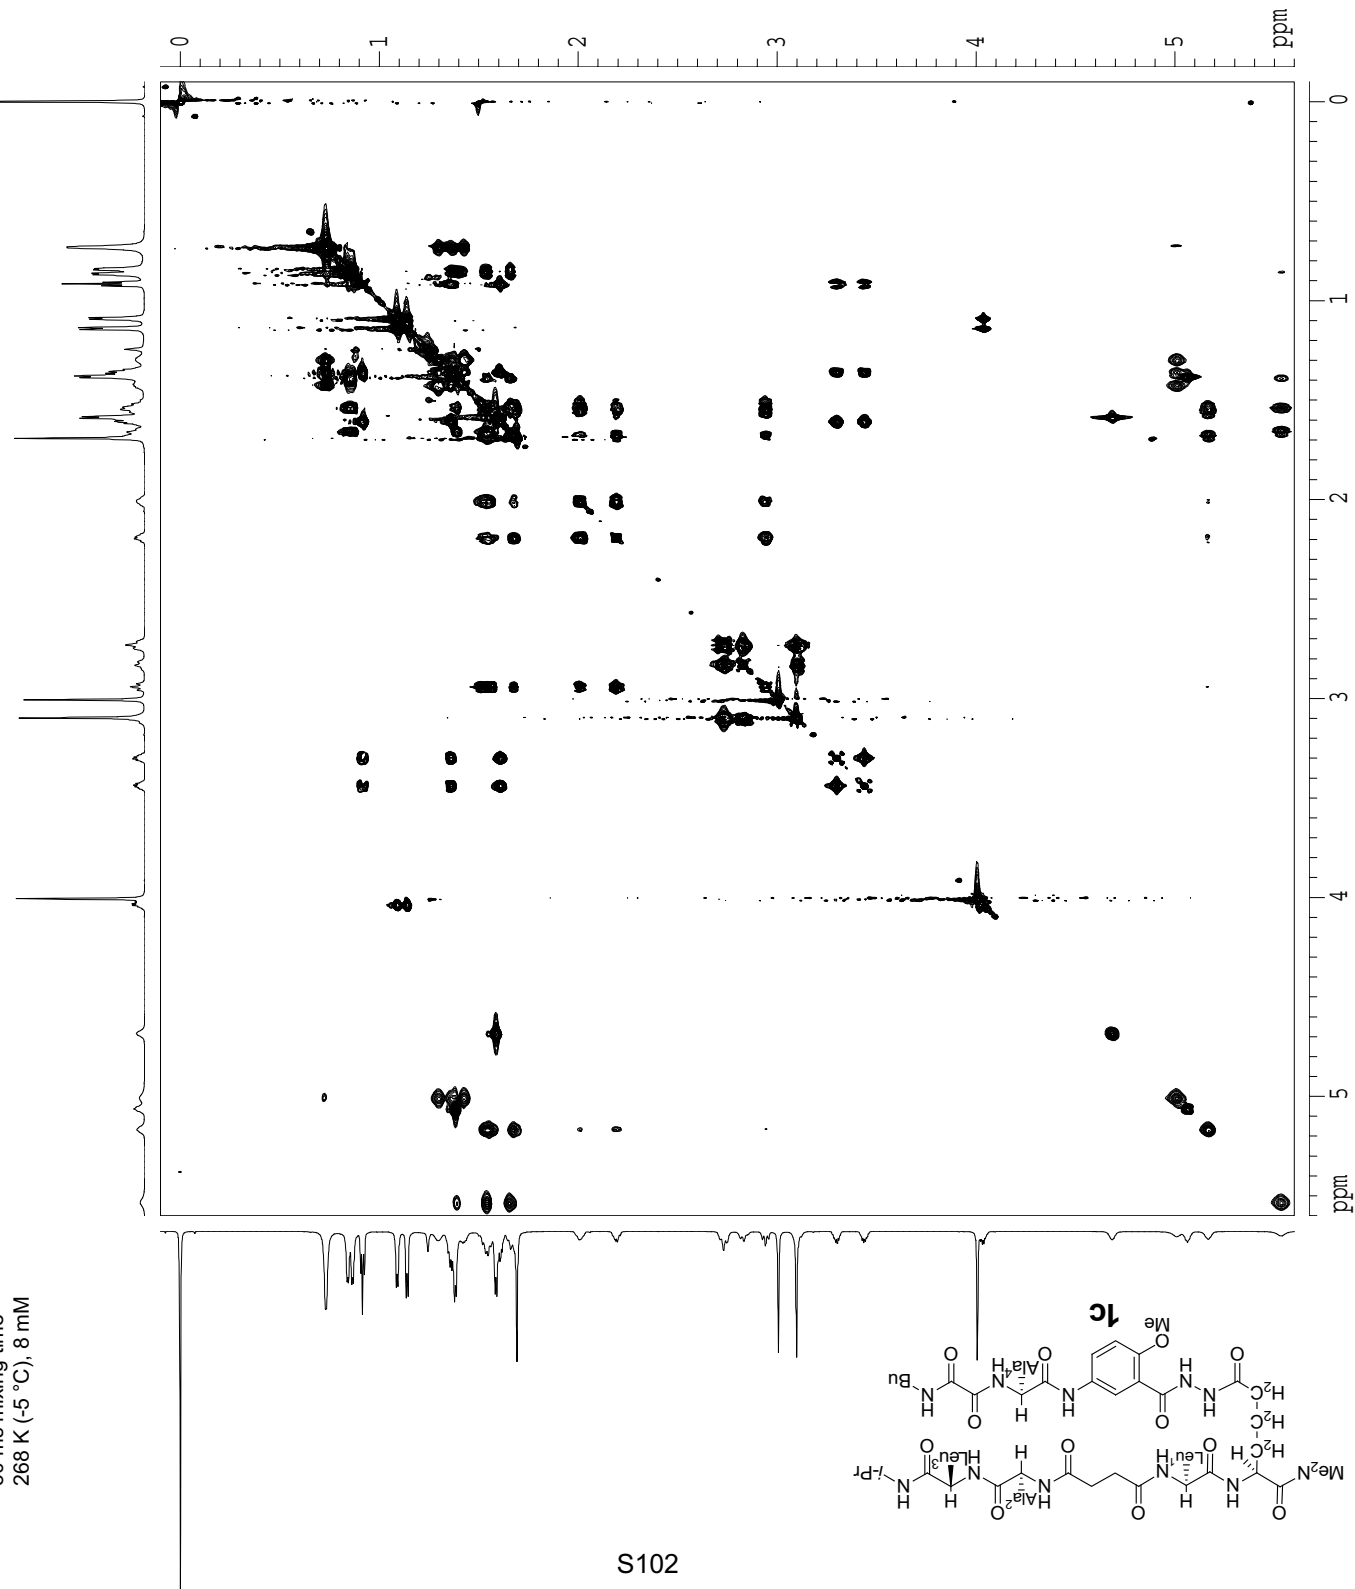

Current Data Parameters  
 USER slewin  
 NAME SL-7-213-800-H  
 EXPNO 3  
 PROCNO 1

F2 - Acquisition Parameters

Date 20070122  
 Time 0.00  
 INSTRUM varian  
 PROBHD 40:5mm broadband  
 PULPROG wgtocsy\_bn  
 TD 4096  
 SOLVENT CDCl3  
 NS 16  
 DS 64  
 SWH 11001.101 Hz  
 FIDRES 2.685816 Hz  
 AQ 0.1862132 sec  
 RG 287.4  
 DW 45.450 usec  
 DE 6.00 usec  
 TE 268.5 K

F1 - Acquisition parameters

ND0 1  
 TD 1024  
 SFO1 799.8107 MHz  
 FIDRES 10.743262 Hz  
 SW 13.755 ppm  
 FMODE undefined

F2 - Processing parameters

SI 2048  
 SF 799.8064126 MHz  
 WDW QSI  
 SSB 2  
 LB 0.00 Hz  
 GB 0  
 PC 1.40

F1 - Processing parameters

SI 2048  
 MC2 States  
 SF 799.8064126 MHz  
 WDW QSI  
 SSB 2  
 LB 0.00 Hz  
 GB 0

2D NMR plot parameters

CX2 15.00 cm  
 CX1 15.00 cm  
 F2PLO 11.000 ppm  
 F2LO 8797.87 Hz  
 F2PHI 5.600 ppm  
 F2HI 4478.92 Hz  
 F1PLO 5.601 ppm  
 F1LO 4479.94 Hz  
 F1PHI -0.101 ppm  
 F1HI -80.57 Hz  
 F2PPMCM 0.36000 ppm/cm  
 F2HZCM 287.93030 Hz/cm  
 F1PPMCM 0.38013 ppm/cm  
 F1HZCM 304.03430 Hz/cm

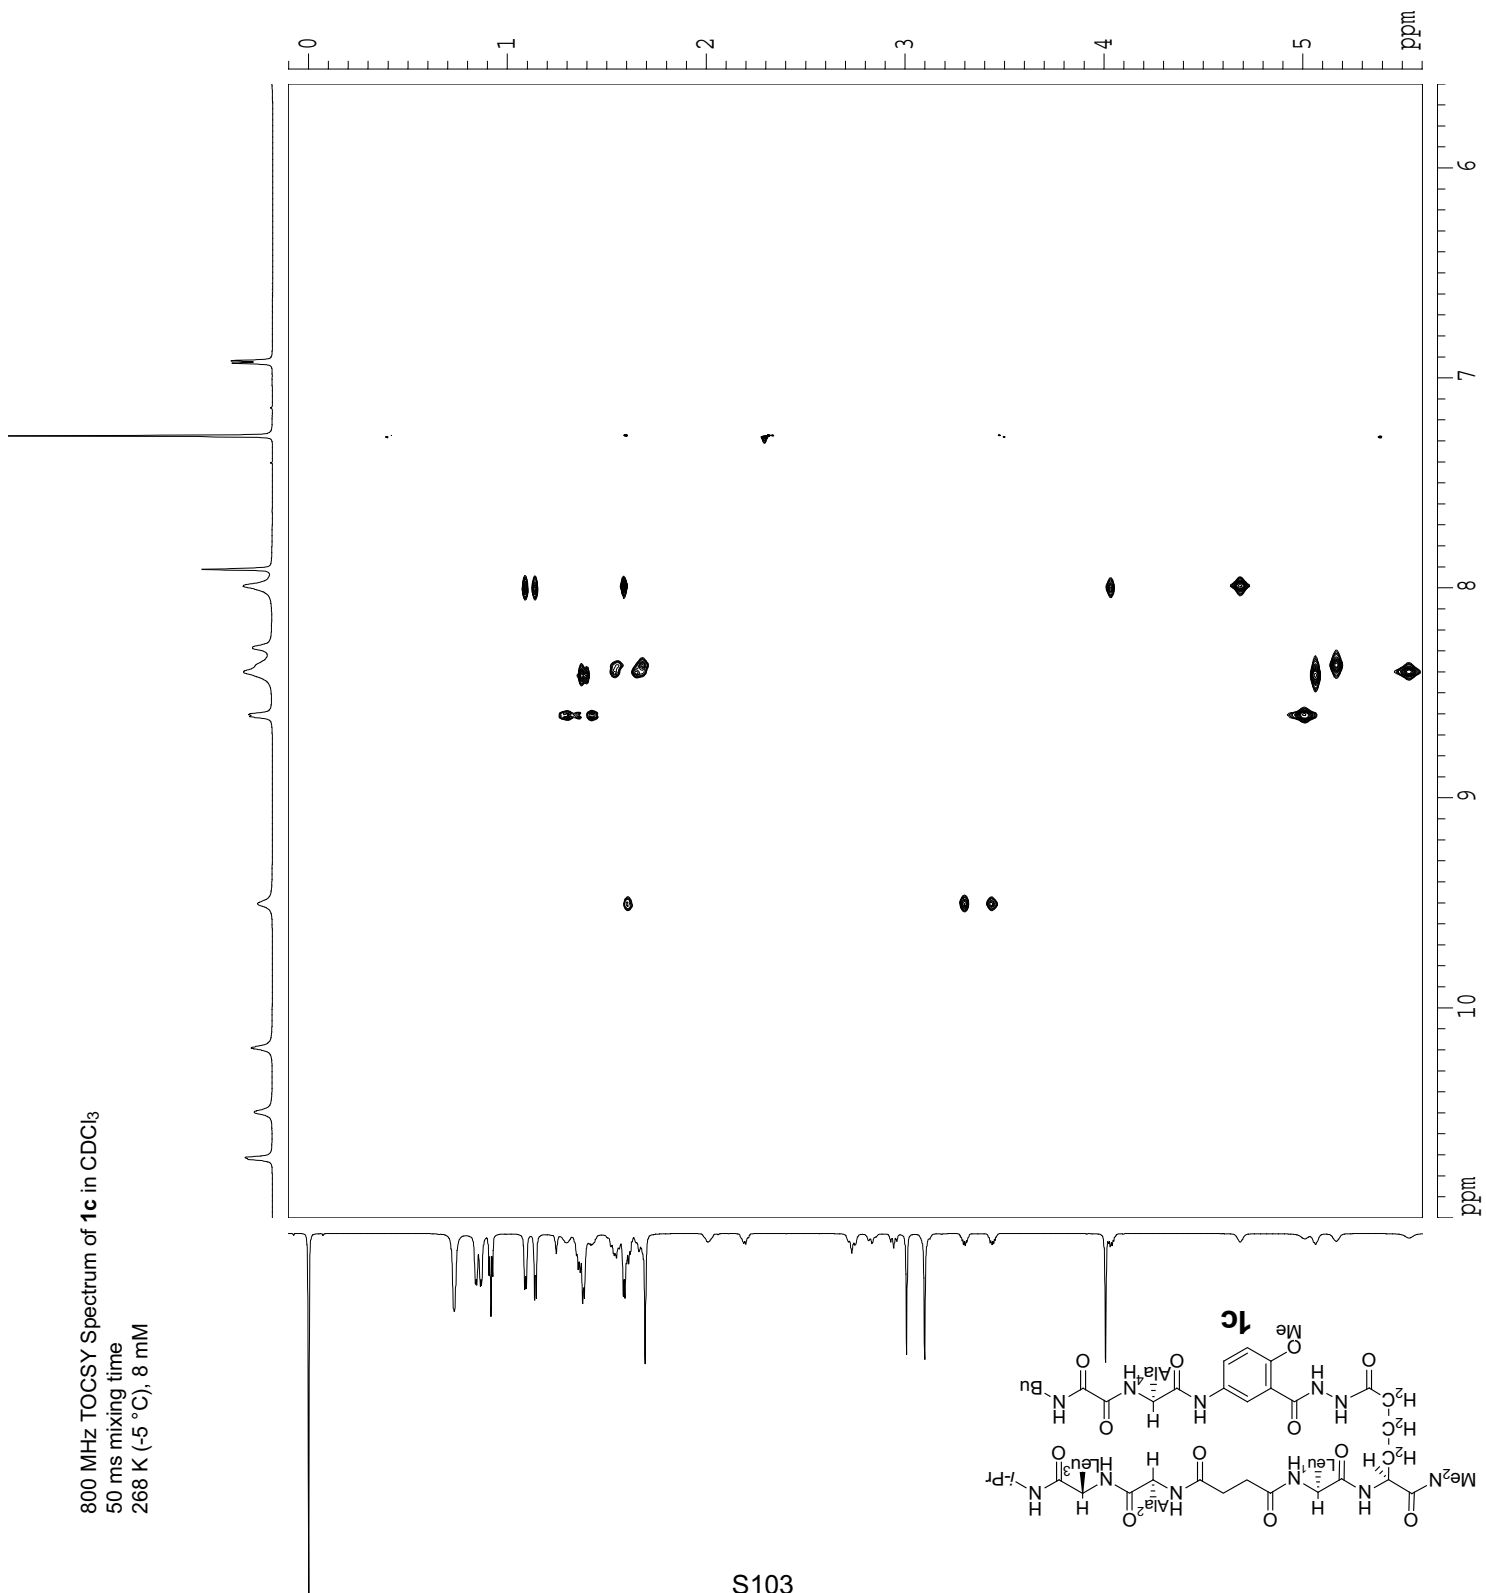

800 MHz TOCSY Spectrum of **1c** in CDCl<sub>3</sub>  
 50 ms mixing time  
 268 K (-5 °C), 8 mM

Current Data Parameters  
 USER slevin  
 NAME SL-7-213-800-H  
 EXPNO 3  
 PROCNO 1

F2 - Acquisition Parameters

Date 20070122  
 Time\_ 0.00  
 INSTRUM varian  
 PROBHD 40:5mmBroadban  
 PULPROG wgtocsy\_bn  
 TD 4096  
 SOLVENT CDCl3  
 NS 16  
 DS 64  
 SWH 11001.101 Hz  
 FIDRES 2.685816 Hz  
 AQ 0.1862132 sec  
 RG 287.4  
 DW 45.450 usec  
 DE 6.00 usec  
 TE 268.5 K

F1 - Acquisition parameters

ND0 1  
 TD 1024  
 SF01 799.8107 MHz  
 FIDRES 10.743262 Hz  
 SW 13.755 ppm  
 FhMODE undefined

F2 - Processing parameters

SI 2048  
 SF 799.8064126 MHz  
 WDW QSI  
 SSB 2  
 LB 0.00 Hz  
 GB 0  
 PC 1.40

F1 - Processing parameters

SI 2048  
 MC2 States  
 SF 799.8064126 MHz  
 WDW QSI  
 SSB 2  
 LB 0.00 Hz  
 GB 0

2D NMR plot parameters

CX2 15.00 cm  
 CX1 15.00 cm  
 F2PLO 11.001 ppm  
 F2LO 8798.73 Hz  
 F2PHI 5.595 ppm  
 F2HI 4474.57 Hz  
 F1PLO 11.000 ppm  
 F1LO 8797.87 Hz  
 F1PHI 5.600 ppm  
 F1HI 4478.92 Hz  
 F2PPMCM 0.36043 ppm/cm  
 F2HZCM 288.27753 Hz/cm  
 F1PPMCM 0.36000 ppm/cm  
 F1HZCM 287.93030 Hz/cm

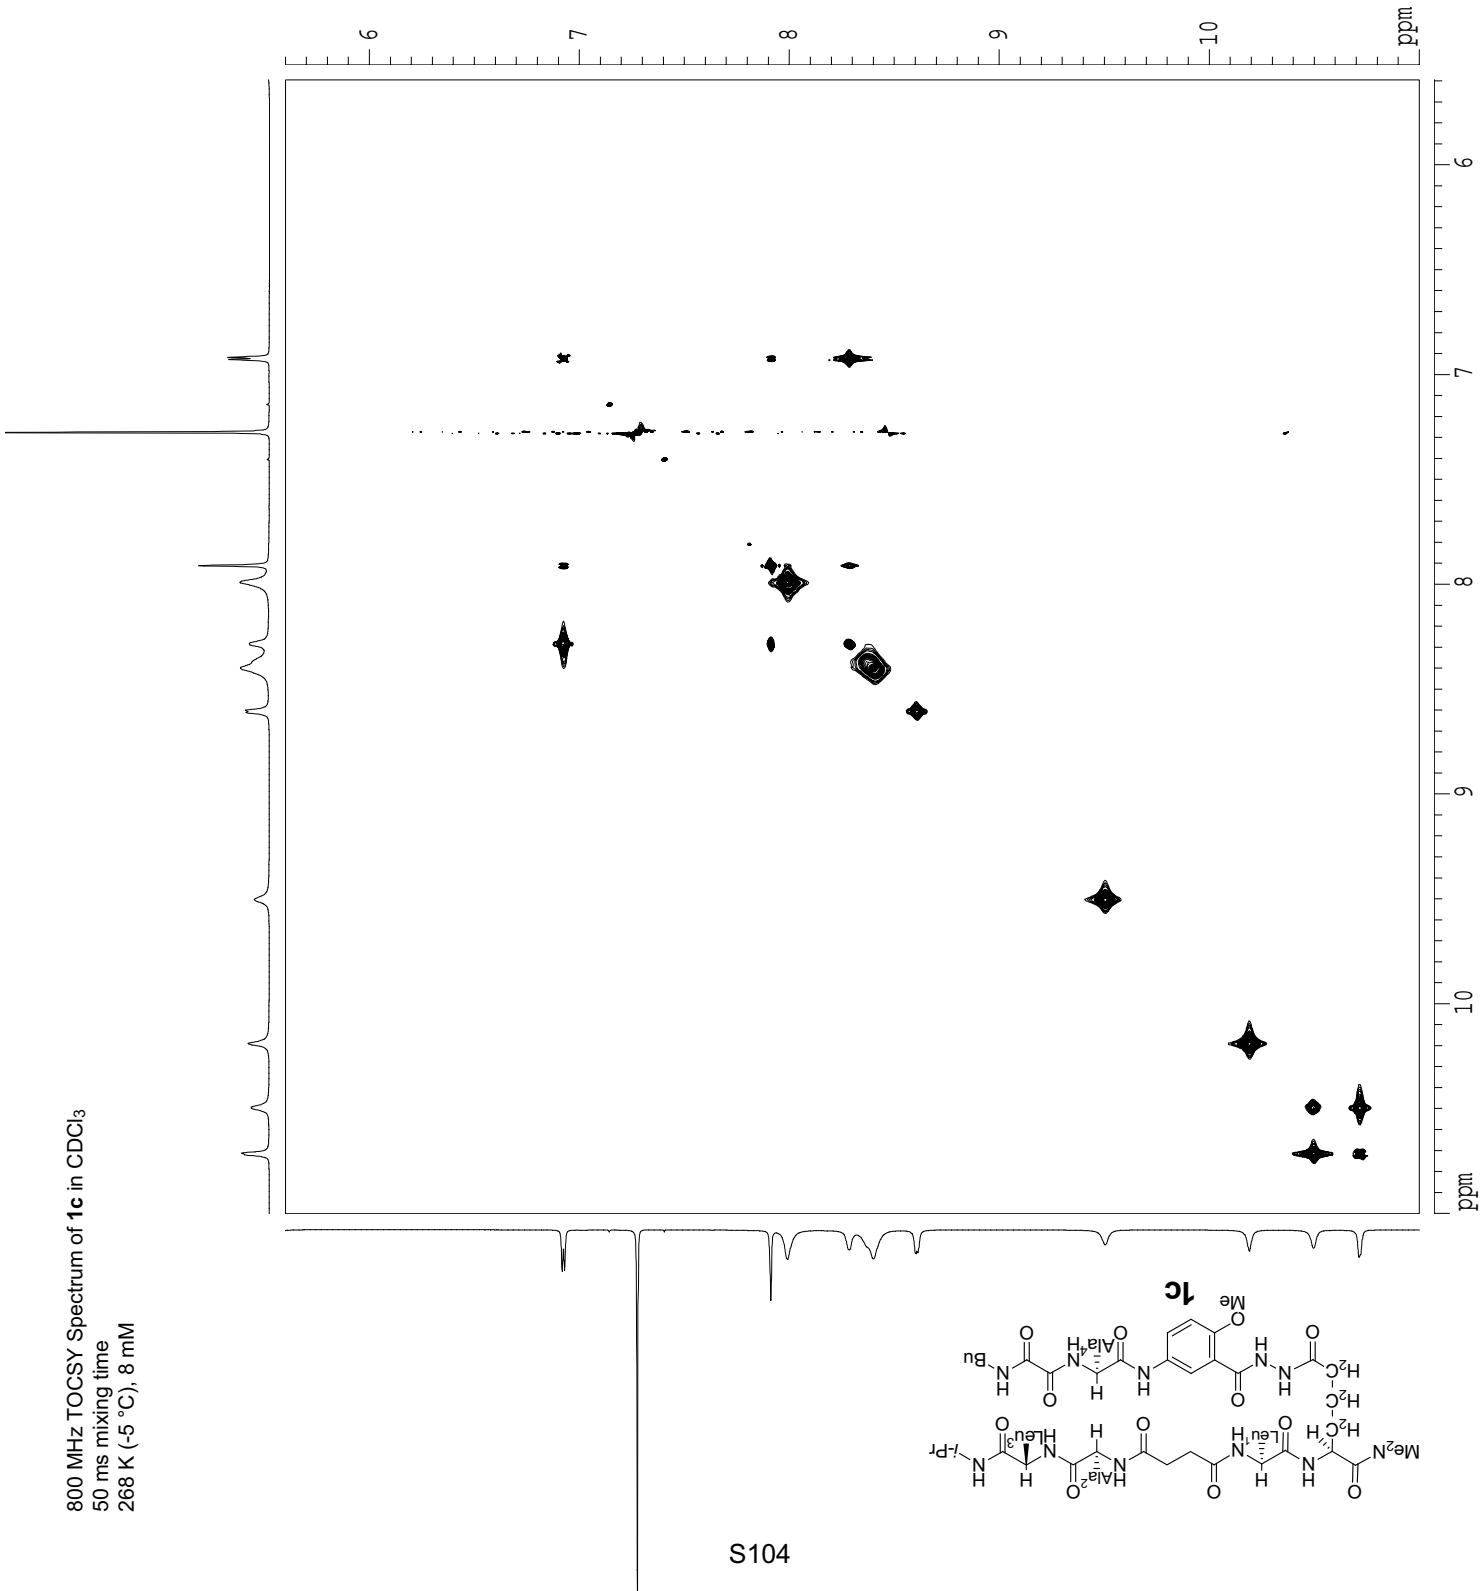

800 MHz TOCSY Spectrum of **1c** in CDCl<sub>3</sub>  
 50 ms mixing time  
 268 K (-5 °C), 8 mM



Current Data Parameters  
 USER slevin  
 NAME SL-7-213-800-H  
 EXPNO 3  
 PROCNO 1

F2 - Acquisition Parameters  
 Date\_ 20070122  
 Time 0.00  
 INSTRUM varian  
 PROBHD 40:5mmBroadban  
 PULPROG wgtocpsy\_bn  
 TD 4096  
 SOLVENT CDCl3  
 NS 16  
 DS 64  
 SWH 11001.101 Hz  
 FIDRES 2.685816 Hz  
 AQ 0.1862132 sec  
 RG 287.4  
 DW 45.450 usec  
 DE 6.00 usec  
 TE 268.5 K

F1 - Acquisition parameters  
 ND0 1  
 TD 1024  
 SF01 799.8107 MHz  
 FIDRES 10.743262 Hz  
 SW 13.755 ppm  
 FMODE undefined

F2 - Processing parameters  
 SI 2048  
 SF 799.8064126 MHz  
 WDW QSI  
 SSB 2  
 LB 0.00 Hz  
 GB 0  
 PC 1.40

F1 - Processing parameters  
 SI 2048  
 MC2 States  
 SF 799.8064126 MHz  
 WDW QSI  
 SSB 2  
 LB 0.00 Hz  
 GB 0

2D NMR plot parameters  
 CX2 15.00 cm  
 CX1 15.00 cm  
 F2PLO 5.600 ppm  
 F2LO 4478.92 Hz  
 F2PHI -0.100 ppm  
 F2HI -79.98 Hz  
 F1PLO 11.001 ppm  
 F1LO 8798.73 Hz  
 F1PHI 5.595 ppm  
 F1HI 4474.57 Hz  
 F2PWCW 0.38000 ppm/cm  
 F2HZCW 303.92645 Hz/cm  
 F1PWCW 0.36043 ppm/cm  
 F1HZCW 288.27753 Hz/cm

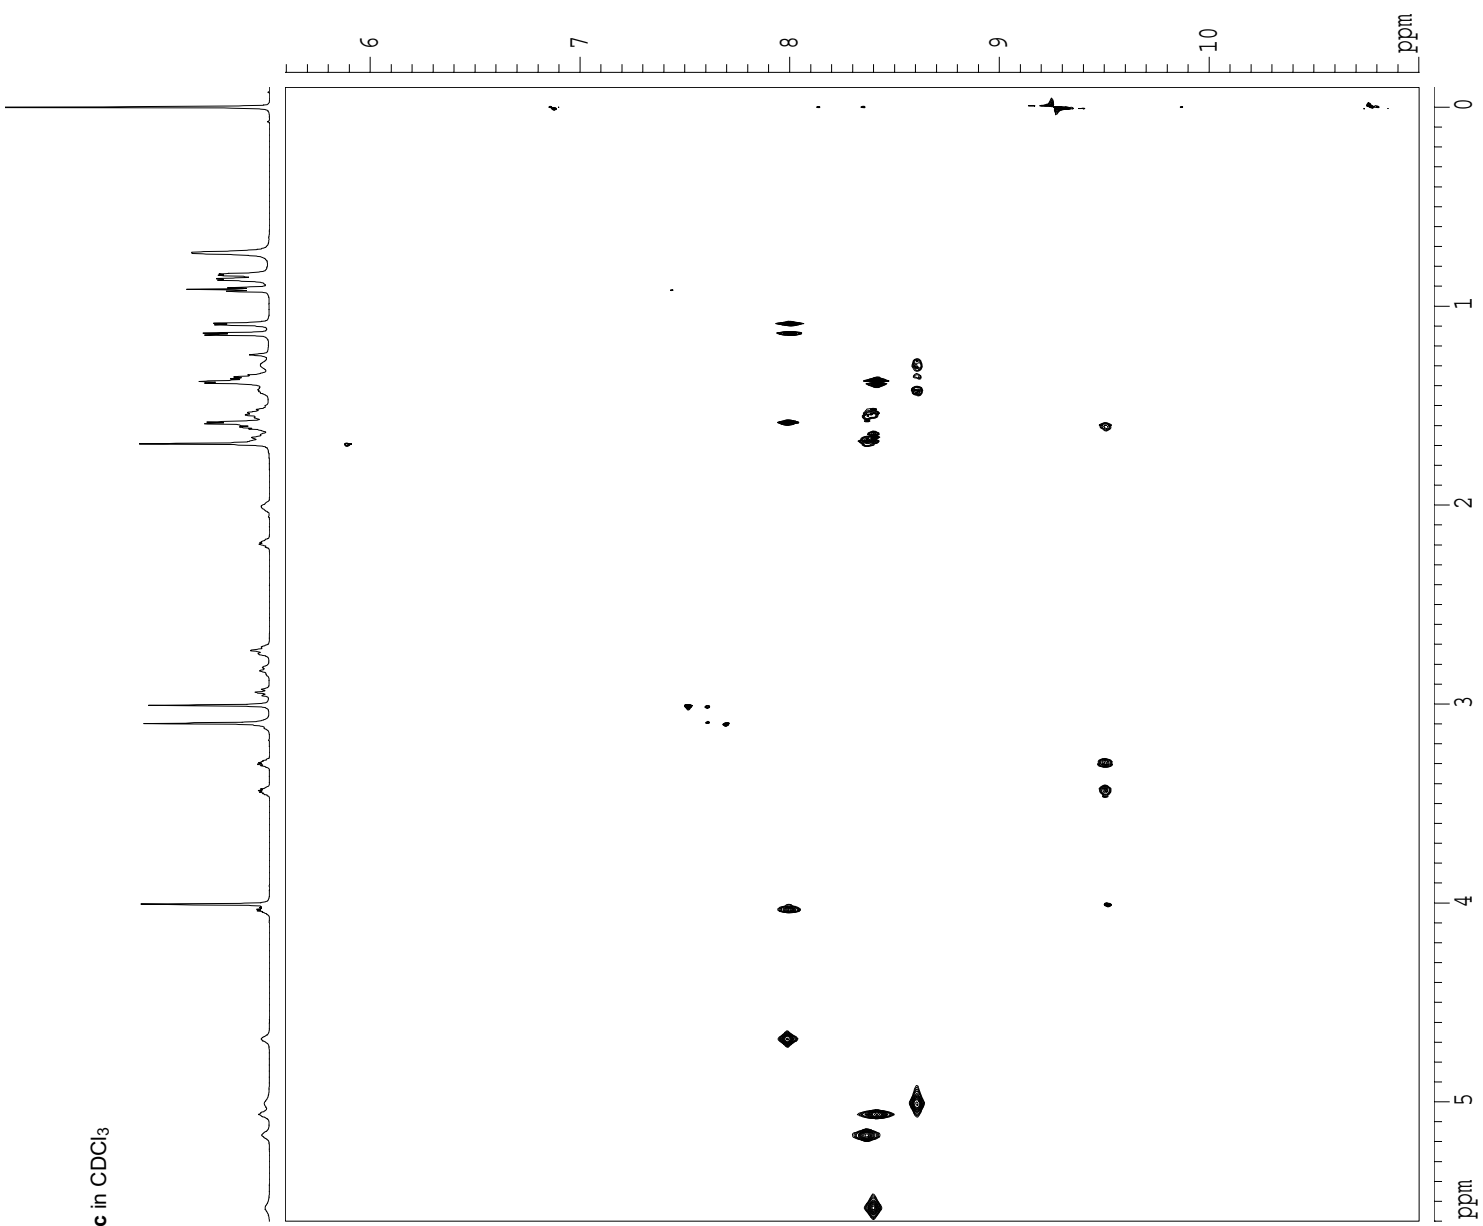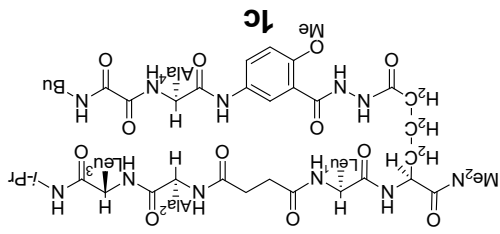

800 MHz TOCSY Spectrum of **1c** in CDCl<sub>3</sub>  
 50 ms mixing time  
 268 K (-5 °C), 8 mm



Supporting Information

S. Levin and J. S. Nowick

Current Data Parameters  
 USER slevin  
 NAME SL-7-213-800-H  
 EXPNO 4  
 PROCNO 1

F2 - Acquisition Parameters  
 Date\_ 20070122  
 Time 0:00  
 INSTRUM varian  
 PROBHD 40:5mmbroadban  
 PULPROG noesy2o\_pfg\_800\_pln  
 TD 4096

SOLVENT CDCl3  
 NS 16  
 DS 64  
 SWH 11001.101 Hz  
 FIDRES 2.685816 Hz  
 AQ 0.1862132 sec  
 RG 128  
 DW 45.450 usec  
 DE 6.00 usec  
 TE 268.5 K

F1 - Acquisition Parameters  
 ND0 1  
 TD 1024  
 SF01 799.8107 MHz  
 FIDRES 10.743262 Hz  
 SW 13.755 ppm  
 F1MODE undefined

F2 - Processing parameters  
 SI 2048  
 SF 799.8064140 MHz  
 WDM QSINE  
 SSB 2  
 LB 0.00 Hz  
 GB 0  
 PC 1.40

F1 - Processing parameters  
 SI 1024  
 MC2 States  
 SF 799.8064140 MHz  
 WDM QSINE  
 SSB 2  
 LB 0.00 Hz  
 GB 0

2D NMR plot parameters  
 CX2 15.00 cm  
 CX1 15.00 cm  
 F2PLO 11.001 ppm  
 F2LO 8798.73 Hz  
 F2PHI -0.101 ppm  
 F2HI -80.57 Hz  
 F1PLO 11.008 ppm  
 F1LO 8804.10 Hz  
 F1PHI -0.101 ppm  
 F1HI -80.57 Hz  
 F2PFCM 0.74012 ppm/cm  
 F2H2CM 591.95367 Hz/cm  
 F1PFCM 0.74057 ppm/cm  
 F1H2CM 592.31183 Hz/cm

800 MHz NOESY Spectrum of **1c** in CDCl<sub>3</sub>  
 400 ms mixing time  
 268 K (-5 °C), 8 mM

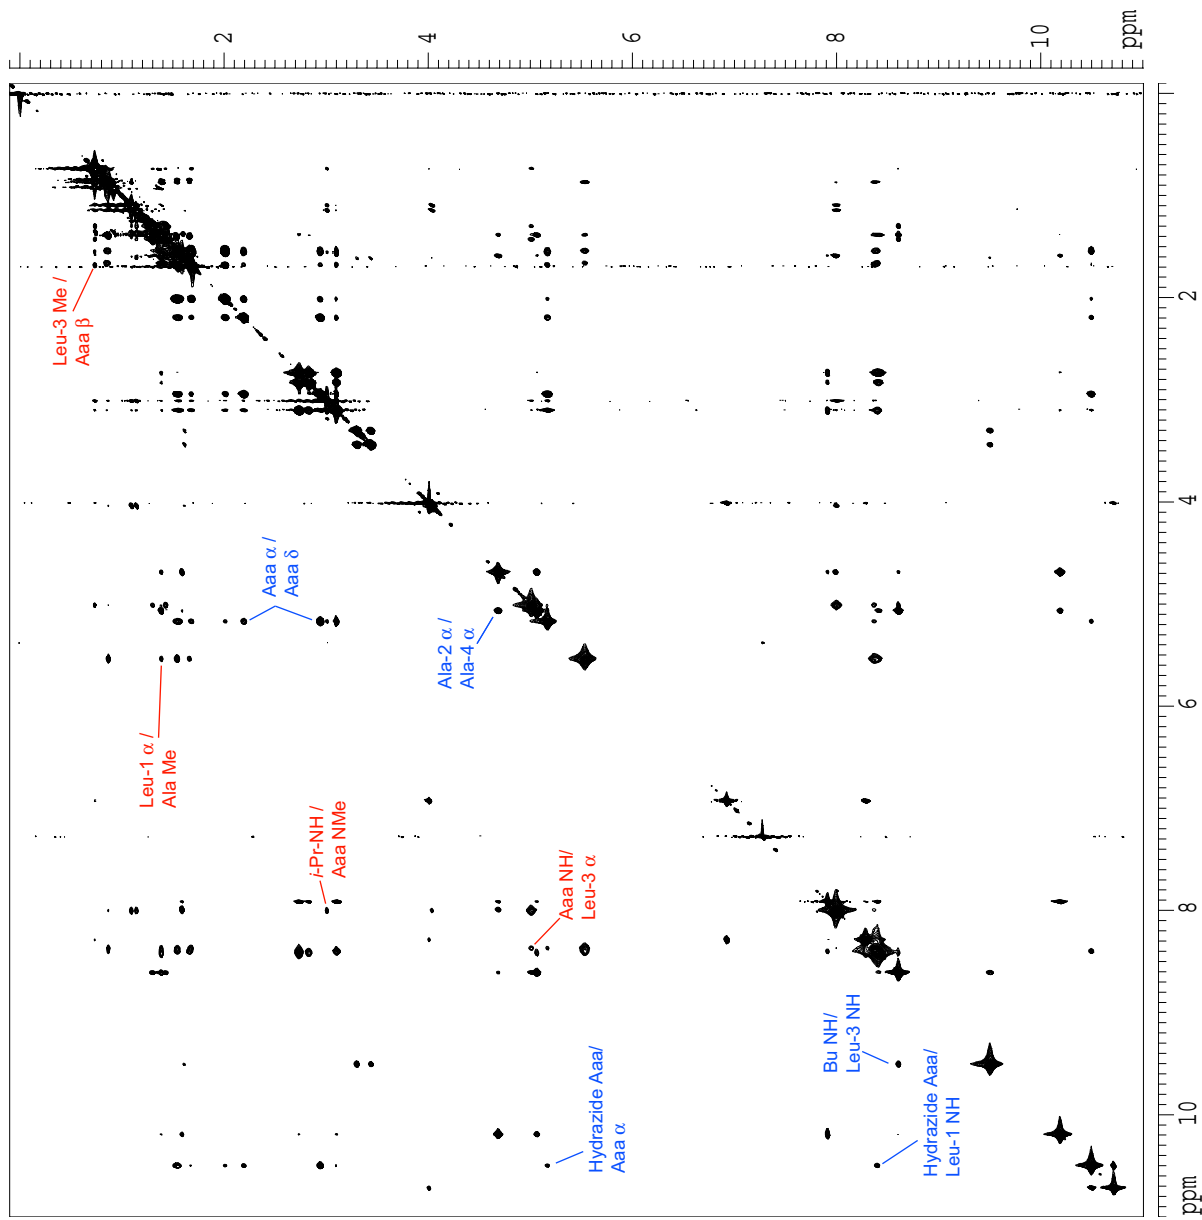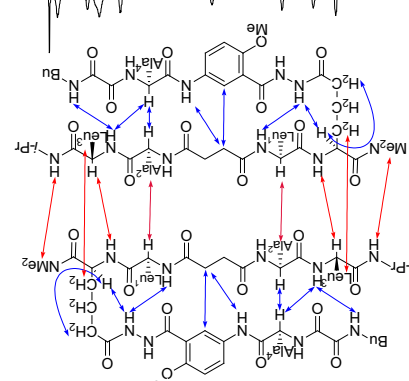

Current Data Parameters  
 USER slevin  
 NAME SL-7-213-800-H  
 EXPNO 4  
 PROCNO 1

## F2 - Acquisition Parameters

Date\_ 20070122  
 Time 0.00  
 INSTRUM varian  
 PROBHD 40:5mmbroadban  
 PULPROG noesyh2o\_pfg\_800\_pln  
 TD 4096  
 SOLVENT CDCl3  
 NS 16  
 DS 64  
 SWH 11001.101 Hz  
 FIDRES 2.685816 Hz  
 AQ 0.1862132 sec  
 RG 128  
 DW 45.450 usec  
 DE 6.00 usec  
 TE 288.5 K

## F1 - Acquisition Parameters

ND0 1  
 TD 1024  
 SF01 799.8107 MHz  
 FIDRES 10.743262 Hz  
 SW 13.755 ppm  
 FwMODE undefined

## F2 - Processing parameters

SI 2048  
 SF 799.8064140 MHz  
 WDM QSIGNE  
 SSB 2  
 LB 0.00 Hz  
 GB 0  
 PC 1.40

## F1 - Processing parameters

SI 1024  
 MC2 States  
 SF 799.8064140 MHz  
 WDM QSIGNE  
 SSB 2  
 LB 0.00 Hz  
 GB 0

## 2D NMR plot parameters

CX2 15.00 cm  
 CX1 15.00 cm  
 F2PLO 5.600 ppm  
 F2LO 4478.92 Hz  
 F2PHI -0.100 ppm  
 F2HI -79.98 Hz  
 F1PLO 5.600 ppm  
 F1LO 4478.92 Hz  
 F1PHI -0.100 ppm  
 F1HI -79.98 Hz  
 F2PPMCM 0.38000 ppm/cm  
 F2HZCM 303.92645 Hz/cm  
 F1PPMCM 0.38000 ppm/cm  
 F1HZCM 303.92645 Hz/cm

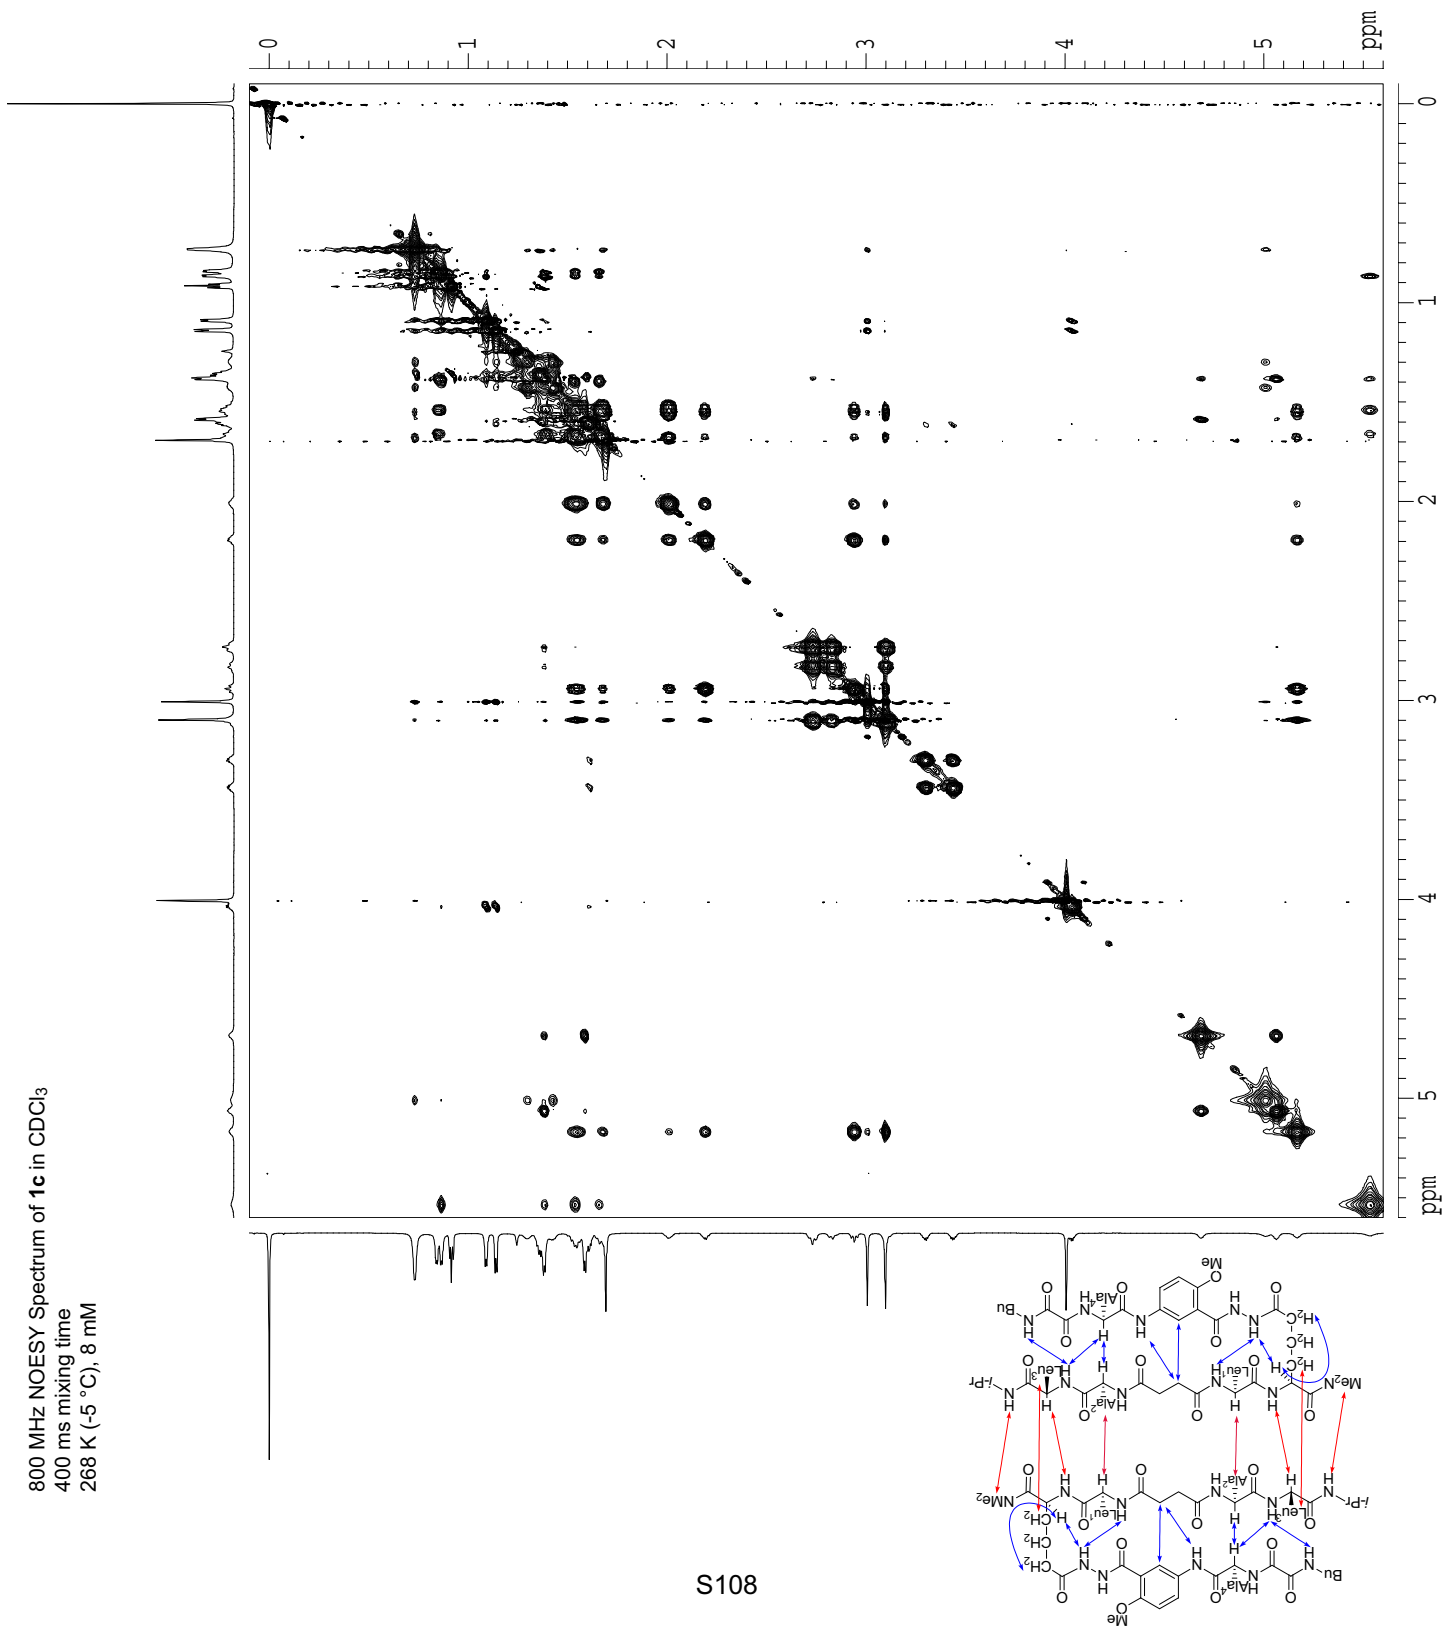

Supporting Information

Current Data Parameters  
 USER slevin  
 NAME SL-7-213-800-H  
 EXPNO 4  
 PROCNO 1

F2 - Acquisition Parameters  
 Date\_ 20070122  
 Time\_ 0.00  
 INSTRUM varian  
 PROBHD 40:5mm broadband  
 PULPROG noesyh2o\_pfg\_800\_pln  
 TD 4096  
 SOLVENT CDCl3  
 NS 16  
 DS 64  
 SWH 11001.101 Hz  
 FIDRES 2.685816 Hz  
 AQ 0.1862132 sec  
 RG 128  
 DW 45.450 usec  
 DE 6.00 usec  
 TE 268.5 K

F1 - Acquisition Parameters  
 ND0 1  
 TD 1024  
 SF01 799.8107 MHz  
 FIDRES 10.743262 Hz  
 SW 13.755 ppm  
 FMODE undefined

F2 - Processing parameters  
 SI 2048  
 SF 799.8064140 MHz  
 WDW QSI  
 SSB 2  
 LB 0.00 Hz  
 GB 0  
 PC 1.40

F1 - Processing parameters  
 SI 1024  
 MC2 States  
 SF 799.8064140 MHz  
 WDW QSI  
 SSB 2  
 LB 0.00 Hz  
 GB 0

2D NMR plot parameters  
 CX2 15.00 cm  
 CX1 15.00 cm  
 F2PLO 11.000 ppm  
 F2LO 8797.87 Hz  
 F2PHI 5.600 ppm  
 F2HI 4478.92 Hz  
 F1PLO 5.606 ppm  
 F1LO 4483.97 Hz  
 F1PHI -0.102 ppm  
 F1HI -81.92 Hz  
 F2PEMCM 0.36000 ppm/cm  
 F2HZCM 287.93030 Hz/cm  
 F1PEMCM 0.38058 ppm/cm  
 F1HZCM 304.39243 Hz/cm

800 MHz NOESY Spectrum of **1c** in CDCl<sub>3</sub>  
 400 ms mixing time  
 268 K (-5 °C), 8 mM

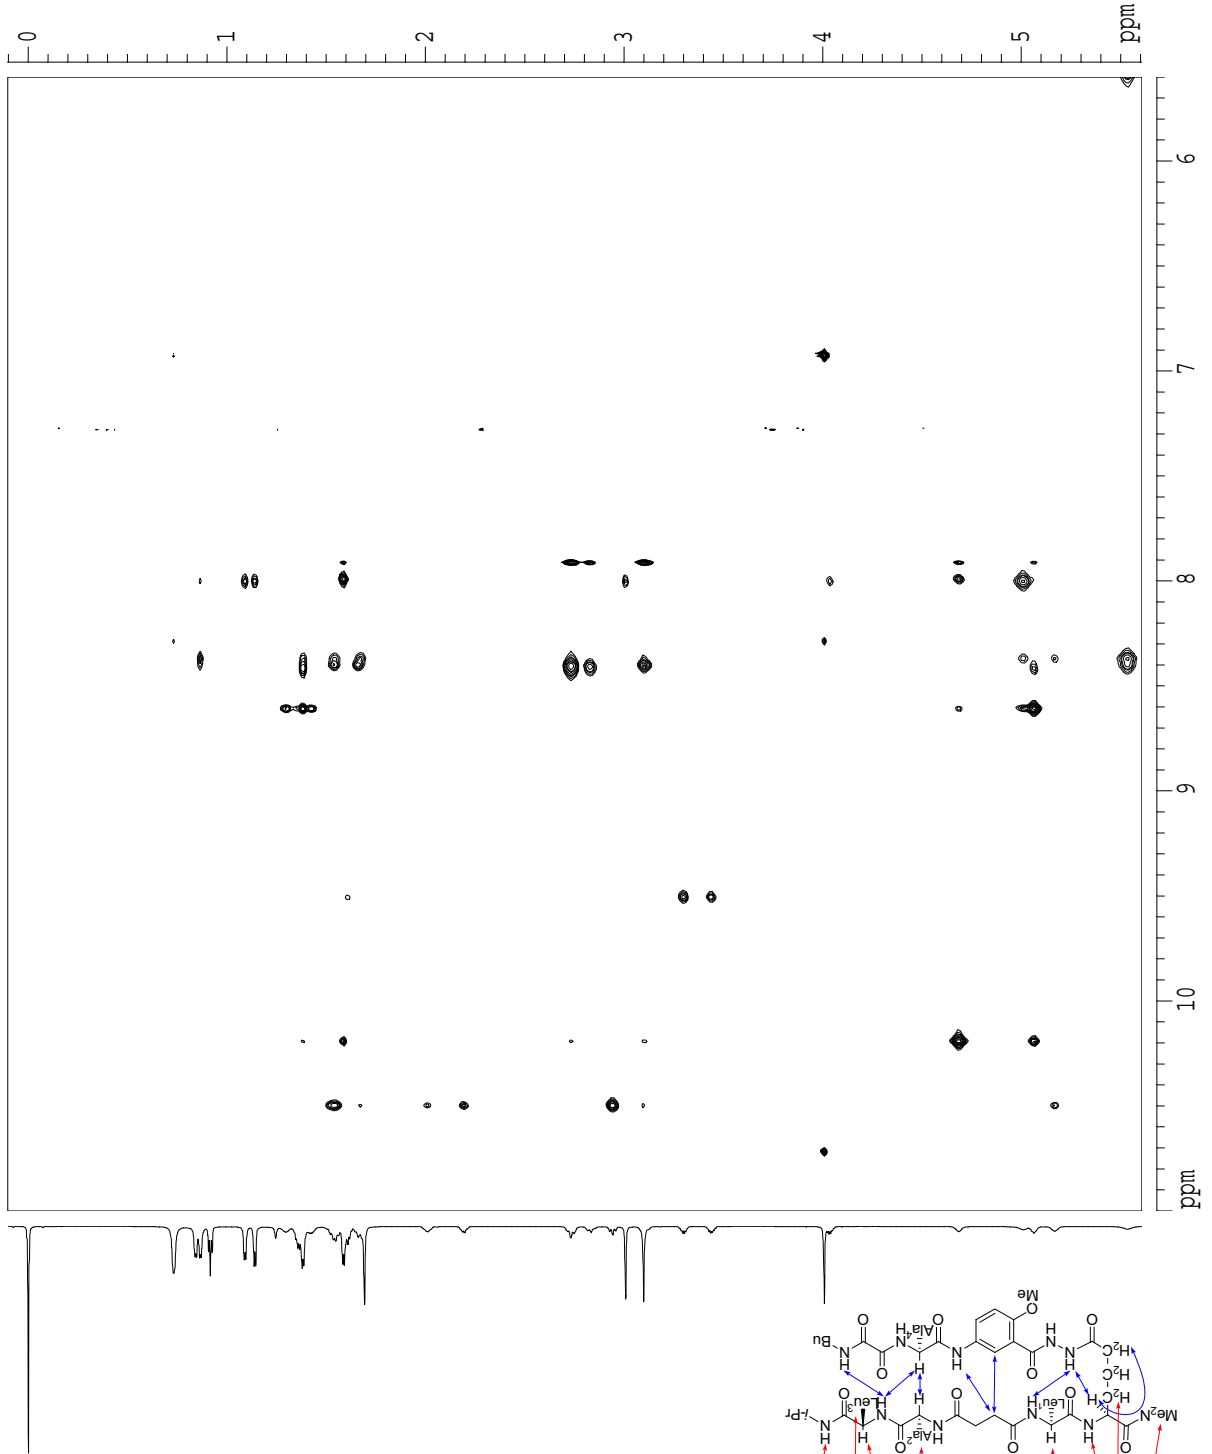

Current Data Parameters  
 USER slevin  
 NAME SL-7-213-800-H  
 EXPNO 4  
 PROCNO 1

## F2 - Acquisition Parameters

Date 20070122  
 Time 0.00  
 INSTRUM varian  
 PROBHD 40:5mmbroadban  
 PULPROG noesyh2o\_pfg\_800\_pln  
 TD 4096  
 SOLVENT CDCl3  
 NS 16  
 DS 64  
 SWH 11001.101 Hz  
 FIDRES 2.685816 Hz  
 AQ 0.1862132 sec  
 RG 128  
 DW 45.450 usec  
 DE 6.00 usec  
 TE 268.5 K

## F1 - Acquisition Parameters

ND0 1  
 TD 1024  
 SF01 799.8107 MHz  
 FIDRES 10.743262 Hz  
 SW 13.755 ppm  
 F1MODE undefined

## F2 - Processing parameters

SI 2048  
 SF 799.8064140 MHz  
 WDM QSIINE  
 SSB 2  
 LB 0.00 Hz  
 GB 0  
 PC 1.40

## F1 - Processing parameters

SI 1024  
 MC2 States  
 SF 799.8064140 MHz  
 WDM QSIINE  
 SSB 2  
 LB 0.00 Hz  
 GB 0

## 2D NMR plot parameters

CX2 15.00 cm  
 CX1 15.00 cm  
 F2PLO 11.006 ppm  
 F2LO 8802.76 Hz  
 F2PHI 5.600 ppm  
 F2HI 4478.60 Hz  
 F1PLO 11.000 ppm  
 F1LO 8797.87 Hz  
 F1PHI 5.600 ppm  
 F1HI 4478.92 Hz  
 F2PPMCM 0.36043 ppm/cm  
 F2HZCM 288.27753 Hz/cm  
 F1PPMCM 0.36000 ppm/cm  
 F1HZCM 287.93030 Hz/cm

800 MHz NOESY Spectrum of **1c** in CDCl<sub>3</sub>  
 400 ms mixing time  
 268 K (-5 °C), 8 mM

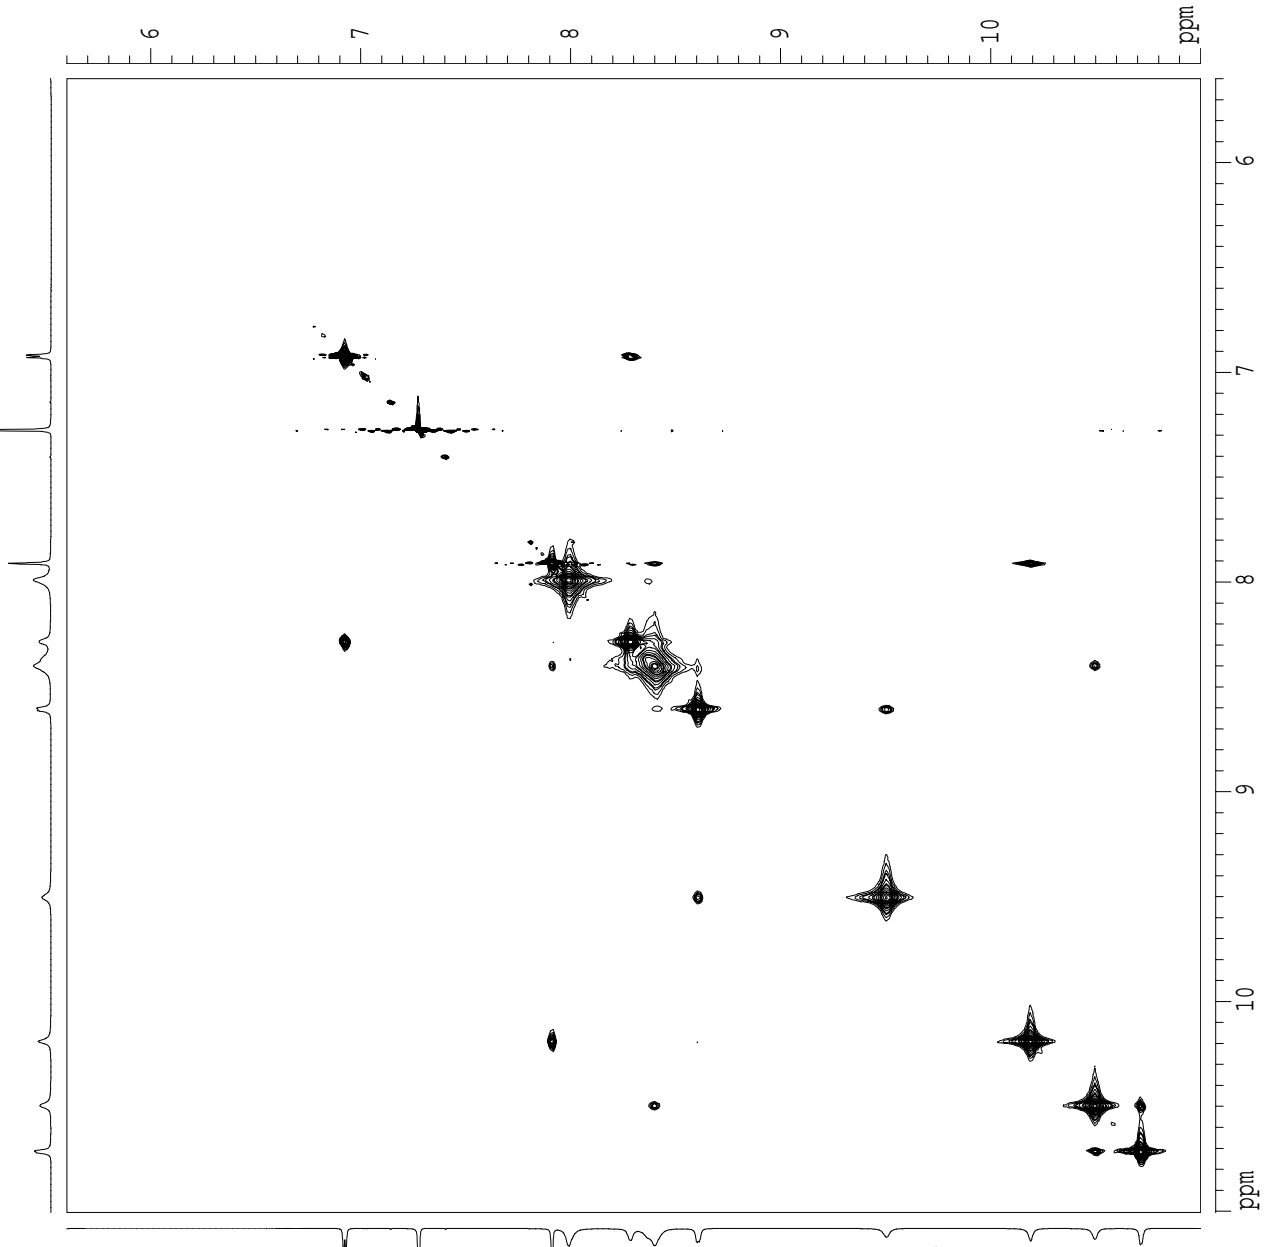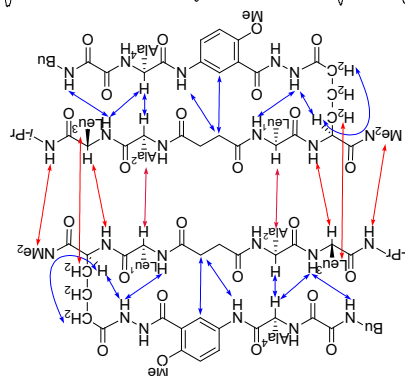

Supporting Information

S. Levin and J. S. Nowick

Current Data Parameters  
 USER slevin  
 NAME SL-7-213-800-H  
 EXPNO 4  
 PROCNO 1

F2 - Acquisition Parameters

Date\_ 20070122  
 Time 0.00  
 INSTRUM varian  
 PROBDH 40:5mmrbroadban  
 PULPROG noesyh2o\_pfg\_800\_pln  
 TD 4096  
 SOLVENT CDCl3  
 NS 16  
 DS 64  
 SMH 11001.101 Hz  
 FIDRES 2.685816 Hz  
 AQ 0.1862132 sec  
 RG 128  
 DW 45.450 usec  
 DE 6.00 usec  
 TE 268.5 K

F1 - Acquisition Parameters

ND0 1  
 TD 1024  
 SFO1 799.8107 MHz  
 FIDRES 10.743262 Hz  
 SW 13.755 ppm  
 FmMODE undefined

F2 - Processing Parameters

SI 2048  
 SF 799.8064140 MHz  
 WDW QSINE  
 SSB 2  
 LB 0.00 Hz  
 GB 0  
 PC 1.40

F1 - Processing Parameters

SI 1024  
 MC2 States  
 SF 799.8064140 MHz  
 WDW QSINE  
 SSB 2  
 LB 0.00 Hz  
 GB 0

2D NMR plot parameters

CX2 15.00 cm  
 CX1 15.00 cm  
 F2PLO 5.600 ppm  
 F2LO 4478.92 Hz  
 F2PHI -0.100 ppm  
 F2HI -79.98 Hz  
 F1PLO 11.006 ppm  
 F1LO 8802.76 Hz  
 F1PHI 5.593 ppm  
 F1HI 4473.23 Hz  
 F2PPMCM 0.38000 ppm/cm  
 F2HZCM 303.92645 Hz/cm  
 F1PPMCM 0.36088 ppm/cm  
 F1HZCM 288.63562 Hz/cm

800 MHz NOESY Spectrum of **1c** in CDCl<sub>3</sub>  
 400 ms mixing time  
 268 K (-5 °C), 8 mM

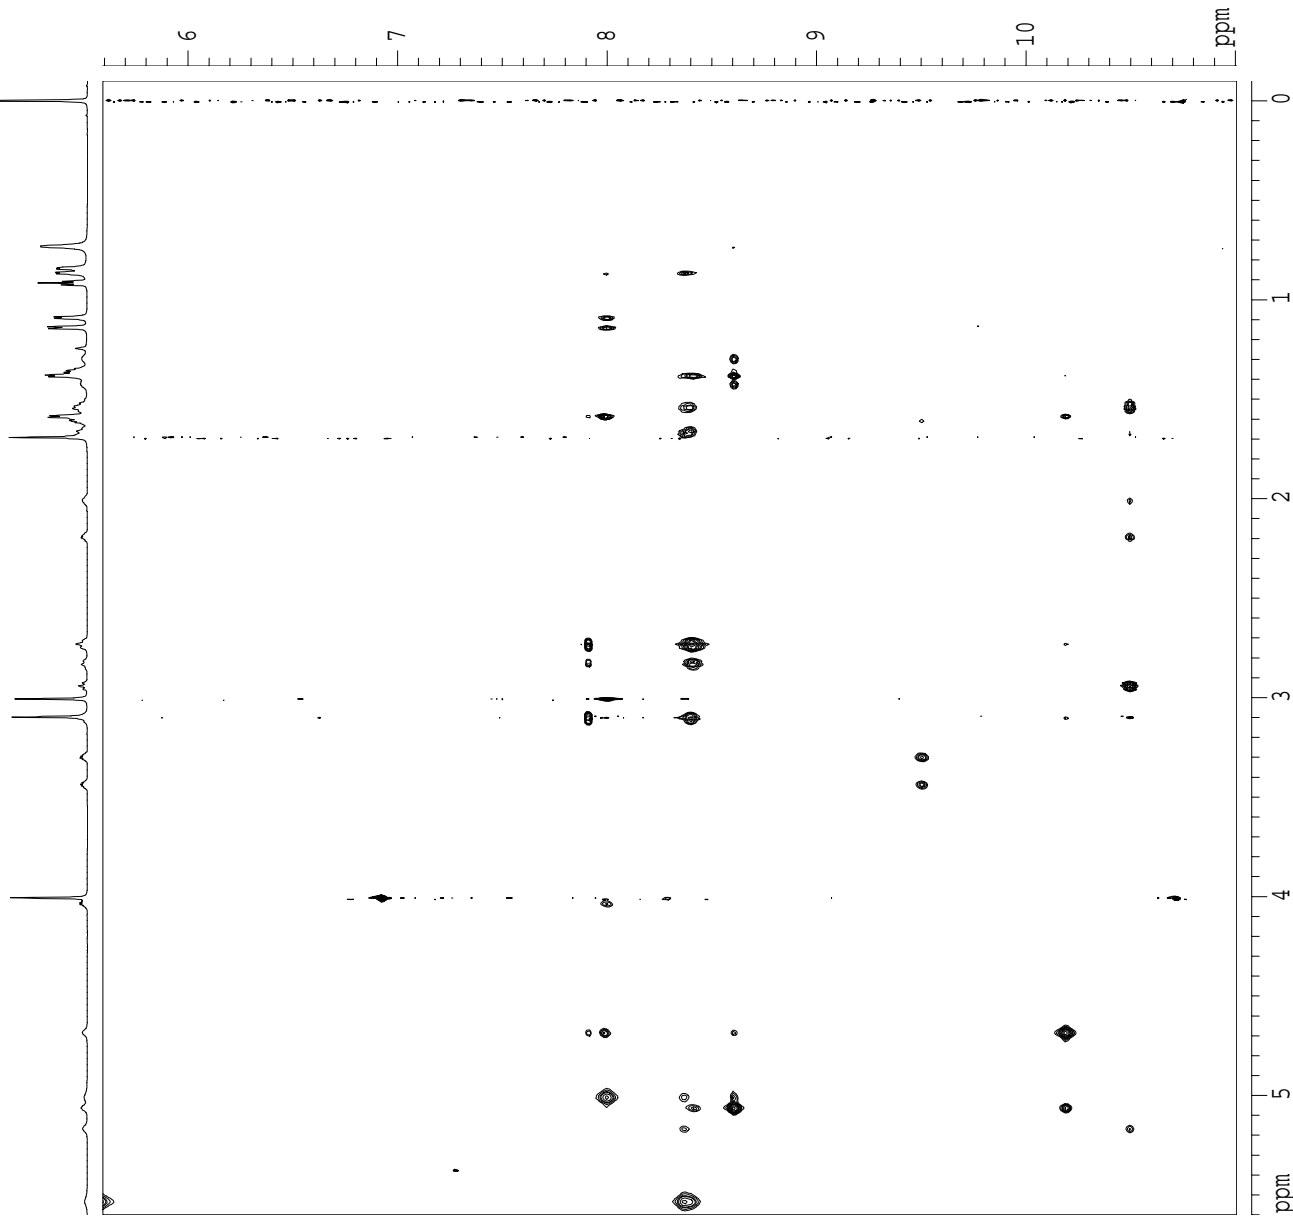

Current Data Parameters  
 USER slewin  
 NAME SL-7-213-800-H  
 EXPNO 4  
 PROCNO 1

## F2 - Acquisition Parameters

Date\_ 20070122  
 Time 0.00  
 INSTRUM varian  
 PROBHD 40:5mmrbroadban  
 PULPROG noesyh2o\_pfg\_800\_pln  
 TD 4096  
 SOLVENT CDCl3  
 NS 16  
 DS 64  
 SWH 11001.101 Hz  
 FIDRES 2.685816 Hz  
 AQ 0.1862132 sec  
 RG 128  
 DW 45.450 usec  
 DE 6.00 usec  
 TE 268.5 K

## F1 - Acquisition Parameters

ND0 1  
 TD 1024  
 SFO1 799.8107 MHz  
 FIDRES 10.743262 Hz  
 SW 13.755 ppm  
 F1MODE undefined

## F2 - Processing parameters

SI 2048  
 SF 799.8064140 MHz  
 MDW QSINE  
 SSB 2  
 LB 0.00 Hz  
 GB 0  
 PC 1.40

## F1 - Processing parameters

SI 1024  
 MC2 States  
 SF 799.8064140 MHz  
 MDW QSINE  
 SSB 2  
 LB 0.00 Hz  
 GB 0

## 2D NMR plot parameters

CX2 15.00 cm  
 CX1 15.00 cm  
 F2PLO 5.579 ppm  
 F2LO 4462.48 Hz  
 F2PHI 4.646 ppm  
 F2HI 3715.83 Hz  
 F1PLO 1.724 ppm  
 F1LO 1379.17 Hz  
 F1PHI 0.690 ppm  
 F1HI 551.93 Hz  
 F2PPMCM 0.06224 ppm/cm  
 F2HZCM 49.77710 Hz/cm  
 F1PPMCM 0.06895 ppm/cm  
 F1HZCM 55.14874 Hz/cm

800 MHz NOESY Spectrum of **1c** in CDCl<sub>3</sub>  
 400 ms mixing time  
 268 K (-5 °C), 8 mM

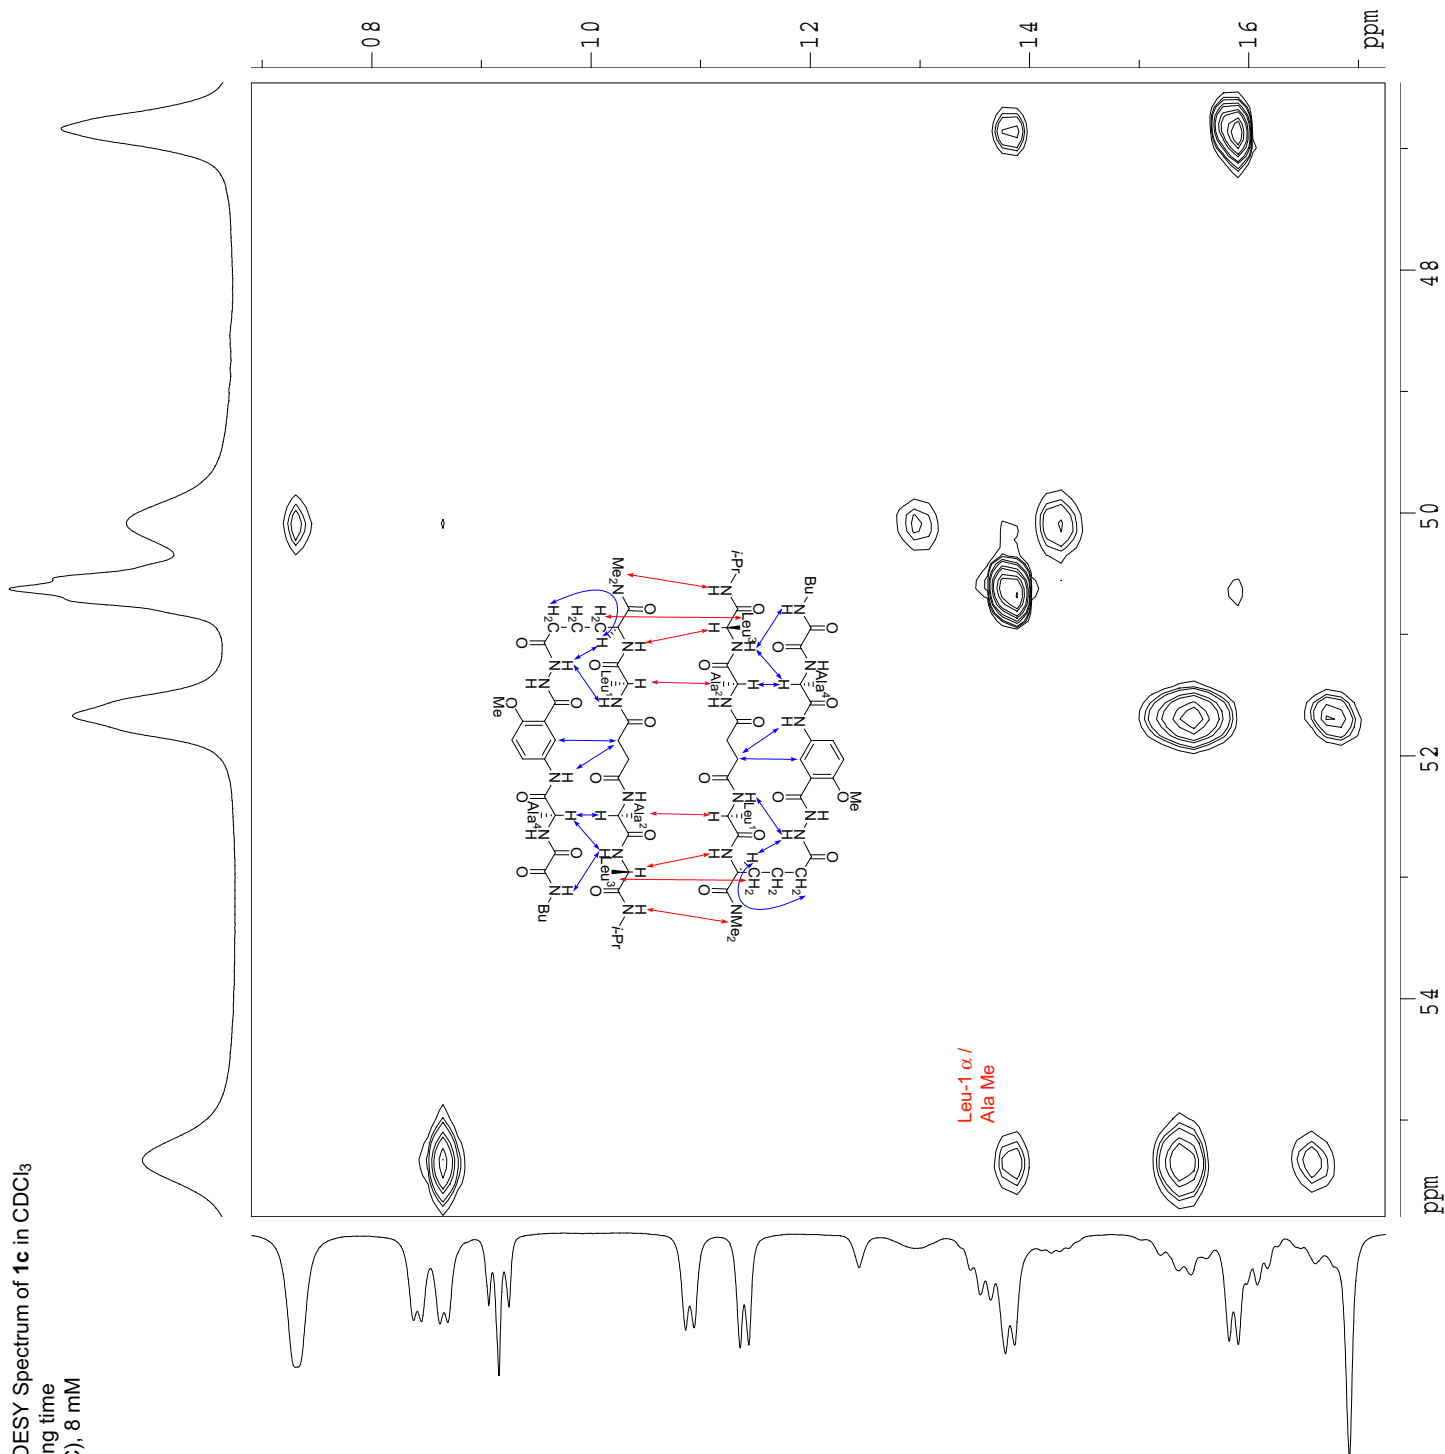



Supporting Information

Current Data Parameters  
 USER slewin  
 NAME SL-7-213-800-H  
 EXPNO 4  
 PROCNO 1

F2 - Acquisition Parameters

Date\_ 20070122  
 Time\_ 0.00  
 INSTRUM varian  
 PROBHD 40:5mmBroadban  
 PULPROG noesyh2o\_pfg\_800\_pln  
 TD 4096  
 SOLVENT CDCl3  
 NS 16  
 DS 64  
 SWH 11001.101 Hz  
 FIDRES 2.685816 Hz  
 AQ 0.1862132 sec  
 RG 128  
 DW 45.450 usec  
 DE 6.00 usec  
 TE 288.5 K

F1 - Acquisition Parameters

ND0 1  
 TD 1024  
 SF01 799.8107 MHz  
 FIDRES 10.743262 Hz  
 SW 13.755 ppm  
 FMODE undefined

F2 - Processing parameters

SI 2048  
 SF 799.8064140 MHz  
 WDW QSIGNE  
 SSB 2  
 LB 0.00 Hz  
 GB 0  
 PC 1.40

F1 - Processing parameters

SI 1024  
 MC2 States  
 SF 799.8064140 MHz  
 WDW QSIGNE  
 SSB 2  
 LB 0.00 Hz  
 GB 0

2D NMR plot parameters

CX2 15.00 cm  
 CX1 15.00 cm  
 F2PLO 8.803 ppm  
 F2LO 7040.86 Hz  
 F2PHI 7.762 ppm  
 F2HI 6208.26 Hz  
 F1PLO 5.620 ppm  
 F1LO 4494.71 Hz  
 F1PHI 0.609 ppm  
 F1HI 487.48 Hz  
 F2PMCM 0.06940 ppm/cm  
 F2HZCM 55.50684 Hz/cm  
 F1PMCM 0.33402 ppm/cm  
 F1HZCM 267.14911 Hz/cm

S. Levin and J. S. Nowick

800 MHz NOESY Spectrum of **1c** in CDCl<sub>3</sub>  
 400 ms mixing time  
 268 K (-5 °C), 8 mM

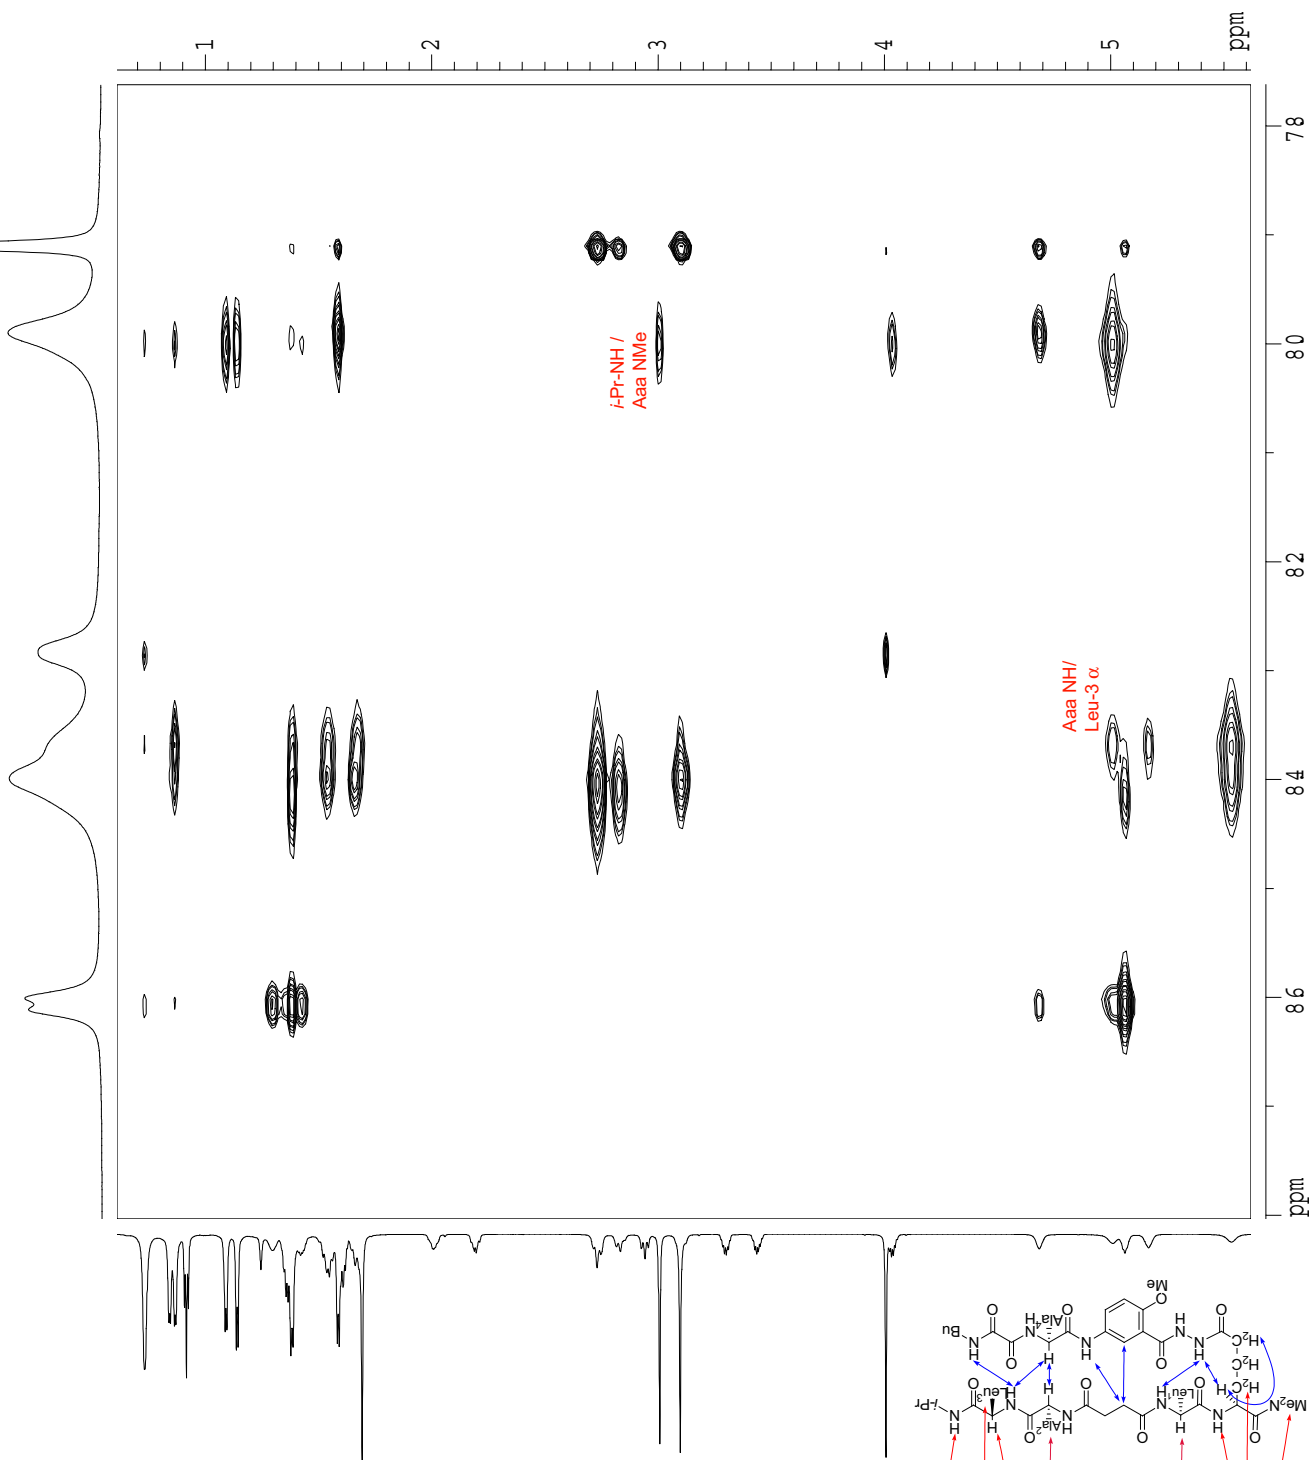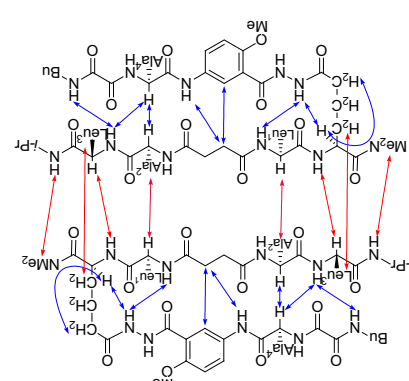

Current Data Parameters  
 USER slevin  
 NAME SL-7-213-800-H  
 EXPNO 4  
 PROCNO 1

F2 - Acquisition Parameters  
 Date\_ 20070122  
 Time 0.00  
 INSTRUM varian  
 PROBHD 40:5mmbrdabban  
 PULPROG noesyh2o\_pfg\_800\_p1n  
 TD 4096

SOLVENT CDCl3  
 NS 16  
 DS 64  
 SWH 11001.101 Hz  
 FIDRES 2.685816 Hz  
 AQ 0.1862132 sec  
 RG 128  
 DW 45.450 usec  
 DE 6.00 usec  
 TE 268.5 K

F1 - Acquisition parameters  
 NDO 1  
 TD 1024  
 SFO1 799.8107 MHz  
 FIDRES 10.743262 Hz  
 SW 13.755 ppm  
 FMODE undefined

F2 - Processing parameters  
 SI 2048  
 SF 799.8064140 MHz  
 WDW QSINE  
 SSB 2  
 LB 0.00 Hz  
 GB 0  
 PC 1.40

F1 - Processing parameters  
 SI 1024  
 MC2 States  
 SF 799.8064140 MHz  
 WDW QSINE  
 SSB 2  
 LB 0.00 Hz  
 GB 0

2D NMR plot parameters

CX2 15.00 cm  
 CX1 15.00 cm  
 F2PLO 1.820 ppm  
 F2LO 1455.71 Hz  
 F2PHI 0.551 ppm  
 F2HI 440.47 Hz  
 F1PLO 1.807 ppm  
 F1LO 1444.97 Hz  
 F1PHI 0.531 ppm  
 F1HI 424.36 Hz  
 F2PPMCM 0.08462 ppm/cm  
 F2HZCM 67.68256 Hz/cm  
 F1PPMCM 0.08507 ppm/cm  
 F1HZCM 68.04066 Hz/cm

800 MHz NOESY Spectrum of **1c** in CDCl<sub>3</sub>  
 400 ms mixing time  
 268 K (-5 °C), 8 mM

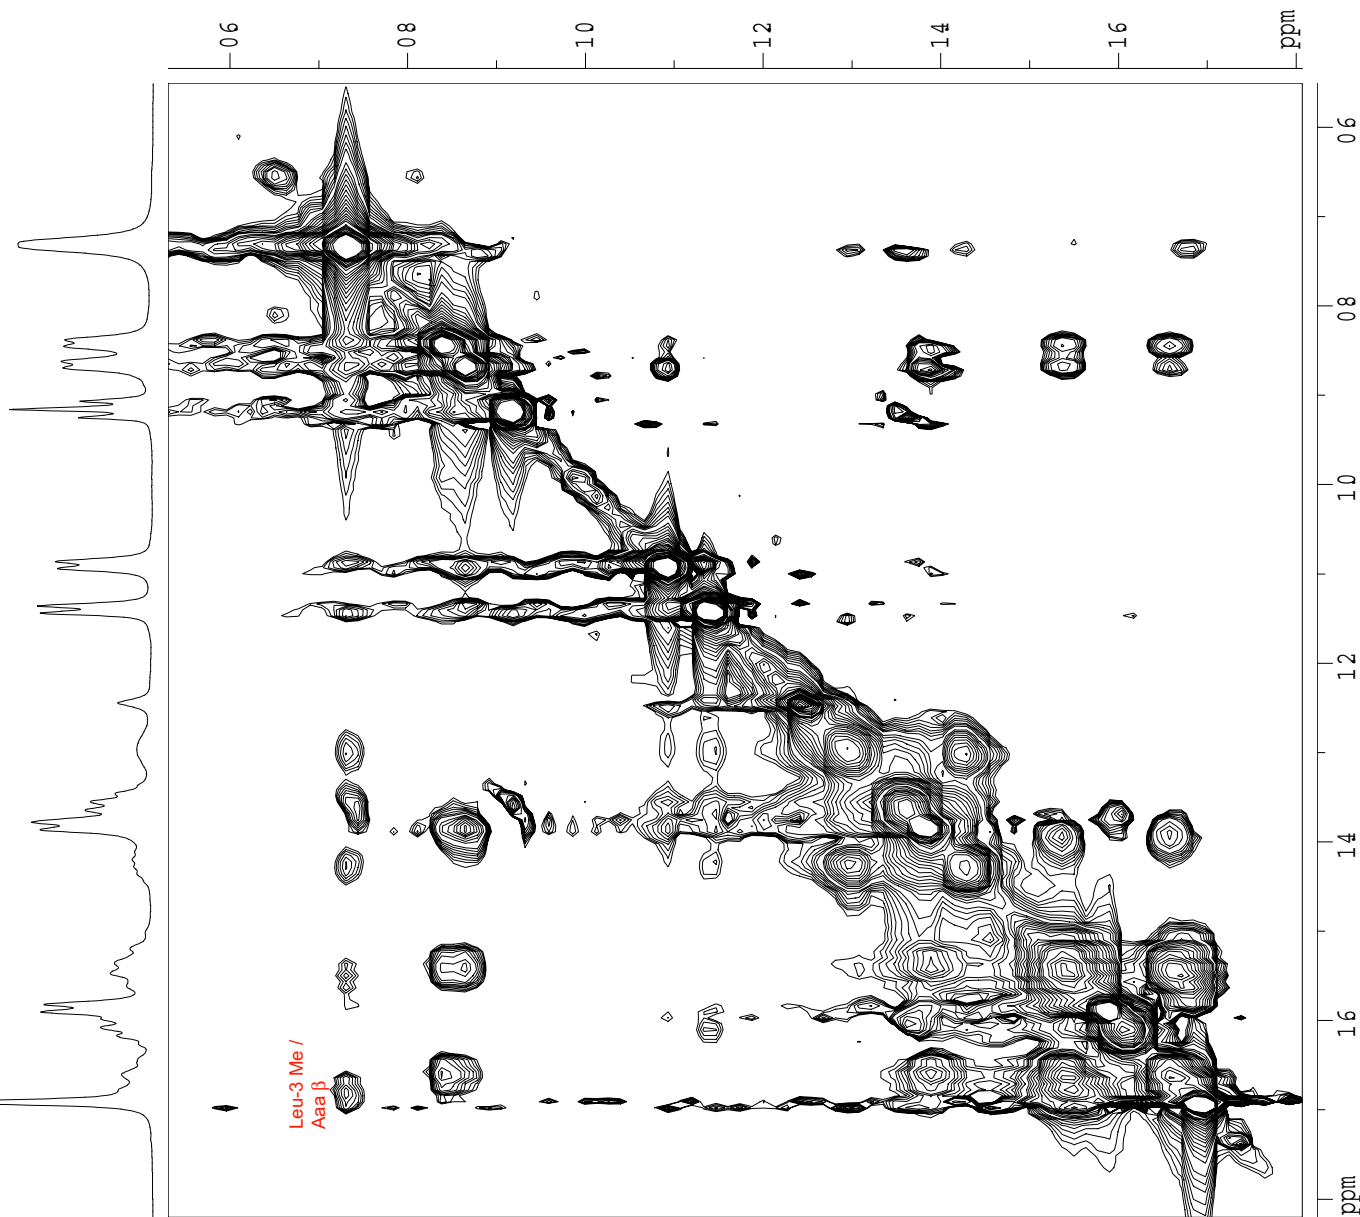

Spectroscopic DATA for the compound **1d**  
(20 mM, CDCl<sub>3</sub> 268K)

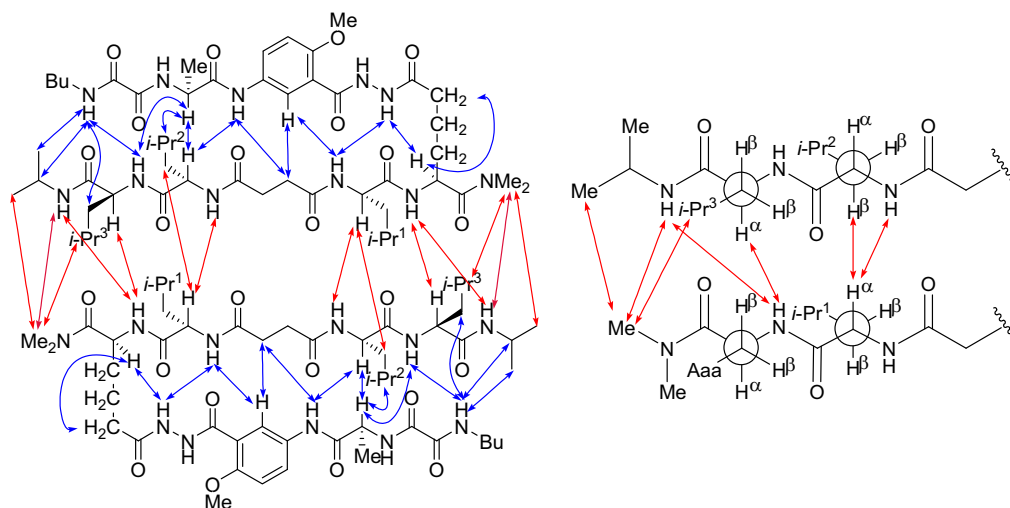

Key NOEs assigned as *intermolecular* are represented with red arrows  
Key NOEs assigned as *intramolecular* are represented with blue arrows

Key data for amino acids.

| Amino acid                        | H <sub>α</sub> Shift ppm | NH Shift ppm | <sup>3</sup> J <sub>NHα</sub> Hz |
|-----------------------------------|--------------------------|--------------|----------------------------------|
| Aaa                               | 5.16                     | 8.67         | 8.7                              |
| R <sub>1</sub> = Leu <sup>1</sup> | 5.54                     | 8.39         | 8.0                              |
| R <sub>2</sub> = Leu <sup>2</sup> | 4.94                     | 8.31         | 9.2                              |
| R <sub>3</sub> = Leu <sup>3</sup> | 4.97                     | 8.69         | 10.0                             |
| R <sub>4</sub> = Ala              | 4.79                     | 7.98         | 7.4                              |

Amino adipic acid (Aaa) δ proton resonances.

*pro-R*: 2.91 ppm, t, (*overlap*)

*pro-S*: 2.19 ppm, td, (*J*<sub>1</sub> = 11.5 Hz; *J*<sub>2</sub> = 7.0 Hz)

anisotropy = 0.72ppm

Key data for other NH protons.

| Proton          | NH Shift ppm | <i>J</i> Hz |
|-----------------|--------------|-------------|
| Ar-NH           | 10.20        | -           |
| Hydrazide Ar    | 10.57        | 7.4         |
| Hydrazide Aaa   | 10.43        | 7.4         |
| Bu-NH           | 9.62         | broad       |
| <i>i</i> -Pr-NH | 8.03         | 7.4         |

ESI MS *m/z* for C<sub>50</sub>H<sub>84</sub>N<sub>11</sub>O<sub>12</sub> [M+H]<sup>+</sup> calcd 1030.63, found 1030.50.



800 MHz <sup>1</sup>H NMR Spectrum of **1d** in CDCl<sub>3</sub>  
268 K (-5 °C), 20 mM

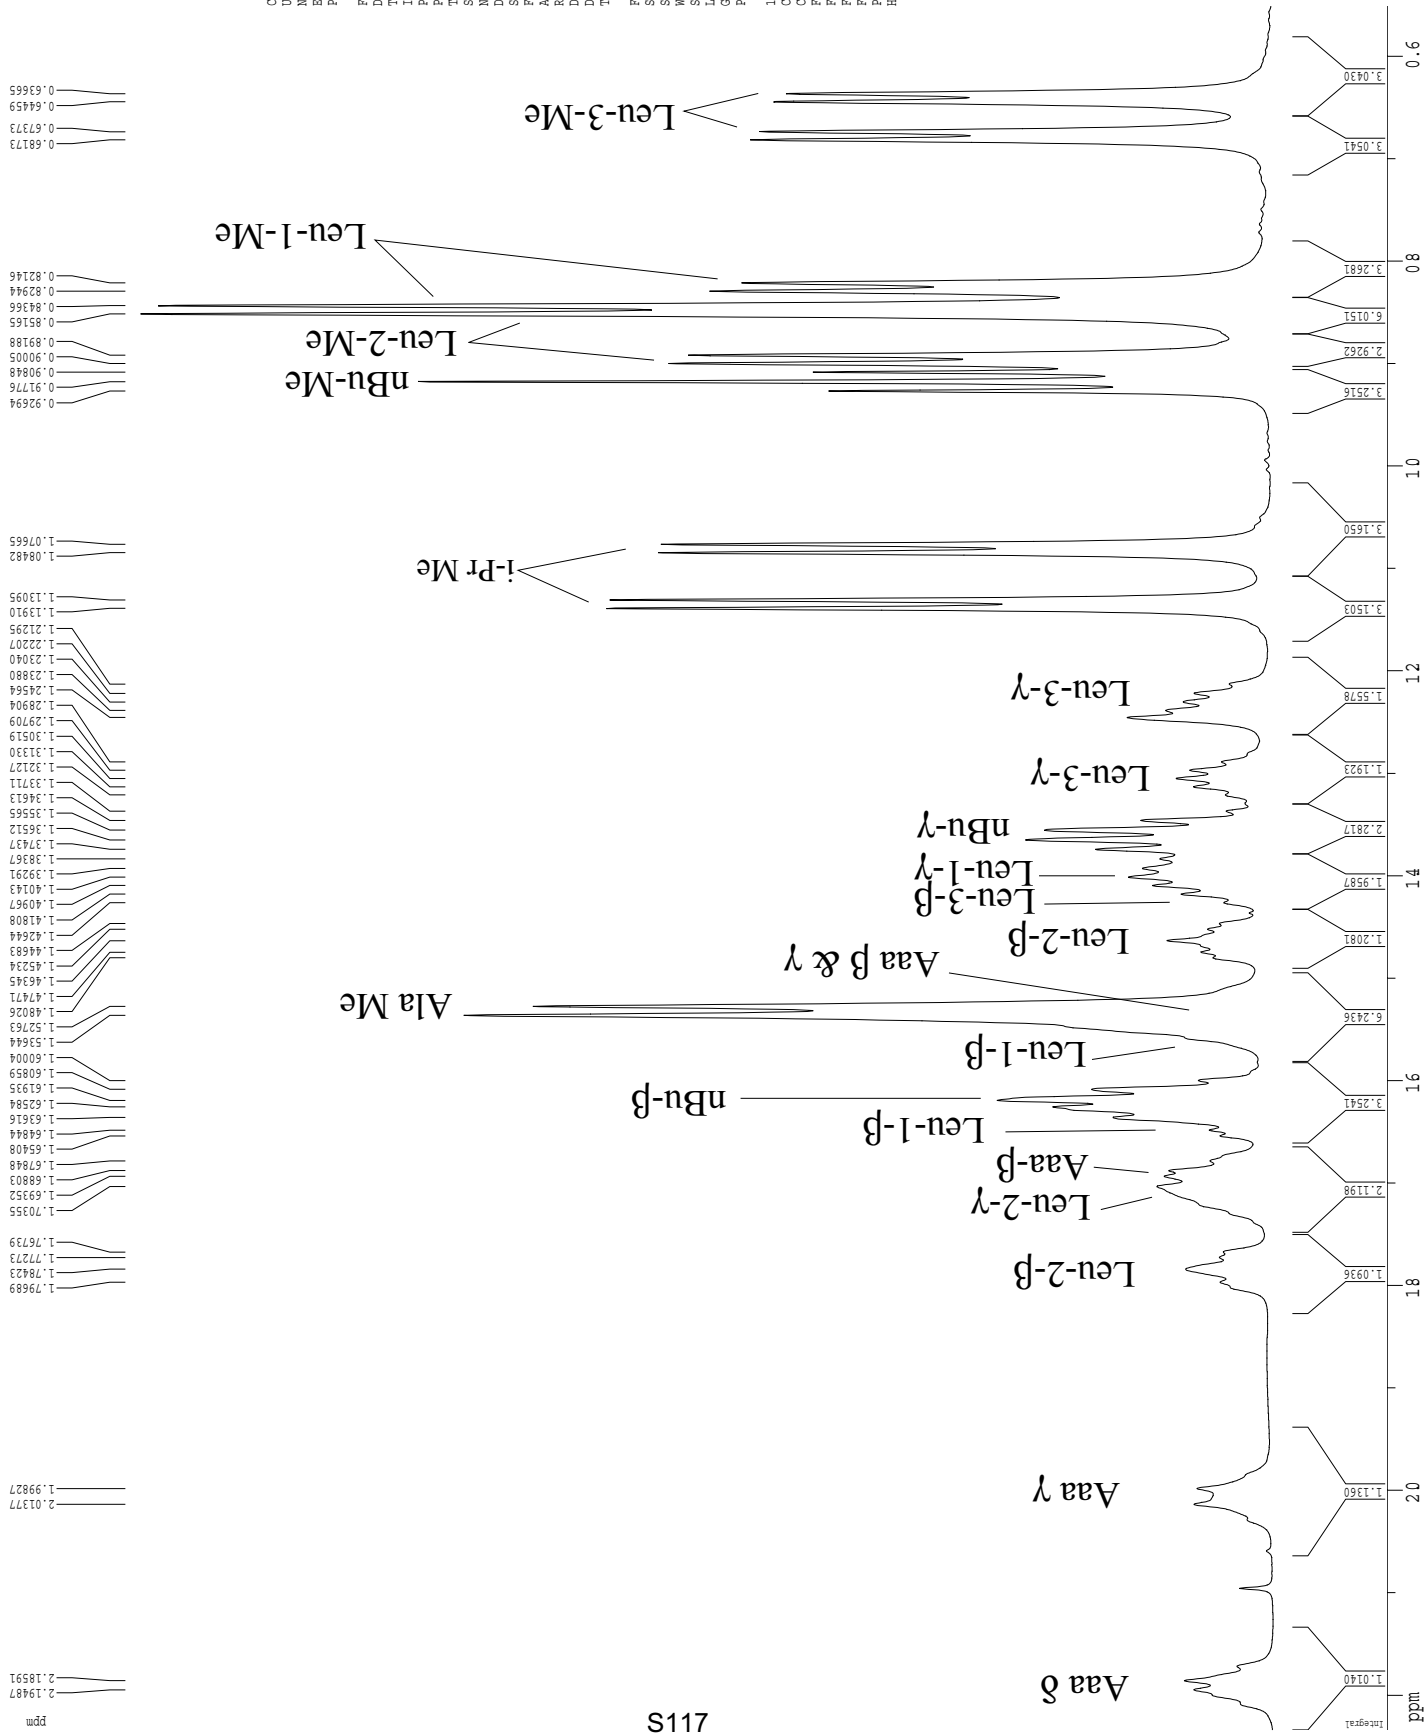

Current Data Parameters  
 USER slevin  
 NAME SL-7-20-800-H  
 EXPNO 1  
 PROCNO 1

F2 - Acquisition Parameters  
 Date\_ 20070117  
 Time 0.00  
 INSTRUM varian  
 PROBHD 40:5mmbrdcaan  
 PULPROG zgpg30  
 TD 65506  
 SFO 500.135  
 SOLVENT cdcl3  
 NS 32  
 DS 4  
 SWH 11001.101 Hz  
 FIDRES 0.199998 Hz  
 AQ 2.5000727 sec  
 RG 8192  
 DW 45.450 usec  
 DE 4.50 usec  
 TE 268.5 K

F2 - Processing parameter  
 SI 32768  
 SF 799.8064113 MHz  
 EN  
 GB 0  
 CB 0  
 SC 0  
 PC 2.00

1D NMR plot parameters  
 CX 22.80 cm  
 CY 15.00 cm  
 F1P 2.234 ppm  
 F1 1786.71 Hz  
 F2P 0.551 ppm  
 F2 441.08 Hz  
 PPMCM 0.07379 ppm/cm  
 HZCM 59.03900 Hz/cm

800 MHz COSY Spectrum of **1d** in CDCl<sub>3</sub>  
 268 K (-5 °C), 20 mM

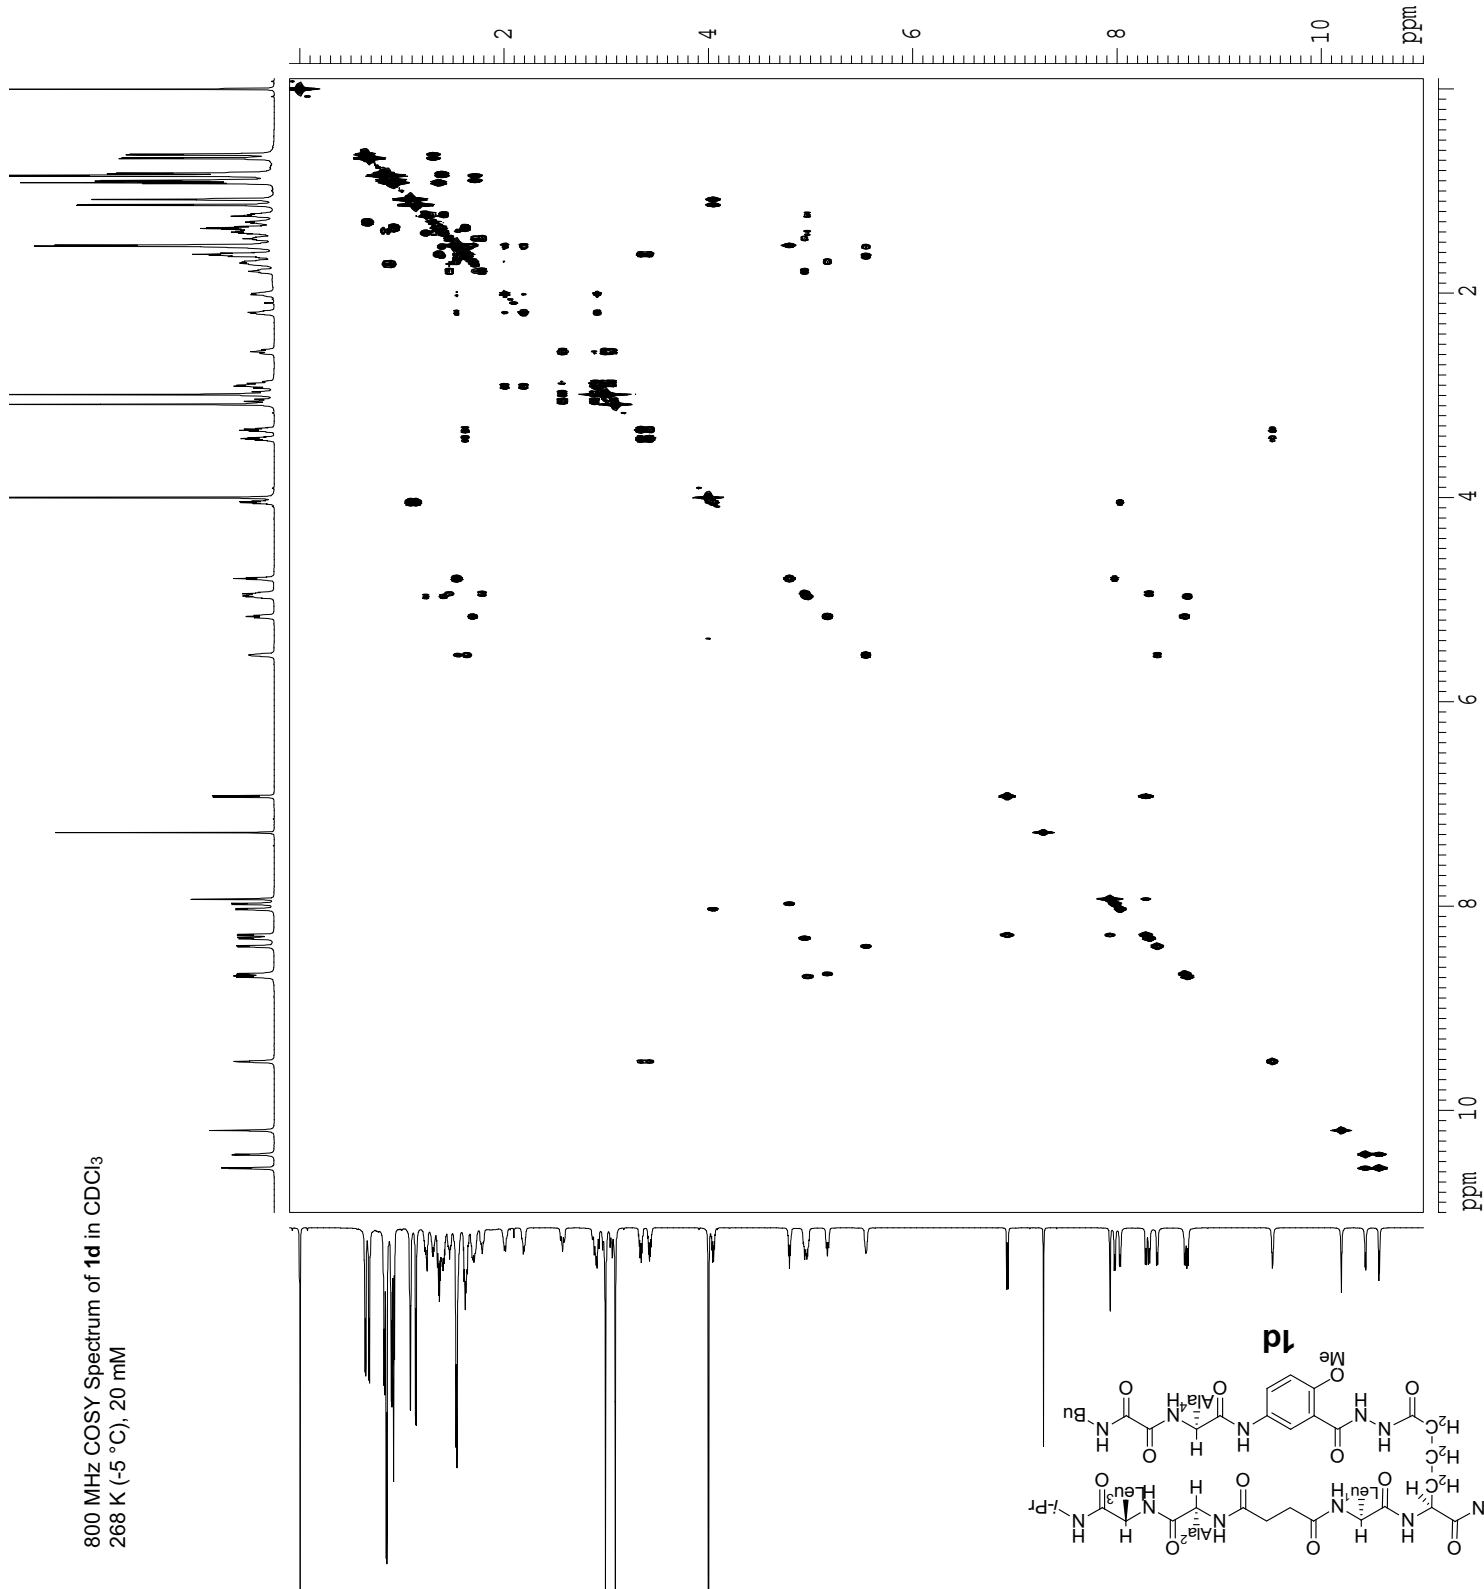

S118

Supporting Information

Current Data Parameters  
 USER slevin  
 NAME SL-7-202-800-H  
 EXPNO 3  
 PROCNO 1

F2 - Acquisition Parameters

Date\_ 20070117  
 Time 0.00  
 INSTRUM varian  
 PROBHD 40:5mmrbroadban  
 PULPROG gcosy  
 TD 4096  
 SOLVENT cdcl3  
 NS 4  
 DS 64  
 SWH 11001.101 Hz  
 FIDRES 2.685816 Hz  
 AQ 0.1843700 sec  
 RG 4096  
 DW 45.450 usec  
 DE 231.43 usec  
 TE 268.5 K

F1 - Acquisition Parameters

ND0 1  
 TD 512  
 SFO1 799.8107 MHz  
 FIDRES 21.486525 Hz  
 SW 13.755 ppm  
 F1MODE undefined

F2 - Processing parameters

SI 2048  
 SF 799.8064113 MHz  
 WDW SINE  
 SSB 0  
 LB 0.00 Hz  
 GB 0  
 PC 1.40

F1 - Processing parameters

SI 512  
 MC2 QF  
 SF 799.8064113 MHz  
 WDW SINE  
 SSB 0  
 LB 0.00 Hz  
 GB 0

2D NMR plot parameters

CX2 15.00 cm  
 CX1 15.00 cm  
 F2PLO 11.000 ppm  
 F2LO 8797.87 Hz  
 F2PHI -0.100 ppm  
 F2HI -79.98 Hz  
 F1PLO 11.000 ppm  
 F1LO 8797.87 Hz  
 F1PHI -0.100 ppm  
 F1HI -79.98 Hz  
 F2PPMCM 0.74000 ppm/cm  
 F2HZCM 591.85669 Hz/cm  
 F1PPMCM 0.74000 ppm/cm  
 F1HZCM 591.85669 Hz/cm

S. Levin and J. S. Nowick

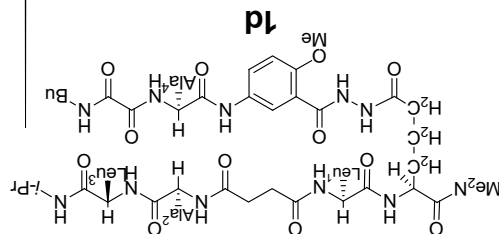

Current Data Parameters  
 USER slevin  
 NAME SL-7-202-800-H  
 EXPNO 3  
 PROCNO 1

F2 - Acquisition Parameters

Date\_ 20070117  
 Time 0.00  
 INSTRUM varian  
 PROBHD 40:5mm broadband  
 PULPROG gcpsy  
 TD 4096  
 SOLVENT cdcl3  
 NS 4  
 DS 64  
 SWH 11001.101 Hz  
 FIDRES 2.685816 Hz  
 AQ 0.1843700 sec  
 RG 4096  
 DW 45.450 usec  
 DE 231.43 usec  
 TE 268.5 K

F1 - Acquisition parameters

ND0 1  
 TD 512  
 SF01 799.8107 MHz  
 FIDRES 21.486525 Hz  
 SW 13.755 ppm  
 F1MODE undefined

F2 - Processing parameters

SI 2048  
 SF 799.8064113 MHz  
 SINE  
 WDW 0  
 LB 0.00 Hz  
 GB 0  
 PC 1.40

F1 - Processing parameters

SI 512  
 MC2 QF  
 SF 799.8064113 MHz  
 SINE  
 WDW 0  
 LB 0.00 Hz  
 GB 0

2D NMR plot parameters

CX2 15.00 cm  
 CX1 15.00 cm  
 F2PLO 5.600 ppm  
 F2LO 4478.92 Hz  
 F2PHI -0.100 ppm  
 F2HT -79.98 Hz  
 F1PLO 5.600 ppm  
 F1LO 4478.92 Hz  
 F1PHI -0.100 ppm  
 F1HT -79.98 Hz  
 F2PPMCW 0.38000 ppm/cm  
 F2HZCM 303.92645 Hz/cm  
 F1PPMCW 0.38000 ppm/cm  
 F1HZCM 303.92645 Hz/cm

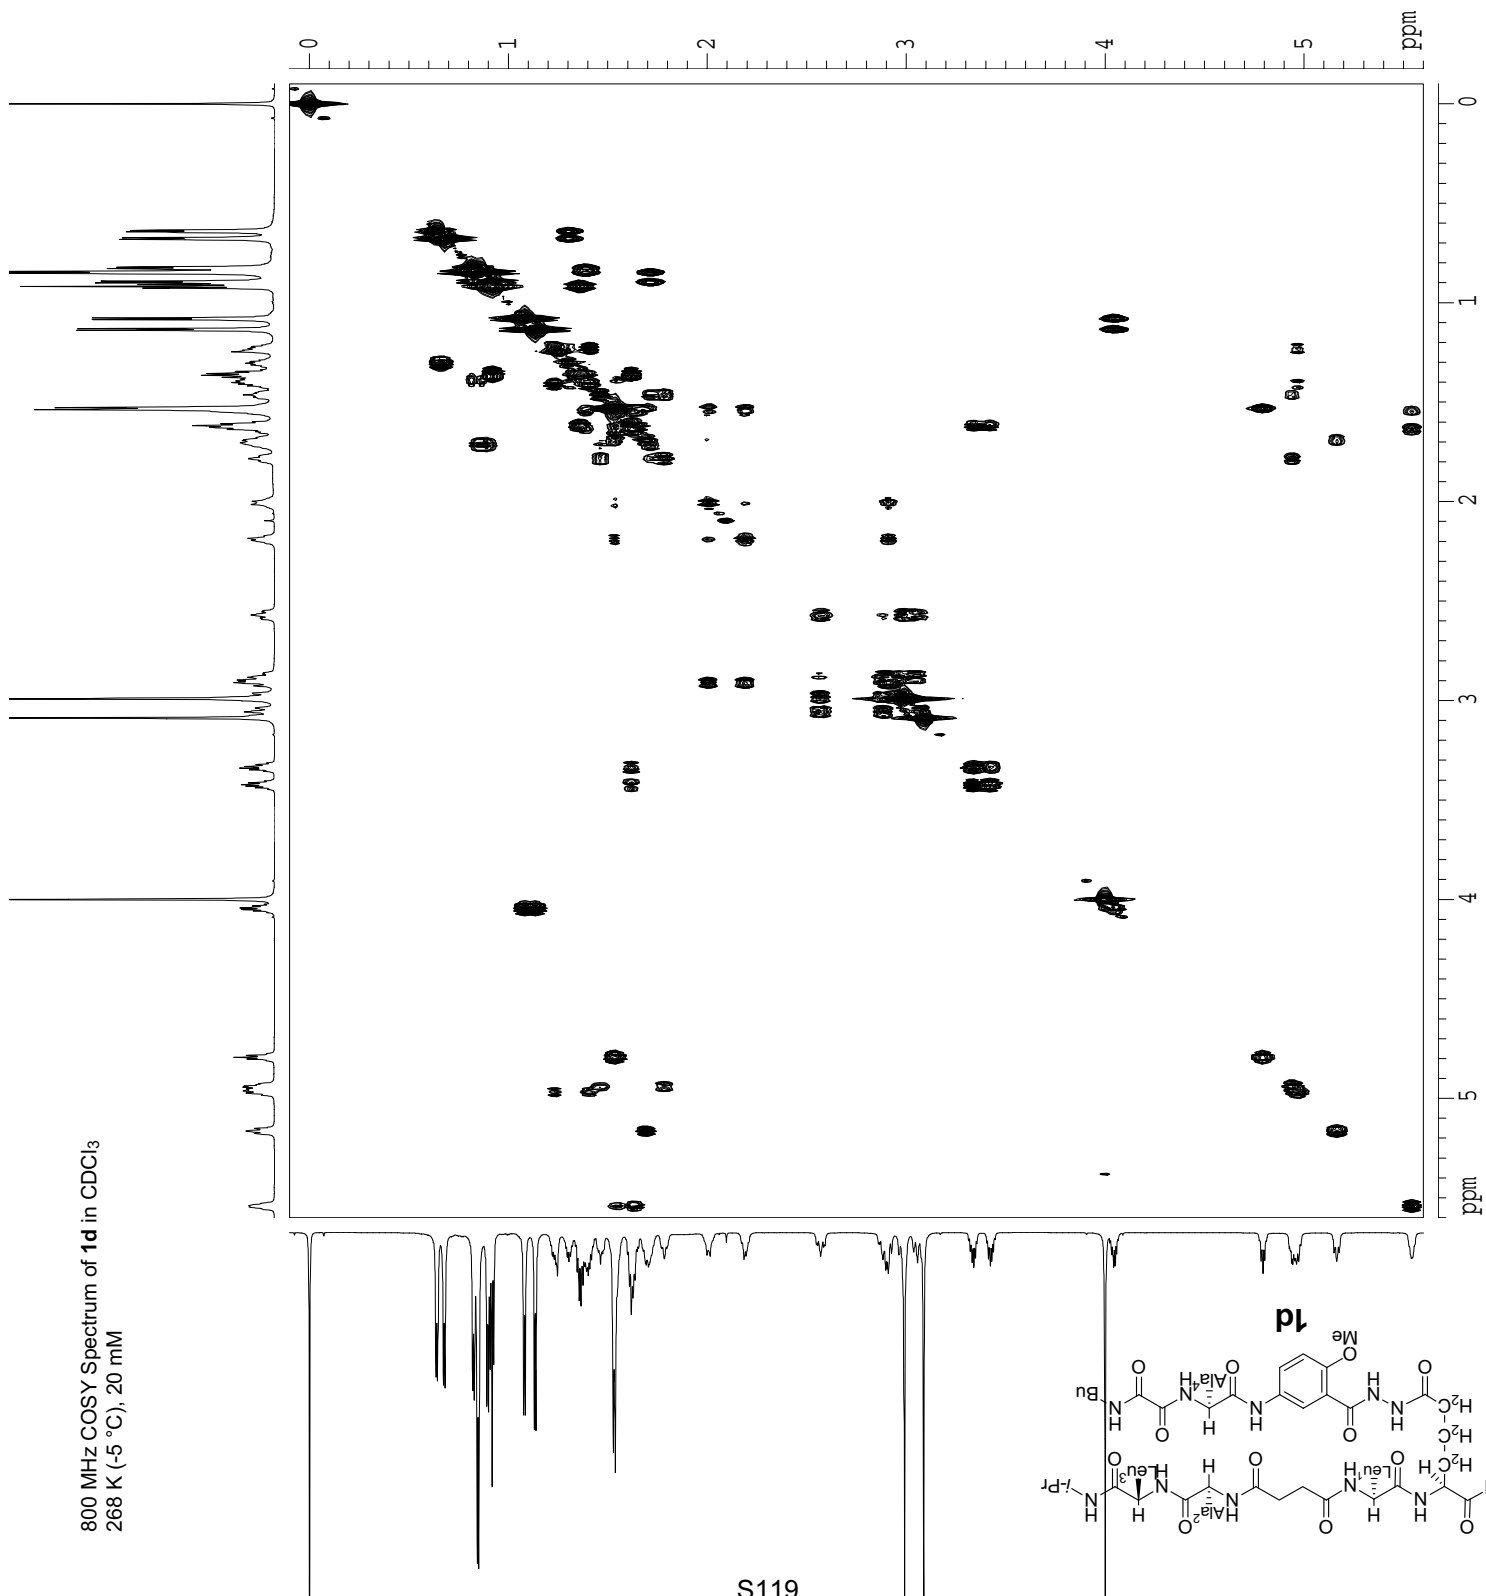

800 MHz COSY Spectrum of **1d** in CDCl<sub>3</sub>  
 268 K (-5 °C), 20 mM

Supporting Information

S. Levin and J. S. Nowick

Current Data Parameters  
 USER slewin  
 NAME SL-7-202-800-H  
 EXPNO 3  
 PROCNO 1

F2 - Acquisition Parameters

Date 20070117  
 Time 0.00  
 INSTRUM varian  
 PROBHD 40:5mmBroadban  
 PULPROG gcosy  
 TD 4096  
 SOLVENT cdcl3  
 NS 4  
 DS 64  
 SWH 11001.101 Hz  
 FIDRES 2.685816 Hz  
 AQ 0.1843700 sec  
 RG 4096  
 DW 45.450 usec  
 DE 231.43 usec  
 TE 268.5 K

F1 - Acquisition Parameters

ND0 1  
 TD 512  
 SFO1 799.8107 MHz  
 FIDRES 21.486525 Hz  
 SW 13.755 ppm  
 F1MODE undefined

F2 - Processing parameters

SI 2048  
 SF 799.8064113 MHz  
 WDW SINE  
 SSB 0  
 LB 0.00 Hz  
 GB 0  
 PC 1.40

F1 - Processing parameters

SI 512  
 MC2 OF  
 SF 799.8064113 MHz  
 WDW SINE  
 SSB 0  
 LB 0.00 Hz  
 GB 0

2D NMR plot parameters

CX2 15.00 cm  
 CX1 15.00 cm  
 F2PLO 5.600 ppm  
 F2LO 4478.92 Hz  
 F2PHI -0.100 ppm  
 F2HI -79.98 Hz  
 F1PLO 11.023 ppm  
 F1LO 8816.19 Hz  
 F1PHI 5.596 ppm  
 F1HI 4475.91 Hz  
 F2PPMCM 0.38000 ppm/cm  
 F2HZCM 303.92645 Hz/cm  
 F1PPMCM 0.36178 ppm/cm  
 F1HZCM 289.35184 Hz/cm

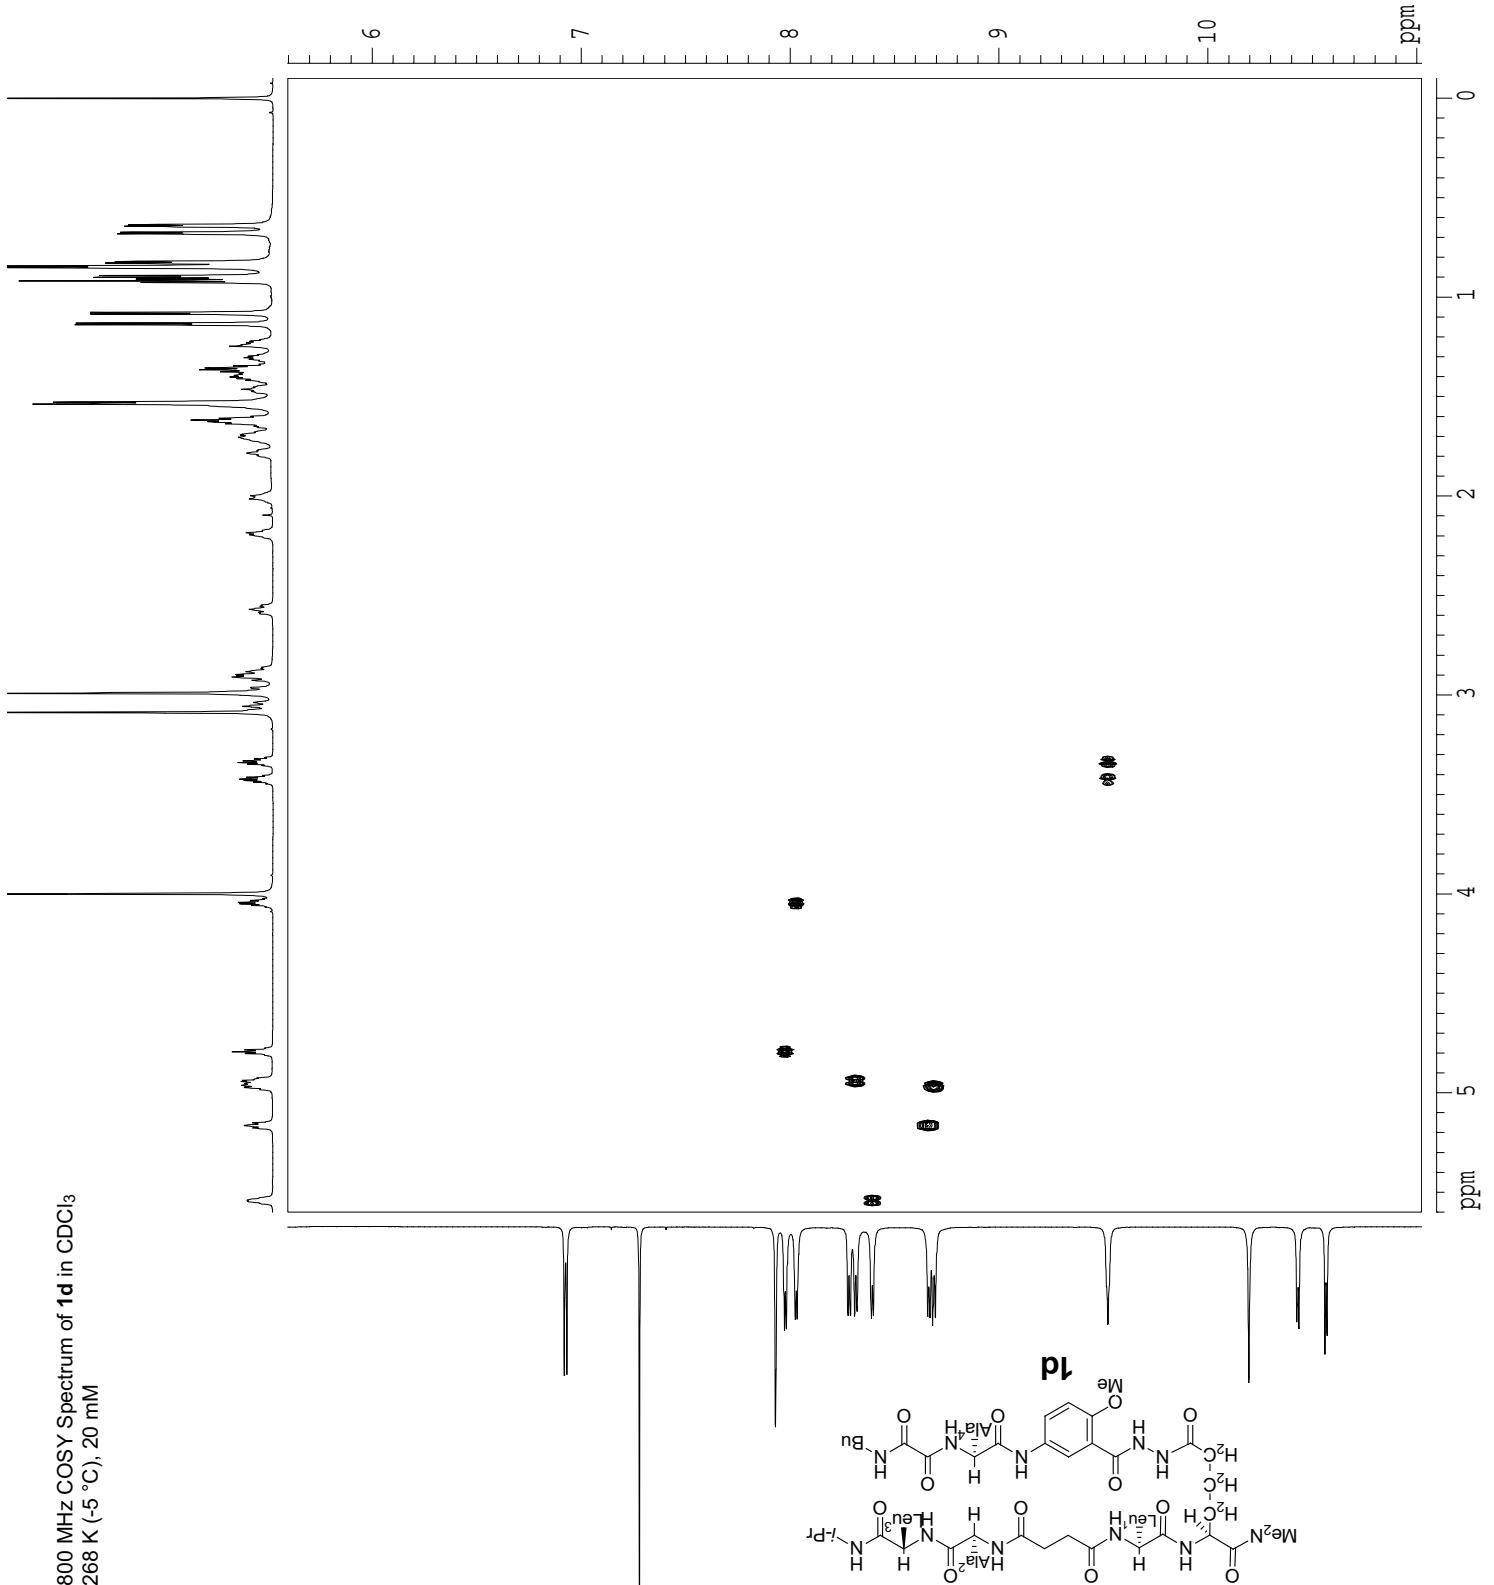



Current Data Parameters  
 USER slevin  
 NAME SL-7-202-800-H  
 EXNO 3  
 PROCNO 1

F2 - Acquisition Parameters

Date\_ 20070117  
 Time\_ 0.00  
 INSTRUM varian  
 PROBHD 40:5mmbroadban  
 PULPROG gcosy  
 TD 4096  
 SOLVENT cdcl3  
 NS 4  
 DS 64  
 SWH 11001.101 Hz  
 FIDRES 2.685816 Hz  
 AQ 0.1843700 sec  
 RG 4096  
 DW 45.450 usec  
 DE 231.43 usec  
 TE 268.5 K

F1 - Acquisition Parameters

ND0 1  
 TD 512  
 SF01 799.8107 MHz  
 FIDRES 21.486525 Hz  
 SW 13.755 ppm  
 F1MODE undefined

F2 - Processing parameters

SI 2048  
 SF 799.8064113 MHz  
 SINE  
 SSB 0  
 LB 0.00 Hz  
 GB 0  
 PC 1.40

F1 - Processing parameters

SI 512  
 MC2 QF  
 SF 799.8064113 MHz  
 SINE  
 SSB 0  
 LB 0.00 Hz  
 GB 0

2D NMR plot parameters

CX2 15.00 cm  
 CX1 15.00 cm  
 F2FLO 11.003 ppm  
 F2LO 8800.08 Hz  
 F2PHI 5.596 ppm  
 F2HI 4475.91 Hz  
 F1FLO 11.000 ppm  
 F1LO 8797.87 Hz  
 F1PHI 5.600 ppm  
 F1HI 4478.92 Hz  
 F2PPMCM 0.36043 ppm/cm  
 F2HZCM 288.27753 Hz/cm  
 F1PPMCM 0.36000 ppm/cm  
 F1HZCM 287.93030 Hz/cm

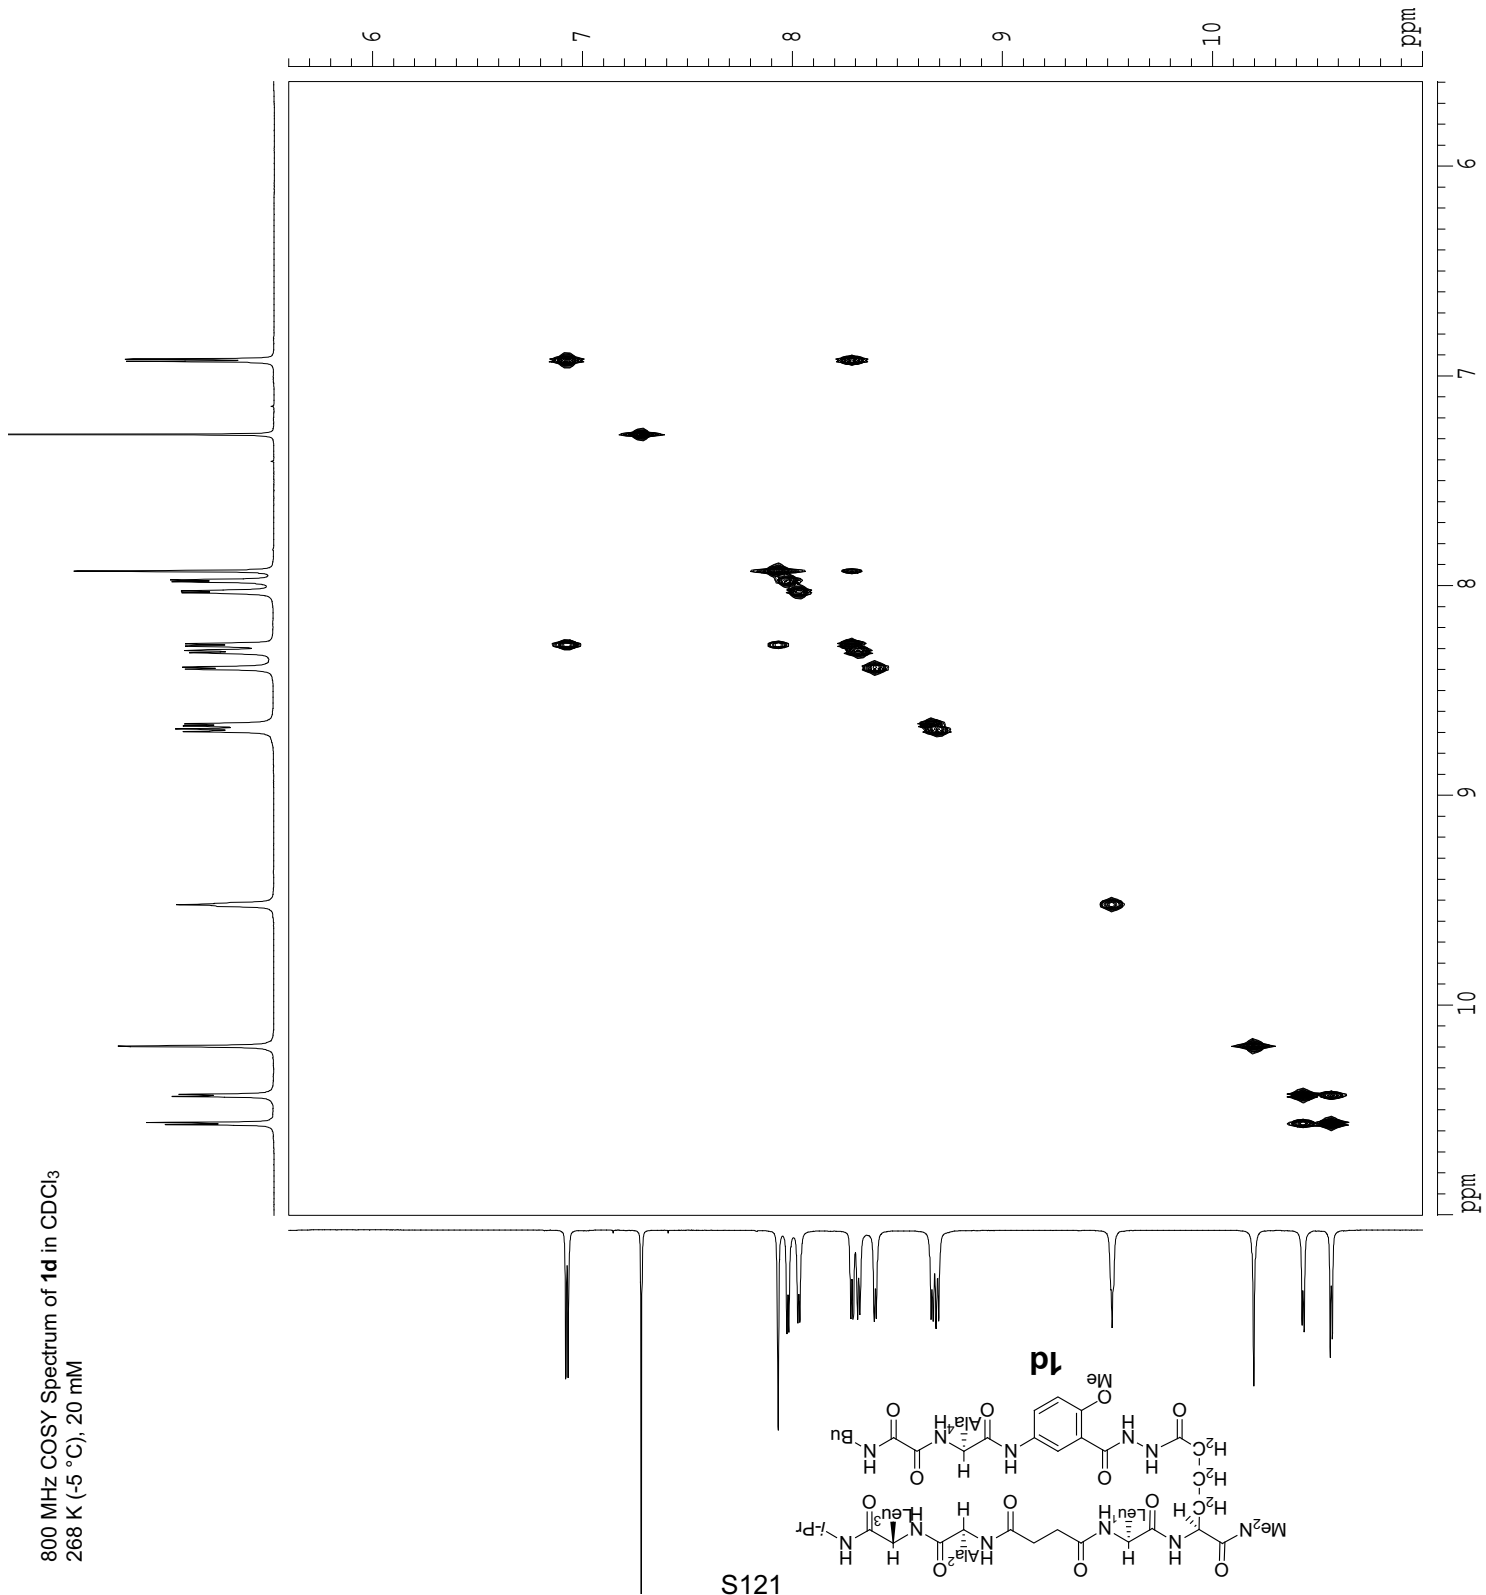

800 MHz COSY Spectrum of **1d** in CDCl<sub>3</sub>  
 268 K (-5 °C), 20 mM

Supporting Information

Current Data Parameters  
 USER slevin  
 NAME SL-7-202-800-H  
 EXPNO 3  
 PROCNO 1

F2 - Acquisition Parameters  
 Date\_ 20070117  
 Time\_ 0.00  
 INSTRUM varian  
 PROBDH 40:5mmbroadban  
 PULPROG gocsy  
 TD 4096  
 SOLVENT cdc13  
 NS 4  
 DS 64  
 SWH 11001.101 Hz  
 FIDRES 2.685816 Hz  
 AQ 0.1843700 sec  
 RG 4096  
 DW 45.450 usec  
 DE 231.43 usec  
 TE 268.5 K

F1 - Acquisition Parameters  
 ND0 1  
 TD 512  
 SFO1 799.8107 MHz  
 FIDRES 21.486525 Hz  
 SW 13.755 ppm  
 F1MODE undefined

F2 - Processing parameters  
 SI 2048  
 SF 799.8064113 MHz  
 WDW SINE  
 SSB 0  
 LB 0.00 Hz  
 GB 0  
 PC 1.40

F1 - Processing parameters  
 SI 512  
 MC2 QF  
 SF 799.8064113 MHz  
 WDW SINE  
 SSB 0  
 LB 0.00 Hz  
 GB 0

S. Levin and J. S. Nowick  
 2D NMR plot parameters  
 CX2 15.00 cm  
 CX1 15.00 cm  
 F2PLO 11.003 ppm  
 F2LO 8800.08 Hz  
 F2PHI 5.596 ppm  
 F2HI 4475.91 Hz  
 F1PLO 5.623 ppm  
 F1LO 4497.40 Hz  
 F1PHI -0.180 ppm  
 F1HI -143.69 Hz  
 F2PPMCM 0.36043 ppm/cm  
 F1PPMCM 288.27753 Hz/cm  
 F1HZCM 0.38685 ppm/cm  
 F1HZCM 309.40594 Hz/cm

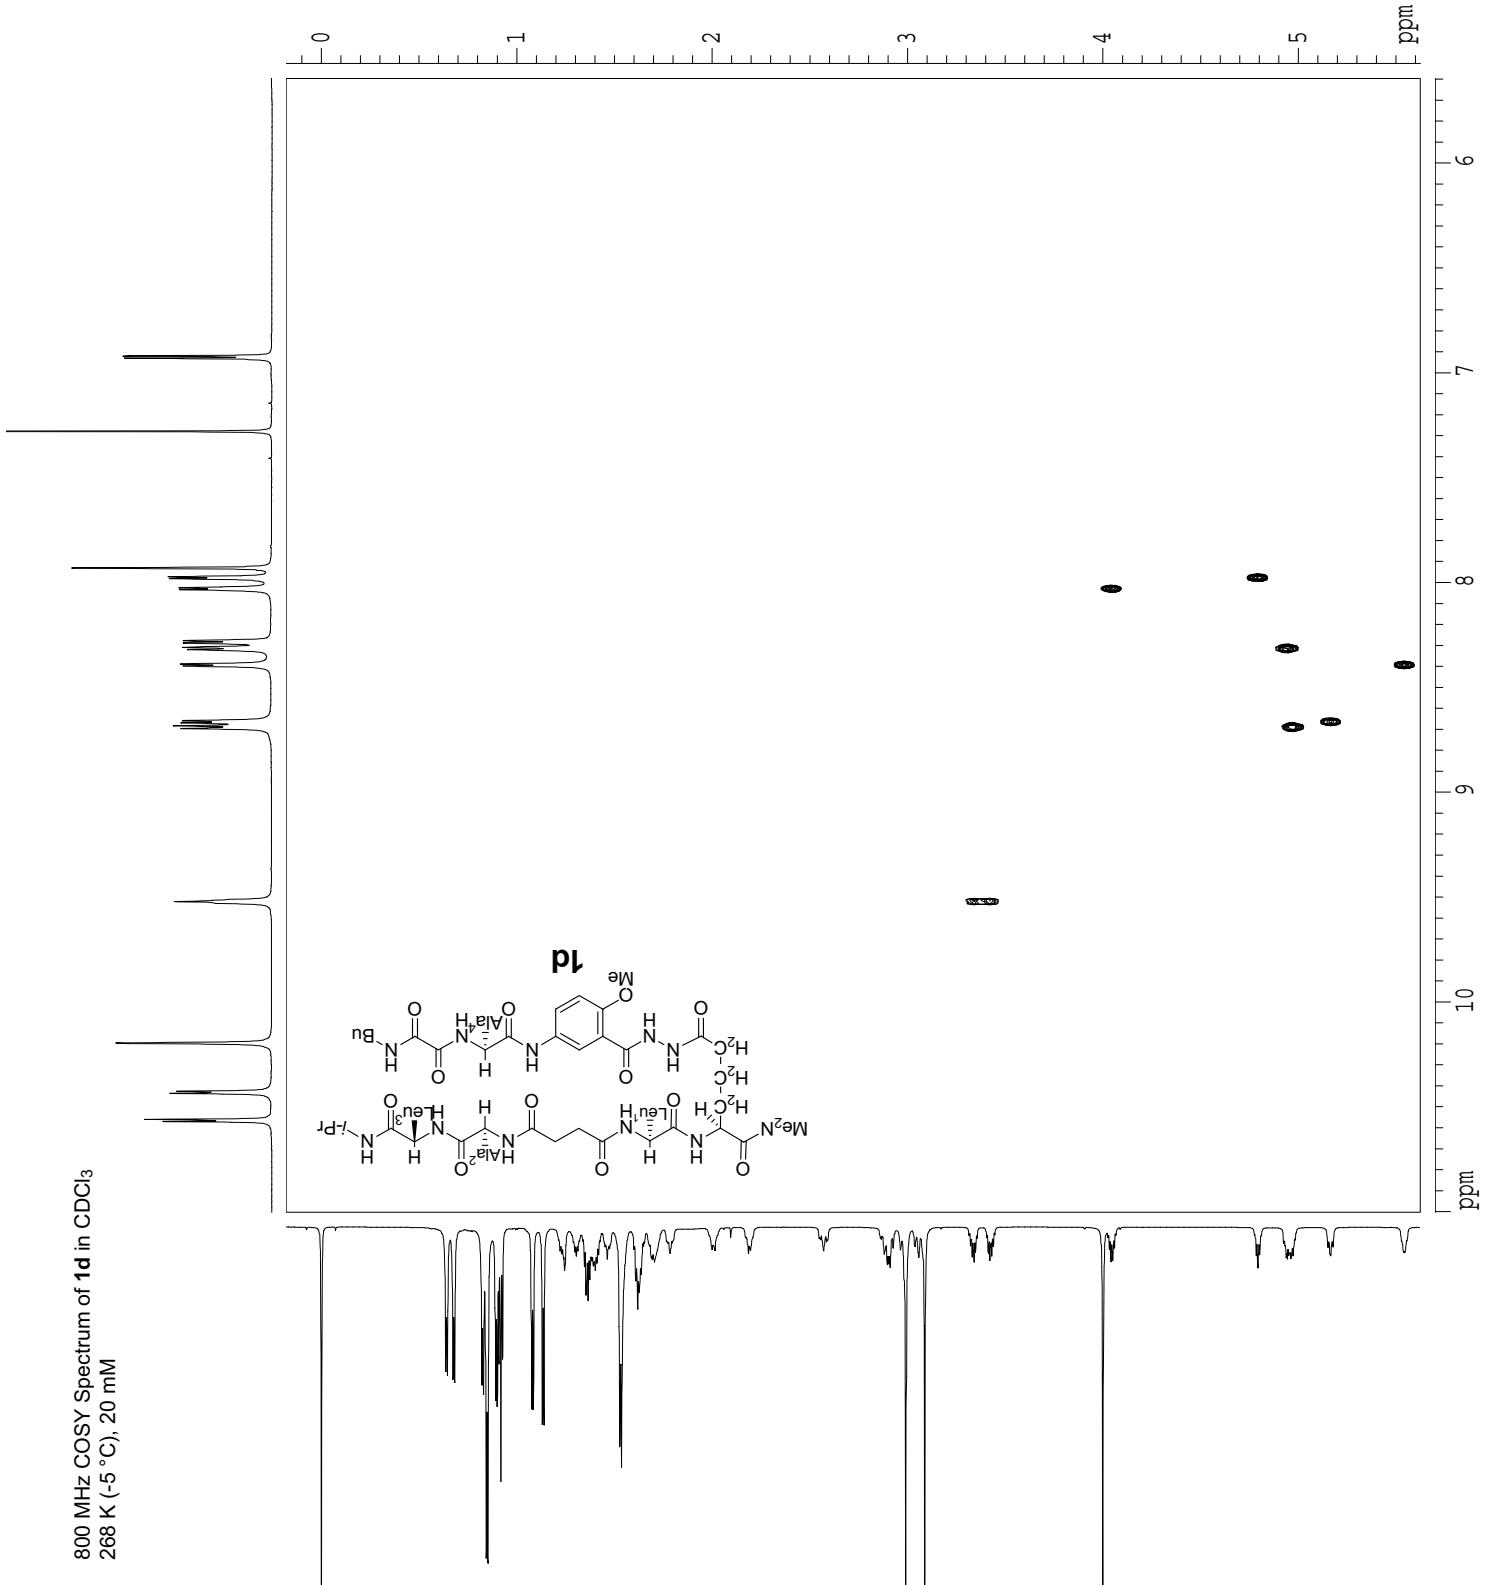

800 MHz COSY Spectrum of **1d** in CDCl<sub>3</sub>  
268 K (-5 °C), 20 mM

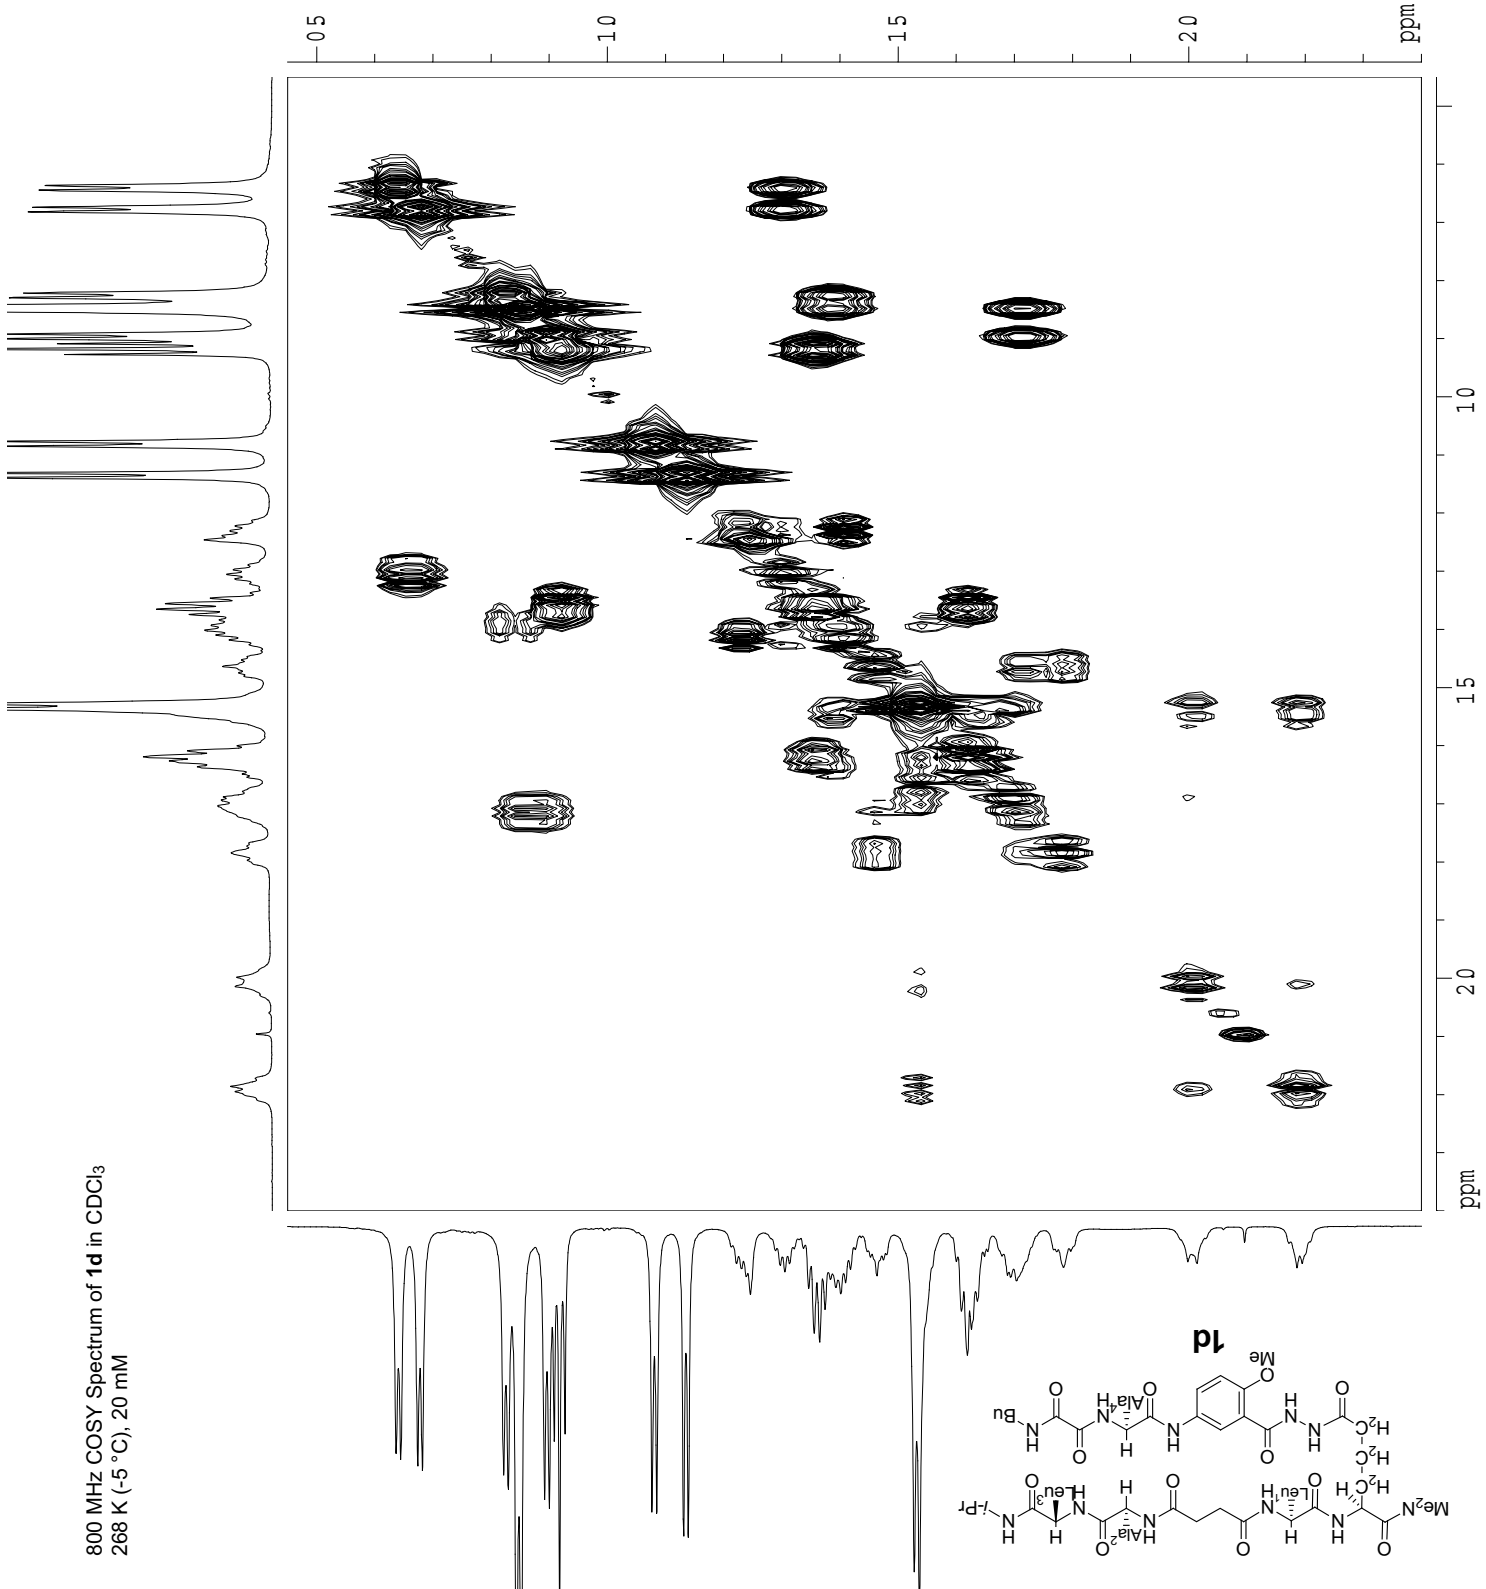

Supporting Information

Current Data Parameters  
 USER slewin  
 NAME SL-7-202-800-H  
 EXPNO 3  
 PROCNO 1

F2 - Acquisition Parameters  
 Date\_ 20070117  
 Time\_ 0.00  
 INSTRUM varian  
 PROBHD 40:5mm broadband  
 PULPROG gcpsy  
 TD 4096  
 SOLVENT cdcl3  
 NS 4  
 DS 64  
 SWH 11001.101 Hz  
 FIDRES 2.685816 Hz  
 AQC 0.1843700 sec  
 RG 4096  
 DW 45.450 usec  
 DE 231.43 usec  
 TE 268.5 K

F1 - Acquisition parameters  
 ND0 1  
 TD 512  
 SF01 799.8107 MHz  
 FIDRES 21.486525 Hz  
 SW 13.755 ppm  
 FMODE undefined

F2 - Processing parameters  
 SI 2048  
 SF 799.8064113 MHz  
 WDW SINE  
 SSB 0  
 LB 0.00 Hz  
 GB 0  
 PC 1.40

F1 - Processing parameters  
 SI 512  
 MC2 QF  
 SF 799.8064113 MHz  
 WDW SINE  
 SSB 0  
 LB 0.00 Hz  
 GB 0

2D NMR plot parameters  
 CX2 15.00 cm  
 CX1 15.00 cm  
 F2PLO 2.400 ppm  
 F2LO 1919.54 Hz  
 F2PHI 0.450 ppm  
 F2HI 359.91 Hz  
 F1PLO 2.400 ppm  
 F1LO 1919.54 Hz  
 F1PHI 0.450 ppm  
 F1HI 359.91 Hz  
 F2PPMCM 0.13000 ppm/cm  
 F2HZCM 103.97483 Hz/cm  
 F1PPMCM 0.13000 ppm/cm  
 F1HZCM 103.97483 Hz/cm



Supporting Information

S. Levin and J. S. Nowick

Current Data Parameters  
 USER slevin  
 NAME SL-7-202-800-H  
 EXPNO 4  
 PROCNO 1

F2 - Acquisition Parameters

Date\_ 20070117  
 Time 0.00  
 INSTRUM varian  
 PROBHD 40.5mm broadband  
 PULPROG wgtocsy.bn  
 TD 4096  
 SOLVENT CDCl3  
 NS 16  
 DS 64  
 SWH 11001.101 Hz  
 FIDRES 2.685816 Hz  
 AQ 0.1862132 sec  
 RG 287.4  
 DW 45.450 usec  
 DE 6.00 usec  
 TE 268.5 K

F1 - Acquisition Parameters

ND0 1  
 TD 512  
 SF01 799.8107 MHz  
 FIDRES 21.486525 Hz  
 SW 13.755 ppm  
 F1MODE undefined

F2 - Processing parameters

SI 2048  
 SF 799.8064113 MHz  
 WDW QSI  
 SSB 2  
 LB 0.00 Hz  
 GB 0  
 PC 1.40

F1 - Processing parameters

SI 1024  
 MC2 States  
 SF 799.8064113 MHz  
 WDW QSI  
 SSB 2  
 LB 0.00 Hz  
 GB 0

2D NMR plot parameters

CX2 15.00 cm  
 CX1 15.00 cm  
 F2PLO 5.600 ppm  
 F2LO 4478.92 Hz  
 F2PHI -0.100 ppm  
 F2HI -79.98 Hz  
 F1PLO 5.600 ppm  
 F1LO 4478.92 Hz  
 F1PHI -0.100 ppm  
 F1HI -79.98 Hz  
 F2PPMCM 0.38000 ppm/cm  
 F2HZCM 303.92645 Hz/cm  
 F1PPMCM 0.38000 ppm/cm  
 F1HZCM 303.92645 Hz/cm

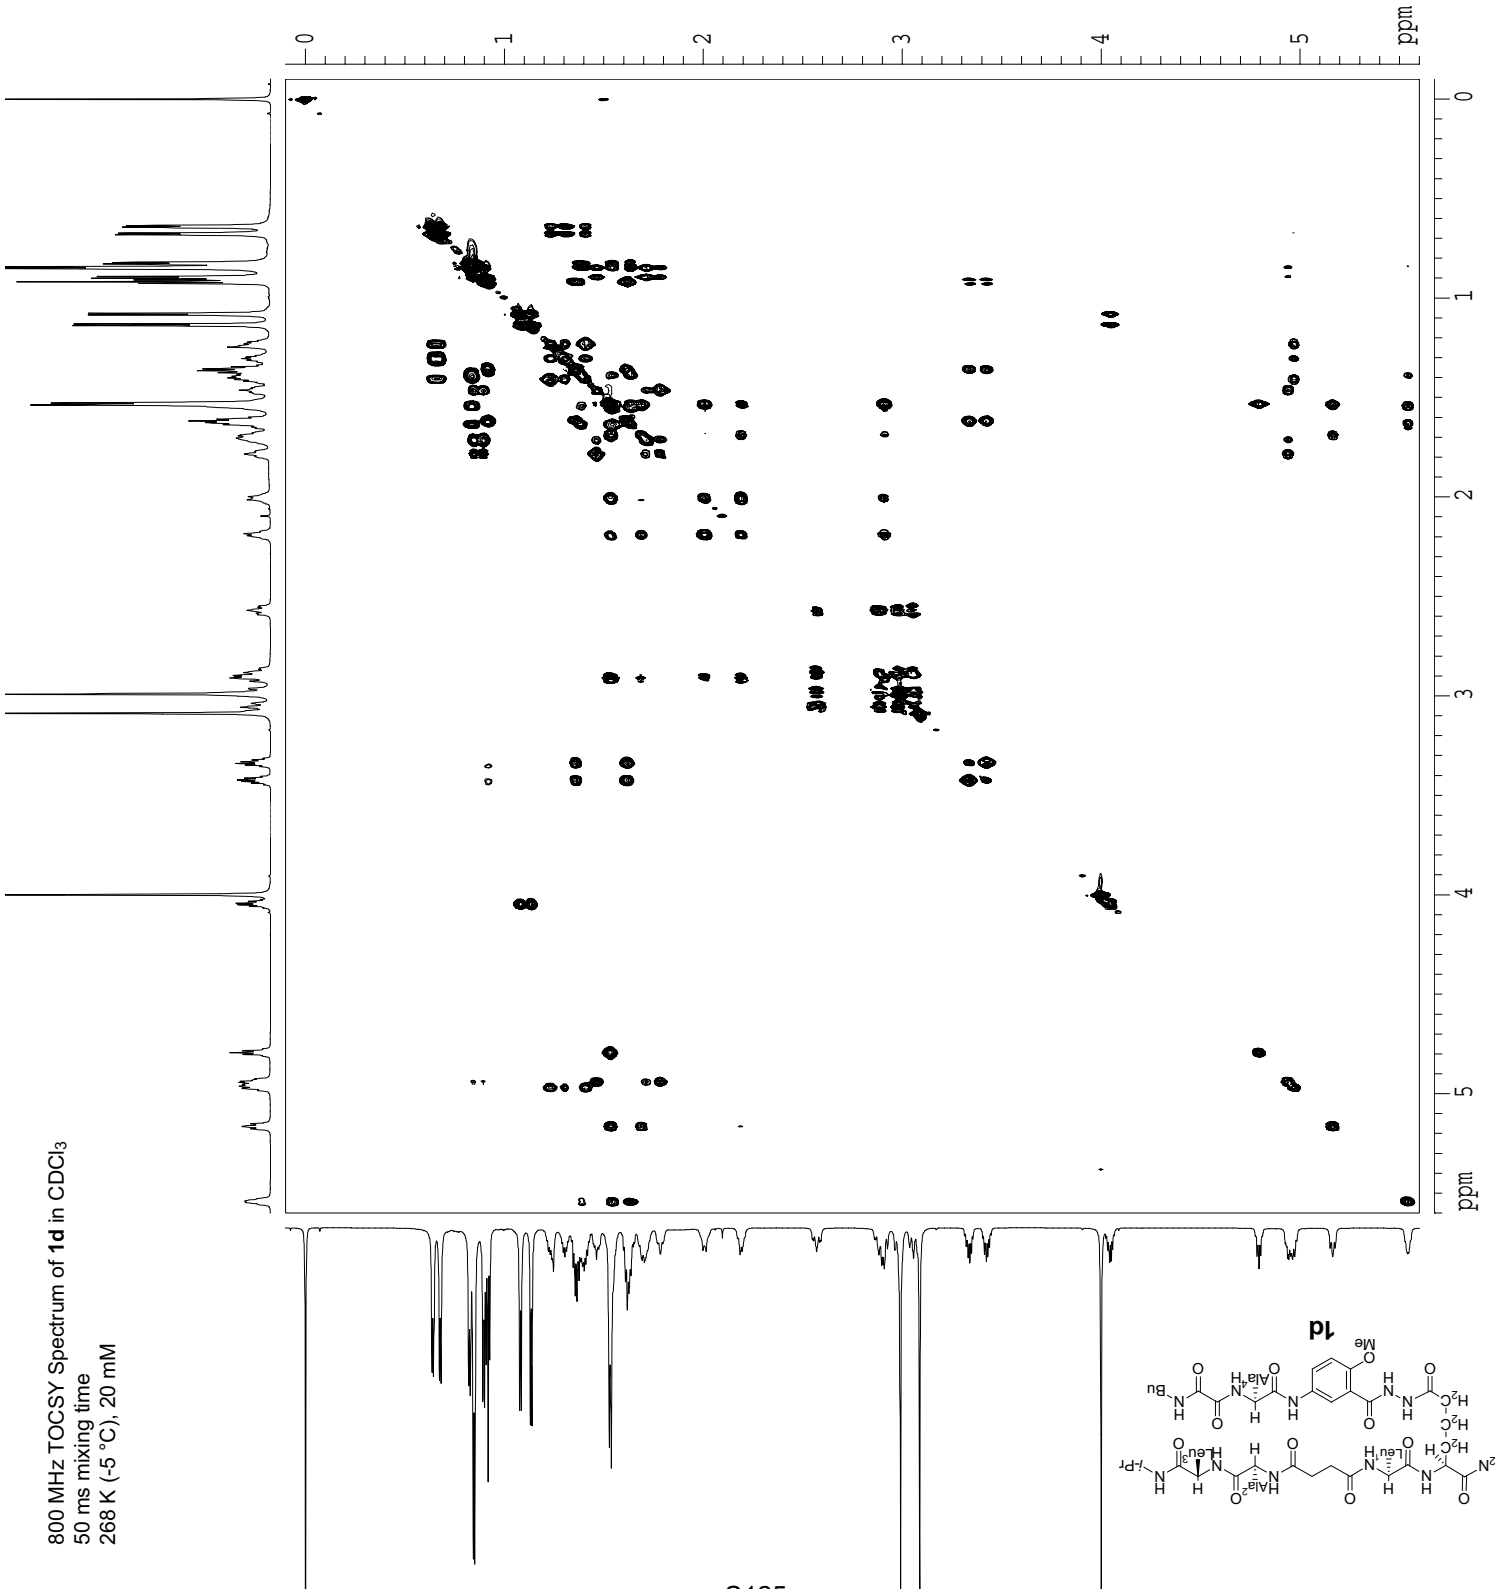

Supporting Information

S. Levin and J. S. Nowick

Current Data Parameters  
 USER slevin  
 NAME SL-7-202-800-H  
 EXPNO 4  
 PROCNO 1

F2 - Acquisition Parameters

Date 20070117  
 Time 0.00  
 INSTRUM varian  
 PROBHD 40:5mmrbroadban  
 PULPROG wgtocsy\_bn  
 TD 4096  
 SOLVENT CDCl3  
 NS 16  
 DS 64  
 SWH 11001.101 Hz  
 FIDRES 2.685816 Hz  
 AQ 0.1862132 sec  
 RG 287.4  
 DW 45.450 usec  
 DE 6.00 usec  
 TE 268.5 K

F1 - Acquisition Parameters

ND0 1  
 TD 512  
 SFO1 799.8107 MHz  
 FIDRES 21.486525 Hz  
 SW 13.755 ppm  
 F1MODE undefined

F2 - Processing parameters

SI 2048  
 SF 799.8064113 MHz  
 WDW QSI  
 SSB 2  
 LB 0.00 Hz  
 GB 0  
 PC 1.40

F1 - Processing parameters

SI 1024  
 MC2 States  
 SF 799.8064113 MHz  
 WDW QSI  
 SSB 2  
 LB 0.00 Hz  
 GB 0

2D NMR plot parameters

CX2 15.00 cm  
 CX1 15.00 cm  
 F2PLO 11.000 ppm  
 F2LO 8797.87 Hz  
 F2PHI 5.600 ppm  
 F2HI 4478.92 Hz  
 F1LO 5.610 ppm  
 F1PHI 4486.66 Hz  
 F1HI -0.112 ppm  
 F1H1 -89.97 Hz  
 F2PWC1 0.36000 ppm/cm  
 F2H2C1 287.93030 Hz/cm  
 F1PWC1 0.38148 ppm/cm  
 F1H2C1 305.10861 Hz/cm

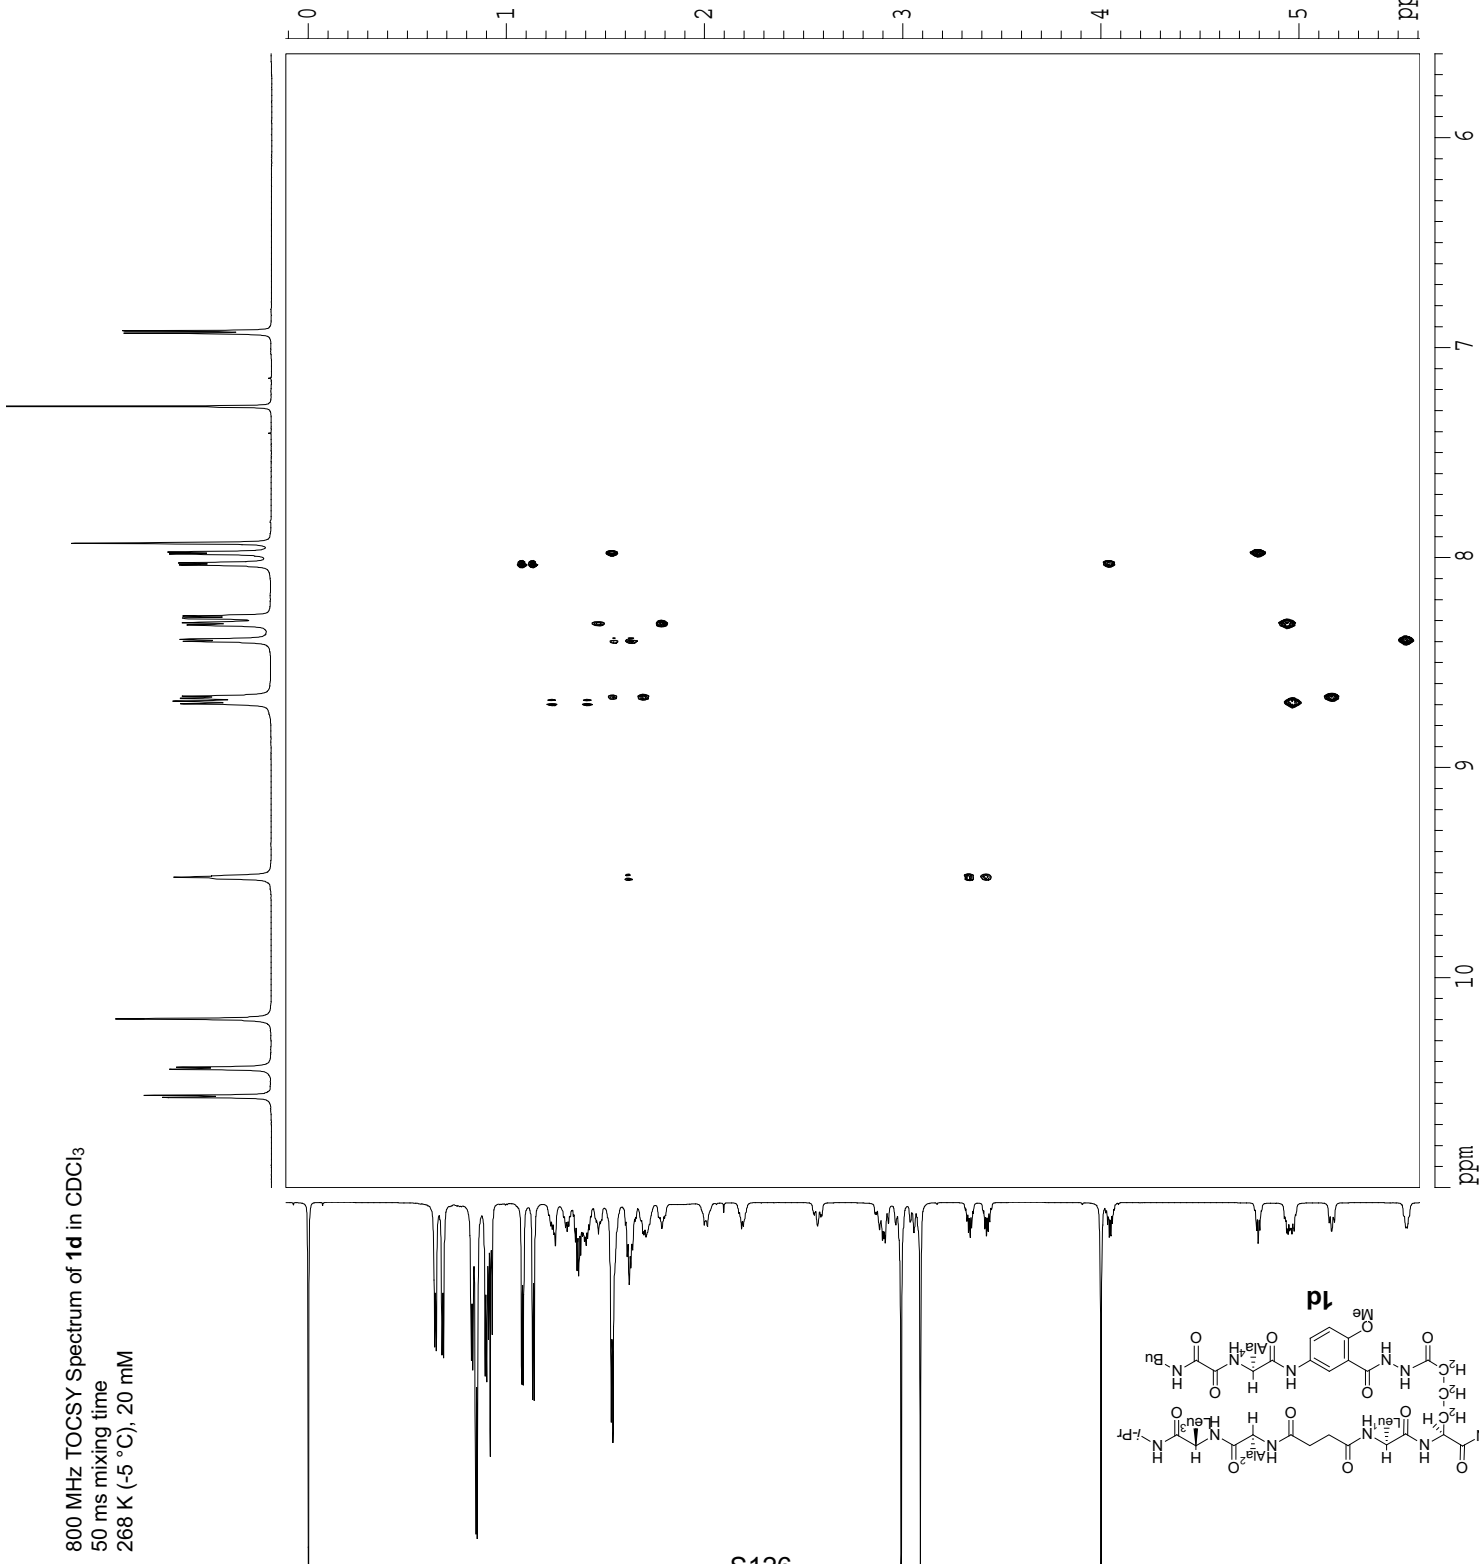

Supporting Information

S. Levin and J. S. Nowick

Current Data Parameters

USER slevin  
 NAME SL-7-202-800-H  
 EXPNO 4  
 PROCNO 1

F2 - Acquisition Parameters

Date\_ 20070117  
 Time\_ 0.00  
 INSTRUM varian  
 PROBHD 40:5mmrbroadban  
 PULPROG wgtocsy\_bn  
 TD 4096  
 SOLVENT CDCl3  
 NS 16  
 DS 64  
 SWH 11001.101 Hz  
 FIDRES 2.685816 Hz  
 AQ 0.1862132 sec  
 RG 287.4  
 DW 45.450 usec  
 DE 6.00 usec  
 TE 268.5 K

F1 - Acquisition parameters

ND0 1  
 TD 512  
 SF01 799.8107 MHz  
 FIDRES 21.486525 Hz  
 SW 13.755 ppm  
 F1MODE undefined

F2 - Processing parameters

SI 2048  
 SF 799.8064113 MHz  
 WDW QSI  
 SSB 2  
 LB 0.00 Hz  
 GB 0  
 PC 1.40

F1 - Processing parameters

SI 1024  
 MC2 States  
 SF 799.8064113 MHz  
 WDW QSI  
 SSB 2  
 LB 0.00 Hz  
 GB 0

2D NMR plot parameters

CX2 15.00 cm  
 CX1 15.00 cm  
 F2PLO 11.000 ppm  
 F2LO 8797.87 Hz  
 F2PHI 5.600 ppm  
 F2HI 4478.92 Hz  
 F1PLO 11.000 ppm  
 F1LO 8797.87 Hz  
 F1PHI 5.600 ppm  
 F1HI 4478.92 Hz  
 F2PPMCM 0.36000 ppm/cm  
 F2HZCM 287.93030 Hz/cm  
 F1PPMCM 0.36000 ppm/cm  
 F1HZCM 287.93030 Hz/cm

800 MHz TOCSY Spectrum of **1d** in CDCl<sub>3</sub>

50 ms mixing time  
 268 K (-5 °C), 20 mM

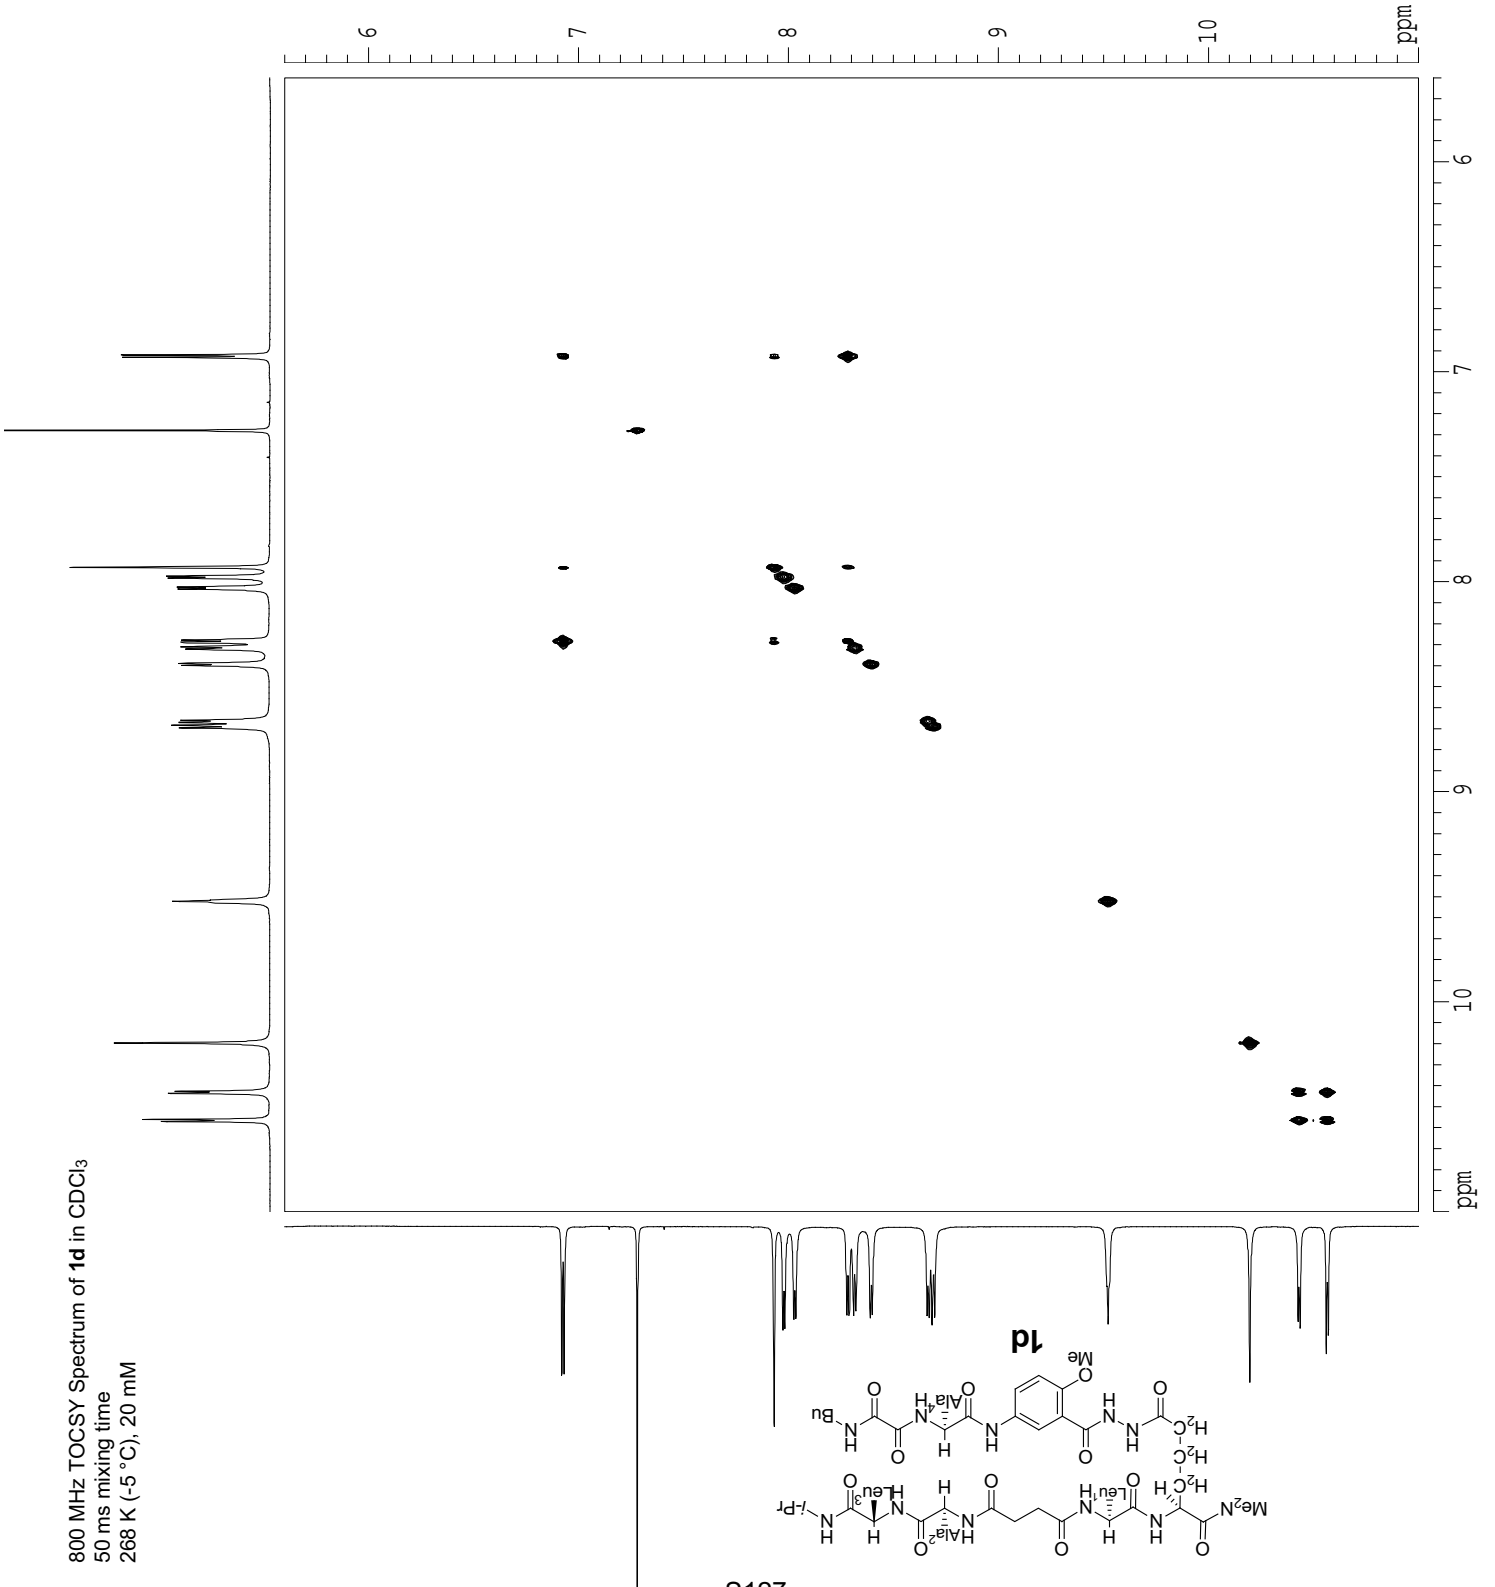

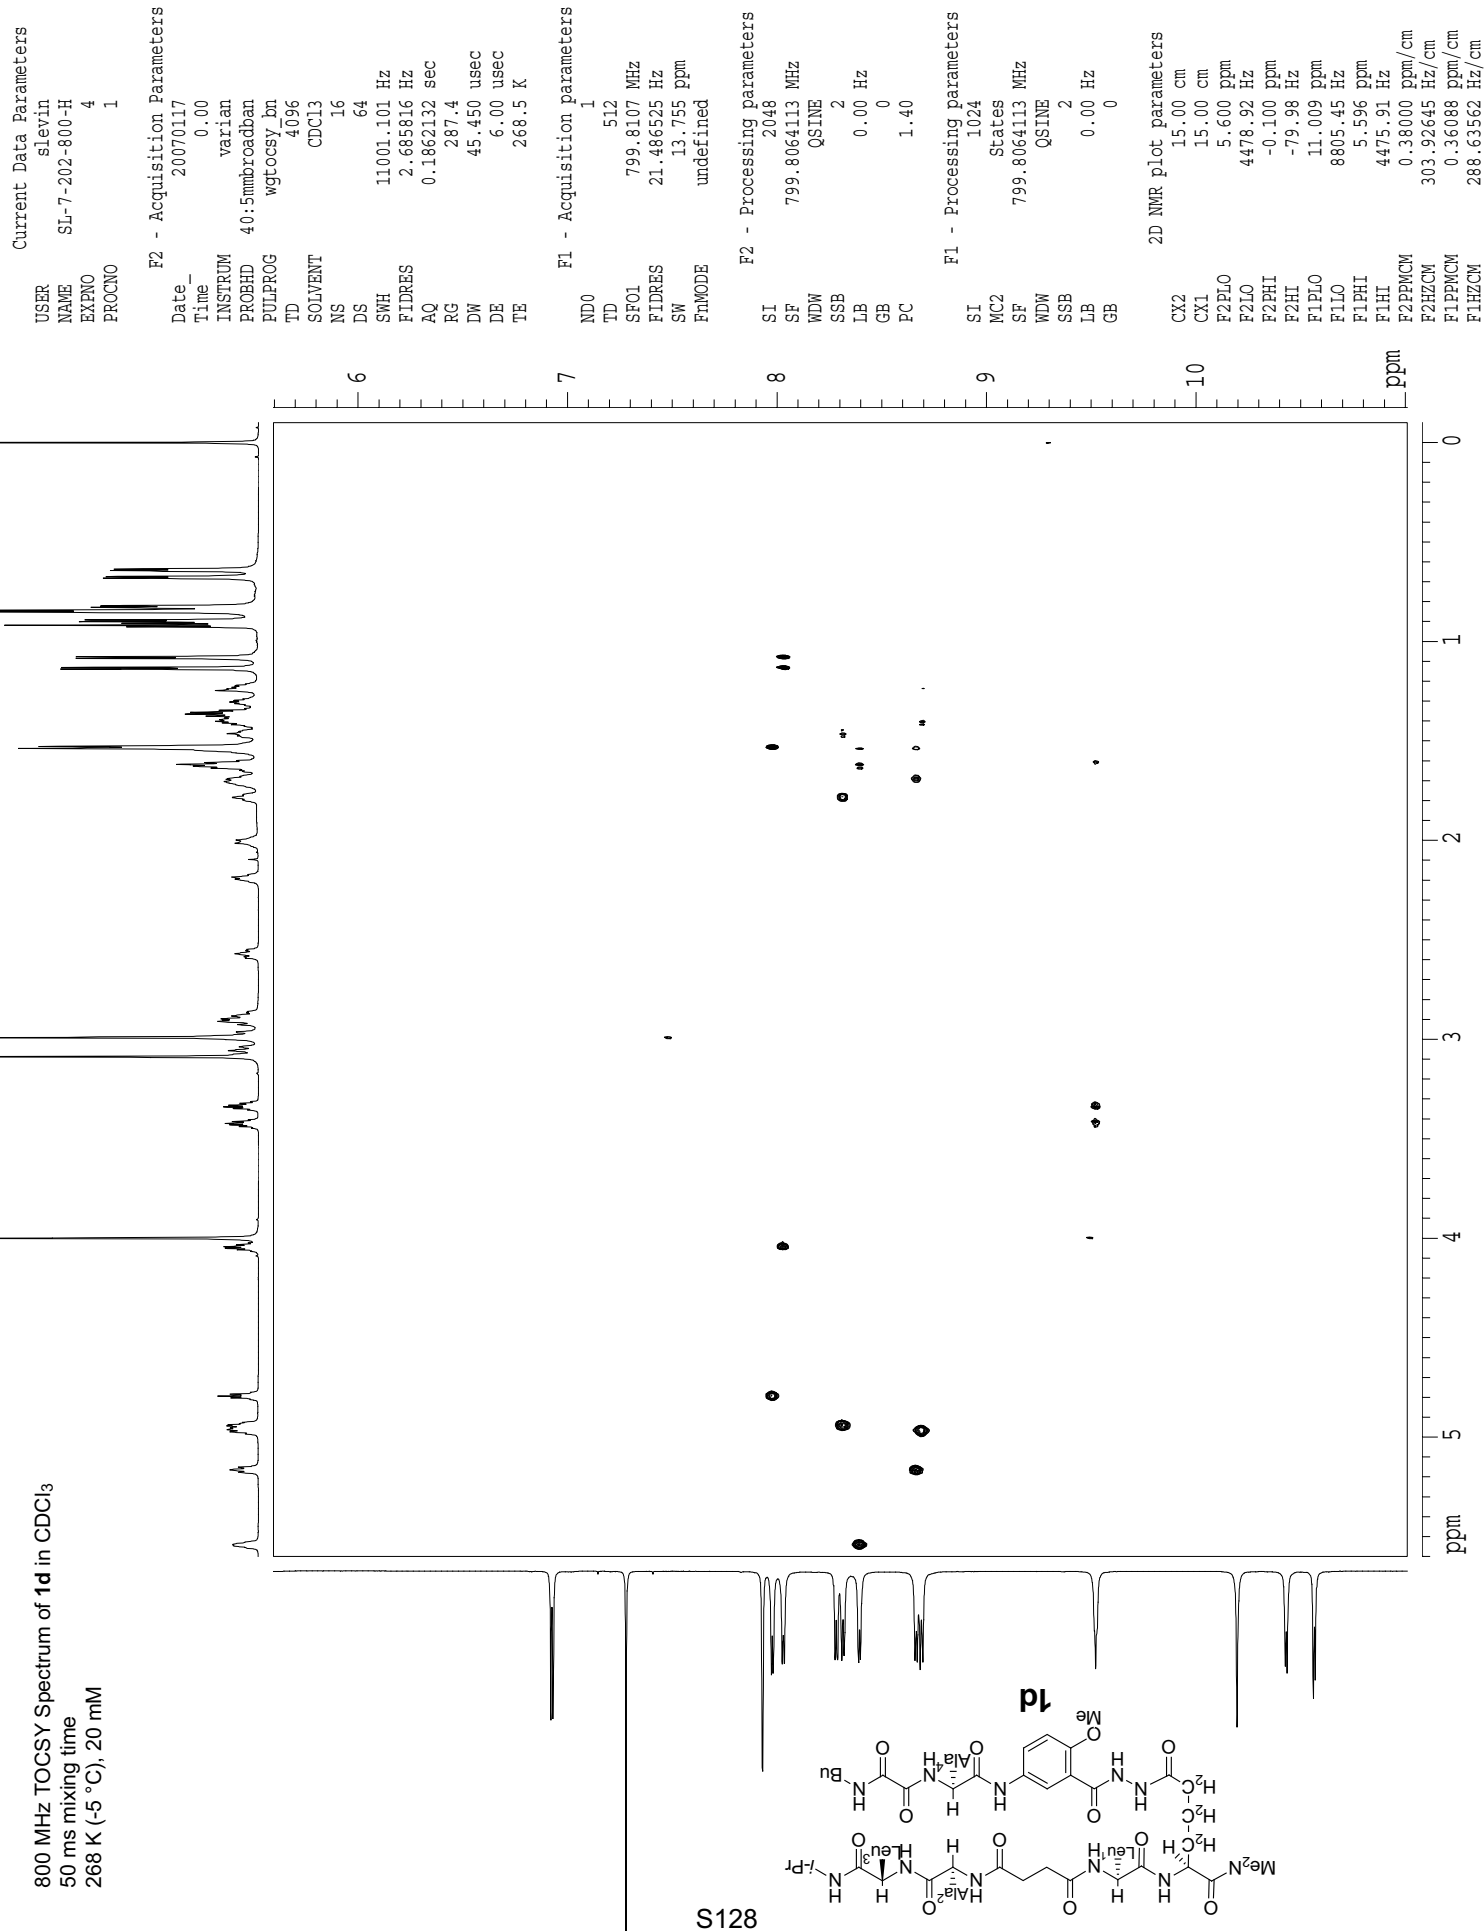



800 MHz TOCSY Spectrum of **1d** in CDCl<sub>3</sub>  
 50 ms mixing time  
 268 K (-5 °C), 20 mM

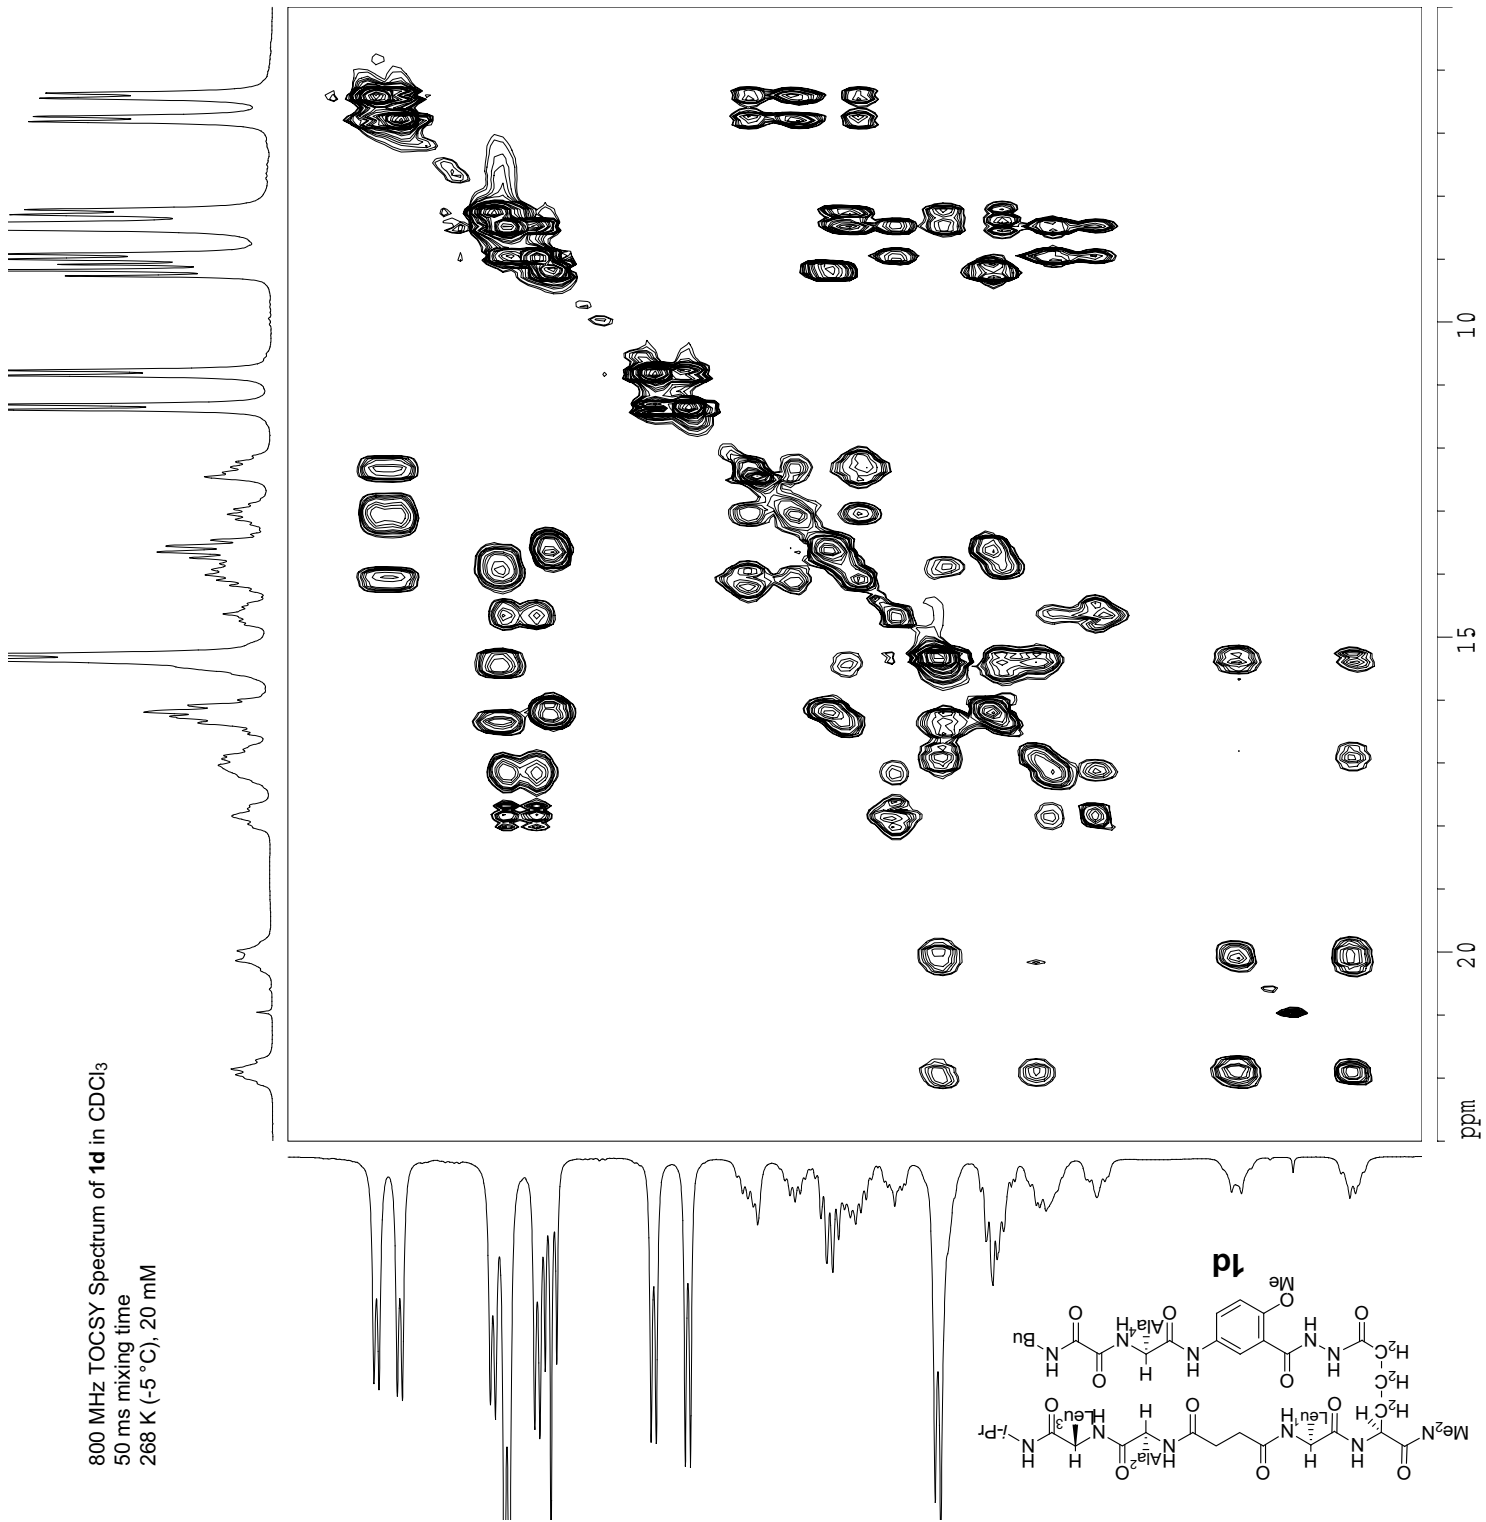

Current Data Parameters  
 USER slewin  
 NAME SL-7-202-800-H  
 EXPNO 4  
 PROCNO 1

F2 - Acquisition Parameters

Date\_ 20070117  
 Time\_ 0.00  
 INSTRUM varian  
 PROBHD 40:5mm broadband  
 PULPROG wgtocsy\_bn  
 TD 4096  
 SOLVENT CDCl3  
 NS 16  
 DS 64  
 SWH 11001.101 Hz  
 FIDRES 2.685816 Hz  
 AQ 0.1862132 sec  
 RG 287.4  
 DW 45.450 usec  
 DE 6.00 usec  
 TE 268.5 K

F1 - Acquisition Parameters

ND0 1  
 TD 512  
 SF01 799.8107 MHz  
 FIDRES 21.486525 Hz  
 SW 13.755 ppm  
 FwMODE undefined

F2 - Processing parameters

SI 2048  
 SF 799.8064113 MHz  
 WDW QSSINE  
 SSB 2  
 LB 0.00 Hz  
 GB 0  
 PC 1.40

F1 - Processing parameters

SI 1024  
 MC2 States  
 SF 799.8064113 MHz  
 WDW QSSINE  
 SSB 2  
 LB 0.00 Hz  
 GB 0

2D NMR plot parameters

S. Levin and J. S. Nowick  
 CX2 15.00 cm  
 CX1 15.00 cm  
 F2FLO 2.300 ppm  
 F2LO 1839.55 Hz  
 F2PHI 0.500 ppm  
 F2HI 399.90 Hz  
 F1FLO 2.300 ppm  
 F1LO 1839.55 Hz  
 F1PHI 0.500 ppm  
 F1HI 399.90 Hz  
 F2PPMCM 0.12000 ppm/cm  
 F2HZCM 95.97677 Hz/cm  
 F1PPMCM 0.12000 ppm/cm  
 F1HZCM 95.97677 Hz/cm

800 MHz NOESY Spectrum of **1d** in CDCl<sub>3</sub>  
400 ms mixing time  
268 K (-5 °C), 20 mM

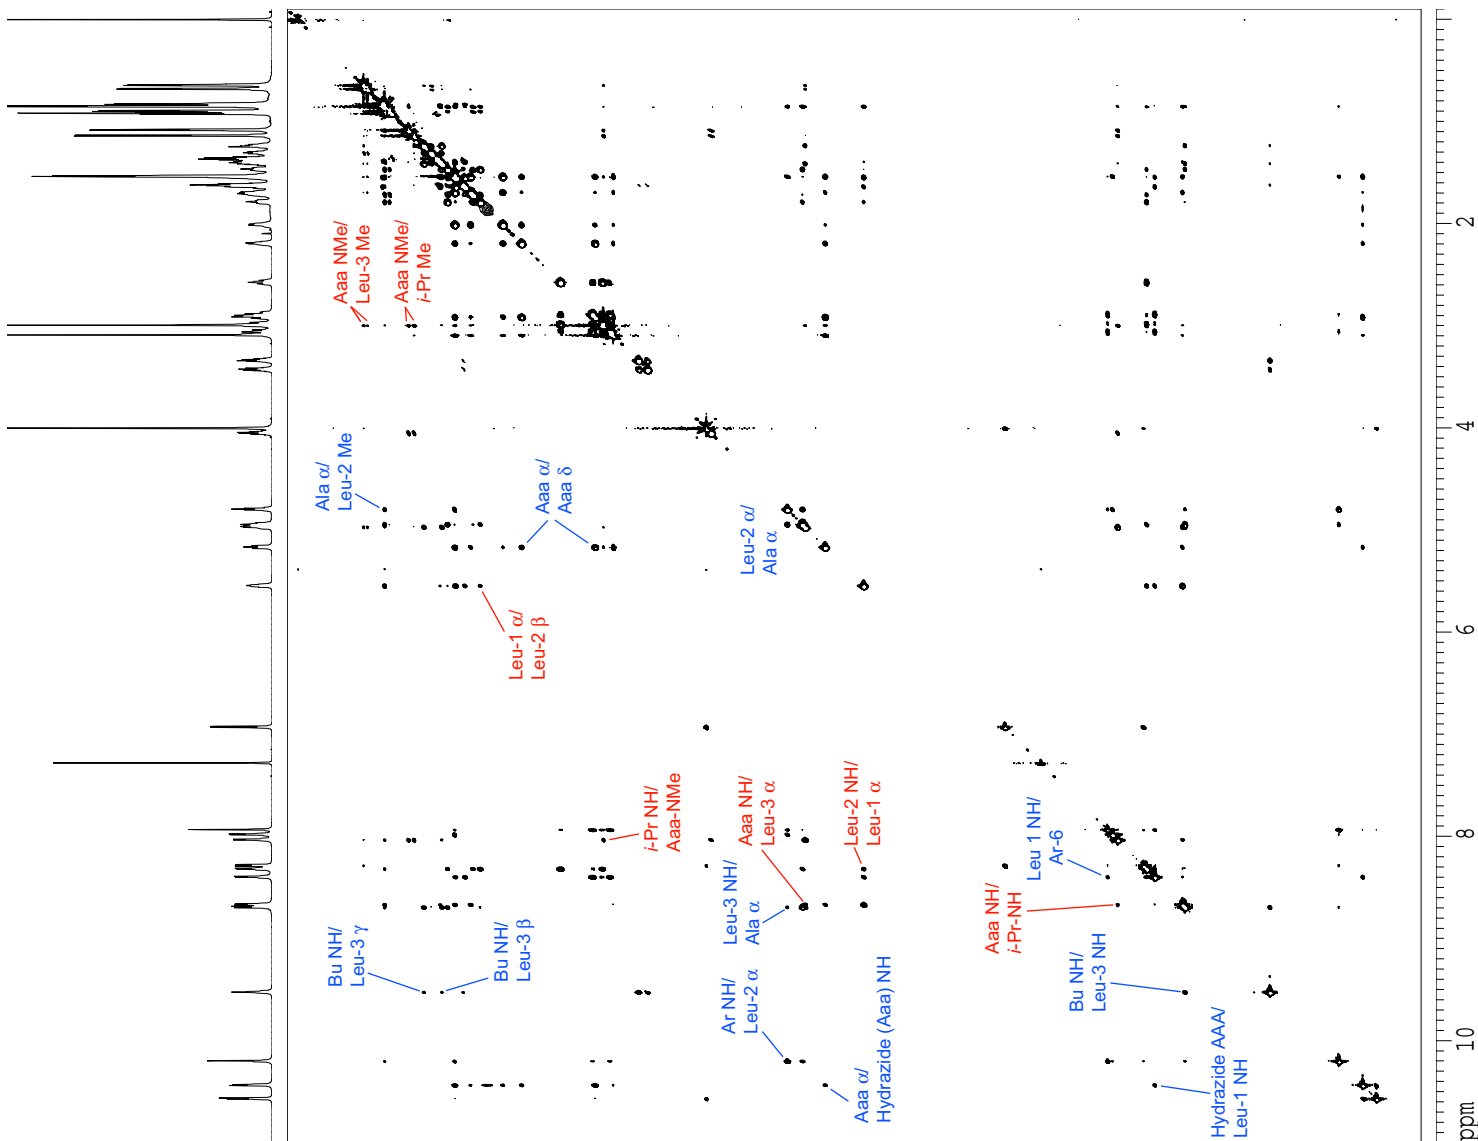

Current Data Parameters  
USER slevin  
NAME SL-7-202-800-H  
EXPNO 5  
PROCNO 1

F2 - Acquisition Parameters  
Date\_ 20070117  
Time 0.00  
INSTRUM varian  
PROBHD 40:5mmrbroadban  
PULPROG noesyh2o\_pfg 800 p1p2  
TD 4096  
SOLVENT CDCl3  
NS 16  
DS 64  
SWH 11001.101 Hz  
FIDRES 2.685816 Hz  
AQ 0.1862132 sec  
RG 128  
DW 45.450 usec  
DE 6.00 usec  
TE 268.5 K

F1 - Acquisition Parameters  
ND0 1  
TD 1024  
SF01 799.8107 MHz  
FIDRES 10.743262 Hz  
SW 13.755 ppm  
FMODE undefined

F2 - Processing parameters  
SI 4096  
SF 799.8064113 MHz  
WDW QSSINE  
SSB 2  
LB 0.00 Hz  
GB 0  
PC 1.40

F1 - Processing parameters  
SI 2048  
MC2 States  
SF 799.8064113 MHz  
WDW QSSINE  
SSB 2  
LB 0.00 Hz  
GB 0

2D NMR plot parameters  
CX2 15.00 cm  
CX1 15.00 cm  
F2PLO 10.734 ppm  
F2LO 8585.21 Hz  
F2PHI 7.789 ppm  
F2PHI 6229.75 Hz  
F1PLO 5.771 ppm  
F1LO 4615.58 Hz  
F1PHI 3.890 ppm  
F1HI 3111.52 Hz  
F2PPMCM 0.19634 ppm/cm  
F2HZCM 157.03067 Hz/cm  
F1PPMCM 0.12537 ppm/cm  
F1HZCM 100.27044 Hz/cm

S. Levin and J. M. Swick

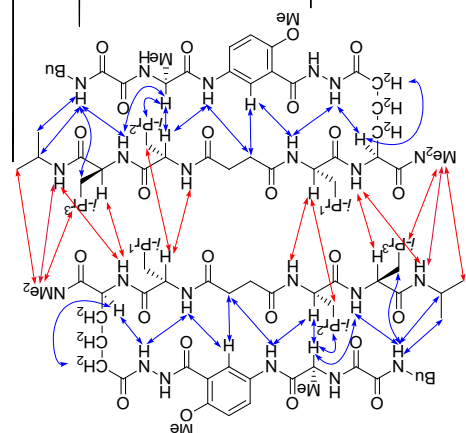

800 MHz NOESY Spectrum of **1d** in CDCl<sub>3</sub>  
 400 ms mixing time  
 268 K (-5 °C), 20 mM

Current Data Parameters  
 USER slevin  
 NAME SL-7-202-800-H  
 EXPNO 5  
 PROCNO 1

F2 - Acquisition Parameters  
 Date\_ 20070117  
 Time\_ 0.00  
 INSTRUM varian  
 PROBHD 40:5mmrbroadban  
 PULPROG noesyh2o\_pfg\_800\_pln  
 TD 4096  
 SOLVENT CDCl3  
 NS 16  
 DS 64  
 SWH 11001.101 Hz  
 FIDRES 2.685816 Hz  
 AQ 0.1862132 sec  
 RG 128  
 DW 45.450 usec  
 DE 6.00 usec  
 TE 268.5 K

F1 - Acquisition parameters  
 ND0 1  
 TD 1024  
 SF01 799.8107 MHz  
 FIDRES 10.743262 Hz  
 SW 13.755 ppm  
 FRMODE undefined

F2 - Processing parameters  
 SI 4096  
 SF 799.8064113 MHz  
 WDW QSIINE  
 SSB 2  
 LB 0.00 Hz  
 GB 0  
 PC 1.40

F1 - Processing parameters  
 SI 2048  
 MC2 States  
 SF 799.8064113 MHz  
 WDW QSIINE  
 SSB 2  
 LB 0.00 Hz  
 GB 0

2D NMR plot parameters  
 CX2 15.00 cm  
 CX1 15.00 cm  
 F2PLO 5.600 ppm  
 F2LO 4478.92 Hz  
 F2PHI -0.100 ppm  
 F2HI -79.98 Hz  
 F1PLO 5.600 ppm  
 F1LO 4478.92 Hz  
 F1PHI -0.100 ppm  
 F1HI -79.98 Hz  
 F2PPMCM 0.38000 ppm/cm  
 F2HZCM 303.92645 Hz/cm  
 F1PPMCM 0.38000 ppm/cm  
 F1HZCM 303.92645 Hz/cm

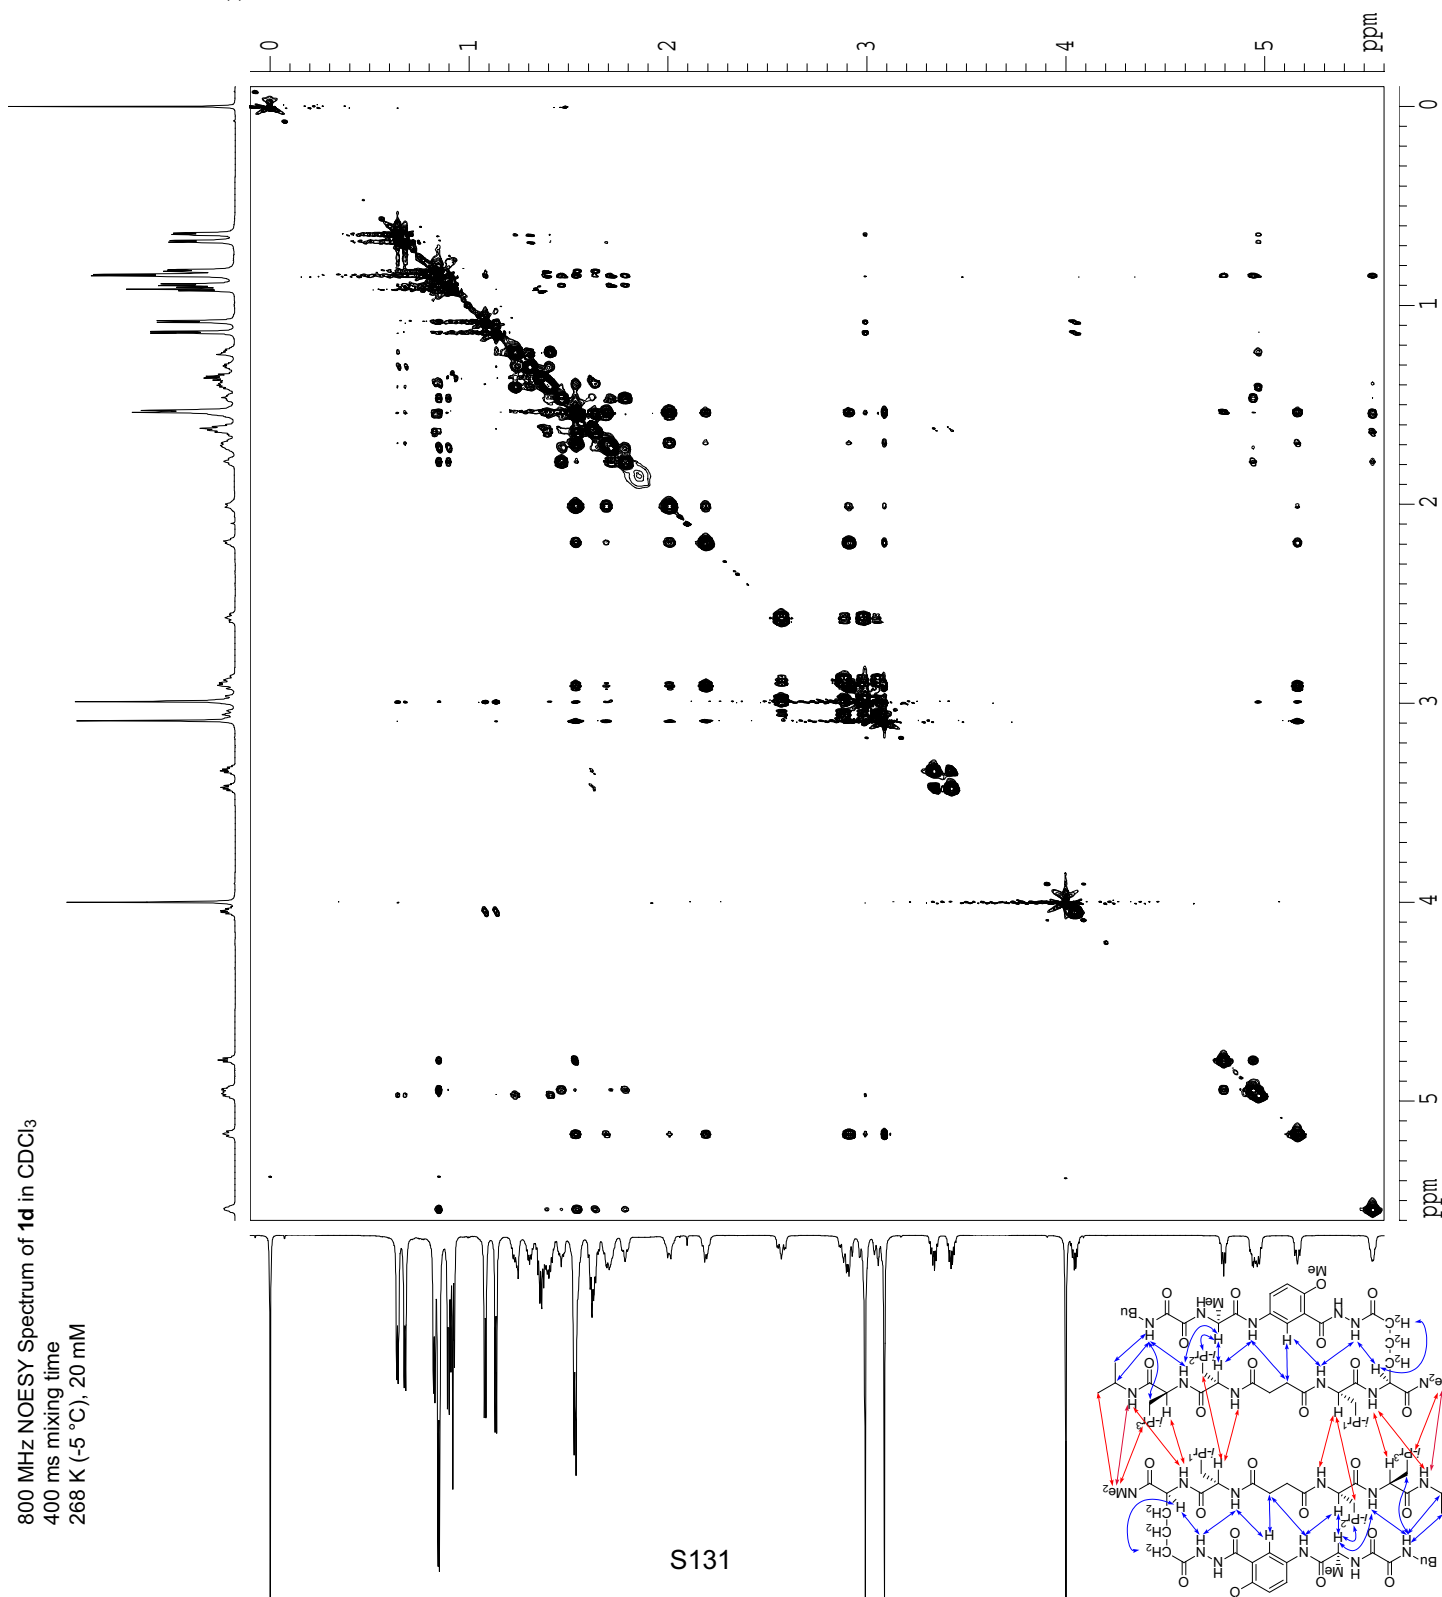

Supporting Information

S. Levin and J. S. Nowick

Current Data Parameters  
 USER slevin  
 NAME SL-7-202-800-H  
 EXPNO 5  
 PROCNO 1

F2 - Acquisition Parameters

Date 20070117  
 Time 0.00  
 INSTRUM varian  
 PROBHD 40:5mm broadband  
 PULPROG noesyh2o\_pfg\_800\_pln  
 TD 4096  
 SOLVENT CDCl3  
 NS 16  
 DS 64  
 SWH 11001.101 Hz  
 FIDRES 2.685816 Hz  
 AQ 0.1862132 sec  
 RG 128  
 DW 45.450 usec  
 DE 6.00 usec  
 TE 268.5 K

F1 - Acquisition Parameters

ND0 1  
 TD 1024  
 SFO1 799.8107 MHz  
 FIDRES 10.743262 Hz  
 SW 13.755 ppm  
 FRMODE undefined

F2 - Processing parameters

SI 4096  
 SF 799.8064113 MHz  
 WDW QSI  
 SSB 2  
 LB 0.00 Hz  
 GB 0  
 PC 1.40

F1 - Processing parameters

SI 2048  
 MC2 States  
 SF 799.8064113 MHz  
 WDW QSI  
 SSB 2  
 LB 0.00 Hz  
 GB 0

2D NMR plot parameters

CX2 15.00 cm  
 CX1 15.00 cm  
 F2PLO 11.000 ppm  
 F2LO 8797.87 Hz  
 F2PHI 5.600 ppm  
 F2HI 4478.92 Hz  
 F1PLO 5.603 ppm  
 F1LO 4481.28 Hz  
 F1PHI -0.106 ppm  
 F1HI -84.60 Hz  
 F2PPMCM 0.36000 ppm/cm  
 F2HZCM 287.93030 Hz/cm  
 F1PPMCM 0.38058 ppm/cm  
 F1HZCM 304.39243 Hz/cm

800 MHz NOESY Spectrum of **1d** in CDCl<sub>3</sub>  
 400 ms mixing time  
 268 K (-5 °C), 20 mM

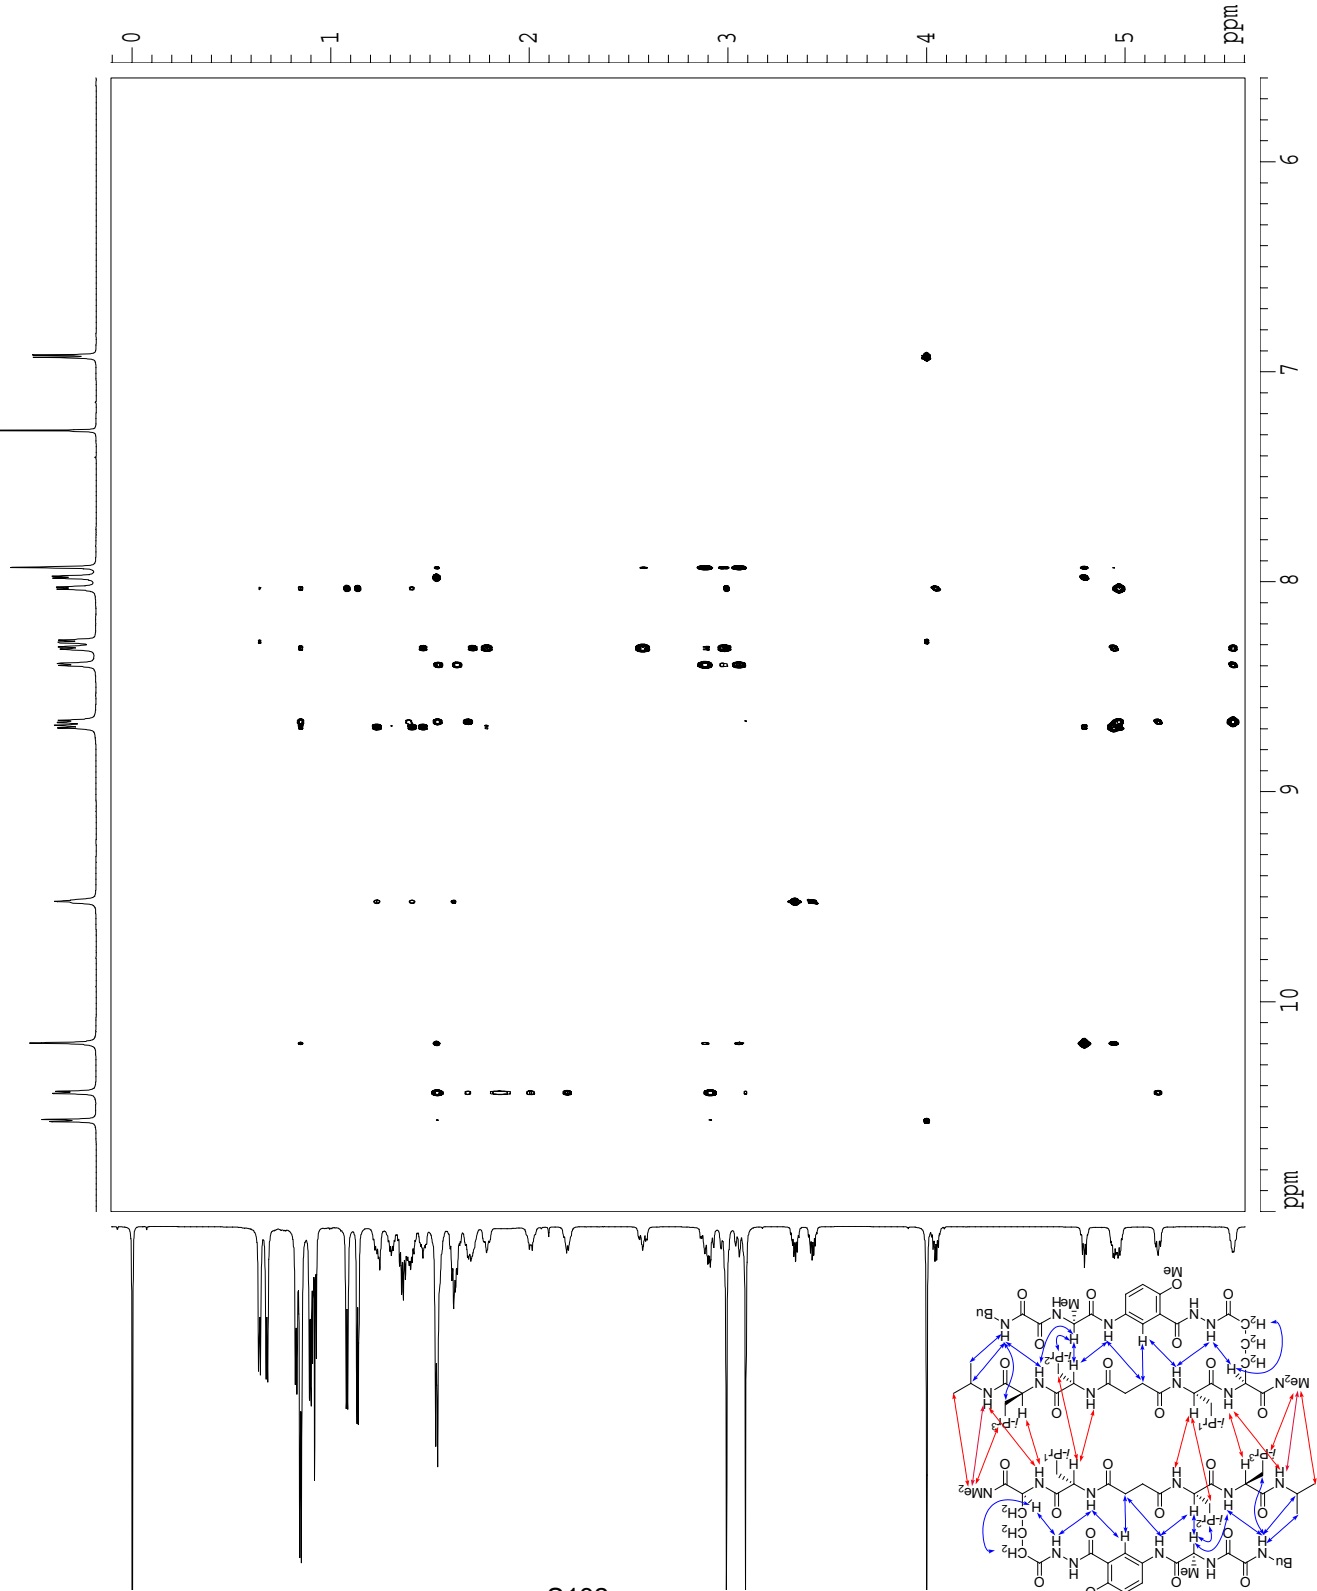

Current Data Parameters  
 USER slevin  
 NAME SL-7-202-800-H  
 EXPNO 5  
 PROCNO 1

## F2 - Acquisition Parameters

Date\_ 20070117  
 Time 0.00  
 INSTRUM varian  
 PROBDH 40:5mmbrdaban  
 PULPROG noesyh2o\_pfg\_800\_pln  
 TD 4096  
 SOLVENT CDCl3  
 NS 16  
 DS 64  
 SWH 11001.101 Hz  
 FIDRES 2.685816 Hz  
 AQ 0.1862132 sec  
 RG 128  
 DW 45.450 usec  
 DE 6.00 usec  
 TE 288.5 K

## F1 - Acquisition Parameters

ND0 1  
 TD 1024  
 SFO1 799.8107 MHz  
 FIDRES 10.743262 Hz  
 SW 13.755 ppm  
 FMODE undefined

## F2 - Processing parameters

SI 4096  
 SF 799.8064113 MHz  
 WDW QSI  
 SSB 2  
 LB 0.00 Hz  
 GB 0  
 PC 1.40

## F1 - Processing parameters

SI 2048  
 MC2 States  
 SF 799.8064113 MHz  
 WDW QSI  
 SSB 2  
 LB 0.00 Hz  
 GB 0

## 2D NMR plot parameters

CX2 15.00 cm  
 CX1 15.00 cm  
 F2PLO 11.003 ppm  
 F2LO 8800.08 Hz  
 F2PHI 5.600 ppm  
 F2HI 4478.60 Hz  
 F1PLO 11.000 ppm  
 F1LO 8797.87 Hz  
 F1PHI 5.600 ppm  
 F1HI 4478.92 Hz  
 F2PMMCM 0.36021 ppm/cm  
 F2HZCM 288.09848 Hz/cm  
 F1PMMCM 0.36000 ppm/cm  
 F1HZCM 287.993030 Hz/cm

800 MHz NOESY Spectrum of **1d** in CDCl<sub>3</sub>  
 400 ms mixing time  
 268 K (-5 °C), 20 mM

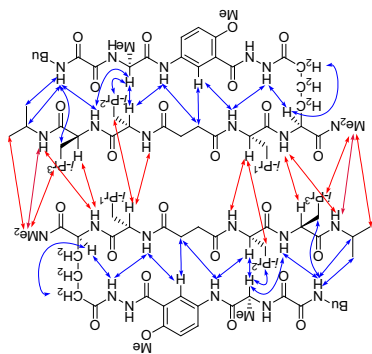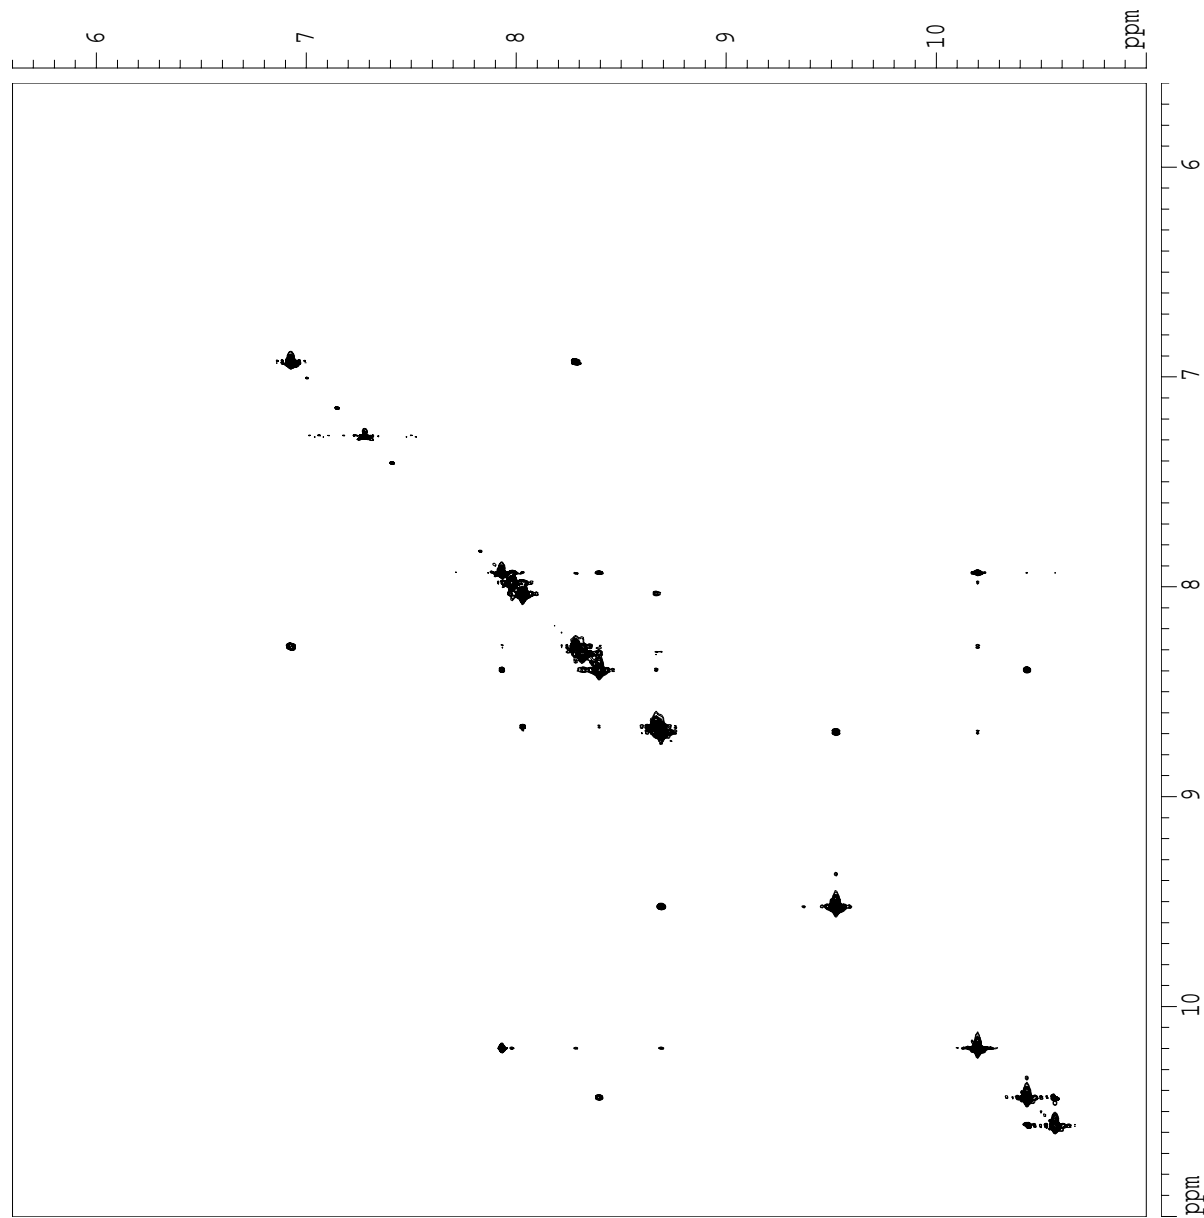

800 MHz NOESY Spectrum of **1d** in CDCl<sub>3</sub>  
 400 ms mixing time  
 268 K (-5 °C), 20 mM

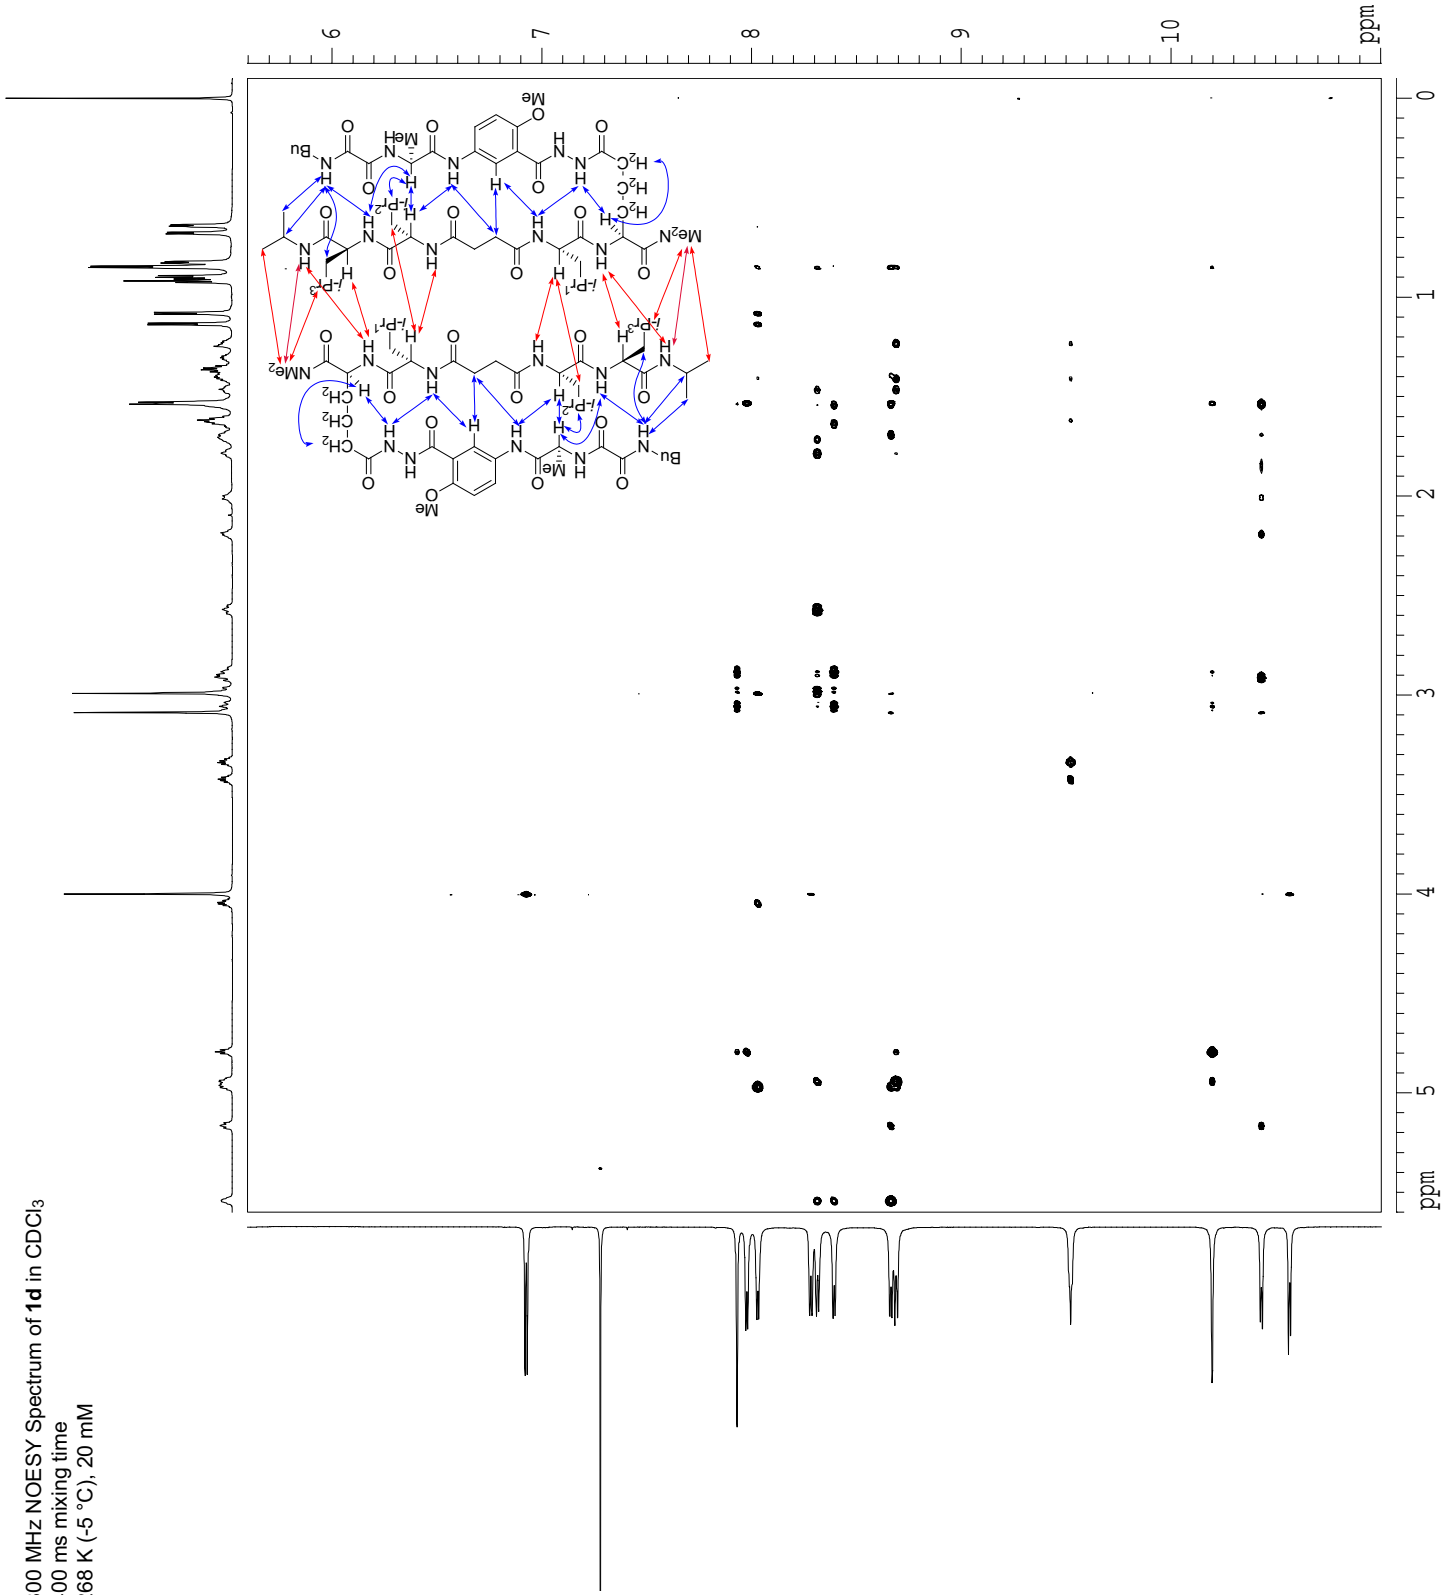

Current Data Parameters  
 USER slevin  
 NAME SL-7-202-800-H  
 EXPNO 5  
 PROCNO 1

F2 - Acquisition Parameters  
 Date\_ 20070117  
 Time 0.00  
 INSTRUM varian  
 PROBHD 40:5mmroadban  
 PULPROG noesyh2o\_pfg\_800\_p1n  
 TD 4096  
 SOLVENT CDCl3  
 NS 16  
 DS 64  
 SWH 11001.101 Hz  
 FIDRES 2.685816 Hz  
 AQ 0.1862132 sec  
 RG 128  
 DW 45.450 usec  
 DE 6.00 usec  
 TE 268.5 K

F1 - Acquisition parameters  
 ND0 1  
 TD 1024  
 SF01 799.8107 MHz  
 FIDRES 10.743262 Hz  
 SW 13.755 ppm  
 FwMODE undefined

F2 - Processing parameters  
 SI 4096  
 SF 799.8064113 MHz  
 WDW QSI  
 SSB 2  
 LB 0.00 Hz  
 GB 0  
 PC 1.40

F1 - Processing parameters  
 SI 2048  
 MC2 States  
 SF 799.8064113 MHz  
 WDW QSI  
 SSB 2  
 LB 0.00 Hz  
 GB 0

2D NMR plot parameters  
 CX2 15.00 cm  
 CX1 15.00 cm  
 F2PLO 5.600 ppm  
 F2LO 4478.92 Hz  
 F2PHI -0.100 ppm  
 F2HT -79.98 Hz  
 F1PLO 11.003 ppm  
 F1LO 8800.08 Hz  
 F1PHI 5.596 ppm  
 F1HT 4475.91 Hz  
 F2PPMCM 0.38000 ppm/cm  
 F2HZCM 303.92645 Hz/cm  
 F1PPMCM 0.36043 ppm/cm  
 F1HZCM 288.27753 Hz/cm

800 MHz NOESY Spectrum of **1d** in CDCl<sub>3</sub>  
 400 ms mixing time  
 268 K (-5 °C), 20 mM

Supporting Information

Current Data Parameters  
 USER sleivin  
 NAME SL-7-202-800-H  
 EXPNO 5  
 PROCNO 1

F2 - Acquisition Parameters  
 Date\_ 20070117  
 Time 0.00  
 INSTRUM varian  
 PROBHD 40:5mm broadband  
 PULPROG noesyh2o\_prg\_800\_pln  
 TD 4096  
 SOLVENT CDCl<sub>3</sub>  
 NS 16  
 DS 64  
 SWH 11001.101 Hz  
 FIDRES 2.685816 Hz  
 AQ 0.1862132 sec  
 RG 128  
 DW 45.450 usec  
 DE 6.00 usec  
 TE 268.5 K

F1 - Acquisition Parameters  
 ND0 1  
 TD 1024  
 SF01 799.8107 MHz  
 FIDRES 10.743262 Hz  
 SW 13.755 ppm  
 FmMODE undefined

F2 - Processing parameters  
 SI 4096  
 SF 799.8064113 MHz  
 MDW QSIINE  
 SSB 2  
 LB 0.00 Hz  
 GB 0  
 PC 1.40

F1 - Processing parameters  
 SI 2048  
 MC2 States  
 SF 799.8064113 MHz  
 MDW QSIINE  
 SSB 2  
 LB 0.00 Hz  
 GB 0

2D NMR plot parameters  
 CX2 15.00 cm  
 CX1 15.00 cm  
 F2PLO 10.734 ppm  
 F2LO 8585.21 Hz  
 F2PHI 7.789 ppm  
 F2ZHI 6229.75 Hz  
 F1PLO 5.771 ppm  
 F1LO 4615.58 Hz  
 F1PHI 3.890 ppm  
 F1ZHI 3111.52 Hz  
 F2PMMCM 0.19634 ppm/cm  
 F2HZCM 157.03067 Hz/cm  
 F1PMMCM 0.12537 ppm/cm  
 F1HZCM 100.27044 Hz/cm

S. Levin and J. S. Nowick

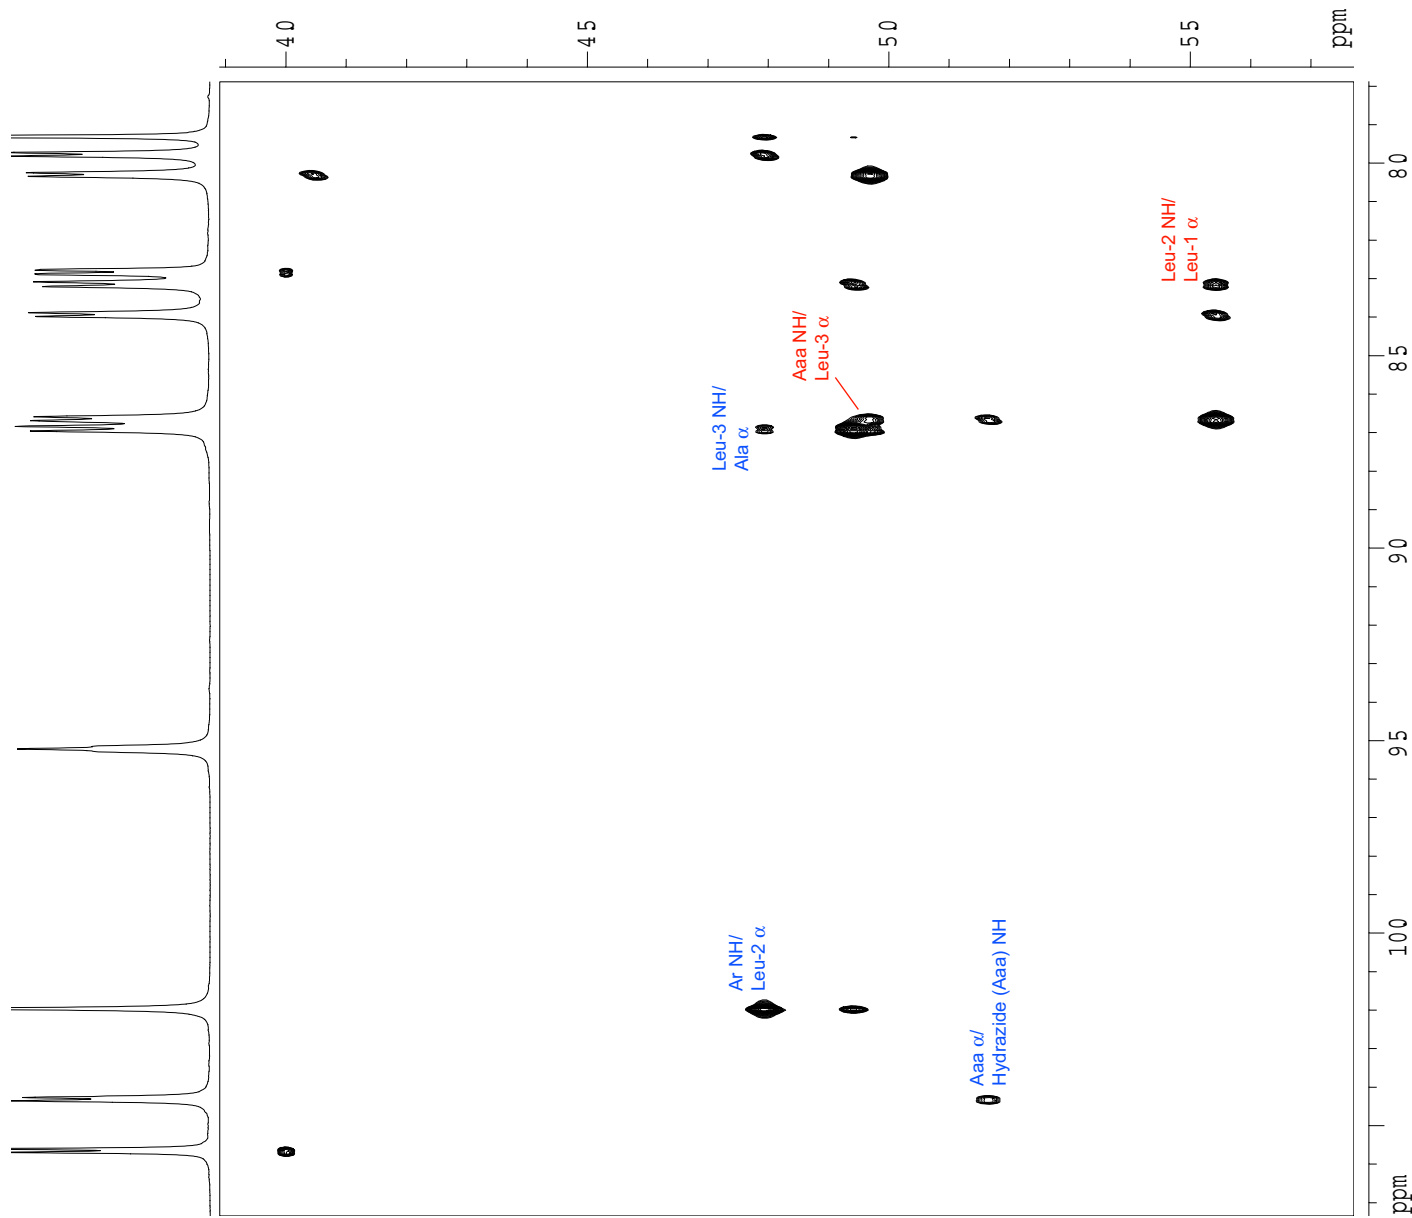

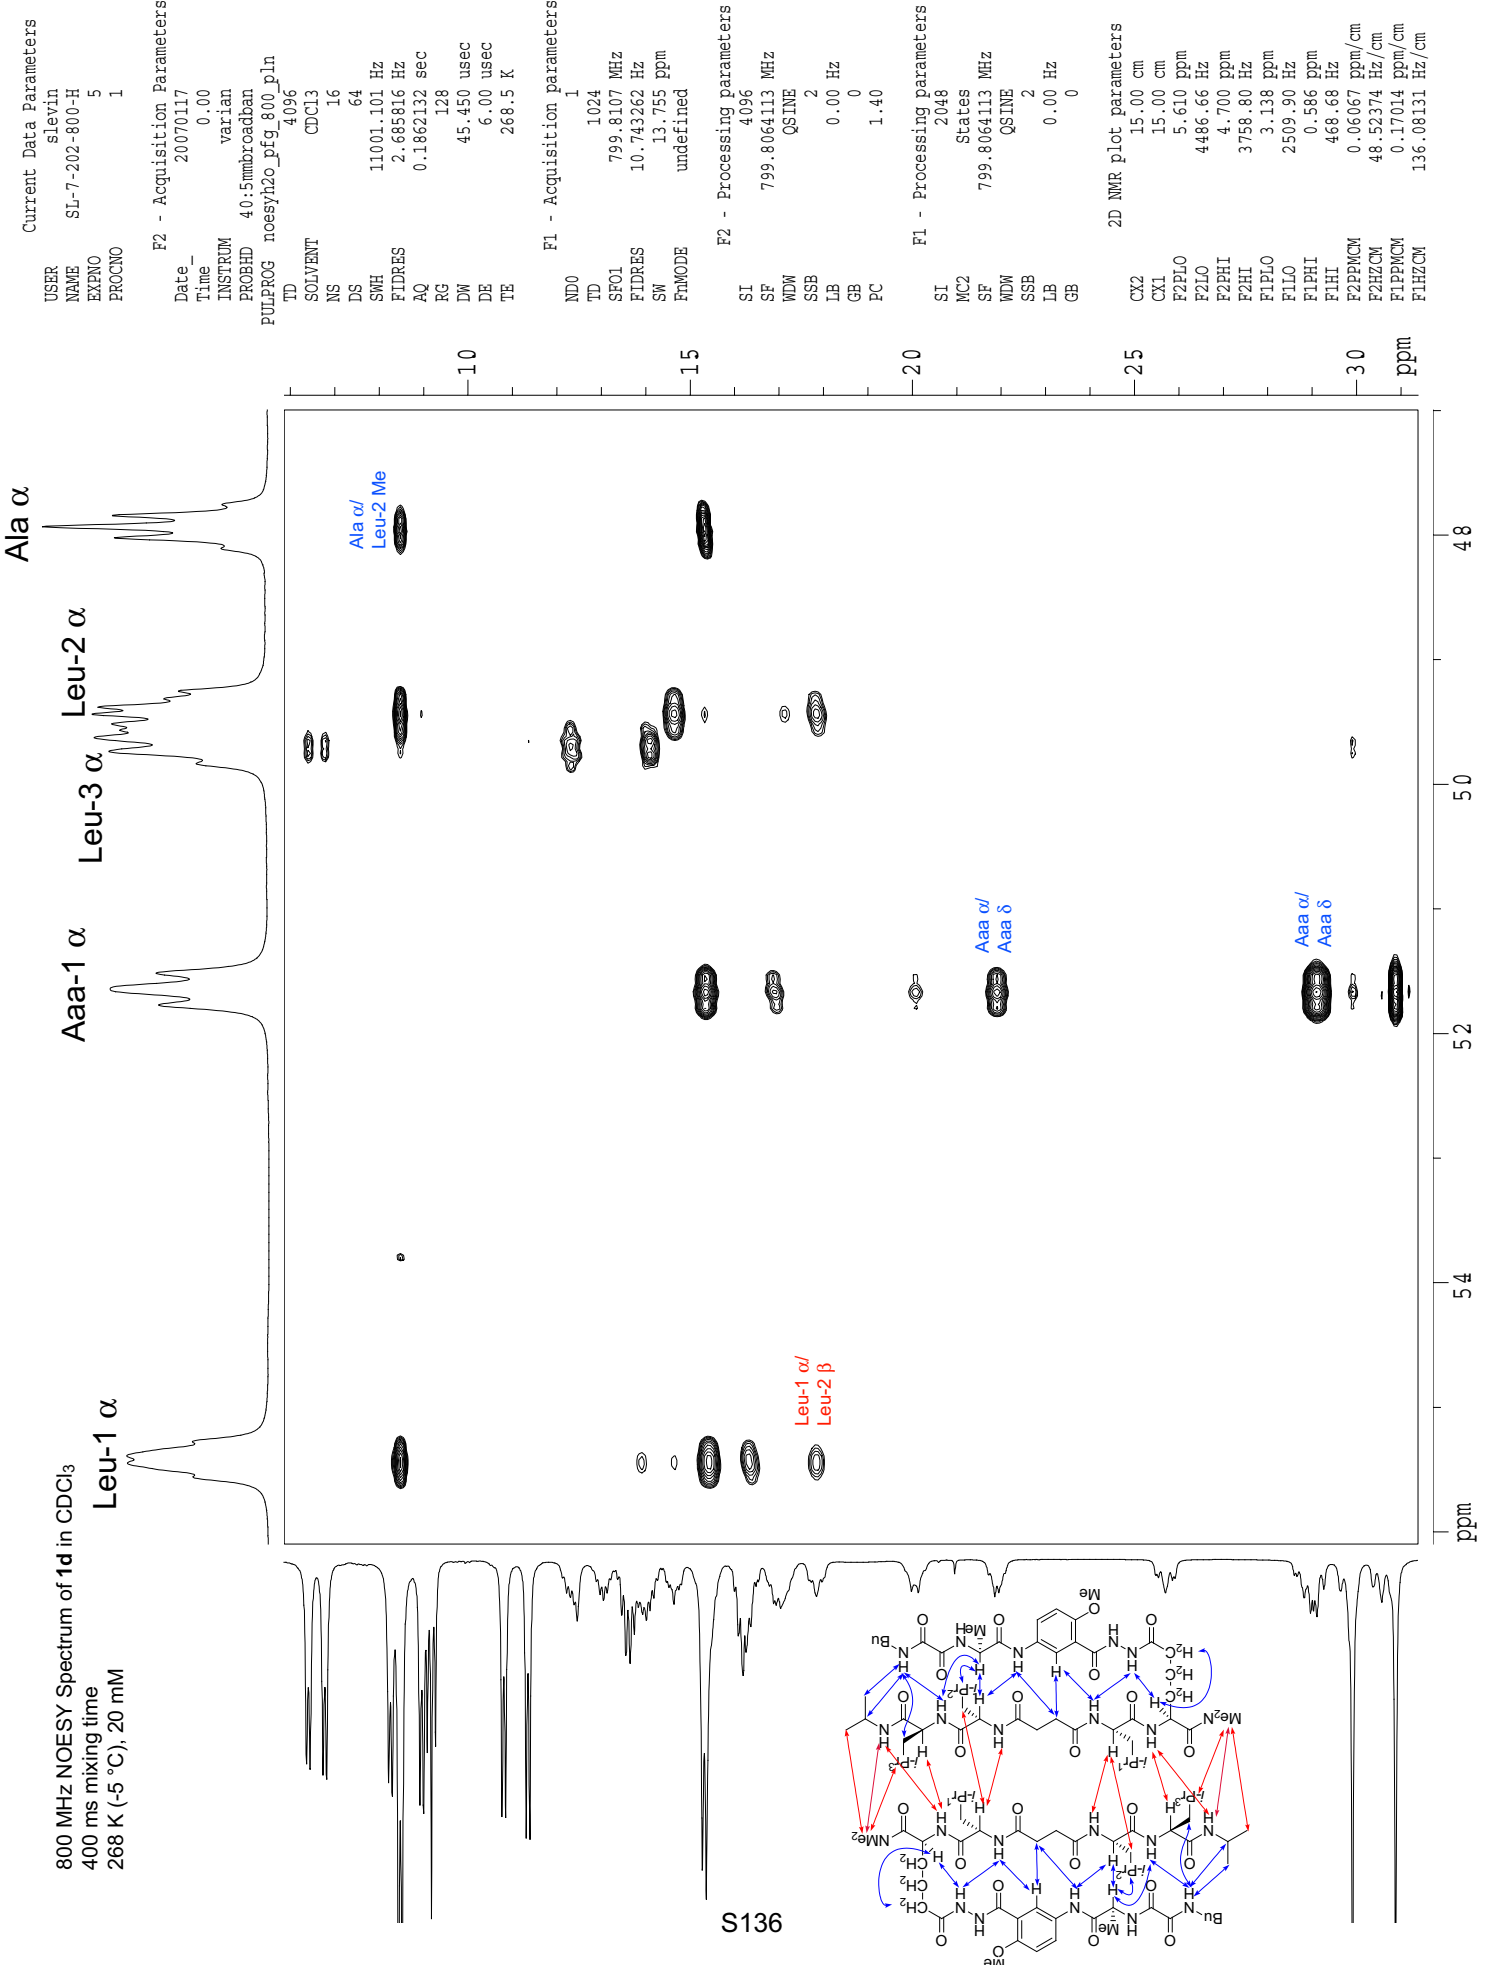



Supporting Information

Current Data Parameters

USER slewin  
 NAME SL-7-202-800-H  
 EXPNO 5  
 PROCNO 1

F2 - Acquisition Parameters

Date\_ 20070117  
 Time 0.00  
 INSTRUM varian  
 PROBHD 40:5mmroadban  
 PULPROG noesyh2o\_pfg\_800\_pln  
 TD 4096  
 SOLVENT CDCl3  
 NS 16  
 DS 64  
 SWH 11001.101 Hz  
 FIDRES 2.685816 Hz  
 AQ 0.1862132 sec  
 RG 128  
 DW 45.450 usec  
 DE 6.00 usec  
 TE 268.5 K

F1 - Acquisition parameters

ND0 1  
 TD 1024  
 SF01 799.8107 MHz  
 FIDRES 10.743262 Hz  
 SW 13.755 ppm  
 F1MODE undefined

F2 - Processing parameters

SI 4096  
 SF 799.8064113 MHz  
 WDW QSI  
 SSB 2  
 LB 0.00 Hz  
 GB 0  
 PC 1.40

800 MHz NOESY Spectrum of **1d** in CDCl<sub>3</sub>  
 400 ms mixing time  
 268 K (-5 °C), 20 mM

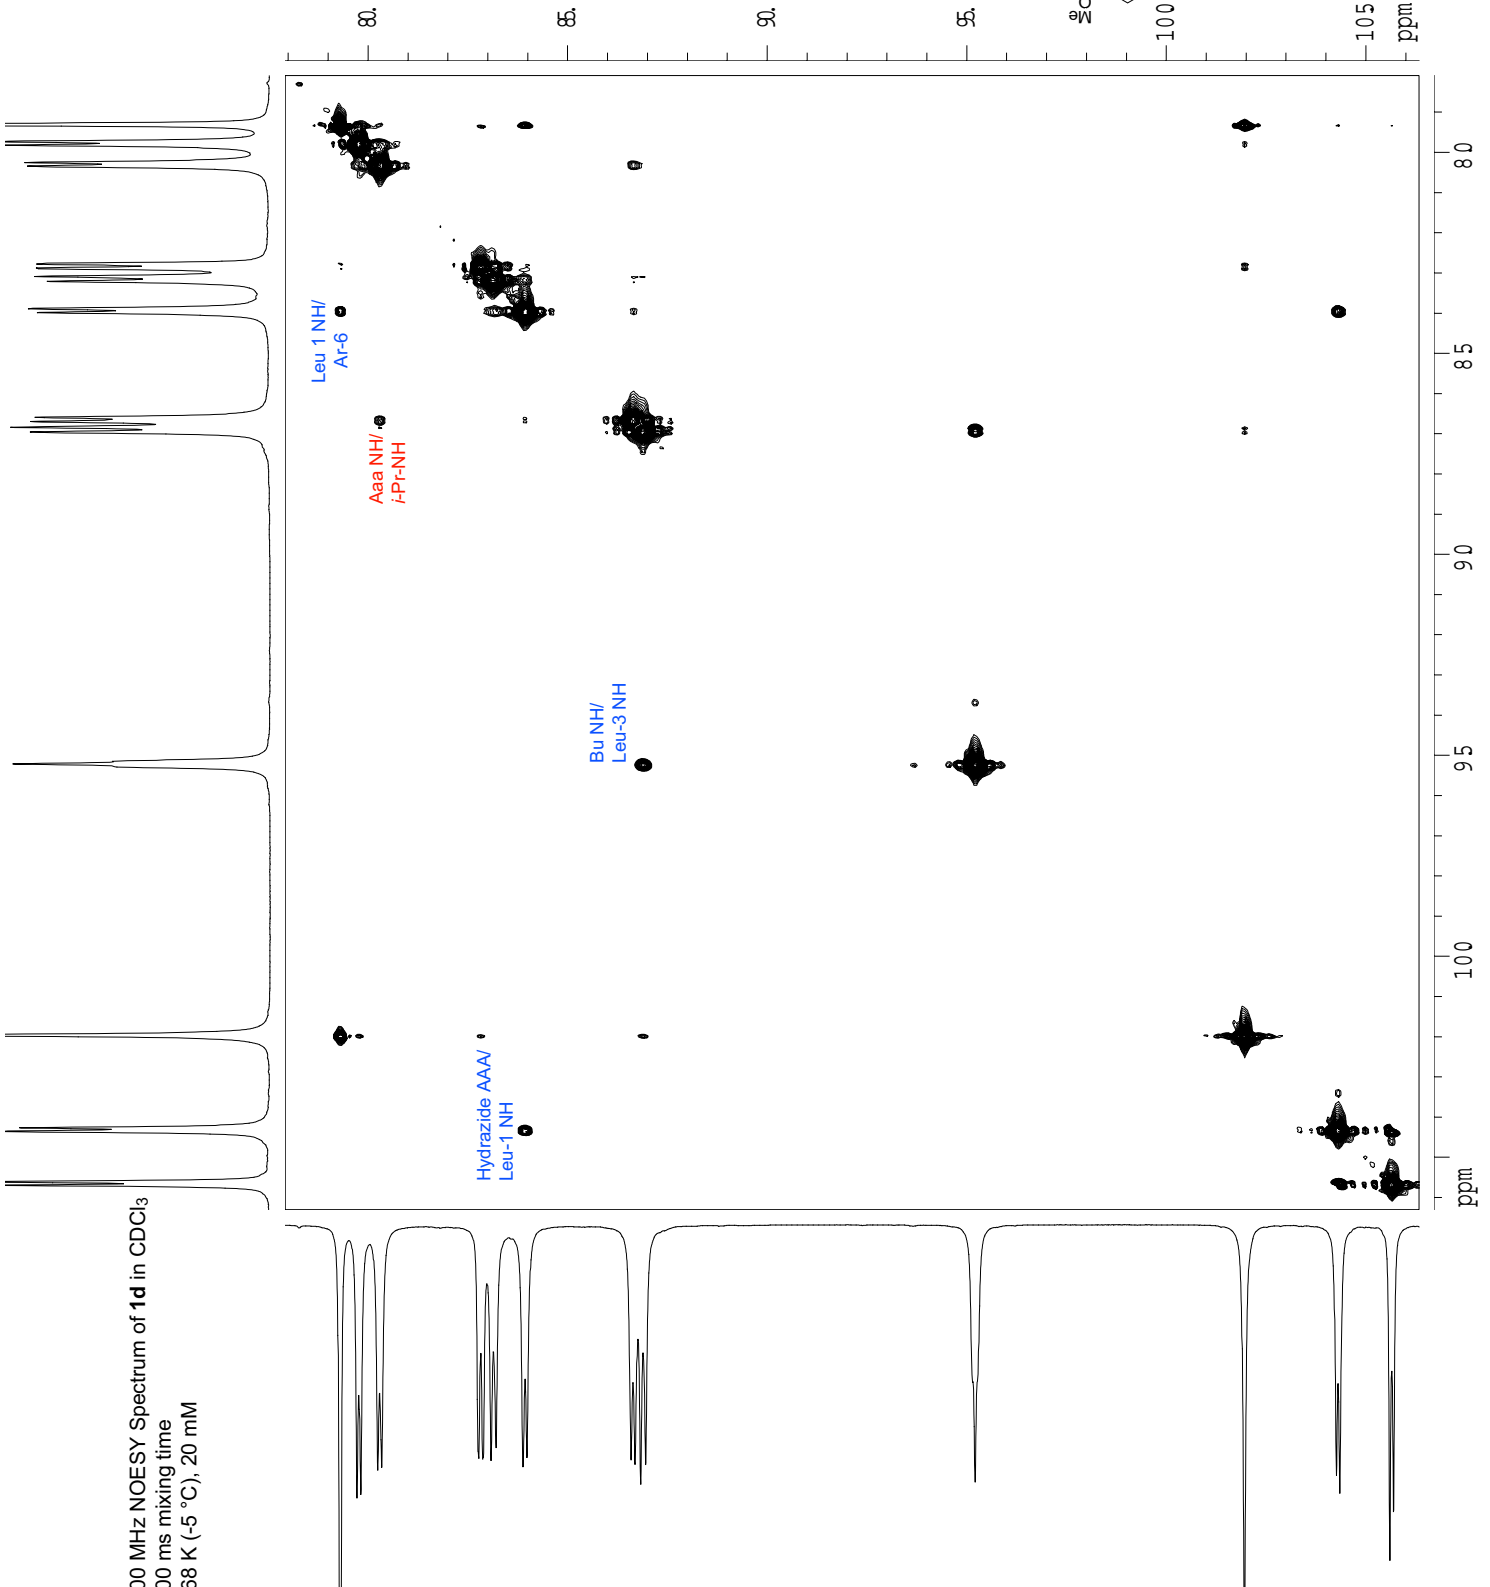

S. Levin and J. S. Nowick

800 MHz NOESY Spectrum of **1d** in CDCl<sub>3</sub>  
 400 ms mixing time  
 268 K (-5 °C), 20 mM

**Supporting Information**

Current Data Parameters  
 USER sLevin  
 NAME SL-7-202-800-H  
 EXPNO 5  
 PROCNO 1

F2 - Acquisition Parameters  
 Date\_ 20070117  
 Time 0:00  
 INSTRUM varian  
 PROBHD 40:5mmrbroadban  
 PULPROG noesyh2o\_pfg\_800\_pln  
 TD 4096  
 SOLVENT CDCl<sub>3</sub>  
 NS 16  
 DS 64  
 SWH 11001.101 Hz  
 FIDRES 2.685816 Hz  
 AQ 0.1862132 sec  
 RG 128  
 DW 45.450 usec  
 DE 6.00 usec  
 TE 268.5 K

F1 - Acquisition Parameters  
 ND0 1  
 TD 1024  
 SF01 799.8107 MHz  
 FIDRES 10.743262 Hz  
 SW 13.765 ppm  
 FreqMODE undefined

F2 - Processing parameters  
 SI 4096  
 SF 799.8064113 MHz  
 WDM QSINE  
 SSB 2  
 LB 0.00 Hz  
 GB 0  
 PC 1.40

F1 - Processing parameters  
 SI 2048  
 MC2 States  
 SF 799.8064113 MHz  
 WDM QSINE  
 SSB 2  
 LB 0.00 Hz  
 GB 0

2D NMR plot parameters  
 CX2 15.00 cm  
 CX1 15.00 cm  
 F2PLO 10.697 ppm  
 F2LO 8555.67 Hz  
 F2PHI 7.752 ppm  
 F2HI 6200.21 Hz  
 F1PLO 3.508 ppm  
 F1LO 2805.34 Hz  
 F1PHI 0.432 ppm  
 F1HI 345.13 Hz  
 F2PPMCM 0.19634 ppm/cm  
 F2HZCM 157.03067 Hz/cm  
 F1PPMCM 0.20507 ppm/cm  
 F1HZCM 164.01379 Hz/cm

S. Levin and J. Nowick

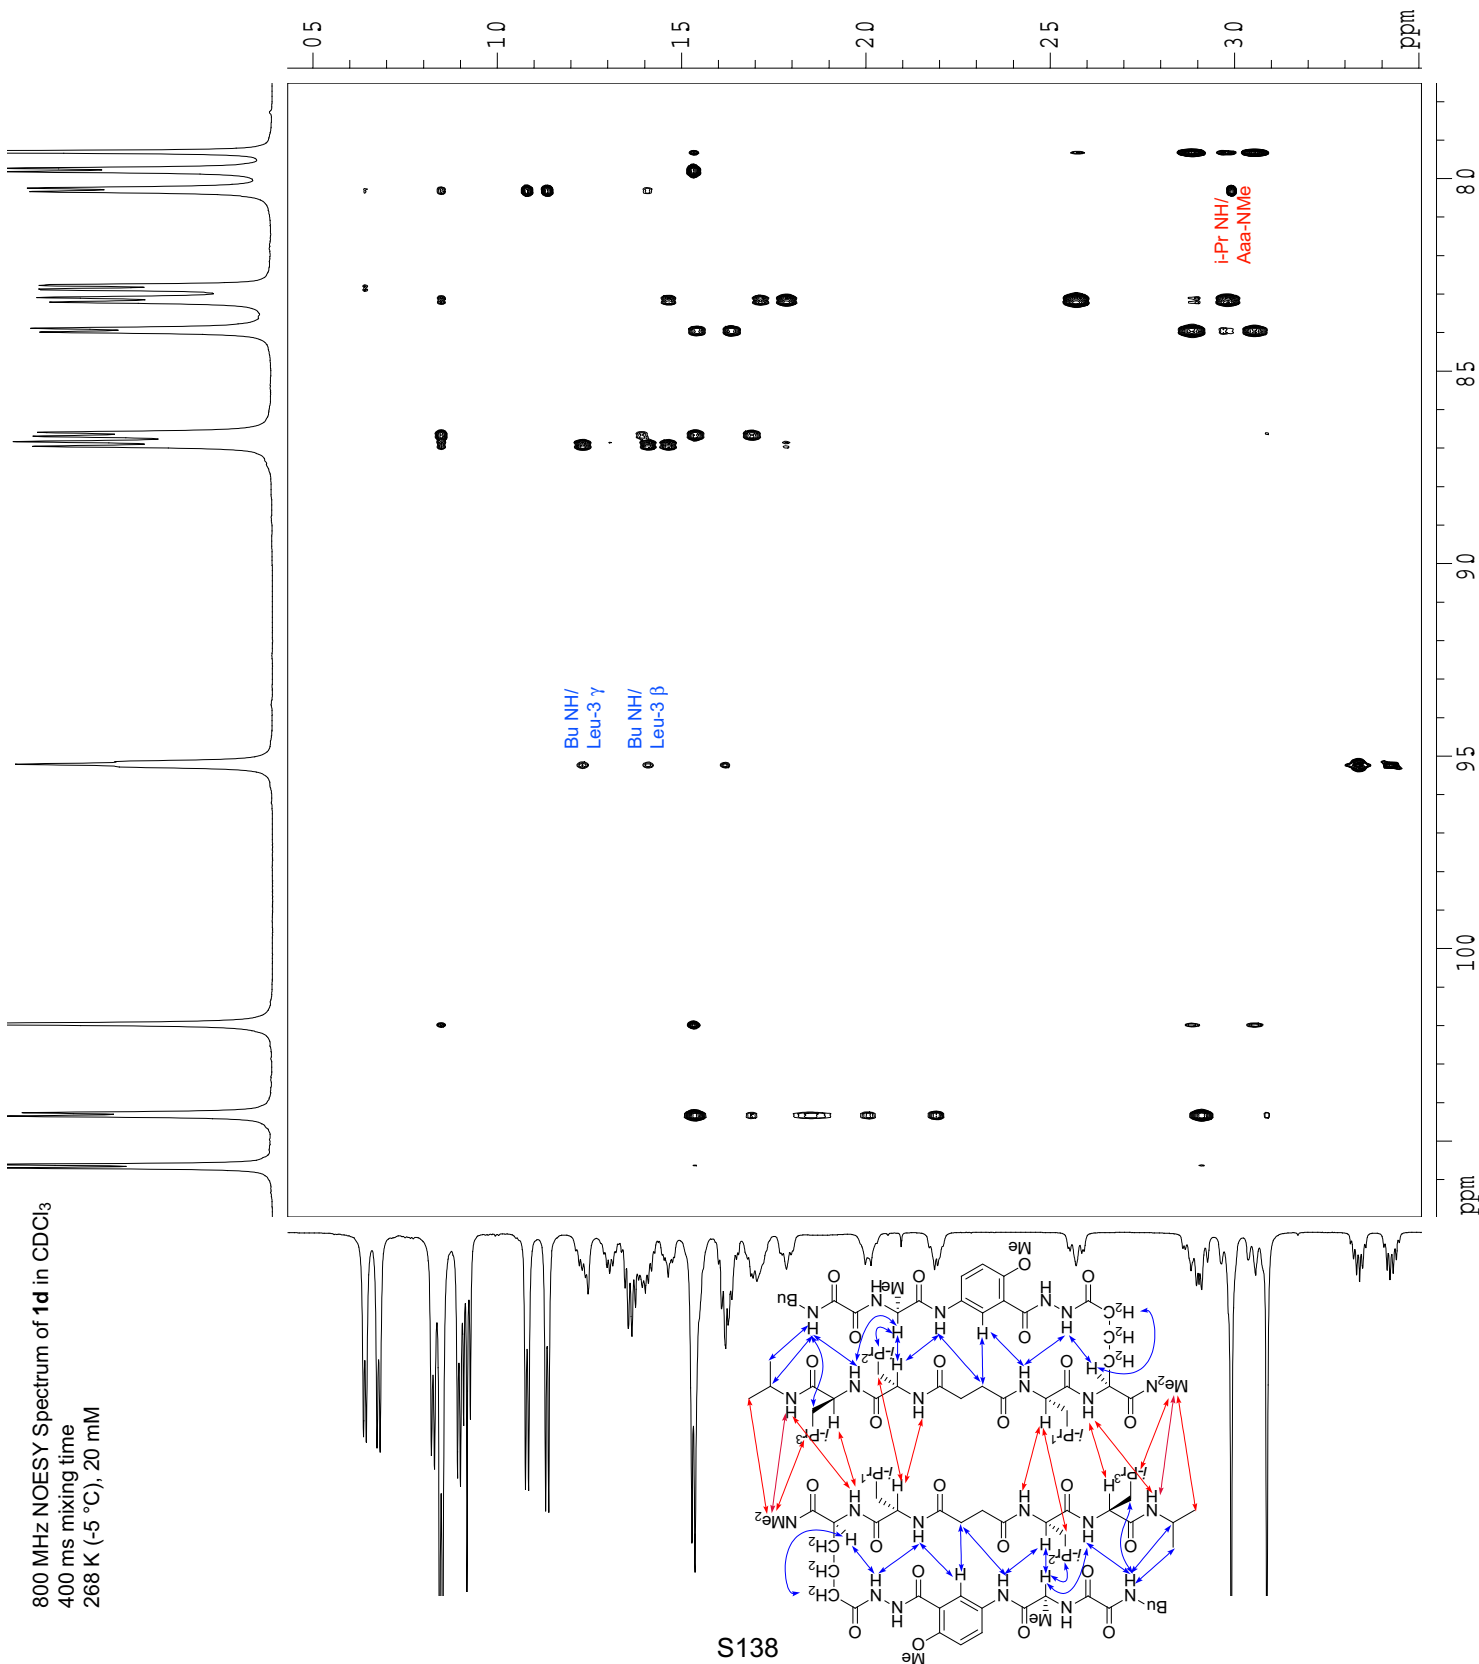

Supporting Information

Current Data Parameters  
 USER slevin  
 NAME SL-7-202-800-H  
 EXPNO 5  
 PROCNO 1

F2 - Acquisition Parameters

Date\_ 20070117  
 Time 0.00  
 INSTRUM varian  
 PROBDH 40:5mmbroadban  
 PULPROG noesyh2o\_pfg\_800\_pln  
 TD 4096

SOLVENT CDCL3  
 NS 16  
 DS 64  
 SMH 11001.101 Hz  
 FIDRES 2.685816 Hz  
 AQ 0.1862132 sec  
 RG 128  
 DW 45.450 usec  
 DE 6.00 usec  
 TE 268.5 K

F1 - Acquisition Parameters

ND0 1  
 TD 1024  
 SFO1 799.8107 MHz  
 FIDRES 10.743262 Hz  
 SW 13.755 ppm  
 FwMODE undefined

F2 - Processing Parameters

SI 4096  
 SF 799.8064113 MHz  
 WDW QSINE  
 SSB 2  
 LB 0.00 Hz  
 GB 0  
 PC 1.40

F1 - Processing Parameters

SI 2048  
 MC2 States  
 SF 799.8064113 MHz  
 WDW QSINE  
 SSB 2  
 LB 0.00 Hz  
 GB 0

2D NMR plot parameters

CX2 15.00 cm  
 CX1 15.00 cm  
 F2PLO 3.249 ppm  
 F2LO 2598.53 Hz  
 F2PHI 0.398 ppm  
 F2HI 318.27 Hz  
 F1PLO 3.252 ppm  
 F1LO 2601.21 Hz  
 F1PHI 0.411 ppm  
 F1HI 329.01 Hz  
 F2PPMCM 0.19007 ppm/cm  
 F2HZCM 152.01715 Hz/cm  
 F1PPMCM 0.18940 ppm/cm  
 F1HZCM 151.47998 Hz/cm

S. Levin and J. S. Nowick

800 MHz NOESY Spectrum of **1d** in CDCl<sub>3</sub>  
 400 ms mixing time  
 268 K (-5 °C), 20 mM

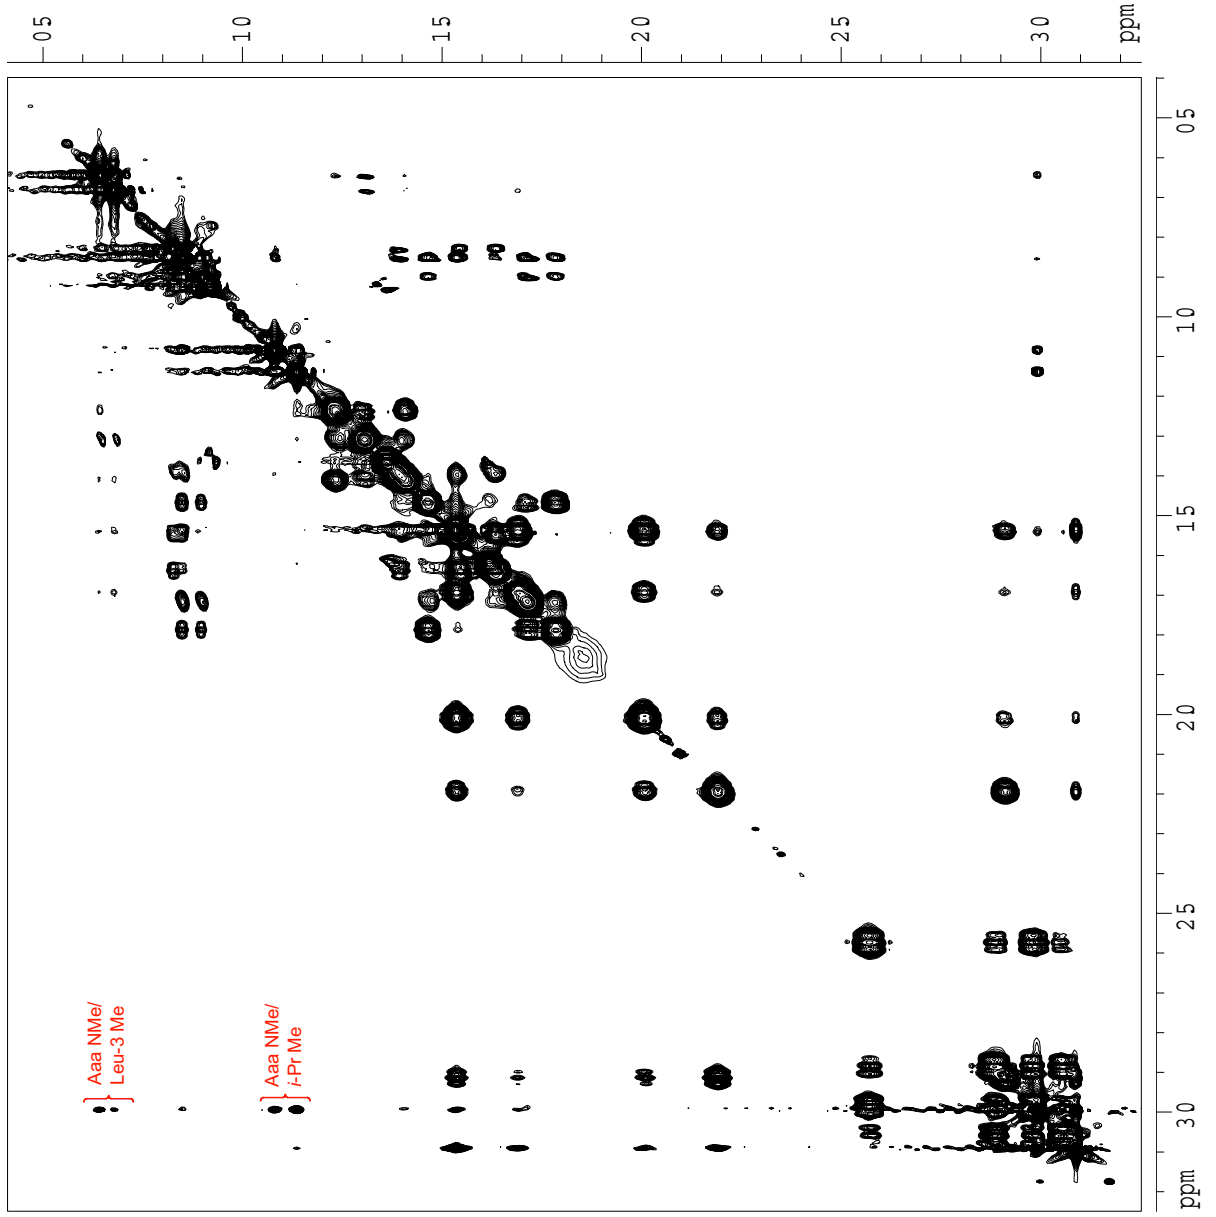

800 MHz NOESY Spectrum of **1d** in CDCl<sub>3</sub>  
400 ms mixing time  
268 K (-5 °C), 20 mM

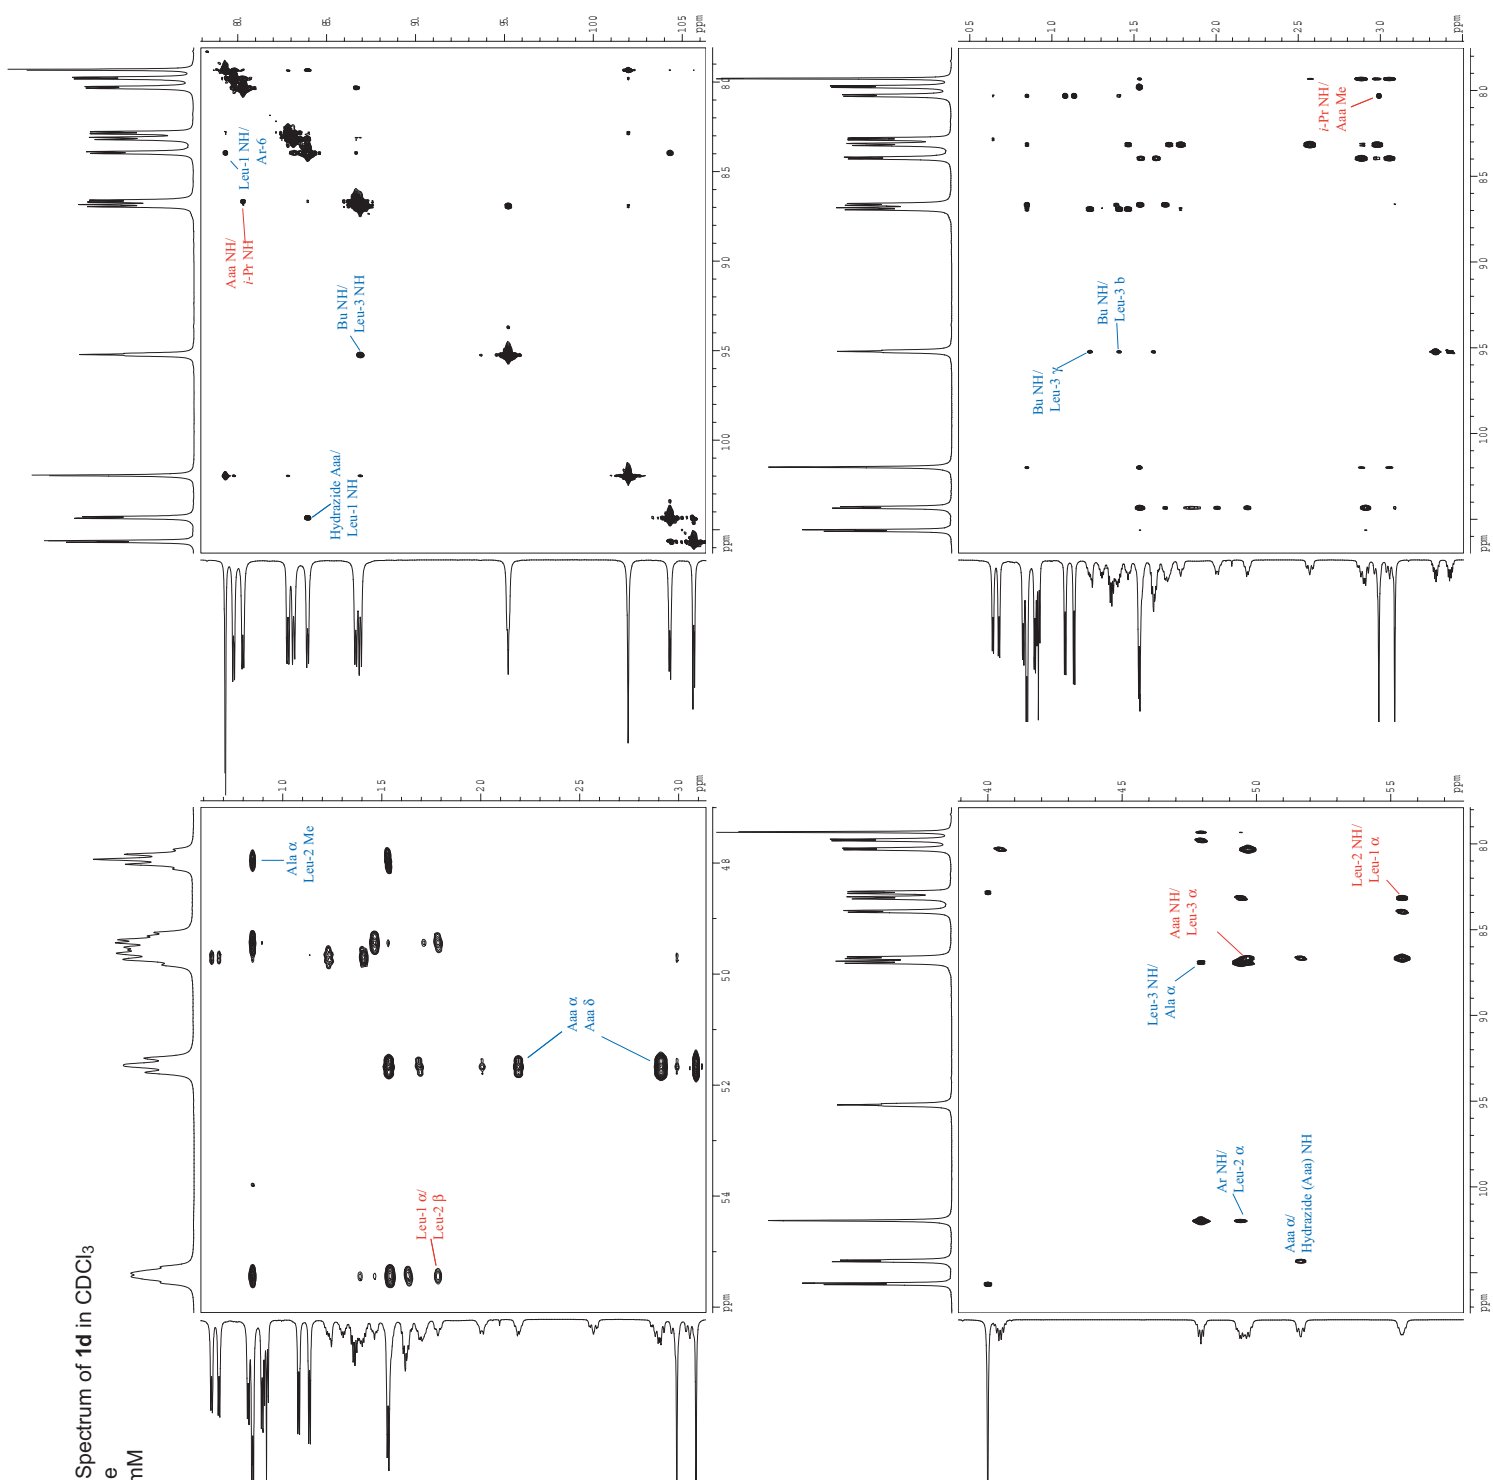

Spectroscopic DATA for the compound **1e**  
(1 mM, CDCl<sub>3</sub> 268K)

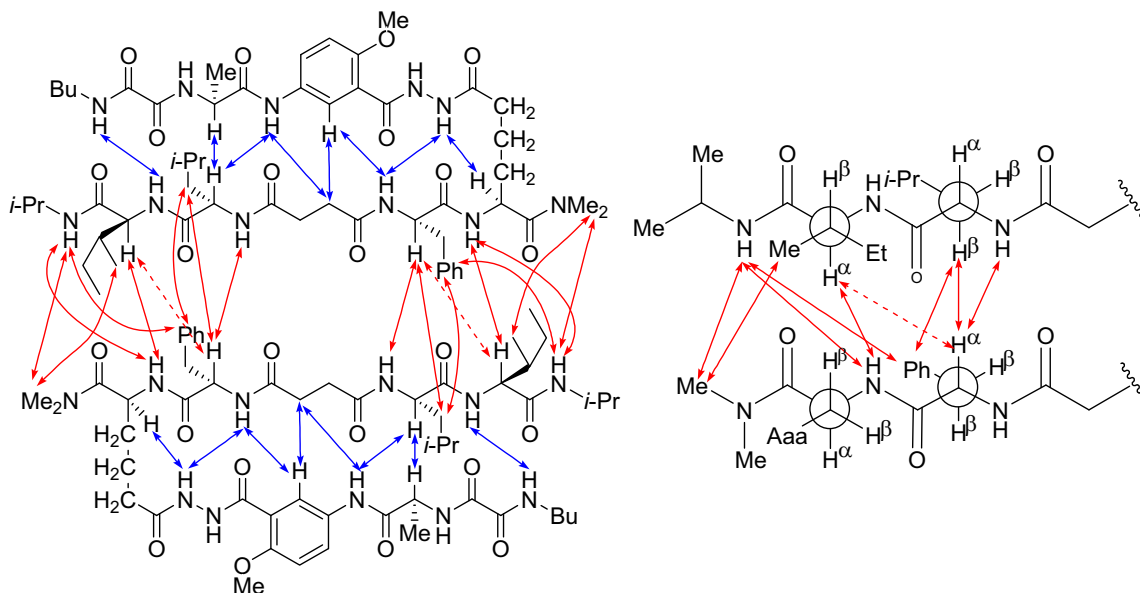

Key NOEs assigned as *intermolecular* are represented with red arrows

Key NOEs assigned as *intramolecular* are represented with blue arrows

Dashed arrow represents an NOE that may arise from deviation from ideal  $\beta$ -sheet geometry or from an alternative conformer or oligomer.

Key data for amino acids.

| Amino acid           | H <sub>α</sub> Shift ppm | NH Shift ppm | <sup>3</sup> J <sub>NHα</sub> Hz |
|----------------------|--------------------------|--------------|----------------------------------|
| Aaa                  | 4.83                     | 8.01         | 8.0                              |
| R <sub>1</sub> = Phe | 5.94                     | 8.66         | 7.7                              |
| R <sub>2</sub> = Leu | 5.06                     | 8.23         | 9.7                              |
| R <sub>3</sub> = Ile | 4.72                     | 8.78         | 9.7                              |
| R <sub>4</sub> = Ala | 4.81                     | 7.93         | overlap                          |

Aminoacidic acid (Aaa)  $\delta$  proton resonances.

*pro-R*: 2.80 ppm, t, (*overlap*)

*pro-S*: 2.14 ppm, td, ( $J_1 = 11.9$  Hz;  $J_2 = 7.0$  Hz)

anisotropy = 0.66ppm

Key data for other NH protons.

| Proton          | NH Shift ppm | $J$ Hz |
|-----------------|--------------|--------|
| Ar-NH           | 10.20        | -      |
| Hydrazide Ar    | 10.69        | 7.4    |
| Hydrazide Aaa   | 10.63        | 7.4    |
| Bu-NH           | 9.65         | broad  |
| <i>i</i> -Pr-NH | 8.06         | 7.7    |

ESI MS  $m/z$  for C<sub>53</sub>H<sub>82</sub>N<sub>11</sub>O<sub>12</sub> [M+H]<sup>+</sup> calcd 1064.61, found 1064.48.



800 MHz <sup>1</sup>H NMR Spectrum of **1e** in CDCl<sub>3</sub>  
268 K (-5 °C), 1 mM

Current Data Parameters  
 USER slevin  
 NAME SL-7-137-800-H  
 EXPNO 2  
 PROCNO 1  
 F2 - Acquisition Parameters  
 Date\_ 20061109  
 Time 0.00  
 INSTRUM varian  
 PROBHD 40:5mmhruoban  
 PULPROG zgpg30  
 TD 65506  
 SFO 800.132416  
 SOLVENT cdcl3  
 NS 128  
 DS 4  
 SWH 11001.101 Hz  
 FIDRES 0.199998 Hz  
 AQ 2.5000727 sec  
 RG 8192  
 DW 45.450 usec  
 DE 4.50 usec  
 TE 268.5 K  
 F2 - Processing parameter  
 SI 32768  
 SF 799.8064116 MHz  
 ACQ 0.00  
 LB 1.0 Hz  
 GB 0  
 PC 2.00  
 1D NMR plot parameters  
 CX 22.80 cm  
 CY 5.00 cm  
 F1P 1.990 ppm  
 F1 1591.24 Hz  
 F2P 0.392 ppm  
 F2 313.47 Hz  
 PPMCM 0.07007 ppm/cm  
 HZCM 56.04266 Hz/cm

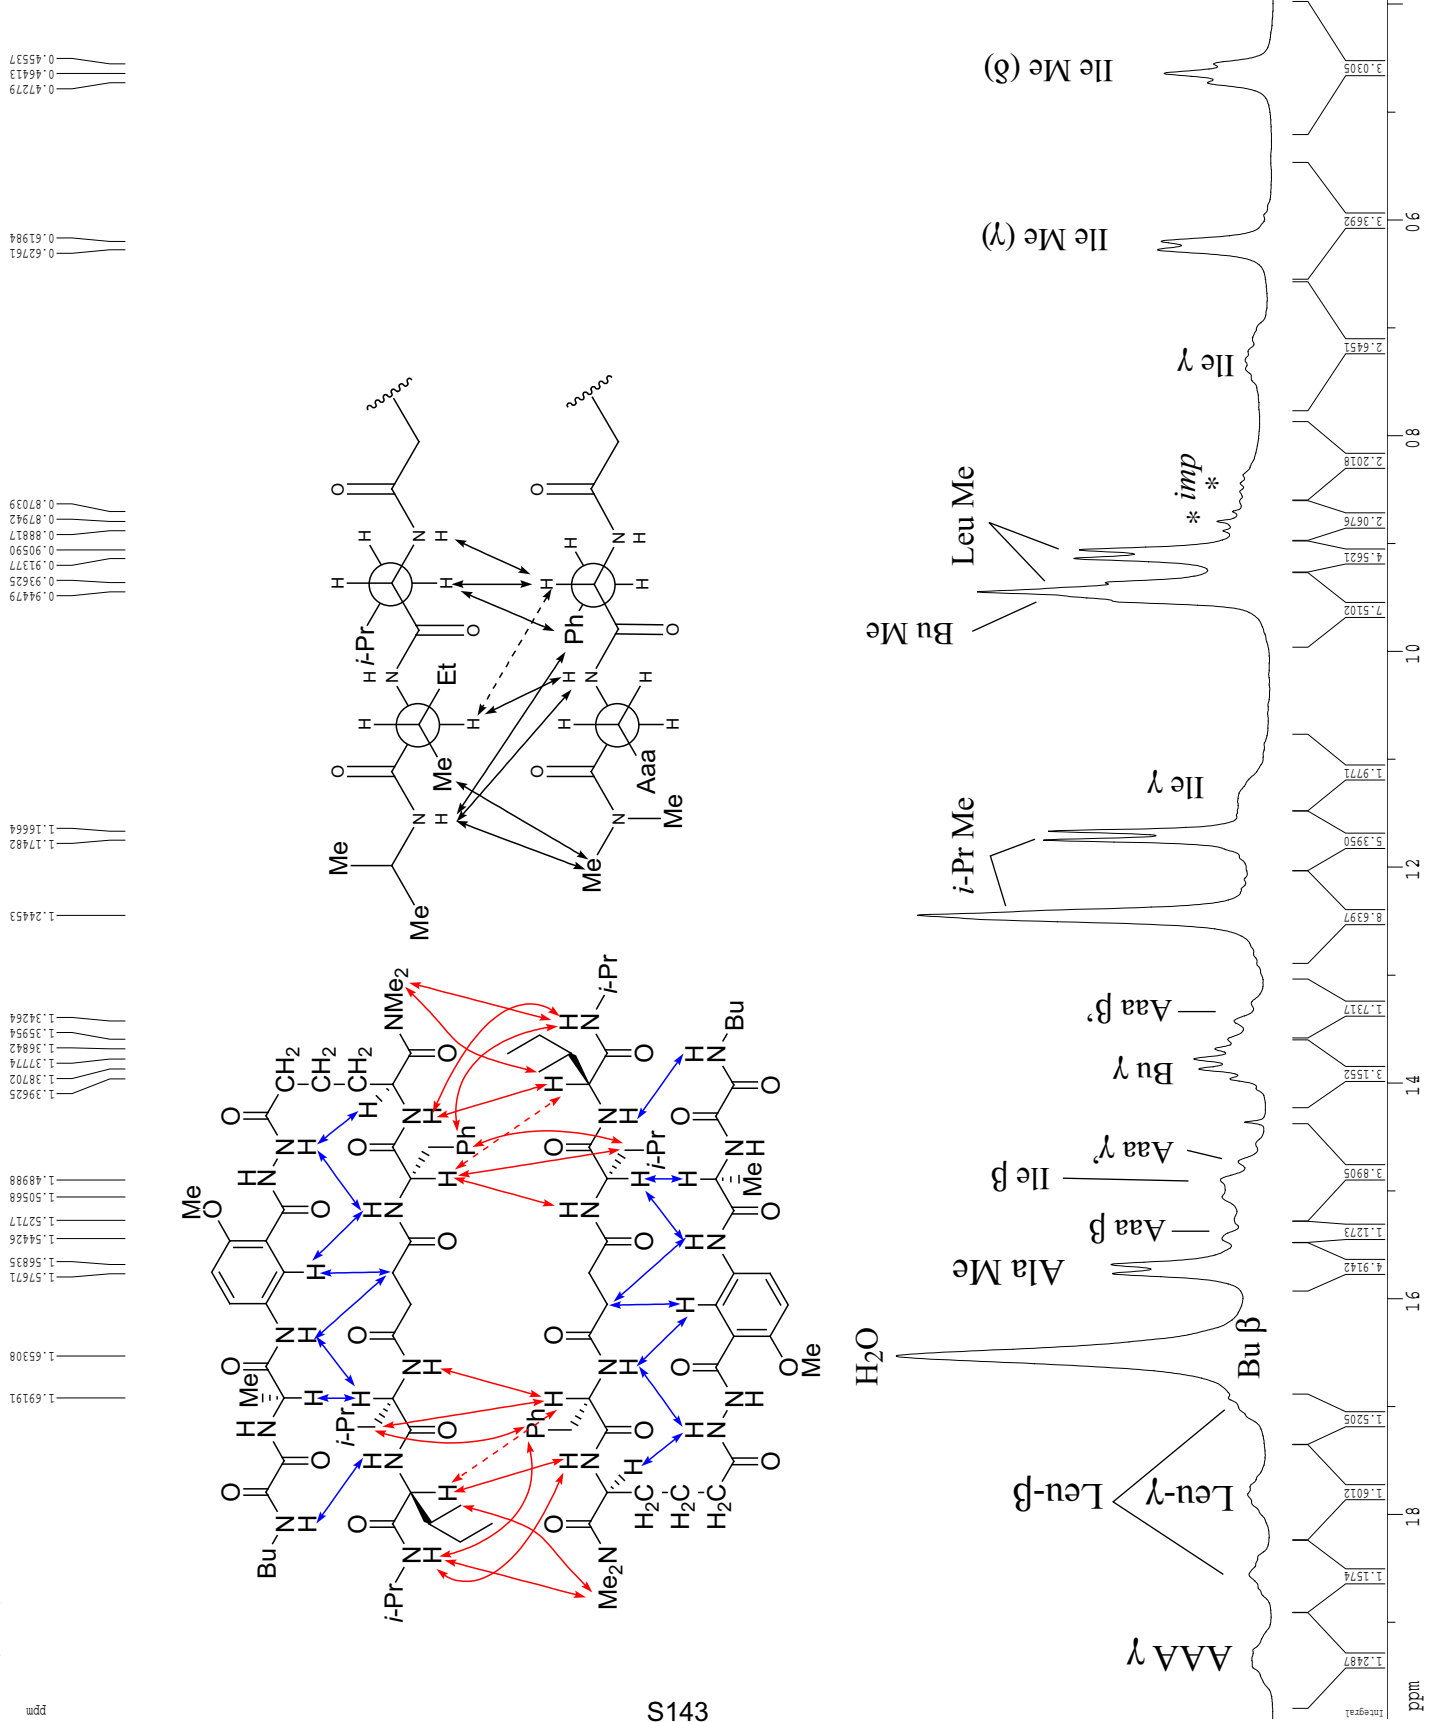





Current Data Parameters  
 USER slevin  
 NAME SL-7-137-800-H  
 EXPNO 3  
 PROCNO 1

## F2 - Acquisition Parameters

Date\_ 20061108  
 Time\_ 0.00  
 INSTRUM varian  
 PROBHD 40:5mmbroadban  
 PULPROG gcosy  
 TD 4096  
 SOLVENT cdc13  
 NS 16  
 DS 64  
 SWH 11001.101 Hz  
 FIDRES 2.685816 Hz  
 AQ 0.1843700 sec  
 RG 4096  
 DW 45.450 usec  
 DE 231.43 usec  
 TE 268.5 K

## F1 - Acquisition parameters

ND0 1  
 TD 512  
 SF01 799.8107 MHz  
 FIDRES 21.486525 Hz  
 SW 13.755 ppm  
 F1MODE undefined

## F2 - Processing parameters

SI 4096  
 SF 799.8064116 MHz  
 WDW SINE  
 SSB 0  
 LB 0.00 Hz  
 GB 0  
 PC 1.40

## F1 - Processing parameters

SI 512  
 MC2 QF  
 SF 799.8064116 MHz  
 WDW SINE  
 SSB 0  
 LB 0.00 Hz  
 GB 0

## 2D NMR plot parameters

CX2 15.00 cm  
 CX1 15.00 cm  
 F2PLO 5.500 ppm  
 F2LO 4398.94 Hz  
 F2PHI -0.100 ppm  
 F2HI -79.98 Hz  
 F1PLO 5.500 ppm  
 F1LO 4398.94 Hz  
 F1PHI -0.100 ppm  
 F1HI -79.98 Hz  
 F2PPMCM 0.37333 ppm/cm  
 F2HZCM 298.59439 Hz/cm  
 F1PPMCM 0.37333 ppm/cm  
 F1HZCM 298.59439 Hz/cm

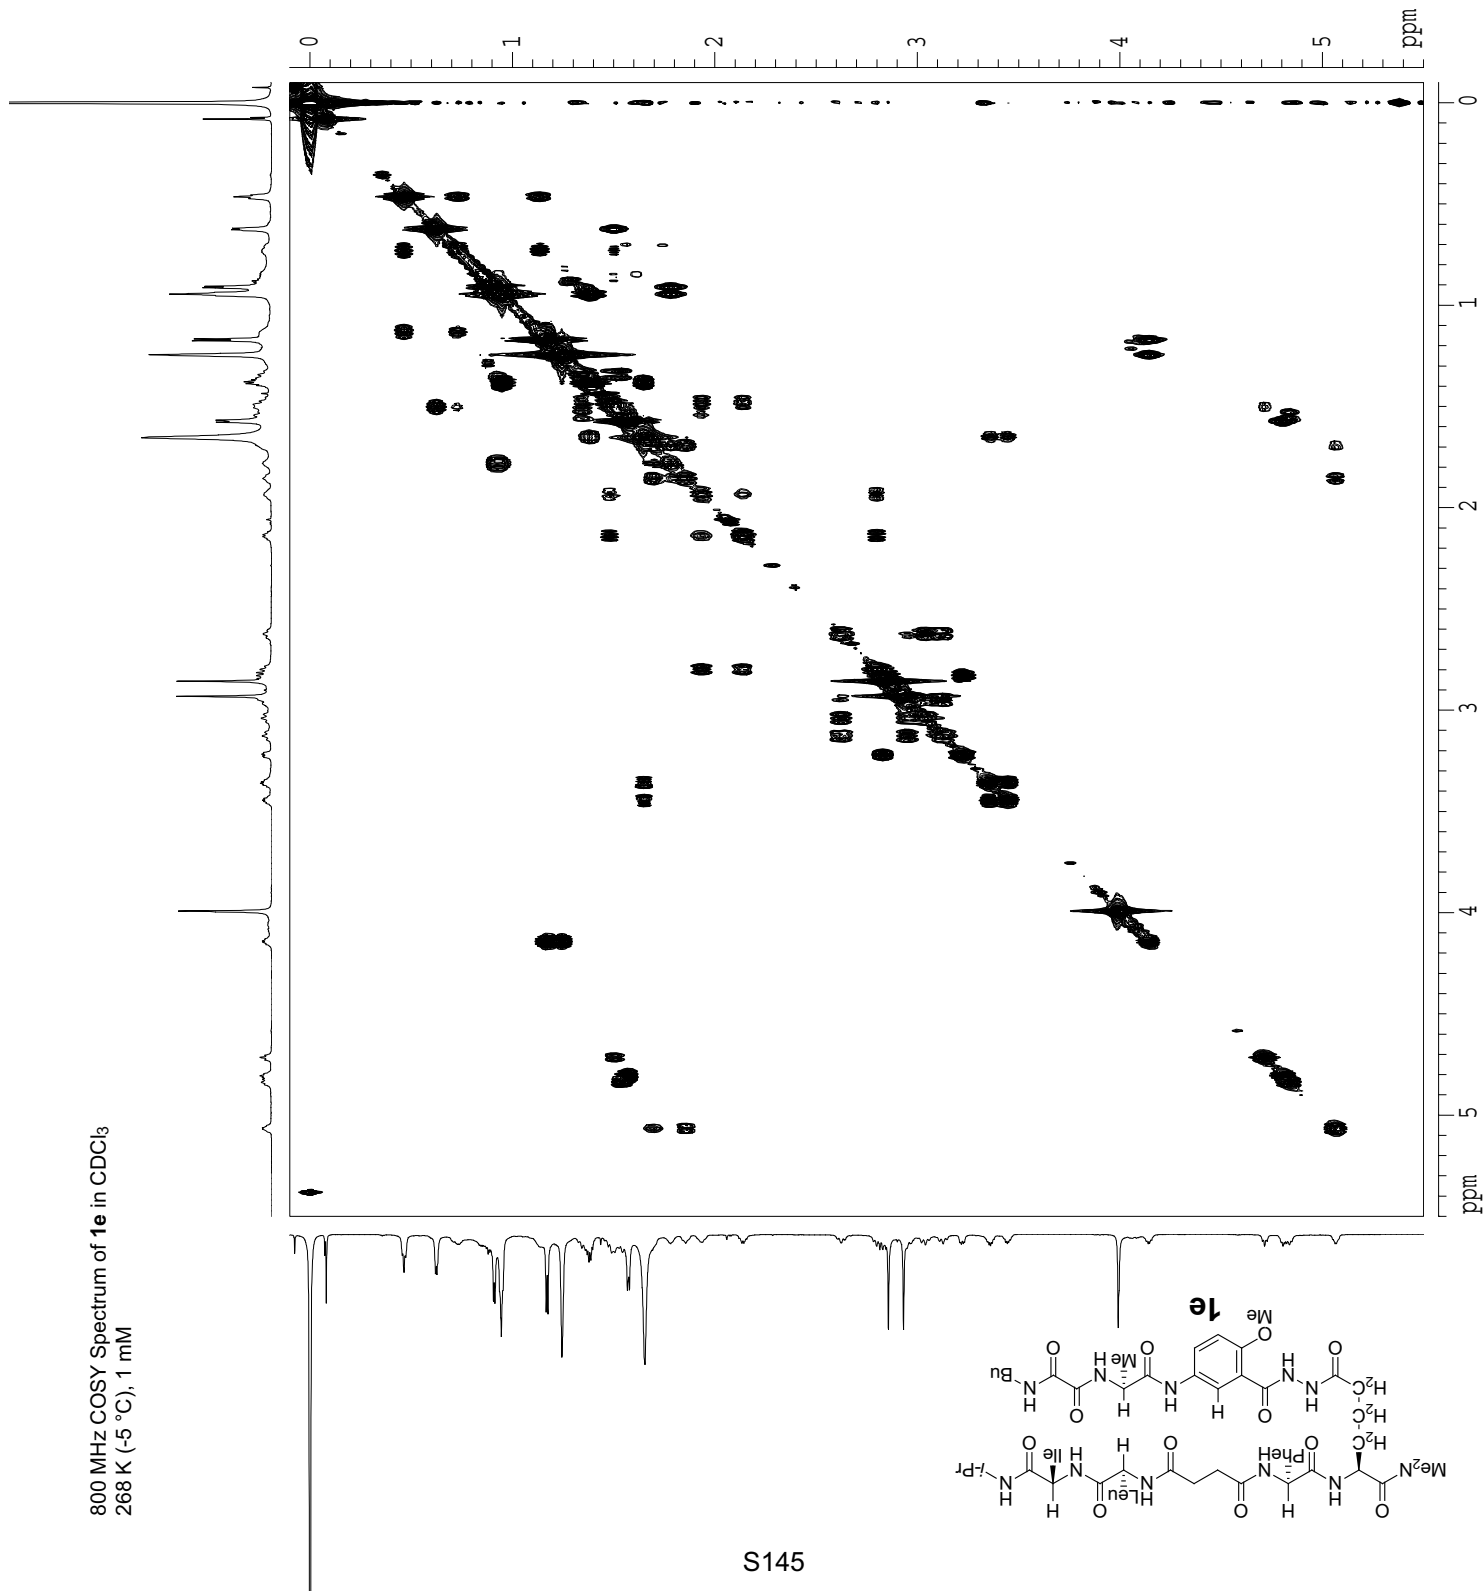

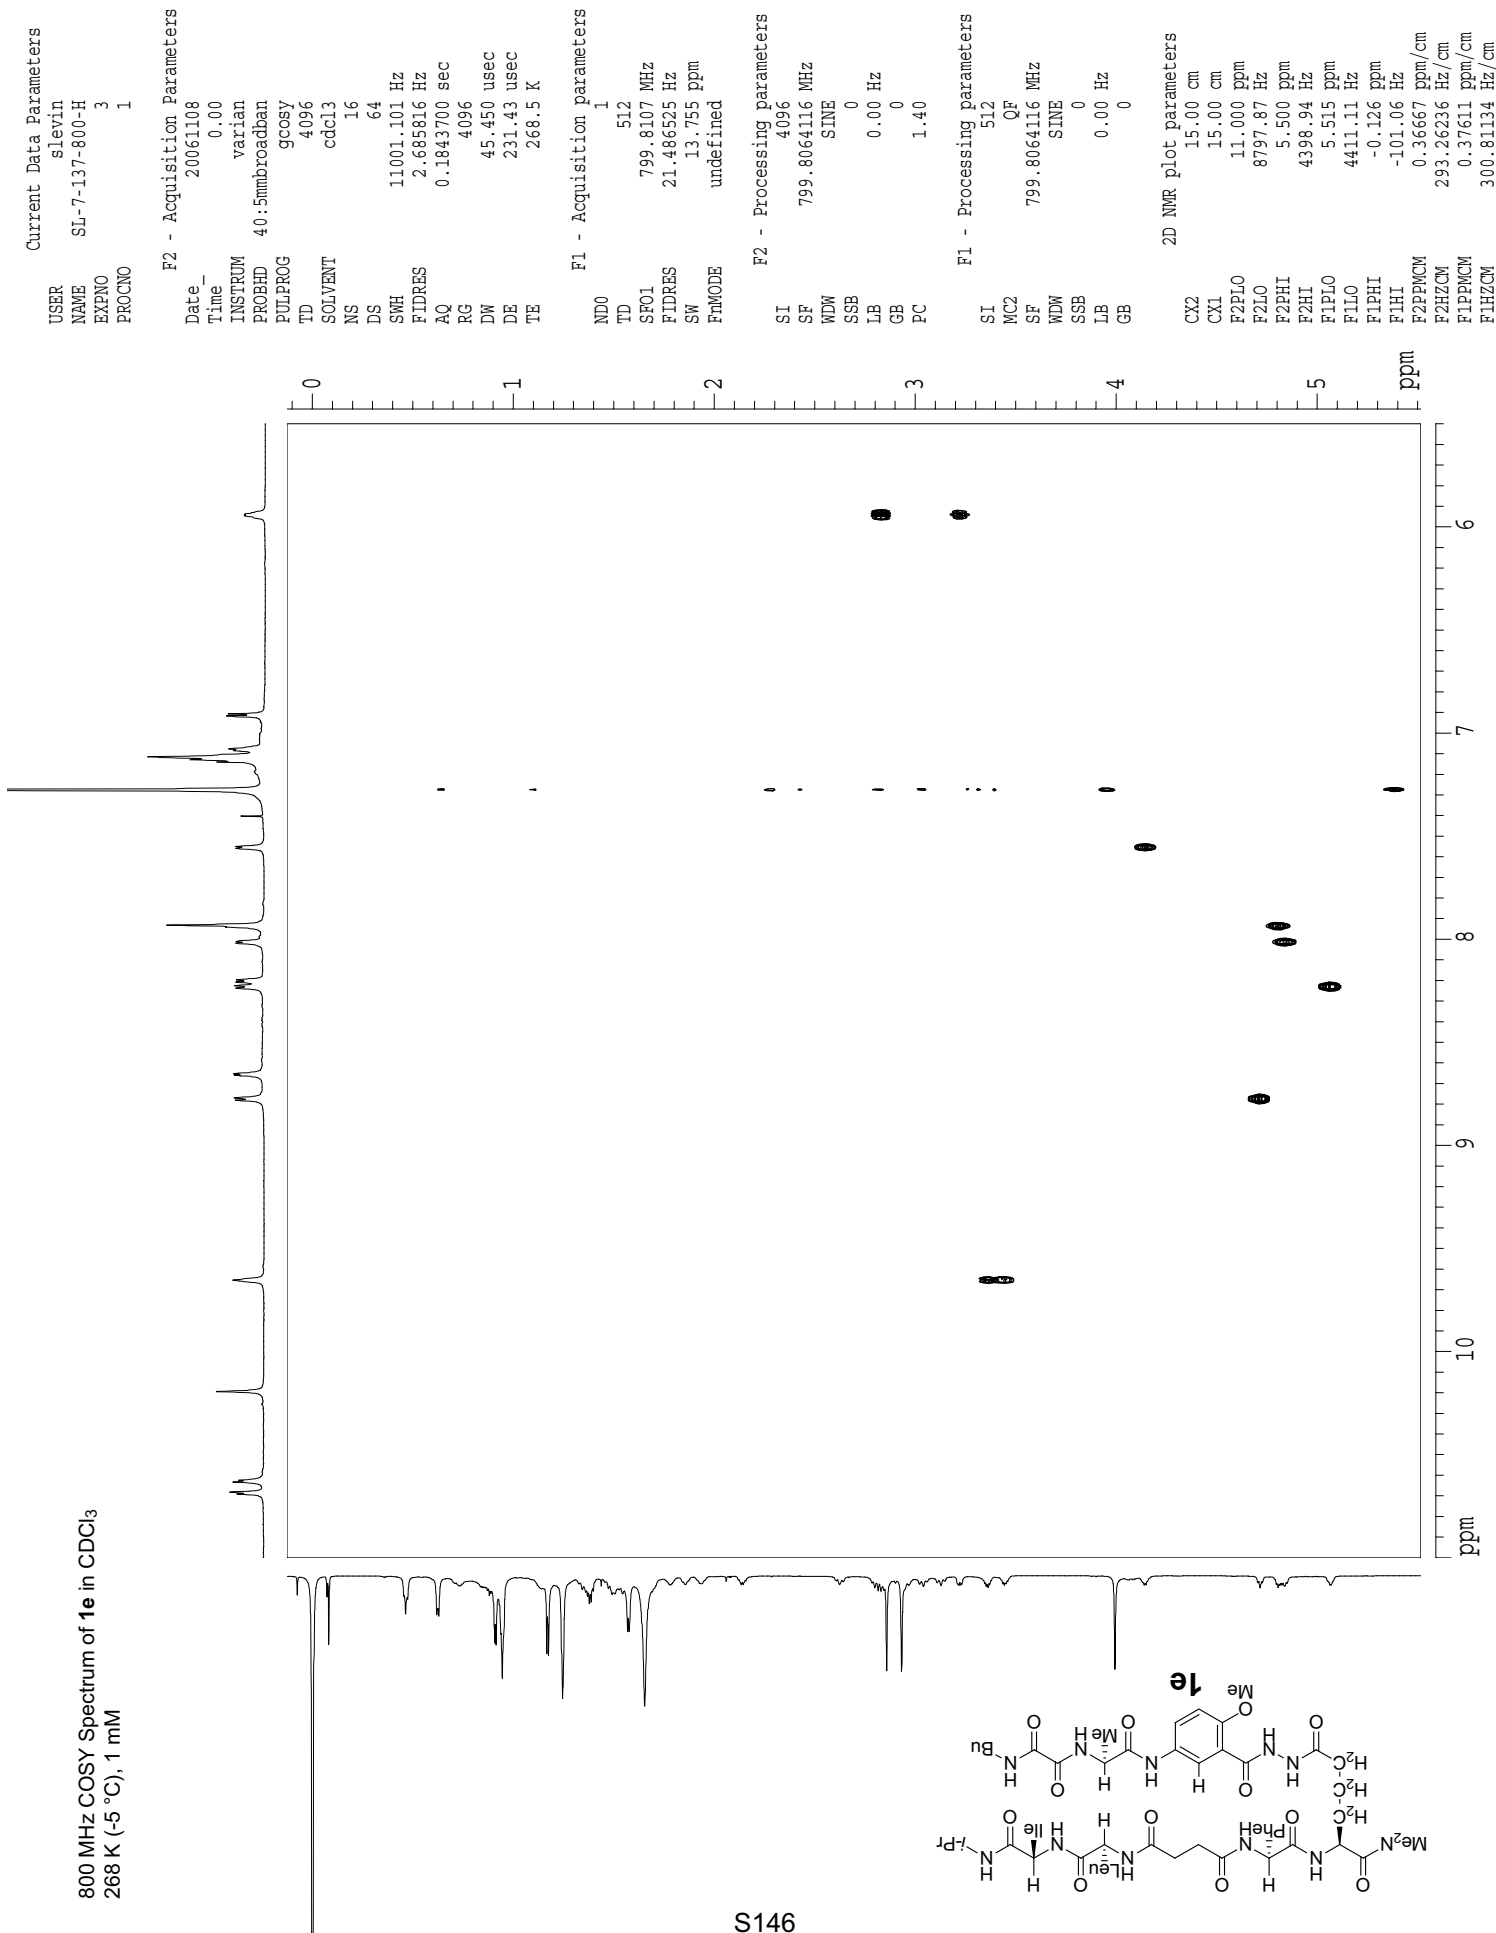

Current Data Parameters  
 USER slevin  
 NAME SL-7-137-800-H  
 EXPNO 3  
 PROCNO 1

## F2 - Acquisition Parameters

Date\_ 20061108  
 Time\_ 0.00  
 INSTRUM varian  
 PROBHD 40:5mmrbroadban  
 PULPROG gcosy  
 TD 4096  
 SOLVENT cdcl3  
 NS 16  
 DS 64  
 SWH 11001.101 Hz  
 FIDRES 2.685816 Hz  
 AQ 0.1843700 sec  
 RG 4096  
 DW 45.450 usec  
 DE 231.43 usec  
 TE 268.5 K

## F1 - Acquisition Parameters

ND0 1  
 TD 512  
 SF01 799.8107 MHz  
 FIDRES 21.486525 Hz  
 SW 13.755 ppm  
 FMODE undefined

## F2 - Processing parameters

SI 4096  
 SF 799.8064116 MHz  
 WDW SINE  
 SSB 0  
 LB 0.00 Hz  
 GB 0  
 PC 1.40

## F1 - Processing parameters

SI 512  
 MC2 OF  
 SF 799.8064116 MHz  
 WDW SINE  
 SSB 0  
 LB 0.00 Hz  
 GB 0

## 2D NMR plot parameters

CX2 15.00 cm  
 CX1 15.00 cm  
 F2PLO 11.002 ppm  
 F2LO 8799.73 Hz  
 F2PHI 5.498 ppm  
 F2HI 4397.68 Hz  
 F1PLO 11.000 ppm  
 F1LO 8797.87 Hz  
 F1PHI 5.500 ppm  
 F1HI 4398.94 Hz  
 F2P2MCM 0.36693 ppm/cm  
 F2HZCM 293.47009 Hz/cm  
 F1P2MCM 0.36667 ppm/cm  
 F1HZCM 293.26236 Hz/cm

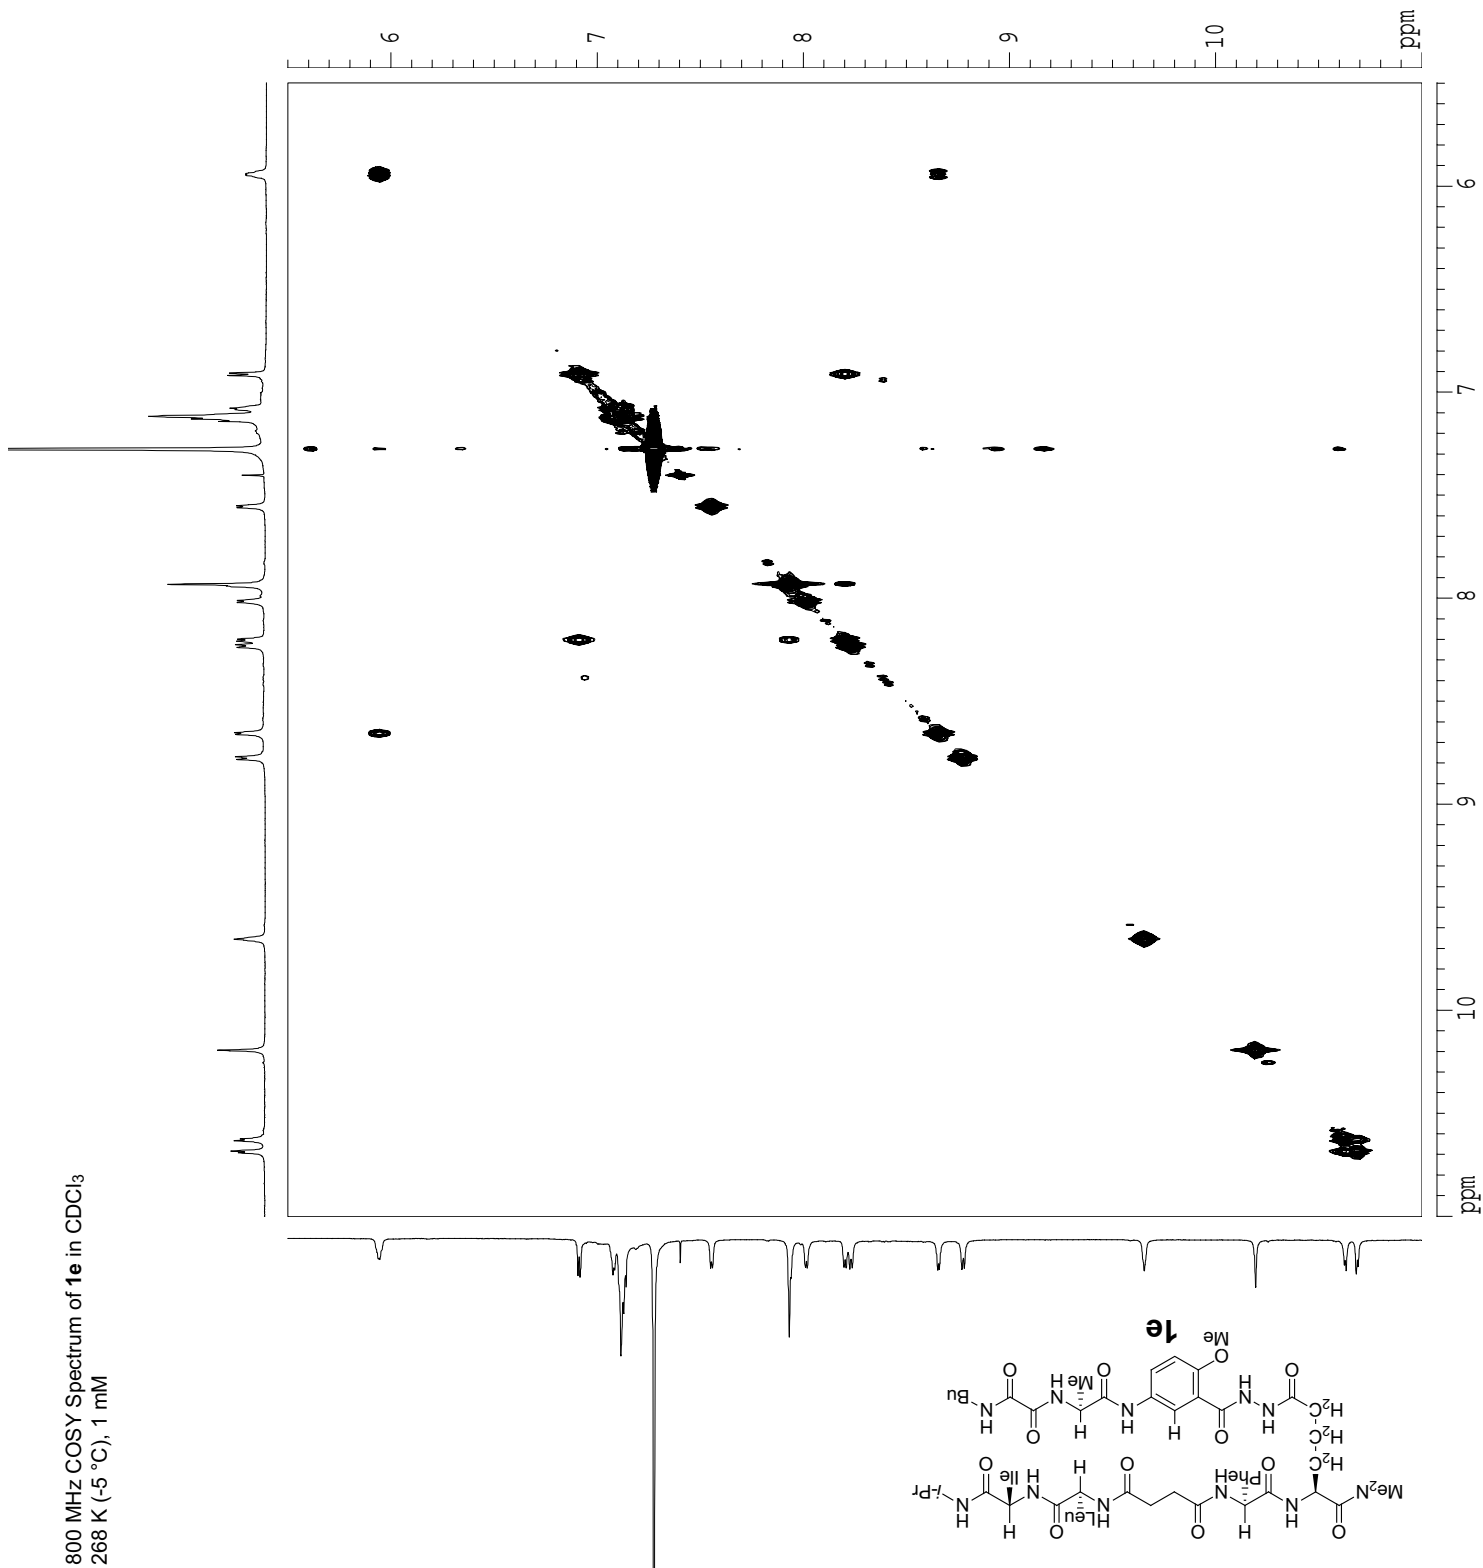



Supporting Information

S. Levin and J. S. Nowick

Current Data Parameters  
 USER slevin  
 NAME SL-7-137-800-H  
 EXPNO 3  
 PROCNO 1

F2 - Acquisition Parameters  
 Date\_ 20061108  
 Time\_ 0.00  
 INSTRUM varian  
 PROBHD 40:5mm broadband  
 PULPROG gcosy  
 TD 4096  
 SOLVENT cdcl3  
 NS 16  
 DS 64  
 SWH 11001.101 Hz  
 FIDRES 2.685816 Hz  
 AQ 0.1843700 sec  
 RG 4096  
 DW 45.450 usec  
 DE 231.43 usec  
 TE 268.5 K

F1 - Acquisition Parameters  
 ND0 1  
 TD 512  
 SFO1 799.8107 MHz  
 FIDRES 21.486525 Hz  
 SW 13.755 ppm  
 FMODE undefined

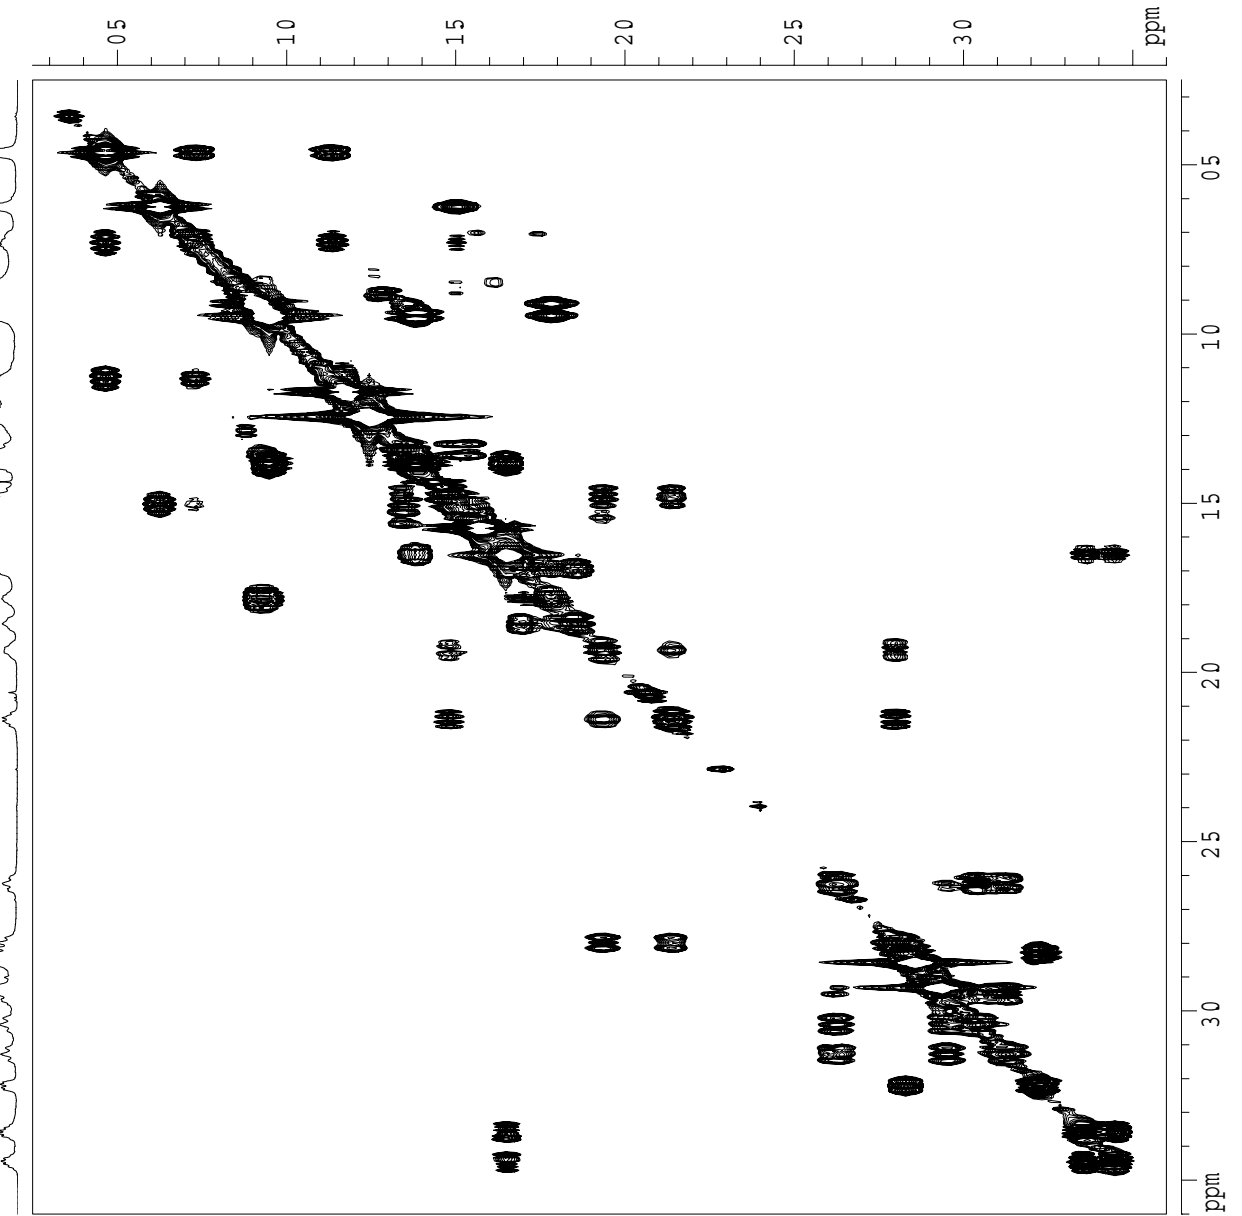

F2 - Processing parameters  
 SI 4096  
 SF 799.8064116 MHz  
 WDW SINE  
 SSB 0  
 LB 0.00 Hz  
 GB 0  
 PC 1.40

F1 - Processing parameters  
 SI 512  
 MC2 QF  
 SF 799.8064116 MHz  
 WDW SINE  
 SSB 0  
 LB 0.00 Hz  
 GB 0

2D NMR plot parameters  
 CX2 15.00 cm  
 CX1 15.00 cm  
 F2PLO 3.600 ppm  
 F2LO 2879.30 Hz  
 F2PHI 0.250 ppm  
 F2HI 199.95 Hz  
 F1PLO 3.600 ppm  
 F1LO 2879.30 Hz  
 F1PHI 0.250 ppm  
 F1HI 199.75 Hz  
 F2PFCM 0.22333 ppm/cm  
 F2HZCM 178.62343 Hz/cm  
 F1PFCM 0.22335 ppm/cm  
 F1HZCM 178.63680 Hz/cm

800 MHz COSY Spectrum of **1e** in CDCl<sub>3</sub>  
 268 K (-5 °C), 1 mM

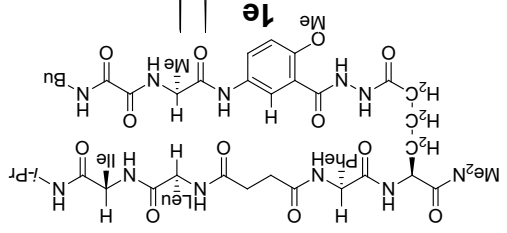

Supporting Information

S. Levin and J. S. Nowick

Current Data Parameters  
 USER slevin  
 NAME SL-7-137-800-H  
 EXPNO 4  
 PROCNO 1

F2 - Acquisition Parameters  
 Date\_ 20061108  
 Time 0.00  
 INSTRUM varian  
 PROBHD 40:5mmbroadban  
 PULPROG wgtocsy\_bn  
 TD 4096  
 SOLVENT CDCl3  
 NS 16  
 DS 64  
 SWH 11001.101 Hz  
 FIDRES 2.685816 Hz  
 AQ 0.1862132 sec  
 RG 287.4  
 DW 45.450 usec  
 DE 6.00 usec  
 TE 268.5 K

F1 - Acquisition parameters  
 ND0 1  
 TD 512  
 SFO1 799.8107 MHz  
 FIDRES 21.486525 Hz  
 SW 13.755 ppm  
 FwMODE undefined

F2 - Processing parameters  
 SI 2048  
 SF 799.8064116 MHz  
 WDW QSIINE  
 SSB 2  
 LB 0.00 Hz  
 GB 0  
 PC 1.40

F1 - Processing parameters  
 SI 2048  
 MC2 States  
 SF 799.8064116 MHz  
 WDW QSIINE  
 SSB 2  
 LB 0.00 Hz  
 GB 0

2D NMR plot parameters  
 CX2 15.00 cm  
 CX1 15.00 cm  
 F2PLO 11.002 ppm  
 F2LLO 8799.73 Hz  
 F2PHI -0.106 ppm  
 F2HI -84.95 Hz  
 F1PLO 11.002 ppm  
 F1LLO 8799.73 Hz  
 F1PHI -0.106 ppm  
 F1HI -84.95 Hz  
 F2PPMCM 0.74057 ppm/cm  
 F2HZCM 592.31183 Hz/cm  
 F1PPMCM 0.74057 ppm/cm  
 F1HZCM 592.31183 Hz/cm

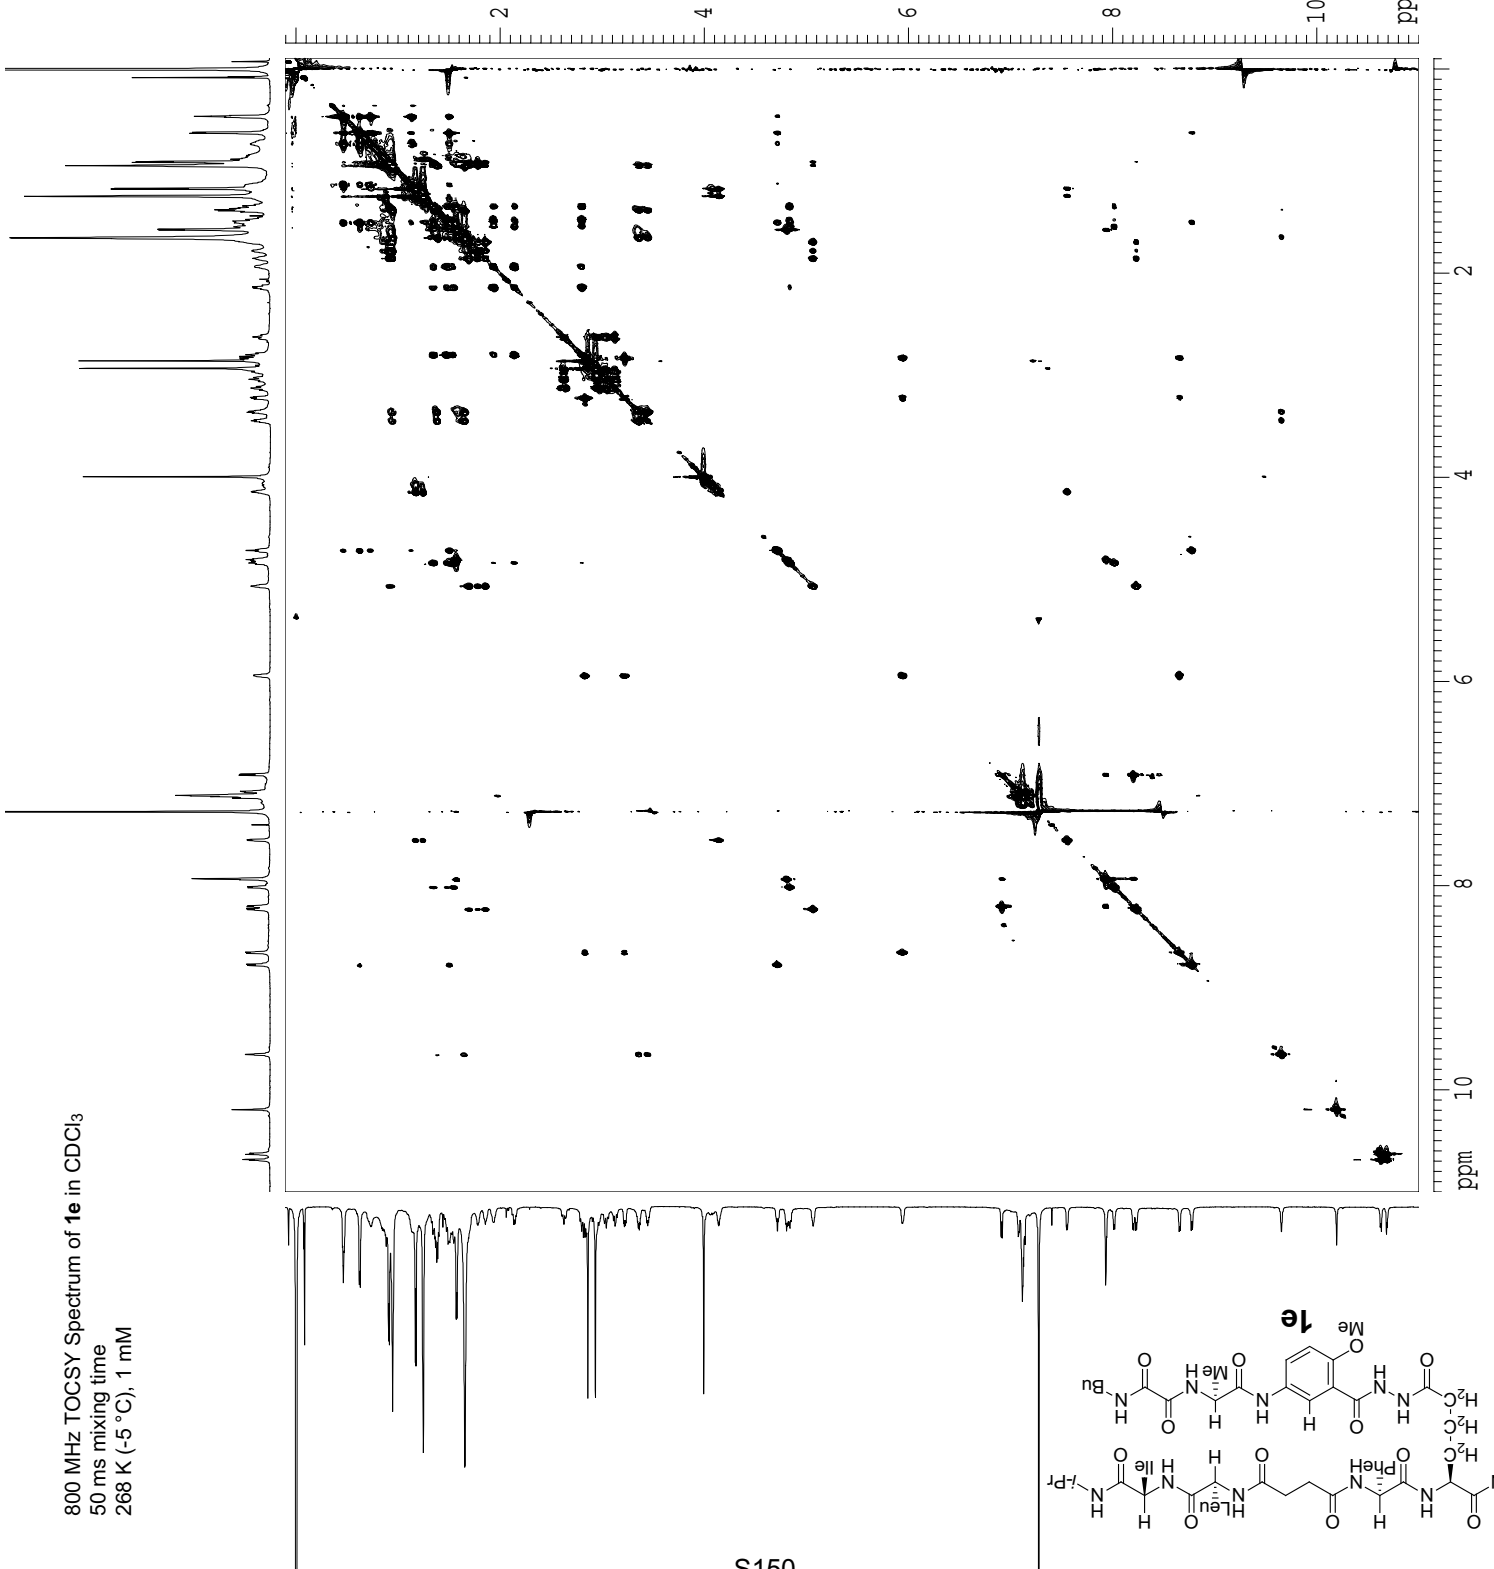

## Current Data Parameters

USER slevin  
 NAME SL-7-137-800-H  
 EXPNO 4  
 PROCNO 1

## F2 - Acquisition Parameters

Date\_ 20061108  
 Time\_ 0.00  
 INSTRUM varian  
 PROBHD 40:5mmbroadban  
 PULPROG wgtocpsy\_bn  
 TD 4096  
 SOLVENT CDC13  
 NS 16  
 DS 64  
 SWH 11001.101 Hz  
 FIDRES 2.685816 Hz  
 AQ 0.1862132 sec  
 RG 287.4  
 DW 45.450 usec  
 DE 6.00 usec  
 TE 268.5 K

## F1 - Acquisition parameters

ND0 1  
 TD 512  
 SF01 799.8107 MHz  
 FIDRES 21.486525 Hz  
 SW 13.755 ppm  
 FnmODE undefined

## F2 - Processing parameters

SI 2048  
 SF 799.8064116 MHz  
 WDW QSSINE  
 SSB 2  
 LB 0.00 Hz  
 GB 0  
 PC 1.40

## F1 - Processing parameters

SI 2048  
 MC2 States  
 SF 799.8064116 MHz  
 WDW QSSINE  
 SSB 2  
 LB 0.00 Hz  
 GB 0

## 2D NMR plot parameters

CX2 15.00 cm  
 CX1 15.00 cm  
 F2FLO 5.500 ppm  
 F2LO 4398.94 Hz  
 F2PHI -0.100 ppm  
 F2HI -79.98 Hz  
 F1FLO 5.500 ppm  
 F1LO 4398.94 Hz  
 F1PHI -0.100 ppm  
 F1HI -79.98 Hz  
 F2PPMCM 0.37333 ppm/cm  
 F2HZCM 298.59439 Hz/cm  
 F1PPMCM 0.37333 ppm/cm  
 F1HZCM 298.59439 Hz/cm

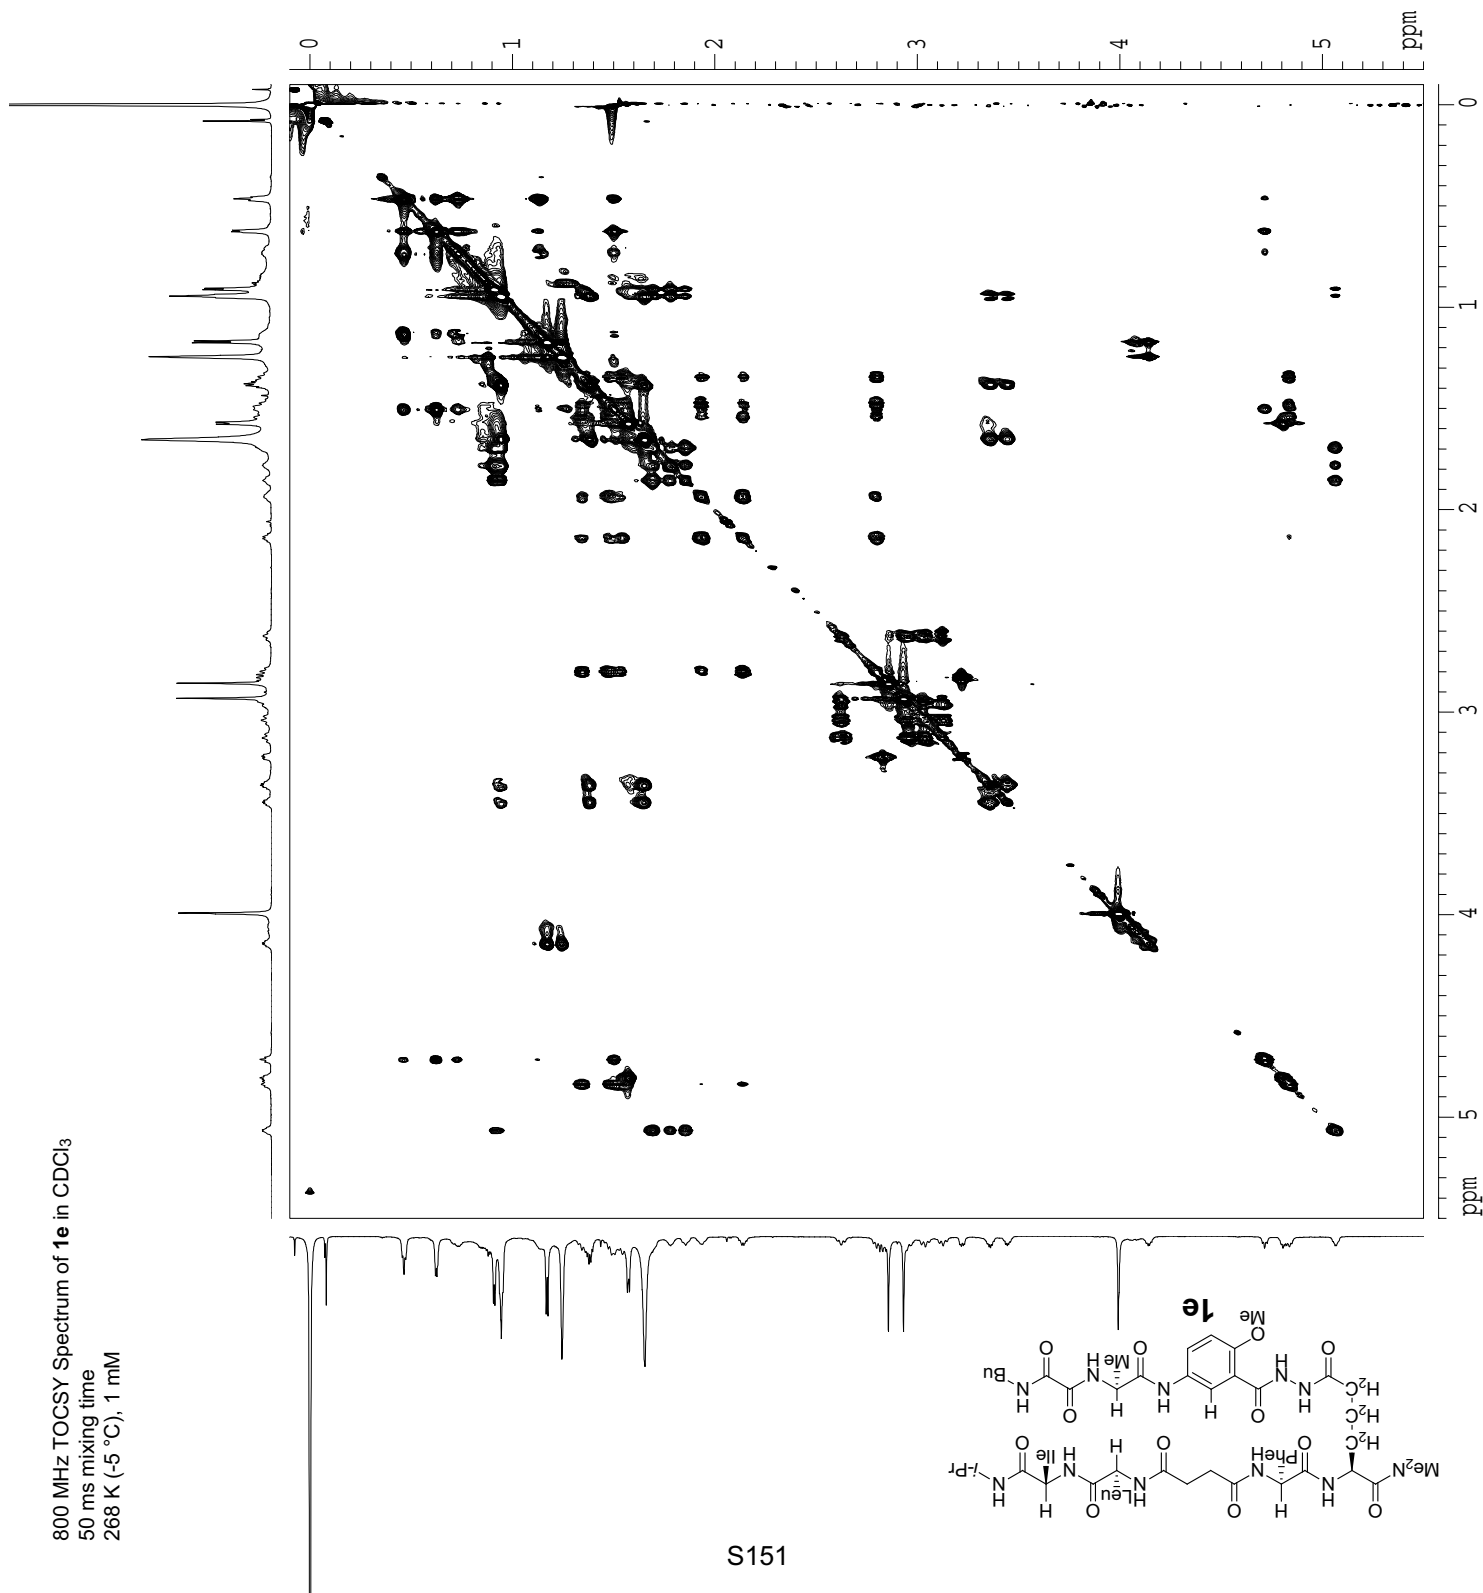

Current Data Parameters  
 USER slevin  
 NAME SL-7-137-800-H  
 EXPNO 4  
 PROCNO 1

## F2 - Acquisition Parameters

Date\_ 20061108  
 Time 0.00  
 INSTRUM varian  
 PROBHD 40-5mm broadband  
 PULPROG wgtocsy\_bn  
 TD 4096  
 SOLVENT CDCl<sub>3</sub>  
 NS 16  
 DS 64  
 SWH 11001.101 Hz  
 FIDRES 2.685816 Hz  
 AQ 0.1862132 sec  
 RG 287.4  
 DW 45.450 usec  
 DE 6.00 usec  
 TE 268.5 K

## F1 - Acquisition parameters

ND0 1  
 TD 512  
 SF01 799.8107 MHz  
 FIDRES 21.486525 Hz  
 SW 13.755 ppm  
 FwMODE undefined

## F2 - Processing parameters

SI 2048  
 SF 799.8064116 MHz  
 WDW QSI  
 SSB 2  
 LB 0.00 Hz  
 GB 0  
 PC 1.40

## F1 - Processing parameters

SI 2048  
 MC2 States  
 SF 799.8064116 MHz  
 WDW QSI  
 SSB 2  
 LB 0.00 Hz  
 GB 0

## 2D NMR plot parameters

CX2 15.00 cm  
 CX1 15.00 cm  
 F2PLO 11.000 ppm  
 F2LO 8797.87 Hz  
 F2PHI 5.500 ppm  
 F2HI 4398.94 Hz  
 F1PLO 5.502 ppm  
 F1LO 4400.37 Hz  
 F1PHI -0.106 ppm  
 F1HI -84.95 Hz  
 F2PPMCM 0.36667 ppm/cm  
 F2HZCM 293.26236 Hz/cm  
 F1PPMCM 0.37387 ppm/cm  
 F1HZCM 299.02078 Hz/cm

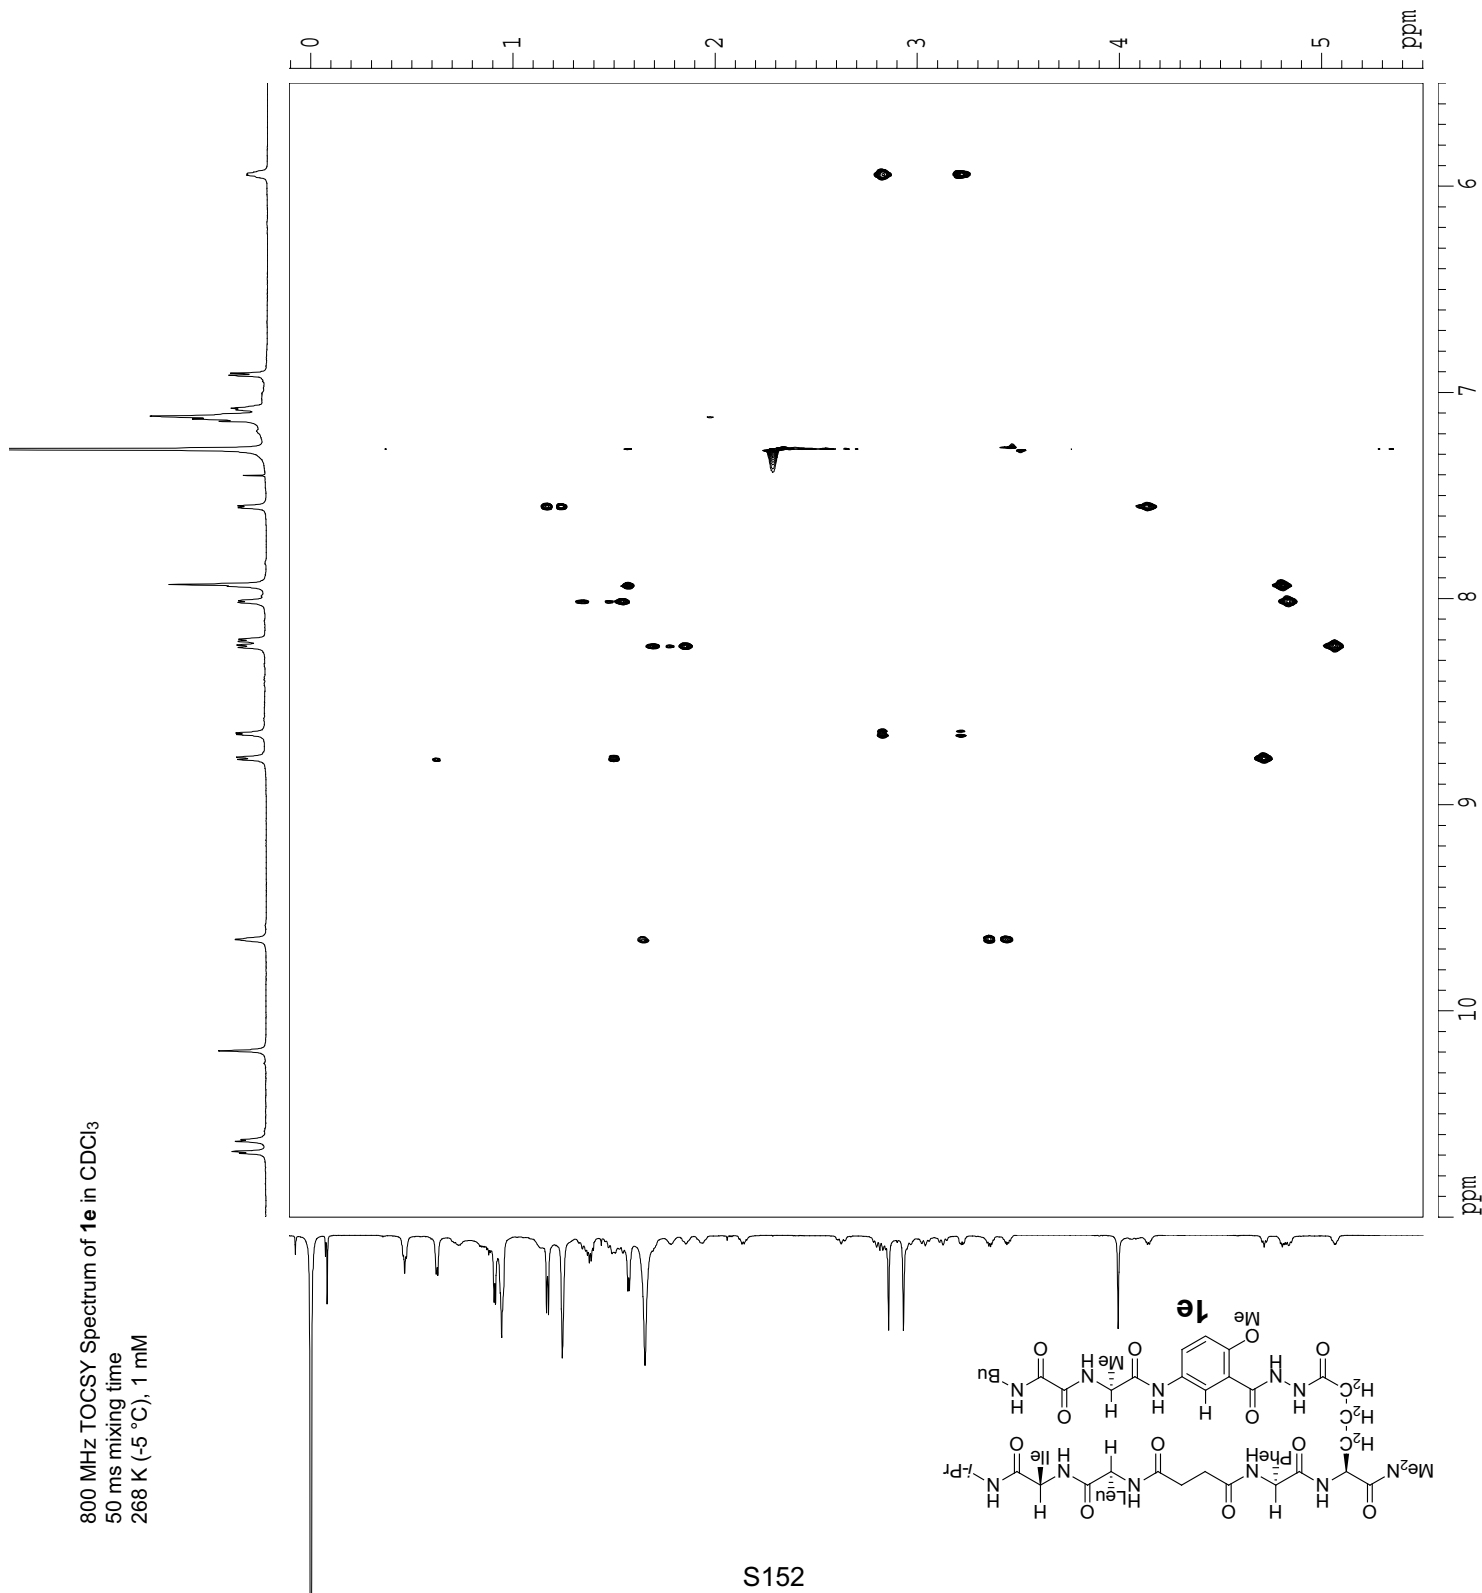



800 MHz TOCSY Spectrum of **1e** in CDCl<sub>3</sub>  
 50 ms mixing time  
 268 K (-5 °C), 1 mM

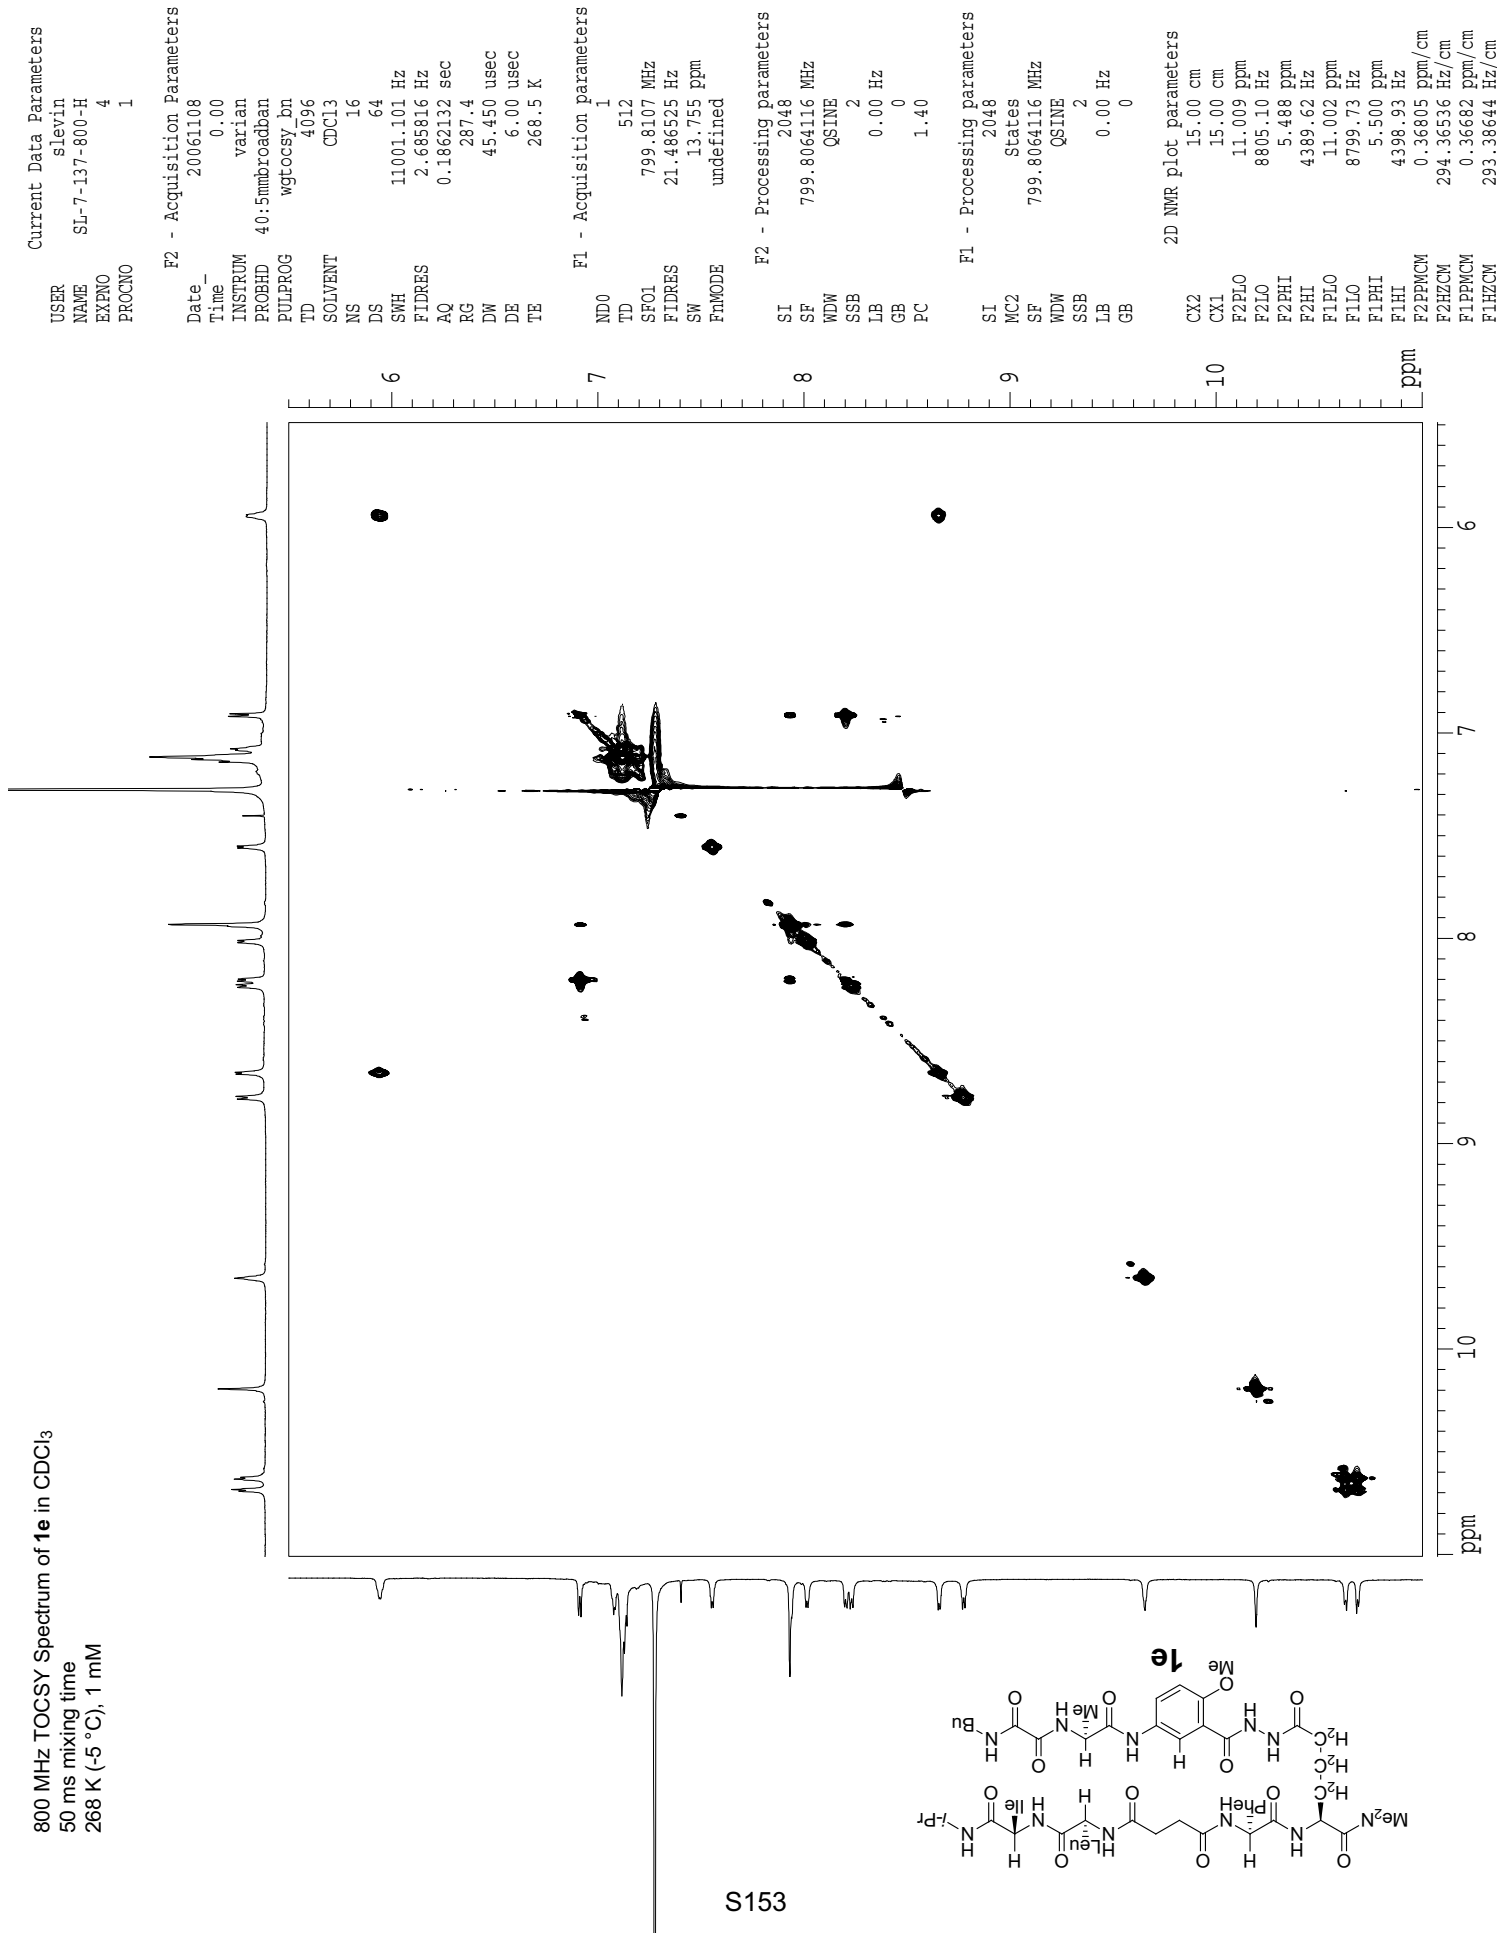

Current Data Parameters  
 USER slevin  
 NAME SL-7-137-800-H  
 EXPNO 4  
 PROCNO 1

F2 - Acquisition Parameters  
 Date\_ 20061108  
 Time 0.00  
 INSTRUM varian  
 PROBHD 40:5mmbroadban  
 PULPROG wgtocsy bt  
 TD 4096  
 SOLVENT CDCl3  
 NS 16  
 DS 64  
 SWH 11001.101 Hz  
 FIDRES 2.685816 Hz  
 AQ 0.1862132 sec  
 RG 287.4  
 DW 45.450 usec  
 DE 6.00 usec  
 TE 268.5 K

F1 - Acquisition parameters  
 ND0 1  
 TD 512  
 SF01 799.8107 MHz  
 FIDRES 21.486525 Hz  
 SW 13.755 ppm  
 F1MODE undefined

F2 - Processing parameters  
 SI 2048  
 SF 799.8064116 MHz  
 WDW QSINE  
 SSB 2  
 LB 0.00 Hz  
 GB 0  
 PC 1.40

F1 - Processing parameters  
 SI 2048  
 MC2 States  
 SF 799.8064116 MHz  
 WDW QSINE  
 SSB 2  
 LB 0.00 Hz  
 GB 0

2D NMR plot parameters  
 CX2 15.00 cm  
 CX1 15.00 cm  
 F2PLO 11.009 ppm  
 F2LO 8805.10 Hz  
 F2PHI 5.488 ppm  
 F2HI 4389.62 Hz  
 F1PLO 11.002 ppm  
 F1LO 8799.73 Hz  
 F1PHI 5.500 ppm  
 F1HI 4398.93 Hz  
 F2PPMCM 0.36805 ppm/cm  
 F2HZCM 294.36536 Hz/cm  
 F1PPMCM 0.36682 ppm/cm  
 F1HZCM 293.38644 Hz/cm

Supporting Information

S. Levin and J. S. Nowick

Current Data Parameters  
 USER slevin  
 NAME SL-7-137-800-H  
 EXPNO 4  
 PROCNO 1

F2 - Acquisition Parameters  
 Date\_ 20061108  
 Time 0.00  
 INSTRUM varian  
 PROBHD 40.5mmroadban  
 PULPROG wgtocsy\_bn  
 TD 4096  
 SOLVENT CDCl3  
 NS 16  
 DS 64  
 SWH 11001.101 Hz  
 FIDRES 2.685816 Hz  
 AQ 0.1862132 sec  
 RG 287.4  
 DW 45.450 usec  
 DE 6.00 usec  
 TE 268.5 K

F1 - Acquisition Parameters  
 ND0 1  
 TD 512  
 SF01 799.8107 MHz  
 FIDRES 21.486525 Hz  
 SW 13.755 ppm  
 F1MODE undefined

F2 - Processing parameters  
 SI 2048  
 SF 799.8064116 MHz  
 WDW QSI  
 SSB 2  
 LB 0.00 Hz  
 GB 0  
 PC 1.40

F1 - Processing parameters  
 SI 2048  
 MC2 States  
 SF 799.8064116 MHz  
 WDW QSI  
 SSB 2  
 LB 0.00 Hz  
 GB 0

2D NMR plot parameters  
 CX2 15.00 cm  
 CX1 15.00 cm  
 F2PLO 5.500 ppm  
 F2LO 4398.94 Hz  
 F2PHI -0.100 ppm  
 F2HI -79.98 Hz  
 F1PLO 11.009 ppm  
 F1LO 8805.10 Hz  
 F1PHI 5.495 ppm  
 F1HI 4394.99 Hz  
 F2PPMCM 0.37333 ppm/cm  
 F2HZCM 298.59439 Hz/cm  
 F1PPMCM 0.36760 ppm/cm  
 F1HZCM 294.00726 Hz/cm

800 MHz TOCSY Spectrum of **1e** in CDCl<sub>3</sub>  
 50 ms mixing time  
 268 K (-5 °C), 1 mM

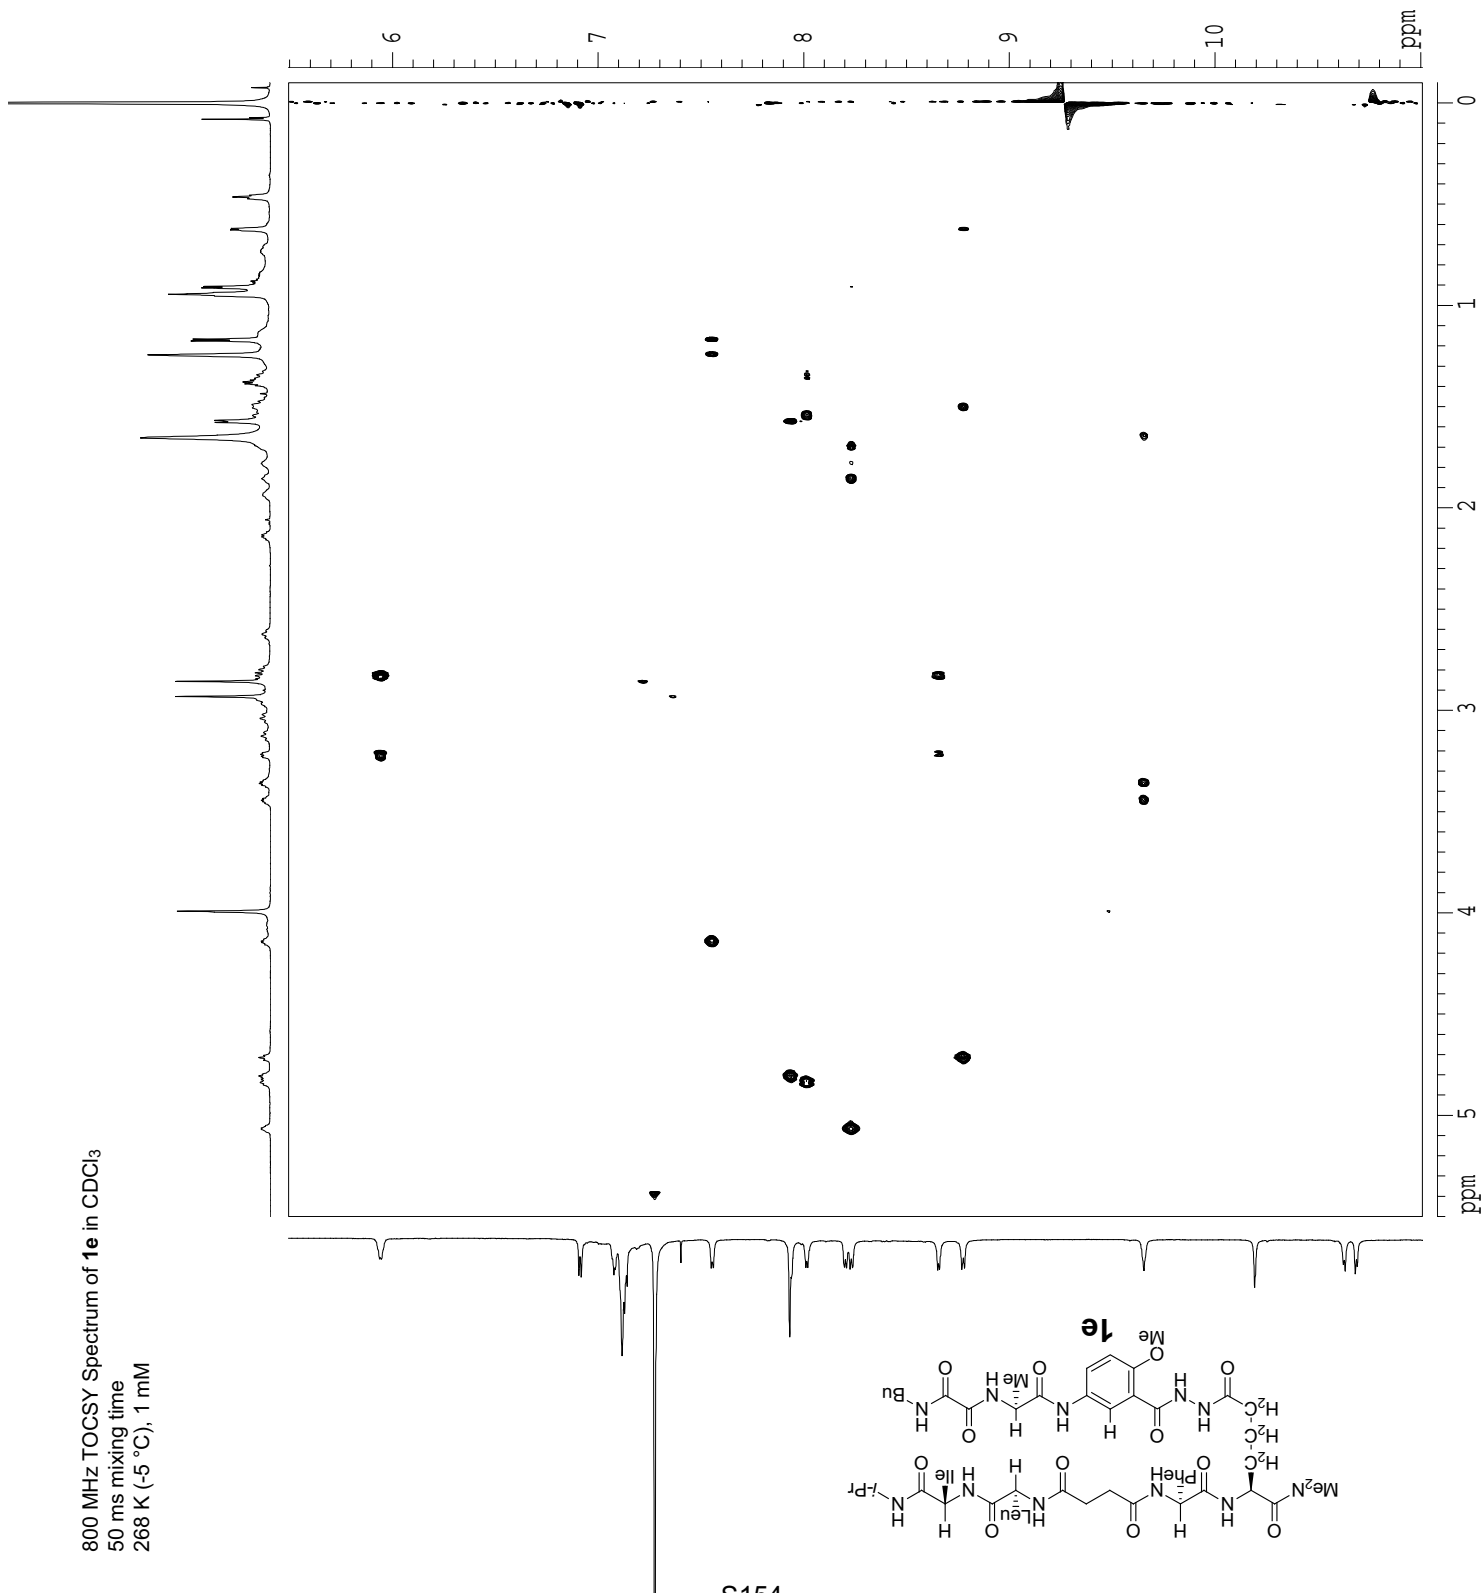

Supporting Information

S. Levin and J. S. Nowick

Current Data Parameters  
 USER slevin  
 NAME SL-7-137-800-H  
 EXPNO 4  
 PROCNO 1

F2 - Acquisition Parameters

Date\_ 20061108  
 Time\_ 0.00  
 INSTRUM varian  
 PROBHD 40:5mmbroadban  
 PULPROG wgtocsy\_bn  
 TD 4096  
 SOLVENT CDCl3  
 NS 16  
 DS 64  
 SWH 11001.101 Hz  
 FIDRES 2.685816 Hz  
 AQ 0.1862132 sec  
 RG 287.4  
 DW 45.450 usec  
 DE 6.00 usec  
 TE 268.5 K

F1 - Acquisition parameters

ND0 1  
 TD 512  
 SFO1 799.8107 MHz  
 FIDRES 21.486525 Hz  
 SW 13.755 ppm  
 F1MODE undefined

F2 - Processing parameters

SI 2048  
 SF 799.8064116 MHz  
 WDW QSTINE  
 SSB 2  
 LB 0.00 Hz  
 GB 0  
 PC 1.40

F1 - Processing parameters

SI 2048  
 MC2 States  
 SF 799.8064116 MHz  
 WDW QSTINE  
 SSB 2  
 LB 0.00 Hz  
 GB 0

2D NMR plot parameters

CX2 15.00 cm  
 CX1 15.00 cm  
 F2PLO 2.200 ppm  
 F2LO 1759.57 Hz  
 F2PHI 0.250 ppm  
 F2HI 199.75 Hz  
 F1PLO 2.200 ppm  
 F1LO 1759.57 Hz  
 F1PHI 0.250 ppm  
 F1HI 199.75 Hz  
 F2PPMCM 0.13002 ppm/cm  
 F2HZCM 103.98820 Hz/cm  
 F1PPMCM 0.13002 ppm/cm  
 F1HZCM 103.98820 Hz/cm

800 MHz TOCSY Spectrum of **1e** in CDCl<sub>3</sub>  
 50 ms mixing time  
 268 K (-5 °C), 1 mM

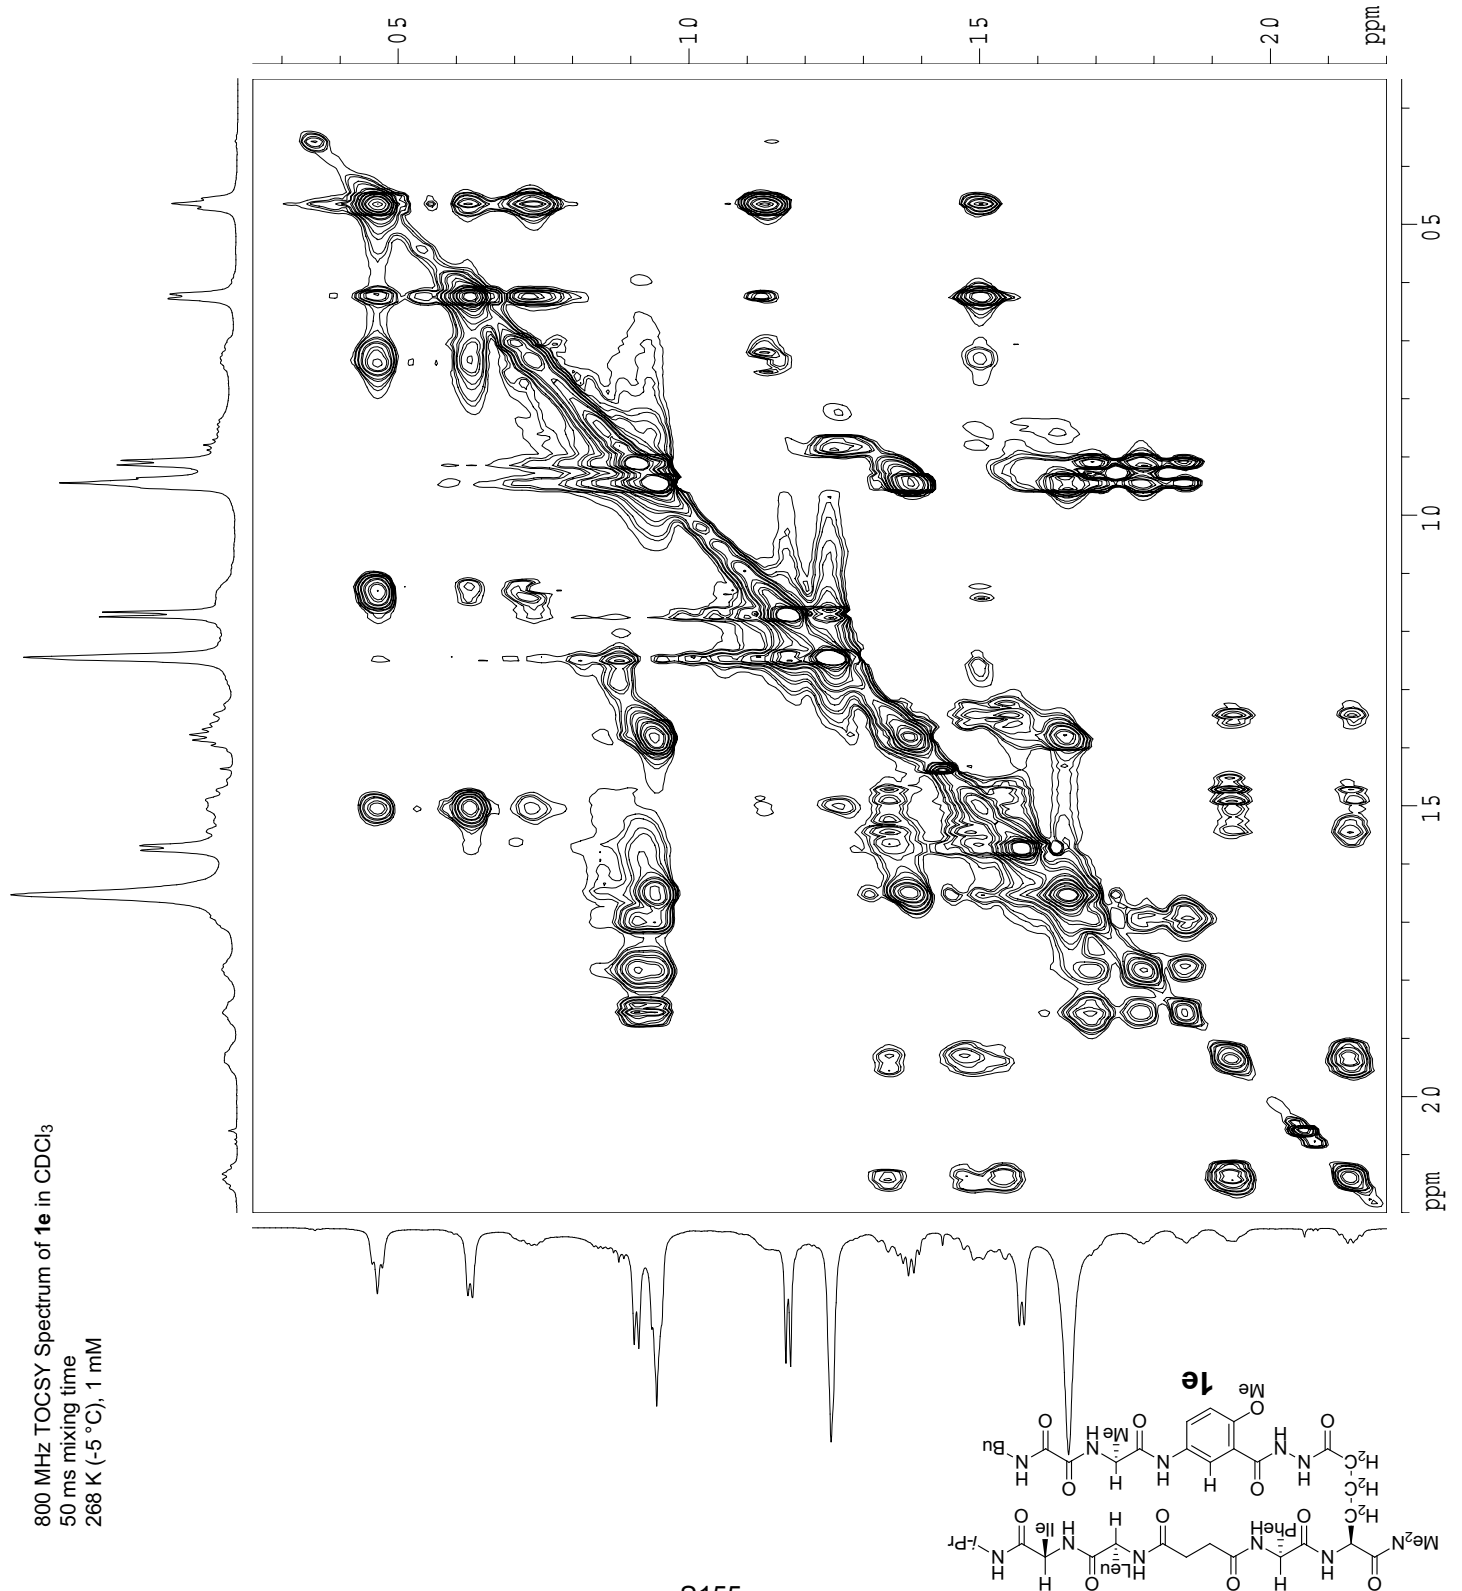

Supporting Information

S. Levin and J. S. Nowick

Current Data Parameters  
 USER slevin  
 NAME SL-7-137-800-H  
 EXNO 5  
 PROCNO 1

F2 - Acquisition Parameters

Date\_ 20061108  
 Time 0.00  
 INSTRUM varian  
 PROBHD 40:5mm broadband  
 PULPROG noesyh2o\_pfg\_800\_pln  
 TD 4096  
 SOLVENT CDCl3  
 NS 16  
 DS 64  
 SMH 11001.101 Hz  
 FIDRES 2.685816 Hz  
 AQ 0.1862132 sec  
 RG 128  
 DW 45.450 usec  
 DE 6.00 usec  
 TE 268.5 K

F1 - Acquisition parameters

ND0 1  
 TD 512  
 SF01 799.8107 MHz  
 FIDRES 21.486525 Hz  
 SW 13.755 ppm  
 F1MODE undefined

F2 - Processing parameters

SI 4096  
 SF 799.8064116 MHz  
 QSI 2  
 SSB 2  
 LB 0.00 Hz  
 GB 0  
 PC 1.40

F1 - Processing parameters

SI 1024  
 MC2 States  
 SF 799.8064116 MHz  
 QSI 2  
 SSB 2  
 LB 0.00 Hz  
 GB 0

2D NMR plot parameters

CX2 15.00 cm  
 CX1 15.00 cm  
 F2PLO 11.000 ppm  
 F2LO 8797.87 Hz  
 F2PHI -0.100 ppm  
 F2HI -79.98 Hz  
 F1PLO 11.000 ppm  
 F1LO 8797.87 Hz  
 F1PHI -0.100 ppm  
 F1HI -79.98 Hz  
 F2PPMCM 0.74000 ppm/cm  
 F2HZCM 591.85669 Hz/cm  
 F1PPMCM 0.74000 ppm/cm  
 F1HZCM 591.85669 Hz/cm

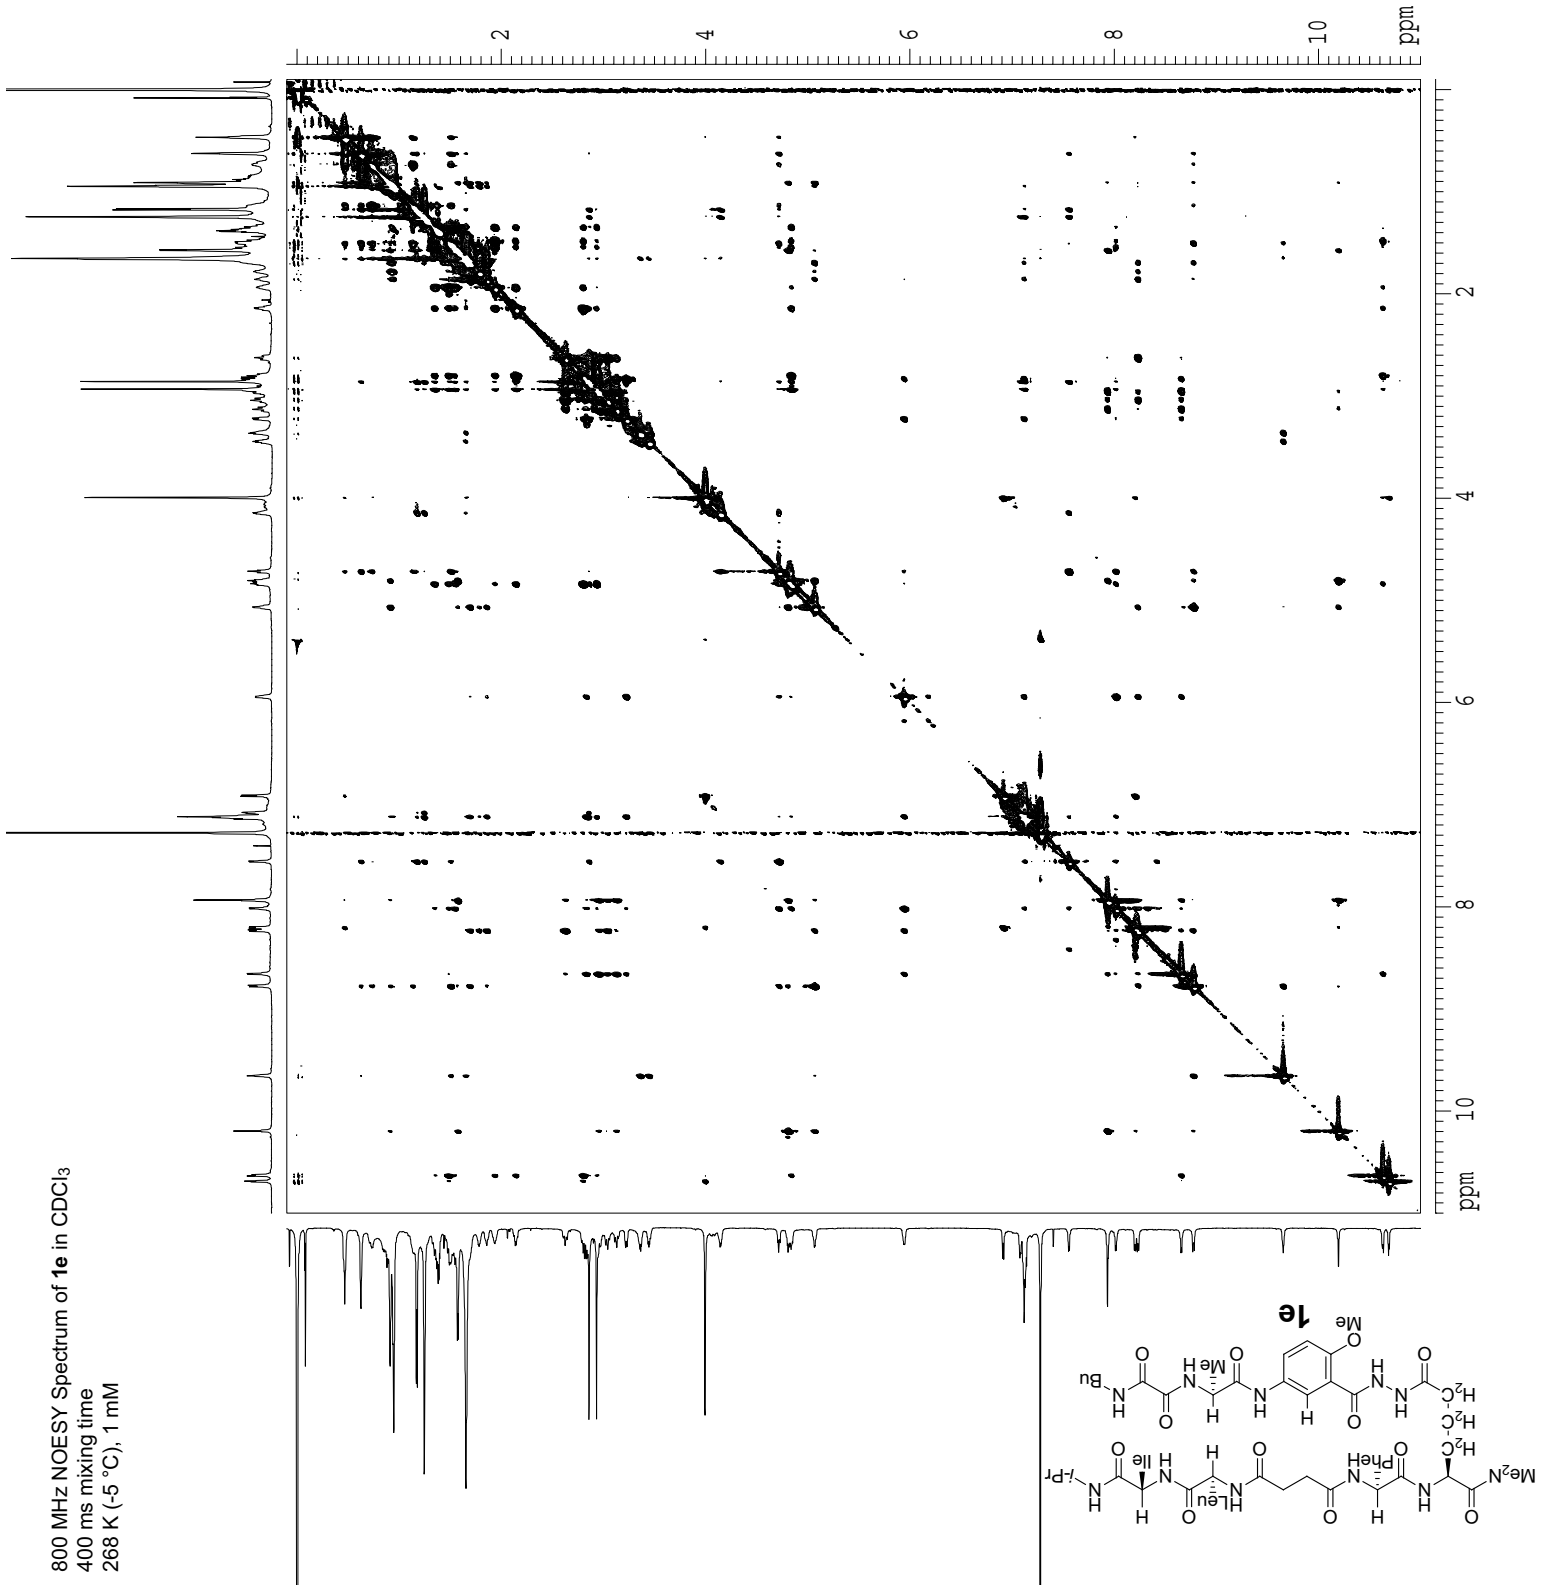

800 MHz NOESY Spectrum of **1e** in CDCl<sub>3</sub>  
 400 ms mixing time  
 268 K (-5 °C), 1 mM

Supporting Information

S. Levin and J. S. Nowick

Current Data Parameters  
 USER slevin  
 NAME SL-7-137-800-H  
 EXPNO 5  
 PROCNO 1

F2 - Acquisition Parameters

Date\_ 20061108  
 Time 0.00  
 INSTRUM varian  
 PROBHD 40:5mm broadband  
 PULPROG noesyh2o\_pfg\_800\_pln  
 TD 4096  
 SOLVENT CDCl3  
 NS 16  
 DS 64  
 SWH 11001.101 Hz  
 FIDRES 2.685816 Hz  
 AQ 0.1862132 sec  
 RG 128  
 DW 45.450 usec  
 DE 6.00 usec  
 TE 268.5 K

F1 - Acquisition Parameters

ND0 1  
 TD 512  
 SF01 799.8107 MHz  
 FIDRES 21.486525 Hz  
 SW 13.755 ppm  
 F1MODE undefined

F2 - Processing parameters

SI 4096  
 SF 799.8064116 MHz  
 QSIINE QSIINE  
 SSB 2  
 LB 0.00 Hz  
 GB 0  
 PC 1.40

F1 - Processing parameters

SI 1024  
 MC2 States  
 SF 799.8064116 MHz  
 QSIINE QSIINE  
 SSB 2  
 LB 0.00 Hz  
 GB 0

2D NMR plot parameters

CX2 15.00 cm  
 CX1 15.00 cm  
 F2PLO 11.000 ppm  
 F2LO 8797.87 Hz  
 F2PHI -0.100 ppm  
 F2HI -79.98 Hz  
 F1PLO 11.000 ppm  
 F1LO 8797.87 Hz  
 F1PHI -0.100 ppm  
 F1HI -79.98 Hz  
 F2PPMCM 0.74000 ppm/cm  
 F2HZCM 591.85669 Hz/cm  
 F1PPMCM 0.74000 ppm/cm  
 F1HZCM 591.85669 Hz/cm

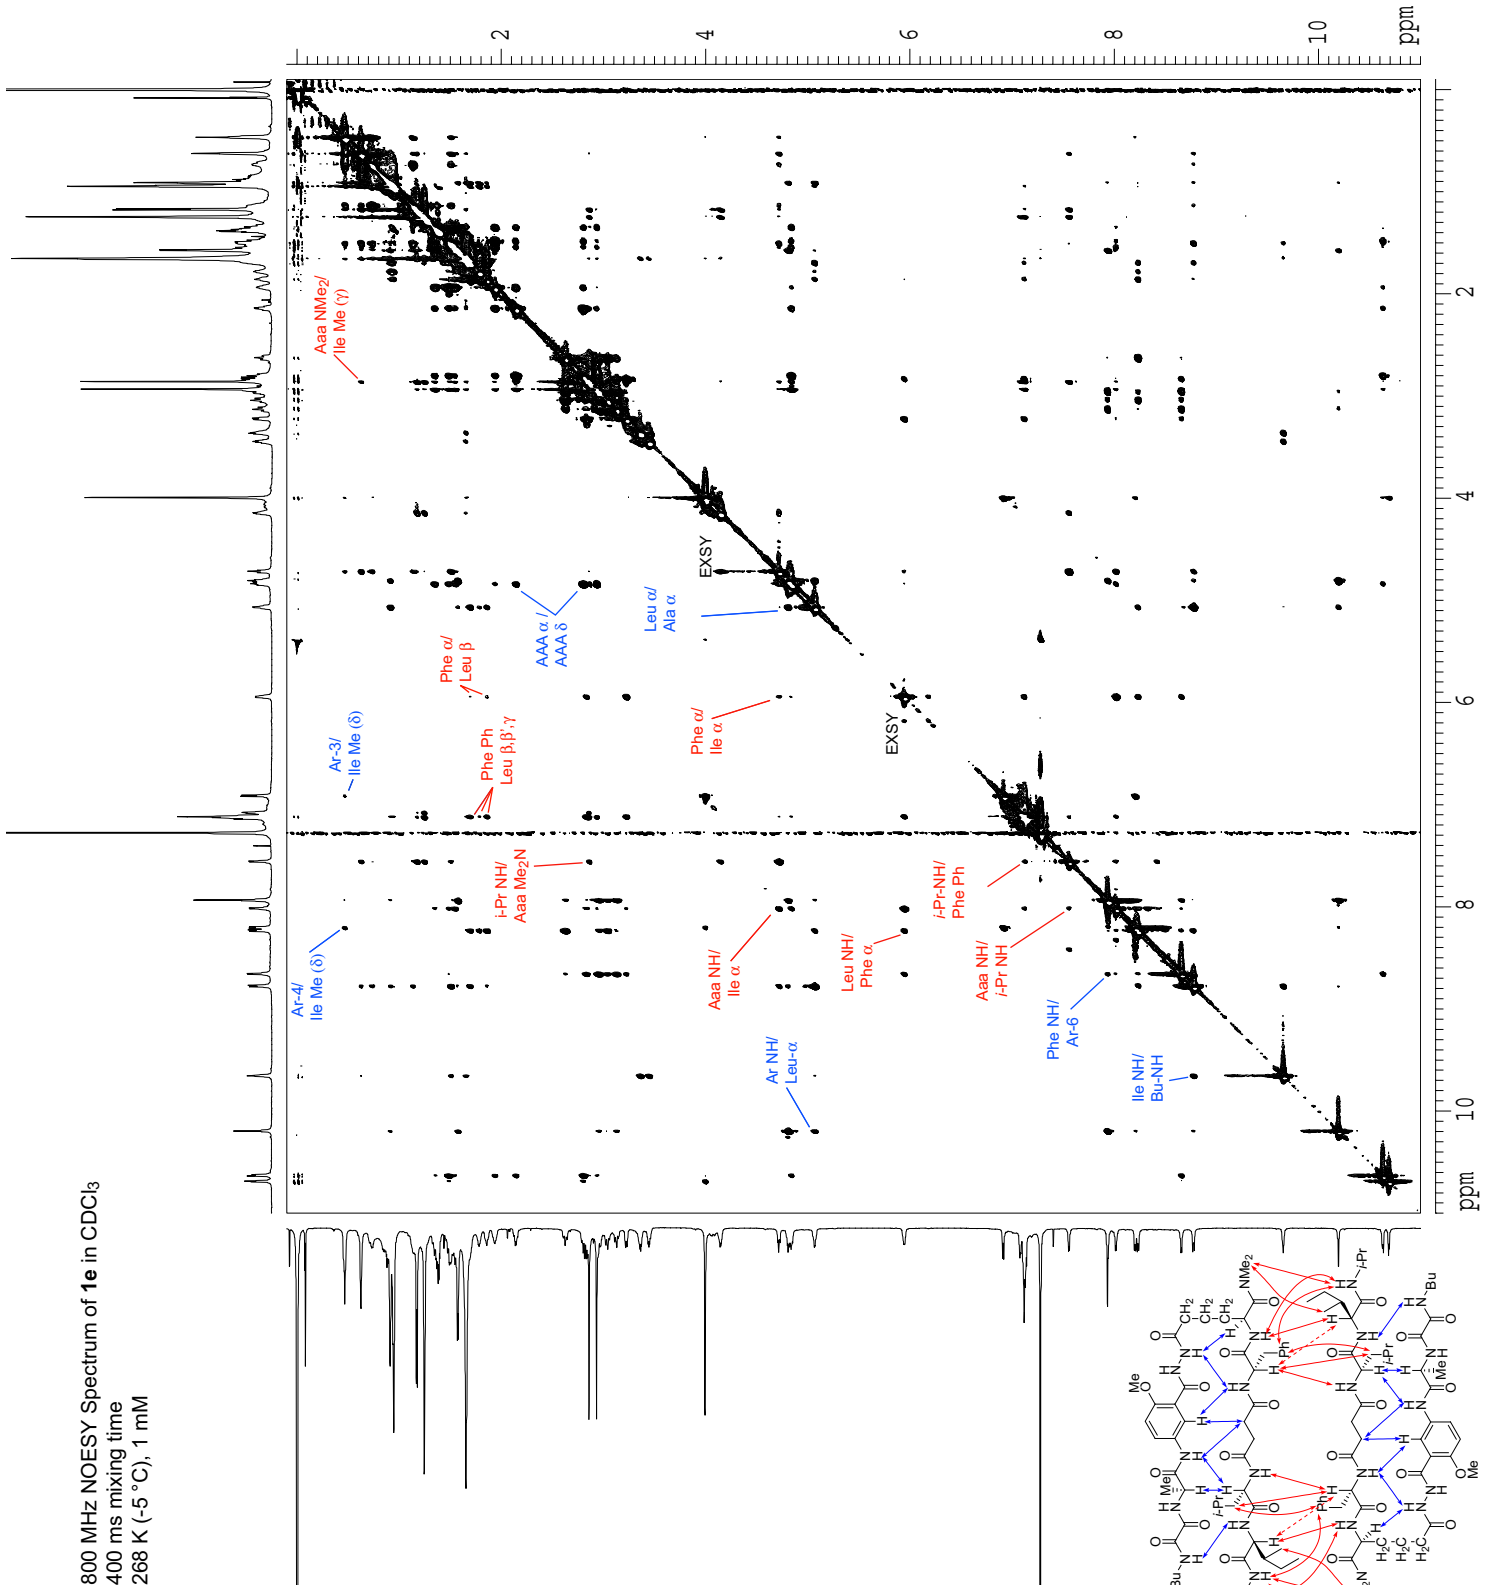

800 MHz NOESY Spectrum of **1e** in CDCl<sub>3</sub>  
 400 ms mixing time  
 268 K (-5 °C), 1 mM

800 MHz NOESY Spectrum of **1e** in CDCl<sub>3</sub>  
 400 ms mixing time  
 268 K (-5 °C), 1 mM

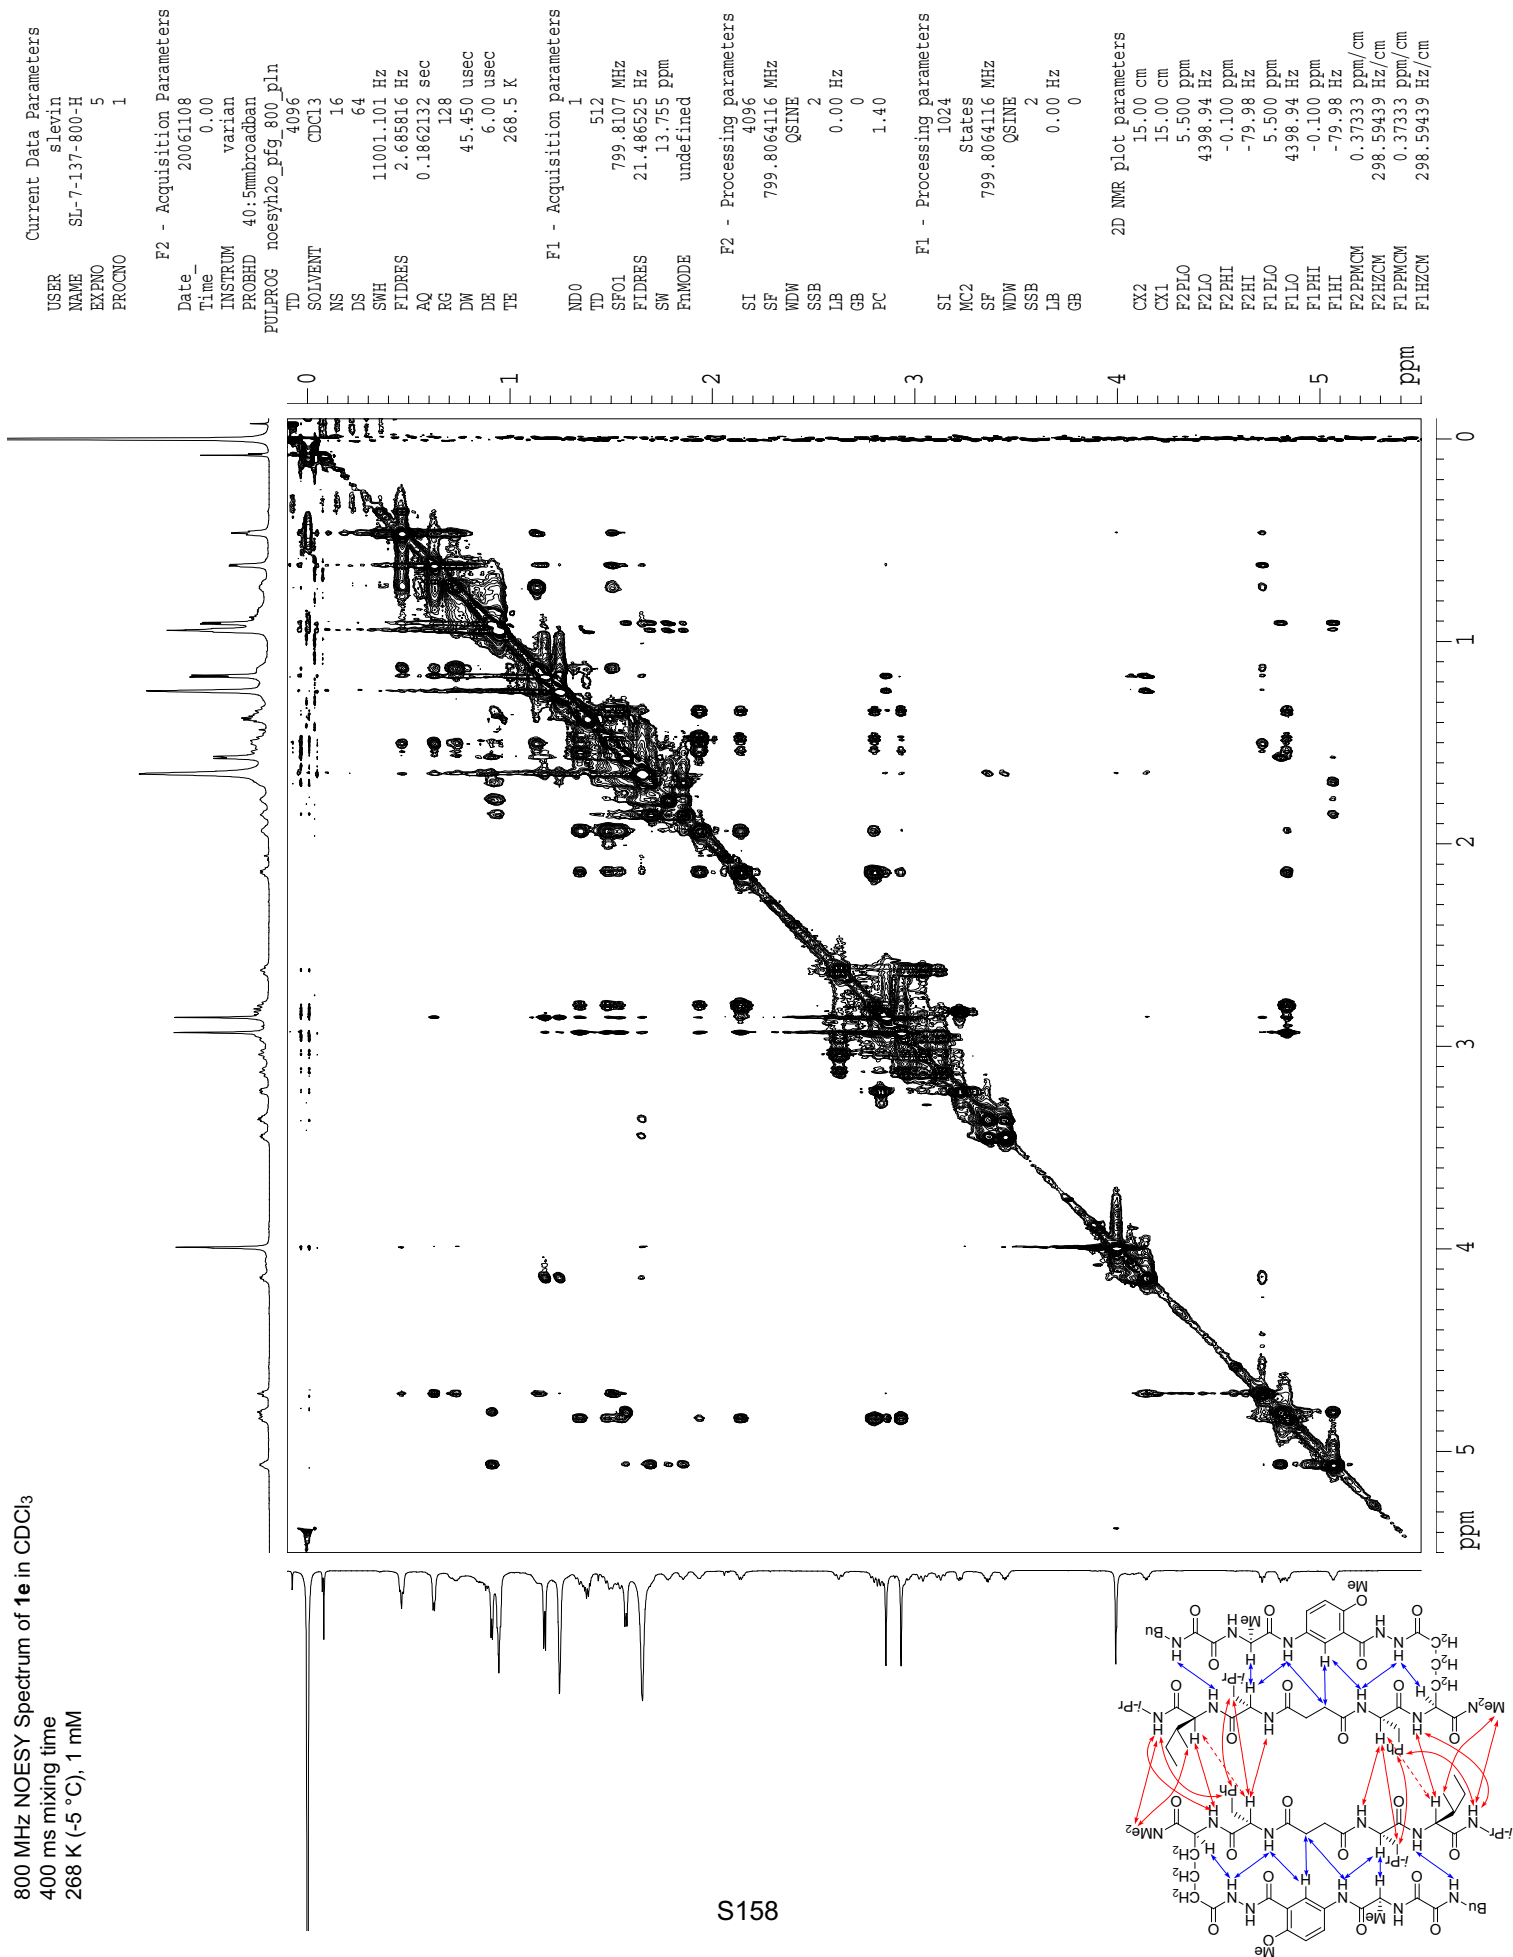

Current Data Parameters  
 USER slevin  
 NAME SL-7-137-800-H  
 EXPNO 5  
 PROCNO 1

F2 - Acquisition Parameters  
 Date\_ 20061108  
 Time\_ 0.00  
 INSTRUM varian  
 PROBHD 40:5mm broadband  
 PULPROG noesyh2o\_pfg 800\_p1n  
 TD 4096  
 SOLVENT CDCl3  
 NS 16  
 DS 64  
 SWH 11001.101 Hz  
 FIDRES 2.685816 Hz  
 AQ 0.1862132 sec  
 RG 128  
 DW 45.450 usec  
 DE 6.00 usec  
 TE 268.5 K

F1 - Acquisition Parameters  
 ND0 1  
 TD 512  
 SF01 799.8107 MHz  
 FIDRES 21.486525 Hz  
 SW 13.755 ppm  
 FMODE undefined

F2 - Processing parameters  
 SI 4096  
 SF 799.8064116 MHz  
 WDW QSINE  
 SSB 2  
 LB 0.00 Hz  
 GB 0  
 PC 1.40

F1 - Processing parameters  
 SI 1024  
 MC2 States  
 SF 799.8064116 MHz  
 WDW QSINE  
 SSB 2  
 LB 0.00 Hz  
 GB 0

2D NMR plot parameters  
 CX2 15.00 cm  
 CX1 15.00 cm  
 F2PLO 11.002 ppm  
 F2LO 8799.73 Hz  
 F2PHI 5.500 ppm  
 F2HI 4398.93 Hz  
 F1PLO 5.502 ppm  
 F1LO 4400.37 Hz  
 F1PHI -0.126 ppm  
 F1HI -101.06 Hz  
 F2PPMCM 0.36682 ppm/cm  
 F2HZCM 293.38644 Hz/cm  
 F1PPMCM 0.37521 ppm/cm  
 F1HZCM 300.09509 Hz/cm

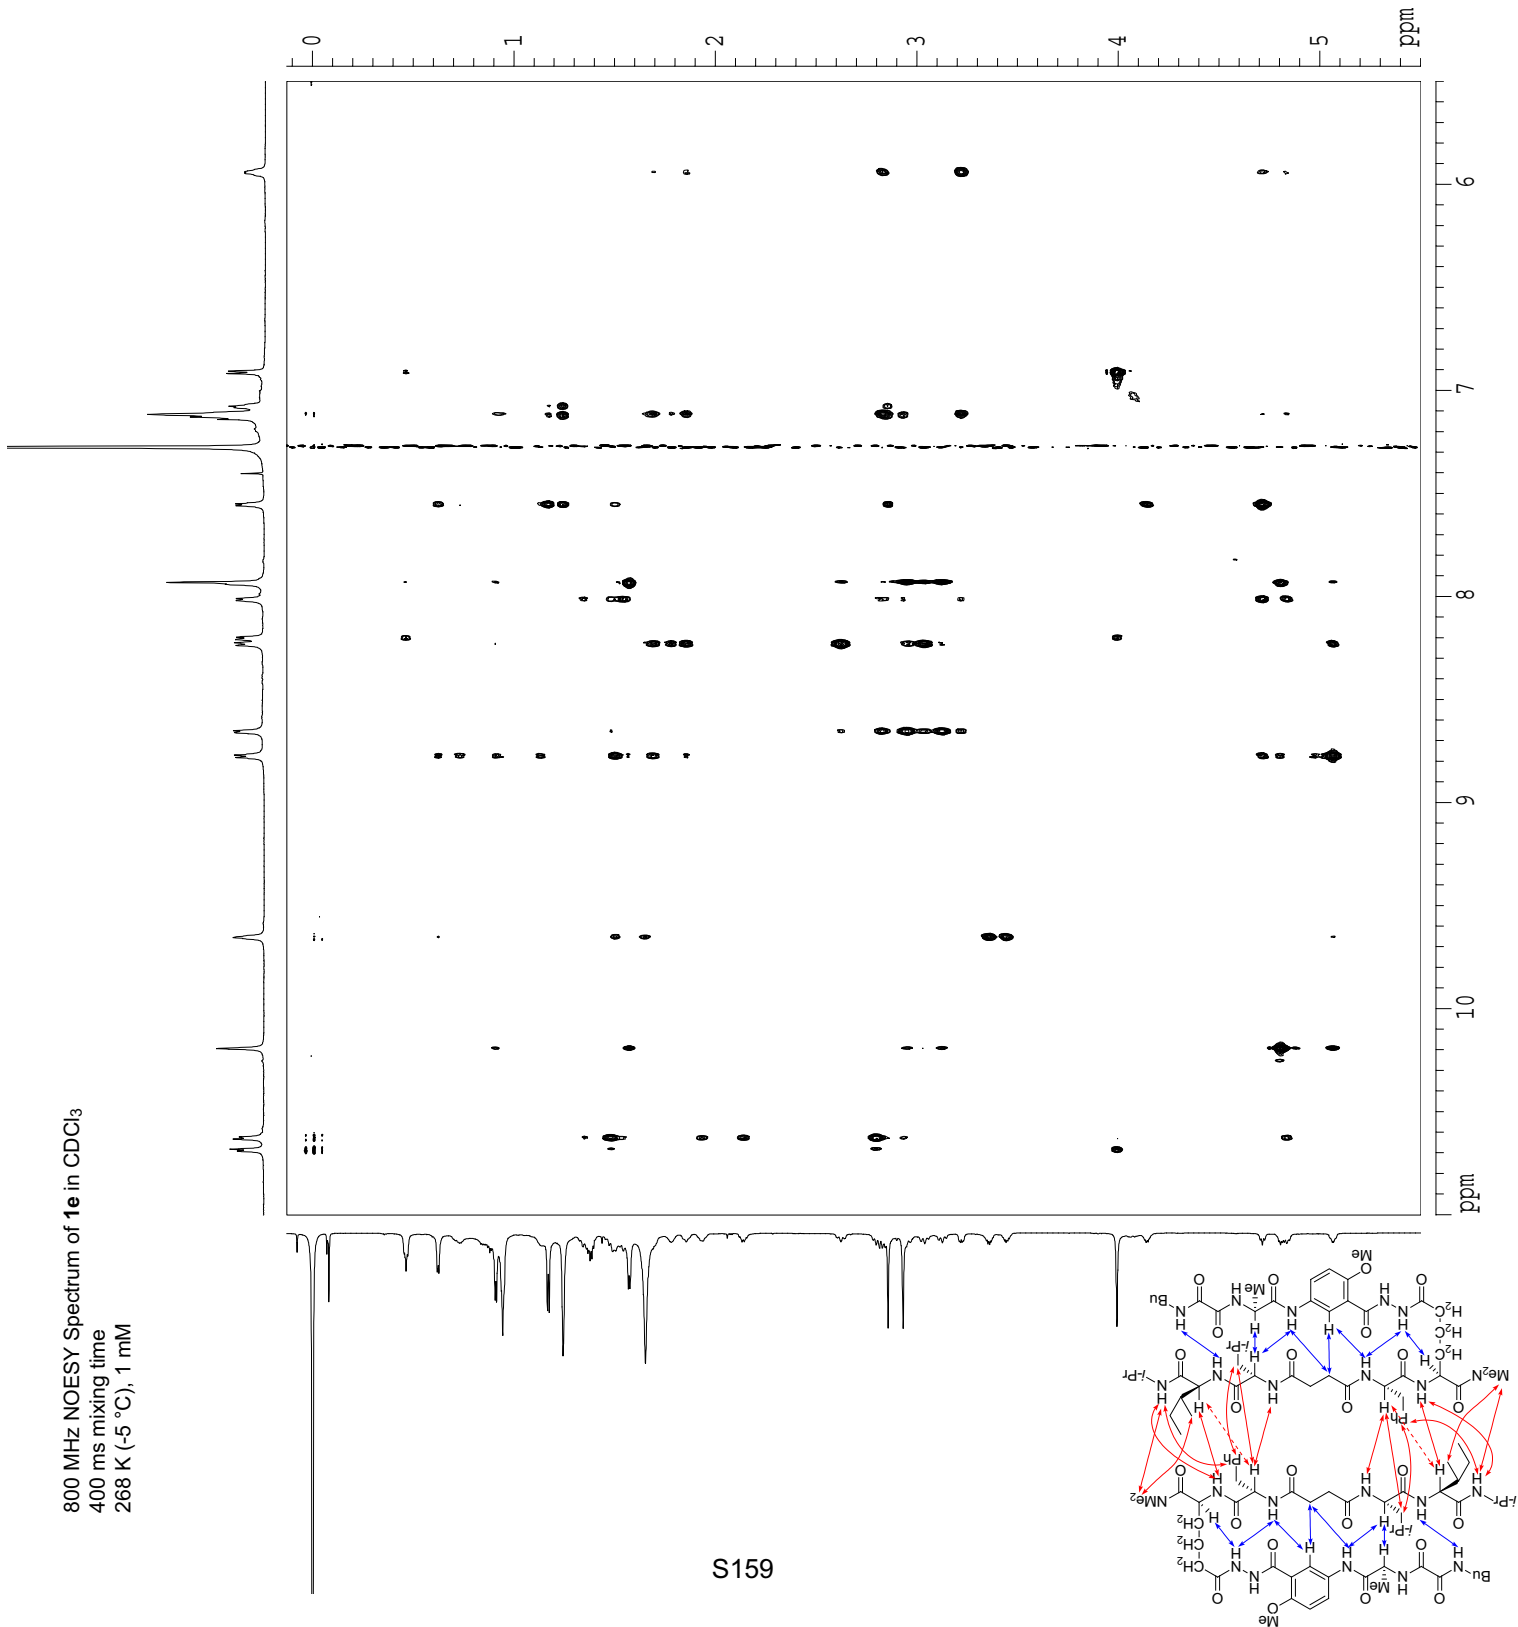

800 MHz NOESY Spectrum of **1e** in CDCl<sub>3</sub>  
 400 ms mixing time  
 268 K (-5 °C), 1 mM

Supporting Information

S. Levin and J. S. Nowick

Current Data Parameters  
 USER slevin  
 NAME SL-7-137-800-H  
 EXPNO 5  
 PROCNO 1

F2 - Acquisition Parameters

Date\_ 20061108  
 Time 0.00  
 INSTRUM varian  
 PROBHD 40:5mm broadband  
 PULPROG noesyh2o\_pfg\_800\_pln  
 TD 4096  
 SOLVENT CDCl3  
 NS 16  
 DS 64  
 SWH 11001.101 Hz  
 FIDRES 2.685816 Hz  
 AQ 0.1862132 sec  
 RG 128  
 DW 45.450 usec  
 DE 6.00 usec  
 TE 268.5 K

F1 - Acquisition Parameters

ND0 1  
 TD 512  
 SFO1 799.8107 MHz  
 FIDRES 21.486525 Hz  
 SW 13.755 ppm  
 F1MODE undefined

F2 - Processing parameters

SI 4096  
 SF 799.8064116 MHz  
 MDW QSINE  
 SSB 2  
 LB 0.00 Hz  
 GB 0  
 PC 1.40

F1 - Processing parameters

SI 1024  
 MC2 States  
 SF 799.8064116 MHz  
 MDW QSINE  
 SSB 2  
 LB 0.00 Hz  
 GB 0

2D NMR plot parameters

CX2 15.00 cm  
 CX1 15.00 cm  
 F2PLO 11.006 ppm  
 F2LO 8802.42 Hz  
 F2PHI 5.500 ppm  
 F2HI 4398.94 Hz  
 F1PLO 11.000 ppm  
 F1LO 8797.87 Hz  
 F1PHI 5.500 ppm  
 F1HI 4398.94 Hz  
 F2PFCM 0.36705 ppm/cm  
 F2H2CM 293.56552 Hz/cm  
 F1PFCM 0.36667 ppm/cm  
 F1H2CM 293.26236 Hz/cm

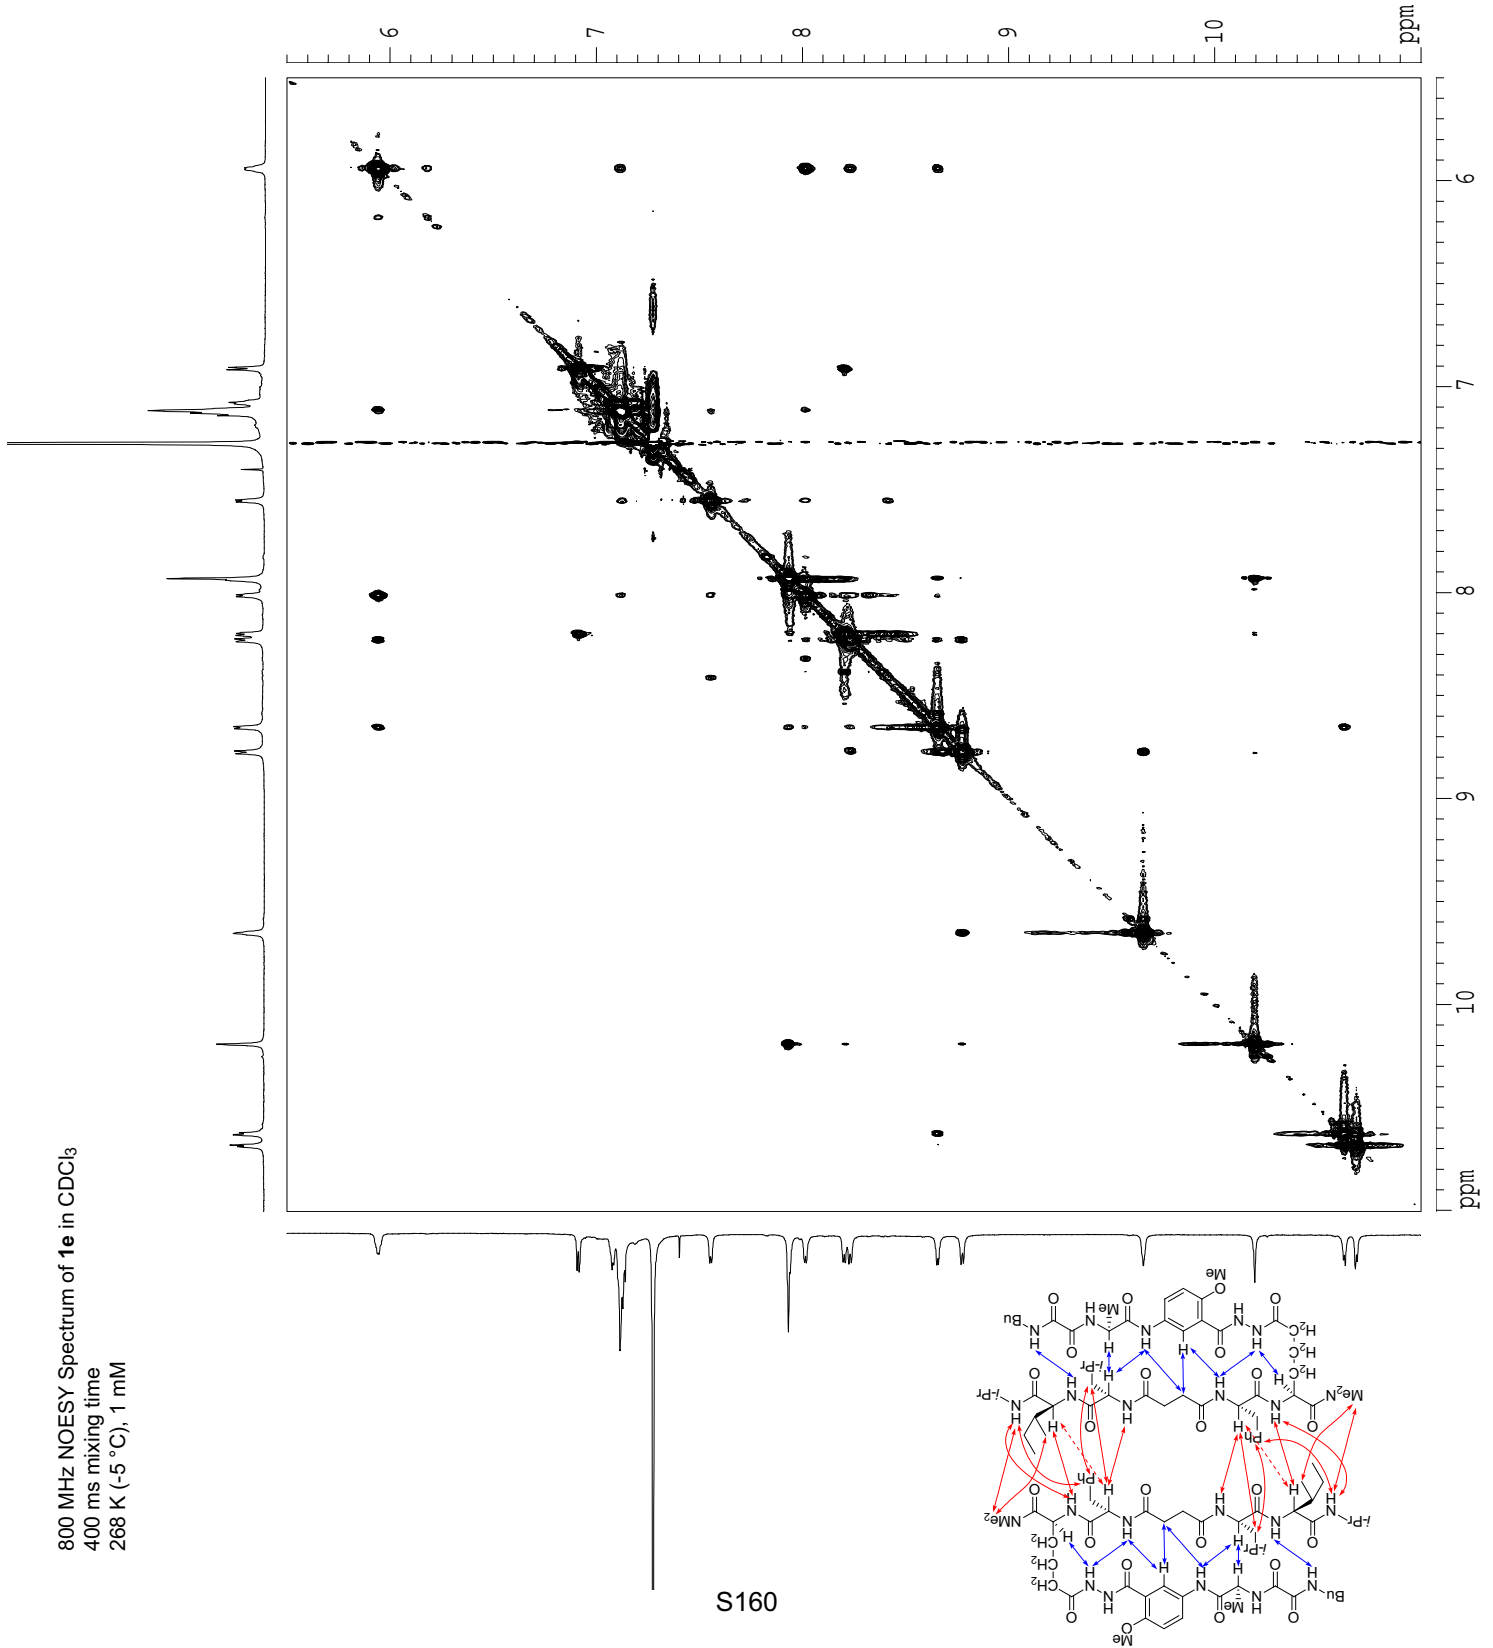

800 MHz NOESY Spectrum of **1e** in CDCl<sub>3</sub>  
 400 ms mixing time  
 268 K (-5 °C), 1 mM



Current Data Parameters  
 USER sleivin  
 NAME SL-7-137-800-H  
 EXPNO 5  
 PROCNO 1

## F2 - Acquisition Parameters

Date\_ 20061108  
 Time\_ 0.00  
 INSTRUM varian  
 PROBHD 40:5mmbrodban  
 PULPROG noesy2o\_pfg\_800\_p1n  
 TD 4096  
 SOLVENT CDCl3  
 NS 16  
 DS 64  
 SWH 11001.101 Hz  
 FIDRES 2.685816 Hz  
 AQ 0.1862132 sec  
 RG 128  
 DW 45.450 usec  
 DE 6.00 usec  
 TE 268.5 K

## F1 - Acquisition parameters

ND0 1  
 TD 512  
 SF01 799.8107 MHz  
 FIDRES 21.486525 Hz  
 SW 13.755 ppm  
 FMODE undefined

## F2 - Processing parameters

SI 4096  
 SF 799.8064116 MHz  
 WDM QSINE  
 SSB 2  
 LB 0.00 Hz  
 GB 0  
 PC 1.40

## F1 - Processing parameters

SI 1024  
 MC2 States  
 SF 799.8064116 MHz  
 WDM QSINE  
 SSB 2  
 LB 0.00 Hz  
 GB 0

## 2D NMR plot parameters

CX2 15.00 cm  
 CX1 15.00 cm  
 F2PLO 5.500 ppm  
 F2LO 4398.94 Hz  
 F2PHI -0.100 ppm  
 F2HI -79.98 Hz  
 F1PLO 11.009 ppm  
 F1LO 8805.10 Hz  
 F1PHI 5.488 ppm  
 F1HI 4389.62 Hz  
 F2PPMCM 0.37333 ppm/cm  
 F2HZCM 298.59439 Hz/cm  
 F1PPMCM 0.36805 ppm/cm  
 F1HZCM 294.36536 Hz/cm

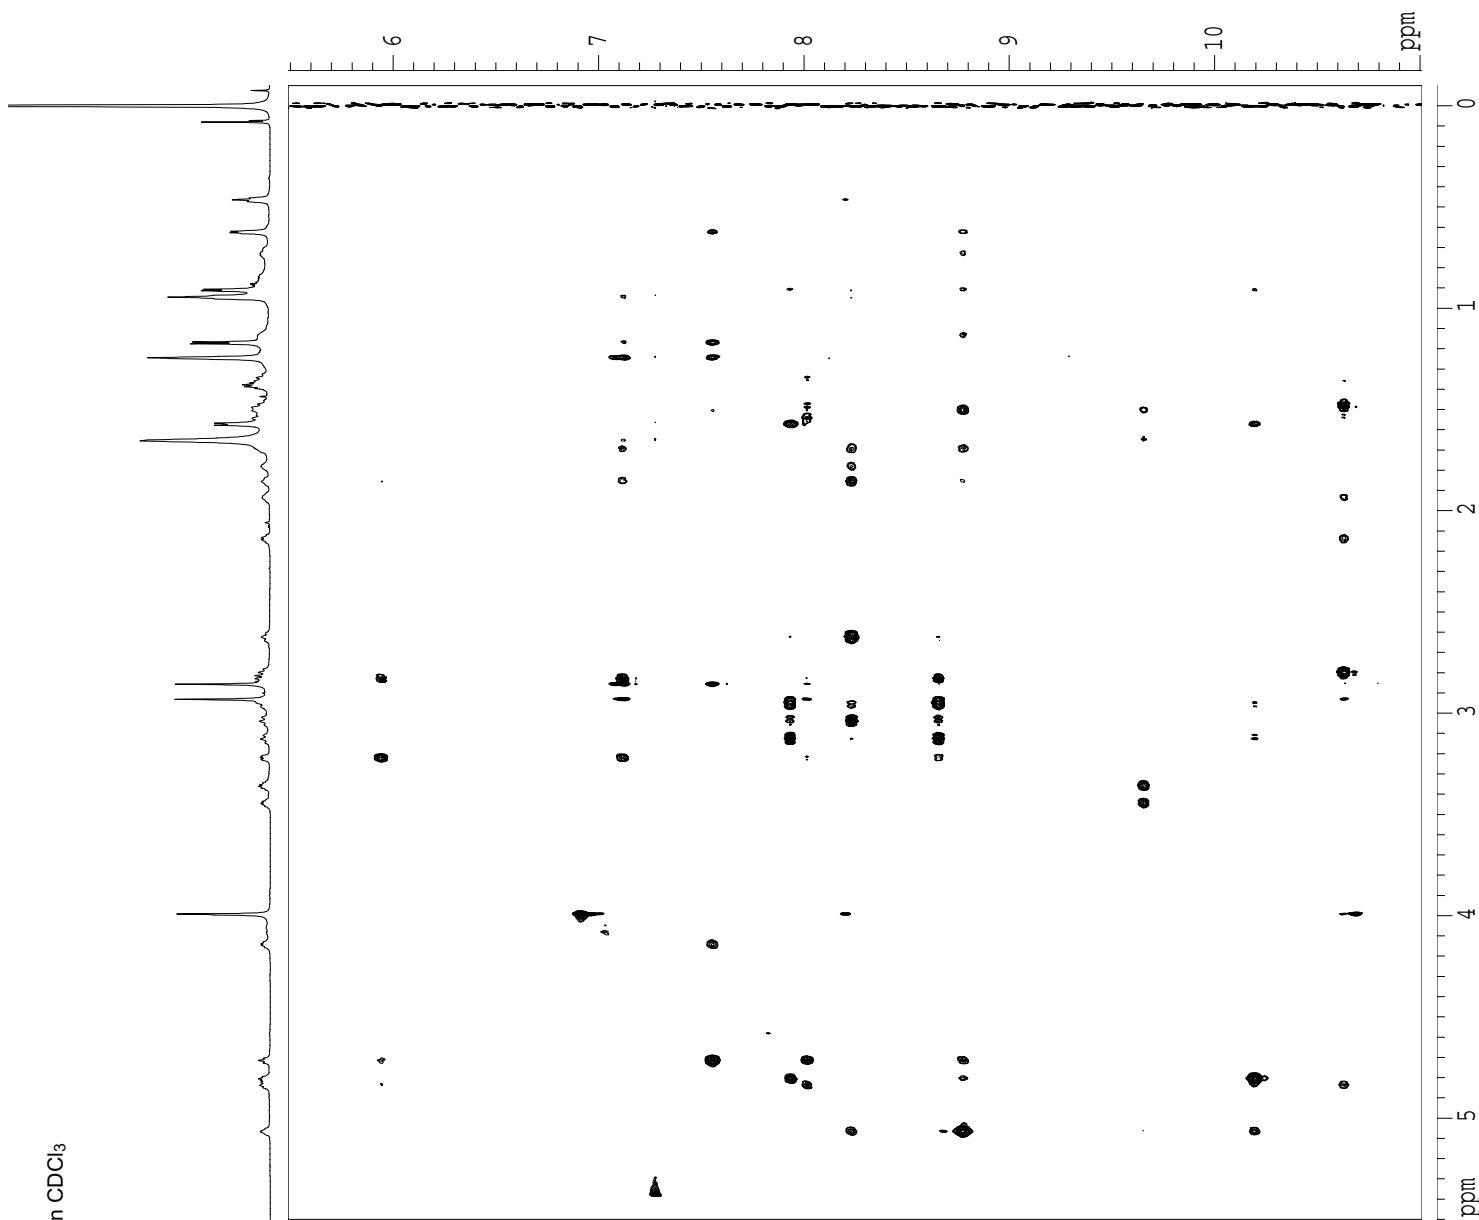

800 MHz NOESY Spectrum of **1e** in CDCl<sub>3</sub>  
 400 ms mixing time  
 268 K (-5 °C), 1 mM

Supporting Information

S. Levin and J. S. Nowick

Current Data Parameters  
 USER slevin  
 NAME SL-7-137-800-H  
 EXPNO 5  
 PROCNO 1

F2 - Acquisition Parameters

Date\_ 20061108  
 Time 0.00  
 INSTRUM varian  
 PROBHD 40:5mm broadband  
 PULPROG noesyh2o\_pfg\_800\_pln  
 TD 4096  
 SOLVENT CDCl3  
 NS 16  
 DS 64  
 SWH 11001.101 Hz  
 FIDRES 2.685816 Hz  
 AQ 0.1862132 sec  
 RG 128  
 DW 45.450 usec  
 DE 6.00 usec  
 TE 268.5 K

F1 - Acquisition Parameters

ND0 1  
 TD 512  
 SF01 799.8107 MHz  
 FIDRES 21.486525 Hz  
 SW 13.755 ppm  
 FMODE undefined

F2 - Processing parameters

SI 4096  
 SF 799.8064116 MHz  
 WDW QSINE  
 SSB 2  
 LB 0.00 Hz  
 GB 0  
 PC 1.40

F1 - Processing parameters

SI 1024  
 MC2 States  
 SF 799.8064116 MHz  
 WDW QSINE  
 SSB 2  
 LB 0.00 Hz  
 GB 0

2D NMR plot parameters

CX2 15.00 cm  
 CX1 15.00 cm  
 F2PLO 10.888 ppm  
 F2LO 8708.41 Hz  
 F2PHI 6.751 ppm  
 F2HI 5399.49 Hz  
 F1PLO 8.967 ppm  
 F1LO 7172.13 Hz  
 F1HI 3.769 ppm  
 F1HI 3014.49 Hz  
 F2PNCM 0.27581 ppm/cm  
 F2HZCM 220.59497 Hz/cm  
 F1PNCM 0.34655 ppm/cm  
 F1HZCM 277.17615 Hz/cm

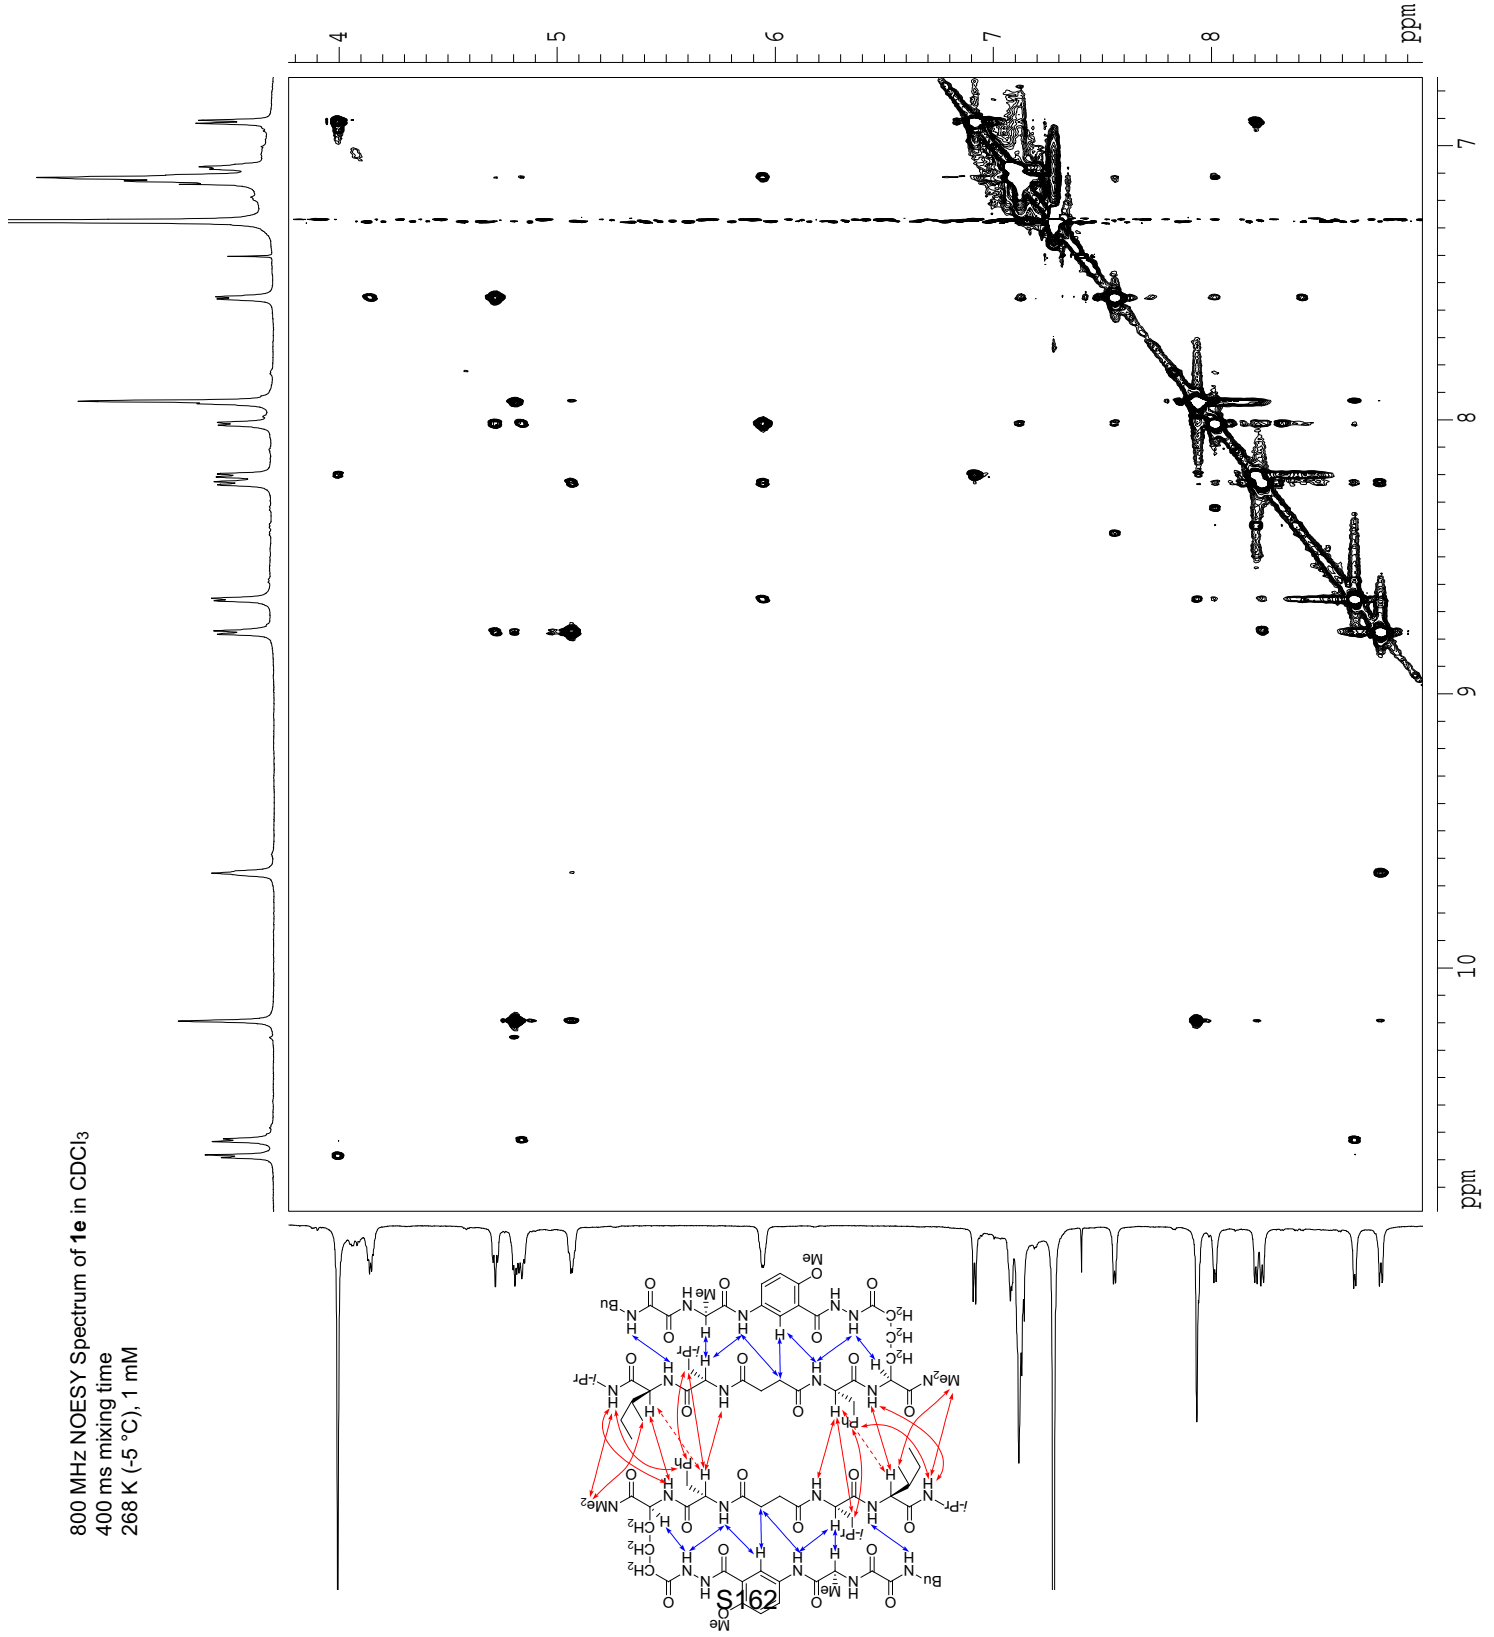

800 MHz NOESY Spectrum of **1e** in CDCl<sub>3</sub>  
 400 ms mixing time  
 268 K (-5 °C), 1 mM

Supporting Information

S. Levin and J. S. Nowick

Current Data Parameters  
 USER slevin  
 NAME SL-7-137-800-H  
 EXPNO 5  
 PROCNO 1

F2 - Acquisition Parameters  
 Date\_ 20061108  
 Time 0.00

INSTRUM varian  
 PROBRD 40:5mmrbroadban  
 PULPROG noesyh2o\_pfg\_800\_pln  
 TD 4096  
 SOLVENT CDCl3  
 NS 16  
 DS 64  
 SWH 11001.101 Hz  
 FIDRES 2.683816 Hz  
 AQ 0.1862132 sec  
 RG 128  
 DM 45.450 usec  
 DE 6.00 usec  
 TE 268.5 K

F1 - Acquisition parameters  
 ND0 1  
 TD 512  
 SF01 799.8107 MHz  
 FIDRES 21.486525 Hz  
 SW 13.755 ppm  
 FreqMODE undefined

F2 - Processing parameters  
 SI 4096  
 SF 799.8064116 MHz  
 WDM QSINE  
 SSB 2  
 LB 0.00 Hz  
 GB 0  
 PC 1.40

F1 - Processing parameters  
 SI 1024  
 MC2 States  
 SF 799.8064116 MHz  
 WDM QSINE  
 SSB 2  
 LB 0.00 Hz  
 GB 0

2D NMR plot parameters  
 CX2 15.00 cm  
 CX1 15.00 cm  
 F2PLO 2.200 ppm  
 F2LO 1759.57 Hz  
 F2PHI 0.250 ppm  
 F2HI 199.95 Hz  
 F1LO 1759.57 Hz  
 F1HI 124.55 Hz  
 F2PPMCM 0.13000 ppm/cm  
 F2HZCM 103.97483 Hz/cm  
 F1PPMCM 0.13629 ppm/cm  
 F1HZCM 109.00172 Hz/cm

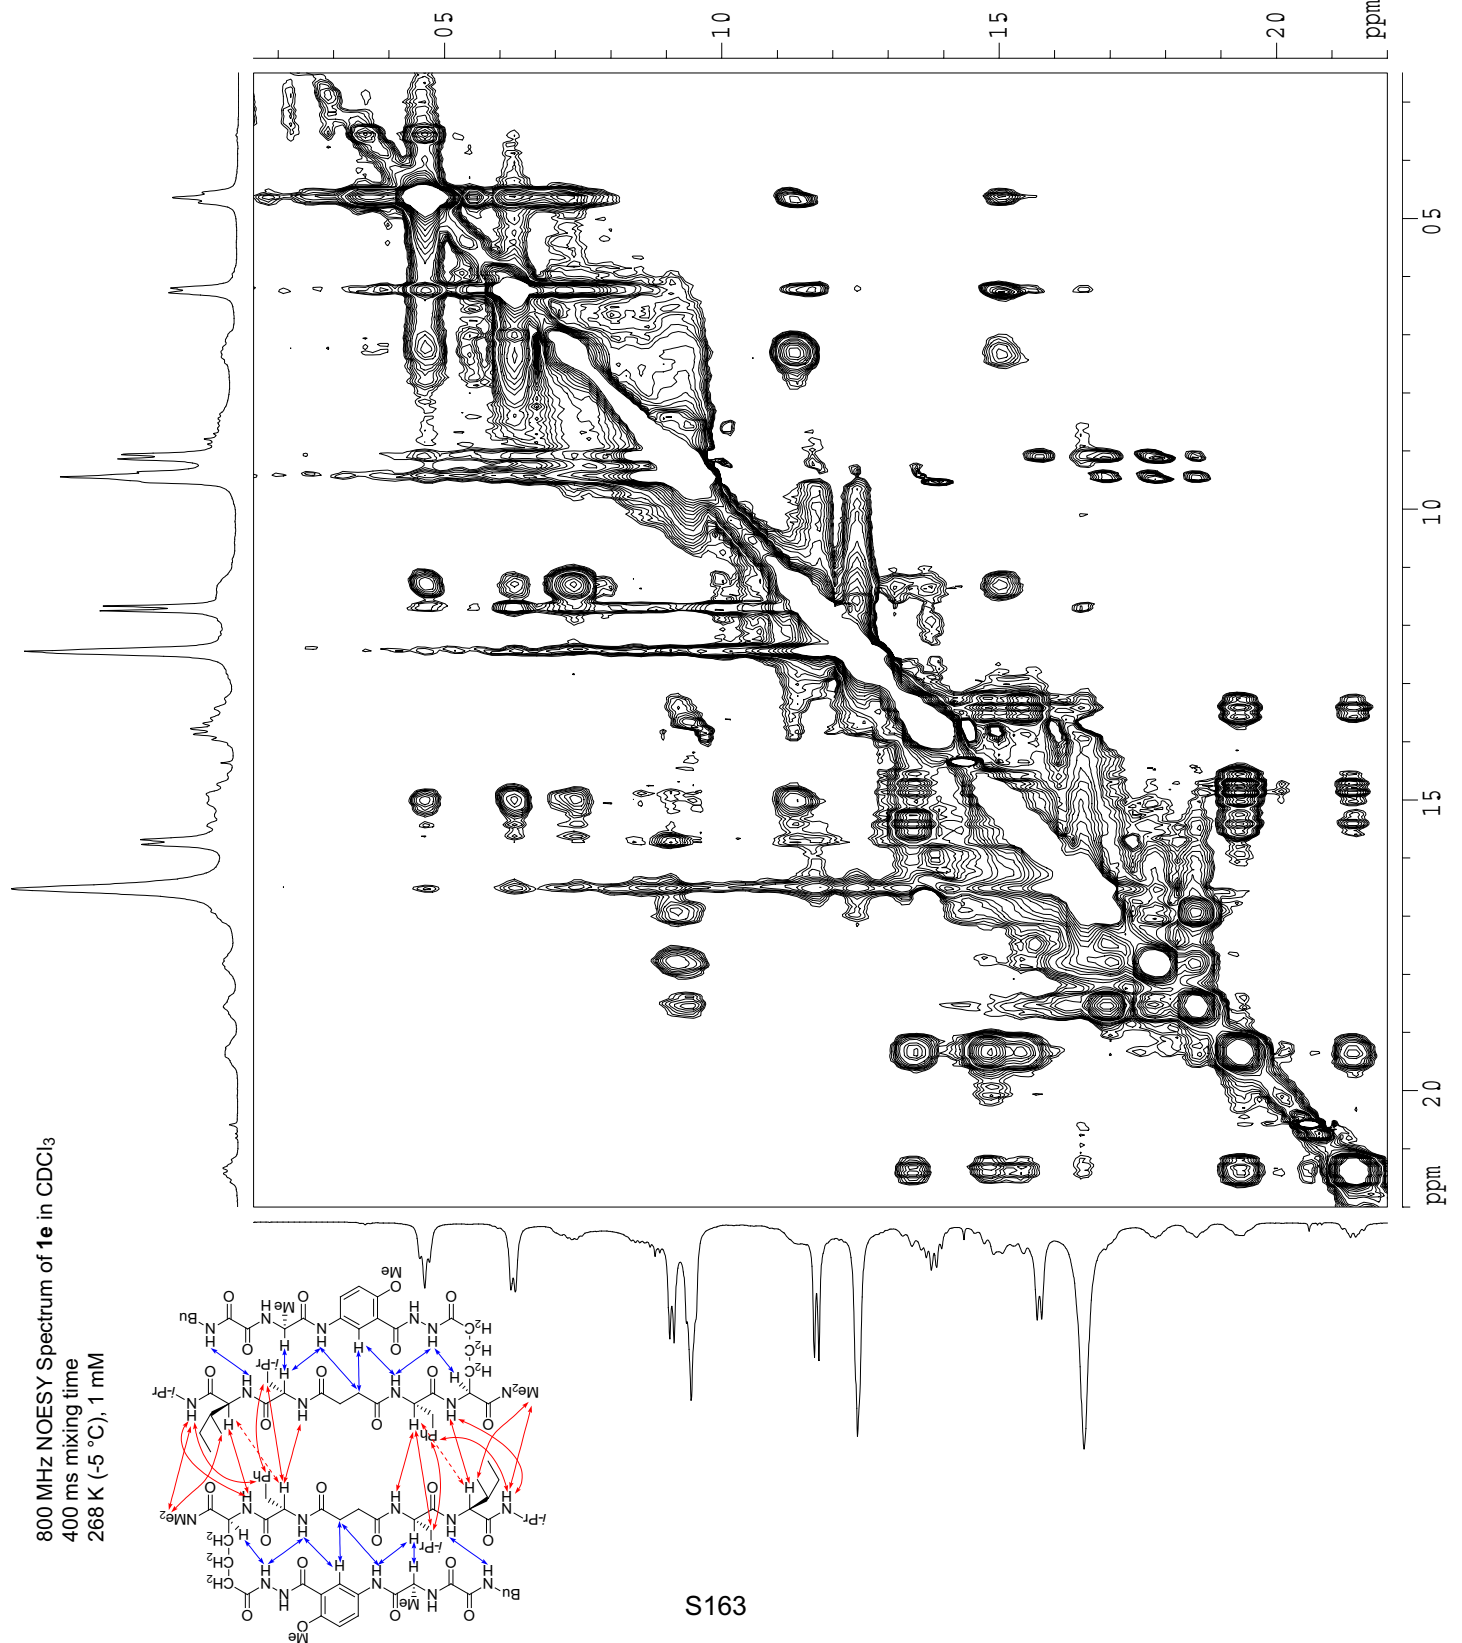

800 MHz NOESY Spectrum of **1e** in CDCl<sub>3</sub>  
400 ms mixing time  
268 K (-5 °C), 1 mM

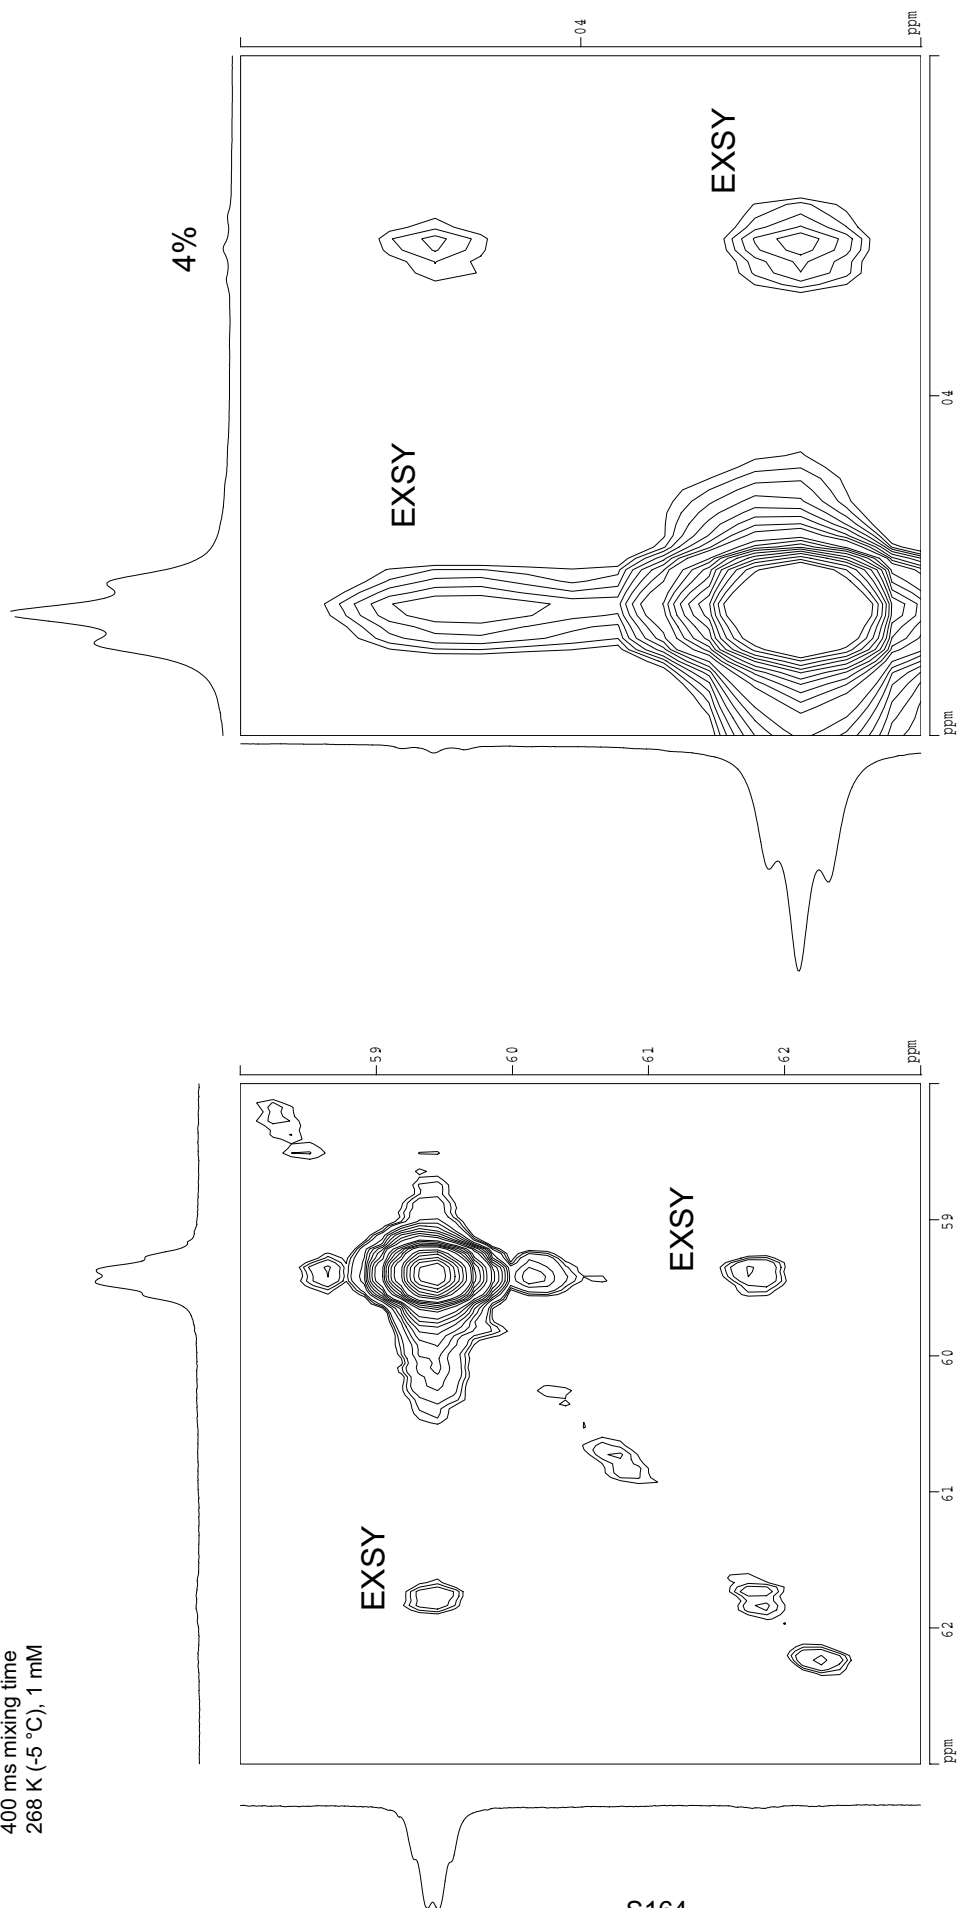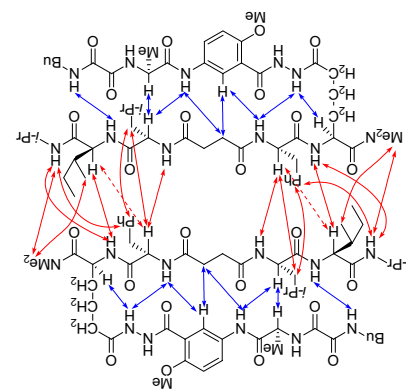

Spectroscopic DATA for the compound **1f**  
(4 mM, CDCl<sub>3</sub> 268K)

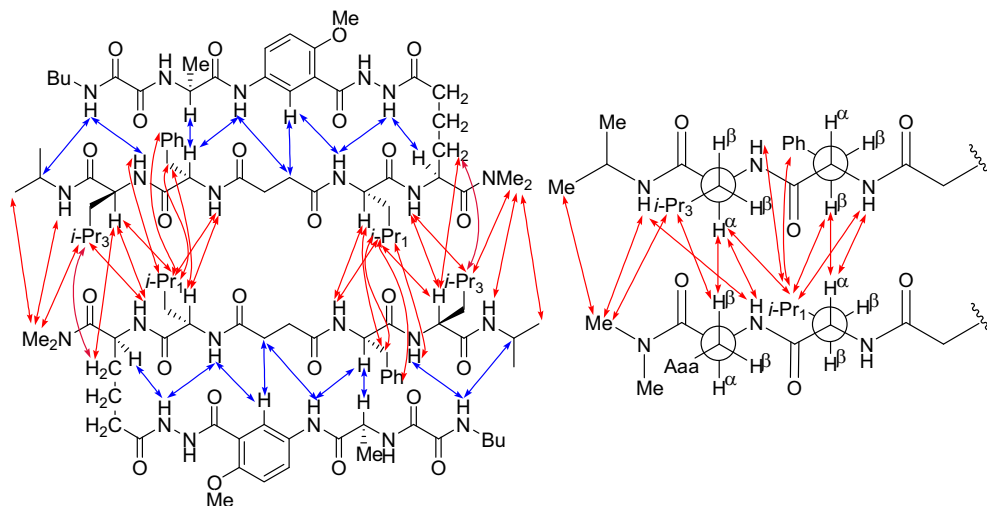

Key NOEs assigned as *intermolecular* are represented with red arrows.  
Key NOEs assigned as *intramolecular* are represented with blue arrows.

Key data for amino acids.

| Amino acid                        | H <sub>α</sub> Shift ppm | NH Shift ppm | <sup>3</sup> J <sub>NHα</sub> Hz |
|-----------------------------------|--------------------------|--------------|----------------------------------|
| Aaa                               | 5.18                     | 8.50         | 8.4                              |
| R <sub>1</sub> = Leu <sup>1</sup> | 5.60                     | 8.41         | 8.0                              |
| R <sub>2</sub> = Phe              | 5.13                     | 8.55         | 9.7                              |
| R <sub>3</sub> = Leu <sup>2</sup> | 5.07                     | 8.80         | 9.7                              |
| R <sub>4</sub> = Ala              | 4.60                     | 8.06         | overlap                          |

Amino adipic acid (Aaa) δ proton resonances.

*pro-R*: 2.94 ppm, t, (*overlap*)

*pro-S*: 2.18 ppm, td, (*J*<sub>1</sub> = 11.2 Hz; *J*<sub>2</sub> = 7.0 Hz)

anisotropy = 0.76ppm

Key data for other NH protons.

| Proton          | NH Shift ppm | <i>J</i> Hz |
|-----------------|--------------|-------------|
| Ar-NH           | 10.09        | -           |
| Hydrazide Ar    | 10.58        | 7.4         |
| Hydrazide Aaa   | 10.40        | 7.4         |
| Bu-NH           | 9.55         | broad       |
| <i>i</i> -Pr-NH | 8.06         | overlap     |

ESI MS *m/z* for C<sub>53</sub>H<sub>82</sub>N<sub>11</sub>O<sub>12</sub> [M+H]<sup>+</sup> calcd 1064.61, found 1064.48.



800 MHz <sup>1</sup>H NMR Spectrum of **1f** in CDCl<sub>3</sub>  
268 K (-5 °C), 4 mM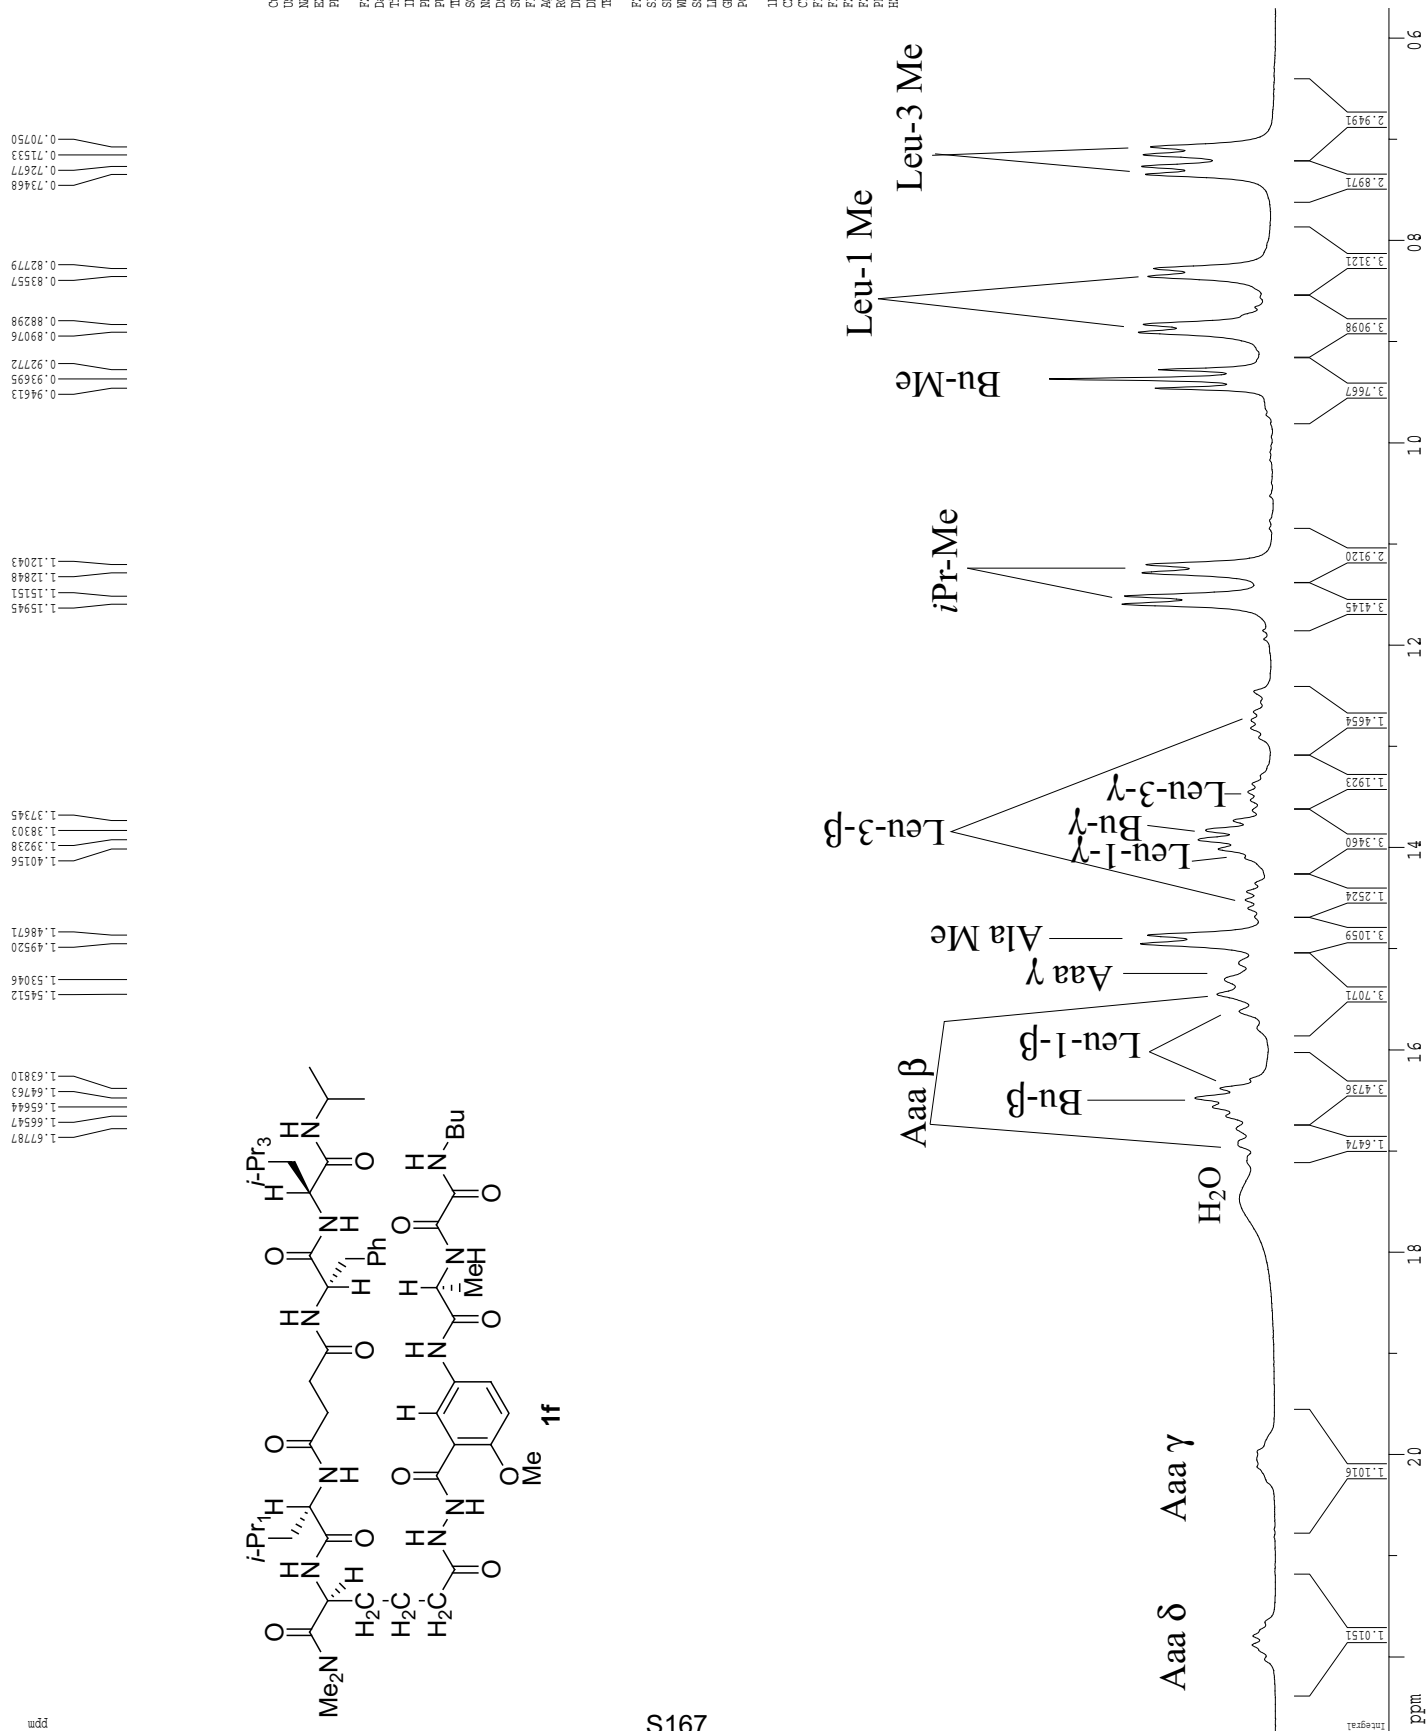

800 MHz <sup>1</sup>H NMR Spectrum of **1f** in CDCl<sub>3</sub>  
 268 K (-5 °C), 4 mM

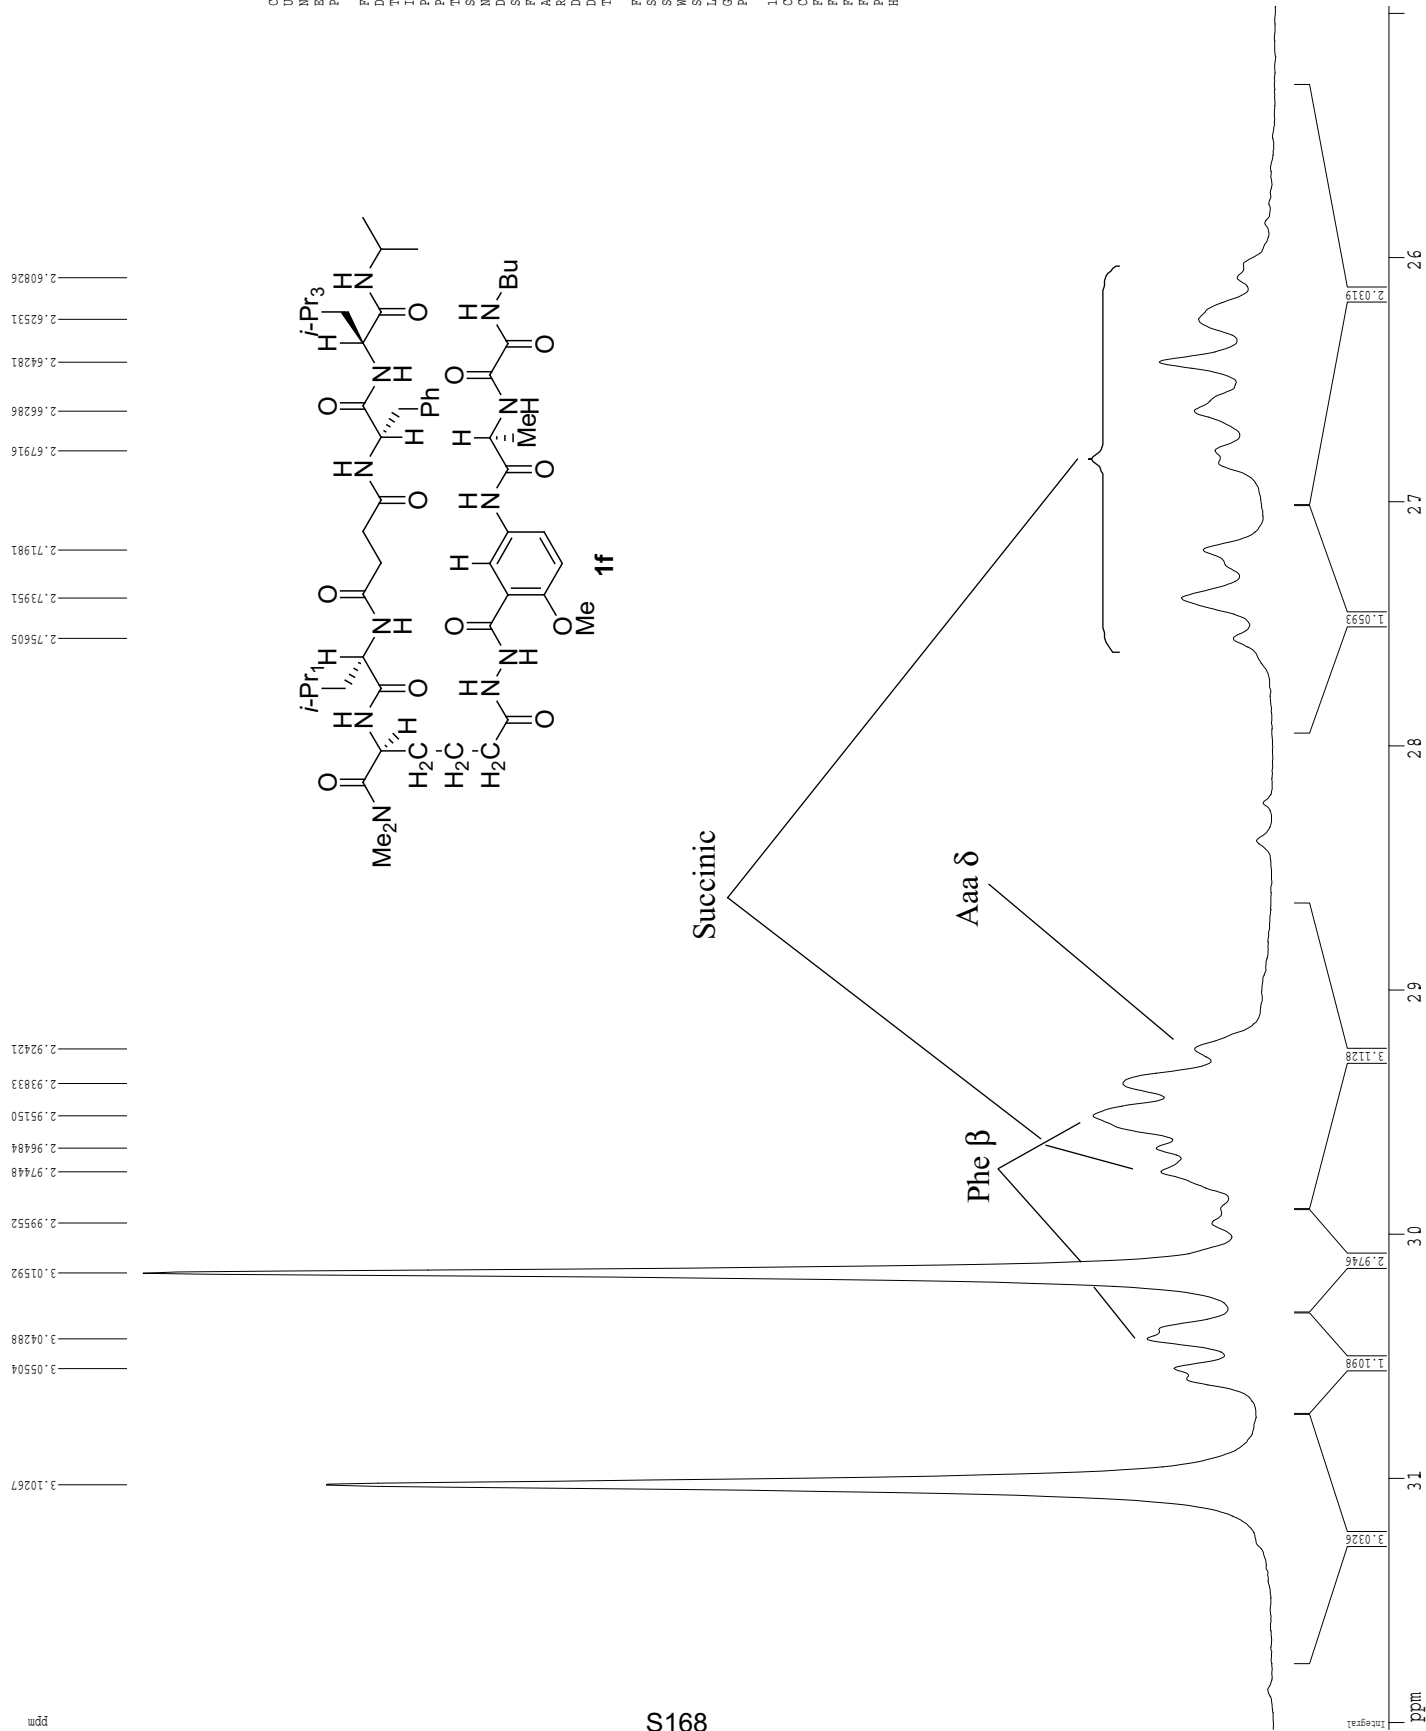

Current Data Parameters  
 USER slevin  
 NAME SL-7124-800-H  
 EXPNO 1  
 PROCNO 1  
 F2 - Acquisition Parameters  
 Date\_ 20061030  
 Time 0.00  
 INSTRUM varian  
 PROBRD 40:5mmbroadban  
 PULPROG zgpg30  
 AD 4392  
 SOLVENT cdcl3  
 NS 4  
 DS 4  
 SWH 11001.101 Hz  
 FIDRES 0.250070 Hz  
 AQ 1.9994864 sec  
 RG 81.92  
 DW 45.450 usec  
 DE 4.50 usec  
 TE 268.5 K  
 F2 - Processing parameter  
 SI 32768  
 SF 799.8064096 MHz  
 MDW EN  
 SSB 0  
 LB 1.00 Hz  
 GB 0  
 PC 2.00  
 1D NMR plot parameters  
 CX 22.80 cm  
 CY 15.00 cm  
 F1P 3.203 ppm  
 F1 2561.83 Hz  
 F2P 2.497 ppm  
 F2 1997.21 Hz  
 PPMCM 0.03096 ppm/cm  
 HZCM 24.76393 Hz/cm



Current Data Parameters  
 USER slevin  
 NAME SL-7-124-800-H  
 EXPNO 2  
 PROCNO 1

F2 - Acquisition Parameters  
 Date\_ 20061030  
 Time\_ 0.00  
 INSTRUM varian  
 PROBHD 40:5mmrbroadban  
 PULPROG gcosy  
 TD 4096  
 SOLVENT cdcl3  
 NS 16  
 DS 64  
 SWH 11001.101 Hz  
 FIDRES 2.685816 Hz  
 AQ 0.1843700 sec  
 RG 4096  
 DW 45.450 usec  
 DE 231.43 usec  
 TE 268.5 K

F1 - Acquisition parameters  
 ND0 1  
 TD 512  
 SFO1 799.8107 MHz  
 FIDRES 21.486525 Hz  
 SW 13.755 ppm  
 FhMODE undefined

F2 - Processing parameters  
 SI 4096  
 SF 799.8064116 MHz  
 WDW SINE  
 SSB 0  
 LB 0.00 Hz  
 GB 0  
 PC 1.40

F1 - Processing parameters  
 SI 512  
 MC2 QF  
 SF 799.8064116 MHz  
 WDW SINE  
 SSB 0  
 LB 0.00 Hz  
 GB 0

2D NMR plot parameters  
 CX2 15.00 cm  
 CX1 15.00 cm  
 F2PLO 11.002 ppm  
 F2LO 8799.72 Hz  
 F2PHI -0.103 ppm  
 F2HI -82.27 Hz  
 F1PLO 11.022 ppm  
 F1LO 8815.84 Hz  
 F1PHI -0.126 ppm  
 F1HI -101.07 Hz  
 F2PPMCM 0.74035 ppm/cm  
 F2ZCM 592.13275 Hz/cm  
 F1PPMCM 0.74326 ppm/cm  
 F1ZCM 594.46051 Hz/cm

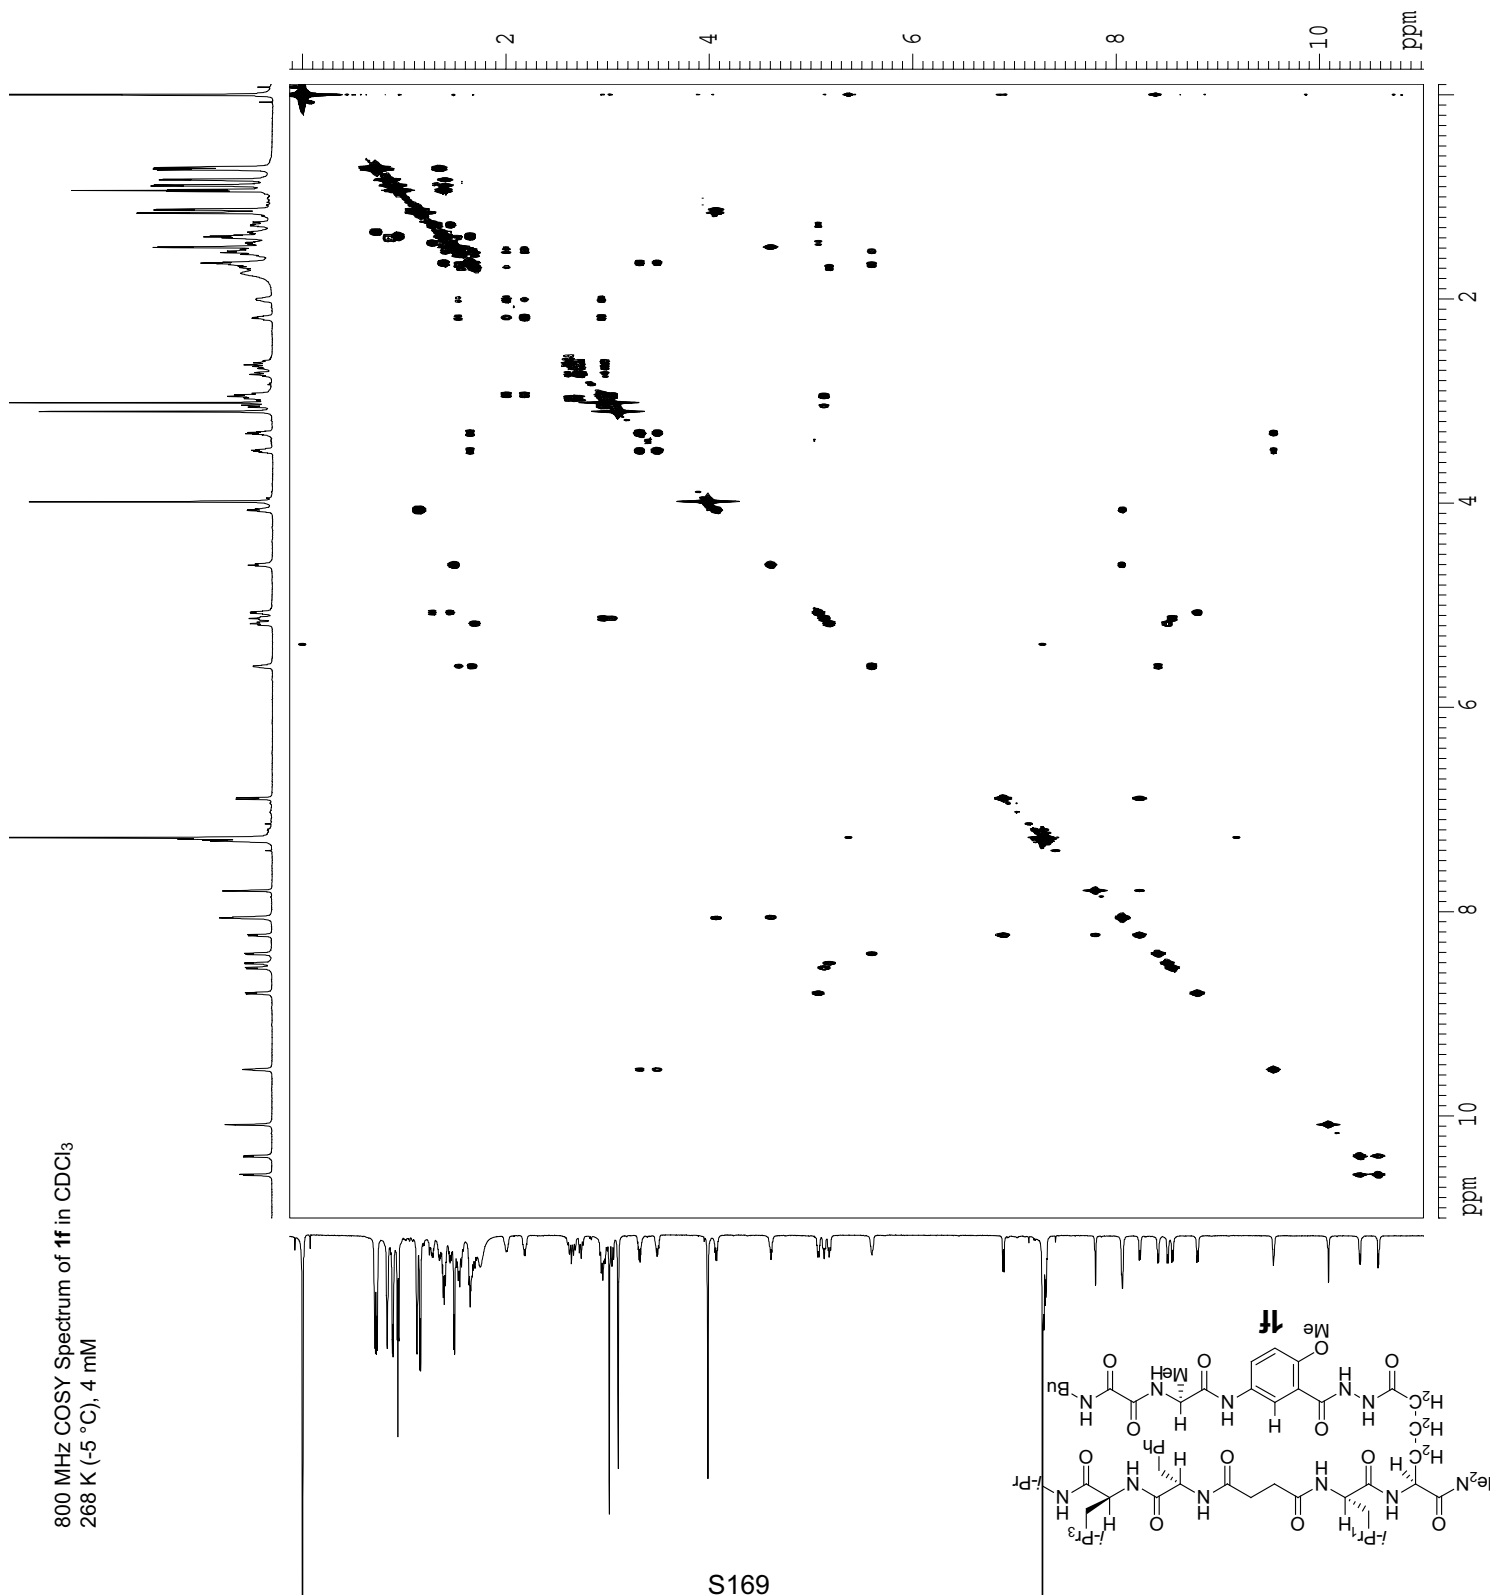

Current Data Parameters  
 USER slevin  
 NAME SJ-7-124-800-H  
 EXPNO 2  
 PROCNO 1

## F2 - Acquisition Parameters

Date\_ 20061030  
 Time 0.00  
 INSTRUM varian  
 PROBHD 40.5mmroadban  
 PULPROG gcosy  
 TD 4096  
 SOLVENT cdcl3  
 NS 16  
 DS 64  
 SWH 11001.101 Hz  
 FIDRES 2.685816 Hz  
 AQ 0.1843700 sec  
 RG 4096  
 DW 45.450 usec  
 DE 231.43 usec  
 TE 268.5 K

## F1 - Acquisition parameters

ND0 1  
 TD 512  
 SF01 799.8107 MHz  
 FIDRES 21.486525 Hz  
 SW 13.755 ppm  
 F1MODE undefined

## F2 - Processing parameters

SI 4096  
 SF 799.8064116 MHz  
 WDW SINE  
 SSB 0  
 LB 0.00 Hz  
 GB 0  
 PC 1.40

## F1 - Processing parameters

SI 512  
 MC2 QF  
 SF 799.8064116 MHz  
 WDW SINE  
 SSB 0  
 LB 0.00 Hz  
 GB 0

## 2D NMR plot parameters

CX2 15.00 cm  
 CX1 15.00 cm  
 F2PLO 5.500 ppm  
 F2LO 4398.94 Hz  
 F2PHI -0.100 ppm  
 F2HI -79.98 Hz  
 F1PLO 5.500 ppm  
 F1LO 4398.94 Hz  
 F1PHI -0.100 ppm  
 F1HI -79.98 Hz  
 F2PPMCM 0.37333 ppm/cm  
 F2HZCM 298.59439 Hz/cm  
 F1PPMCM 0.37333 ppm/cm  
 F1HZCM 298.59439 Hz/cm

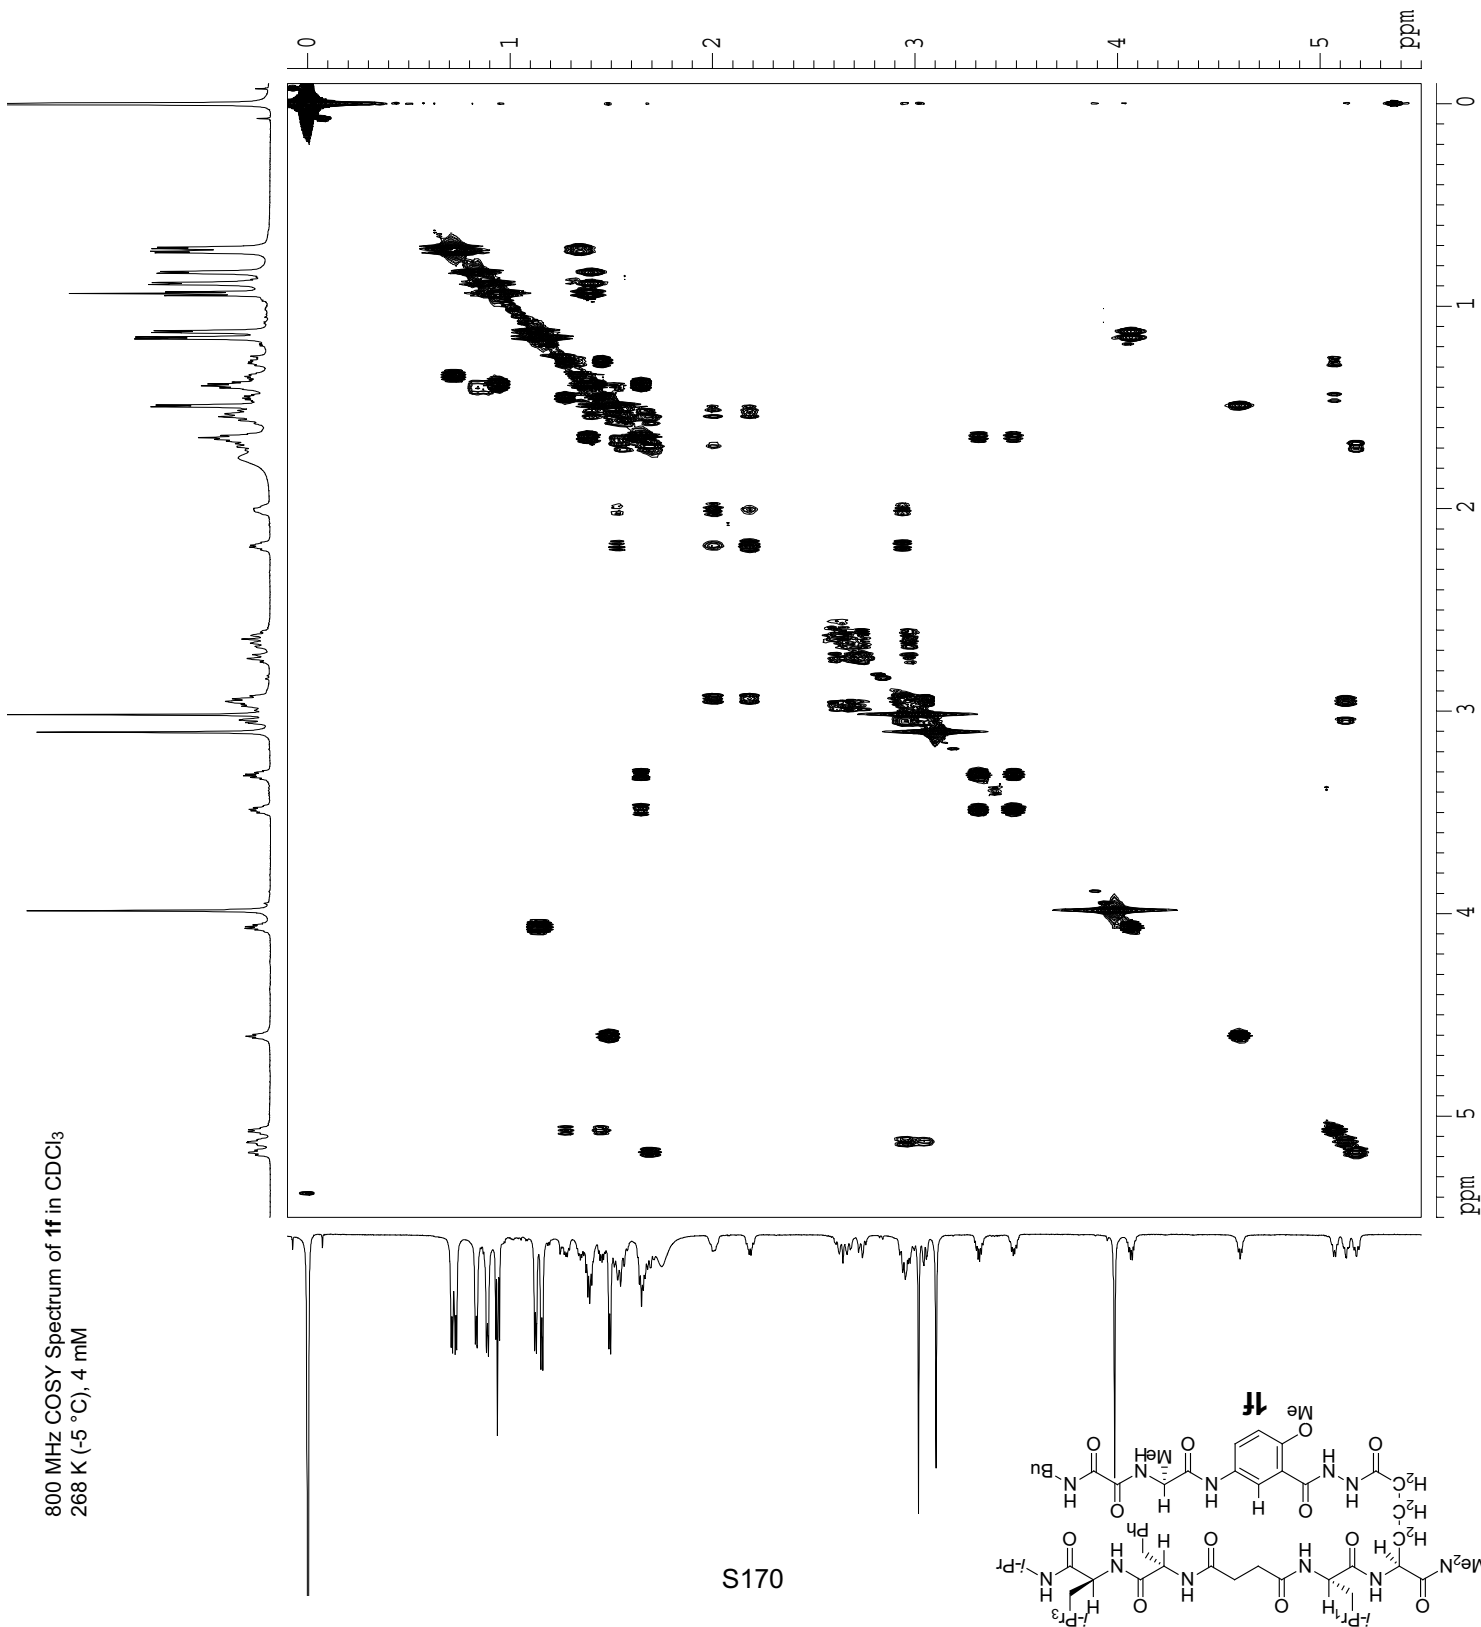

Supporting Information

S. Levin and J. S. Nowick

Current Data Parameters  
 USER slevin  
 NAME SL-7-124-800-H  
 EXPNO 2  
 PROCNO 1

F2 - Acquisition Parameters

Date\_ 20061030  
 Time\_ 0.00  
 INSTRUM varian  
 PROBHD 40:5mmrbroadban  
 PULPROG gcosy  
 TD 4096  
 SOLVENT cdcl3  
 NS 16  
 DS 64  
 SWH 11001.101 Hz  
 FIDRES 2.685816 Hz  
 AQ 0.1843700 sec  
 RG 4096  
 DW 45.450 usec  
 DE 231.43 usec  
 TE 268.5 K

F1 - Acquisition Parameters

ND0 1  
 TD 512  
 SFO1 799.8107 MHz  
 FIDRES 21.486525 Hz  
 SW 13.755 ppm  
 FTMODE undefined

F2 - Processing parameters

SI 4096  
 SF 799.8064116 MHz  
 WDW SINE  
 SSB 0  
 LB 0.00 Hz  
 GB 0  
 PC 1.40

F1 - Processing parameters

SI 512  
 MC2 QF  
 SF 799.8064116 MHz  
 WDW SINE  
 SSB 0  
 LB 0.00 Hz  
 GB 0

2D NMR plot parameters

CX2 15.00 cm  
 CX1 15.00 cm  
 F2PLO 11.000 ppm  
 F2LO 8797.87 Hz  
 F2PHI 5.500 ppm  
 F2HI 4398.94 Hz  
 F1PLO 5.515 ppm  
 F1LO 4411.10 Hz  
 F1PHI -0.126 ppm  
 F1HI -101.07 Hz  
 F2PFCM 0.36667 ppm/cm  
 F2HZCM 293.26236 Hz/cm  
 F1PFCM 0.37611 ppm/cm  
 F1HZCM 300.81134 Hz/cm

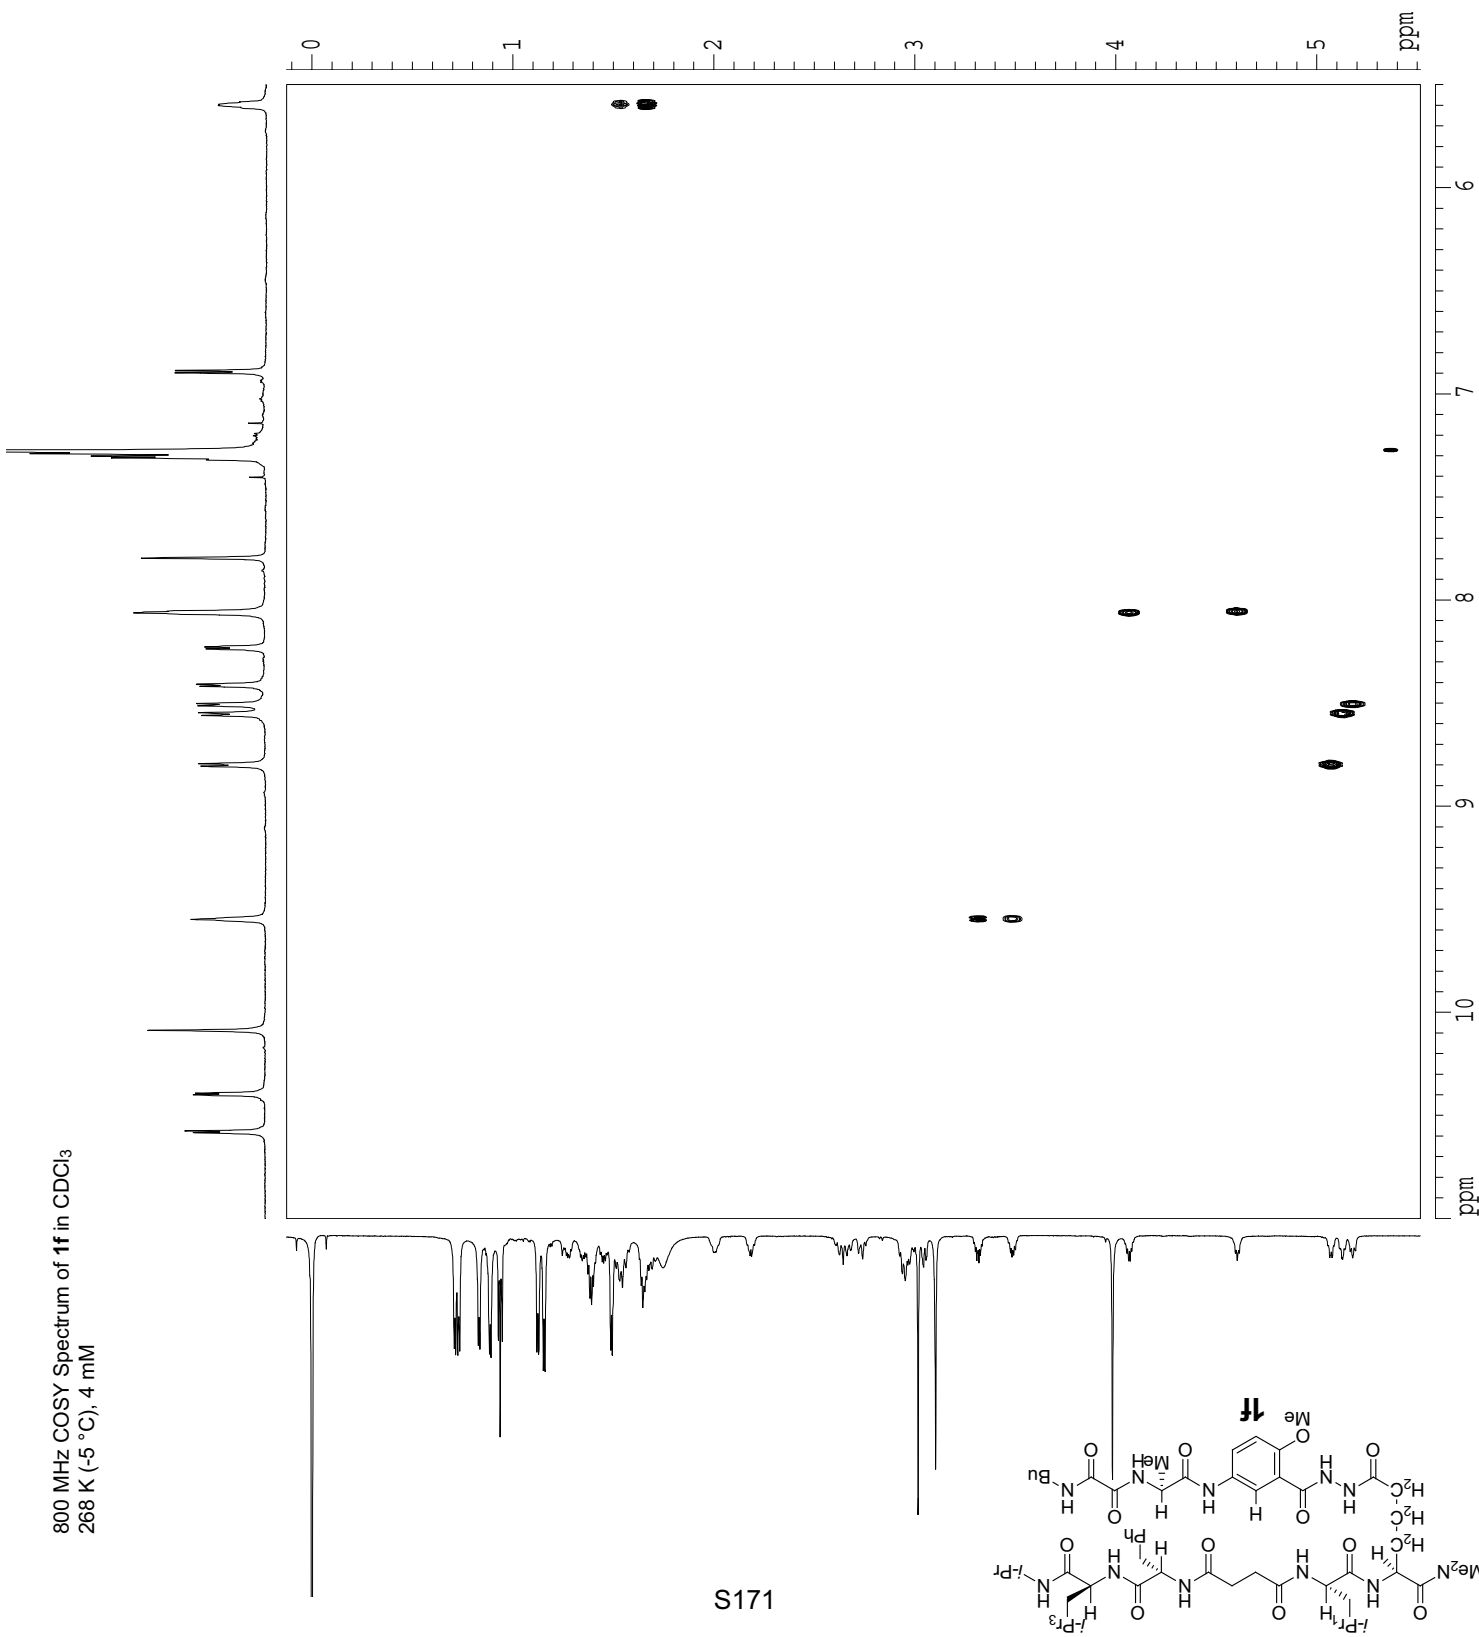

Supporting Information

Current Data Parameters  
 USER slevin  
 NAME SL-7-124-800-H  
 EXPNO 2  
 PROCNO 1

F2 - Acquisition Parameters

Date\_ 20061030  
 Time 0.00  
 INSTRUM varian  
 PROBHD 40:5mmroadban  
 PULPROG gcosy  
 TD 4096  
 SOLVENT cdc13  
 NS 16  
 DS 64  
 SWH 11001.101 Hz  
 FIDRES 2.685816 Hz  
 AQ 0.1843700 sec  
 RG 4096  
 DW 45.450 usec  
 DE 231.43 usec  
 TE 268.5 K

F1 - Acquisition Parameters

ND0 1  
 TD 512  
 SF01 799.8107 MHz  
 FIDRES 21.486525 Hz  
 SW 13.755 ppm  
 F1MODE undefined

F2 - Processing parameters

SI 4096  
 SF 799.8064116 MHz  
 WDW SINE  
 SSB 0  
 LB 0.00 Hz  
 GB 0  
 PC 1.40

F1 - Processing parameters

SI 512  
 MC2 QF  
 SF 799.8064116 MHz  
 WDW SINE  
 SSB 0  
 LB 0.00 Hz  
 GB 0

S. Levin and J. S. Nowick

2D NMR plot parameters

CX2 15.00 cm  
 CX1 15.00 cm  
 F2PLO 11.002 ppm  
 F2LO 8799.72 Hz  
 F2PHI 5.498 ppm  
 F2HI 4397.67 Hz  
 F1PLO 11.000 ppm  
 F1LO 8797.87 Hz  
 F1PHI 5.500 ppm  
 F1HI 4398.94 Hz  
 F2PDMCM 0.36693 ppm/cm  
 F2HZCM 293.47009 Hz/cm  
 F1PDMCM 0.36667 ppm/cm  
 F1HZCM 293.26236 Hz/cm

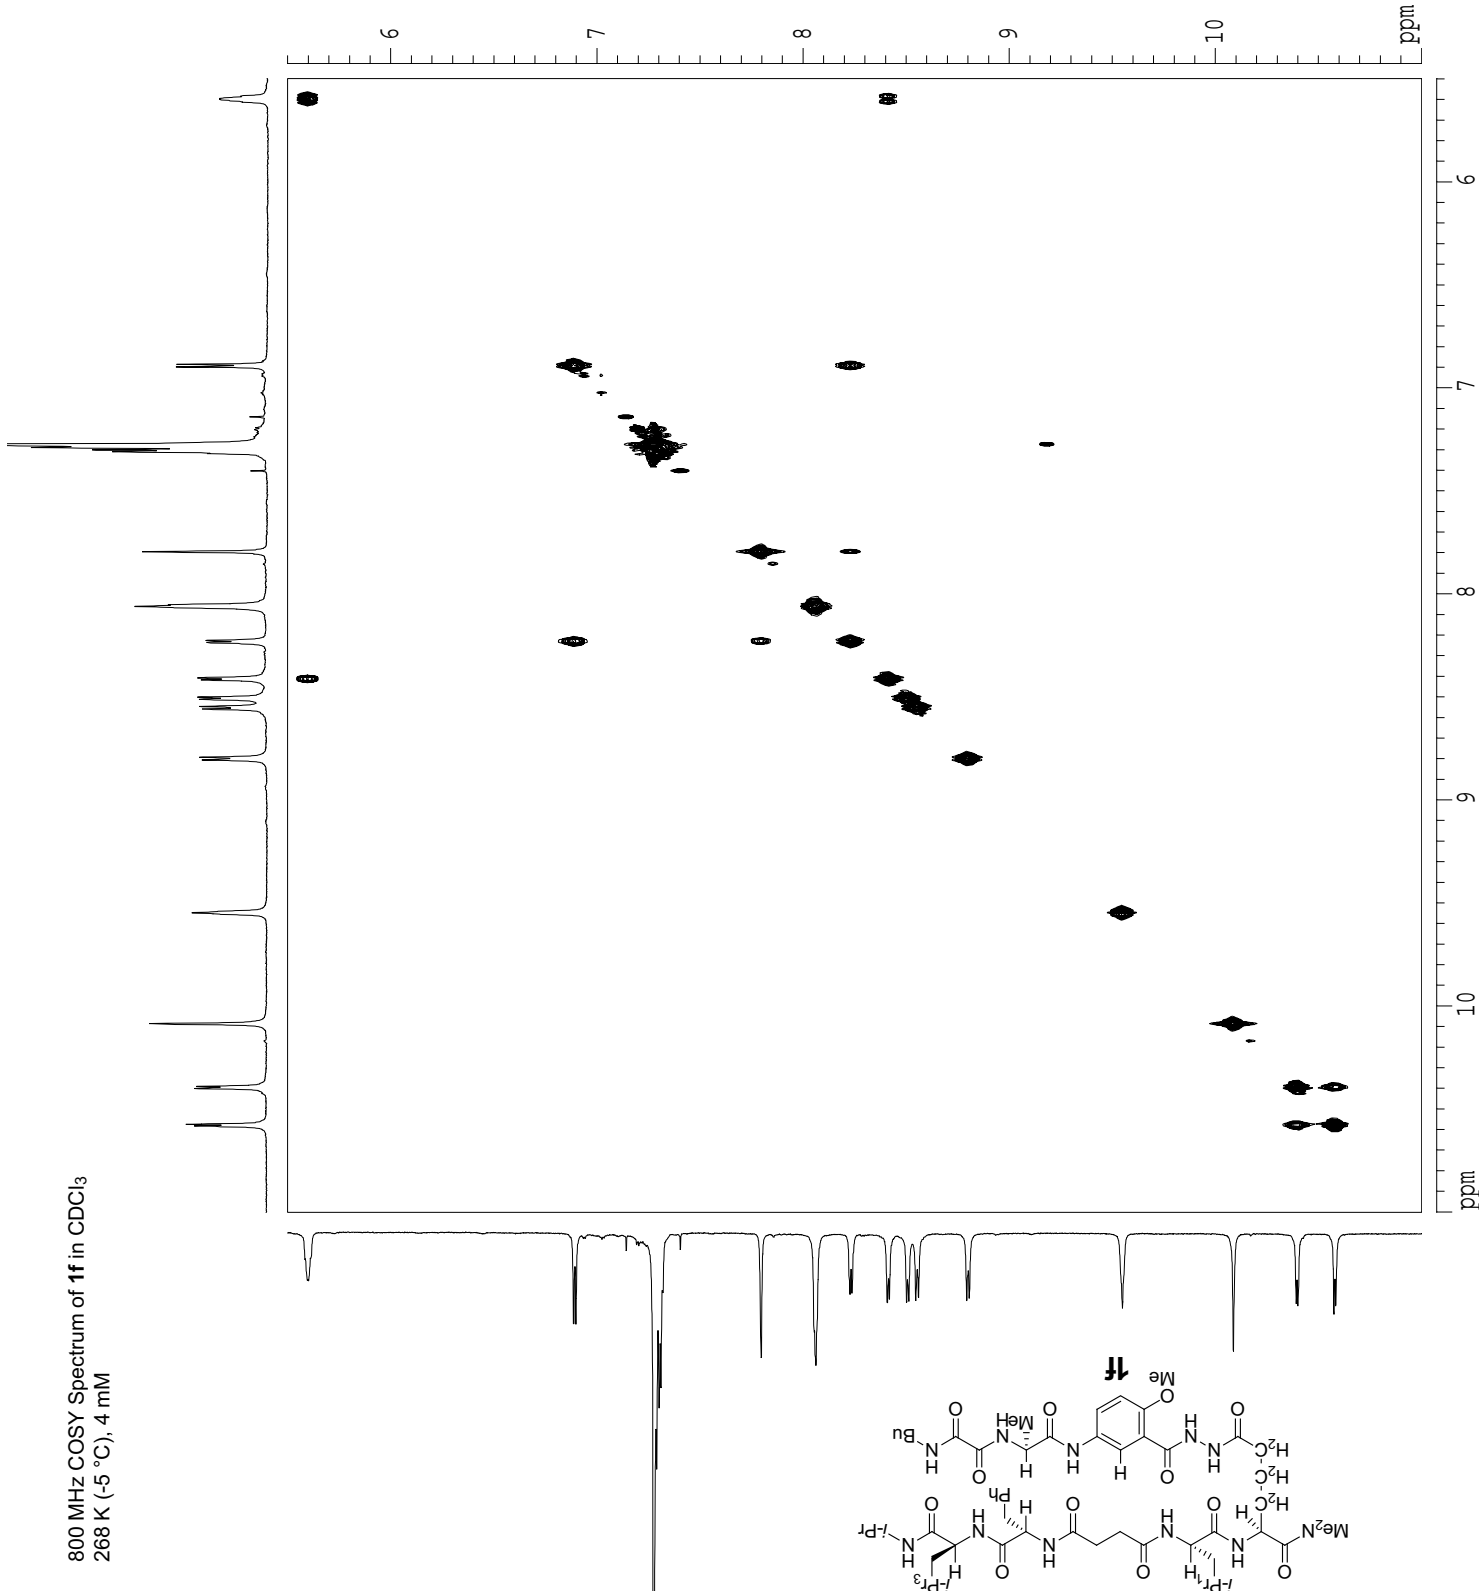

# Supporting Information

Current Data Parameters  
 USER slevin  
 NAME SL-7-124-800-H  
 EXPNO 2  
 PROCNO 1

## F2 - Acquisition Parameters

Date 20061030  
 Time 0.00  
 INSTRUM varian  
 PROBHD 40:5mm broadband  
 PULPROG gcosy  
 TD 4096  
 SOLVENT cdcl3  
 NS 16  
 DS 64  
 SWH 11001.101 Hz  
 FIDRES 2.685816 Hz  
 AQ 0.1843700 sec  
 RG 4096  
 DW 45.450 usec  
 DE 231.43 usec  
 TE 268.5 K

## F1 - Acquisition parameters

ND0 1  
 TD 512  
 SFO1 799.8107 MHz  
 FIDRES 21.486525 Hz  
 SW 13.755 ppm  
 FMODE undefined

## F2 - Processing parameters

SI 4096  
 SF 799.8064116 MHz  
 WDW SINE  
 SSB 0  
 LB 0.00 Hz  
 GB 0  
 PC 1.40

## F1 - Processing parameters

SI 512  
 MC2 OF  
 SF 799.8064116 MHz  
 WDW SINE  
 SSB 0  
 LB 0.00 Hz  
 GB 0

S. Levin and J. S. Nowick

## 2D NMR plot parameters

CX2 15.00 cm  
 CX1 15.00 cm  
 F2PLO 5.500 ppm  
 F2LO 4398.94 Hz  
 F2PHI -0.100 ppm  
 F2HI -79.98 Hz  
 F1PLO 11.022 ppm  
 F1LO 8815.84 Hz  
 F1PHI 5.488 ppm  
 F1HI 4389.61 Hz  
 F2PPMCM 0.37333 ppm/cm  
 F2HZCM 298.59439 Hz/cm  
 F1PPMCM 0.36894 ppm/cm  
 F1HZCM 295.08160 Hz/cm

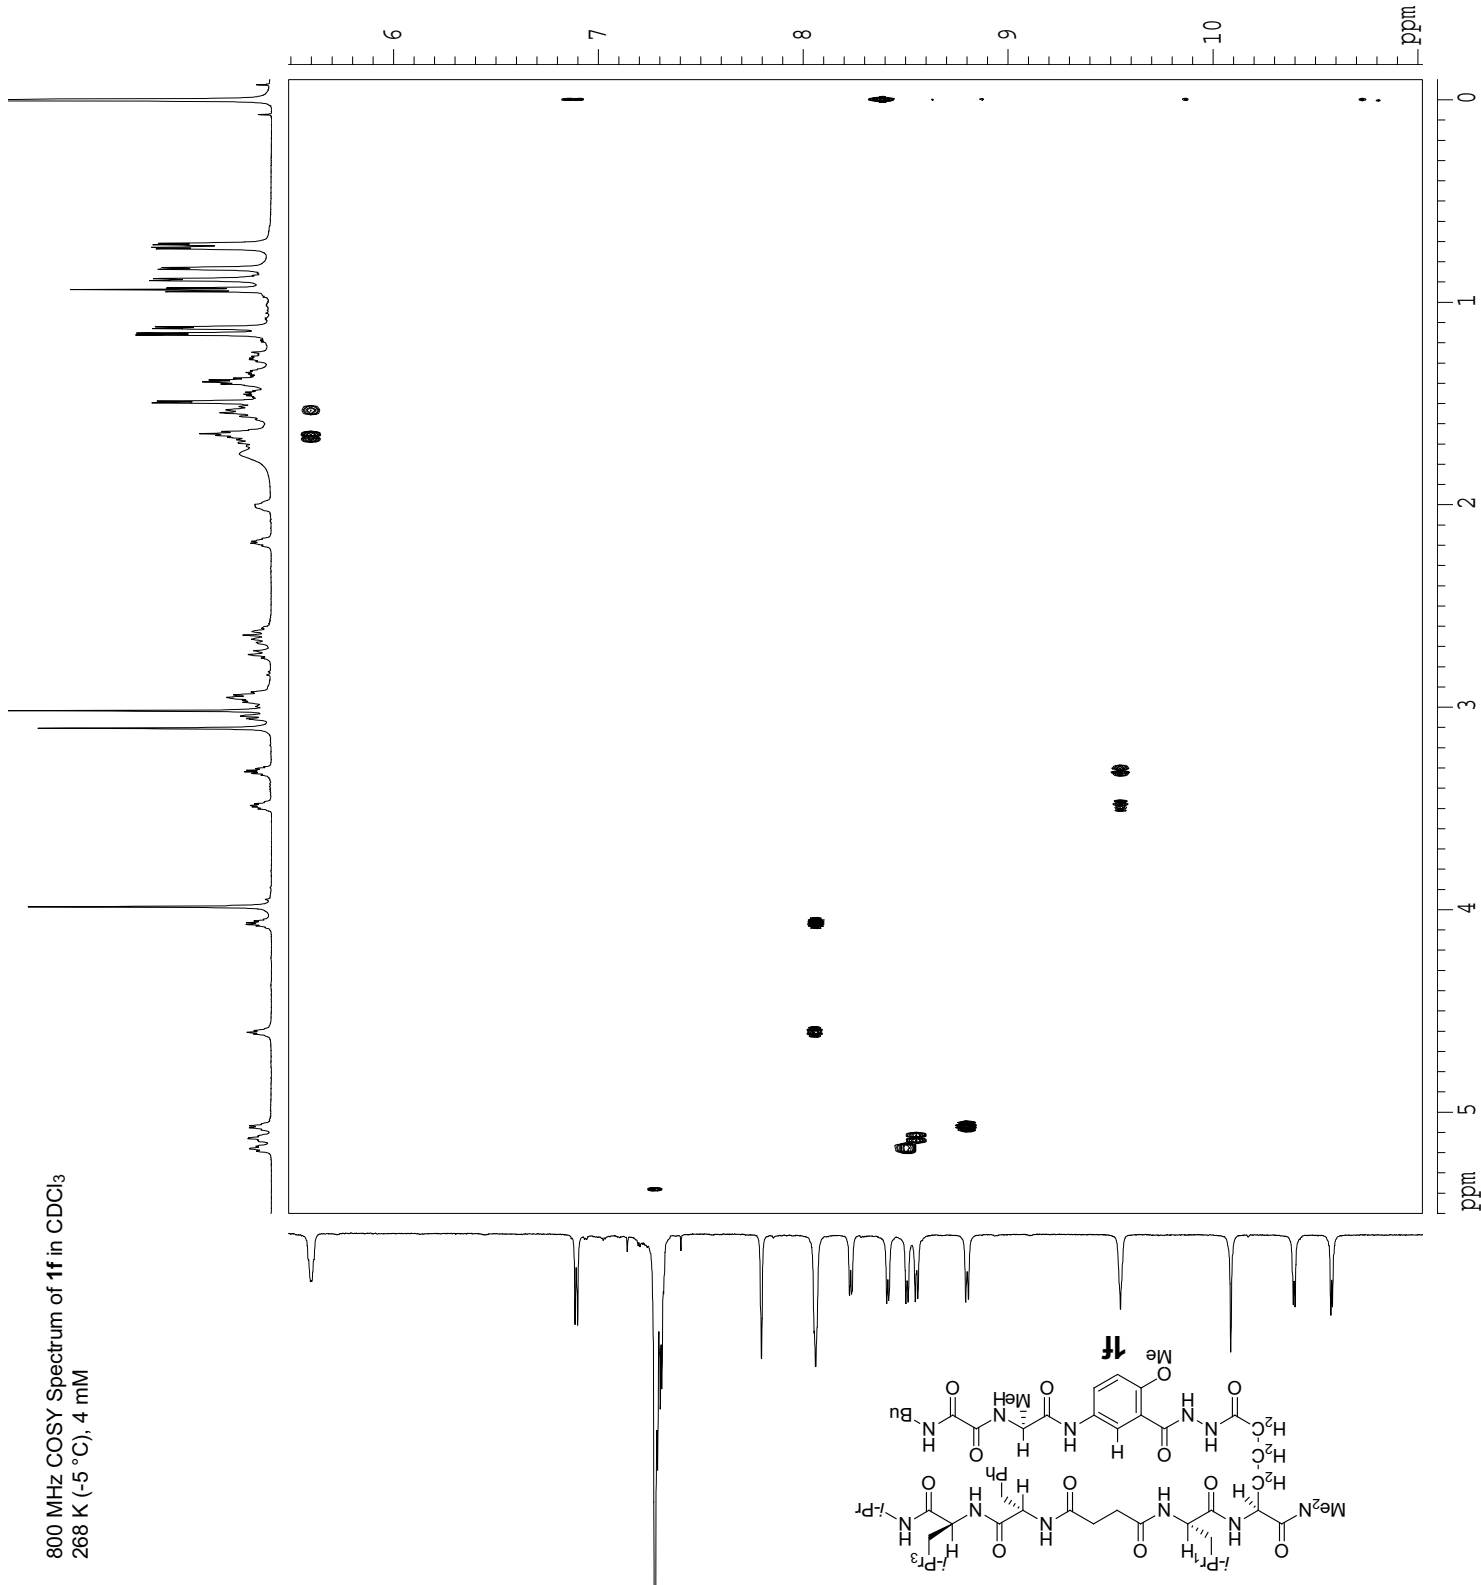

Supporting Information

Current Data Parameters  
 USER slevin  
 NAME SL-7-124-800-H  
 EXPNO 2  
 PROCNO 1

F2 - Acquisition Parameters

Date 20061030  
 Time 0.00  
 INSTRUM varian  
 PROBHD 40:5mm broadband  
 PULPROG gcosy  
 TD 4096  
 SOLVENT cdcl3  
 NS 16  
 DS 64  
 SWH 11001.101 Hz  
 FIDRES 2.685816 Hz  
 AQ 0.1843700 sec  
 RG 4096  
 DW 45.450 usec  
 DE 231.43 usec  
 TE 268.5 K

F1 - Acquisition Parameters

ND0 1  
 TD 512  
 SF01 799.8107 MHz  
 FIDRES 21.486525 Hz  
 SW 13.755 ppm  
 FmMODE undefined

F2 - Processing Parameters

SI 4096  
 SF 799.8064116 MHz  
 WDW SINE  
 SSB 0  
 LB 0.00 Hz  
 GB 0  
 PC 1.40

F1 - Processing Parameters

SI 512  
 MC2 QF  
 SF 799.8064116 MHz  
 WDW SINE  
 SSB 0  
 LB 0.00 Hz  
 GB 0

S. Levin and J. S. Nowick

2D NMR plot parameters  
 CX2 15.00 cm  
 CX1 15.00 cm  
 F2PLO 2.250 ppm  
 F2LO 1799.56 Hz  
 F2PHI 0.500 ppm  
 F2HI 399.90 Hz  
 F1PLO 2.250 ppm  
 F1LO 1799.56 Hz  
 F1PHI 0.500 ppm  
 F1HI 399.90 Hz  
 F2PFCM 0.11667 Hz/cm  
 F2HZCM 93.31075 Hz/cm  
 F1PFCM 0.11667 Hz/cm  
 F1HZCM 93.31075 Hz/cm

800 MHz COSY Spectrum of **1f** in CDCl<sub>3</sub>  
 268 K (-5 °C), 4 mM

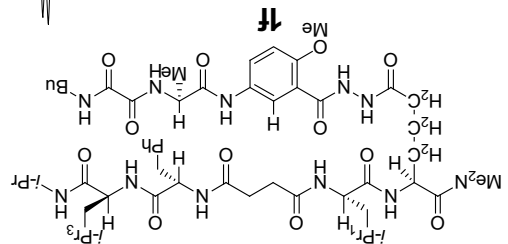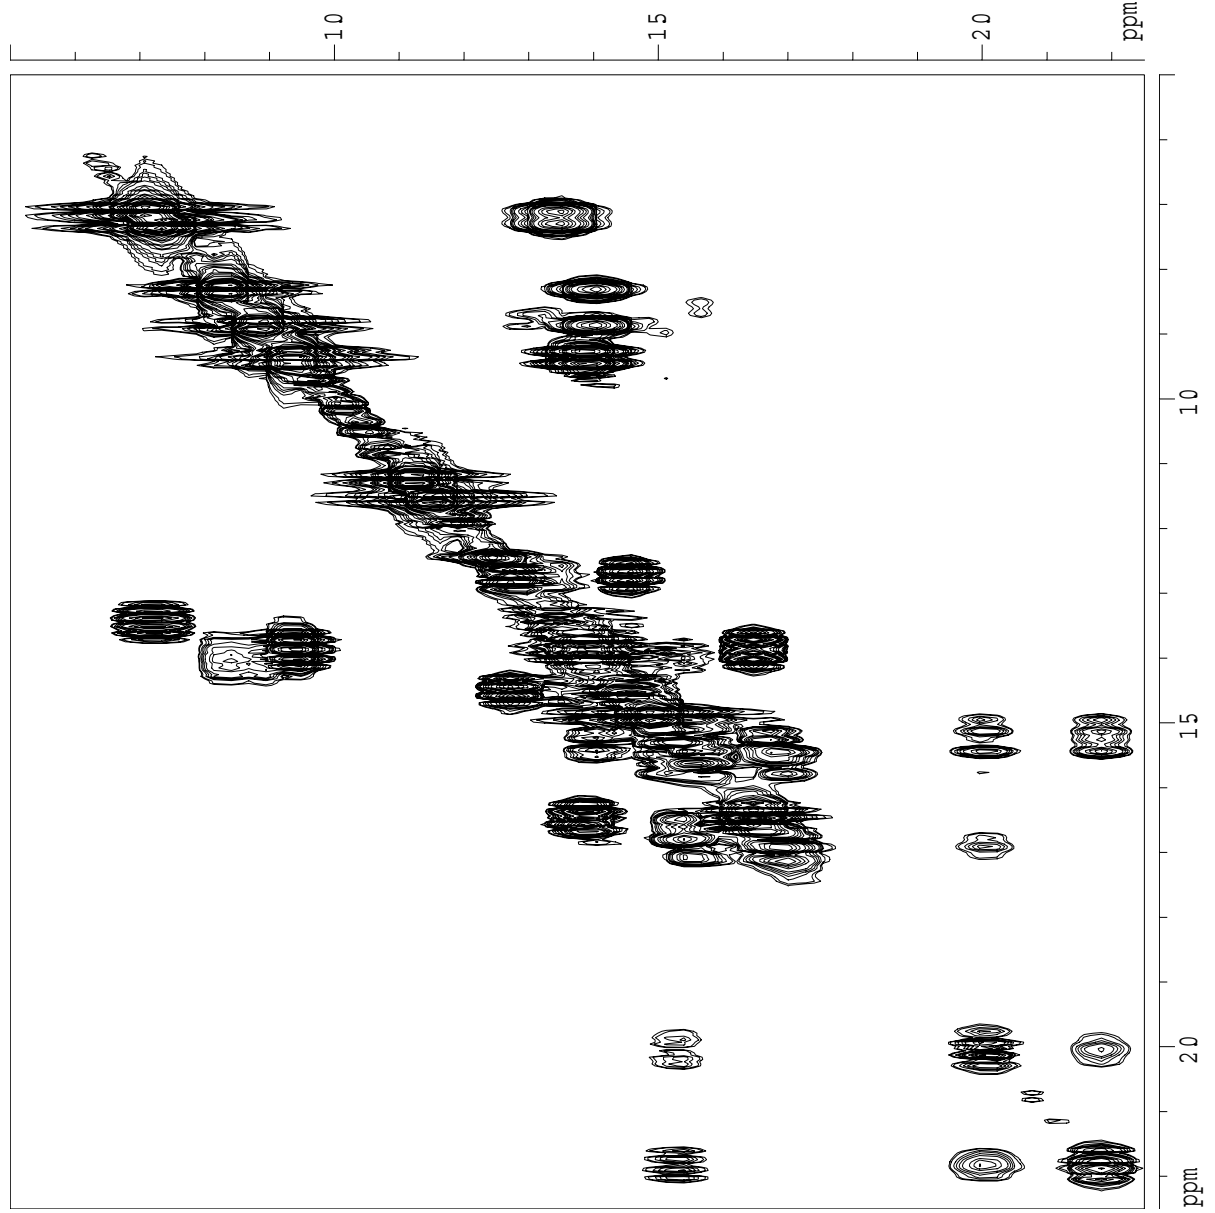

Supporting Information

Current Data Parameters  
 USER slewin  
 NAME SL-7-124-800-H  
 EXPNO 2  
 PROCNO 1

F2 - Acquisition Parameters  
 Date\_ 20061030  
 Time 0.00  
 INSTRUM varian  
 PROBHD 40:5mm broadband  
 PULPROG gcosy  
 TD 4096  
 SOLVENT cdcl3  
 NS 16  
 DS 64  
 SWH 11001.101 Hz  
 FIDRES 2.685816 Hz  
 AQ 0.1843700 sec  
 RG 4096  
 DW 45.450 usec  
 DE 231.43 usec  
 TE 268.5 K

F1 - Acquisition parameters  
 NDO 1  
 TD 512  
 SFO1 799.8107 MHz  
 FIDRES 21.486525 Hz  
 SW 13.755 ppm  
 FwMODE undefined

F2 - Processing parameters  
 SI 4096  
 SF 799.8064116 MHz  
 WDW SINE  
 SSB 0  
 LB 0.00 Hz  
 GB 0  
 PC 1.40

F1 - Processing parameters  
 SI 512  
 MC2 QF  
 SF 799.8064116 MHz  
 WDW SINE  
 SSB 0  
 LB 0.00 Hz  
 GB 0

S. Levin and J. S. Nowick

2D NMR plot parameters  
 CX2 15.00 cm  
 CX1 15.00 cm  
 F2PLO 3.641 ppm  
 F2LO 2912.42 Hz  
 F2PHI 1.892 ppm  
 F2HI 1513.11 Hz  
 F1PLO 5.193 ppm  
 F1LO 4153.26 Hz  
 F1PHI 1.378 ppm  
 F1HI 1102.18 Hz  
 F2PPMCM 0.11664 ppm/cm  
 FHZCM 93.28732 Hz/cm  
 F1PPMCM 0.25432 ppm/cm  
 F1HZCM 203.40576 Hz/cm

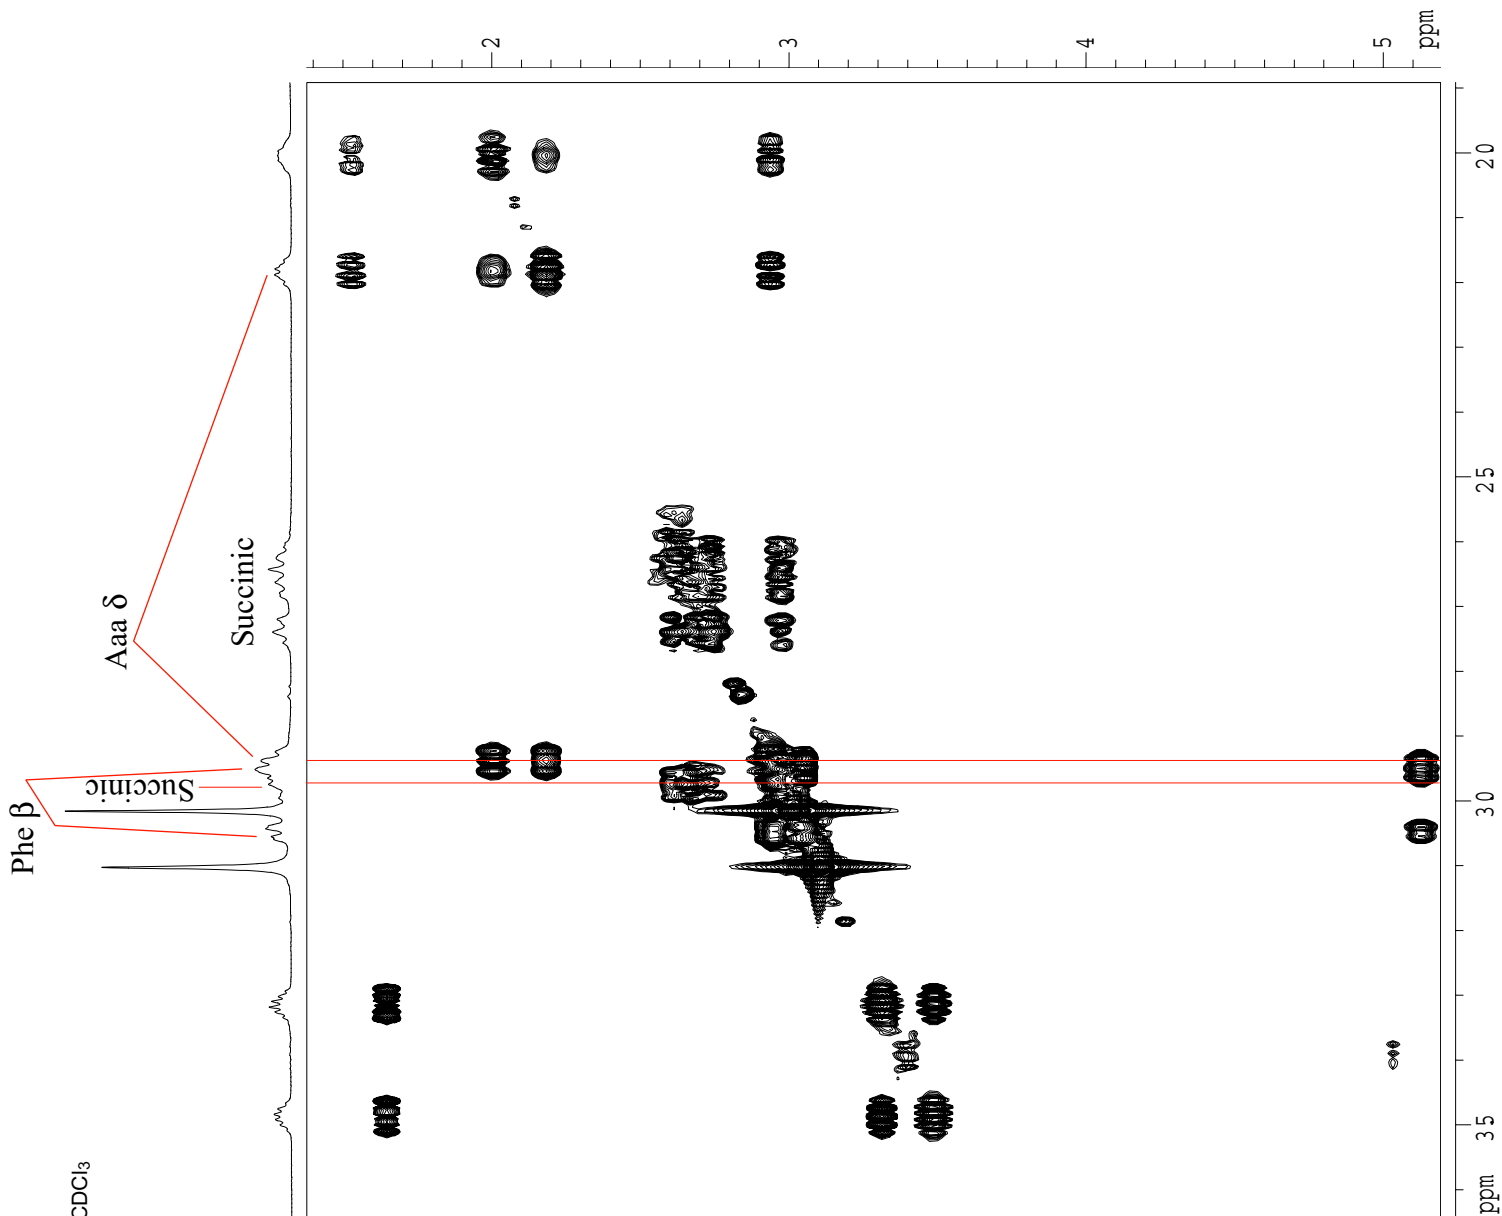

800 MHz COSY Spectrum of **1f** in CDCl<sub>3</sub>  
 268 K (-5 °C), 4 mM

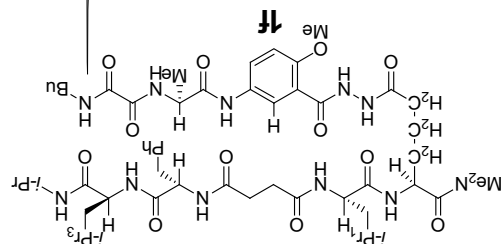

Supporting Information

S. Levin and J. S. Nowick

Current Data Parameters  
 USER slevin  
 NAME SL-7-124-800-H  
 EXPNO 3  
 PROCNO 1

F2 - Acquisition Parameters

Date\_ 20061030  
 Time 0.00  
 INSTRUM varian  
 PROBHD 40:5mmroadban  
 PULPROG wgtocsy\_bt  
 TD 4096  
 SOLVENT CDCl3  
 NS 32  
 DS 64  
 SWH 11001.101 Hz  
 FIDRES 2.685816 Hz  
 AQ 0.1862132 sec  
 RG 287.4  
 DW 45.450 usec  
 DE 6.00 usec  
 TE 268.5 K

F1 - Acquisition parameters

ND0 1  
 TD 256  
 SF01 799.8107 MHz  
 FIDRES 42.973049 Hz  
 SW 13.755 ppm  
 F1MODE undefined

F2 - Processing parameters

SI 2048  
 SF 799.8064116 MHz  
 WDW QSI  
 SSB 2  
 LB 0.00 Hz  
 GB 0  
 PC 1.40

F1 - Processing parameters

SI 1024  
 MC2 States  
 SF 799.8064116 MHz  
 WDW QSI  
 SSB 2  
 LB 0.00 Hz  
 GB 0

2D NMR plot parameters

CX2 15.00 cm  
 CX1 15.00 cm  
 F2PLO 11.000 ppm  
 F2LO 8797.87 Hz  
 F2PHI -0.100 ppm  
 F2HI -79.98 Hz  
 F1PLO 11.000 ppm  
 F1LO 8797.87 Hz  
 F1PHI -0.100 ppm  
 F1HI -79.98 Hz  
 F2PPMCM 0.74000 ppm/cm  
 F2HZCM 591.85669 Hz/cm  
 F1PPMCM 0.74000 ppm/cm  
 F1HZCM 591.85669 Hz/cm

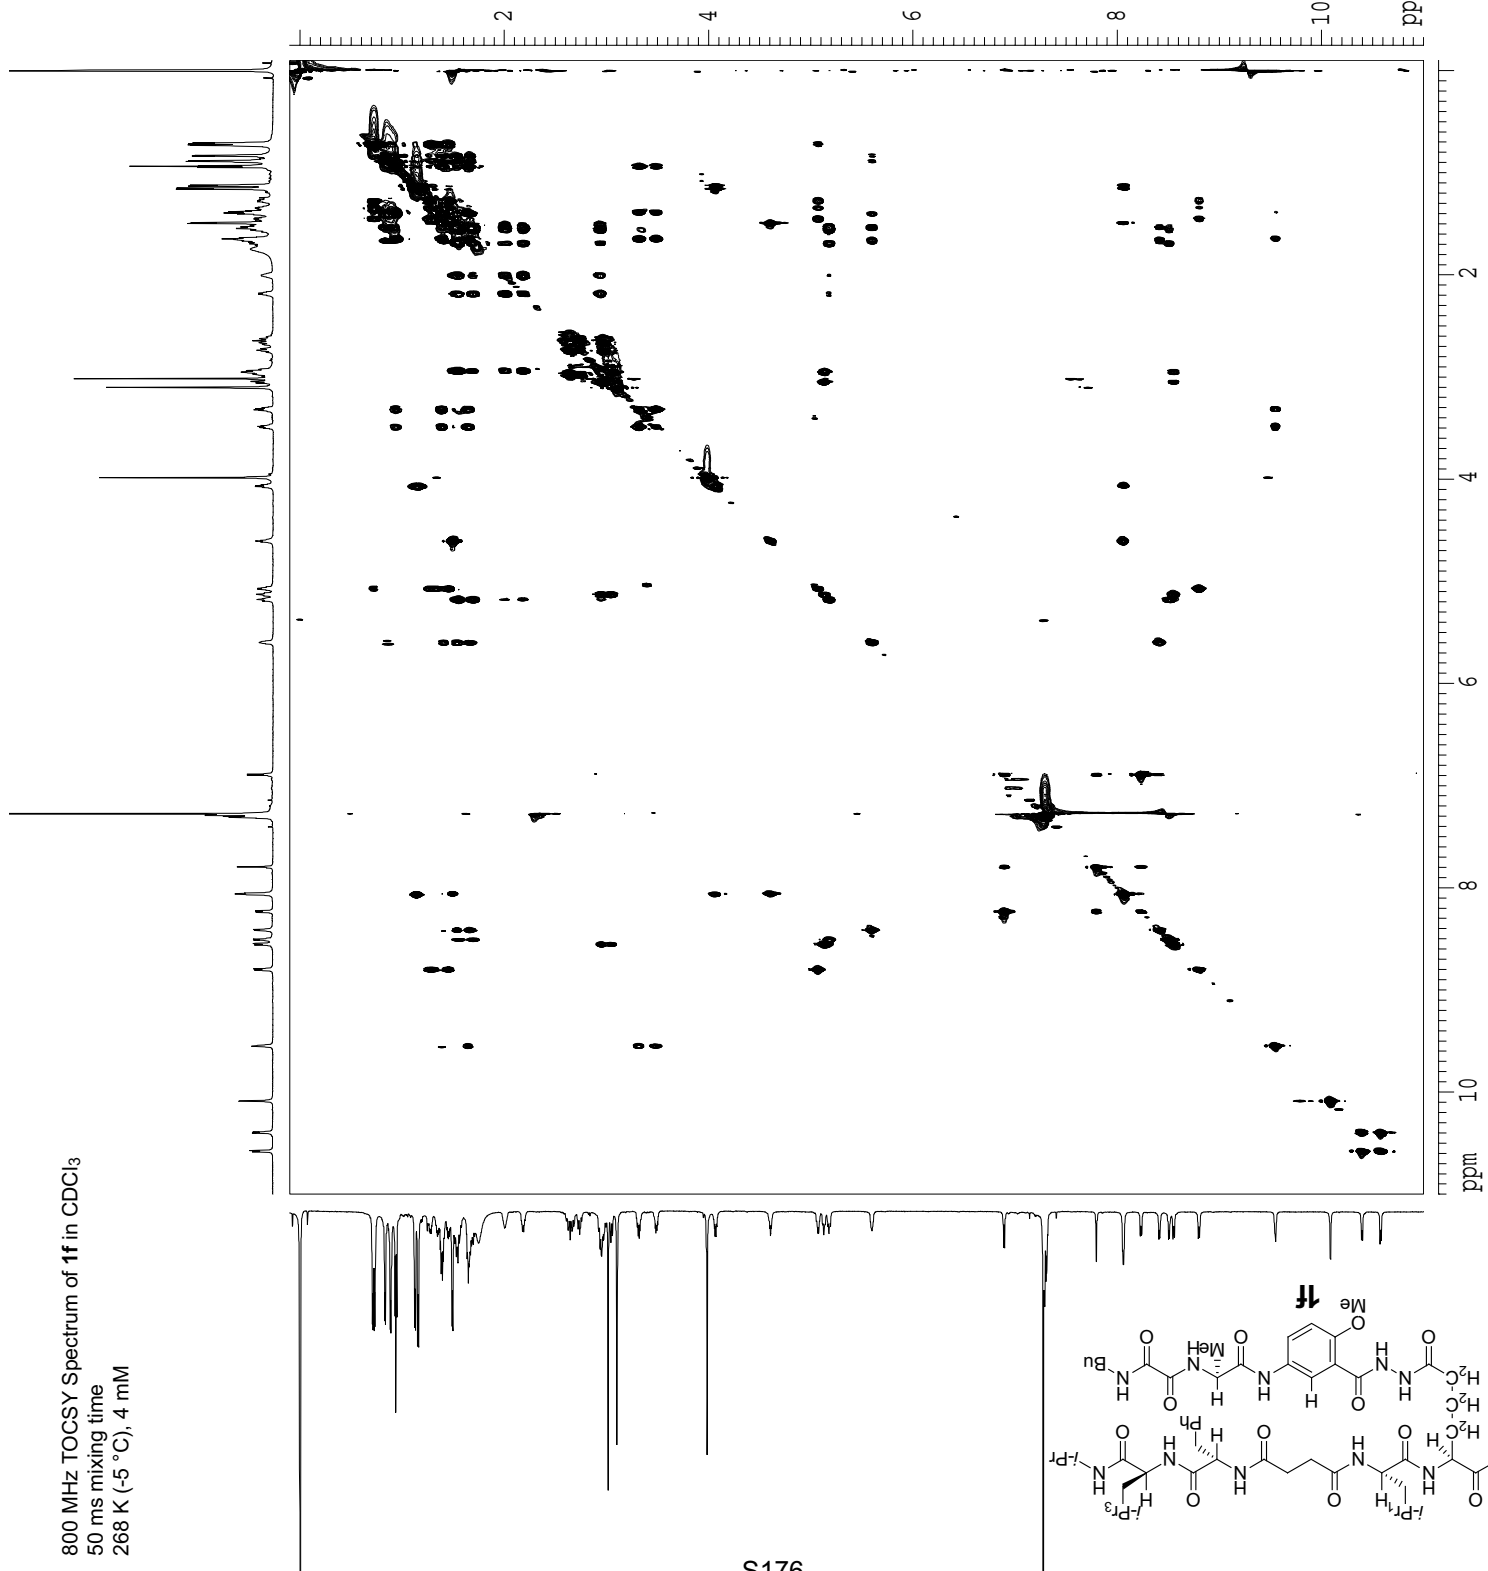

800 MHz TOCSY Spectrum of **1f** in CDCl<sub>3</sub>  
 50 ms mixing time  
 268 K (-5 °C), 4 mM



800 MHz TOCSY Spectrum of **1f** in CDCl<sub>3</sub>  
 50 ms mixing time  
 268 K (-5 °C), 4 mM

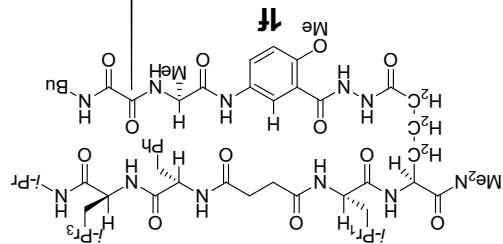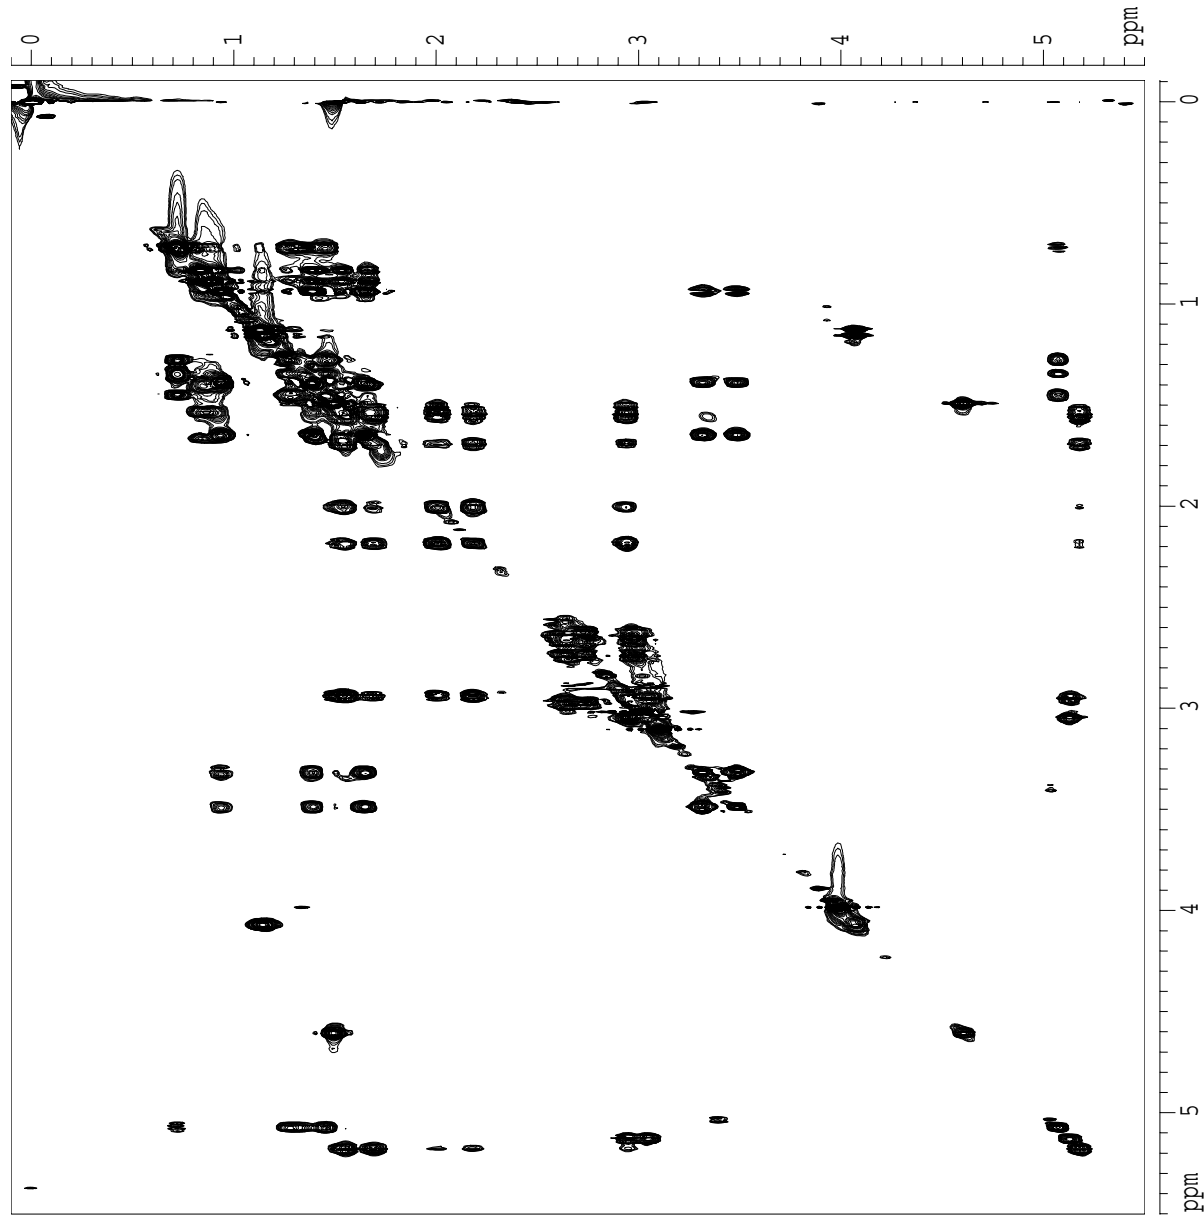

S177

Supporting Information

Current Data Parameters  
 USER slewin  
 NAME SL-7-124-800-H  
 EXPNO 3  
 PROCNO 1

F2 - Acquisition Parameters  
 Date\_ 20061030  
 Time 0.00  
 INSTRUM varian  
 PROBHD 40-5mm broadband  
 PULPROG wgtocsy\_bn  
 TD 4096  
 SOLVENT CDCl<sub>3</sub>  
 NS 32  
 DS 64  
 SWH 11001.101 Hz  
 FIDRES 2.685816 Hz  
 AQ 0.1862132 sec  
 RG 287.4  
 DW 45.450 usec  
 DE 6.00 usec  
 TE 268.5 K

F1 - Acquisition parameters  
 ND0 1  
 TD 256  
 SF01 799.8107 MHz  
 FIDRES 42.973049 Hz  
 SW 13.755 ppm  
 FMODE undefined

F2 - Processing parameters  
 SI 2048  
 SF 799.8064116 MHz  
 WDW QSINE  
 SSB 2  
 LB 0.00 Hz  
 GB 0  
 PC 1.40

F1 - Processing parameters  
 SI 1024  
 MC2 States  
 SF 799.8064116 MHz  
 WDW QSINE  
 SSB 2  
 LB 0.00 Hz  
 GB 0

2D NMR plot parameters  
 CX2 15.00 cm  
 CX1 15.00 cm  
 F2PLO 5.502 ppm  
 F2LO 4400.36 Hz  
 F2PHI -0.106 ppm  
 F2HI -84.95 Hz  
 F1PLO 5.502 ppm  
 F1LO 4400.36 Hz  
 F1PHI -0.100 ppm  
 F1HI -79.98 Hz  
 F2PPCM 0.37387 ppm/cm  
 F2HZCM 299.02078 Hz/cm  
 F1PPCM 0.37345 ppm/cm  
 F1HZCM 298.68924 Hz/cm

S. Levin and J. S. Nowick

Supporting Information

Current Data Parameters  
 USER slevin  
 NAME SL-7-124-800-H  
 EXPNO 3  
 PROCNO 1

F2 - Acquisition Parameters

Date 20061030  
 Time 0.00  
 INSTRUM varian  
 PROBHD 40-5mm broadband  
 PULPROG wgtocsy\_bn  
 TD 4096  
 SOLVENT CDCl3  
 NS 32  
 DS 64  
 SWH 11001.101 Hz  
 FIDRES 2.685816 Hz  
 AQ 0.1862132 sec  
 RG 287.4  
 DW 45.450 usec  
 DE 6.00 usec  
 TE 268.5 K

F1 - Acquisition Parameters

ND0 1  
 TD 256  
 SF01 799.8107 MHz  
 FIDRES 42.973049 Hz  
 SW 13.755 ppm  
 FMODE undefined

F2 - Processing parameters

SI 2048  
 SF 799.8064116 MHz  
 WDW QSINE  
 SSB 2  
 LB 0.00 Hz  
 GB 0  
 PC 1.40

F1 - Processing parameters

SI 1024  
 MC2 States  
 SF 799.8064116 MHz  
 WDW QSINE  
 SSB 2  
 LB 0.00 Hz  
 GB 0

S. Levin and J. S. Nowick

2D NMR plot parameters

CX2 15.00 cm  
 CX1 15.00 cm  
 F2PLO 11.000 ppm  
 FZLO 8797.87 Hz  
 F2PHI 5.500 ppm  
 F2HI 4398.94 Hz  
 F1PLO 5.502 ppm  
 F1LO 4400.36 Hz  
 F1PHI -0.113 ppm  
 F1HI -90.33 Hz  
 F2PFCM 0.36667 ppm/cm  
 F2HZCM 293.26236 Hz/cm  
 F1PFCM 0.37431 ppm/cm  
 F1HZCM 299.37891 Hz/cm

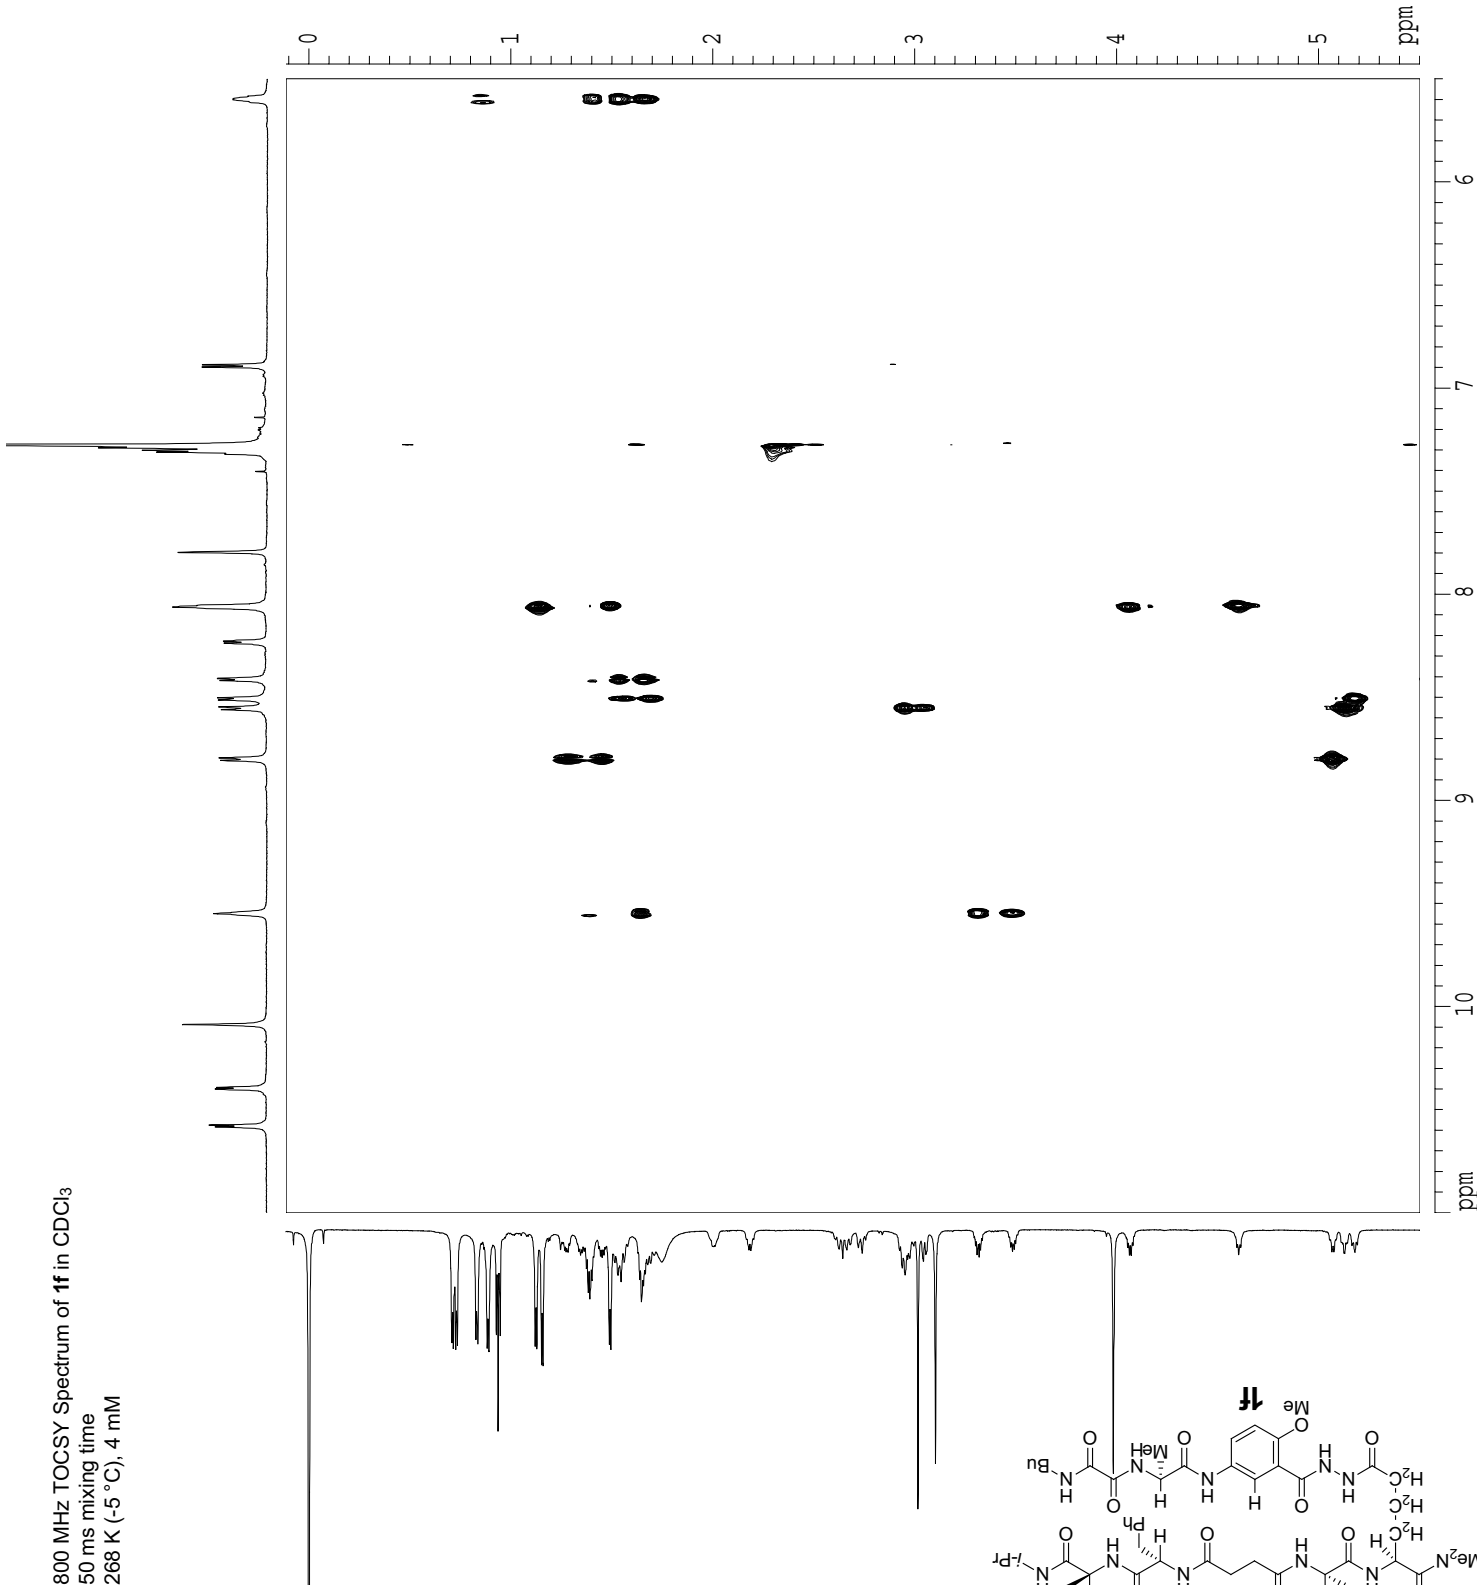

800 MHz TOCSY Spectrum of **1f** in CDCl<sub>3</sub>  
 50 ms mixing time  
 268 K (-5 °C), 4 mM

Supporting Information

Current Data Parameters  
 USER slewin  
 NAME SL-7-124-800-H  
 EXPNO 3  
 PROCNO 1

F2 - Acquisition Parameters

Date 20061030  
 Time 0.00  
 INSTRUM varian  
 PROBHD 40:5mm broadband  
 PULPROG wgtocsy\_bn  
 TD 4096  
 SOLVENT CDCl3  
 NS 32  
 DS 64  
 SWH 11001.101 Hz  
 FIDRES 2.685816 Hz  
 AQ 0.1862132 sec  
 RG 287.4  
 DW 45.450 usec  
 DE 6.00 usec  
 TE 268.5 K

F1 - Acquisition Parameters

ND0 1  
 TD 256  
 SF01 799.8107 MHz  
 FIDRES 42.973049 Hz  
 SW 13.755 ppm  
 FmMODE undefined

F2 - Processing Parameters

SI 2048  
 SF 799.8064116 MHz  
 WDW QSI  
 SSB 2  
 LB 0.00 Hz  
 GB 0  
 PC 1.40

F1 - Processing Parameters

SI 1024  
 MC2 States  
 SF 799.8064116 MHz  
 WDW QSI  
 SSB 2  
 LB 0.00 Hz  
 GB 0

S. Levin and J. S. Nowick

2D NMR plot parameters  
 CX2 15.00 cm  
 CX1 15.00 cm  
 F2PLO 11.002 ppm  
 F2LO 8799.72 Hz  
 F2PHI 5.495 ppm  
 F2HI 4394.99 Hz  
 F1PLO 11.000 ppm  
 F1LO 8797.87 Hz  
 F1PHI 5.500 ppm  
 F1HI 4398.94 Hz  
 F2PFCM 0.36715 ppm/cm  
 F2HZCM 293.64917 Hz/cm  
 F1PFCM 0.36667 ppm/cm  
 F1HZCM 293.26236 Hz/cm

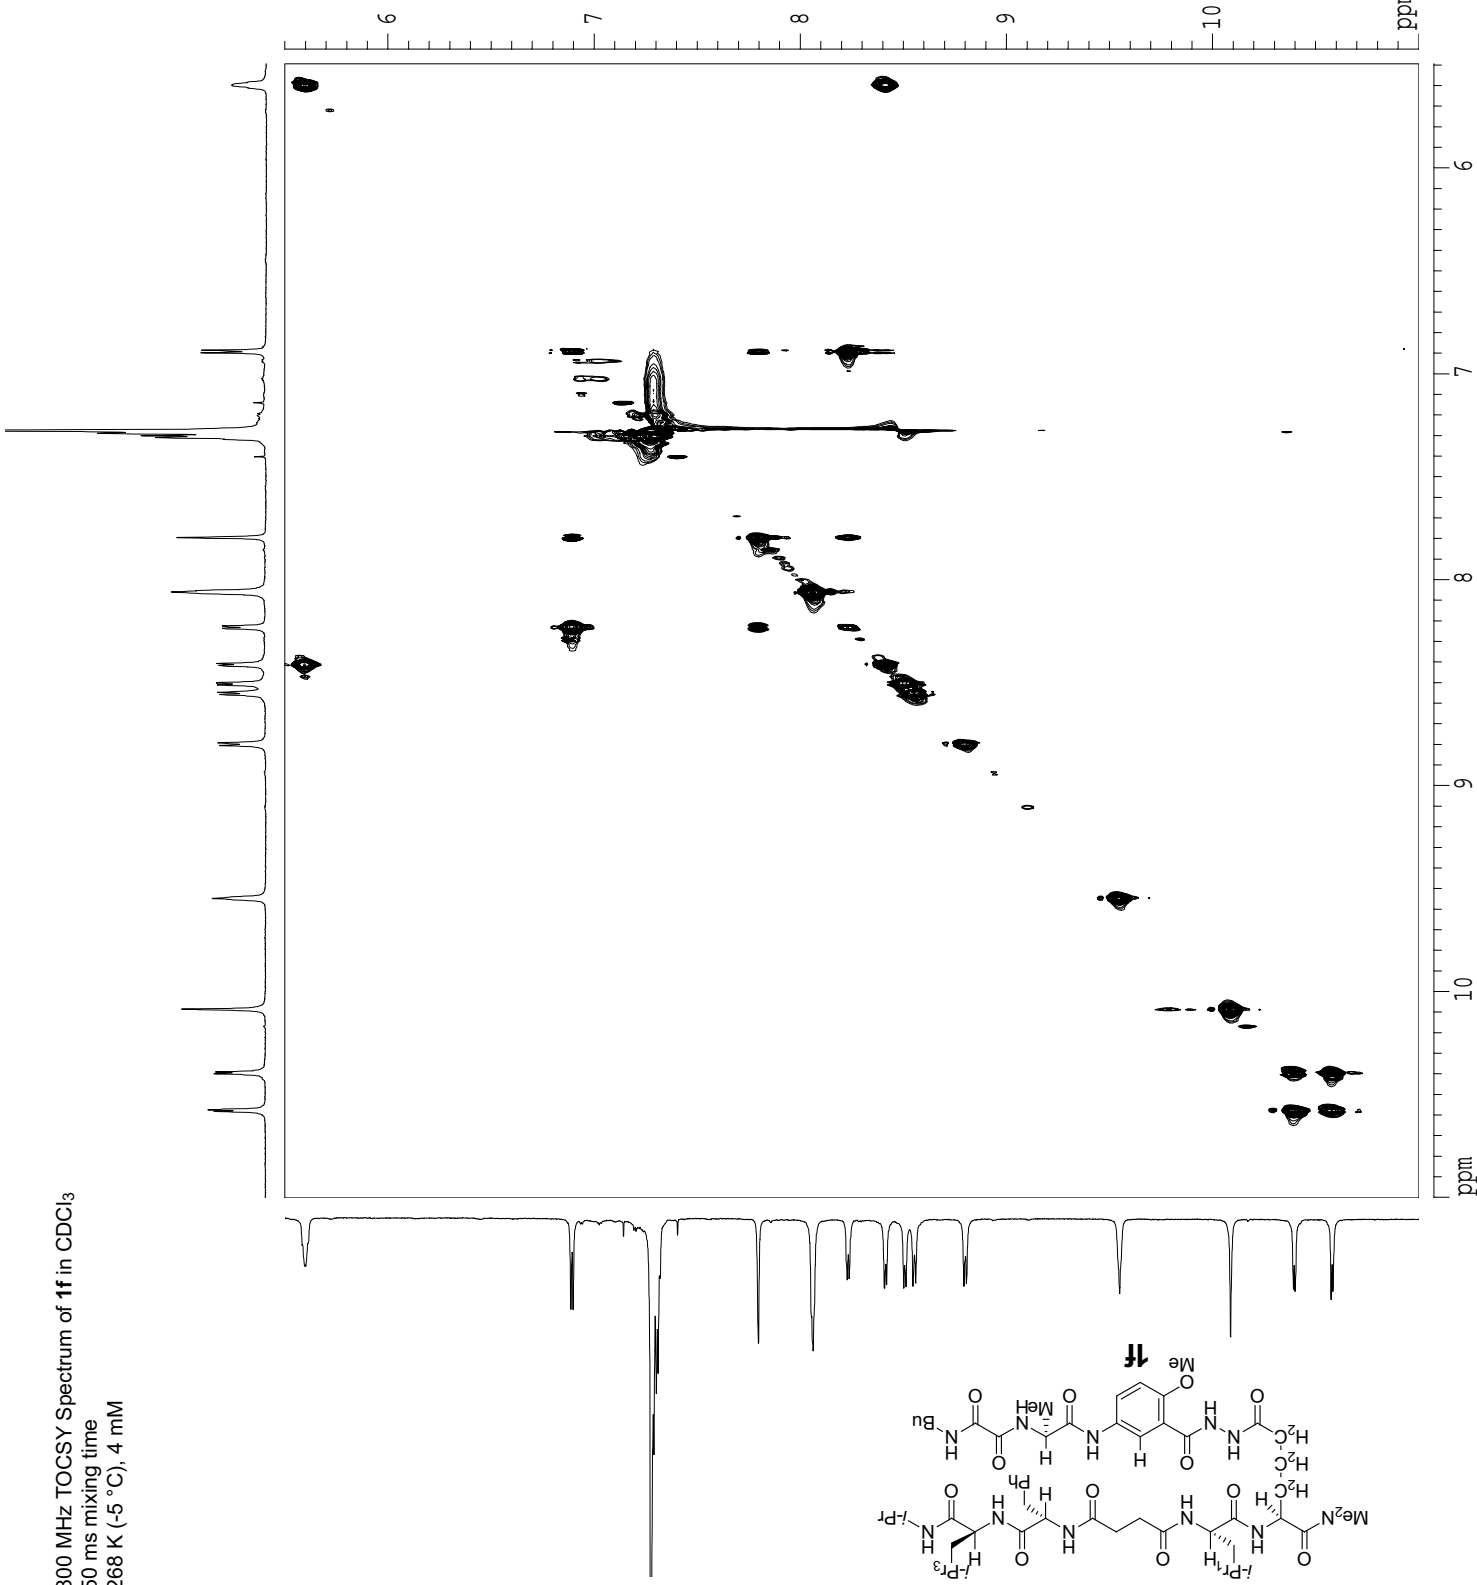

800 MHz TOCSY Spectrum of **1f** in CDCl<sub>3</sub>  
 50 ms mixing time  
 268 K (-5 °C), 4 mM

Supporting Information

Current Data Parameters  
 USER slevin  
 NAME SL-7-124-800-H  
 EXPNO 3  
 PROCNO 1

F2 - Acquisition Parameters  
 Date\_ 20061030  
 Time\_ 0.00  
 INSTRUM varian  
 PROBHD 40:5mmBroadban  
 PULPROG wgtocsy\_bn  
 TD 4096  
 SOLVENT CDCl3  
 NS 32  
 DS 64  
 SWH 11001.101 Hz  
 FIDRES 2.685816 Hz  
 AQ 0.1862132 sec  
 RG 287.4  
 DW 45.450 usec  
 DE 6.00 usec  
 TE 268.5 K

F1 - Acquisition parameters  
 ND0 1  
 TD 256  
 SFO1 799.8107 MHz  
 FIDRES 42.973049 Hz  
 SW 13.755 ppm  
 F1MODE undefined

F2 - Processing parameters  
 SI 2048  
 SF 799.8064116 MHz  
 WDW QSI  
 SSB 2  
 LB 0.00 Hz  
 GB 0  
 PC 1.40

F1 - Processing parameters  
 SI 1024  
 MC2 States  
 SF 799.8064116 MHz  
 WDW QSI  
 SSB 2  
 LB 0.00 Hz  
 GB 0

S. Levin and J. S. Nowick

2D NMR plot parameters  
 CX2 15.00 cm  
 CX1 15.00 cm  
 F2PLO 5.500 ppm  
 F2LO 4398.94 Hz  
 F2PHI -0.100 ppm  
 F2HI -79.98 Hz  
 F1PLO 11.009 ppm  
 F1LO 8805.09 Hz  
 F1PHI 5.488 ppm  
 F1HI 4389.61 Hz  
 F2PPMCM 0.37333 ppm/cm  
 F2HZCM 298.59439 Hz/cm  
 F1PPMCM 0.36805 ppm/cm  
 F1HZCM 294.36536 Hz/cm

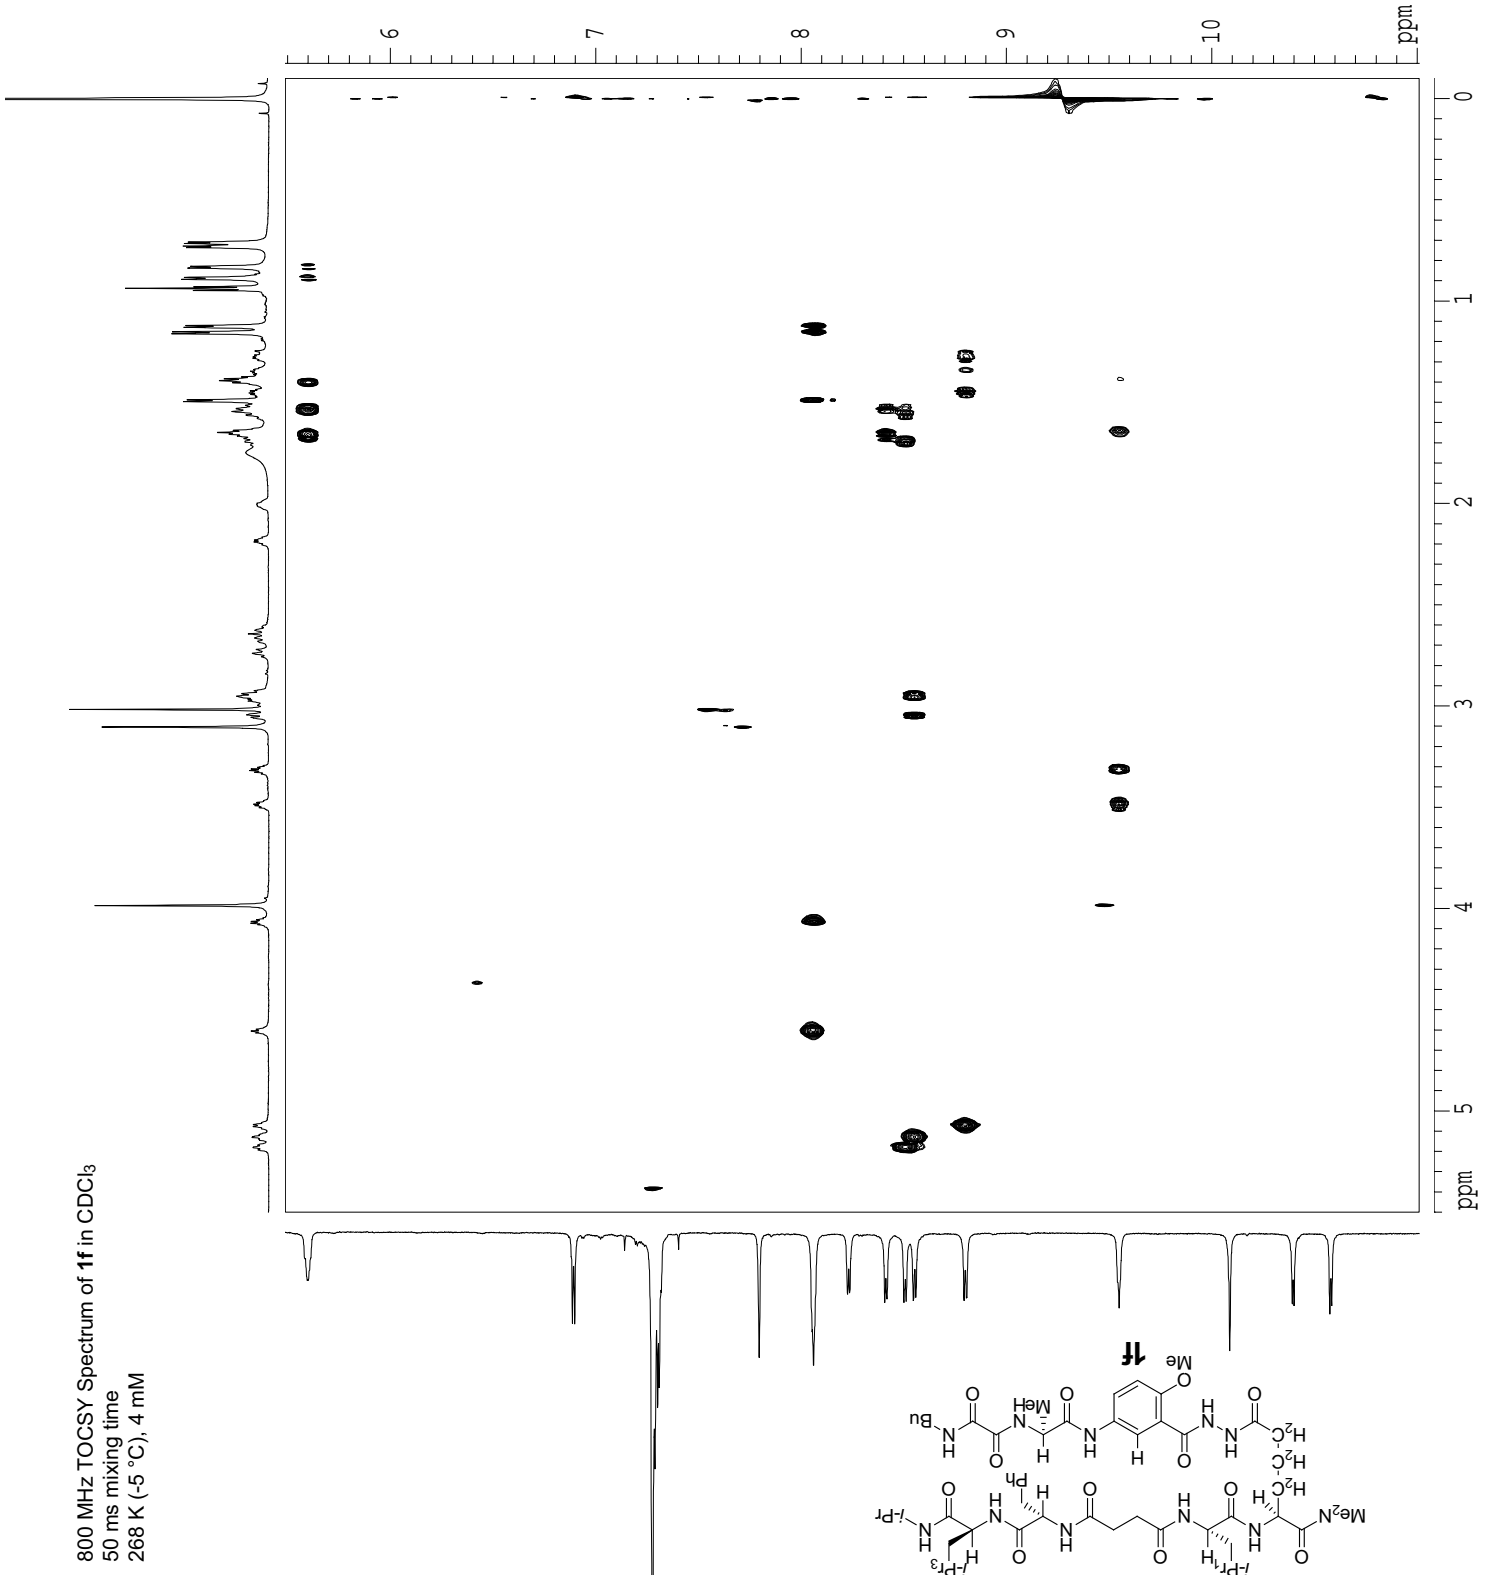

800 MHz TOCSY Spectrum of **1f** in CDCl<sub>3</sub>  
 50 ms mixing time  
 268 K (-5 °C), 4 mM

Supporting Information

Current Data Parameters  
 USER slewin  
 NAME SL-7-124-800-H  
 EXPNO 3  
 PROCNO 1

F2 - Acquisition Parameters

Date\_ 20061030  
 Time\_ 0.00  
 INSTRUM varian  
 PROBHD 40:5mmBroadban  
 PULPROG wgtocsy\_bn  
 TD 4096  
 SOLVENT CDC13  
 NS 32  
 DS 64  
 SWH 11001.101 Hz  
 FIDRES 2.685816 Hz  
 AQ 0.1862132 sec  
 RG 287.4  
 DW 45.450 usec  
 DE 6.00 usec  
 TE 268.5 K

F1 - Acquisition Parameters

ND0 1  
 TD 256  
 SFO1 799.8107 MHz  
 FIDRES 42.973049 Hz  
 SW 13.755 ppm  
 FreqMODE undefined

F2 - Processing parameters

SI 2048  
 SF 799.8064116 MHz  
 WDW QSI  
 SSB 2  
 LB 0.00 Hz  
 GB 0  
 PC 1.40

F1 - Processing parameters

SI 1024  
 MC2 States  
 SF 799.8064116 MHz  
 WDW QSI  
 SSB 2  
 LB 0.00 Hz  
 GB 0

2D NMR plot parameters

CX2 15.00 cm  
 CX1 15.00 cm  
 F2FLO 2.258 ppm  
 F2LO 1805.86 Hz  
 F2PHI 0.384 ppm  
 F2HI 307.18 Hz  
 F1FLO 5.730 ppm  
 F1LO 4582.99 Hz  
 F1PHI 0.451 ppm  
 F1HI 360.89 Hz  
 F2PPMCM 0.12492 ppm/cm  
 F2HZCM 99.91232 Hz/cm  
 F1PPMCM 0.35193 ppm/cm  
 F1HZCM 281.47345 Hz/cm

800 MHz TOCSY Spectrum of **1f** in CDCl<sub>3</sub>  
 50 ms mixing time  
 268 K (-5 °C), 4 mM

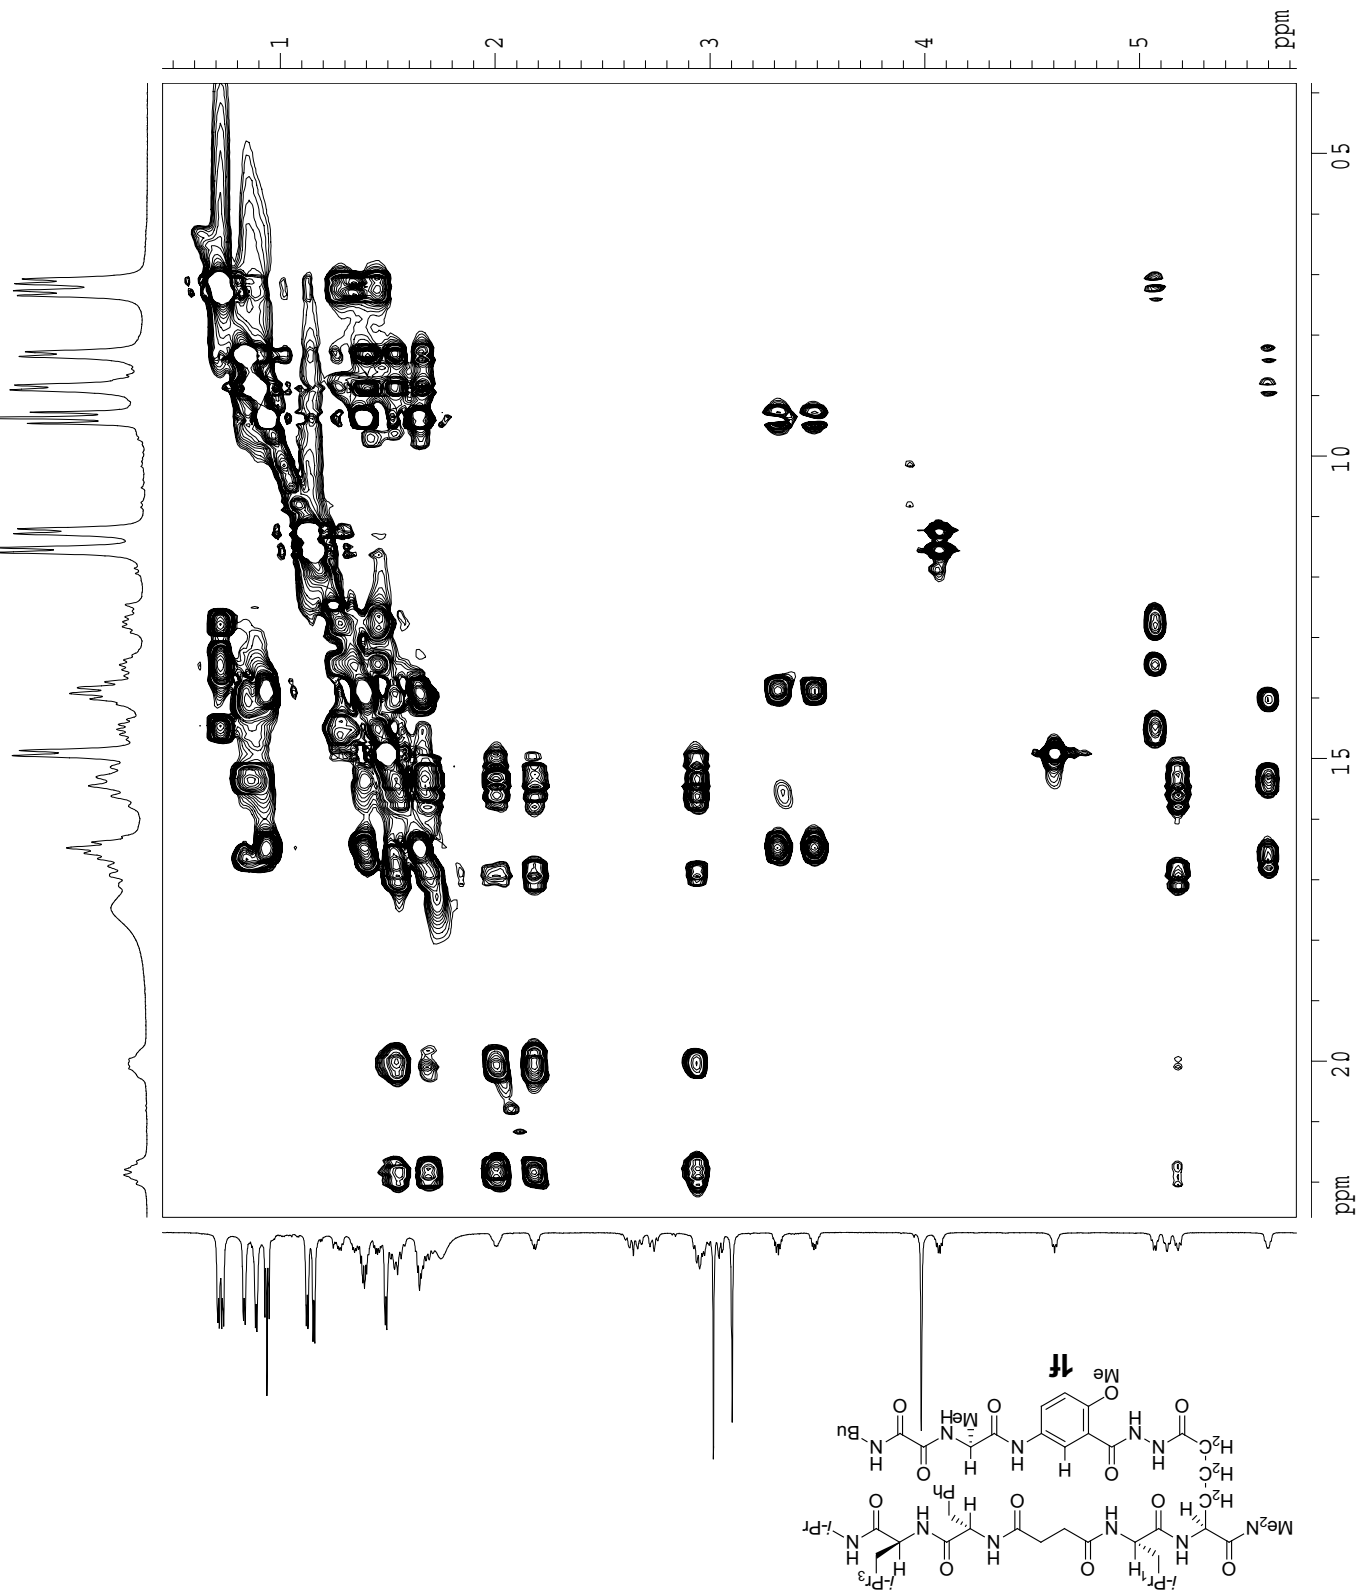

Supporting Information

Current Data Parameters  
 USER slevin  
 NAME SL-7-124-800-H  
 EXPNO 3  
 PROCNO 1

F2 - Acquisition Parameters

Date\_ 20061030  
 Time\_ 0.00  
 INSTRUM varian  
 PROBHD 40:5mmroadban  
 PULPROG wgtocsy\_bn  
 TD 4096  
 SOLVENT CDCl3  
 NS 32  
 DS 64  
 SWH 11001.101 Hz  
 FIDRES 2.685816 Hz  
 AQ 0.1862132 sec  
 RG 287.4  
 DW 45.450 usec  
 DE 6.00 usec  
 TE 268.5 K

F1 - Acquisition Parameters

ND0 1  
 TD 256  
 SF01 799.8107 MHz  
 FIDRES 42.973049 Hz  
 SW 13.755 ppm  
 F1MODE undefined

F2 - Processing parameters

SI 2048  
 SF 799.8064116 MHz  
 WDW QSIINE  
 SSB 2  
 LB 0.00 Hz  
 GB 0  
 PC 1.40

F1 - Processing parameters

SI 1024  
 MC2 States  
 SF 799.8064116 MHz  
 WDW QSIINE  
 SSB 2  
 LB 0.00 Hz  
 GB 0

S. Levin and J. S. Nowick

2D NMR plot parameters  
 CX2 15.00 cm  
 CX1 15.00 cm  
 F2PLO 1.794 ppm  
 F2LO 1435.22 Hz  
 F2PHI 0.579 ppm  
 F2HI 462.95 Hz  
 F1PLO 2.265 ppm  
 F1LO 1811.23 Hz  
 F1PHI 0.505 ppm  
 F1HI 403.86 Hz  
 F2P1MCM 0.08104 ppm/cm  
 F2HZCM 64.81768 Hz/cm  
 F1P1MCM 0.11731 ppm/cm  
 F1HZCM 93.82449 Hz/cm

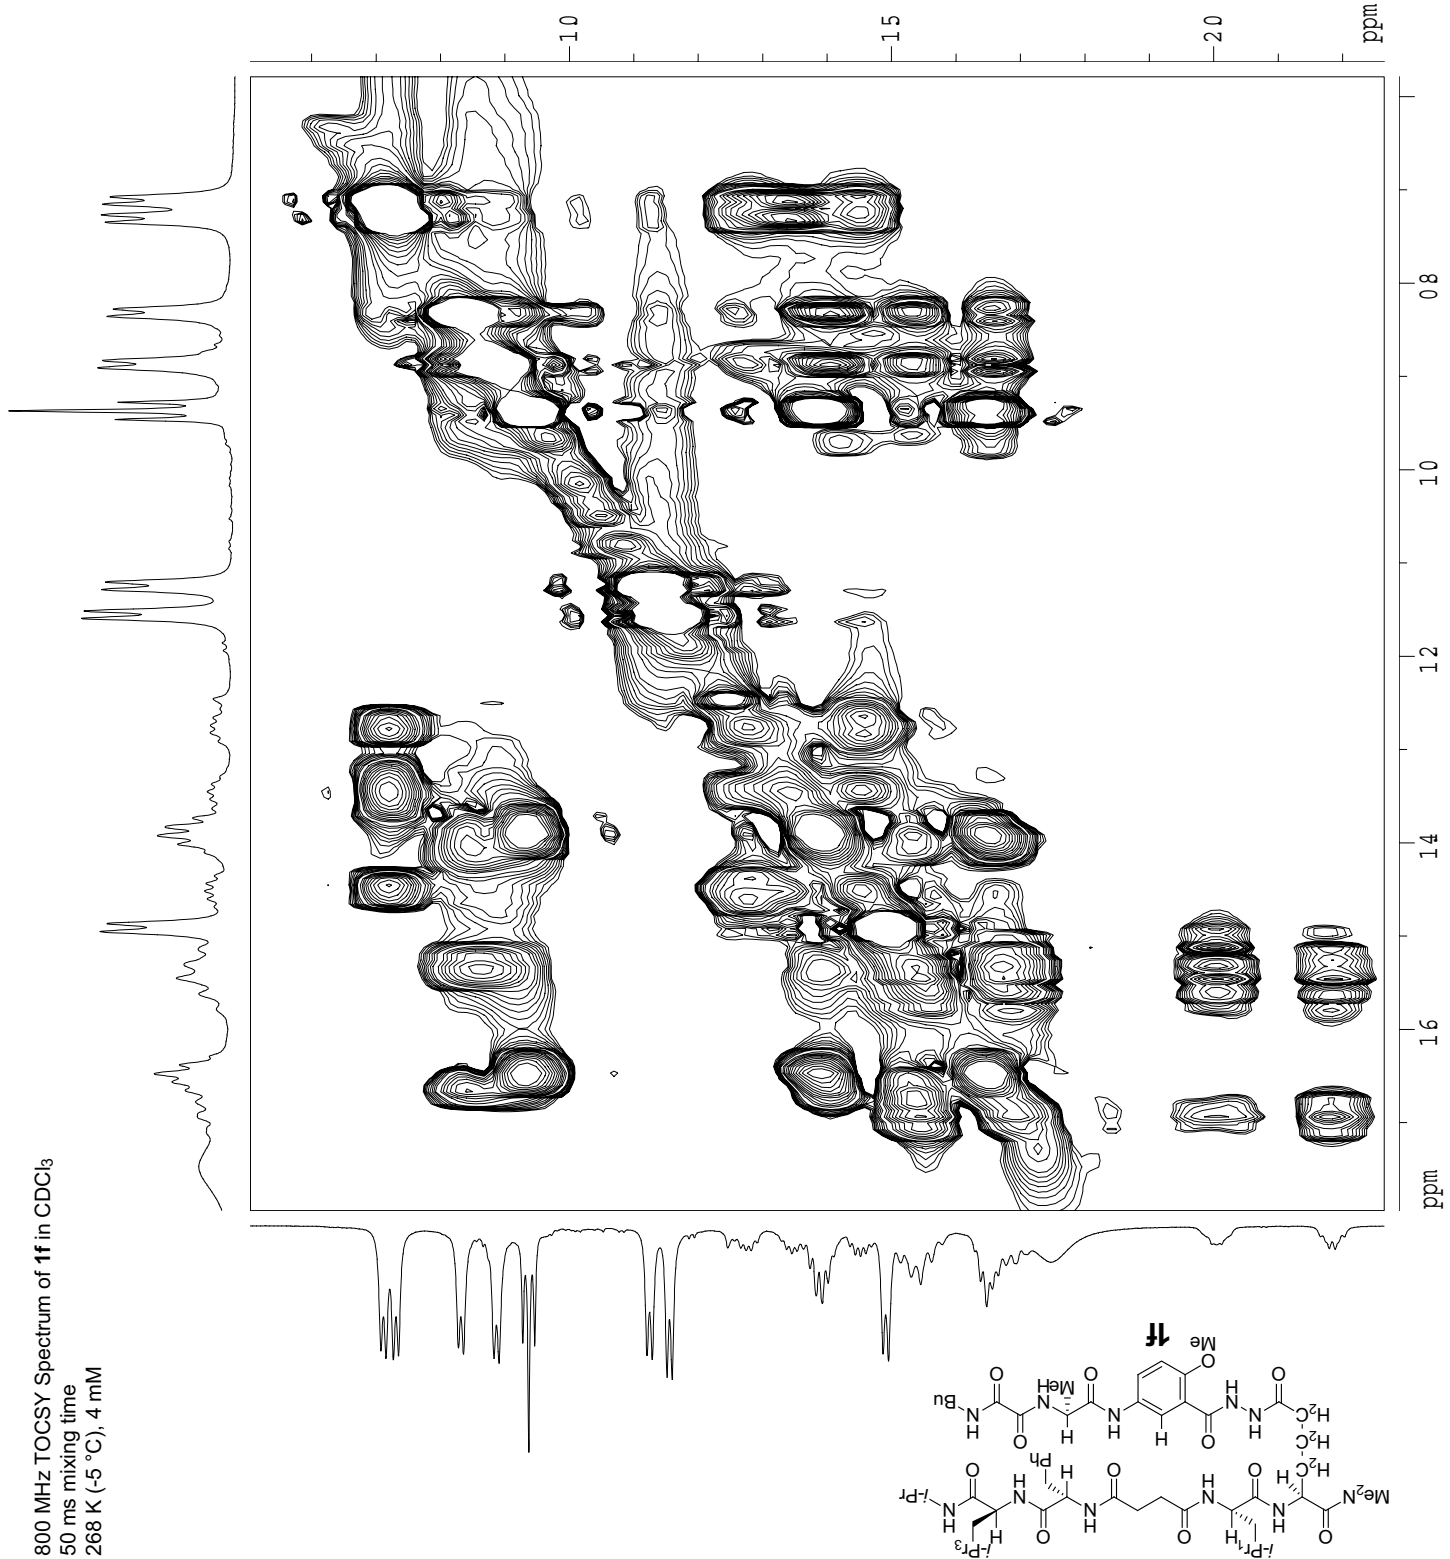

800 MHz TOCSY Spectrum of **1f** in CDCl<sub>3</sub>  
 50 ms mixing time  
 268 K (-5 °C), 4 mM

Current Data Parameters  
 USER slevin  
 NAME SL-7-124-800-H  
 EXPNO 4  
 PROCNO 1

F2 - Acquisition Parameters  
 Date\_ 20061030  
 Time 0.00  
 INSTRUM varian  
 PROBHD 40:5mmrbroadban  
 PULPROG noesy2o\_pfg\_800\_pln

TD 4096  
 SOLVENT CDCl3  
 NS 32  
 DS 64  
 SMH 11001.101 Hz  
 FIDRES 2.685816 Hz  
 AQ 0.1862132 sec  
 RG 128  
 DW 45.450 usec  
 DE 6.00 usec  
 TE 268.5 K

F1 - Acquisition parameters  
 NDO 1  
 TD 512  
 SFO1 799.8107 MHz  
 FIDRES 21.486525 Hz  
 SW 13.755 ppm  
 F1MODE undefined

F2 - Processing parameters  
 SI 4096  
 SF 799.8064116 MHz  
 WDM QSINE  
 SSB 2  
 LB 0.00 Hz  
 GB 0  
 PC 1.40

F1 - Processing parameters  
 SI 2048  
 MC2 States  
 SF 799.8064116 MHz  
 WDM QSINE  
 SSB 2  
 LB 0.00 Hz  
 GB 0

2D NMR plot parameters  
 CX2 15.00 cm  
 CX1 15.00 cm  
 F2PLO 11.002 ppm  
 F2LO 8799.72 Hz  
 F2PHI -0.103 ppm  
 F2HI -82.27 Hz  
 F1PLO 11.002 ppm  
 F1LO 8799.72 Hz  
 F1PHI -0.106 ppm  
 F1HI -84.95 Hz  
 F2PFCM 0.74035 ppm/cm  
 F2H2CM 592.13275 Hz/cm  
 F1PFCM 0.74057 ppm/cm  
 F1H2CM 592.31183 Hz/cm

800 MHz NOESY Spectrum of **1f** in CDCl<sub>3</sub>  
 400 ms mixing time  
 268 K (-5 °C), 4 mM

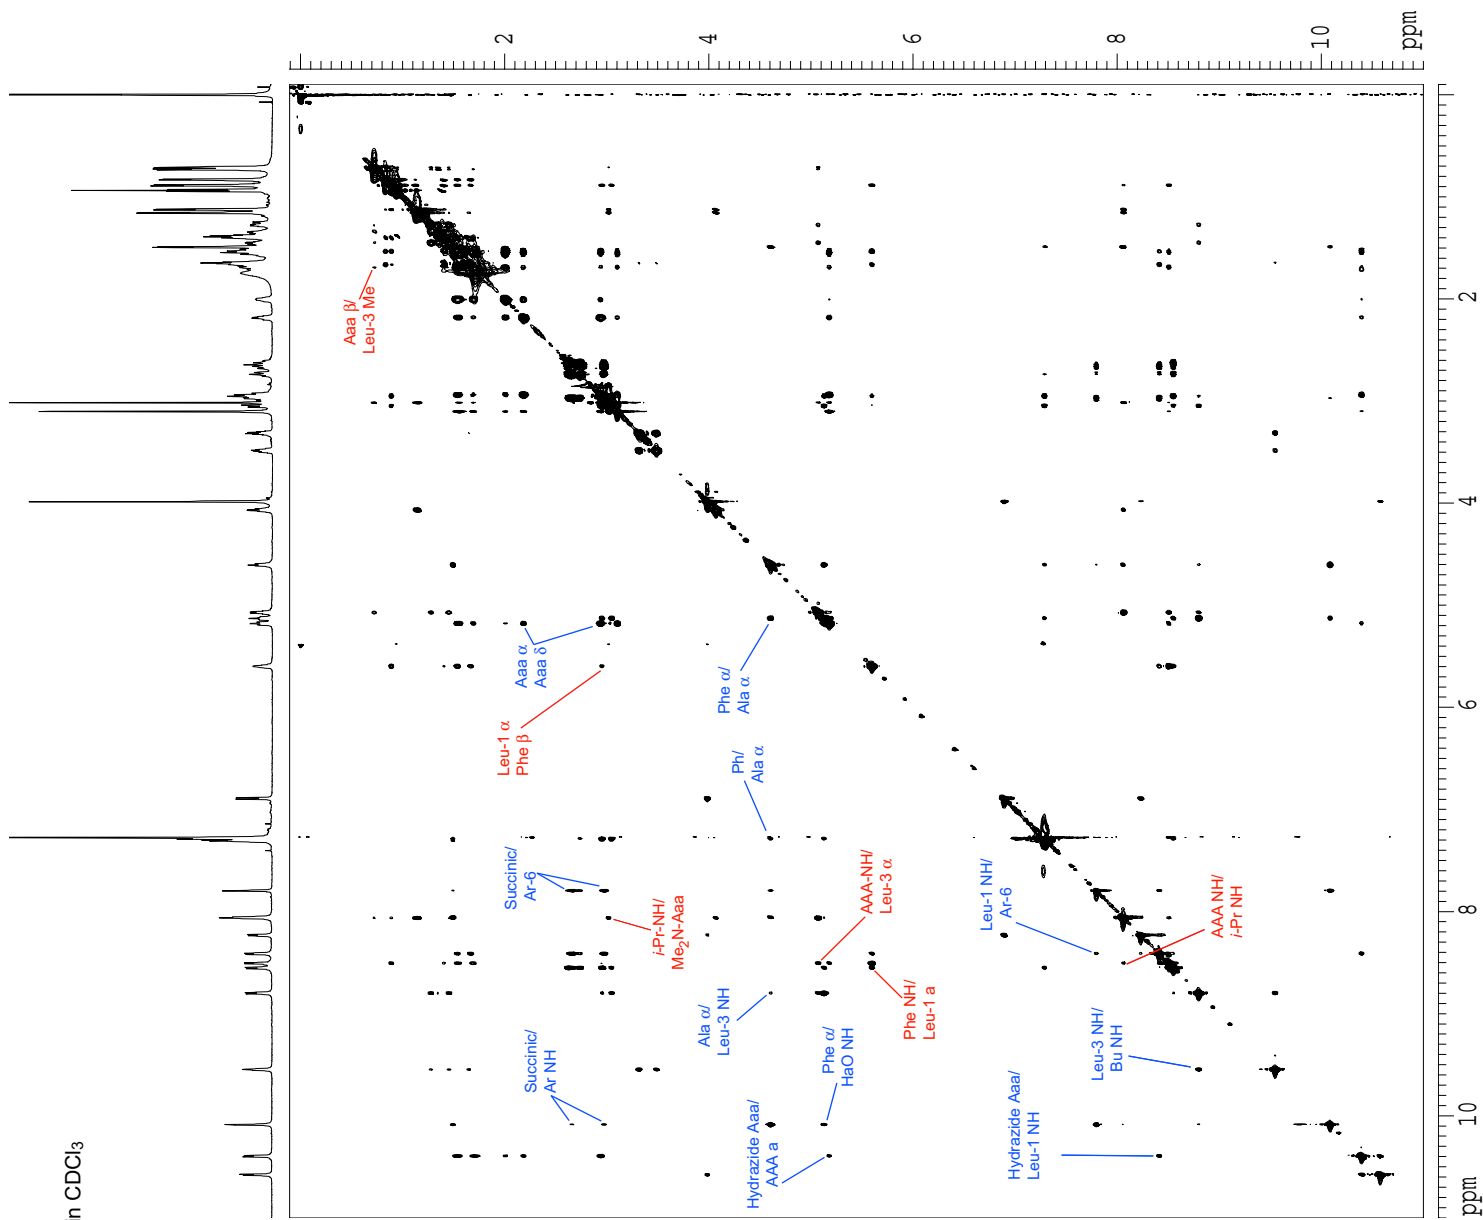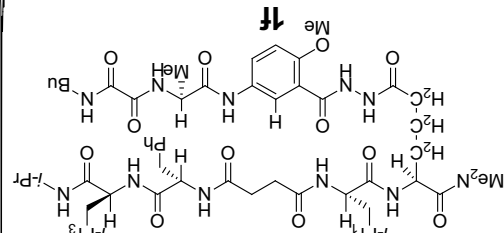

Current Data Parameters  
 USER slewin  
 NAME SL-7-124-800-H  
 EXPNO 4  
 PROCNO 1

F2 - Acquisition Parameters

Date\_ 20061030  
 Time 0.00  
 INSTRUM varian  
 PROBRD 40:5mm broadband  
 PULPROG noesyh2o\_pfg\_800\_pln  
 TD 4096  
 SOLVENT CDCl3  
 NS 32  
 DS 64  
 SWH 11001.101 Hz  
 FIDRES 2.685816 Hz  
 AQ 0.1862132 sec  
 RG 128  
 DW 45.450 usec  
 DE 6.00 usec  
 TE 268.15 K

F1 - Acquisition parameters

ND0 1  
 TD 512  
 SFO1 799.8107 MHz  
 FIDRES 21.486525 Hz  
 SW 13.755 ppm  
 F1MODE undefined

F2 - Processing parameters

SI 4096  
 SF 799.8064116 MHz  
 WDW QSI  
 SSB 2  
 LB 0.00 Hz  
 GB 0  
 PC 1.40

F1 - Processing parameters

SI 2048  
 MC2 States  
 SF 799.8064116 MHz  
 WDW QSI  
 SSB 2  
 LB 0.00 Hz  
 GB 0

2D NMR plot parameters

CX2 15.00 cm  
 CX1 15.00 cm  
 F2PLO 11.000 ppm  
 F2LO 8797.87 Hz  
 F2PHI -0.100 ppm  
 F2HI -79.98 Hz  
 F1PLO 11.000 ppm  
 F1LO 8797.87 Hz  
 F1PHI -0.100 ppm  
 F1HI -79.98 Hz  
 F2PFCM 0.74000 ppm/cm  
 F2HZCM 591.85669 Hz/cm  
 F1PFCM 0.74000 ppm/cm  
 F1HZCM 591.85669 Hz/cm

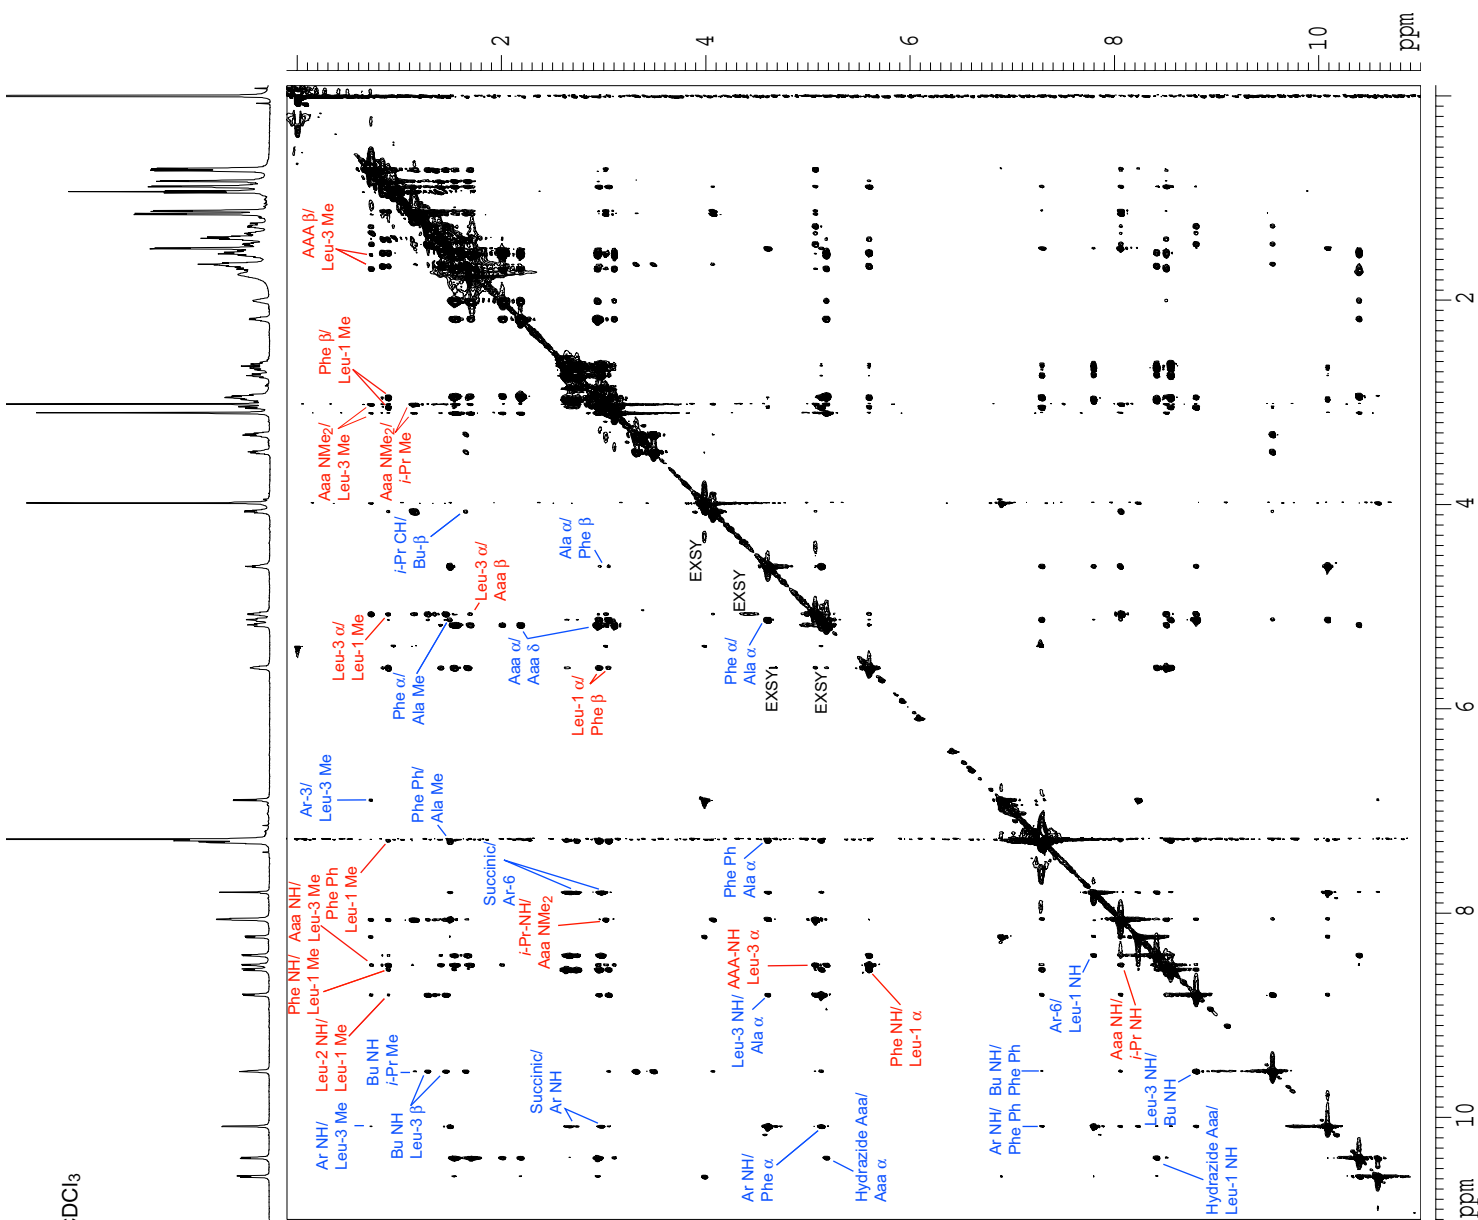

800 MHz NOESY Spectrum of **1f** in CDCl<sub>3</sub>  
 400 ms mixing time  
 268 K (-5 °C), 4 mM

Deeper slice

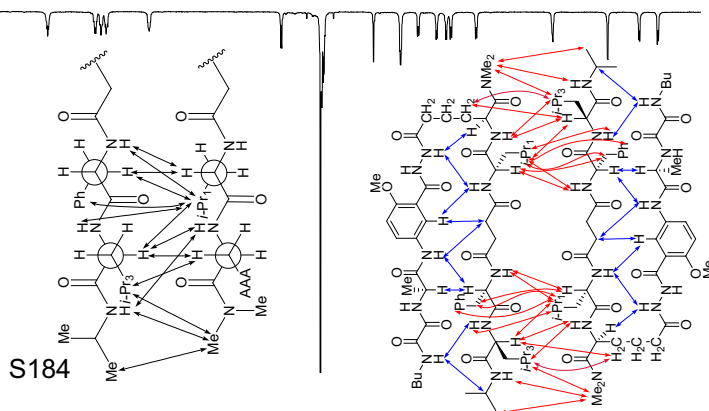



## Current Data Parameters

USER slevin  
 NAME SL-7-124-800-H  
 EXNO 4  
 PROCNO 1

## F2 - Acquisition Parameters

Date\_ 20061030  
 Time\_ 0.00  
 INSTRUM varian  
 PROBHD 40:5mm broadband  
 PULPROG noesyh2o\_pfg\_800\_pln  
 TD 4096  
 SOLVENT CDCl3

NS 32  
 DS 64  
 SWH 11001.101 Hz  
 FIDRES 2.685816 Hz  
 AQ 0.1862132 sec  
 RG 128  
 DW 45.450 usec  
 DE 6.00 usec  
 TE 268.5 K

## F1 - Acquisition Parameters

ND0 1  
 TD 512  
 SFO1 799.8107 MHz  
 FIDRES 21.486525 Hz  
 SW 13.755 ppm  
 FRMODE undefined

## F2 - Processing parameters

SI 4096  
 SF 799.8064116 MHz  
 WDM QSINE  
 SSB 2  
 LB 0.00 Hz  
 GB 0  
 PC 1.40

## F1 - Processing parameters

SI 2048  
 MC2 States  
 SF 799.8064116 MHz  
 WDM QSINE  
 SSB 2  
 LB 0.00 Hz  
 GB 0

## 2D NMR plot parameters

CX2 15.00 cm  
 CX1 15.00 cm  
 F2PLO 5.500 ppm  
 F2LO 4398.94 Hz  
 F2PHI -0.100 ppm  
 F2HI -79.98 Hz  
 F1PLO 5.500 ppm  
 F1LO 4398.94 Hz  
 F1PHI -0.100 ppm  
 F1HI -79.98 Hz  
 F2PPMCM 0.37333 ppm/cm  
 F2HZCM 298.59439 Hz/cm  
 F1PPMCM 0.37333 ppm/cm  
 F1HZCM 298.59439 Hz/cm

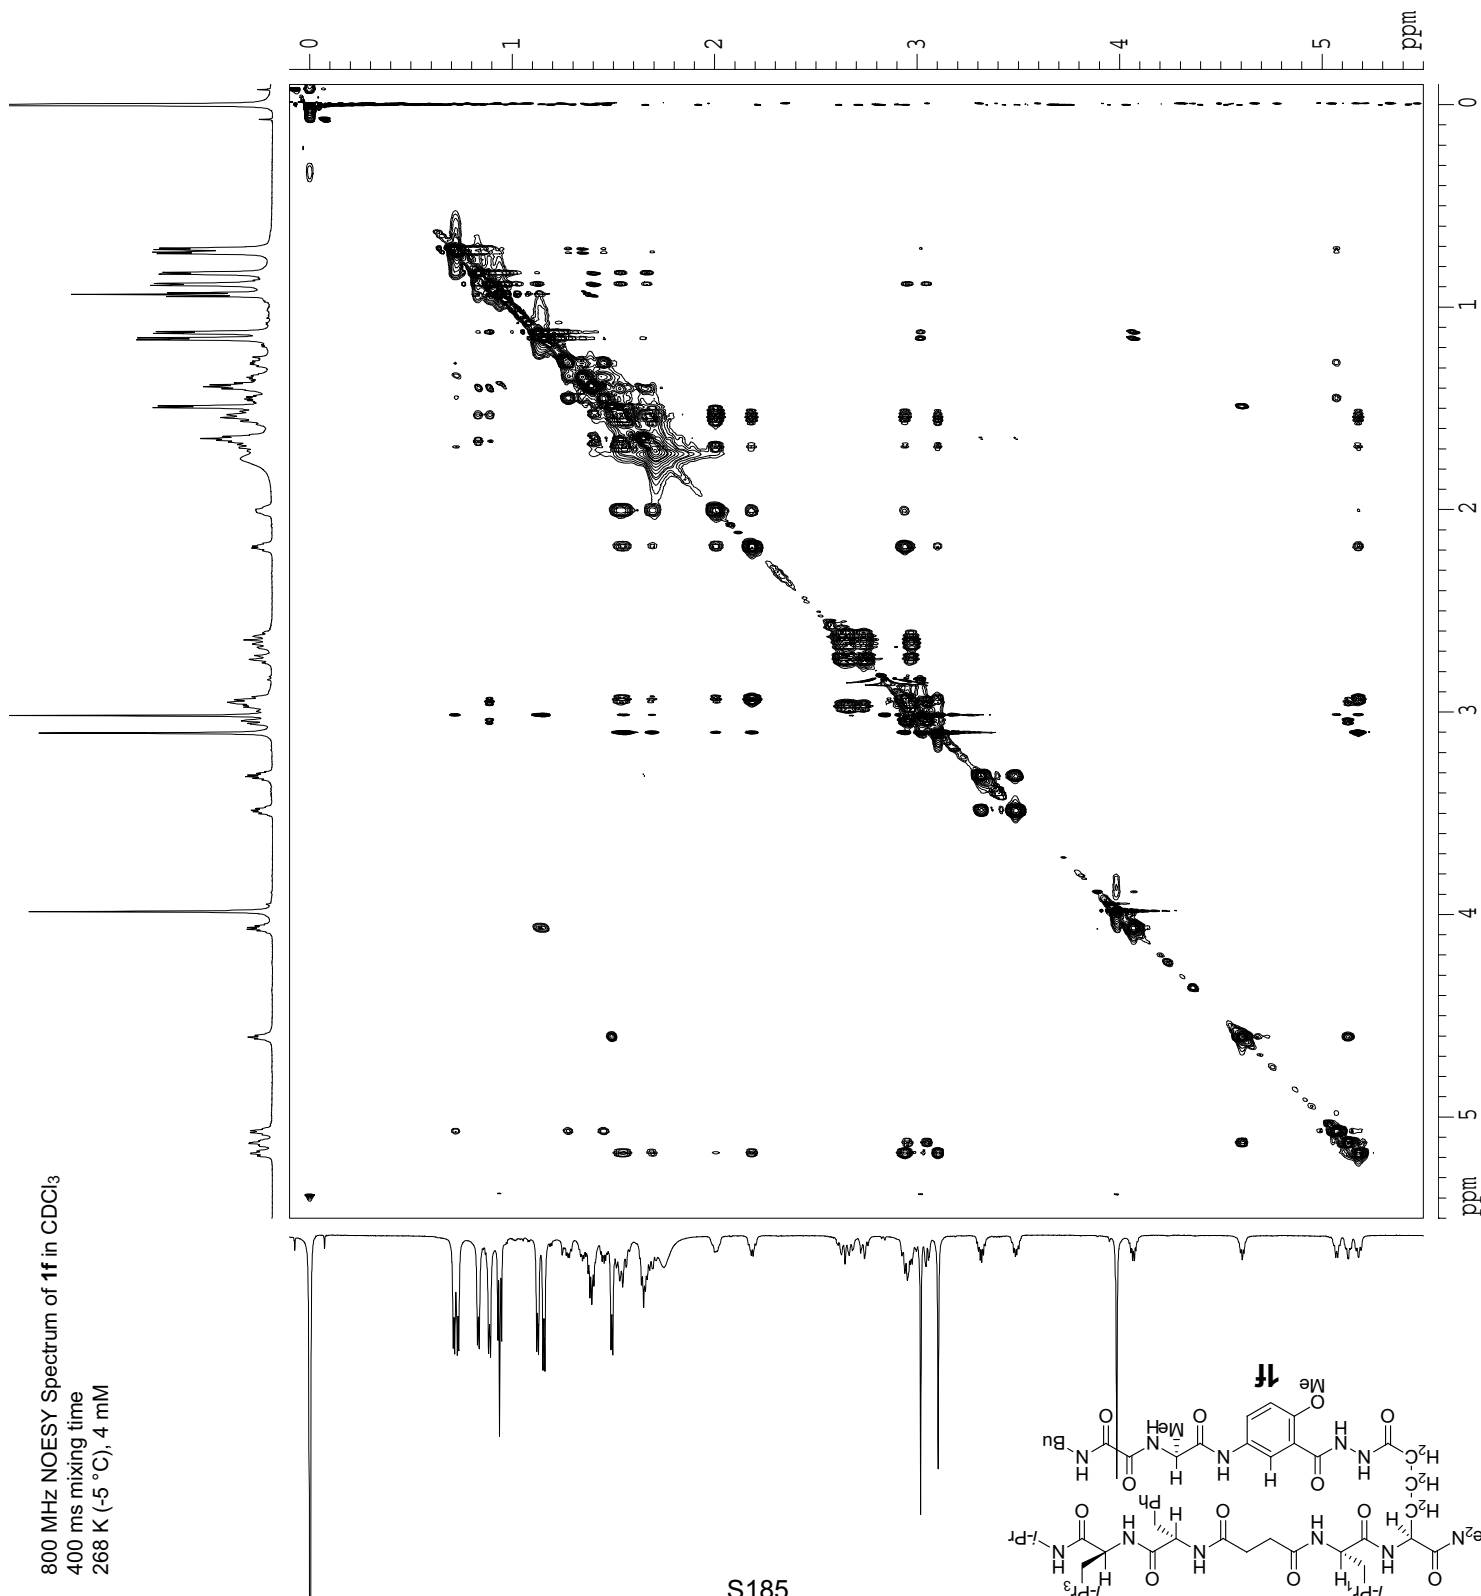

800 MHz NOESY Spectrum of **1f** in CDCl<sub>3</sub>  
 400 ms mixing time  
 268 K (-5 °C), 4 mM

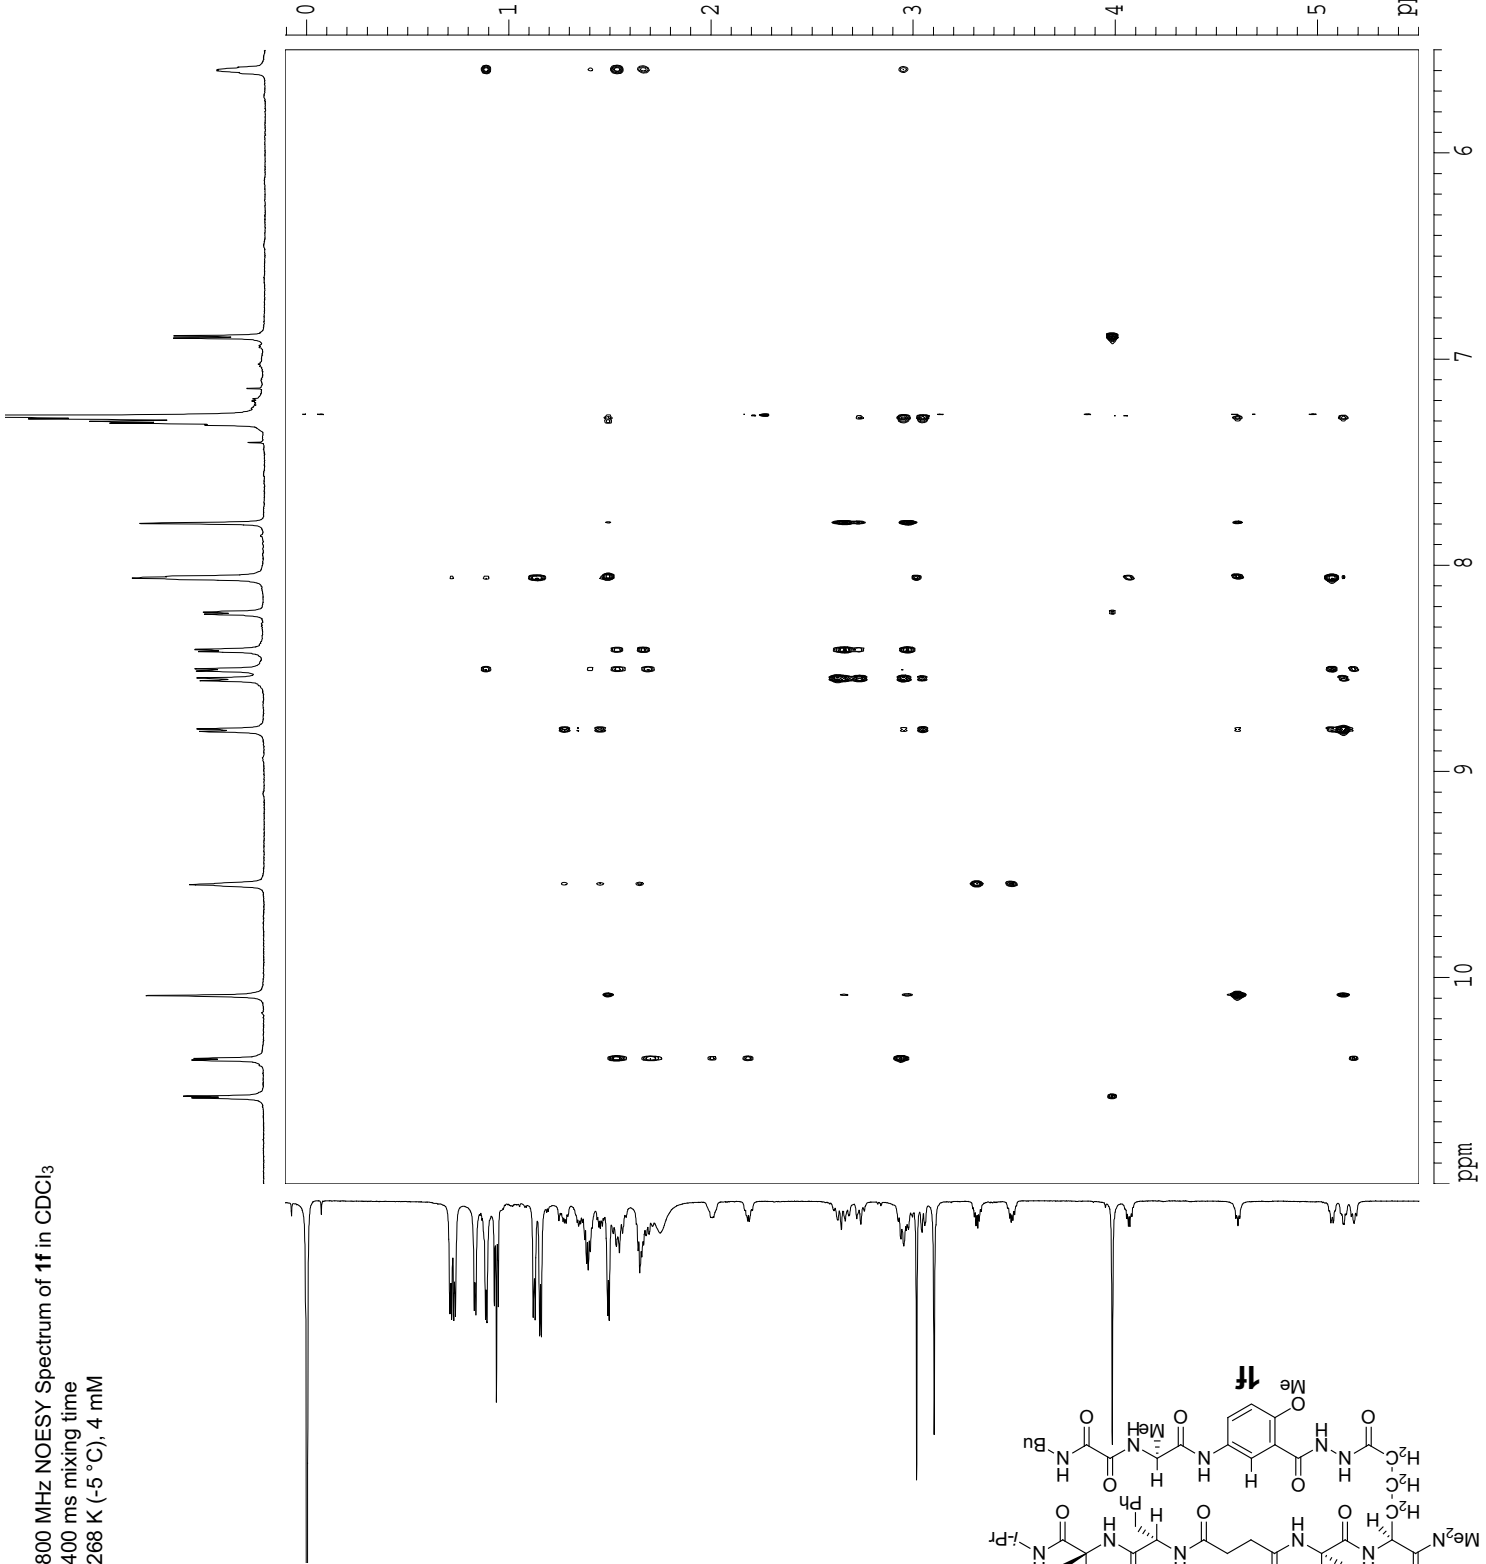

Supporting Information

Current Data Parameters  
 USER slewin  
 NAME SL-7-124-800-H  
 EXPNO 4  
 PROCNO 1

F2 - Acquisition Parameters  
 Date\_ 20061030  
 Time\_ 0.00  
 INSTRUM varian  
 PROBHD 40:5mmroadban  
 PULPROG noesyh2o\_pfg\_800\_pln  
 TD 4096  
 SOLVENT CDCl3  
 NS 32  
 DS 64  
 SWH 11001.101 Hz  
 FIDRES 2.685816 Hz  
 AQ 0.1862132 sec  
 RG 128  
 DW 45.450 usec  
 DE 6.00 usec  
 TE 268.5 K

F1 - Acquisition Parameters  
 ND0 1  
 TD 512  
 SFO1 799.8107 MHz  
 FIDRES 21.486525 Hz  
 SW 13.755 ppm  
 FMODE undefined

F2 - Processing parameters  
 SI 4096  
 SF 799.8064116 MHz  
 WDW QSINE  
 SSB 2  
 LB 0.00 Hz  
 GB 0  
 PC 1.40

F1 - Processing parameters  
 SI 2048  
 MC2 States  
 SF 799.8064116 MHz  
 WDW QSINE  
 SSB 2  
 LB 0.00 Hz  
 GB 0

2D NMR plot parameters  
 CX2 15.00 cm  
 CX1 15.00 cm  
 F2PLO 11.000 ppm  
 F2LO 8797.87 Hz  
 F2PHI 5.500 ppm  
 F2HI 4398.94 Hz  
 F1PLO 5.502 ppm  
 F1LO 4400.36 Hz  
 F1PHI -0.106 ppm  
 F1HI -84.95 Hz  
 F2PPMCM 0.36667 ppm/cm  
 F2HZCM 293.26236 Hz/cm  
 F1PPMCM 0.37387 ppm/cm  
 F1HZCM 299.02078 Hz/cm

S. Levin and J. S. Nowick

Current Data Parameters  
 USER slewin  
 NAME SL-7-124-800-H  
 EXPNO 4  
 PROCNO 1

## F2 - Acquisition Parameters

Date\_ 20061030  
 Time\_ 0.00  
 INSTRUM varian  
 PROBHD 40:5mmrbroadban  
 PULPROG noesyh2o\_pfg 800\_plh  
 TD 4096  
 SOLVENT CDC13  
 NS 32  
 DS 64  
 SWH 11001.101 Hz  
 FIDRES 2.685816 Hz  
 AQ 0.1862132 sec  
 RG 128  
 DW 45.450 usec  
 DE 6.00 usec  
 TE 268.5 K

## F1 - Acquisition Parameters

ND0 1  
 TD 512  
 SF01 799.8107 MHz  
 FIDRES 21.486525 Hz  
 SW 13.755 ppm  
 FMODE undefined

## F2 - Processing parameters

SI 4096  
 SF 799.8064116 MHz  
 WDW QSI  
 SSB 2  
 LB 0.00 Hz  
 GB 0  
 PC 1.40

## F1 - Processing parameters

SI 2048  
 MC2 States  
 SF 799.8064116 MHz  
 WDW QSI  
 SSB 2  
 LB 0.00 Hz  
 GB 0

## 2D NMR plot parameters

CX2 15.00 cm  
 CX1 15.00 cm  
 F2PLO 11.002 ppm  
 F2LO 8799.72 Hz  
 F2PHI 5.498 ppm  
 F2HI 4397.67 Hz  
 F1PLO 11.000 ppm  
 F1LO 8797.87 Hz  
 F1PHI 5.500 ppm  
 F1HI 4398.94 Hz  
 F2PQCM 0.36693 ppm/cm  
 F2HZCM 293.47009 Hz/cm  
 F1PQCM 0.36667 ppm/cm  
 F1HZCM 293.26236 Hz/cm

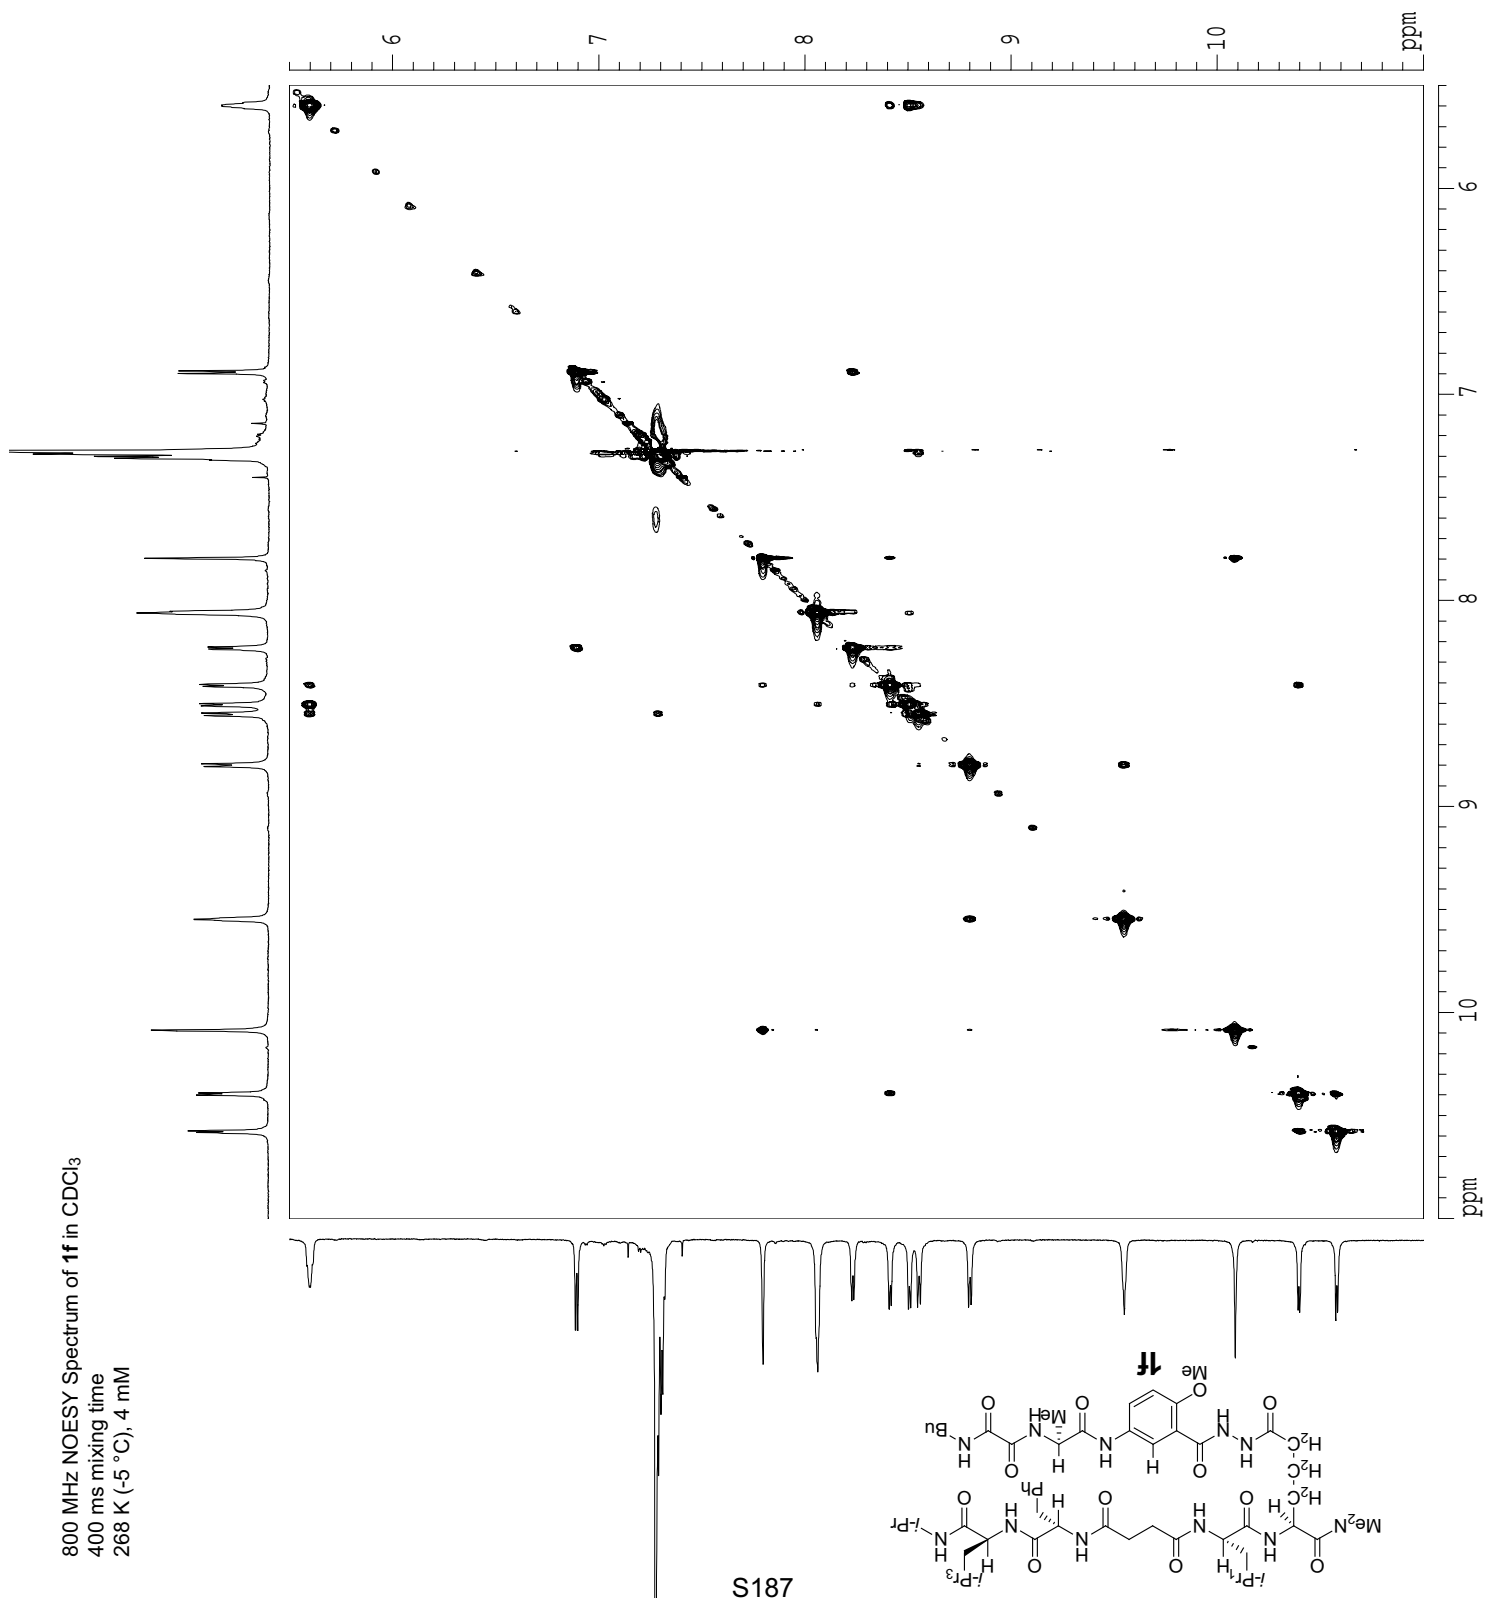

800 MHz NOESY Spectrum of **1f** in CDCl<sub>3</sub>  
 400 ms mixing time  
 268 K (-5 °C), 4 mM

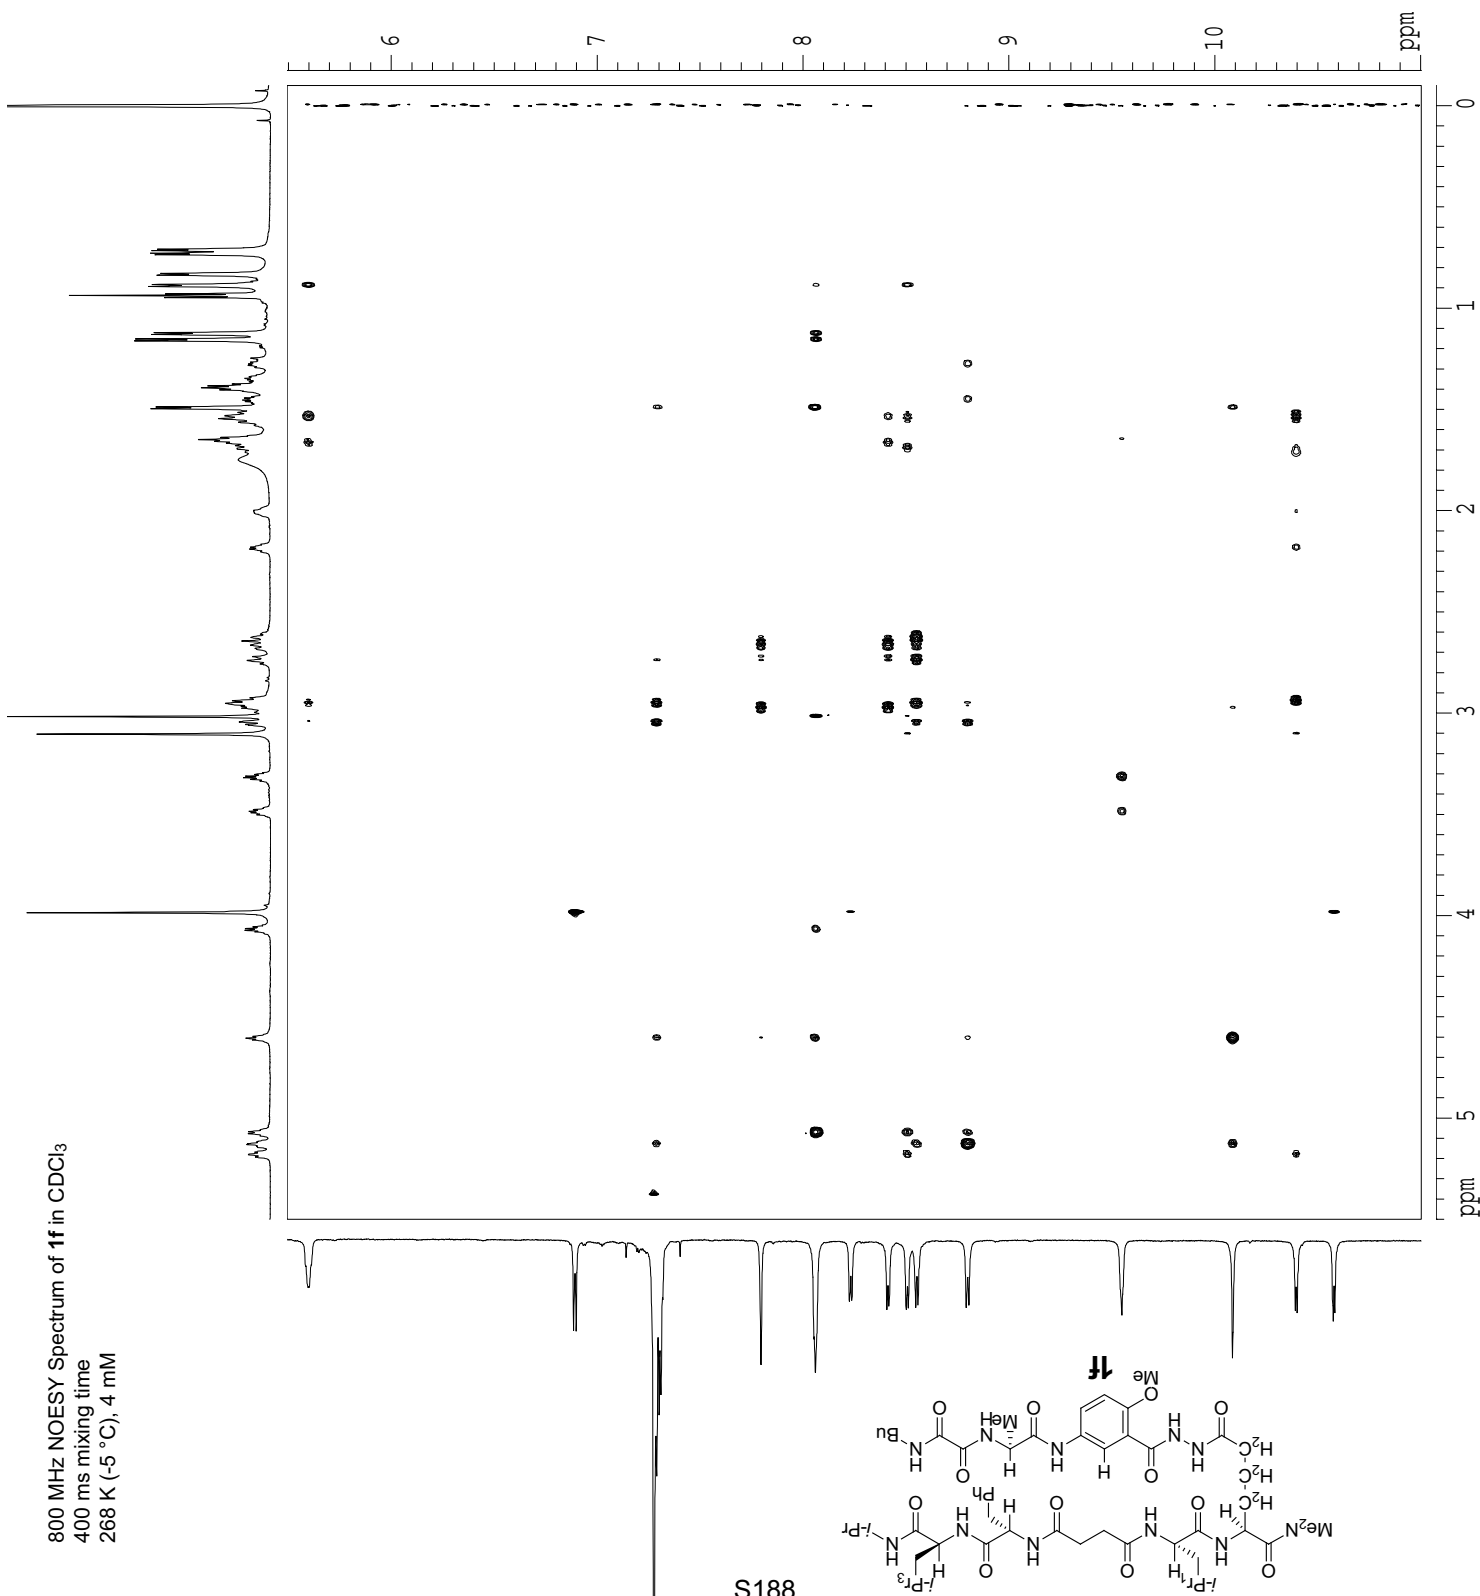

S188

Current Data Parameters  
 USER slevin  
 NAME SL-7-124-800-H  
 EXPNO 4  
 PROCNO 1

F2 - Acquisition Parameters  
 Date\_ 20061030  
 Time 0.00  
 INSTRUM varian  
 PROBHD 40:5mm broadband  
 PULPROG noesyh2o\_pfg\_800\_pln  
 TD 4096  
 SOLVENT CDCl3  
 NS 32  
 DS 64  
 SWH 11001.101 Hz  
 FIDRES 2.685816 Hz  
 AQ 0.1862132 sec  
 RG 128  
 DW 45.450 usec  
 DE 6.00 usec  
 TE 268.5 K

F1 - Acquisition parameters  
 ND0 1  
 TD 512  
 SFO1 799.8107 MHz  
 FIDRES 21.486525 Hz  
 SW 13.755 ppm  
 FMODE undefined

F2 - Processing parameters  
 SI 4096  
 SF 799.8064116 MHz  
 WDW QSI  
 SSB 2  
 LB 0.00 Hz  
 GB 0  
 PC 1.40

F1 - Processing parameters  
 SI 2048  
 MC2 States  
 SF 799.8064116 MHz  
 WDW QSI  
 SSB 2  
 LB 0.00 Hz  
 GB 0

2D NMR plot parameters  
 CX2 15.00 cm  
 CX1 15.00 cm  
 F2PLO 5.500 ppm  
 F2LO 4398.94 Hz  
 F2PHI -0.100 ppm  
 F2HI -79.98 Hz  
 F1PLO 11.002 ppm  
 F1LO 8799.72 Hz  
 F1PHI 5.495 ppm  
 F1HI 4394.99 Hz  
 F2PNCM 0.37333 ppm/cm  
 F2ZCM 298.59439 Hz/cm  
 F1PNCM 0.36715 ppm/cm  
 F1ZCM 293.64917 Hz/cm

## Selected NOEs

800 MHz NOESY Spectrum of **1f** in CDCl<sub>3</sub>  
 400 ms mixing time  
 268 K (-5 °C), 4 mM

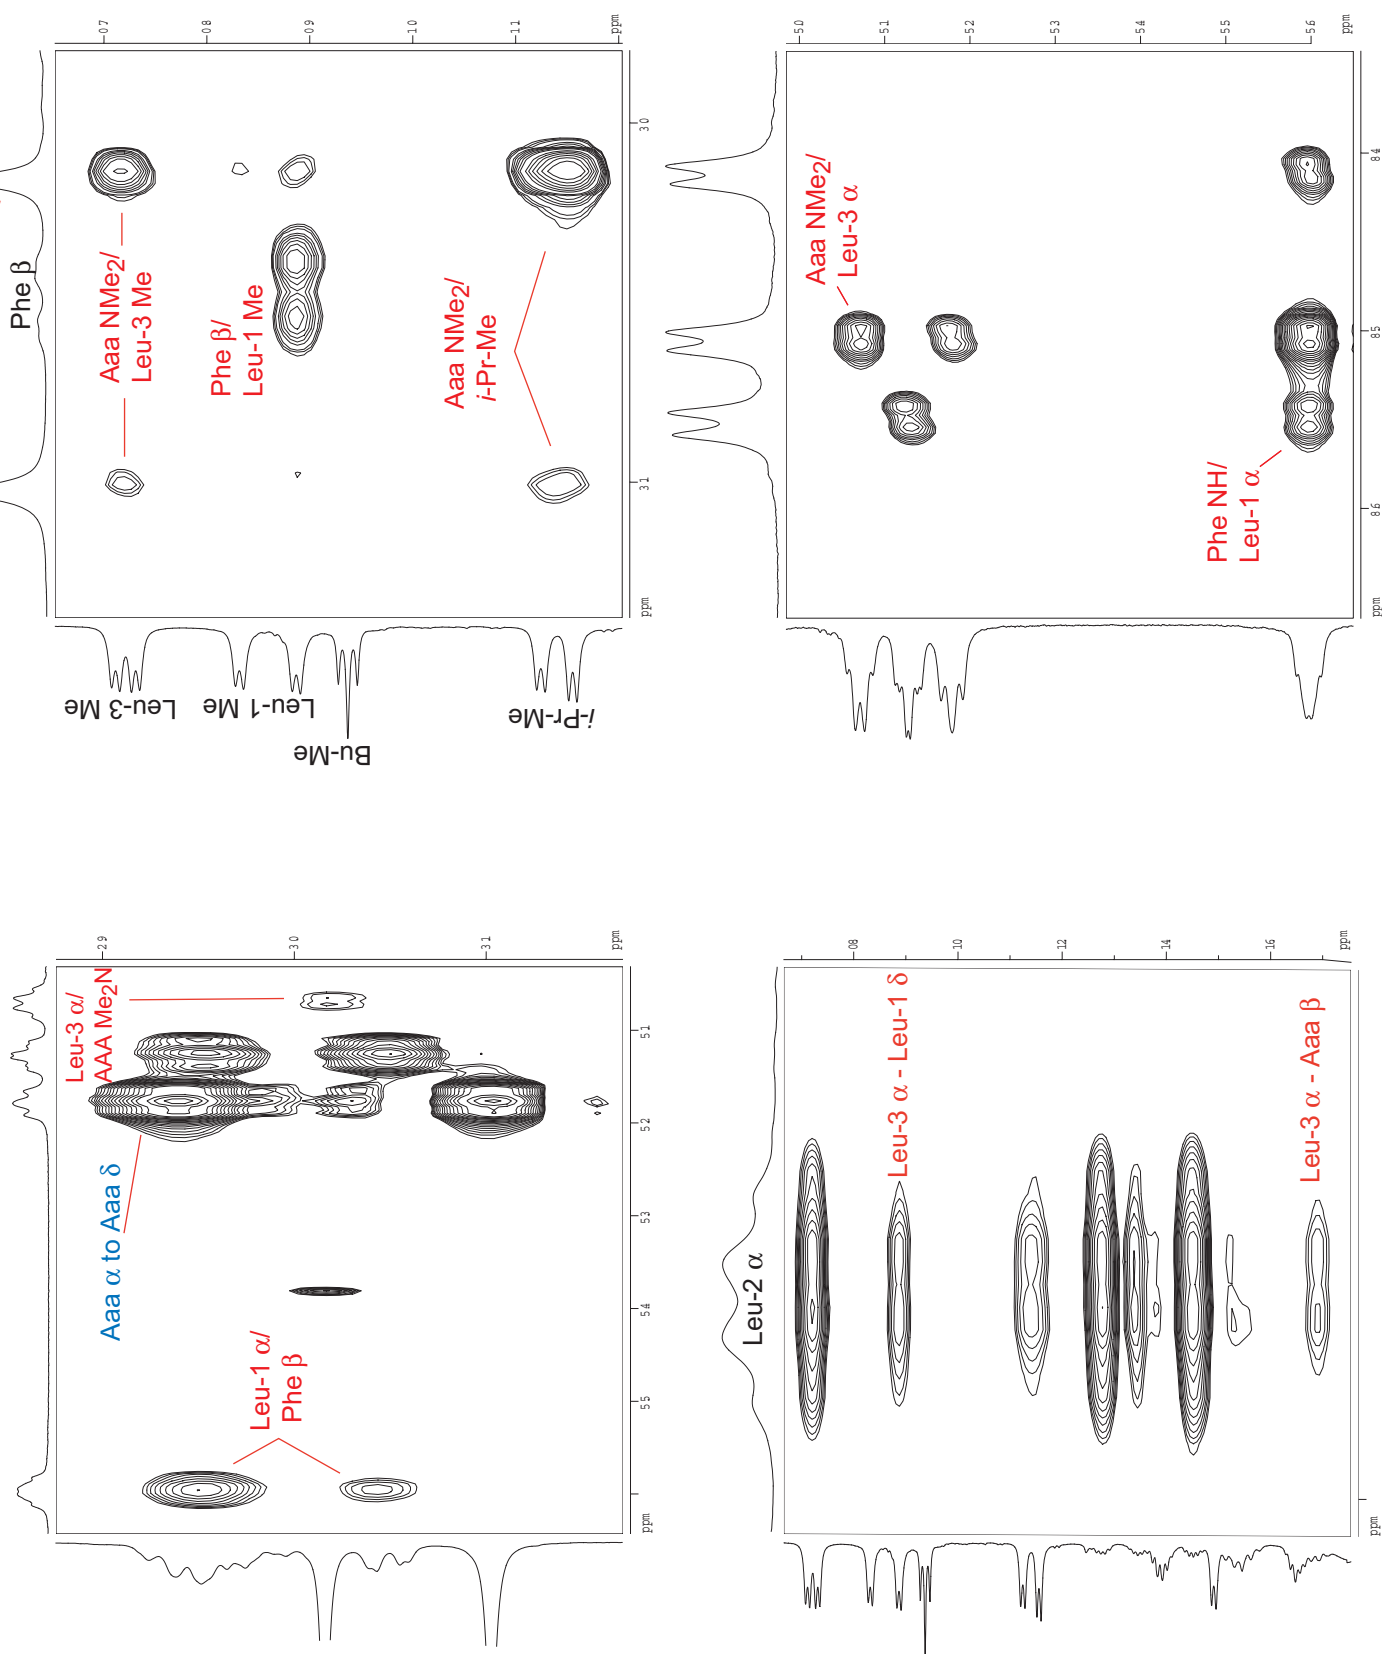

Spectroscopic DATA for the compound **2a**  
(3 mM, CDCl<sub>3</sub> 268K)

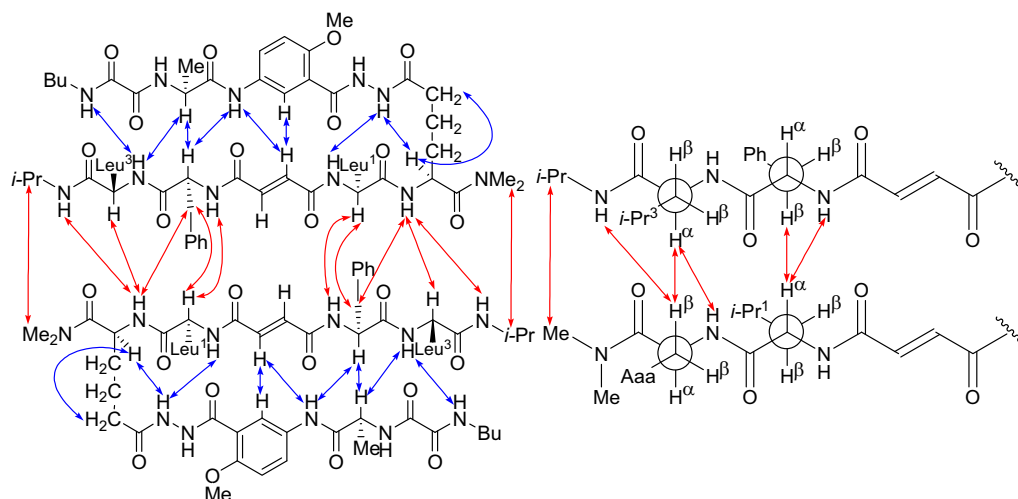

Key NOEs assigned as *intermolecular* are represented with red arrows.  
Key NOEs assigned as *intramolecular* are represented with blue arrows.

Key data for amino acids.

| Amino acid                        | H <sub>α</sub> Shift ppm | NH Shift ppm | <sup>3</sup> J <sub>NHα</sub> Hz |
|-----------------------------------|--------------------------|--------------|----------------------------------|
| Aaa                               | 5.20                     | 8.77         | 8.2                              |
| R <sub>1</sub> = Leu <sup>1</sup> | 5.80                     | 8.55         | 8.2                              |
| R <sub>2</sub> = Phe              | 5.20                     | 9.20         | 9.8                              |
| R <sub>3</sub> = Leu <sup>2</sup> | 5.05                     | 8.74         | broad                            |
| R <sub>4</sub> = Ala              | 4.50                     | 8.05         | broad                            |

Aminoacidic acid (Aaa) δ proton resonances.

*pro-R*: 2.85 ppm, t, (*J* = 12.0 Hz)

*pro-S*: 2.20 ppm, td, (*J*<sub>1</sub> = 11.5 Hz; *J*<sub>2</sub> = 7.0 Hz)

anisotropy = 0.65ppm

Key data for other NH protons.

| Proton          | NH Shift ppm | <i>J</i> Hz |
|-----------------|--------------|-------------|
| Ar-NH           | 10.20        | -           |
| Hydrazide Ar    | 10.45        | broad       |
| Hydrazide Aaa   | 10.33        | broad       |
| Bu-NH           | 9.53         | broad       |
| <i>i</i> -Pr-NH | 8.10         | 7.6         |

ESI MS *m/z* for C<sub>53</sub>H<sub>80</sub>N<sub>11</sub>O<sub>12</sub> [M+H]<sup>+</sup> calcd 1062.60, found 1062.48.

800 MHz <sup>1</sup>H NMR Spectrum of **2a** in CDCl<sub>3</sub>  
268 K (-5 °C), 3 mM

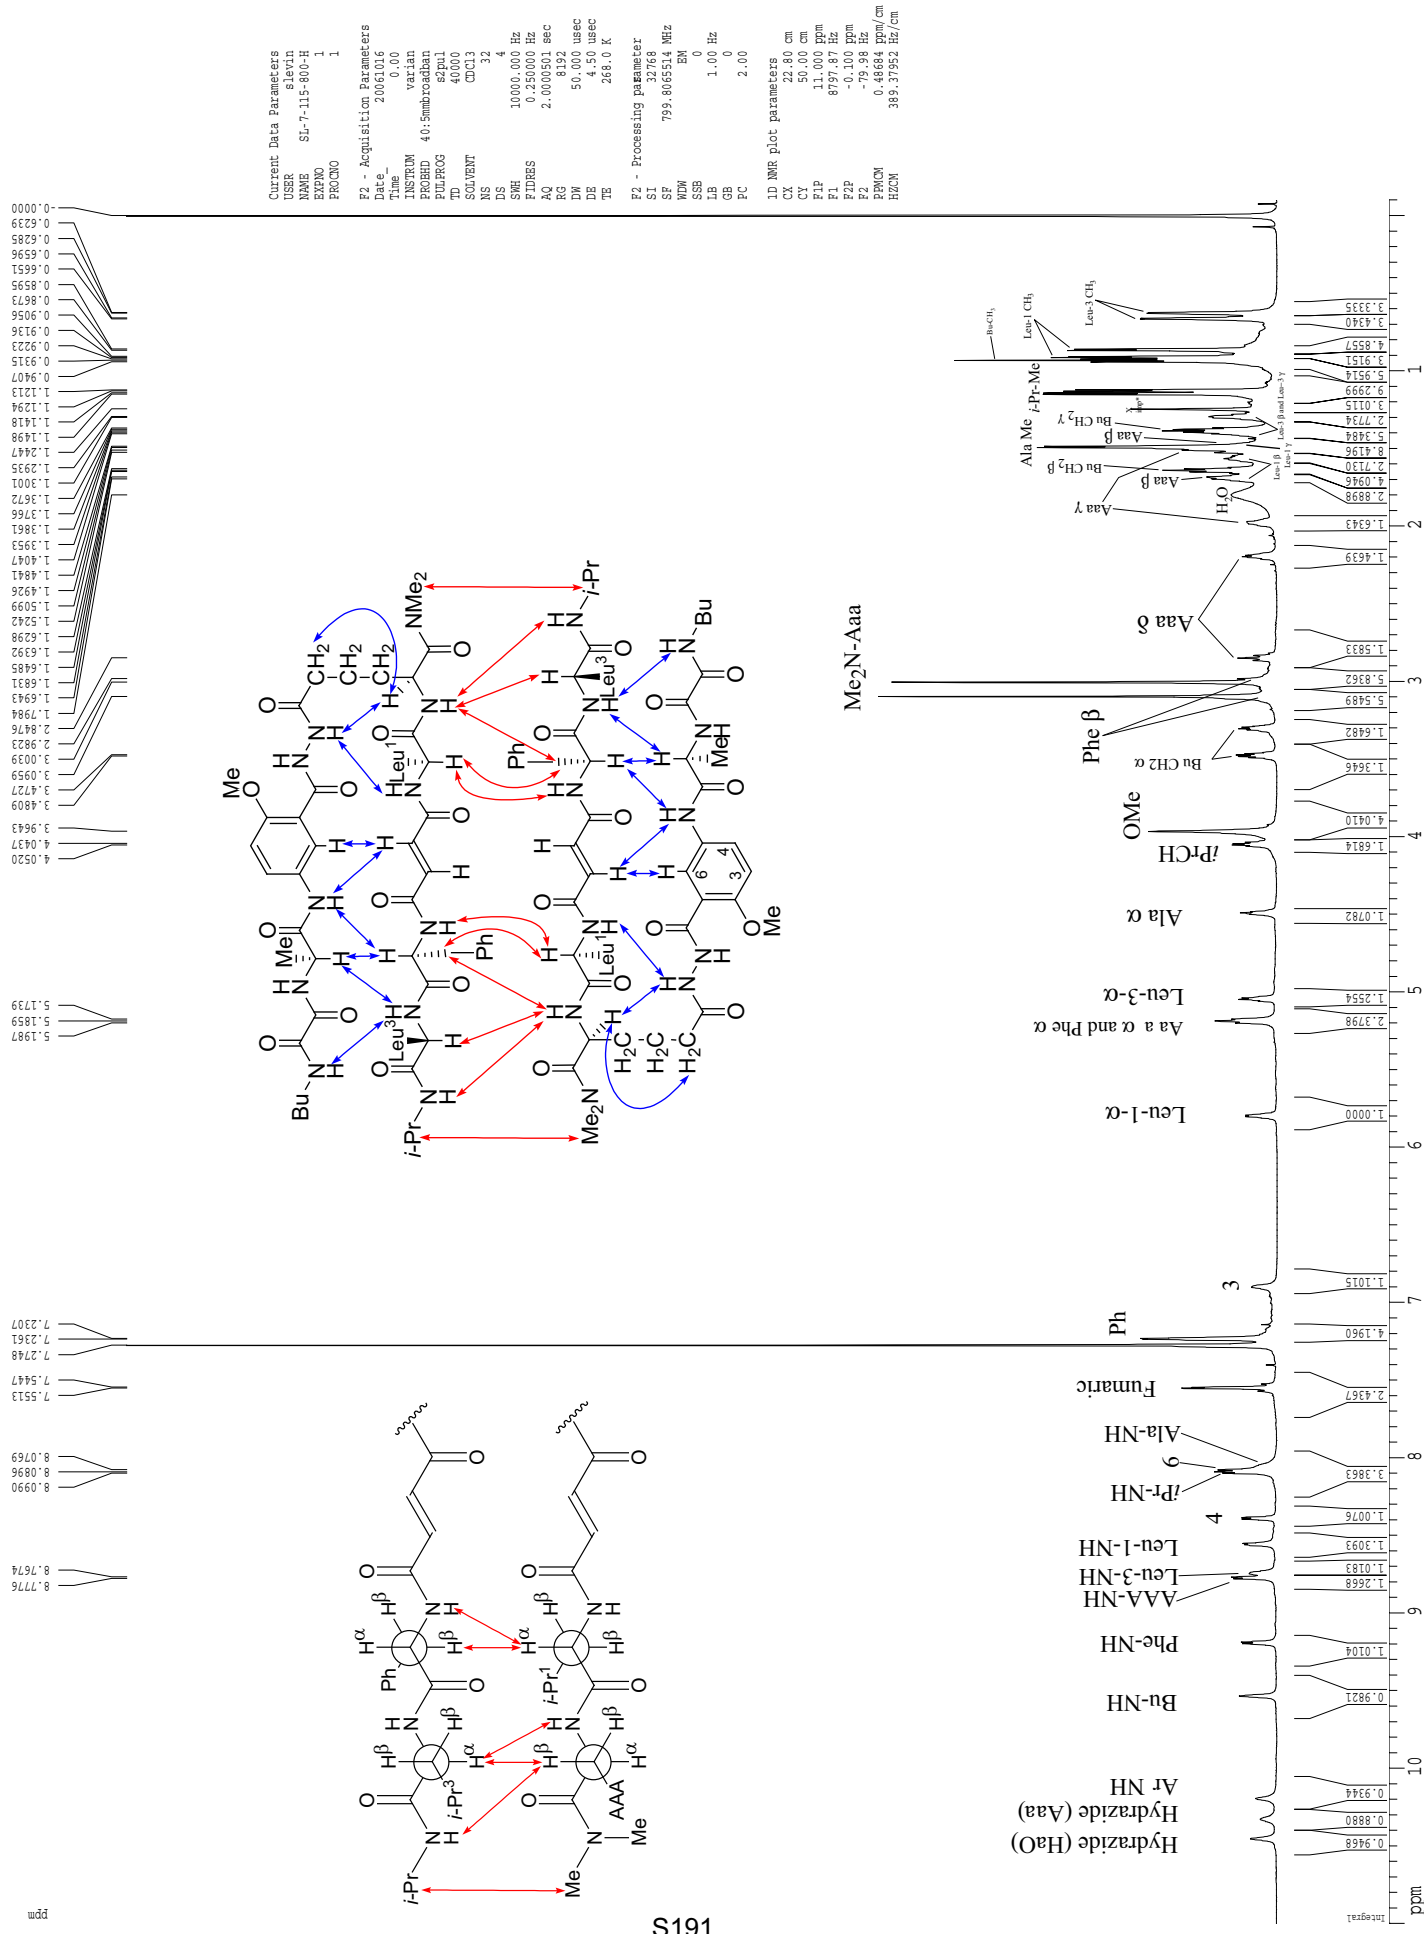

Supporting Information

Current Data Parameters  
 USER sleVIN  
 NAME SL-7-115-cr-600-268K-H  
 EXPNO 6  
 PROCNO 1

F2 - Acquisition Parameters

Date\_ 20061011  
 Time 19:39  
 INSTRUM av600  
 PROBHD 5 mm TBI IH/13  
 PULPROG cosy90pf  
 TD 1912  
 SOLVENT CDCl3  
 NS 8  
 DS 16  
 SWH 7211.539 Hz  
 FIDRES 3.771725 Hz  
 AQ 0.1326151 sec  
 RG 362  
 DW 69.333 usec  
 DE 6.00 usec  
 TE 268.0 K  
 d0 0.00000300 sec  
 d1 1.48689198 sec  
 d13 0.00000400 sec  
 d16 0.00020000 sec  
 INU 0.00013885 sec

==== CHANNEL f1 =====

NUC1 1H  
 P0 8.00 usec  
 P1 8.00 usec  
 PL1 -1.00 dB  
 SFO1 600.1334803 MHz

==== GRADIENT CHANNEL =====

GENAM1 SINE.100  
 GENAM2 SINE.100  
 GPZ1 10.00 %  
 GPZ2 10.00 %  
 P16 10000.00 usec

F1 - Acquisition Parameters

ND0 1  
 TD 256  
 SFO1 600.1335 MHz  
 FIDRES 28.132877 Hz  
 SW 12.001 ppm  
 PRMODE QF

F2 - Processing Parameters

SI 1024  
 SF 600.1300262 MHz  
 SINE  
 WDW 0  
 SSB 0  
 LB 0.00 Hz  
 GB 0  
 PC 1.00

F1 - Processing Parameters

SI 1024  
 MC2 QF  
 SF 600.1300262 MHz  
 SINE  
 WDW 0  
 SSB 0  
 LB 0.00 Hz  
 GB 0

2D NMR plot parameters

CY2 15.00 cm  
 CX1 15.00 cm  
 FZPLO 11.002 Fpm  
 FZLO 6602.60 Hz  
 FZPHI -0.111 ppm  
 FZHI -66.67 Hz  
 F1PLO 11.007 ppm  
 F1LO 6605.48 Hz  
 F1PHI -0.103 ppm  
 F1HI -62.02 Hz  
 F2PDMCM 0.74087 Fpm/cm  
 F2HZCM 444.61761 Hz/cm  
 F1PDMCM 0.74067 Fpm/cm  
 F1HZCM 444.49945 Hz/cm

600 MHz gCOSY Spectrum of **2a** in CDCl<sub>3</sub>  
 268 K (-5 °C), 2 mM

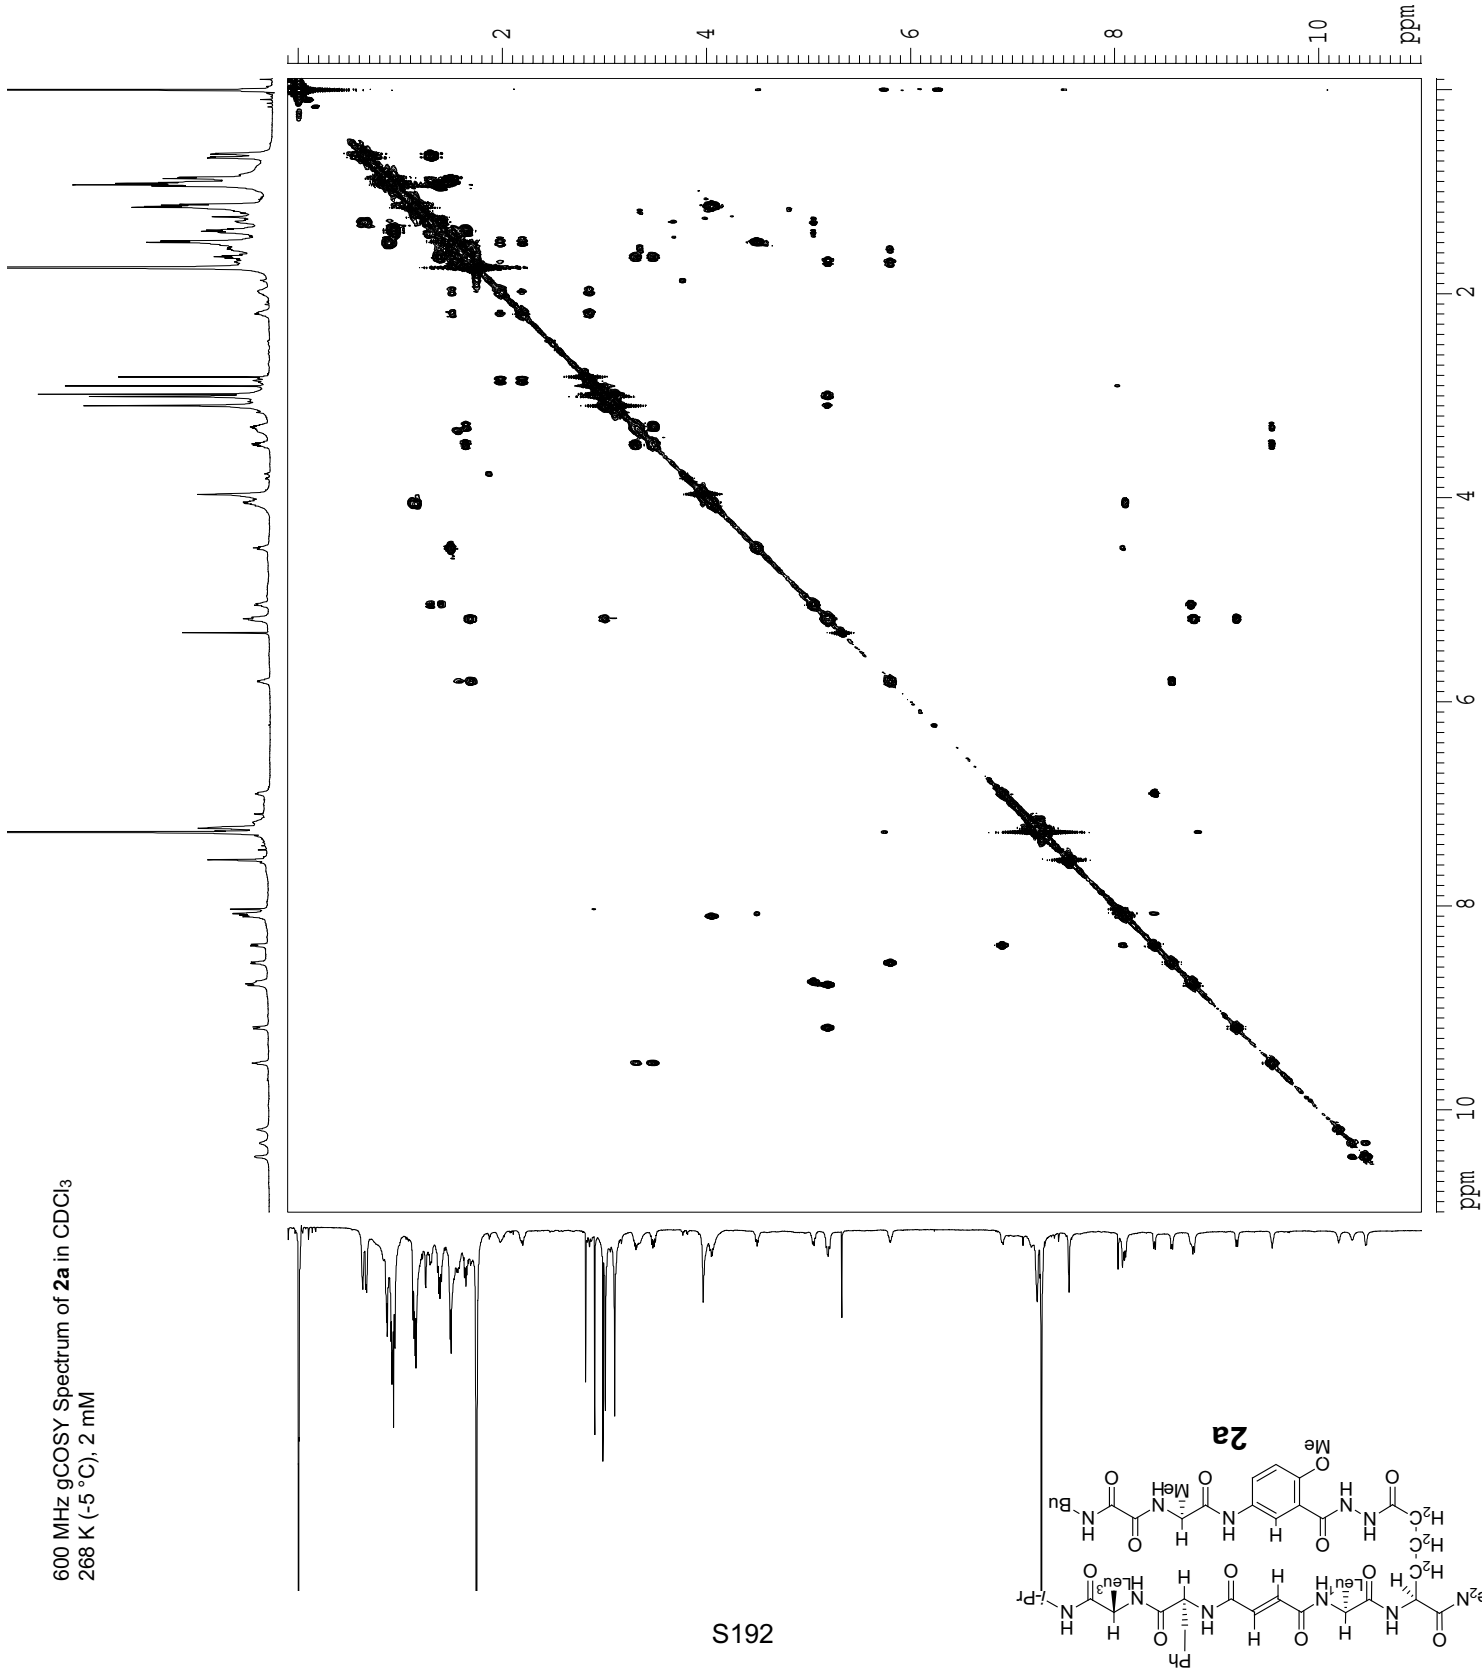



Current Data Parameters  
 USER slevin  
 NAME SL-7-115-cr-600-268K-H  
 EXPNO 6  
 PROCNO 1

## F2 - Acquisition Parameters

Date\_ 20061011  
 Time 19:39  
 INSTRUM av600  
 PROBED 5 mm TBI 1H/13  
 PULPROG cosygpgf  
 TD 1912  
 SOLVENT CDCl3  
 NS 8  
 DS 16  
 SWH 7211.539 Hz  
 FIDRES 3.771725 Hz  
 AQ 0.1326153 sec  
 RG 362  
 DW 69.333 usec  
 DE 6.00 usec  
 TE 268.0 K  
 d0 0.0000300 sec  
 d1 1.48689198 sec  
 d13 0.0000400 sec  
 d16 0.0002000 sec  
 INO 0.00013885 sec

## ===== CHANNEL f1 =====

NUC1 1H  
 P0 8.00 usec  
 PL 8.00 usec  
 PL1 -1.00 dB  
 SF01 600.1334808 MHz

## ===== GRADIENT CHANNEL =====

GPM1 SINE.100  
 GPM2 SINE.100  
 GPZ1 10.00 %  
 GPZ2 10.00 %  
 PL6 1000.00 usec

## F1 - Acquisition parameters

ND0 1  
 TD 256  
 SF01 600.1335 MHz  
 FIDRES 28.132877 Hz  
 SW 12.001 ppm  
 PHMODE QF

## F2 - Processing parameters

SI 1.024  
 SF 600.1300262 MHz  
 SINE SINE  
 WDW 0  
 SSB 0  
 LB 0.00 Hz  
 GB 0  
 PC 1.00

## F1 - Processing parameters

SI 1.024  
 MC2 QF  
 SF 600.1300262 MHz  
 SINE SINE  
 WDW 0  
 SSB 0  
 LB 0.00 Hz  
 GB 0

## 2D NMR plot parameters

CV2 15.00 cm  
 CX1 15.00 cm  
 F2PLO 5.500 ppm  
 F2LO 3300.72 Hz  
 F2PHI -0.100 ppm  
 F2HT -60.01 Hz  
 F1PLO 5.500 ppm  
 F1LO 3300.72 Hz  
 F1PHI -0.100 ppm  
 F1HT -60.01 Hz  
 F2PPMCM 0.37333 ppm/cm  
 F2HZCM 224.04854 Hz/cm  
 F1PPMCM 0.37333 ppm/cm  
 F1HZCM 224.04854 Hz/cm

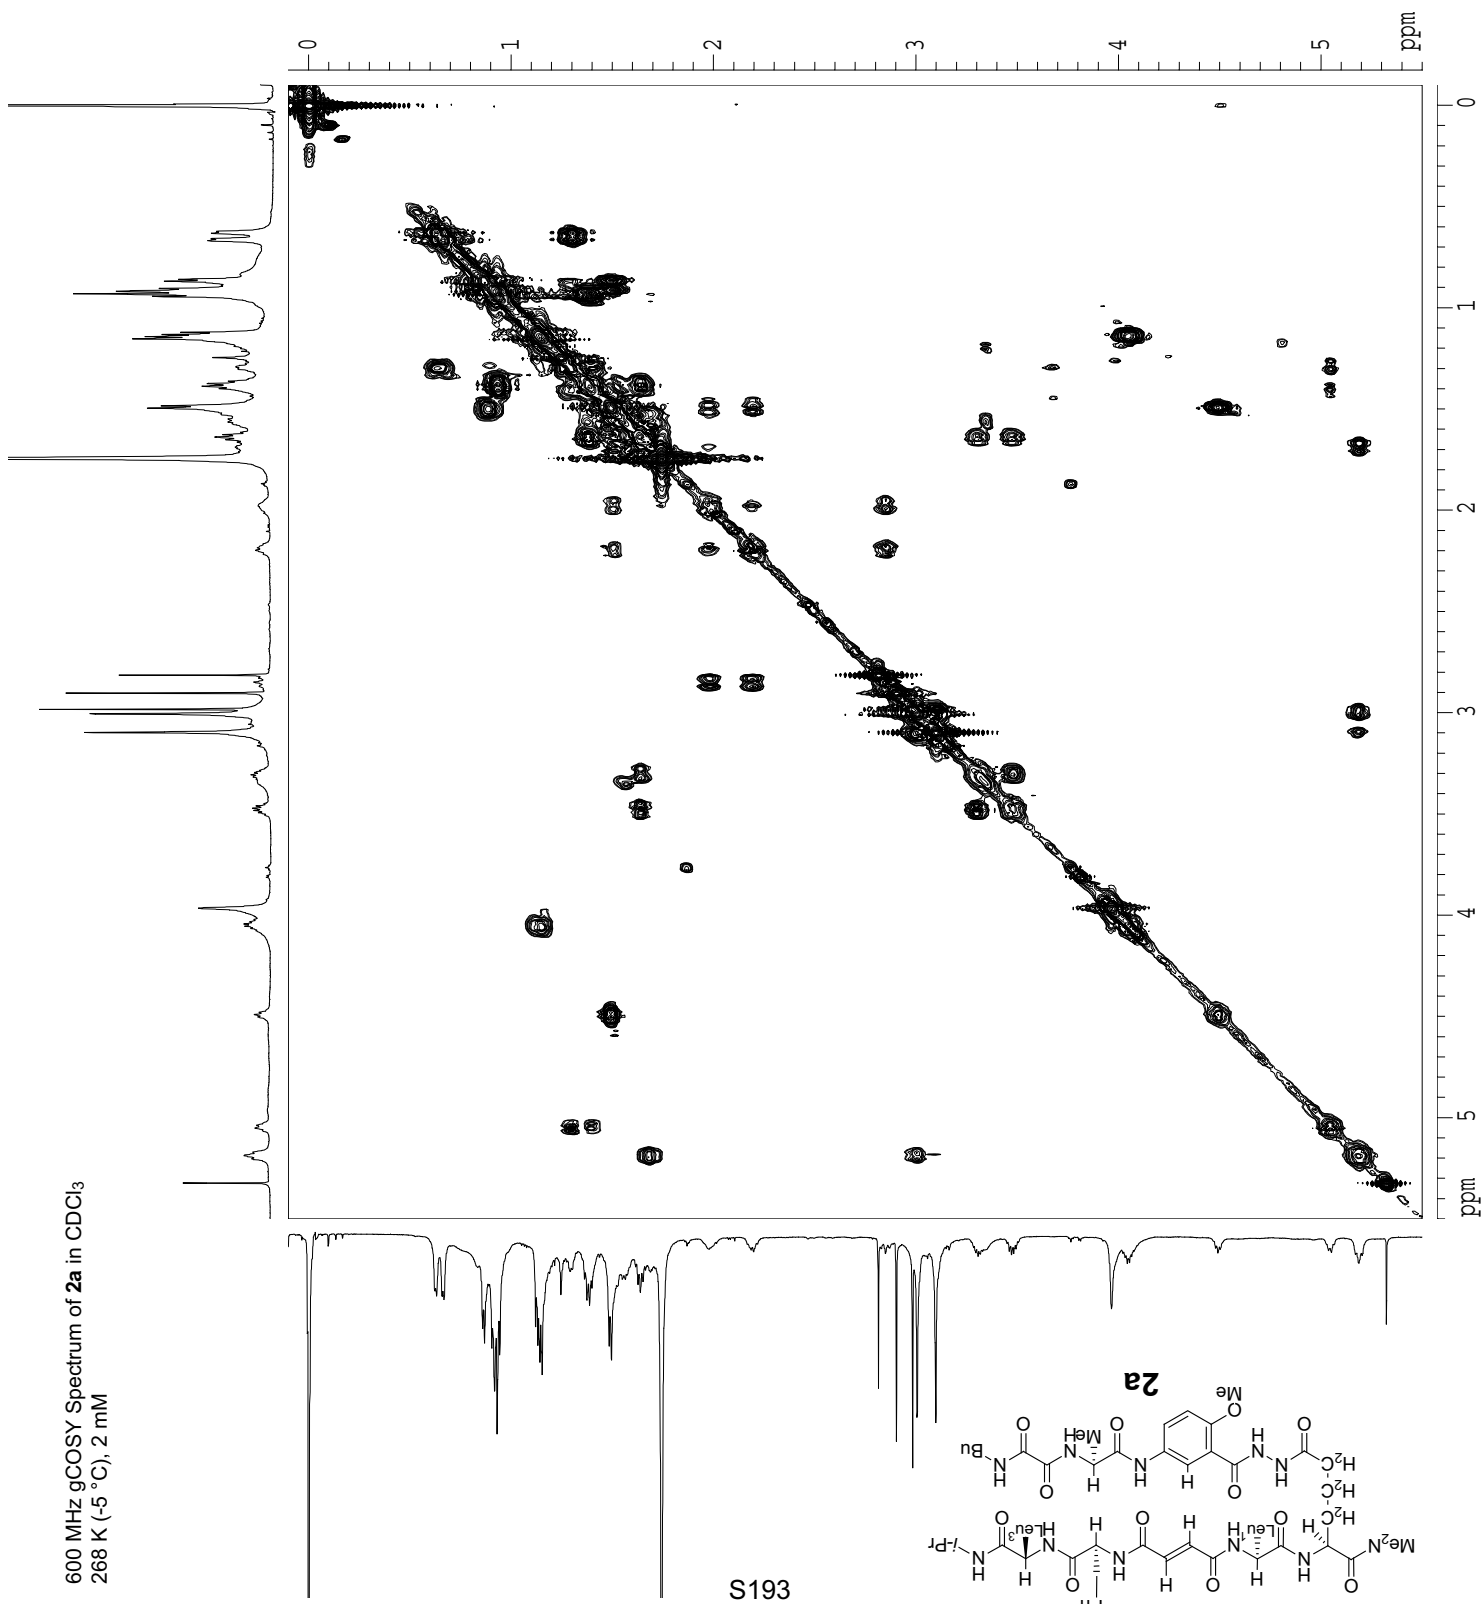

Supporting Information

S. Levin and J. S. Nowick

Current Data Parameters  
 USER slevin  
 NAME SL-7-115-cr-600-268K-H  
 EXPNO 6  
 PROCNO 1

F2 - Acquisition Parameters

Date\_ 20061011  
 Time\_ 19:39  
 INSTRUM av600  
 PROHD 5 mm TBI IH/13  
 PULPROG cosyppf  
 TD 1912  
 SOLVENT CDCl3  
 NS 8  
 DS 16  
 SWH 7211.539 Hz  
 FIDRES 3.771725 Hz  
 AQ 0.1326153 sec  
 RG 362  
 DW 69.333 usec  
 DE 6.00 usec  
 TE 268.0 K  
 d0 0.0000300 sec  
 d1 1.48689198 sec  
 d13 0.0000400 sec  
 d16 0.0002000 sec  
 INO 0.0001385 sec

==== CHANNEL f1 =====

NUC1 1H  
 P0 8.00 usec  
 PL 8.00 usec  
 PL1 -1.00 dB  
 SFO1 600.1334808 MHz

==== GRADIENT CHANNEL =====

GENAM1 SINE.100  
 GENAM2 SINE.100  
 GFZ1 10.00 %  
 GFZ2 10.00 %  
 PL6 1000.00 usec

F1 - Acquisition parameters

ND0 1  
 TD 256  
 SFO1 600.1335 MHz  
 FIDRES 28.132877 Hz  
 SW 12.001 ppm  
 PRMODE QF

F2 - Processing parameters

SI 1024  
 SF 600.1300262 MHz  
 NDW SINE  
 SSB 0  
 LB 0.00 Hz  
 GB 0  
 PC 1.00

F1 - Processing parameters

SI 1024  
 MC2 QF  
 SF 600.1300262 MHz  
 NDW SINE  
 SSB 0  
 LB 0.00 Hz  
 GB 0

2D NMR plot parameters

CX2 15.00 cm  
 CX1 15.00 cm  
 F2PLO 11.000 ppm  
 FZLO 6601.43 Hz  
 FZPHI 5.500 ppm  
 F3PHI 3300.72 Hz  
 F1PLO 5.500 ppm  
 F1LO 3300.72 Hz  
 F1PHI -0.103 ppm  
 FIHI -62.01 Hz  
 F2PDMCM 0.36667 ppm/cm  
 F2HZCM 220.04767 Hz/cm  
 F1PDMCM 0.37356 ppm/cm  
 F1HZCM 224.18199 Hz/cm

600 MHz gCOSY Spectrum of **2a** in CDCl<sub>3</sub>  
 268 K (-5 °C), 2 mM

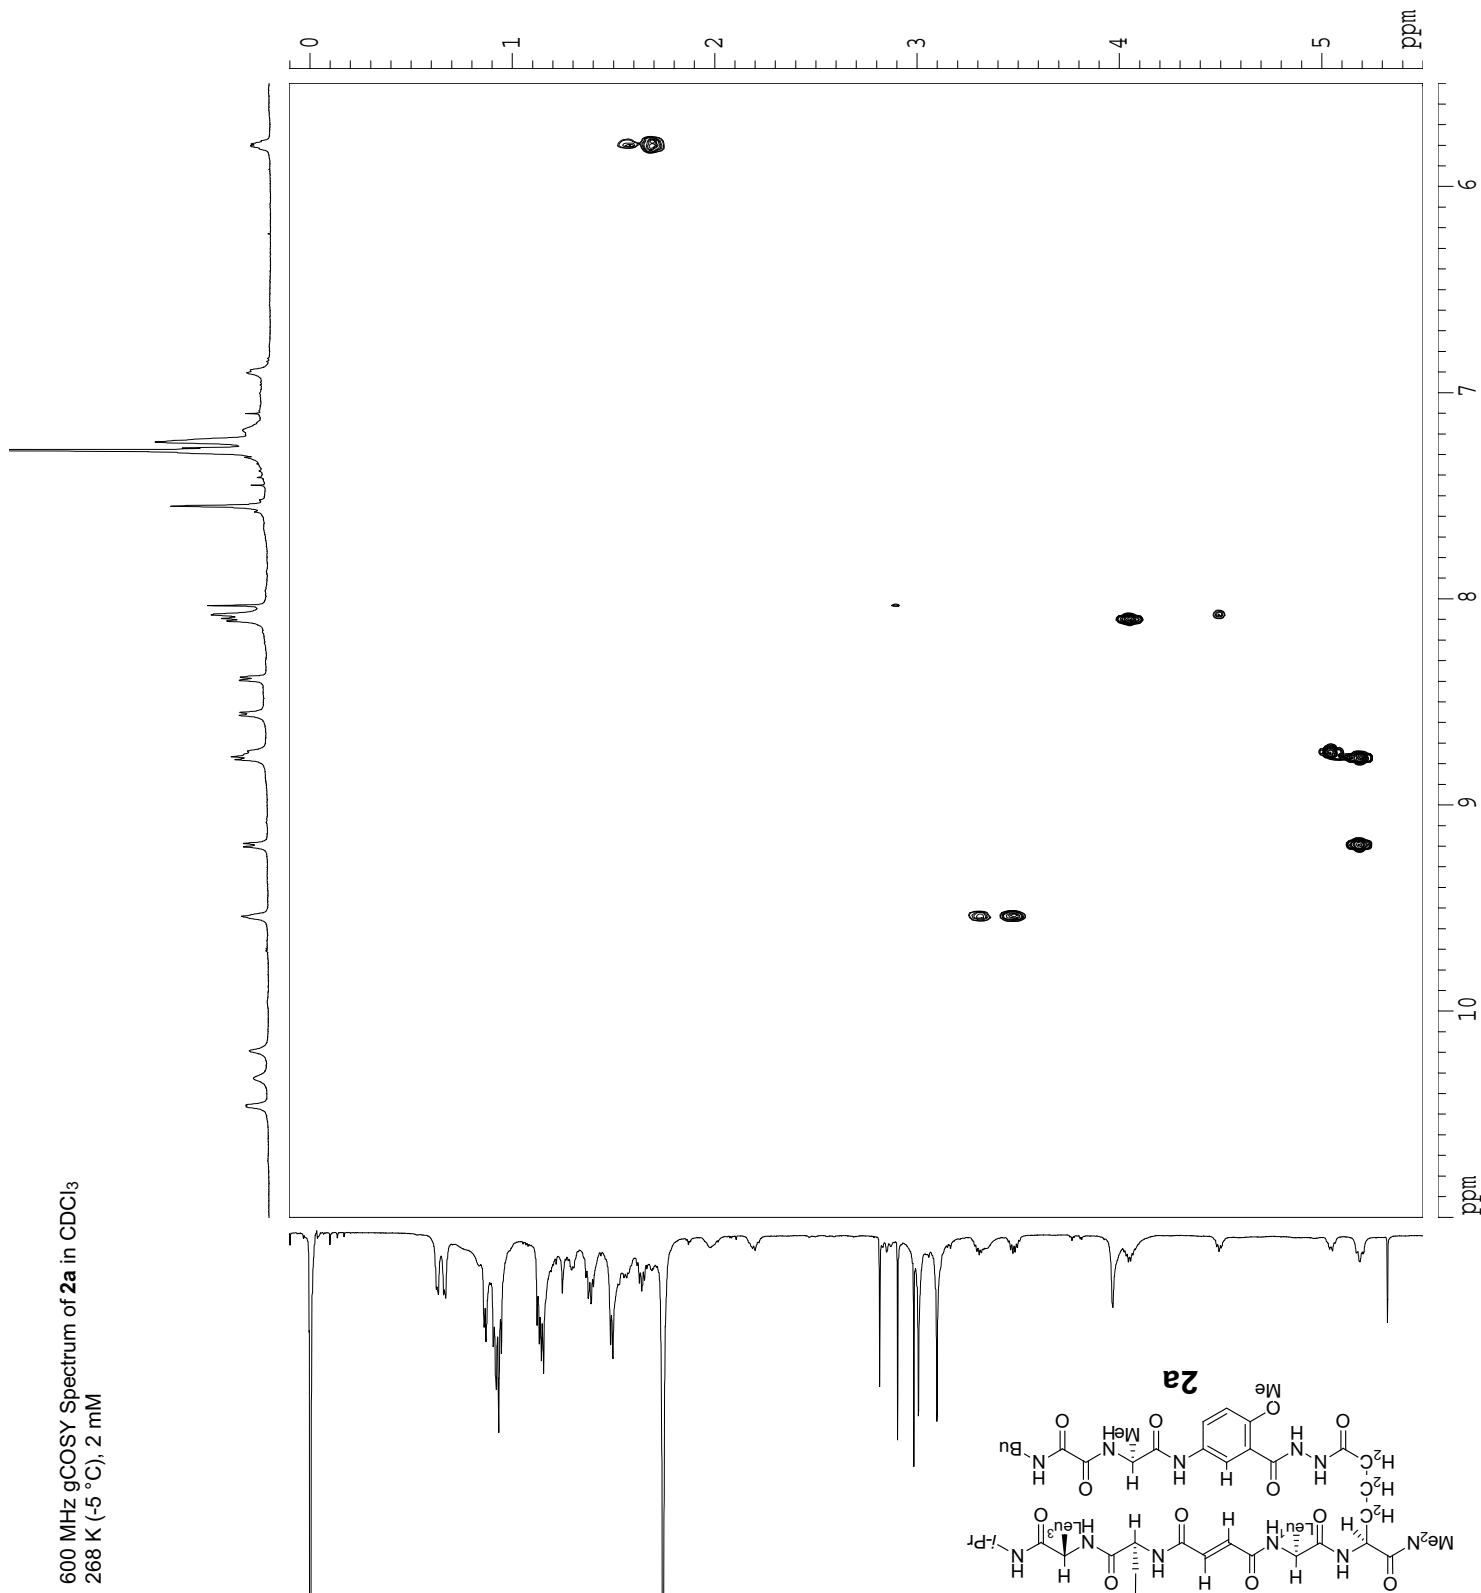

Current Data Parameters  
 USER slevin  
 NAME SJ-7-115-cr-600-268K-H  
 EXPNO 6  
 PROCNO 1

## F2 - Acquisition Parameters

Date 20061011  
 Time 19.39  
 INSTRUM av600  
 PROBHD 5 mm TBI 1H/13  
 PULPROG cosygpcf  
 TD 1312  
 SOLVENT CDCl3  
 NS 8  
 DS 16  
 SWH 7211.539 Hz  
 FIDRES 3.771725 Hz  
 AQ 0.1326153 sec  
 RG 362  
 DW 69.333 usec  
 DE 6.00 usec  
 TE 288.0 K  
 d0 0.0000300 sec  
 d1 1.48689139 sec  
 d13 0.0000400 sec  
 d16 0.0002000 sec  
 INO 0.00013885 sec

## \*\*\*\*\* CHANNEL f1 \*\*\*\*\*

NUC1 <sup>1</sup>H  
 P0 8.00 usec  
 P1 8.00 usec  
 PL1 -1.00 dB  
 SFO1 600.1334808 MHz

## \*\*\*\*\* GRADIENT CHANNEL \*\*\*\*\*

GENAM1 SINE.100  
 GENAM2 SINE.100  
 GPZ1 10.00 %  
 GPZ2 10.00 %  
 PL6 1000.00 usec

## F1 - Acquisition parameters

ND0 1  
 TD 256  
 SFO1 600.1335 MHz  
 FIDRES 28.132877 Hz  
 SW 12.001 Epm  
 FMODE QF

## F2 - Processing parameters

SI 1024  
 SF 600.1300262 MHz  
 NQW SINE  
 SSB 0  
 LB 0.00 Hz  
 GB 0  
 PC 1.00

## F1 - Processing parameters

SI 1024  
 MC2 QF  
 SF 600.1300262 MHz  
 NQW SINE  
 SSB 0  
 LB 0.00 Hz  
 GB 0

## 2D NMR plot parameters

CX2 15.00 cm  
 CX1 15.00 cm  
 F2PLO 11.002 ppm  
 F2LO 6602.60 Hz  
 F2PHI 5.488 ppm  
 F2HL 3299.66 Hz  
 F1PLO 11.000 ppm  
 F1LO 6601.43 Hz  
 F1PHI 5.500 ppm  
 F1HI 3300.72 Hz  
 F2PPMCM 0.36691 ppm/cm  
 F2HZCM 220.19606 Hz/cm  
 F1PPMCM 0.36667 ppm/cm  
 F1HZCM 220.04767 Hz/cm

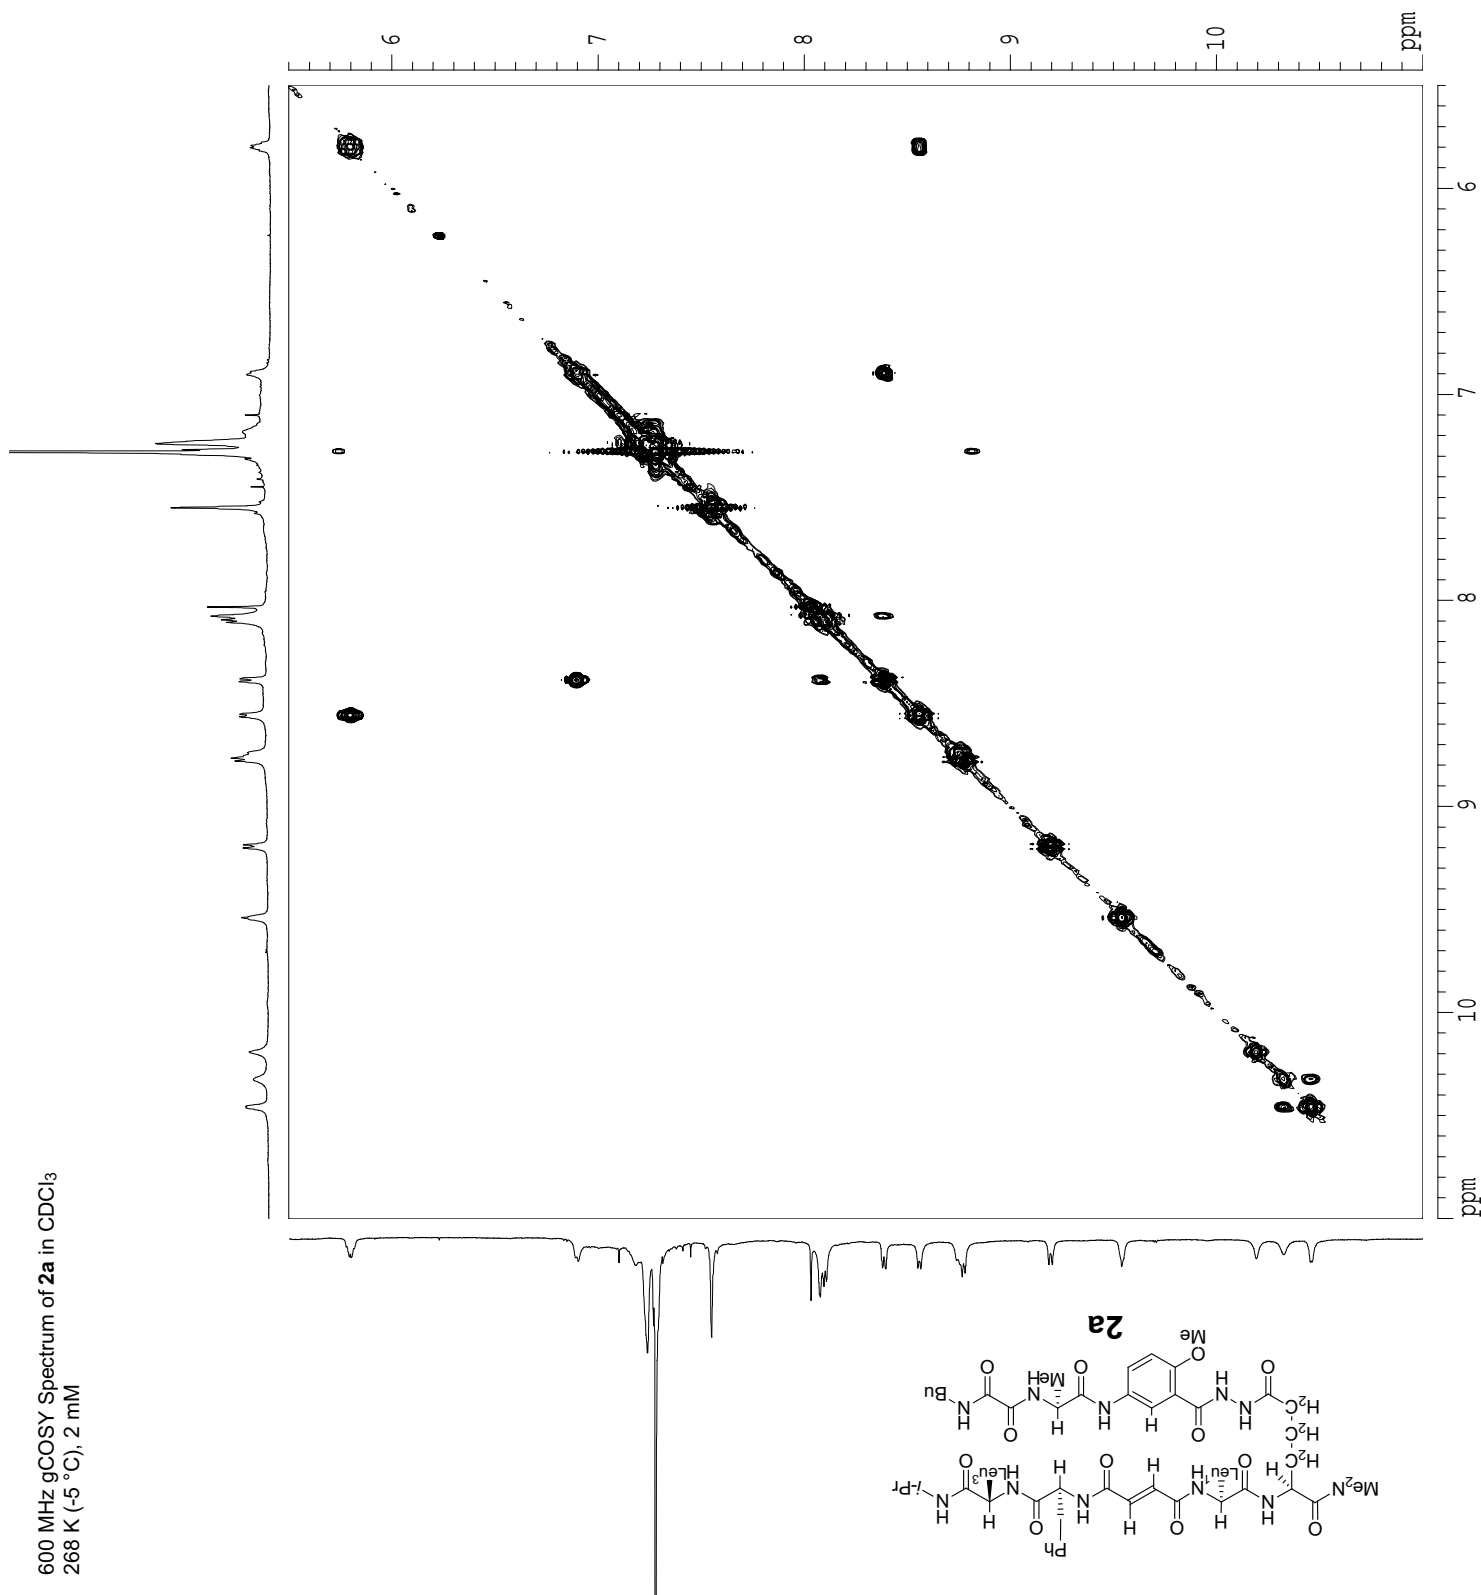

Supporting Information

S. Levin and J. S. Nowick

Current Data Parameters  
 USER sievin  
 NAME SL-7-115-cr-600-268K-H  
 EXPNO 6  
 PROCNO 1

F2 - Acquisition Parameters  
 Date\_ 20061011  
 Time 19.39

INSTRUM av600  
 PROBHD 5 mm TBI IH/13  
 PULPROG cosy90pf  
 TD 1912  
 SOLVENT CDCl3  
 NS 8  
 DS 16  
 SWH 7211.538 Hz  
 FIDRES 3.771725 Hz  
 AQ 0.1326151 sec  
 RG 362  
 DW 69.333 usec  
 DE 6.00 usec  
 TE 268.0 K  
 d0 0.0000300 sec  
 d1 1.48689198 sec  
 d13 0.0000300 sec  
 d16 0.0002000 sec  
 IN0 0.00013885 sec

===== CHANNEL f1 =====  
 NUC1 1H  
 P0 8.00 usec  
 PL 8.00 usec  
 PL1 -1.00 dB  
 SFO1 600.1334808 MHz

===== GRADIENT CHANNEL =====  
 GENAM1 SINE.100  
 GENAM2 SINE.100  
 GFZ1 10.00 %  
 GFZ2 10.00 %  
 P16 10000.00 usec

F1 - Acquisition Parameters  
 ND0 1  
 TD 256  
 SFO1 600.1335 MHz  
 FIDRES 28.132877 Hz  
 SW 12.001 ppm  
 PRMODE QF

F2 - Processing Parameters  
 SI 1024  
 SF 600.1300262 MHz  
 SINE  
 NDUW 0  
 SSB 0  
 LB 0.00 Hz  
 GB 0  
 PC 1.00

F1 - Processing Parameters  
 SI 1024  
 MC2 QF  
 SF 600.1300262 MHz  
 SINE  
 NDUW 0  
 SSB 0  
 LB 0.00 Hz  
 GB 0

2D NMR plot parameters  
 CV2 15.00 cm  
 CX1 15.00 cm  
 F2PLO 5.500 ppm  
 F2ALO 3300.72 Hz  
 F2PHI -0.100 ppm  
 F2HI -60.01 Hz  
 F1PLO 11.007 ppm  
 F1LO 6605.48 Hz  
 F1PHI 5.493 ppm  
 F1HI 3299.86 Hz  
 F2PPMCM 0.37333 ppm/cm  
 F2HZCM 224.04854 Hz/cm  
 F1PPMCM 0.36721 ppm/cm  
 F1HZCM 220.37421 Hz/cm

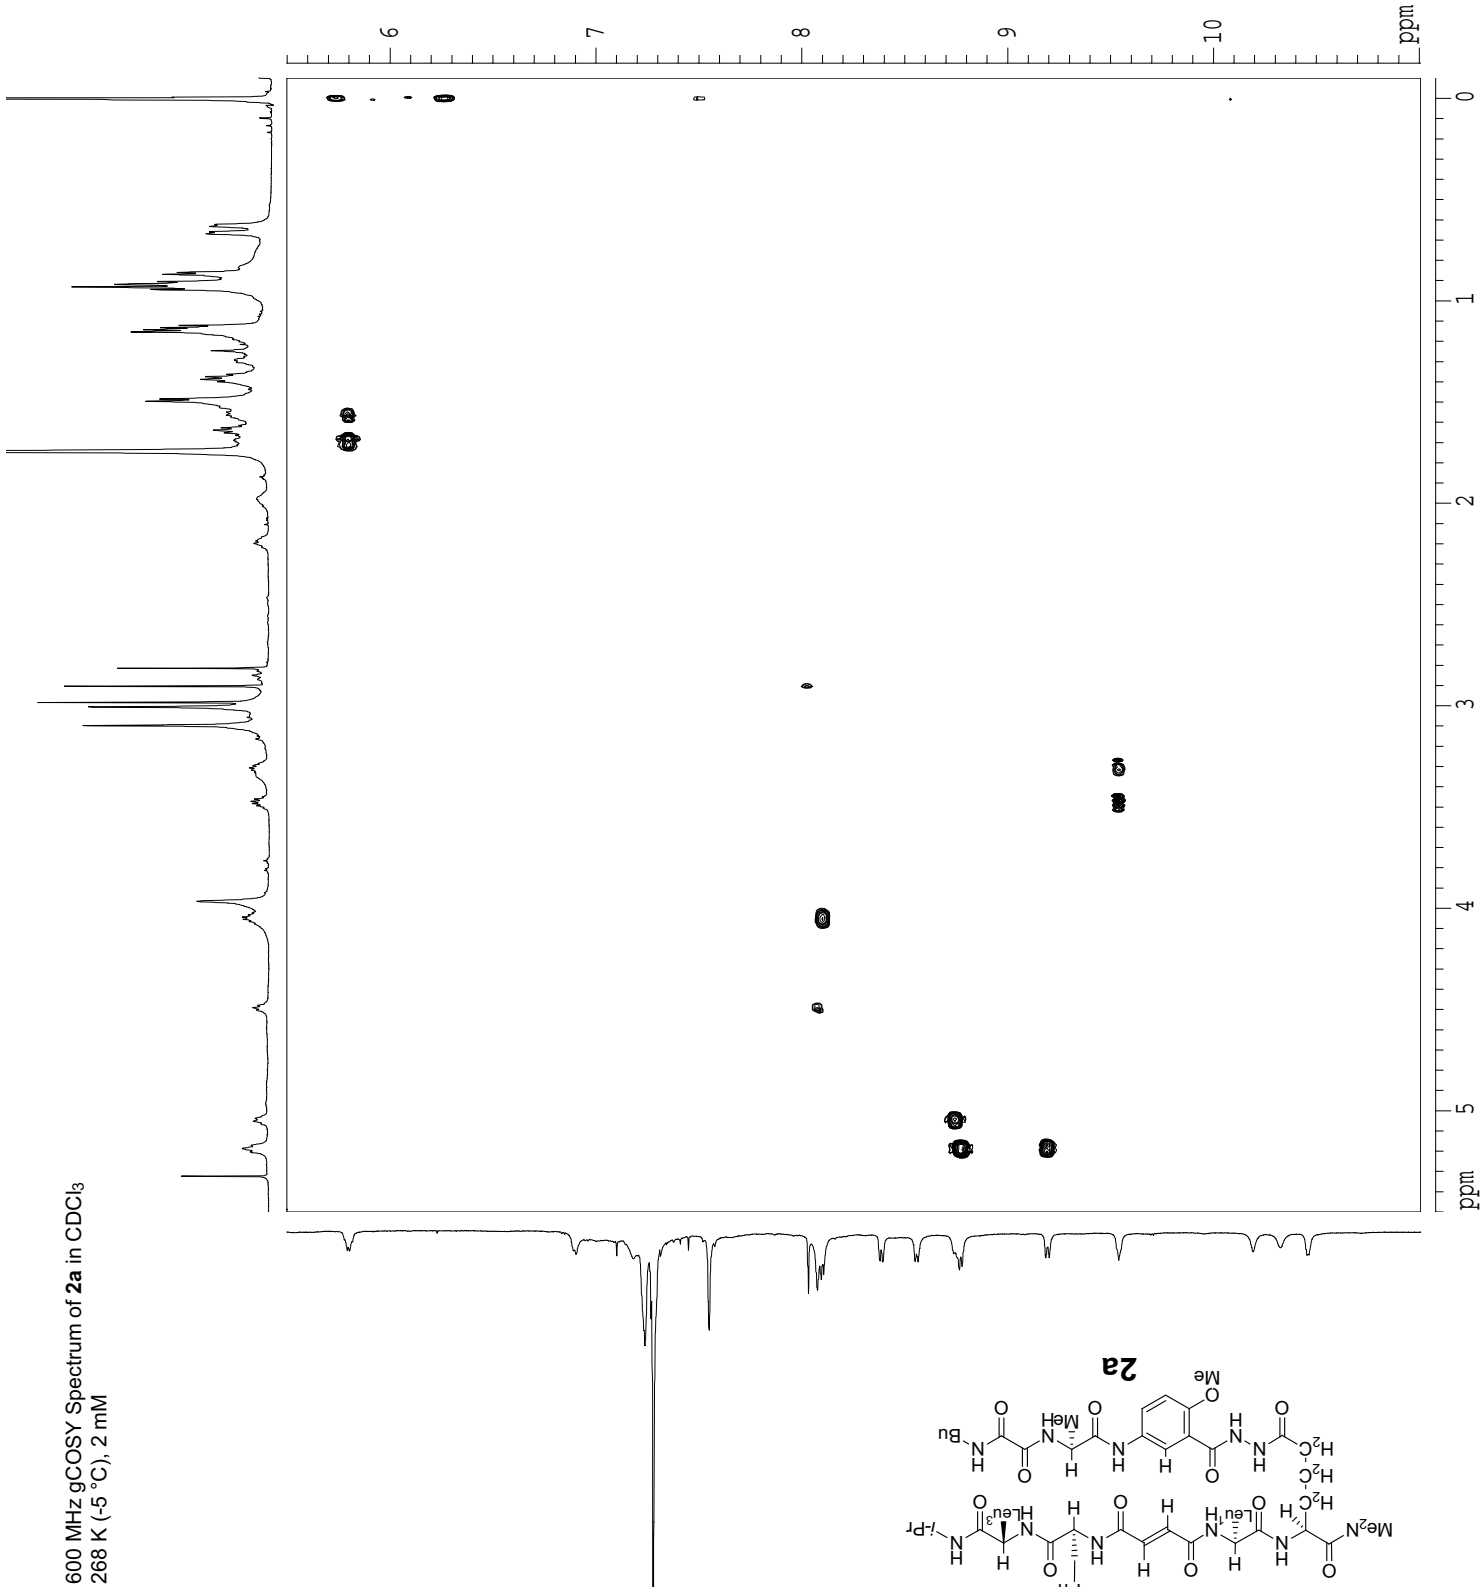

600 MHz gCOSY Spectrum of **2a** in CDCl<sub>3</sub>  
 268 K (-5 °C), 2 mM

Supporting Information

Current Data Parameters

USER slevin  
 NAME SL-7-115-800-H  
 EXPNO 2  
 PROCNO 1

F2 - Acquisition Parameters

Date\_ 20061016  
 Time\_ 0.00  
 INSTRUM varian  
 PROBHD 40:5mmBroadban  
 PULPROG wgtocsy\_bn  
 TD 4096  
 SOLVENT CDCl3  
 NS 32  
 DS 64  
 SWH 10000.000 Hz  
 FIDRES 2.441406 Hz  
 AQ 0.2048500 sec  
 RG 287.4  
 DW 50.000 usec  
 DE 6.00 usec  
 TE 268.5 K

F1 - Acquisition parameters

ND0 1  
 TD 256  
 SFO1 799.811 MHz  
 FIDRES 39.062500 Hz  
 SW 12.503 ppm  
 F1MODE undefined

F2 - Processing parameters

SI 2048  
 SF 799.8065514 MHz  
 WDW QSIINE  
 SSB 2  
 LB 0.00 Hz  
 GB 0  
 PC 1.40

F1 - Processing parameters

SI 2048  
 MC2 States  
 SF 799.8065514 MHz  
 WDW QSIINE  
 SSB 2  
 LB 0.00 Hz  
 GB 0

2D NMR plot parameters

CX2 15.00 cm  
 CX1 15.00 cm  
 F2PLO 11.000 ppm  
 F2LO 8797.87 Hz  
 F2PHI -0.100 ppm  
 F2HI -79.98 Hz  
 F1PLO 11.000 ppm  
 F1LO 8797.87 Hz  
 F1PHI -0.100 ppm  
 F1HI -79.98 Hz  
 F2FPMCM 0.74000 ppm/cm  
 F2HZCM 591.85681 Hz/cm  
 F1FPMCM 0.74000 ppm/cm  
 F1HZCM 591.85681 Hz/cm

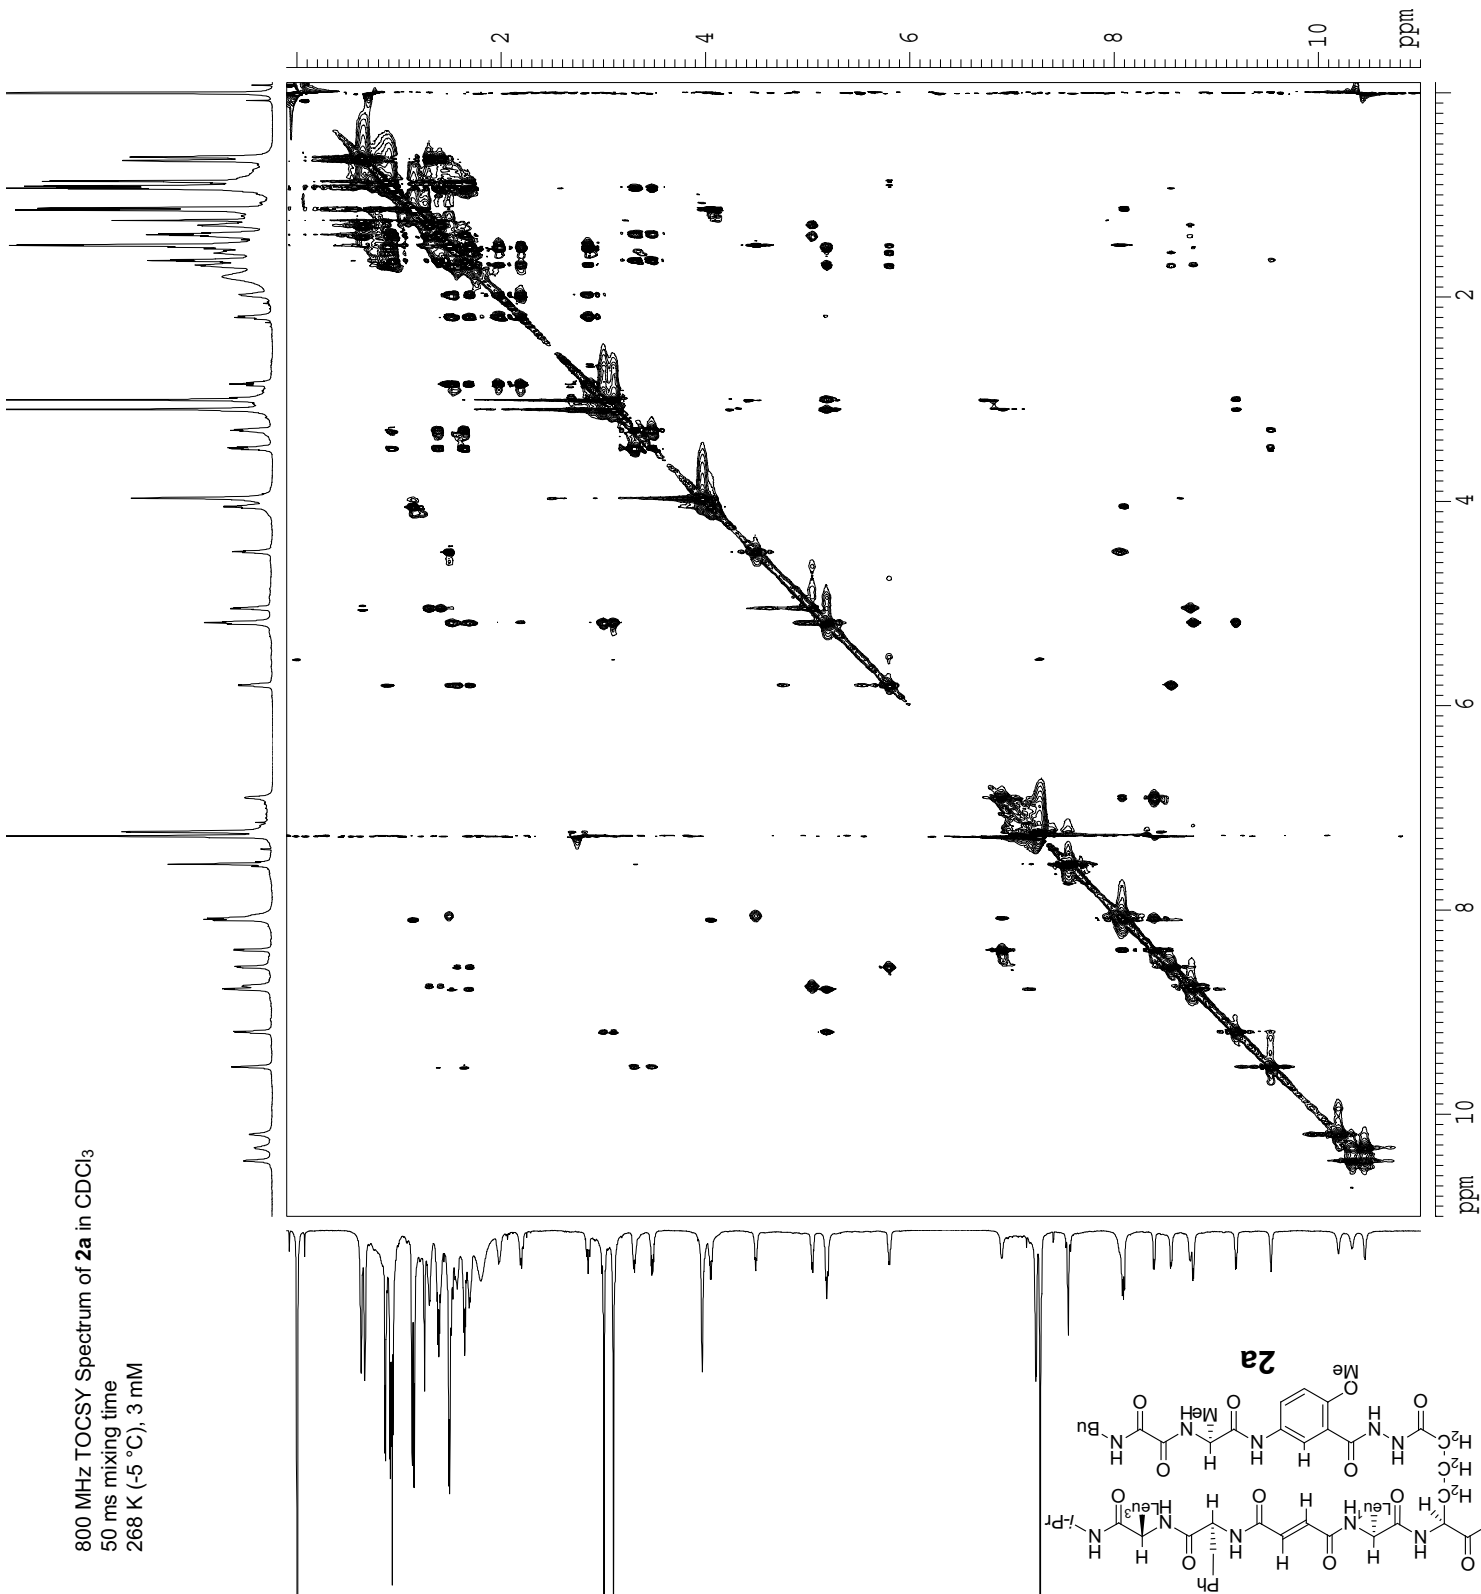

800 MHz TOCSY Spectrum of **2a** in CDCl<sub>3</sub>  
 50 ms mixing time  
 268 K (-5 °C), 3 mM

## Current Data Parameters

USER slevin  
 NAME SL-7-115-800-H  
 EXPNO 2  
 PROCNO 1

## F2 - Acquisition Parameters

Date\_ 20061016  
 Time\_ 0.00  
 INSTRUM varian  
 PROBDH 40.5mmrbroadban  
 PULPROG wgtocpsy\_bn  
 TD 4096  
 SOLVENT CDCl3  
 NS 32  
 DS 64  
 SWH 10000.000 Hz  
 FIDRES 2.441406 Hz  
 AQ 0.2048500 sec  
 RG 287.4  
 DW 50.000 usec  
 DE 6.00 usec  
 TE 268.5 K

## F1 - Acquisition Parameters

ND0 1  
 TD 256  
 SF01 799.811 MHz  
 FIDRES 39.062500 Hz  
 SW 12.503 ppm  
 FMODE undefined

## F2 - Processing parameters

SI 2048  
 SF 799.8065514 MHz  
 WDW QSI  
 SSB 2  
 LB 0.00 Hz  
 GB 0  
 PC 1.40

## F1 - Processing parameters

SI 2048  
 MC2 States  
 SF 799.8065514 MHz  
 WDW QSI  
 SSB 2  
 LB 0.00 Hz  
 GB 0

## 2D NMR plot parameters

CX2 15.00 cm  
 CX1 15.00 cm  
 F2PLO 11.000 ppm  
 F2LO 8798.22 Hz  
 F2PHI 5.494 ppm  
 F2HI 4393.32 Hz  
 F1PLO 11.000 ppm  
 F1LO 8797.87 Hz  
 F1PHI 5.500 ppm  
 F1HI 4398.81 Hz  
 F2PMCM 0.36711 ppm/cm  
 F2HCM 293.161978 Hz/cm  
 F1PMCM 0.36668 ppm/cm  
 F1HCM 293.271103 Hz/cm

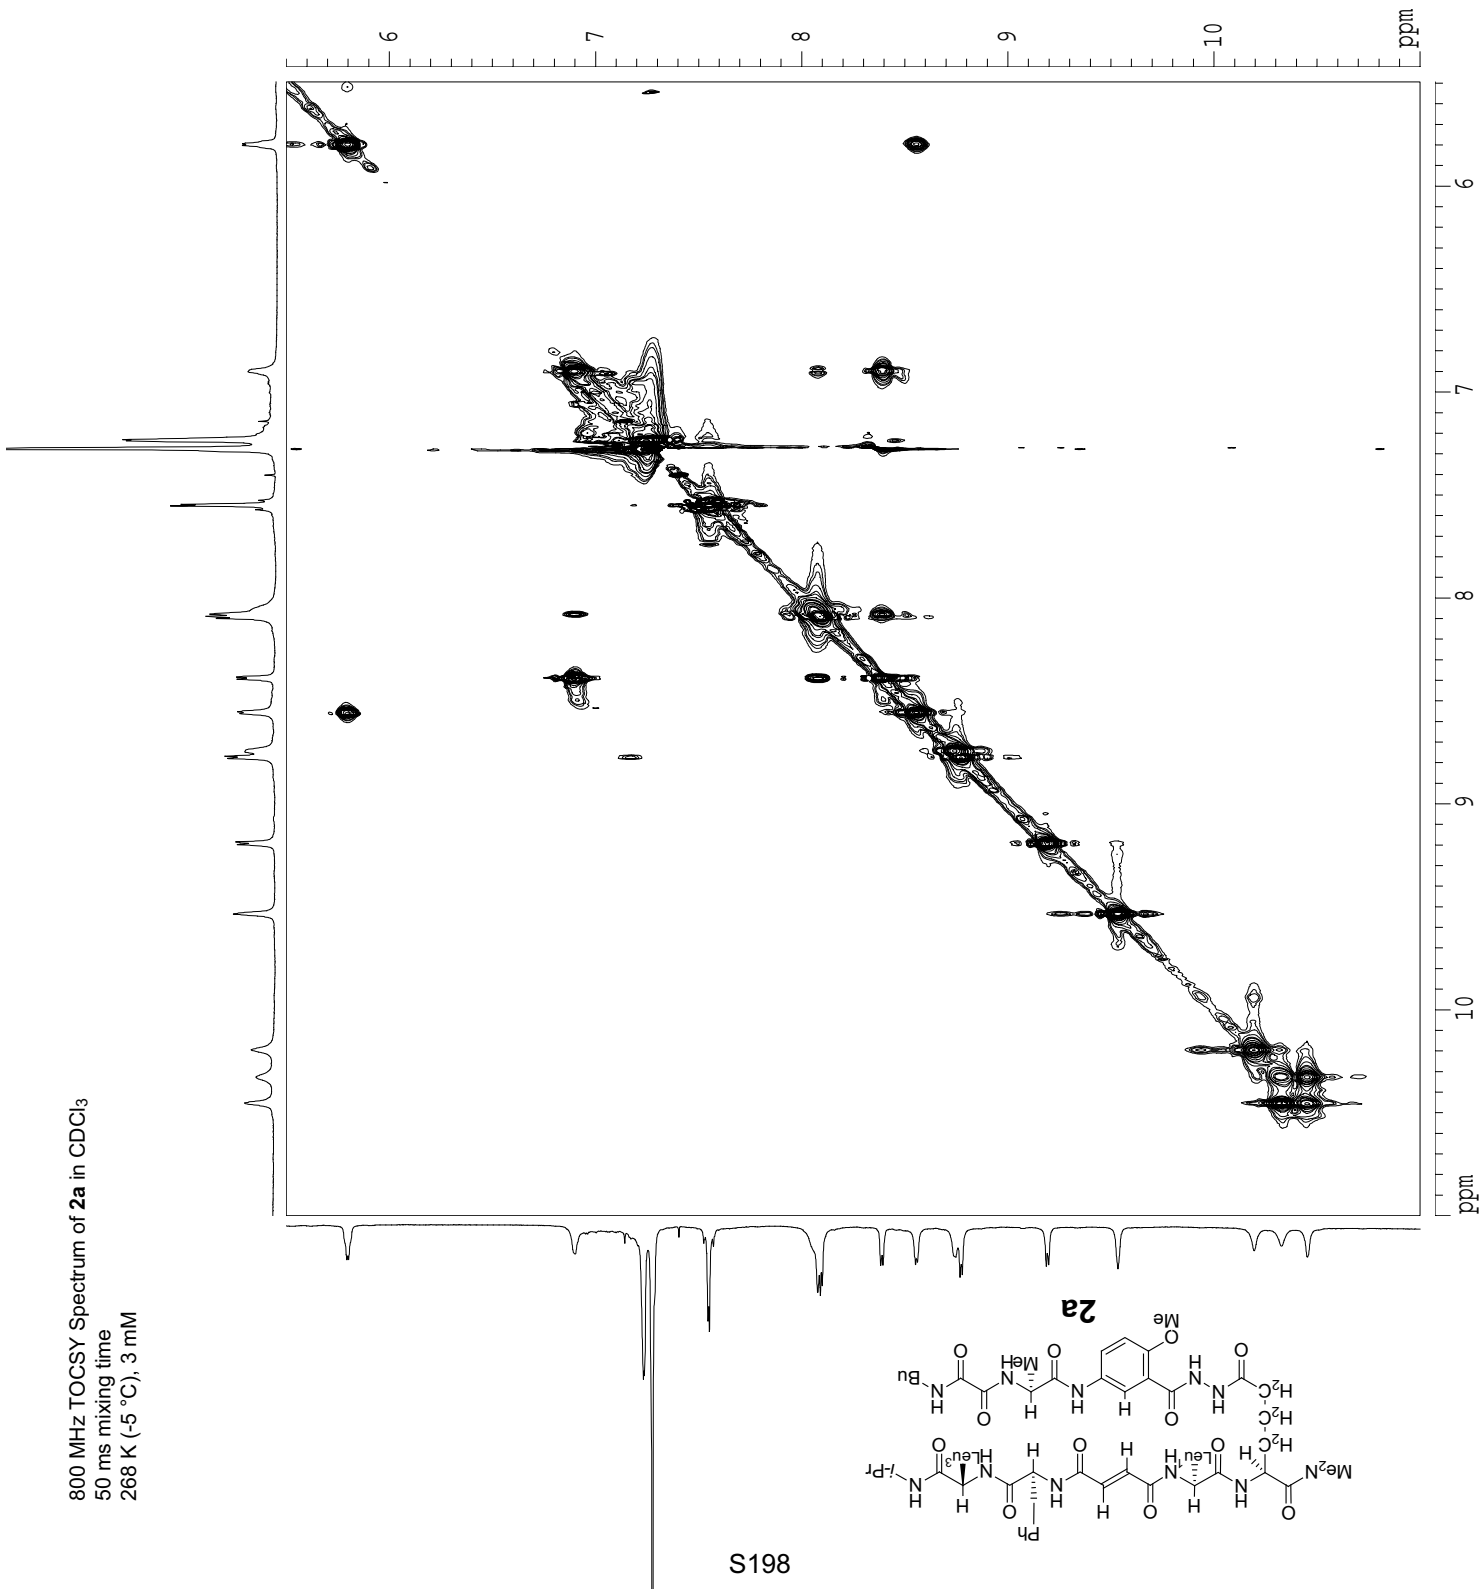

Current Data Parameters  
 USER slevin  
 NAME SL-7-115-800-H  
 EXPNO 2  
 PROCNO 1

F2 - Acquisition Parameters  
 Date\_ 20061016  
 Time\_ 0.00  
 INSTRUM varian  
 PROBHD 40:5mm broadband  
 PULPROG wgtocsy\_bn  
 TD 4096  
 SOLVENT CDCl3  
 NS 32  
 DS 64  
 SWH 10000.000 Hz  
 FIDRES 2.441406 Hz  
 AQ 0.2048500 sec  
 RG 287.4  
 DW 50.000 usec  
 DE 6.00 usec  
 TE 288.5 K

F1 - Acquisition parameters  
 ND0 1  
 TD 256  
 SFO1 799.811 MHz  
 FIDRES 39.062500 Hz  
 SW 12.503 ppm  
 F1MODE undefined

F2 - Processing parameters  
 SI 2048  
 SF 799.8065514 MHz  
 WDW QSI  
 SSB 2  
 LB 0.00 Hz  
 GB 0  
 PC 1.40

F1 - Processing parameters  
 SI 2048  
 MC2 States  
 SF 799.8065514 MHz  
 WDW QSI  
 SSB 2  
 LB 0.00 Hz  
 GB 0

2D NMR plot parameters  
 CX2 15.00 cm  
 CX1 15.00 cm  
 F2PLO 11.000 ppm  
 F2LO 8797.87 Hz  
 F2PHI 5.500 ppm  
 F2HI 4398.94 Hz  
 F1PLO 5.500 ppm  
 F1LO 4398.94 Hz  
 F1PHI -0.100 ppm  
 F1HI -79.98 Hz  
 F2PMCM 0.36667 ppm/cm  
 F2HZCM 293.26242 Hz/cm  
 F1PMCM 0.37333 ppm/cm  
 F1HZCM 298.59445 Hz/cm

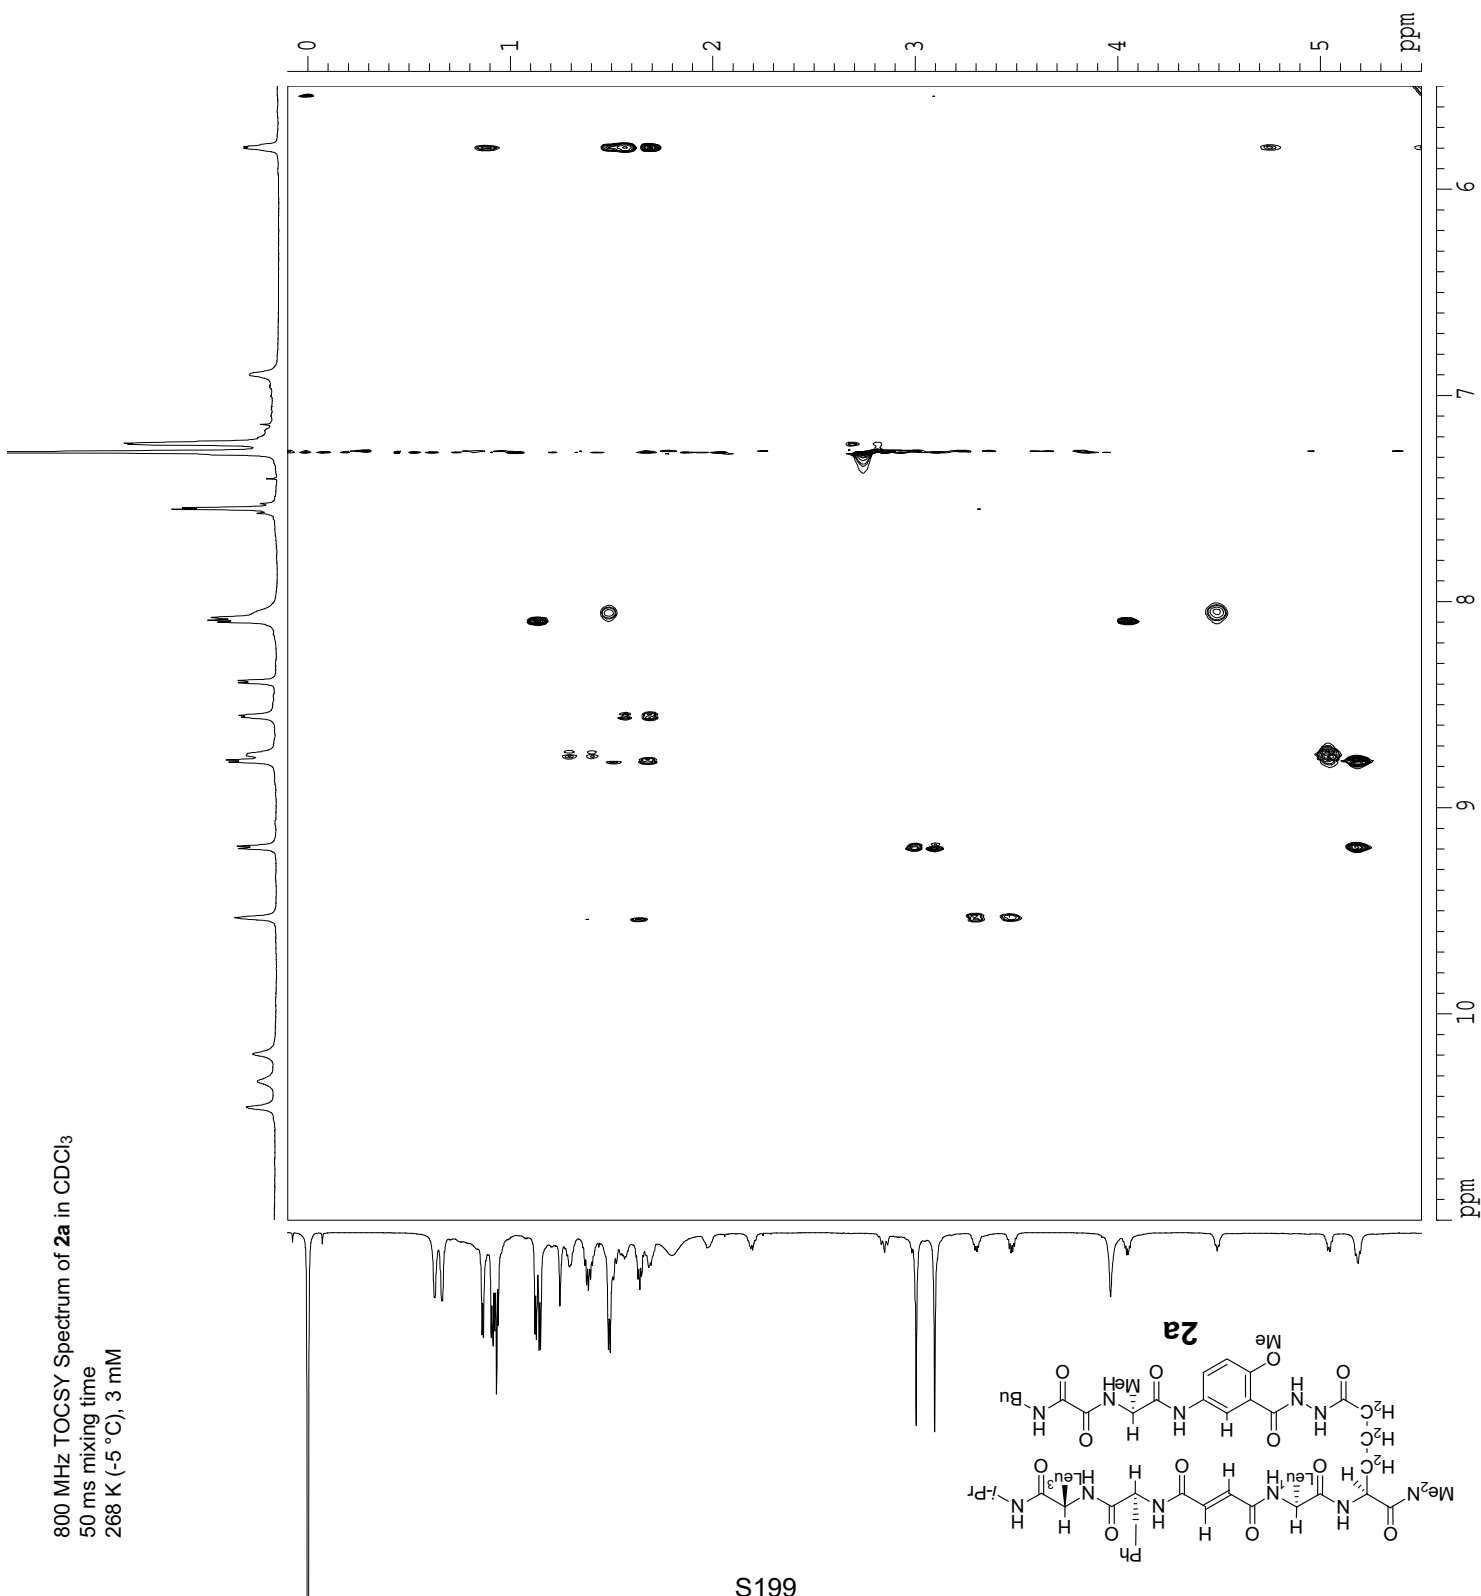

Current Data Parameters  
 USER slevin  
 NAME SL-7-115-800-H  
 EXPNO 2  
 PROCNO 1

## F2 - Acquisition Parameters

Date 20061016  
 Time 0.00  
 INSTRUM varian  
 PROBHD 40:5mmbroadban  
 PULPROG wgtocsy\_bn  
 TD 4096  
 SOLVENT CDCl<sub>3</sub>  
 NS 32  
 DS 64  
 SWH 10000.000 Hz  
 FIDRES 2.441406 Hz  
 AQ 0.2048500 sec  
 RG 287.4  
 DW 50.000 usec  
 DE 6.00 usec  
 TE 268.5 K

## F1 - Acquisition Parameters

ND0 1  
 TD 256  
 SF01 799.811 MHz  
 FIDRES 39.062500 Hz  
 SW 12.503 ppm  
 FMODE undefined

## F2 - Processing parameters

SI 2048  
 SF 799.8065514 MHz  
 WDW QSI  
 SSB 2  
 LB 0.00 Hz  
 GB 0  
 PC 1.40

## F1 - Processing parameters

SI 2048  
 MC2 States  
 SF 799.8065514 MHz  
 WDW QSI  
 SSB 2  
 LB 0.00 Hz  
 GB 0

## 2D NMR plot parameters

CX2 15.00 cm  
 CX1 15.00 cm  
 F2PLO 5.500 ppm  
 F2LO 4398.94 Hz  
 F2PHI -0.100 ppm  
 F2HI -79.98 Hz  
 F1LO 5.500 ppm  
 F1LO 4398.94 Hz  
 F1PHI -0.100 ppm  
 F1HI -79.98 Hz  
 F2PNCM 0.37333 ppm/cm  
 F2H2CM 298.59445 Hz/cm  
 F1PNCM 0.37333 ppm/cm  
 F1H2CM 298.59445 Hz/cm

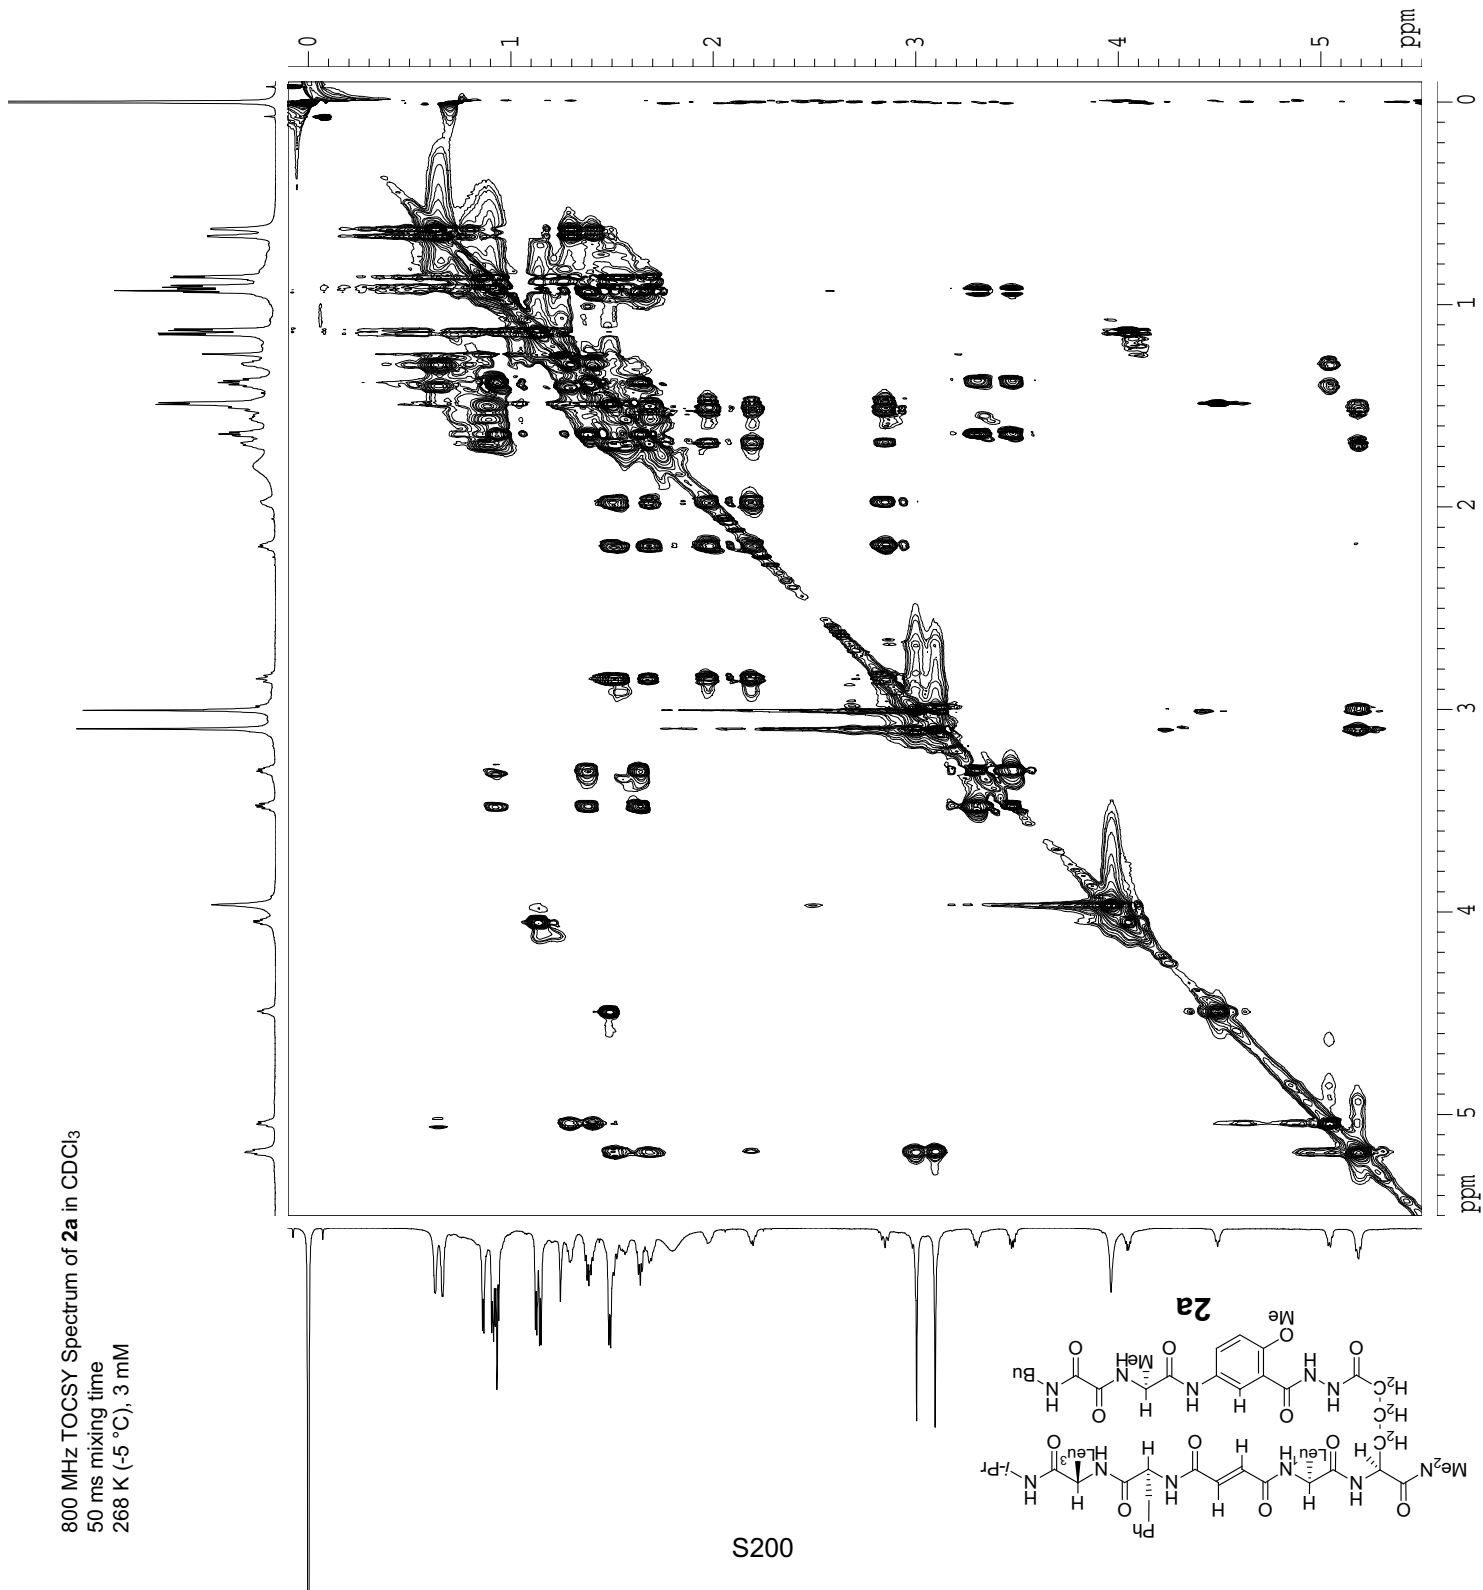





800 MHz NOESY Spectrum of **2a** in CDCl<sub>3</sub>  
 400 ms mixing time  
 268 K (-5 °C), 3 mM

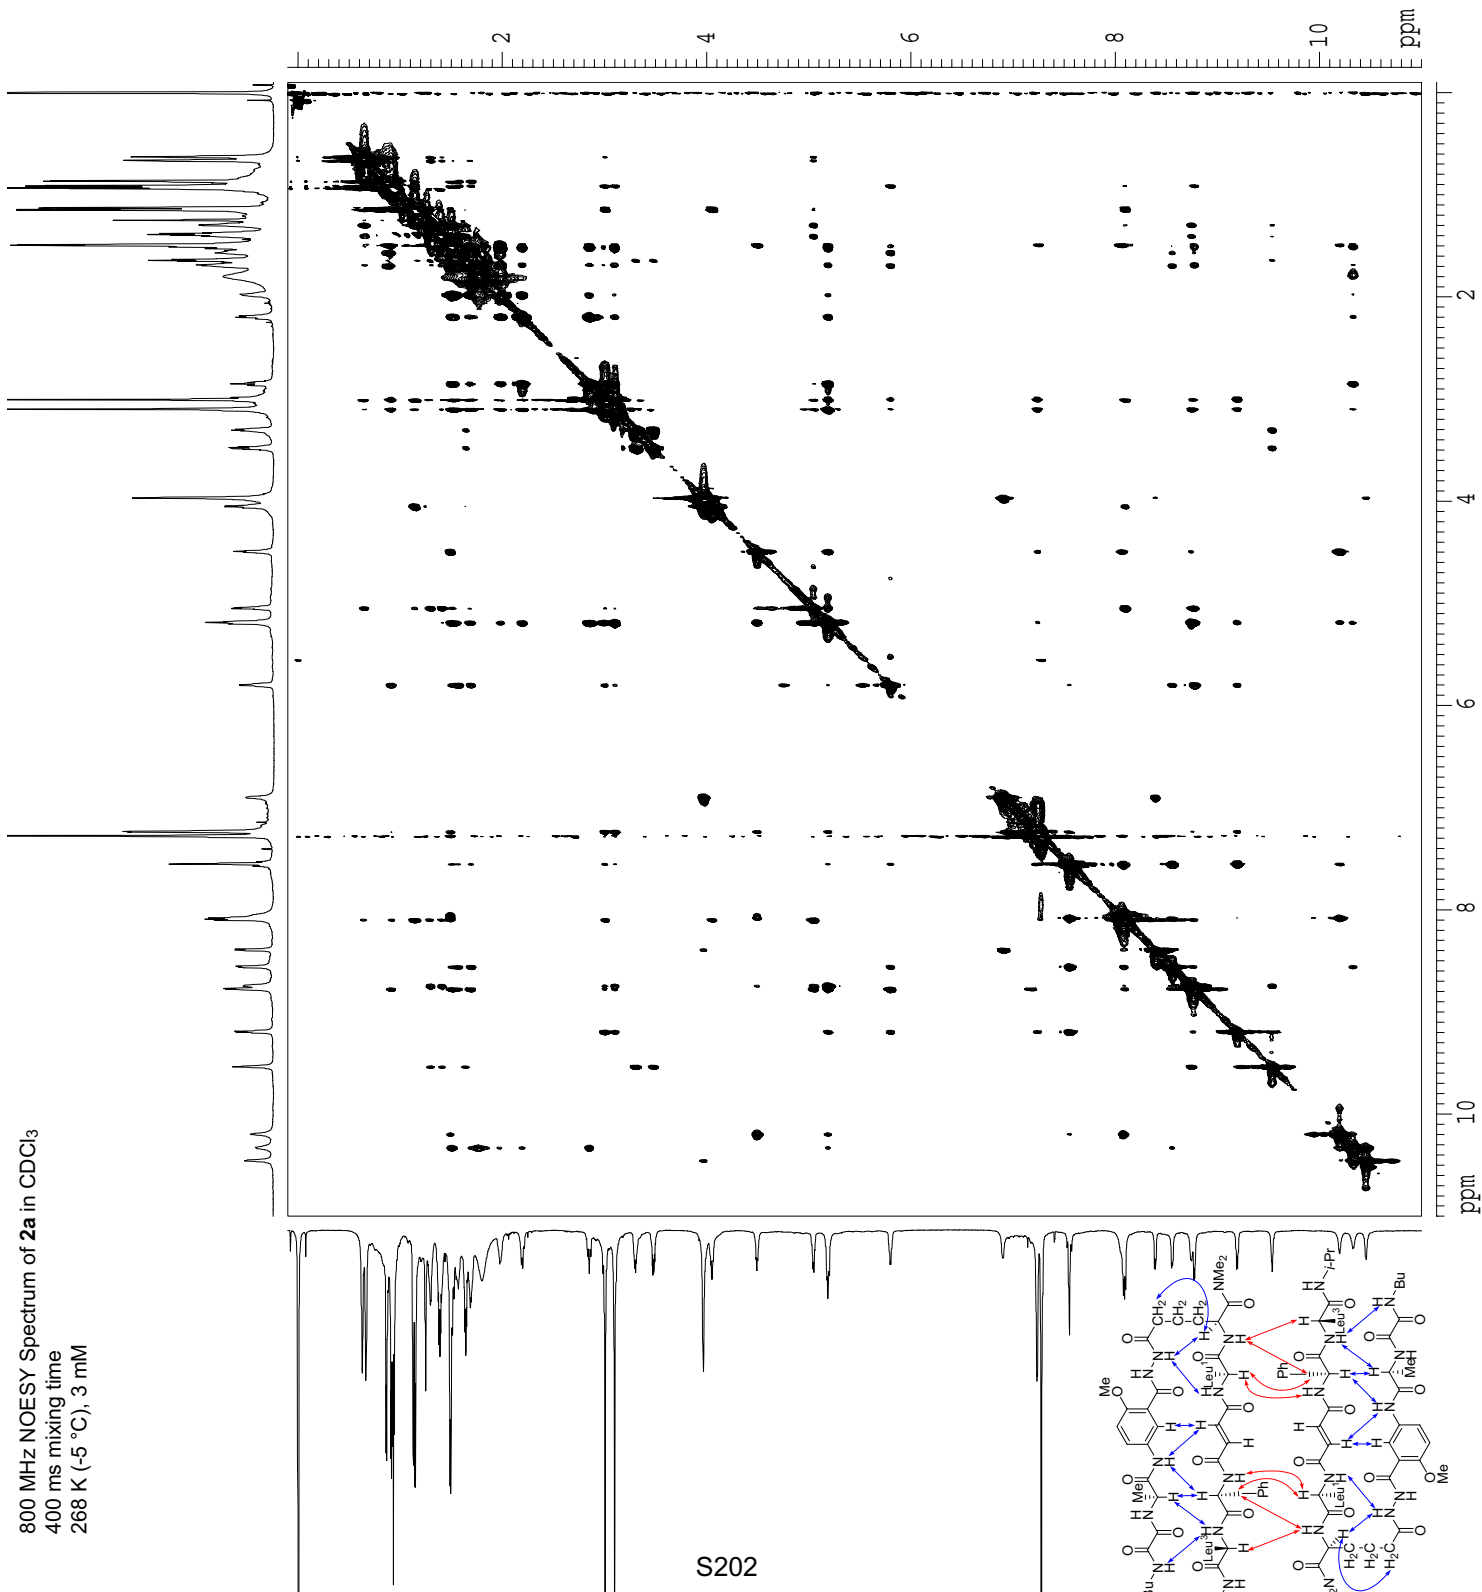

S202

Current Data Parameters  
 USER slevin  
 NAME SL-7-115-800-H  
 EXPNO 3  
 PROCNO 1

F2 - Acquisition Parameters  
 Date\_ 20061016  
 Time 0.00  
 INSTRUM varian  
 PROBHD 40:5mm broadband  
 PULPROG noesyh2o\_pfg\_800\_pln  
 TD 4096  
 SOLVENT CDCl3  
 NS 32  
 DS 64  
 SMH 10000.000 Hz  
 FIDRES 2.441406 Hz  
 AQ 0.2048500 sec  
 RG 128  
 DW 50.000 usec  
 DE 6.00 usec  
 TE 268.5 K

F1 - Acquisition parameters  
 ND0 1  
 TD 256  
 SF01 799.811 MHz  
 FIDRES 39.062500 Hz  
 SW 12.503 ppm  
 FnmODE undefined

F2 - Processing parameters  
 SI 4096  
 SF 799.8065514 MHz  
 WDW QSIGNE  
 SSB 2  
 LB 0.00 Hz  
 GB 0  
 PC 1.40

F1 - Processing parameters  
 SI 2048  
 MC2 States  
 SF 799.8065514 MHz  
 WDW QSIGNE  
 SSB 2  
 LB 0.00 Hz  
 GB 0

2D NMR plot parameters  
 CX2 15.00 cm  
 CX1 15.00 cm  
 F2PLO 11.000 ppm  
 F2LO 8797.87 Hz  
 F2PHI -0.100 ppm  
 F2HI -79.98 Hz  
 F1PLO 11.000 ppm  
 F1LO 8797.87 Hz  
 F1PHI -0.100 ppm  
 F1HI -79.98 Hz  
 F2PPMCM 0.74000 ppm/cm  
 F2HZCM 591.85681 Hz/cm  
 F1PPMCM 0.74000 ppm/cm  
 F1HZCM 591.85681 Hz/cm

800 MHz NOESY Spectrum of **2a** in CDCl<sub>3</sub>  
 400 ms mixing time  
 268 K (-5 °C), 3 mM

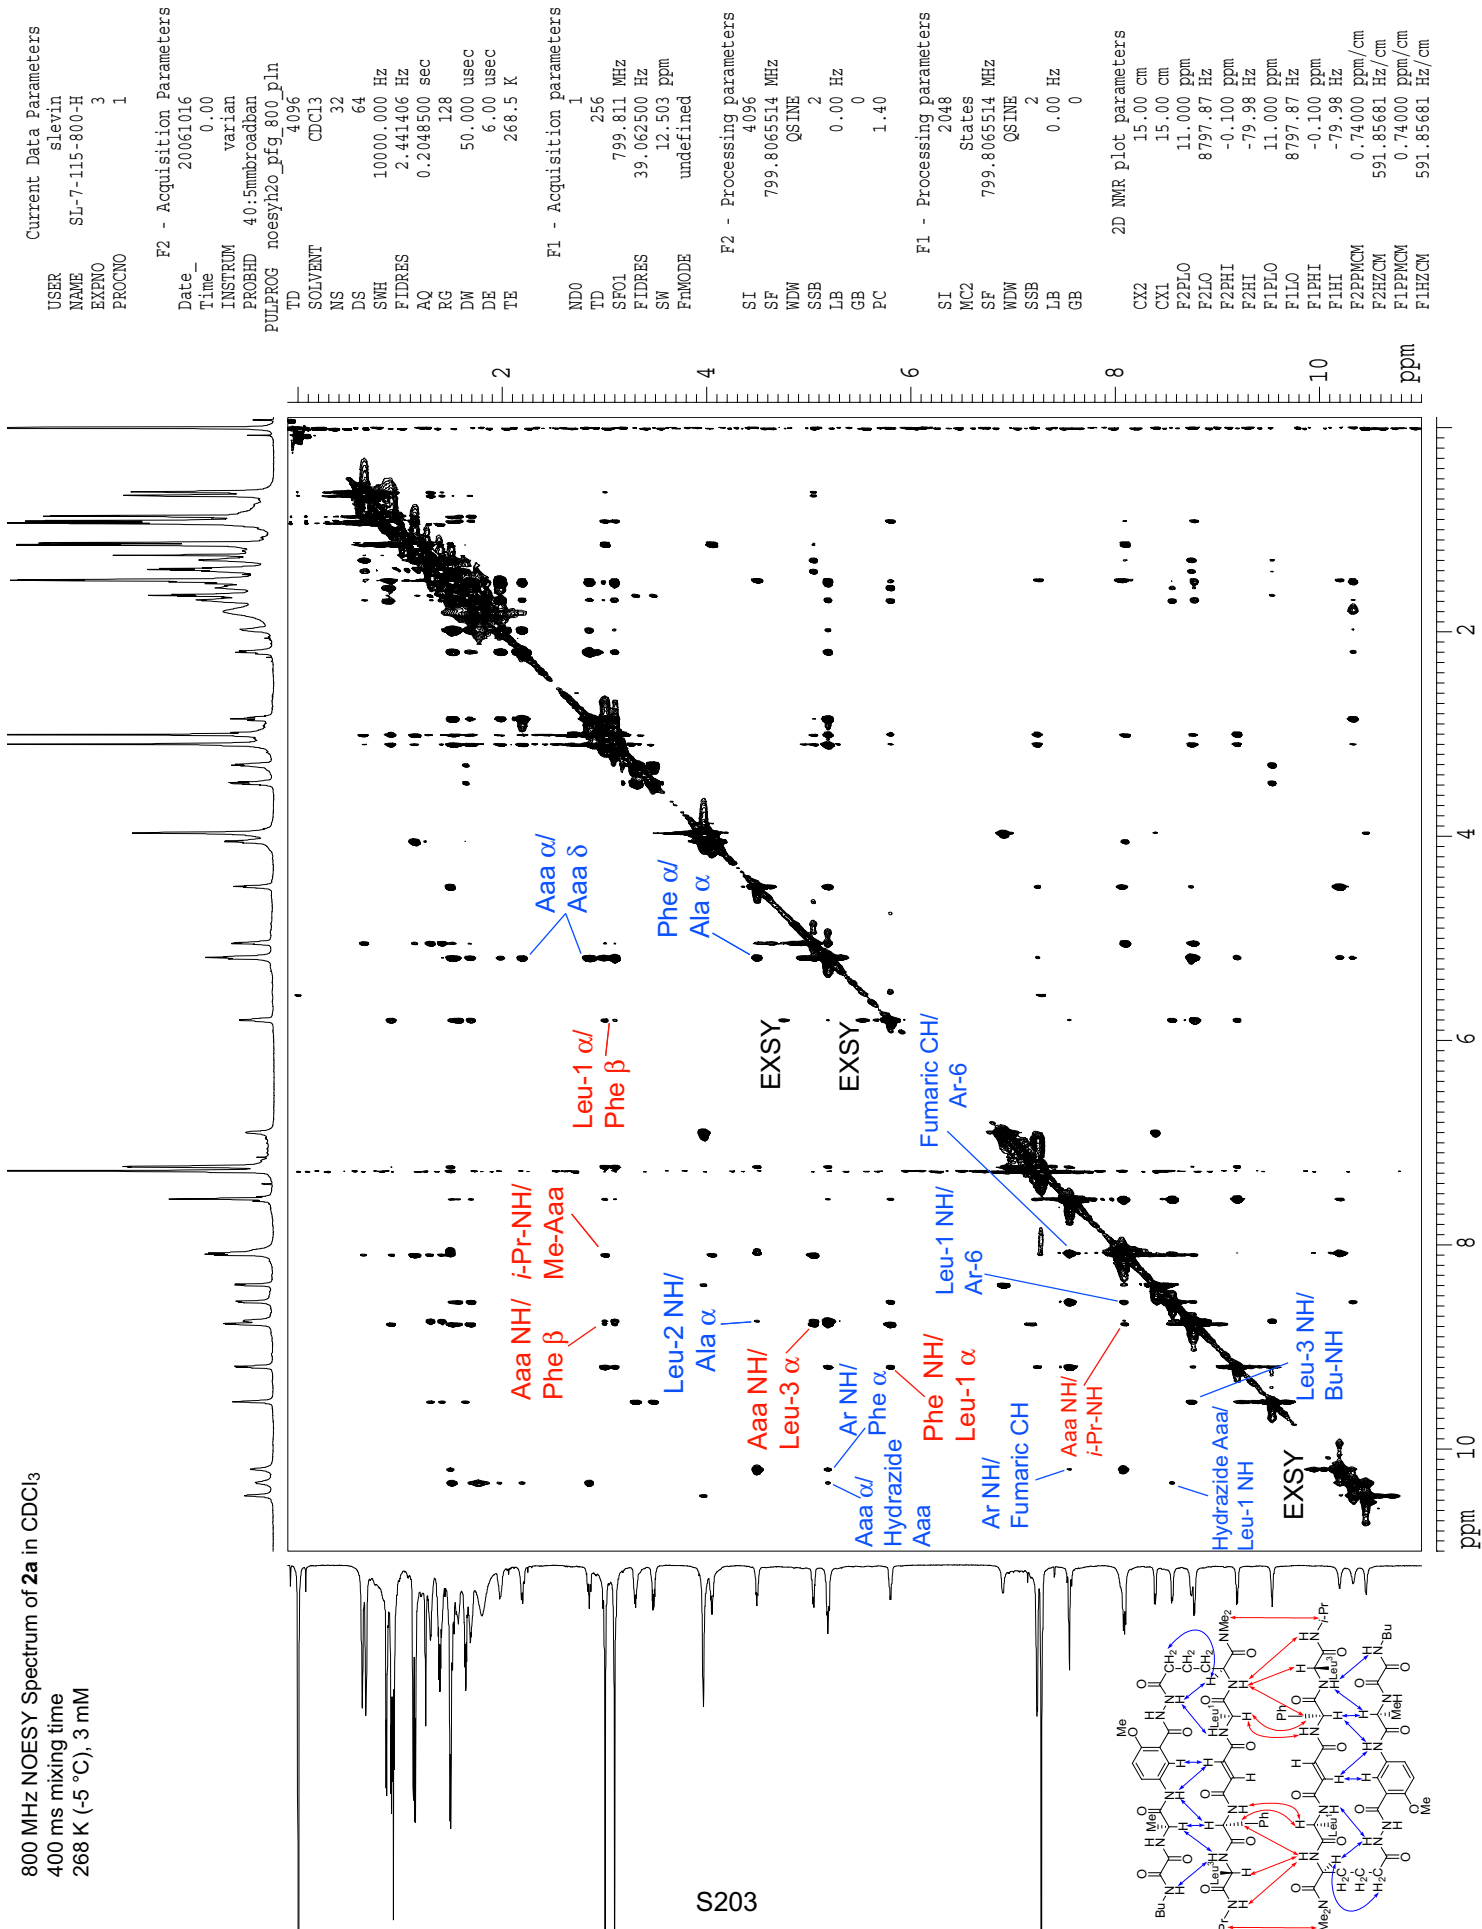

## Current Data Parameters

USER sleVII  
 NAME SL-7-1115-800-H  
 EXPNO 3  
 PROCNO 1

## F2 - Acquisition Parameters

Date 20061016  
 Time 0.00  
 INSTRUM varian  
 PROBHD 40:5mmbroadban  
 PULPROG noesyh2o\_pfg\_800\_pln  
 TD 4096  
 SOLVENT CDCl3  
 NS 32  
 DS 64  
 SWH 10000.000 Hz  
 FIDRES 2.441406 Hz  
 AQ 0.2048500 sec  
 RG 128  
 DW 50.000 usec  
 DE 6.00 usec  
 TE 268.5 K

## F1 - Acquisition Parameters

ND0 1  
 TD 256  
 SFO1 799.811 MHz  
 FIDRES 39.062500 Hz  
 SW 12.503 ppm  
 FMODE undefined

## F2 - Processing parameters

SI 4096  
 SF 799.8065514 MHz  
 WDW QSINE  
 SSB 2  
 LB 0.00 Hz  
 GB 0  
 PC 1.40

## F1 - Processing parameters

SI 2048  
 MC2 States  
 SF 799.8065514 MHz  
 WDW QSINE  
 SSB 2  
 LB 0.00 Hz  
 GB 0

## 2D NMR plot parameters

CX2 15.00 cm  
 CX1 15.00 cm  
 F2PLO 5.503 ppm  
 F2LO 4401.25 Hz  
 F2PHI -0.101 ppm  
 F2HI -81.17 Hz  
 F1PLO 5.506 ppm  
 F1LO 4403.69 Hz  
 F1PHI -0.105 ppm  
 F1HI -83.62 Hz  
 F2PPMCM 0.37363 ppm/cm  
 F2HZCM 298.82816 Hz/cm  
 F1PPMCM 0.37403 ppm/cm  
 F1HZCM 299.15366 Hz/cm

800 MHz NOESY Spectrum of **2a** in CDCl<sub>3</sub>  
 400 ms mixing time  
 268 K (-5 °C), 3 mM

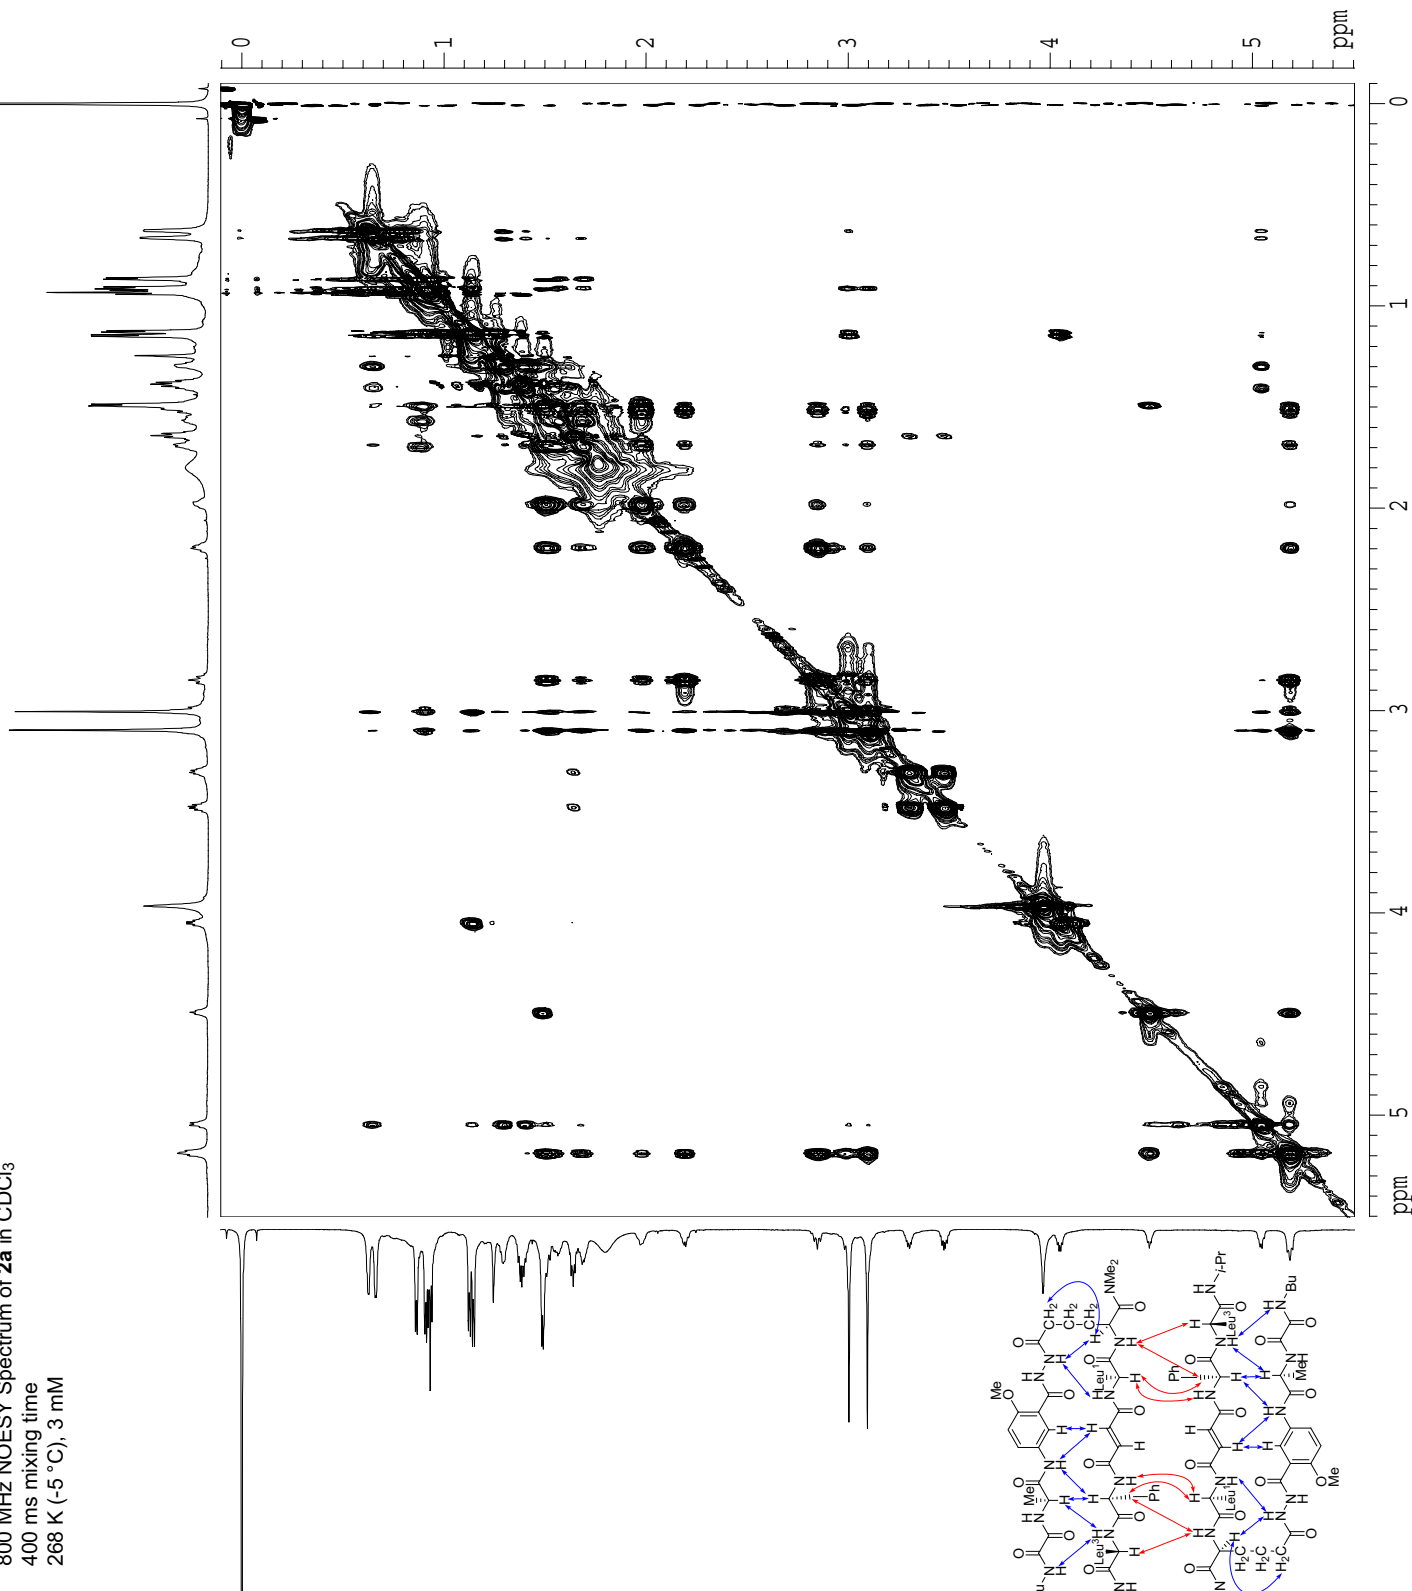

Supporting Information

Current Data Parameters  
 USER slevin  
 NAME SL-7-115-800-H  
 EXPNO 3  
 PROCNO 1

F2 - Acquisition Parameters

Date\_ 20061016  
 Time\_ 0.00  
 INSTRUM varian  
 PROBHD 40:5mmbracdban  
 PULPROG noesyh2o\_pfg\_800\_pln  
 TD 4096  
 SOLVENT CDCl3  
 NS 32  
 DS 64  
 SWH 10000.000 Hz  
 FIDRES 2.441406 Hz  
 AQ 0.2048500 sec  
 RG 128  
 DM 50.000 usec  
 DE 6.00 usec  
 TE 268.5 K

F1 - Acquisition Parameters

ND0 1  
 TD 256  
 SF01 799.811 MHz  
 FIDRES 39.062500 Hz  
 SW 12.503 ppm  
 FhMODE undefined

F2 - Processing parameters

SI 4096  
 SF 799.8065514 MHz  
 WDW QSI  
 SSB 2  
 LB 0.00 Hz  
 GB 0  
 PC 1.40

F1 - Processing parameters

SI 2048  
 MC2 States  
 SF 799.8065514 MHz  
 WDW QSI  
 SSB 2  
 LB 0.00 Hz  
 GB 0

2D NMR plot parameters

CX2 15.00 cm  
 CX1 15.00 cm  
 F2PLO 11.000 ppm  
 F2LO 8797.87 Hz  
 F2PHI 5.500 ppm  
 F2HI 4398.94 Hz  
 F1PLO 5.506 ppm  
 F1LO 4403.69 Hz  
 F1PHI -0.105 ppm  
 F1HI -83.62 Hz  
 F2PPMCM 0.36667 ppm/cm  
 F2HZCM 293.26242 Hz/cm  
 F1PPMCM 0.37403 ppm/cm  
 F1HZCM 299.15366 Hz/cm

S. Levin and J. S. Nowick

800 MHz NOESY Spectrum of **2a** in CDCl<sub>3</sub>  
 400 ms mixing time  
 268 K (-5 °C), 3 mM

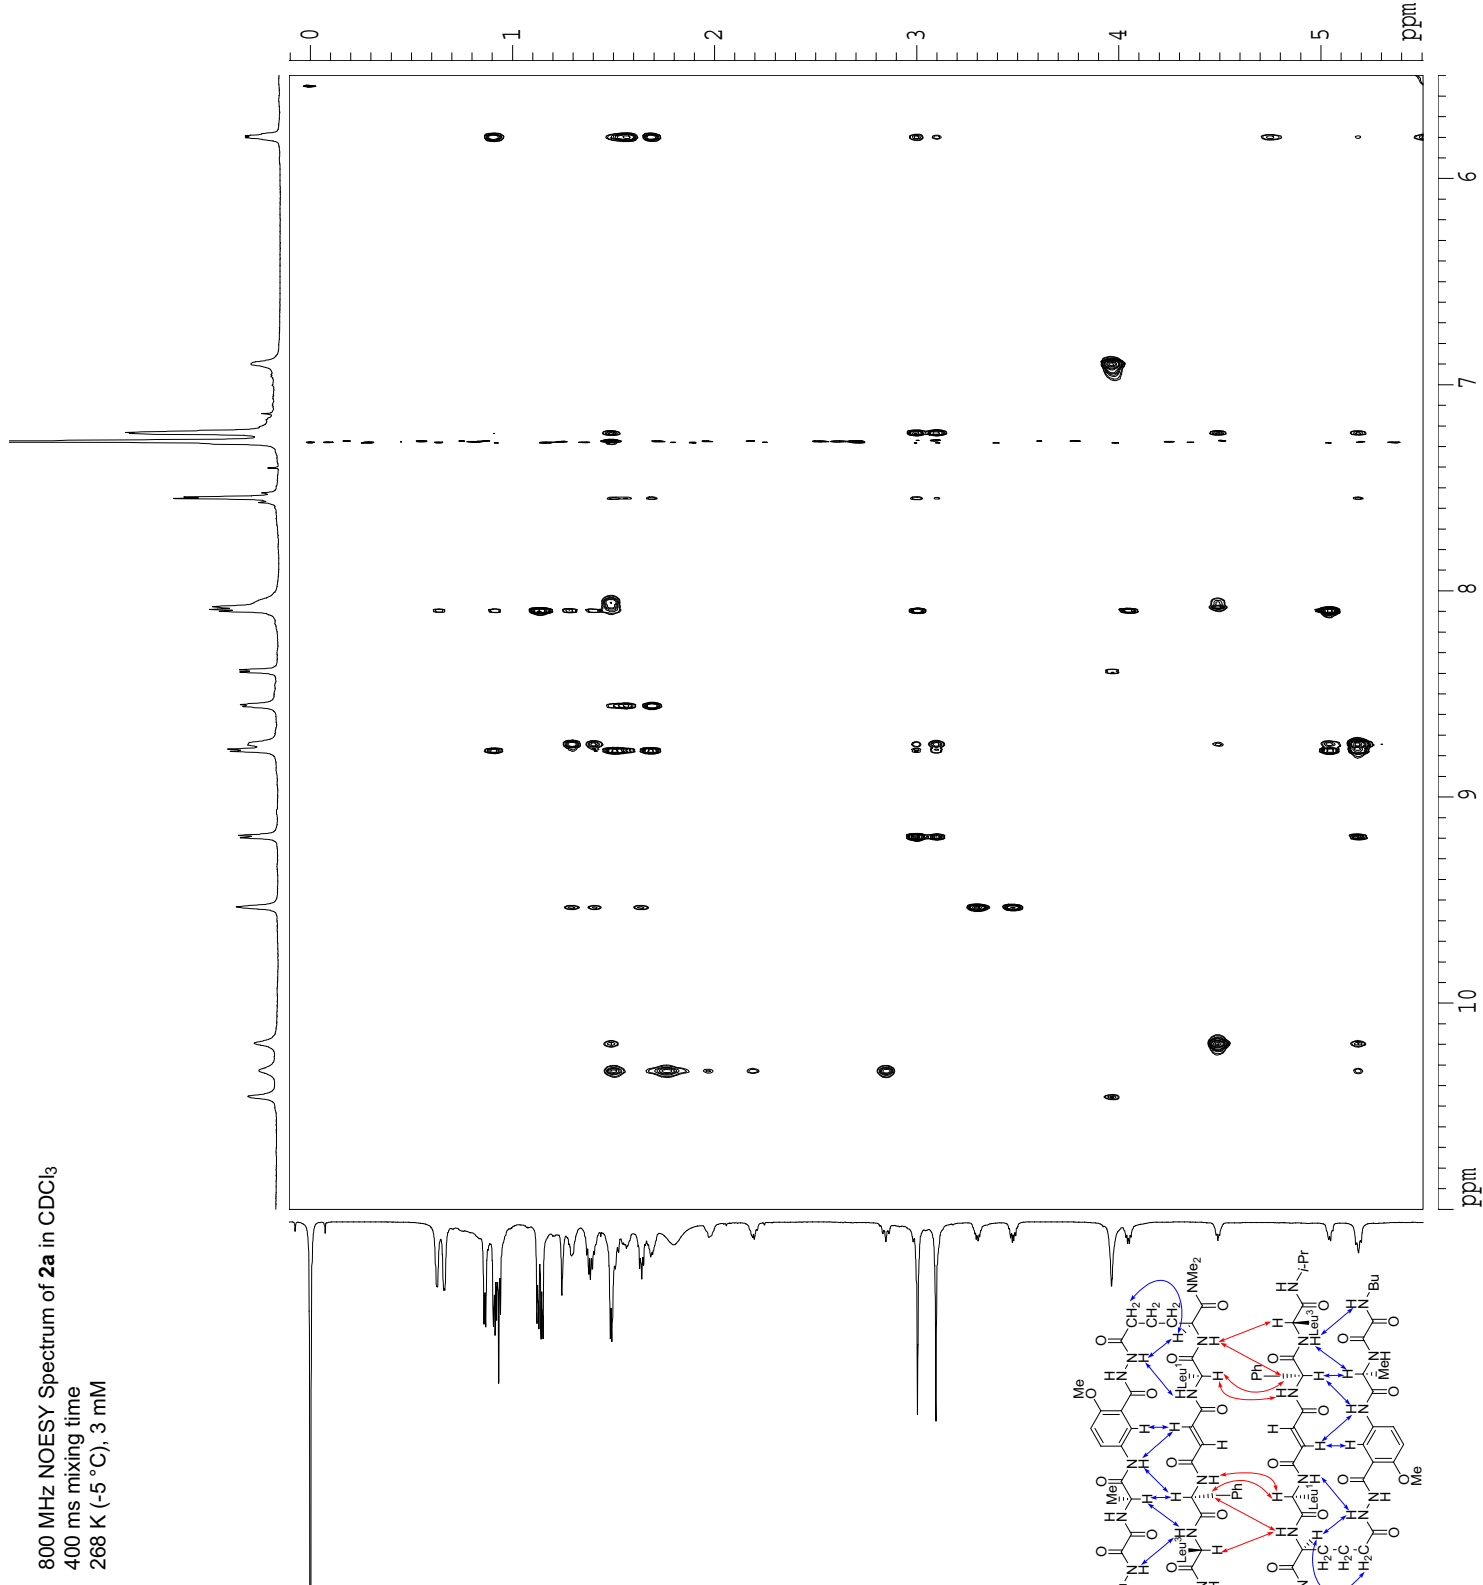

800 MHz NOESY Spectrum of **2a** in CDCl<sub>3</sub>  
 400 ms mixing time  
 268 K (-5 °C), 3 mM

Supporting Information

Current Data Parameters  
 USER slevin  
 NAME SL-7-115-800-H  
 EXPNO 3  
 PROCNO 1

F2 - Acquisition Parameters

Date 20061016  
 Time 0.00  
 INSTRUM varian  
 PROBHD 40:5mmrbroadban  
 PULPROG noesyh2o\_pfg\_800\_pln  
 TD 4096  
 SOLVENT CDCl<sub>3</sub>  
 NS 32  
 DS 64  
 SWH 10000.000 Hz  
 FIDRES 2.441406 Hz  
 AQ 0.2048500 sec  
 RG 128  
 DW 50.000 usec  
 DE 6.00 usec  
 TE 268.5 K

F1 - Acquisition parameters

ND0 1  
 TD 256  
 SFO1 799.811 MHz  
 FIDRES 39.062500 Hz  
 SW 12.503 ppm  
 FMODE undefined

F2 - Processing parameters

SI 4096  
 SF 799.8065514 MHz  
 WDW QSINE  
 SSB 2  
 LB 0.00 Hz  
 GB 0  
 PC 1.40

F1 - Processing parameters

SI 2048  
 MC2 States  
 SF 799.8065514 MHz  
 WDW QSINE  
 SSB 2  
 LB 0.00 Hz  
 GB 0

2D NMR plot parameters

CX2 15.00 cm  
 CX1 15.00 cm  
 F2PLO 11.000 ppm  
 FZLO 8798.22 Hz  
 F2PHI 5.500 ppm  
 F2HI 4398.81 Hz  
 F1PLO 11.000 ppm  
 F1LO 8797.87 Hz  
 F1PHI 5.500 ppm  
 F1HI 4398.94 Hz  
 F2PPMCM 0.36671 ppm/cm  
 F2HZCM 293.29428 Hz/cm  
 F1PPMCM 0.36667 ppm/cm  
 F1HZCM 293.26242 Hz/cm

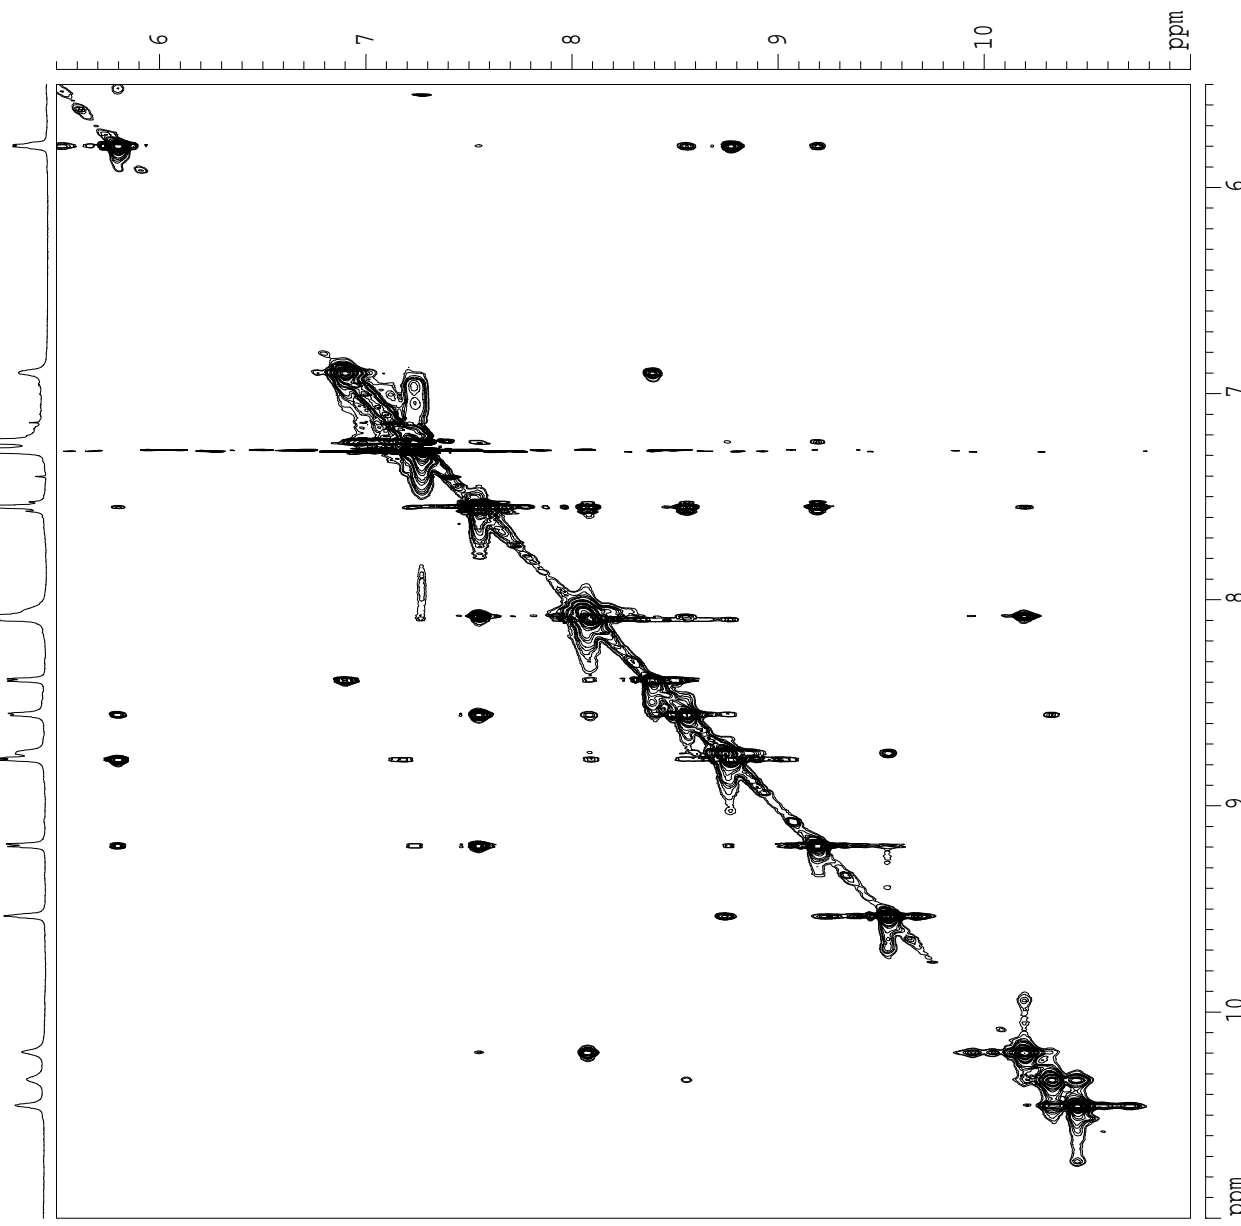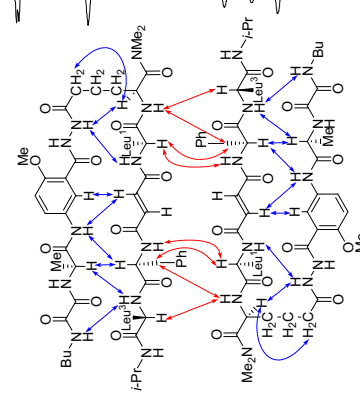

800 MHz NOESY Spectrum of **2a** in CDCl<sub>3</sub>  
 400 ms mixing time  
 268 K (-5 °C), 3 mM

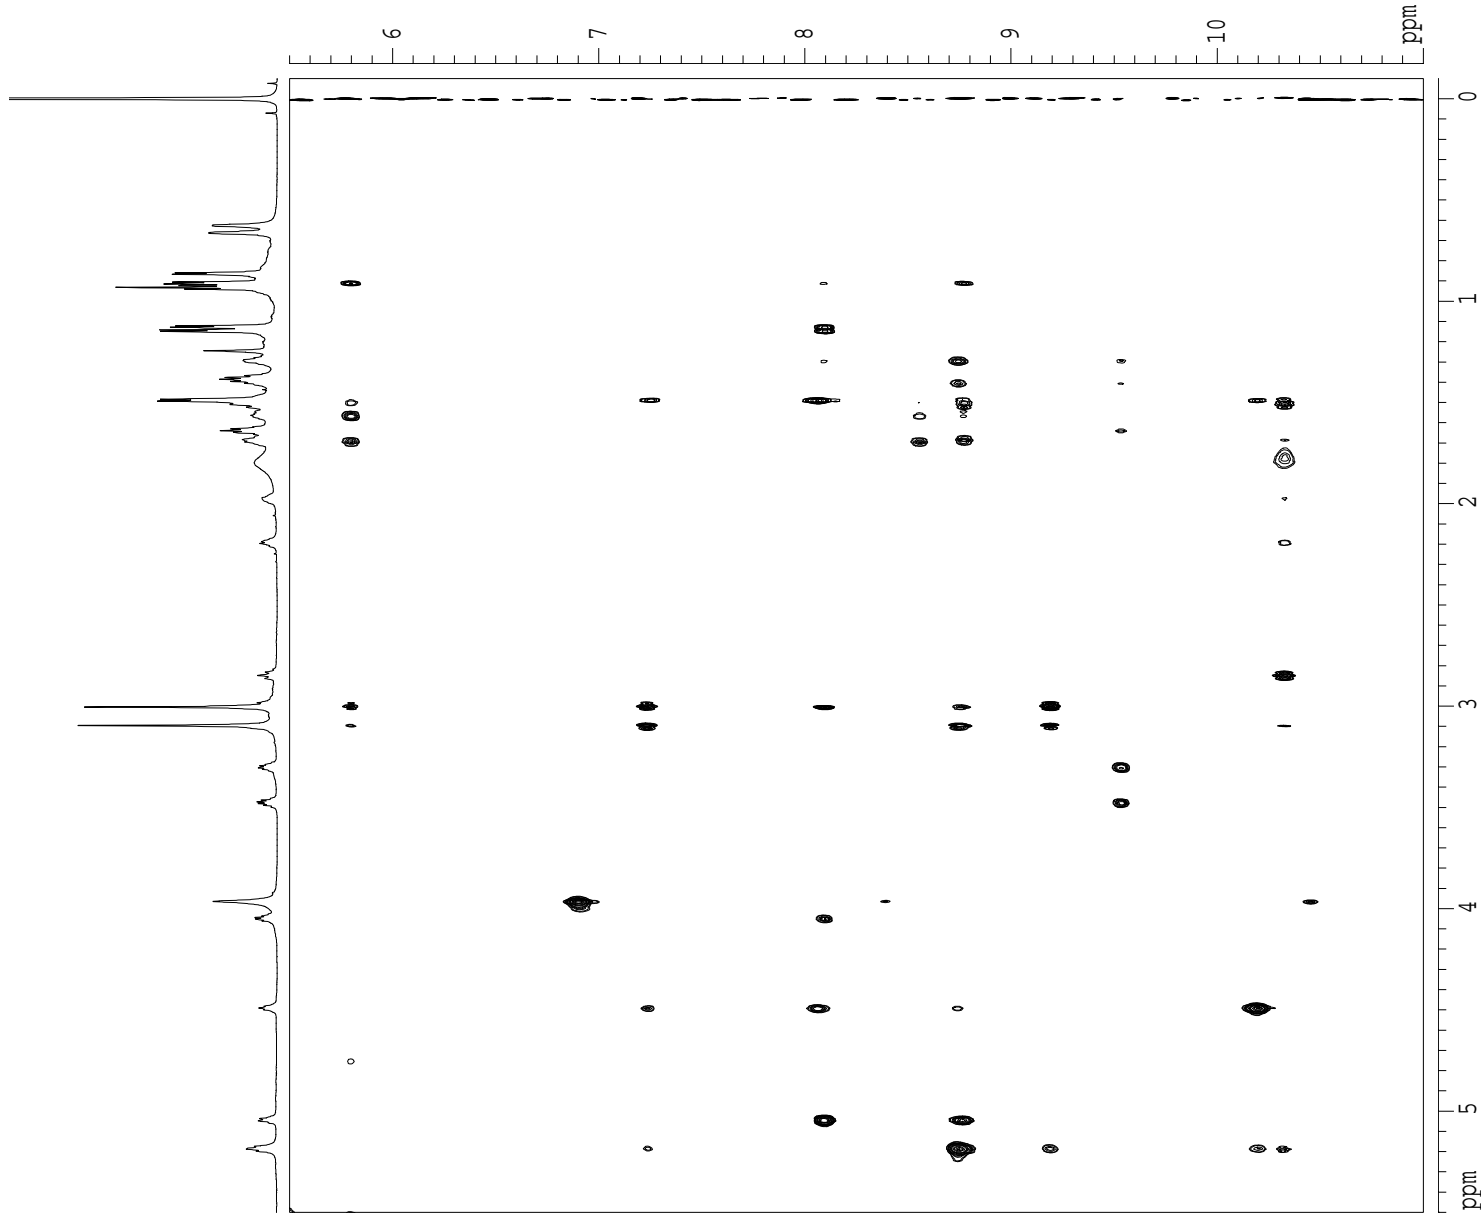

S207

Supporting Information

Current Data Parameters  
 USER slevin  
 NAME SL-7-115-800-H  
 EXPNO 3  
 PROCNO 1

F2 - Acquisition Parameters

Date 20061016  
 Time 0.00  
 INSTRUM varian  
 PROBHD 40:5mmroadban  
 PULPROG noesyh2o\_pfg\_800\_p1n  
 TD 4096  
 SOLVENT CDCl<sub>3</sub>

NS 32  
 DS 64  
 SMH 10000.000 Hz  
 FIDRES 2.441406 Hz  
 AQ 0.2048500 sec  
 RG 128  
 DW 50.000 usec  
 DE 6.00 usec  
 TE 268.5 K

F1 - Acquisition Parameters

ND0 1  
 TD 256  
 SF01 799.811 MHz  
 FIDRES 39.062500 Hz  
 SW 12.503 ppm  
 FwMODE undefined

F2 - Processing parameters

SI 4096  
 SF 799.8065514 MHz  
 WDW QSI  
 SSB 2  
 LB 0.00 Hz  
 GB 0  
 PC 1.40

F1 - Processing parameters

SI 2048  
 MC2 States  
 SF 799.8065514 MHz  
 WDW QSI  
 SSB 2  
 LB 0.00 Hz  
 GB 0

2D NMR plot parameters

CX2 15.00 cm  
 CX1 15.00 cm  
 F2PLO 5.500 ppm  
 F2LO 4398.94 Hz  
 F2PHI -0.100 ppm  
 F2HI -79.98 Hz  
 F1PLO 11.000 ppm  
 F1LO 8798.22 Hz  
 F1PHI 5.500 ppm  
 F1HI 4398.81 Hz  
 F2PPMCM 0.37333 ppm/cm  
 F2HZCM 298.59445 Hz/cm  
 F1PPMCM 0.36671 ppm/cm  
 F1HZCM 293.29428 Hz/cm

S. Levin and J. S. Nowick

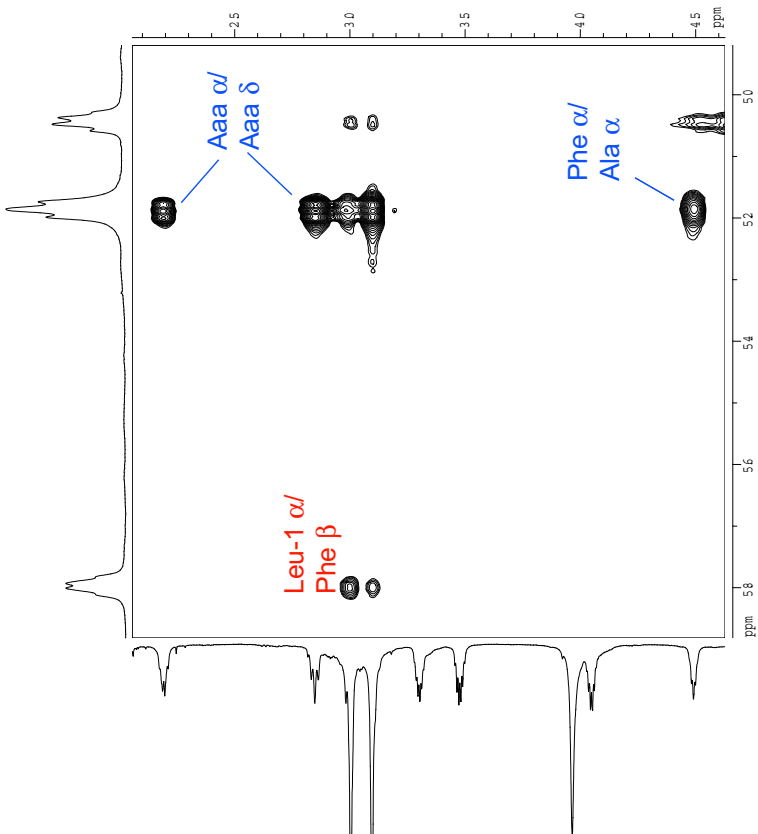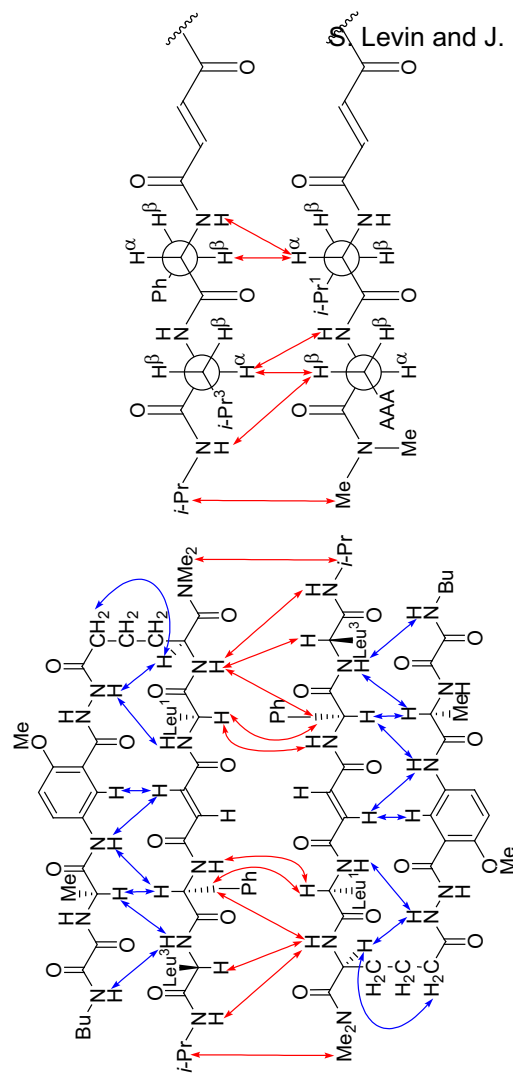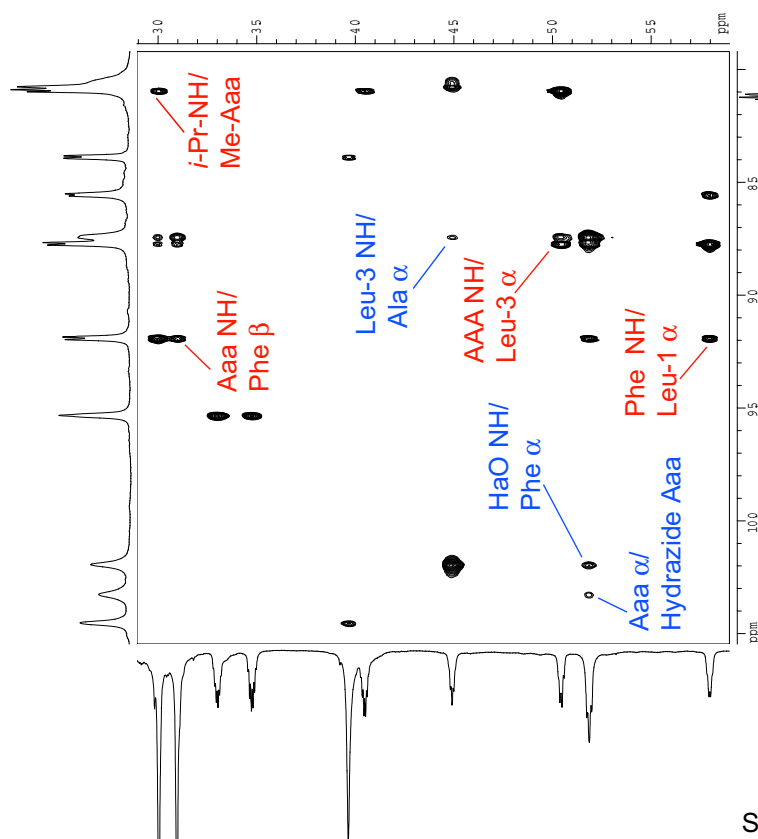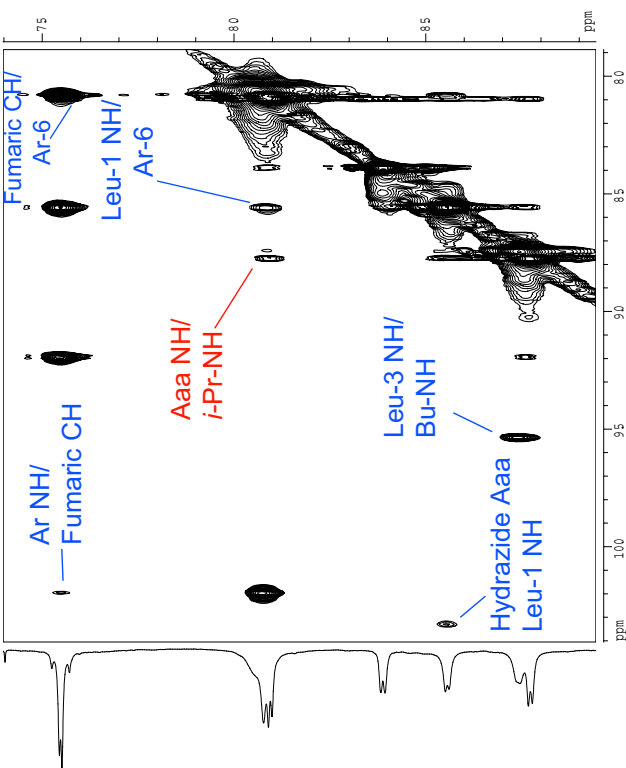



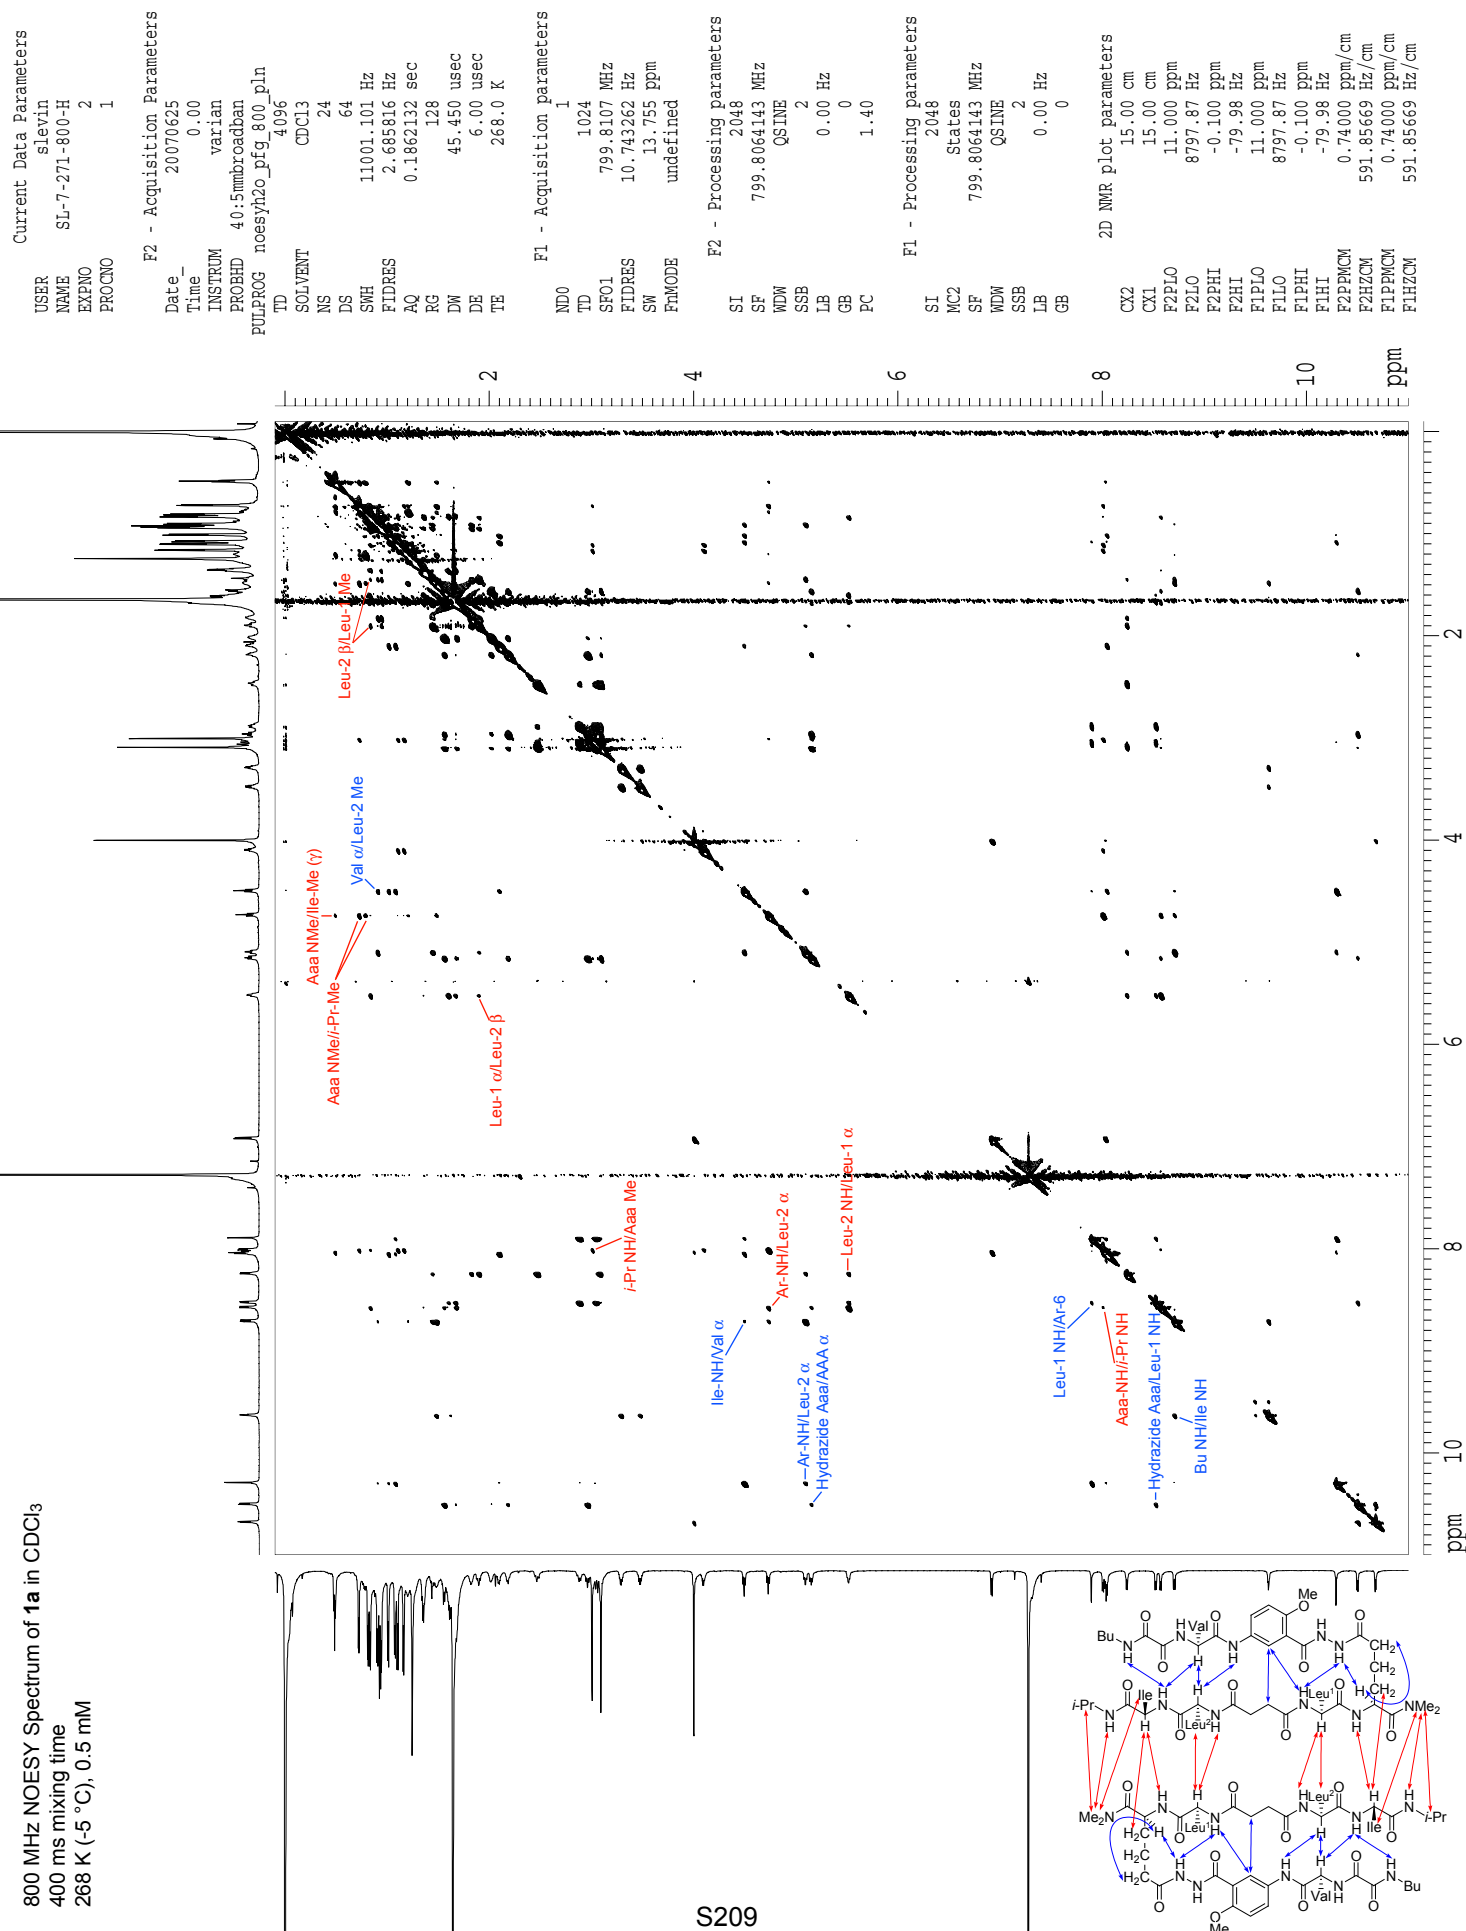

Supporting Information

S. Levin and J. S. Nowick

Current Data Parameters  
 USER slevin  
 NAME SL-7-271-800-H  
 EXPNO 2  
 PROCNO 1

F2 - Acquisition Parameters  
 Date\_ 20070625  
 Time\_ 0.00  
 INSTRUM varian  
 PROBHD 40:5mm broadband  
 PULPROG noesyh2o\_pfg\_800\_pln  
 TD 4096  
 SOLVENT CDCl3  
 NS 24  
 DS 64  
 SWH 11001.101 Hz  
 FIDRES 2.683816 Hz  
 AQ 0.1862132 sec  
 RG 128  
 DM 45.450 usec  
 DE 6.00 usec  
 TE 268.0 K

F1 - Acquisition parameters  
 ND0 1  
 TD 1024  
 SF01 799.8107 MHz  
 FIDRES 10.743262 Hz  
 SW 13.755 ppm  
 FreqMODE undefined

F2 - Processing parameters  
 SI 2048  
 SF 799.8064143 MHz  
 WDM QSIINE  
 SSB 2  
 LB 0.00 Hz  
 GB 0  
 PC 1.40

F1 - Processing parameters  
 SI 2048  
 MC2 States  
 SF 799.8064143 MHz  
 WDM QSIINE  
 SSB 2  
 LB 0.00 Hz  
 GB 0

2D NMR plot parameters  
 CX2 15.00 cm  
 CX1 15.00 cm  
 F2PLO 5.600 ppm  
 F2LO 4478.92 Hz  
 F2PHI -0.100 ppm  
 F2HI -79.98 Hz  
 F1PLO 5.600 ppm  
 F1LO 4478.92 Hz  
 F1PHI -0.100 ppm  
 F1HI -79.98 Hz  
 F2PPMCM 0.38000 ppm/cm  
 F2HZCM 303.92645 Hz/cm  
 F1PPMCM 0.38000 ppm/cm  
 F1HZCM 303.92645 Hz/cm

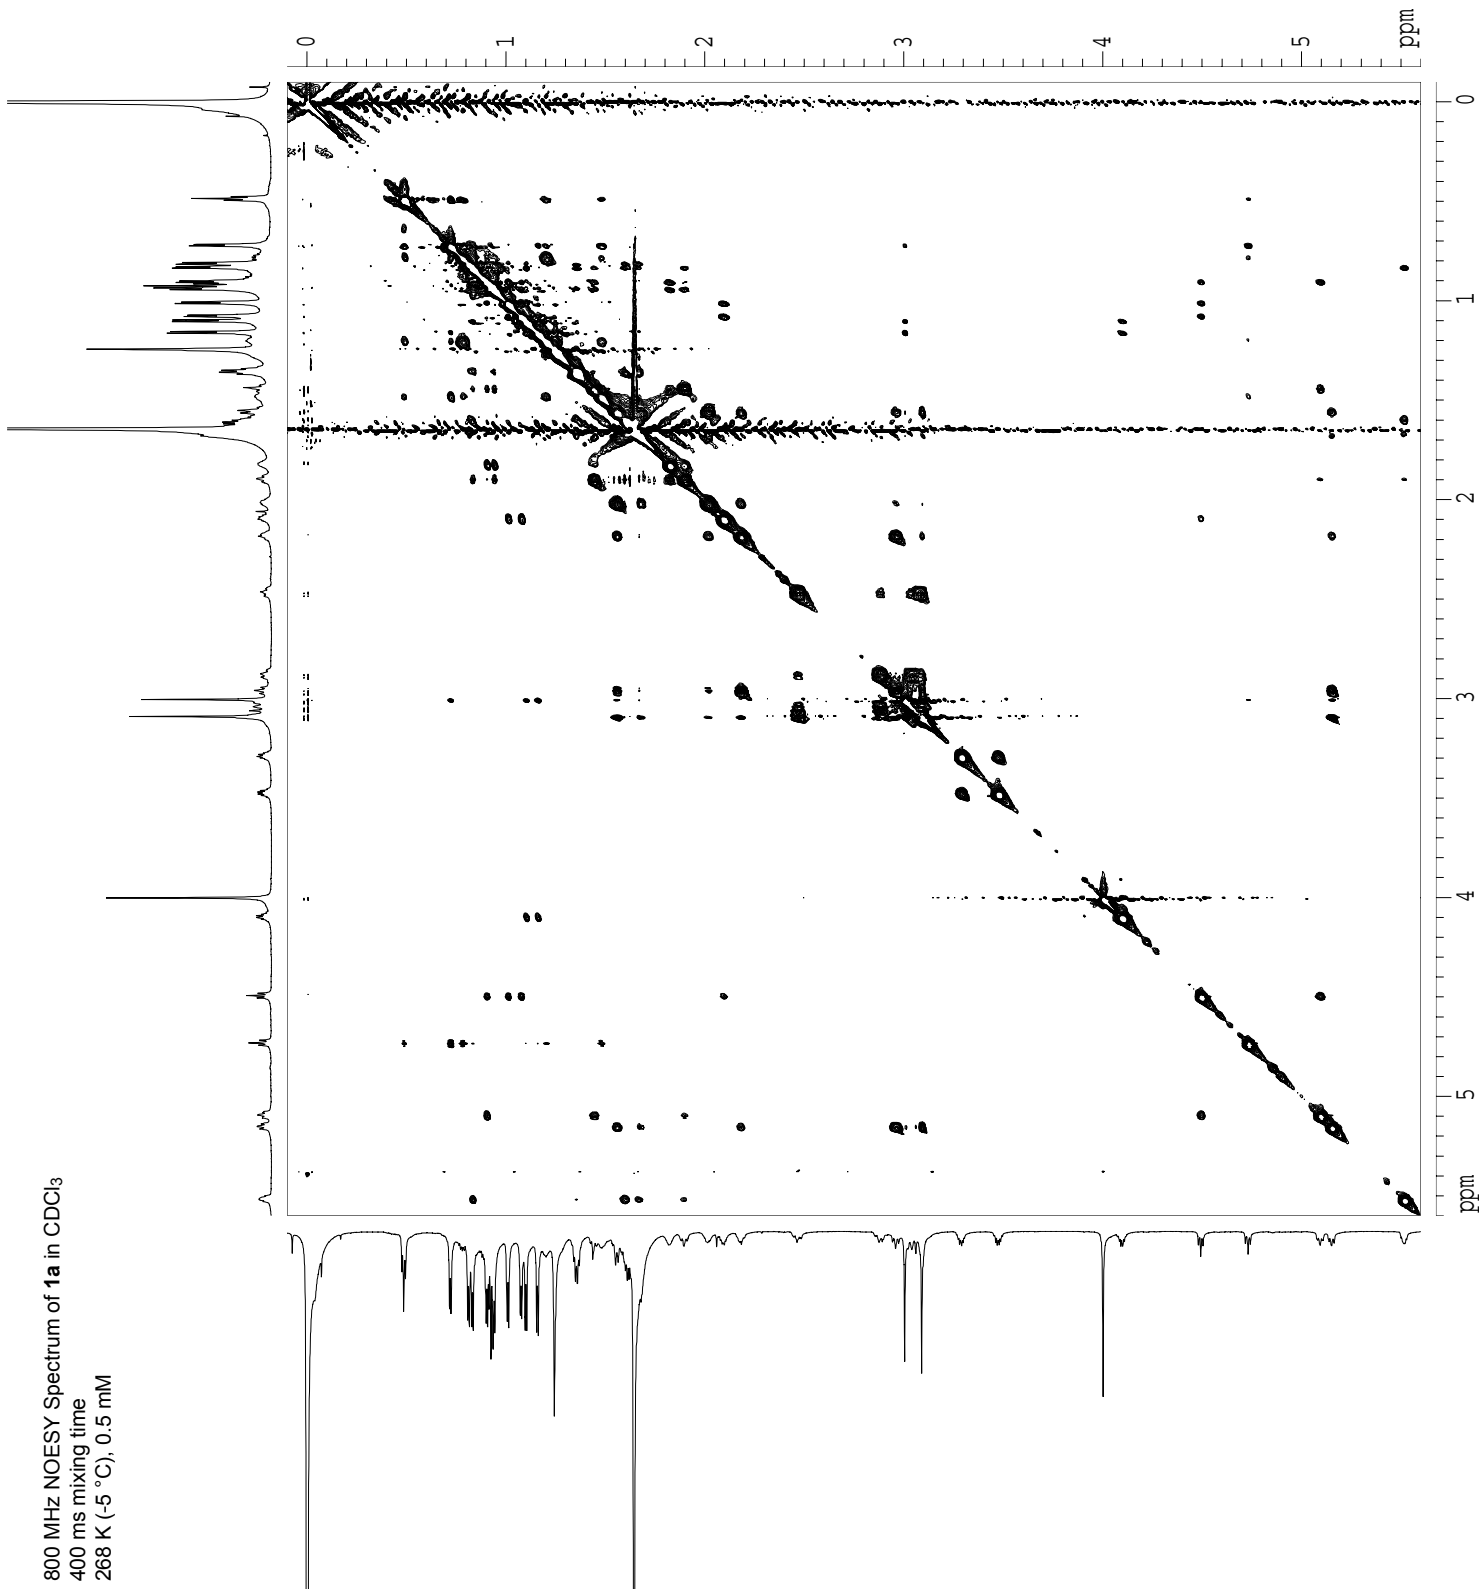

800 MHz NOESY Spectrum of **1a** in CDCl<sub>3</sub>  
 400 ms mixing time  
 268 K (-5 °C), 0.5 mM

Supporting Information

Current Data Parameters  
 USER sievin  
 NAME SL-7-271-800-H  
 EXNO 2  
 PROCNO 1

F2 - Acquisition Parameters

Date\_ 20070625  
 Time\_ 0.00  
 INSTRUM varian  
 PROBHD 40:5mmbroadban  
 PULPROG noesyh2o\_pfg\_800\_pin  
 TD 4096  
 SOLVENT CDCl3  
 NS 24  
 DS 64  
 SWH 11001.101 Hz  
 FIDRES 2.685816 Hz  
 AQ 0.1862132 sec  
 RG 128  
 DW 45.450 usec  
 DE 6.00 usec  
 TE 268.0 K

F1 - Acquisition parameters

ND0 1  
 TD 1024  
 SFO1 799.8107 MHz  
 FIDRES 10.743262 Hz  
 SW 13.755 ppm  
 FwMODE undefined

F2 - Processing parameters

SI 2048  
 SF 799.8064143 MHz  
 WDW QSINE  
 SSB 2  
 LB 0.00 Hz  
 GB 0  
 PC 1.40

F1 - Processing parameters

SI 2048  
 MC2 States  
 SF 799.8064143 MHz  
 WDW QSINE  
 SSB 2  
 LB 0.00 Hz  
 GB 0

2D NMR plot parameters

CX2 15.00 cm  
 CX1 15.00 cm  
 F2PLO 11.006 ppm  
 F2LO 8802.41 Hz  
 F2PHI 5.599 ppm  
 F2HI 4478.25 Hz  
 F1PLO 5.600 ppm  
 F1LO 4478.92 Hz  
 F1PHI -0.100 ppm  
 F1HI -79.98 Hz  
 F2PPMCM 0.36043 ppm/cm  
 F2HZCM 288.27753 Hz/cm  
 F1PPMCM 0.38000 ppm/cm  
 F1HZCM 303.92645 Hz/cm

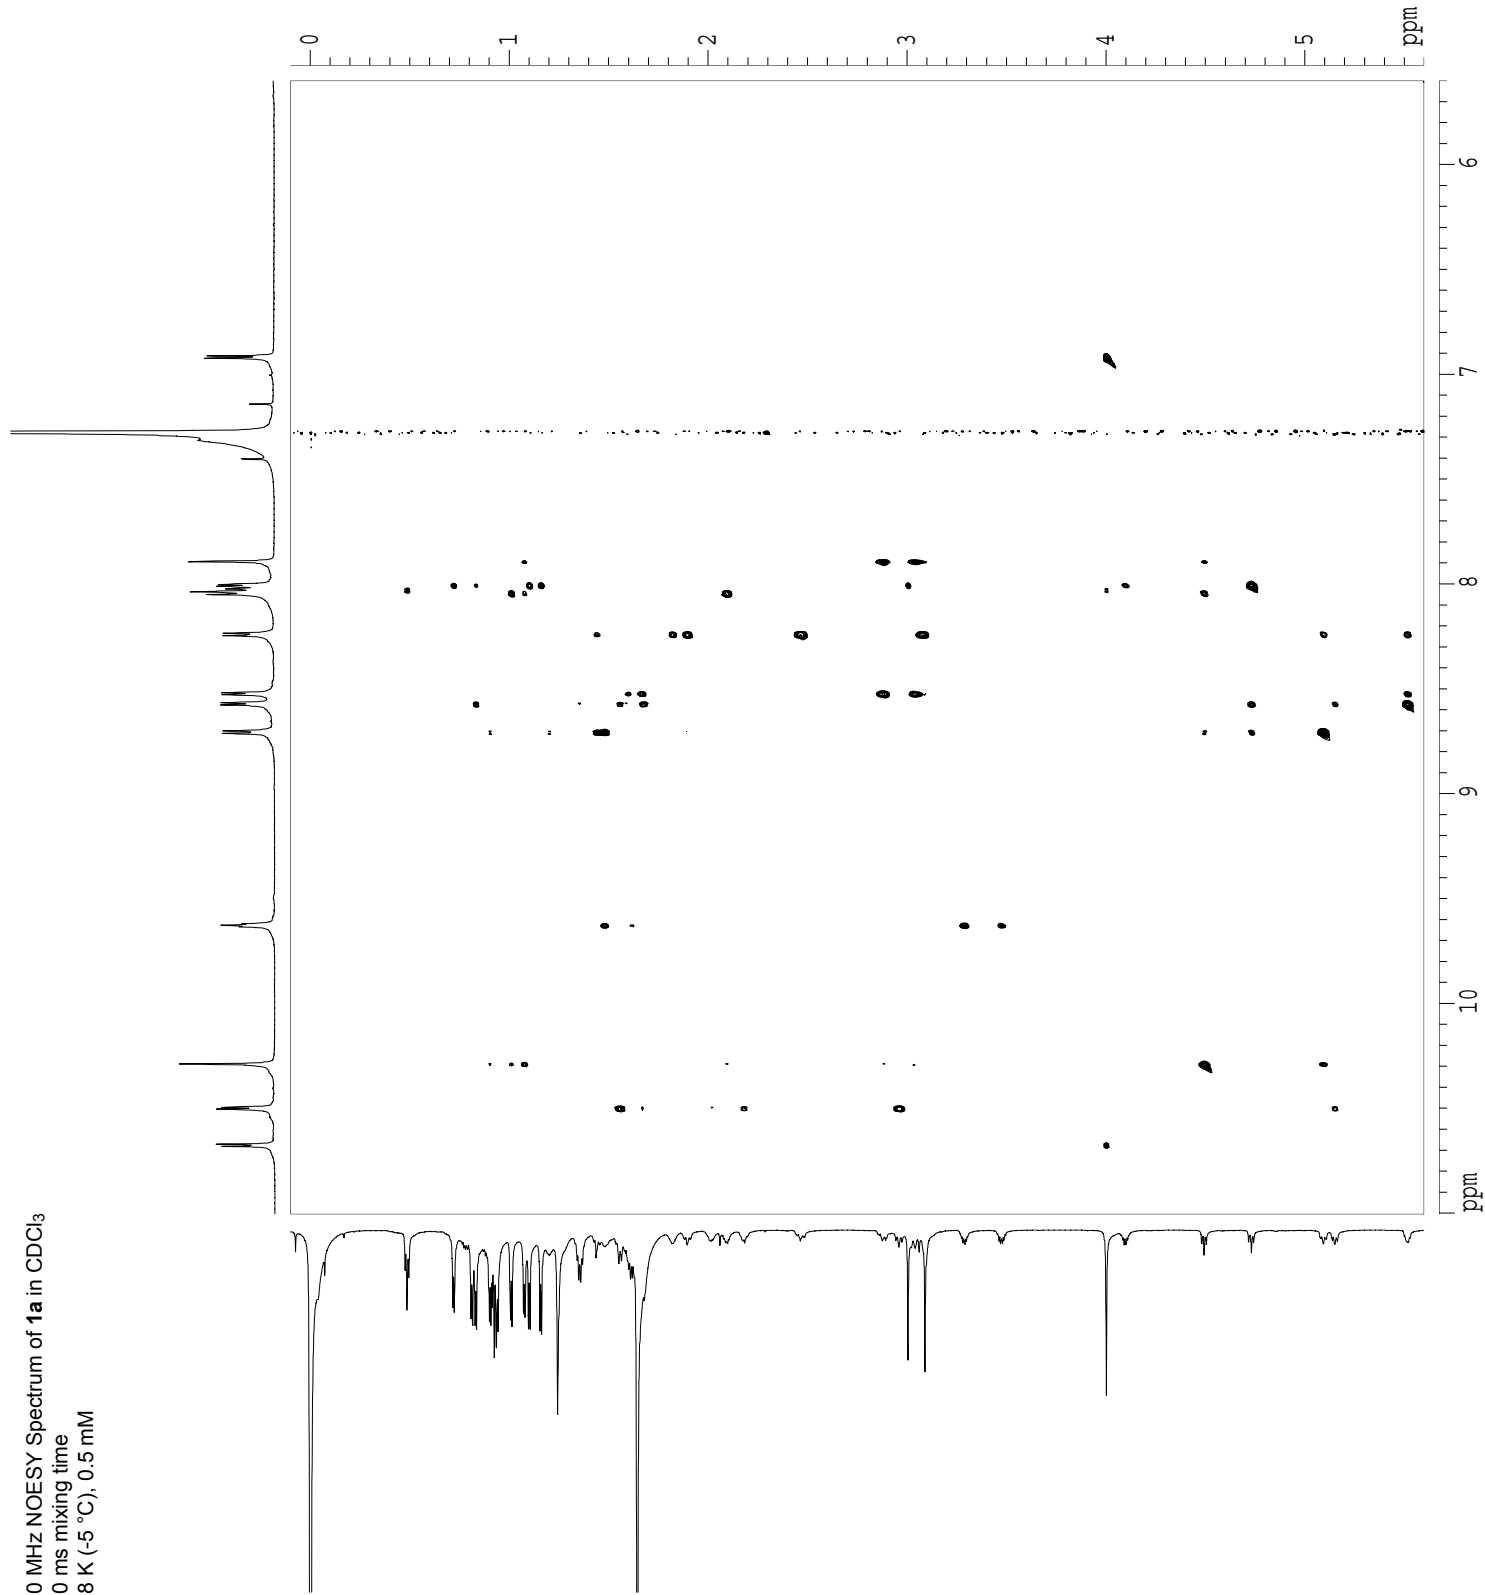

Supporting Information

S. Levin and J. S. Nowick

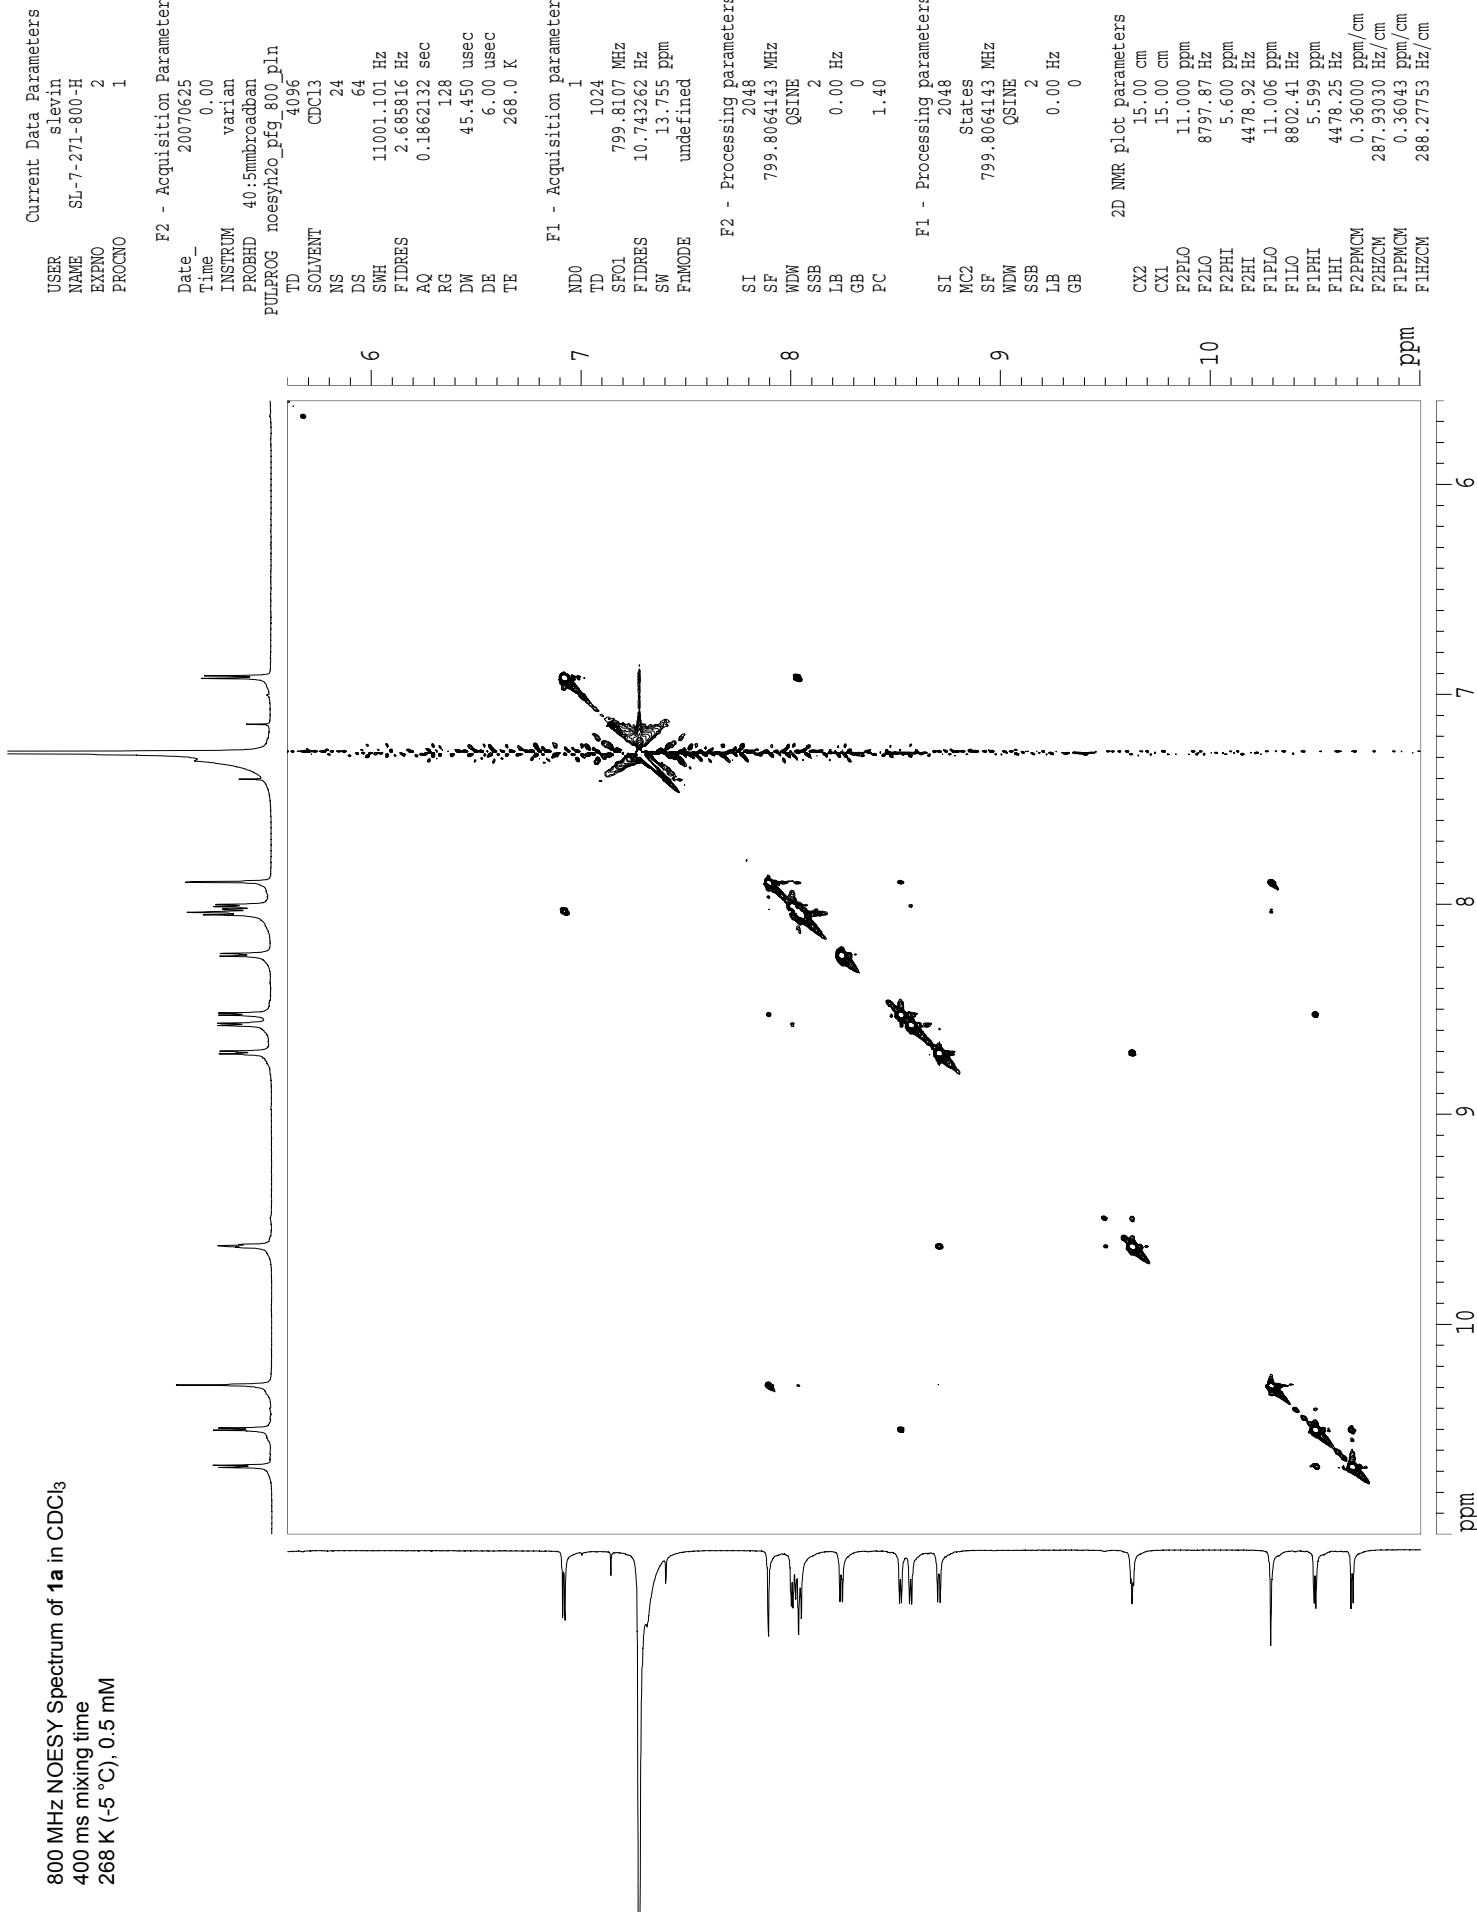

Supporting Information

S. Levin and J. S. Nowick

Current Data Parameters  
 USER slevin  
 NAME SL-7-271-800-H  
 EXPNO 2  
 PROCNO 1

F2 - Acquisition Parameters

Date\_ 20070625  
 Time 0.00  
 INSTRUM varian  
 PROBHD 40:5mmbrdabban  
 PULPROG noesyh2o\_pfg\_800\_pln  
 TD 4096

SOLVENT CDCl3  
 NS 24  
 DS 64  
 SWH 11001.101 Hz  
 FIDRES 2.685816 Hz  
 AQ 0.1862132 sec  
 RG 128  
 DW 45.450 usec  
 DE 6.00 usec  
 TE 268.0 K

F1 - Acquisition Parameters

ND0 1  
 TD 1024  
 SFO1 799.8107 MHz  
 FIDRES 10.743262 Hz  
 SW 13.755 ppm  
 F1MODE undefined

F2 - Processing parameters

SI 2048  
 SF 799.8064143 MHz  
 WDW QSI  
 SSB 2  
 LB 0.00 Hz  
 GB 0  
 PC 1.40

F1 - Processing parameters

SI 2048  
 MC2 States  
 SF 799.8064143 MHz  
 WDW QSI  
 SSB 2  
 LB 0.00 Hz  
 GB 0

2D NMR plot parameters

CX2 15.00 cm  
 CX1 15.00 cm  
 F2PLO 5.606 ppm  
 F2LO 4483.62 Hz  
 F2PHI -0.103 ppm  
 F2HI -82.27 Hz  
 F1PLO 11.000 ppm  
 F1LO 8797.87 Hz  
 F1PHI 5.600 ppm  
 F1HI 4478.92 Hz  
 F2P1MCM 0.38058 ppm/cm  
 F2H1MCM 304.39243 Hz/cm  
 F1P1MCM 0.36000 ppm/cm  
 F1H1MCM 287.93030 Hz/cm

800 MHz NOESY Spectrum of **1a** in CDCl<sub>3</sub>  
 400 ms mixing time  
 268 K (-5 °C), 0.5 mM

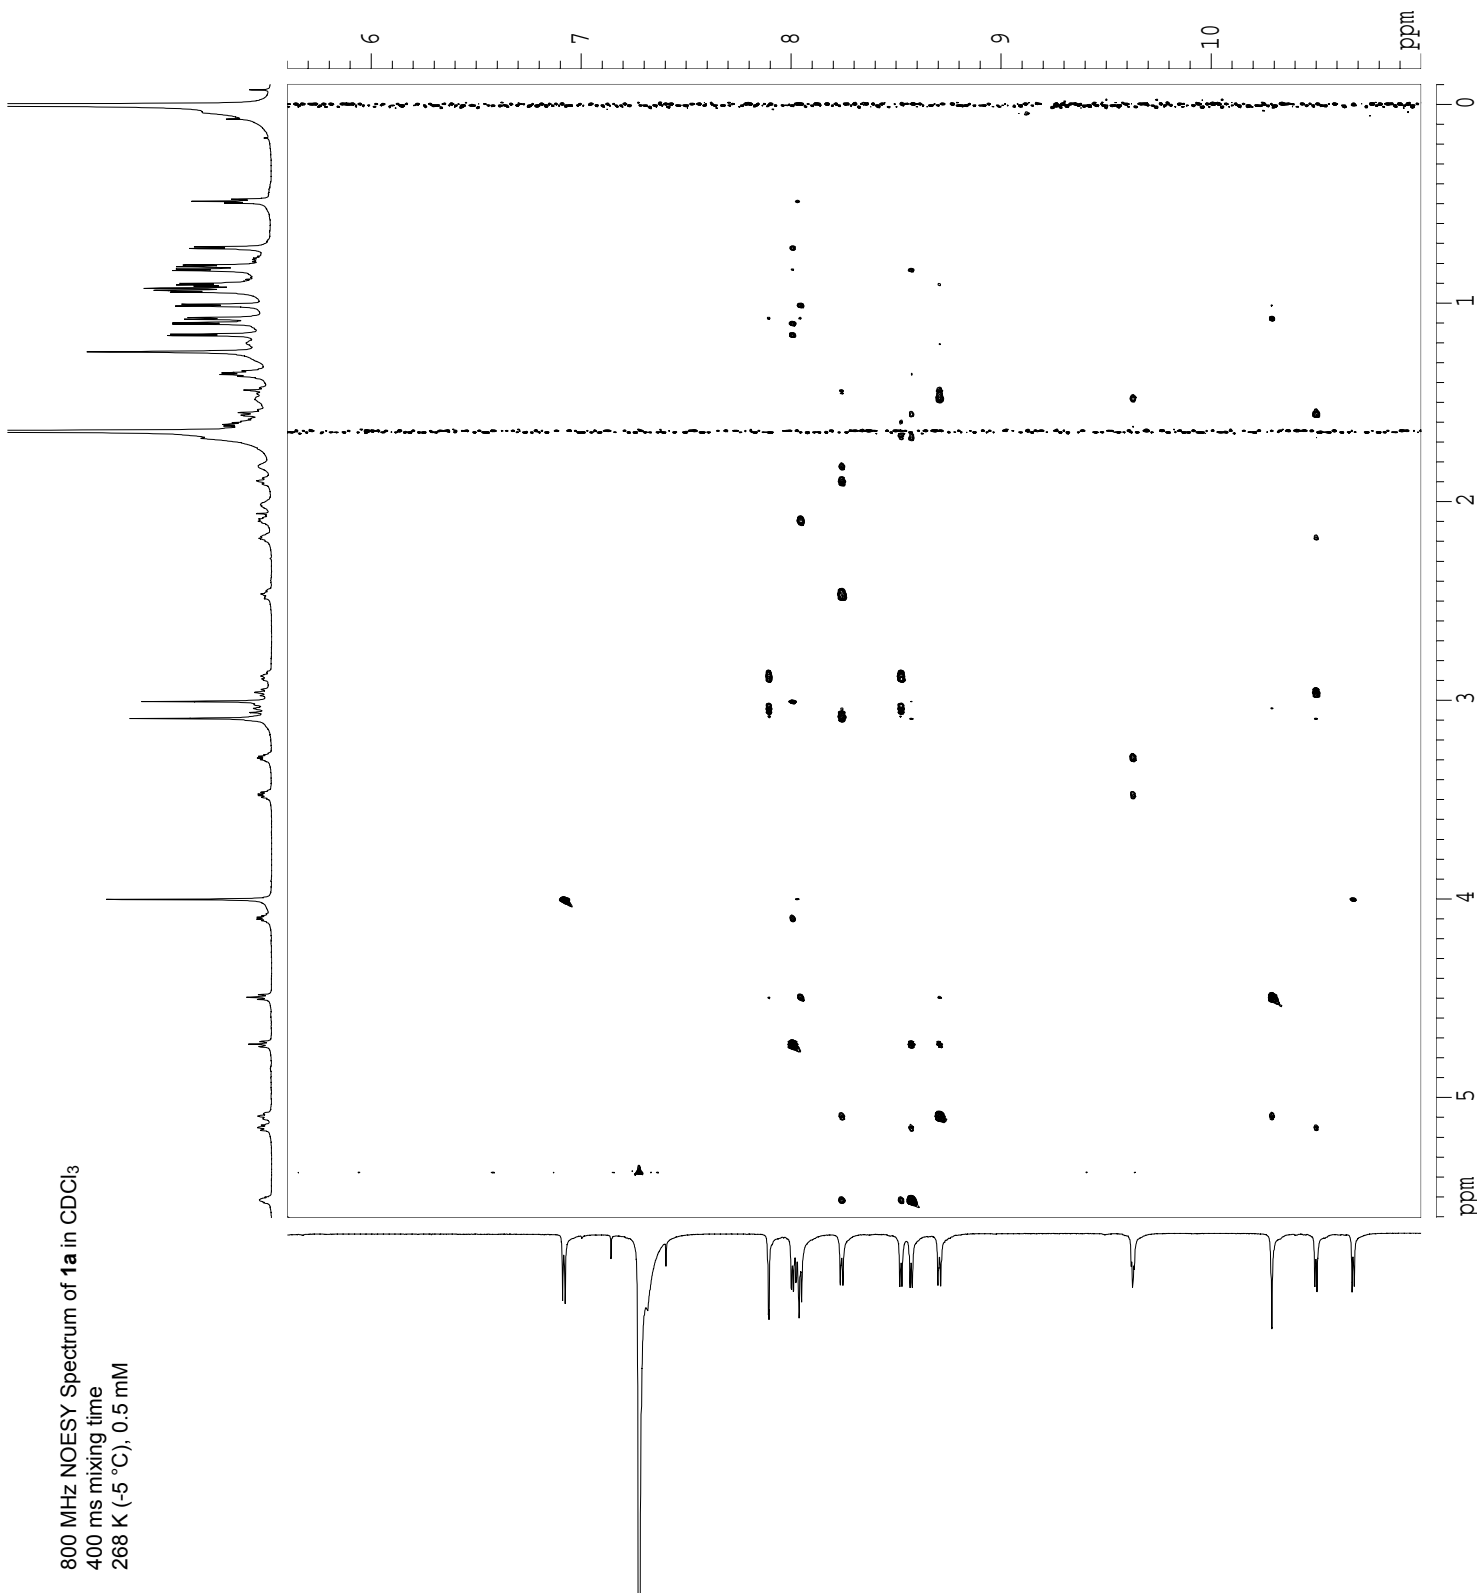

```

Current Data Parameter
USER      slevin
NAME     SL-7-23-HMQC-N-H
PROCNO   4
PROBHD   5 mm TBI 1H/13
PULPROG  hmqcspcf
TD       888
SOLVENT  CDCl3
NS       16
DS       16
SWH      7211.539 Hz
FIDRES   8.121102 Hz
AQ       0.0616180 sec
RG       2050
DM       69.333 usec
DE       6.00 usec
TE       268.0 K
CNS2     145.0000000
D0       0.0000300 sec
D1       1.1600000 sec
d2       0.0344838 sec
d12      0.0002000 sec
d13      0.0000400 sec
D16      0.0022000 sec
DELTA1   0.0222438 sec
IN0      0.0001655 sec

***** CHANNEL f1 *****
NUC1     1H
P1       8.00 usec
PL1      0.00 dB
PC1      1.00
SFO1     600.1335488 MHz

***** CHANNEL f2 *****
CPDPRG2  gsp
NUC2     13C
P2       15.00 usec
PL2      -1.00 dB
PC2      1.00
SFO2     150.9179793 MHz

***** GRADIENT CHANNEL *****
GPM1     SINE.100
GPM2     SINE.100
GPM3     SINE.100
GPZ1     50.00 %
GPZ2     30.00 %
GPZ3     40.10 %
P16      1000.00 usec

F1 - Acquisition parameter
NU0      2
TD       512
SFO1     150.9179 MHz
FIDRES   59.006798 Hz
SW       200.185 ppm
PwMODE   QF

F2 - Processing parameter
SI       2048
SF       600.1300263 MHz
AQ       0.0616180 sec
SFO      150.9179793 MHz
SSB      0
LB       5.00 Hz
GB       0
PC       1.00

F1 - Processing parameter
SI       2048
MC2     QF
SF       150.9028353 MHz
AQ       0.0616180 sec
SFO      150.9179793 MHz
SSB      0
LB       5.00 Hz
GB       0

2D NMR plot parameter
CX2     18.00 cm
CX1     15.00 cm
F2P2LO  3.161 ppm
F2P2HI  1908.776 Hz
F2P1HI  2.36 ppm
F2P1LO  140.10 ppm
F1P2LO  4796.79 Hz
F1P2HI  23.050 ppm
F1P1HI  4383.75 Hz
F2P2MCM 0.04694 ppm/cm
F2P1MCM 28.17007 Hz/cm
F1P2MCM 0.18248 ppm/cm
F1P1MCM 27.53650 Hz/cm
    
```

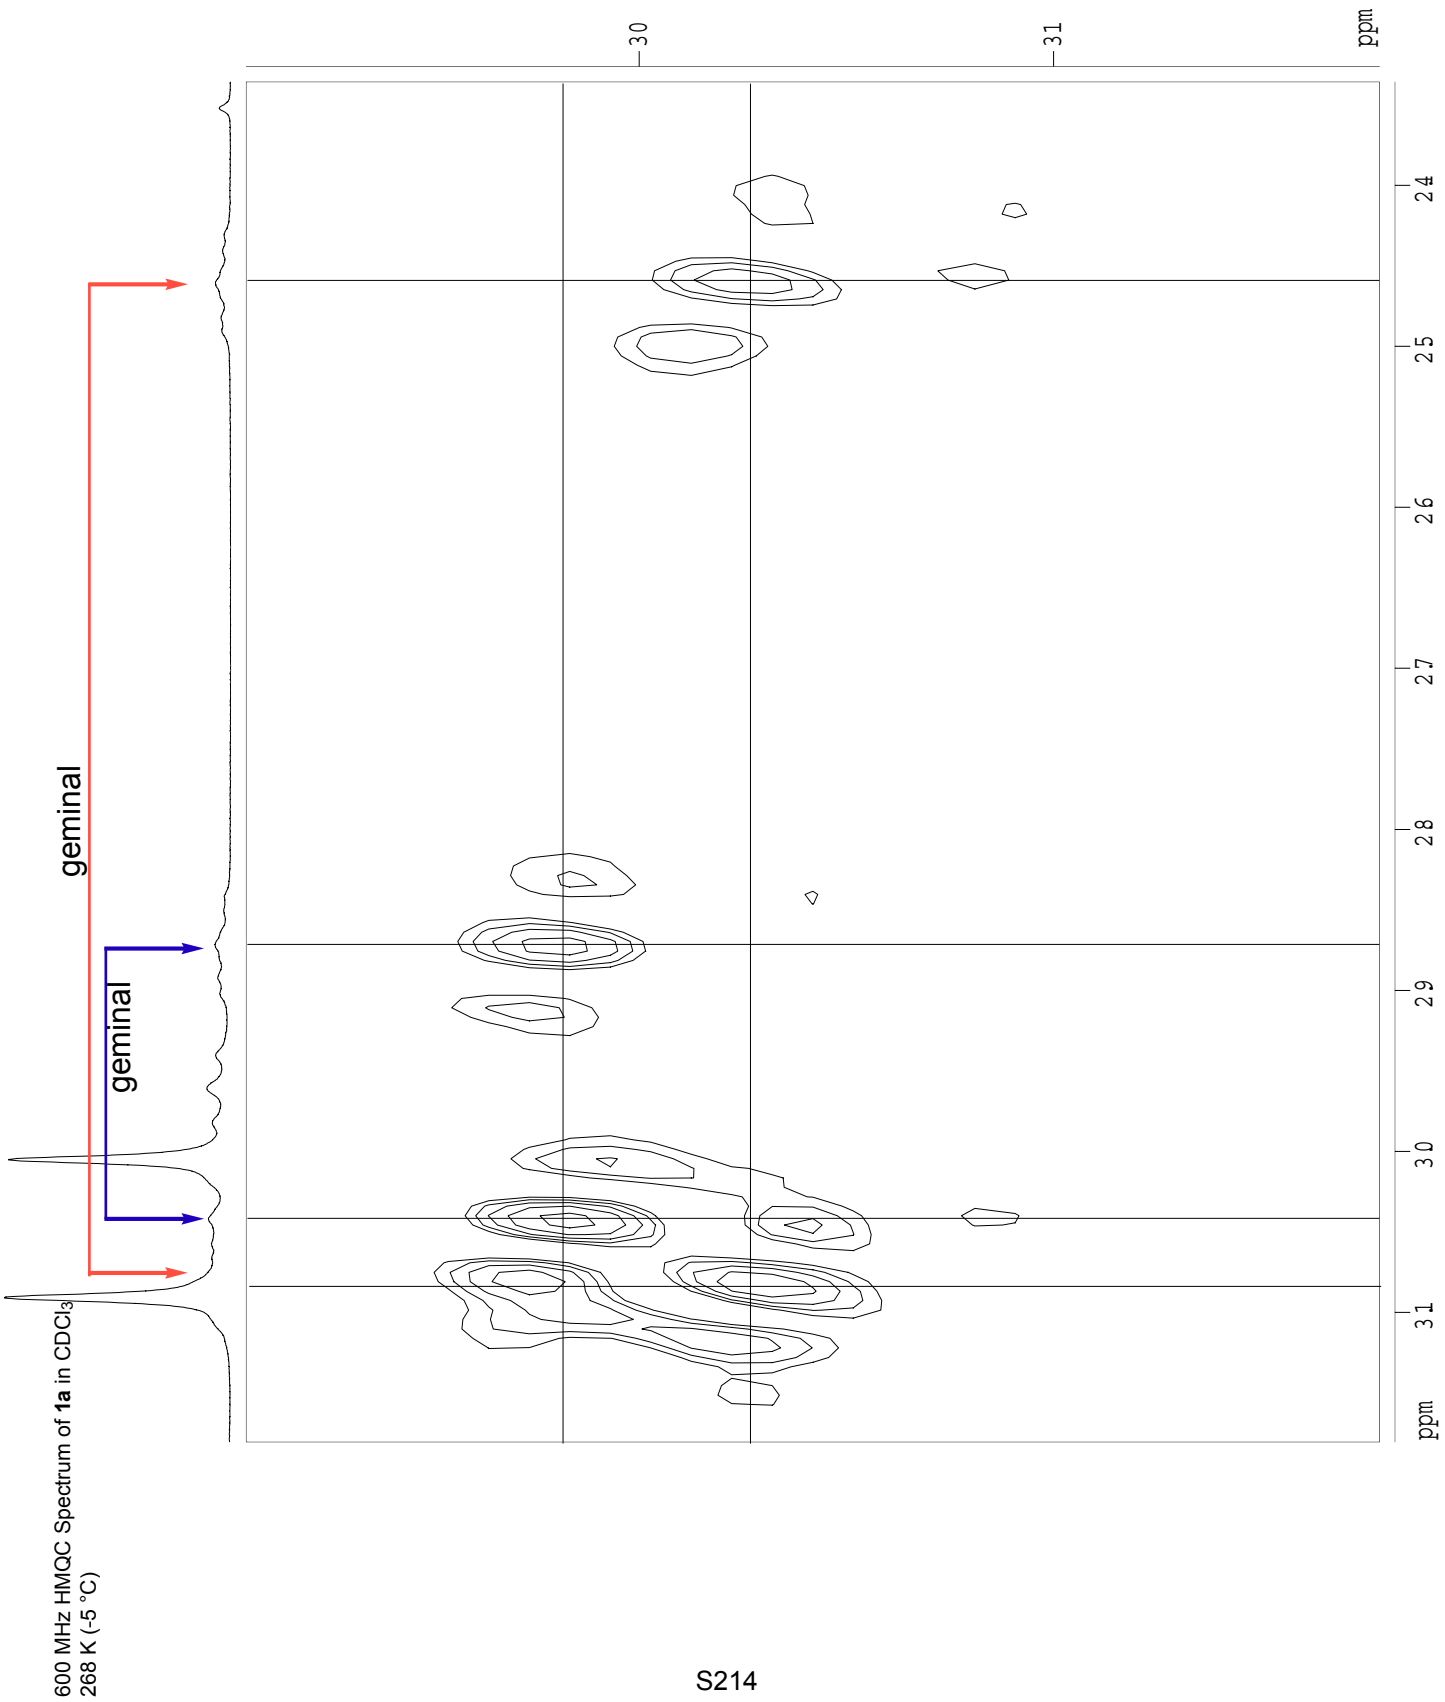

Supplement: NIHMS62690-supplement-1si20070814_05.pdf [file NIHMS62690-supplement-1si20070814_05.pdf]
